# Supplementary material for: Metabolic profiling during malaria reveals the role of the aryl hydrocarbon receptor in regulating kidney injury
Source: eLife. 2020 Oct 6;9:e60165. doi: 10.7554/eLife.60165 (PMC7538157; doi:10.7554/eLife.60165)
Supplement: Figure 1—figure supplement 2—source data 1. [file elife-60165-fig1-figsupp2-data1.xlsx]

## Sheet: 1 supplement 2A
tracking_id	sample	fpkm	organ	dpi	condition
Blvra	day0_0	17.8218	liver	0	uninfected
Blvra	day0_3	12.7202	liver	0	uninfected
Blvra	day0_1	16.7806	liver	0	uninfected
Blvra	day0_2	17.6535	liver	0	uninfected
Blvra	day7_0	31.9023	liver	7	infected
Blvra	day7_1	26.3963	liver	7	infected
Blvra	day8_0	25.5153	liver	8	infected
Blvra	day8_3	26.3436	liver	8	infected
Blvra	day8_2	29.5145	liver	8	infected
Blvra	day8_1	25.637	liver	8	infected
Blvra	day8_4	28.9456	liver	8	infected
Blvra	day8_ui_0	14.6634	liver	8	uninfected
Blvra	day8_ui_1	11.5888	liver	8	uninfected
Blvra	day9_1	27.0099	liver	9	infected
Blvra	day9_0	28.835	liver	9	infected
Blvra	day10_3	24.7402	liver	10	infected
Blvra	day10_0	33.2407	liver	10	infected
Blvra	day10_2	16.1555	liver	10	infected
Blvra	day10_1	34.0238	liver	10	infected
Blvra	day10_4	41.6952	liver	10	infected
Blvra	day10_ui_0	18.5034	liver	10	uninfected
Blvra	day10_ui_1	18.5425	liver	10	uninfected
Blvra	day11_1	32.0939	liver	11	infected
Blvra	day11_0	42.6333	liver	11	infected
Hmox1	day0_0	23.541	liver	0	uninfected
Hmox1	day0_3	16.9229	liver	0	uninfected
Hmox1	day0_1	103.465	liver	0	uninfected
Hmox1	day0_2	51.6467	liver	0	uninfected
Hmox1	day7_0	238.565	liver	7	infected
Hmox1	day7_1	182.392	liver	7	infected
Hmox1	day8_0	255.063	liver	8	infected
Hmox1	day8_3	2075.84	liver	8	infected
Hmox1	day8_2	823.371	liver	8	infected
Hmox1	day8_1	1210.99	liver	8	infected
Hmox1	day8_4	1372.04	liver	8	infected
Hmox1	day8_ui_0	25.213	liver	8	uninfected
Hmox1	day8_ui_1	35.6814	liver	8	uninfected
Hmox1	day9_1	898.424	liver	9	infected
Hmox1	day9_0	1230.99	liver	9	infected
Hmox1	day10_3	297.927	liver	10	infected
Hmox1	day10_0	812.076	liver	10	infected
Hmox1	day10_2	14.961	liver	10	infected
Hmox1	day10_1	1408.74	liver	10	infected
Hmox1	day10_4	999.561	liver	10	infected
Hmox1	day10_ui_0	33.1363	liver	10	uninfected
Hmox1	day10_ui_1	48.0329	liver	10	uninfected
Hmox1	day11_1	719.231	liver	11	infected
Hmox1	day11_0	683.192	liver	11	infected

## Sheet: 1 supplement 2B
metabolite	stage	patient	scaled intensity
arachidonate	acute	3170	1.039
arachidonate	acute	3173	1.1137
arachidonate	acute	3176	1.3109
arachidonate	acute	3177	0.497
arachidonate	acute	3182	0.6281
arachidonate	acute	3185	0.7914
arachidonate	acute	3198	1.1502
arachidonate	acute	3200	1.1751
arachidonate	acute	3201	0.7176
arachidonate	acute	3209	0.5333
arachidonate	acute	3194	0.8515
arachidonate	convalescent	3185	0.4308
arachidonate	convalescent	3170	0.5005
arachidonate	convalescent	3173	0.9249
arachidonate	convalescent	3209	0.3342
arachidonate	convalescent	3176	0.5628
arachidonate	convalescent	3177	0.5415
arachidonate	convalescent	3182	0.6327
arachidonate	convalescent	3194	0.3613
arachidonate	convalescent	3198	0.7251
arachidonate	convalescent	3200	0.6149
arachidonate	convalescent	3201	0.6398
BHBA	acute	3170	5.9888
BHBA	acute	3173	1.4714
BHBA	acute	3176	1.2743
BHBA	acute	3177	0.1151
BHBA	acute	3182	2.7348
BHBA	acute	3185	1.0747
BHBA	acute	3198	1.4402
BHBA	acute	3200	1
BHBA	acute	3201	0.4843
BHBA	acute	3209	0.5234
BHBA	acute	3194	0.216
BHBA	convalescent	3185	0.0227
BHBA	convalescent	3170	0.0207
BHBA	convalescent	3173	0.0468
BHBA	convalescent	3209	0.0194
BHBA	convalescent	3176	0.0267
BHBA	convalescent	3177	0.0503
BHBA	convalescent	3182	0.0971
BHBA	convalescent	3194	0.0185
BHBA	convalescent	3198	0.0511
BHBA	convalescent	3200	0.0401
BHBA	convalescent	3201	0.0359
heme	acute	3170	1.4031
heme	acute	3173	1.1309
heme	acute	3176	0.7332
heme	acute	3177	1.3953
heme	acute	3182	1.865
heme	acute	3185	6.7593
heme	acute	3198	0.4755
heme	acute	3200	0.2442
heme	acute	3201	1.6883
heme	acute	3209	19.2812
heme	acute	3194	0.9451
heme	convalescent	3185	4.4581
heme	convalescent	3170	0.4709
heme	convalescent	3173	0.8339
heme	convalescent	3209	0.1932
heme	convalescent	3176	1.88
heme	convalescent	3177	0.5589
heme	convalescent	3182	1.9744
heme	convalescent	3194	0.1257
heme	convalescent	3198	0.8137
heme	convalescent	3200	0.1257
heme	convalescent	3201	0.7211
stachydrine	acute	3170	0.7344
stachydrine	acute	3173	0.2817
stachydrine	acute	3176	0.7588
stachydrine	acute	3177	0.1108
stachydrine	acute	3182	0.7388
stachydrine	acute	3185	5.26
stachydrine	acute	3198	0.0676
stachydrine	acute	3200	0.0762
stachydrine	acute	3201	0.3115
stachydrine	acute	3209	17.7428
stachydrine	acute	3194	0.9764
stachydrine	convalescent	3185	1.4731
stachydrine	convalescent	3170	3.9813
stachydrine	convalescent	3173	2.5059
stachydrine	convalescent	3209	13.3645
stachydrine	convalescent	3176	1.282
stachydrine	convalescent	3177	0.8706
stachydrine	convalescent	3182	1.616
stachydrine	convalescent	3194	5.2891
stachydrine	convalescent	3198	1.71
stachydrine	convalescent	3200	1
stachydrine	convalescent	3201	2.2399
