# Supplementary material for: Metabolic profiling during malaria reveals the role of the aryl hydrocarbon receptor in regulating kidney injury
Source: eLife. 2020 Oct 6;9:e60165. doi: 10.7554/eLife.60165 (PMC7538157; doi:10.7554/eLife.60165)
Supplement: Figure 1—source data 1. [file elife-60165-fig1-data1.xlsx]

## Sheet: 1A
mouse	dpi	infected	percent.parasitemia
0_1	0	uninfected	0
0_2	0	uninfected	0
0_3	0	uninfected	0
0_4	0	uninfected	0
0_5	0	uninfected	0
0_6	0	uninfected	0
0_7	0	uninfected	0
5_1	5	infected	4.9
5_2	5	infected	1.3
5_3	5	infected	1.1
5_4	5	infected	3.6
5_5	5	infected	1.3
5_6	5	uninfected	0
5_7	5	uninfected	0
6_1	6	infected	6
6_2	6	infected	2.7
6_3	6	infected	4.5
6_4	6	infected	10.8
6_5	6	infected	6.5
6_6	6	uninfected	0
6_7	6	uninfected	0
7_1	7	infected	19.8
7_2	7	infected	23.1
7_3	7	infected	18.3
7_4	7	infected	13.1
7_5	7	infected	21.7
7_6	7	uninfected	0
7_7	7	uninfected	0
8_1	8	infected	36.8
8_2	8	infected	30.5
8_3	8	infected	25.2
8_4	8	infected	34.6
8_5	8	infected	26.3
8_6	8	uninfected	0
8_7	8	uninfected	0
9_1	9	infected	33
9_2	9	infected	26.6
9_3	9	infected	29.7
9_4	9	infected	28.1
9_5	9	infected	35.4
9_6	9	uninfected	0
9_7	9	uninfected	0
10_1	10	infected	5.3
10_2	10	infected	23.6
10_3	10	infected	12.3
10_4	10	infected	27.8
10_5	10	infected	12.9
10_6	10	uninfected	0
10_7	10	uninfected	0
11_1	11	infected	7.7
11_2	11	infected	9.3
11_3	11	infected	7.5
11_4	11	infected	20.2
11_5	11	infected	4.9
11_6	11	uninfected	0
11_7	11	uninfected	0
12_1	12	infected	2.8
12_2	12	infected	2.1
12_3	12	infected	2.4
12_4	12	infected	1.5
12_5	12	infected	2.7
12_6	12	uninfected	0
12_7	12	uninfected	0
13_1	13	infected	1.3
13_2	13	infected	2.4
13_3	13	infected	1.1
13_4	13	infected	2.9
13_5	13	infected	1.3
13_6	13	uninfected	0
13_7	13	uninfected	0
14_1	14	infected	6.3
14_2	14	infected	2.2
14_3	14	infected	0
14_4	14	infected	1.7
14_5	14	infected	10.9
14_6	14	uninfected	0
14_7	14	uninfected	0
15_1	15	infected	4.7
15_2	15	infected	8.1
15_3	15	infected	5
15_4	15	infected	5.2
15_5	15	infected	4.3
15_6	15	uninfected	0
15_7	15	uninfected	0
16_1	16	infected	13.8
16_2	16	infected	2.4
16_3	16	infected	3.9
16_4	16	infected	7.7
16_5	16	infected	3.3
16_6	16	uninfected	0
16_7	16	uninfected	0
17_1	17	infected	2.8
17_2	17	infected	5.2
17_3	17	infected	1.1
17_4	17	infected	4.2
17_5	17	infected	3
17_6	17	uninfected	0
17_7	17	uninfected	0
18_1	18	infected	0
18_2	18	infected	0
18_3	18	infected	0
18_4	18	infected	0
18_5	18	infected	5.2
18_6	18	uninfected	0
18_7	18	uninfected	0
19_1	19	infected	0.1
19_2	19	infected	0.6
19_3	19	infected	0
19_4	19	infected	0.4
19_5	19	infected	6
19_6	19	uninfected	0
19_7	19	uninfected	0
20_1	20	infected	0
20_2	20	infected	0
20_3	20	infected	0
20_4	20	infected	0
20_5	20	infected	0
20_6	20	uninfected	0
20_7	20	uninfected	0
21_1	21	infected	0
21_2	21	infected	0
21_3	21	infected	0
21_4	21	infected	0
21_5	21	infected	0
21_6	21	uninfected	0
21_7	21	uninfected	0
22_1	22	infected	0
22_2	22	infected	0
22_3	22	infected	0
22_4	22	infected	0
22_5	22	infected	0
22_6	22	uninfected	0
22_7	22	uninfected	0
23_1	23	infected	0
23_2	23	infected	0
23_3	23	infected	0
23_4	23	infected	0
23_5	23	infected	0
23_6	23	uninfected	0
23_7	23	uninfected	0
24_1	24	infected	0
24_2	24	infected	1.1
24_3	24	infected	0
24_4	24	infected	0
24_5	24	infected	0
24_6	24	uninfected	0
24_7	24	uninfected	0
25_1	25	infected	0
25_2	25	infected	0
25_3	25	infected	0.5
25_4	25	infected	0
25_5	25	infected	0
25_6	25	uninfected	0
25_7	25	uninfected	0

## Sheet: 1B
mouse	dpi	variable	unit	infected	value
0_1	0	rbc	10^6 RBCs/ul blood	uninfected	9.26082
0_2	0	rbc	10^6 RBCs/ul blood	uninfected	6.14104
0_3	0	rbc	10^6 RBCs/ul blood	uninfected	6.16204
0_4	0	rbc	10^6 RBCs/ul blood	uninfected	5.61463
0_5	0	rbc	10^6 RBCs/ul blood	uninfected	8.56992
0_6	0	rbc	10^6 RBCs/ul blood	uninfected	6.62747
0_7	0	rbc	10^6 RBCs/ul blood	uninfected	7.67385
1_1	1	rbc	10^6 RBCs/ul blood	infected	7.30064
1_2	1	rbc	10^6 RBCs/ul blood	infected	6.85308
1_3	1	rbc	10^6 RBCs/ul blood	infected	6.47395
1_4	1	rbc	10^6 RBCs/ul blood	infected	7.17367
1_5	1	rbc	10^6 RBCs/ul blood	infected	6.7892
1_6	1	rbc	10^6 RBCs/ul blood	uninfected	6.69074
1_7	1	rbc	10^6 RBCs/ul blood	uninfected	7.12217
2_1	2	rbc	10^6 RBCs/ul blood	infected	7.33762
2_2	2	rbc	10^6 RBCs/ul blood	infected	9.04111
2_3	2	rbc	10^6 RBCs/ul blood	infected	5.75426
2_4	2	rbc	10^6 RBCs/ul blood	infected	7.4312
2_5	2	rbc	10^6 RBCs/ul blood	infected	7.50762
2_6	2	rbc	10^6 RBCs/ul blood	uninfected	7.55029
2_7	2	rbc	10^6 RBCs/ul blood	uninfected	6.75859
3_1	3	rbc	10^6 RBCs/ul blood	infected	8.10627
3_2	3	rbc	10^6 RBCs/ul blood	infected	6.97534
3_3	3	rbc	10^6 RBCs/ul blood	infected	7.43084
3_4	3	rbc	10^6 RBCs/ul blood	infected	6.76437
3_5	3	rbc	10^6 RBCs/ul blood	infected	7.90043
3_6	3	rbc	10^6 RBCs/ul blood	uninfected	6.768
3_7	3	rbc	10^6 RBCs/ul blood	uninfected	6.90216
4_1	4	rbc	10^6 RBCs/ul blood	infected	8.28015
4_2	4	rbc	10^6 RBCs/ul blood	infected	8.40092
4_3	4	rbc	10^6 RBCs/ul blood	infected	8.34449
4_4	4	rbc	10^6 RBCs/ul blood	infected	8.47512
4_5	4	rbc	10^6 RBCs/ul blood	infected	7.75792
4_6	4	rbc	10^6 RBCs/ul blood	uninfected	8.35745
4_7	4	rbc	10^6 RBCs/ul blood	uninfected	8.0116
5_1	5	rbc	10^6 RBCs/ul blood	infected	7.98673
5_2	5	rbc	10^6 RBCs/ul blood	infected	7.70323
5_3	5	rbc	10^6 RBCs/ul blood	infected	7.74131
5_4	5	rbc	10^6 RBCs/ul blood	infected	7.84072
5_5	5	rbc	10^6 RBCs/ul blood	infected	8.12029
5_6	5	rbc	10^6 RBCs/ul blood	uninfected	8.06032
5_7	5	rbc	10^6 RBCs/ul blood	uninfected	7.93024
6_1	6	rbc	10^6 RBCs/ul blood	infected	7.17259
6_2	6	rbc	10^6 RBCs/ul blood	infected	8.43325
6_3	6	rbc	10^6 RBCs/ul blood	infected	6.94682
6_4	6	rbc	10^6 RBCs/ul blood	infected	7.10342
6_5	6	rbc	10^6 RBCs/ul blood	infected	7.37141
6_6	6	rbc	10^6 RBCs/ul blood	uninfected	8.01943
6_7	6	rbc	10^6 RBCs/ul blood	uninfected	8.70998
7_1	7	rbc	10^6 RBCs/ul blood	infected	5.78664
7_2	7	rbc	10^6 RBCs/ul blood	infected	5.59051
7_3	7	rbc	10^6 RBCs/ul blood	infected	6.56878
7_4	7	rbc	10^6 RBCs/ul blood	infected	6.56652
7_5	7	rbc	10^6 RBCs/ul blood	infected	5.90564
7_6	7	rbc	10^6 RBCs/ul blood	uninfected	7.70174
7_7	7	rbc	10^6 RBCs/ul blood	uninfected	7.86496
8_1	8	rbc	10^6 RBCs/ul blood	infected	4.13094
8_2	8	rbc	10^6 RBCs/ul blood	infected	4.80929
8_3	8	rbc	10^6 RBCs/ul blood	infected	4.92979
8_4	8	rbc	10^6 RBCs/ul blood	infected	5.0181
8_5	8	rbc	10^6 RBCs/ul blood	infected	3.57602
8_6	8	rbc	10^6 RBCs/ul blood	uninfected	8.12268
8_7	8	rbc	10^6 RBCs/ul blood	uninfected	8.80055
9_1	9	rbc	10^6 RBCs/ul blood	infected	2.21767
9_2	9	rbc	10^6 RBCs/ul blood	infected	2.53528
9_3	9	rbc	10^6 RBCs/ul blood	infected	2.29069
9_4	9	rbc	10^6 RBCs/ul blood	infected	2.14488
9_5	9	rbc	10^6 RBCs/ul blood	infected	2.3427
9_6	9	rbc	10^6 RBCs/ul blood	uninfected	8.32293
9_7	9	rbc	10^6 RBCs/ul blood	uninfected	7.67876
10_1	10	rbc	10^6 RBCs/ul blood	infected	1.62644
10_2	10	rbc	10^6 RBCs/ul blood	infected	2.19277
10_3	10	rbc	10^6 RBCs/ul blood	infected	1.34491
10_4	10	rbc	10^6 RBCs/ul blood	infected	0.734282
10_5	10	rbc	10^6 RBCs/ul blood	infected	1.49094
10_6	10	rbc	10^6 RBCs/ul blood	uninfected	8.29224
10_7	10	rbc	10^6 RBCs/ul blood	uninfected	7.82239
11_1	11	rbc	10^6 RBCs/ul blood	infected	1.3579
11_2	11	rbc	10^6 RBCs/ul blood	infected	1.60934
11_3	11	rbc	10^6 RBCs/ul blood	infected	1.53059
11_4	11	rbc	10^6 RBCs/ul blood	infected	5.72633
11_5	11	rbc	10^6 RBCs/ul blood	infected	1.03168
11_6	11	rbc	10^6 RBCs/ul blood	uninfected	8.22106
11_7	11	rbc	10^6 RBCs/ul blood	uninfected	7.94559
12_1	12	rbc	10^6 RBCs/ul blood	infected	0.853205
12_2	12	rbc	10^6 RBCs/ul blood	infected	1.03838
12_3	12	rbc	10^6 RBCs/ul blood	infected	0.784851
12_4	12	rbc	10^6 RBCs/ul blood	infected	0.851915
12_5	12	rbc	10^6 RBCs/ul blood	infected	0.831829
12_6	12	rbc	10^6 RBCs/ul blood	uninfected	8.06599
12_7	12	rbc	10^6 RBCs/ul blood	uninfected	9.44427
13_1	13	rbc	10^6 RBCs/ul blood	infected	0.621909
13_2	13	rbc	10^6 RBCs/ul blood	infected	1.2914
13_3	13	rbc	10^6 RBCs/ul blood	infected	0.719449
13_4	13	rbc	10^6 RBCs/ul blood	infected	1.34256
13_5	13	rbc	10^6 RBCs/ul blood	infected	0.788854
13_6	13	rbc	10^6 RBCs/ul blood	uninfected	8.18831
13_7	13	rbc	10^6 RBCs/ul blood	uninfected	7.07882
14_1	14	rbc	10^6 RBCs/ul blood	infected	2.2307
14_2	14	rbc	10^6 RBCs/ul blood	infected	1.98012
14_3	14	rbc	10^6 RBCs/ul blood	infected	0.763464
14_4	14	rbc	10^6 RBCs/ul blood	infected	2.51515
14_5	14	rbc	10^6 RBCs/ul blood	infected	4.02917
14_6	14	rbc	10^6 RBCs/ul blood	uninfected	9.22729
14_7	14	rbc	10^6 RBCs/ul blood	uninfected	7.5272
15_1	15	rbc	10^6 RBCs/ul blood	infected	3.87638
15_2	15	rbc	10^6 RBCs/ul blood	infected	4.44858
15_3	15	rbc	10^6 RBCs/ul blood	infected	2.98528
15_4	15	rbc	10^6 RBCs/ul blood	infected	4.15555
15_5	15	rbc	10^6 RBCs/ul blood	infected	3.61152
15_6	15	rbc	10^6 RBCs/ul blood	uninfected	7.49765
15_7	15	rbc	10^6 RBCs/ul blood	uninfected	7.87771
16_1	16	rbc	10^6 RBCs/ul blood	infected	2.82311
16_2	16	rbc	10^6 RBCs/ul blood	infected	3.75269
16_3	16	rbc	10^6 RBCs/ul blood	infected	2.55758
16_4	16	rbc	10^6 RBCs/ul blood	infected	2.14621
16_5	16	rbc	10^6 RBCs/ul blood	infected	3.74491
16_6	16	rbc	10^6 RBCs/ul blood	uninfected	8.97082
16_7	16	rbc	10^6 RBCs/ul blood	uninfected	7.80998
17_1	17	rbc	10^6 RBCs/ul blood	infected	5.2872
17_2	17	rbc	10^6 RBCs/ul blood	infected	3.30926
17_3	17	rbc	10^6 RBCs/ul blood	infected	3.546
17_4	17	rbc	10^6 RBCs/ul blood	infected	2.45609
17_5	17	rbc	10^6 RBCs/ul blood	infected	2.38167
17_6	17	rbc	10^6 RBCs/ul blood	uninfected	8.96675
17_7	17	rbc	10^6 RBCs/ul blood	uninfected	7.91874
18_1	18	rbc	10^6 RBCs/ul blood	infected	3.5547
18_2	18	rbc	10^6 RBCs/ul blood	infected	5.40494
18_3	18	rbc	10^6 RBCs/ul blood	infected	5.49948
18_4	18	rbc	10^6 RBCs/ul blood	infected	4.28256
18_5	18	rbc	10^6 RBCs/ul blood	infected	5.41776
18_6	18	rbc	10^6 RBCs/ul blood	uninfected	9.12033
18_7	18	rbc	10^6 RBCs/ul blood	uninfected	8.43862
19_1	19	rbc	10^6 RBCs/ul blood	infected	3.27871
19_2	19	rbc	10^6 RBCs/ul blood	infected	2.01447
19_3	19	rbc	10^6 RBCs/ul blood	infected	2.04167
19_4	19	rbc	10^6 RBCs/ul blood	infected	1.83242
19_5	19	rbc	10^6 RBCs/ul blood	infected	4.47065
19_6	19	rbc	10^6 RBCs/ul blood	uninfected	7.99252
19_7	19	rbc	10^6 RBCs/ul blood	uninfected	7.53749
20_1	20	rbc	10^6 RBCs/ul blood	infected	7.17971
20_2	20	rbc	10^6 RBCs/ul blood	infected	5.74336
20_3	20	rbc	10^6 RBCs/ul blood	infected	6.41265
20_4	20	rbc	10^6 RBCs/ul blood	infected	4.26729
20_5	20	rbc	10^6 RBCs/ul blood	infected	5.87509
20_6	20	rbc	10^6 RBCs/ul blood	uninfected	8.59876
20_7	20	rbc	10^6 RBCs/ul blood	uninfected	8.19748
21_1	21	rbc	10^6 RBCs/ul blood	infected	7.3135
21_2	21	rbc	10^6 RBCs/ul blood	infected	7.96866
21_3	21	rbc	10^6 RBCs/ul blood	infected	6.67143
21_4	21	rbc	10^6 RBCs/ul blood	infected	5.77681
21_5	21	rbc	10^6 RBCs/ul blood	infected	6.312
21_6	21	rbc	10^6 RBCs/ul blood	uninfected	8.2097
21_7	21	rbc	10^6 RBCs/ul blood	uninfected	8.01052
22_1	22	rbc	10^6 RBCs/ul blood	infected	6.89918
22_2	22	rbc	10^6 RBCs/ul blood	infected	6.99216
22_3	22	rbc	10^6 RBCs/ul blood	infected	7.05615
22_4	22	rbc	10^6 RBCs/ul blood	infected	7.46078
22_5	22	rbc	10^6 RBCs/ul blood	infected	6.6103
22_6	22	rbc	10^6 RBCs/ul blood	uninfected	8.18346
22_7	22	rbc	10^6 RBCs/ul blood	uninfected	7.64373
23_1	23	rbc	10^6 RBCs/ul blood	infected	6.26064
23_2	23	rbc	10^6 RBCs/ul blood	infected	7.50166
23_3	23	rbc	10^6 RBCs/ul blood	infected	6.90045
23_4	23	rbc	10^6 RBCs/ul blood	infected	8.10239
23_5	23	rbc	10^6 RBCs/ul blood	infected	7.36506
23_6	23	rbc	10^6 RBCs/ul blood	uninfected	8.68217
23_7	23	rbc	10^6 RBCs/ul blood	uninfected	8.28043
24_1	24	rbc	10^6 RBCs/ul blood	infected	7.88502
24_2	24	rbc	10^6 RBCs/ul blood	infected	7.97926
24_3	24	rbc	10^6 RBCs/ul blood	infected	7.17611
24_4	24	rbc	10^6 RBCs/ul blood	infected	8.48463
24_5	24	rbc	10^6 RBCs/ul blood	infected	7.41277
24_6	24	rbc	10^6 RBCs/ul blood	uninfected	9.33612
24_7	24	rbc	10^6 RBCs/ul blood	uninfected	8.59383
25_1	25	rbc	10^6 RBCs/ul blood	infected	7.45286
25_2	25	rbc	10^6 RBCs/ul blood	infected	7.77159
25_3	25	rbc	10^6 RBCs/ul blood	infected	7.08925
25_4	25	rbc	10^6 RBCs/ul blood	infected	7.72765
25_5	25	rbc	10^6 RBCs/ul blood	infected	7.62322
25_6	25	rbc	10^6 RBCs/ul blood	uninfected	7.98134
25_7	25	rbc	10^6 RBCs/ul blood	uninfected	8.09591
30_1	30	rbc	10^6 RBCs/ul blood	infected	6.27797
30_2	30	rbc	10^6 RBCs/ul blood	infected	4.5256
30_3	30	rbc	10^6 RBCs/ul blood	infected	6.72731
30_4	30	rbc	10^6 RBCs/ul blood	infected	3.81322
30_5	30	rbc	10^6 RBCs/ul blood	infected	7.23615
30_6	30	rbc	10^6 RBCs/ul blood	uninfected	8.4296
30_7	30	rbc	10^6 RBCs/ul blood	uninfected	7.37821
45_1	45	rbc	10^6 RBCs/ul blood	infected	9.02648
45_2	45	rbc	10^6 RBCs/ul blood	infected	4.06534
45_3	45	rbc	10^6 RBCs/ul blood	infected	7.334
45_4	45	rbc	10^6 RBCs/ul blood	infected	7.02197
45_6	45	rbc	10^6 RBCs/ul blood	uninfected	7.62889
45_7	45	rbc	10^6 RBCs/ul blood	uninfected	7.24038
60_1	60	rbc	10^6 RBCs/ul blood	infected	8.45642
60_2	60	rbc	10^6 RBCs/ul blood	infected	8.37934
60_3	60	rbc	10^6 RBCs/ul blood	infected	7.96898
60_4	60	rbc	10^6 RBCs/ul blood	infected	7.81517
60_5	60	rbc	10^6 RBCs/ul blood	infected	8.28452
60_6	60	rbc	10^6 RBCs/ul blood	uninfected	8.16267
60_7	60	rbc	10^6 RBCs/ul blood	uninfected	7.95956
0_1	0	ALT	U/L	infected	21.6389
0_2	0	ALT	U/L	infected	25.3846
0_3	0	ALT	U/L	infected	21.7143
0_4	0	ALT	U/L	infected	23.0769
0_5	0	ALT	U/L	infected	31.0299
1_1	1	ALT	U/L	infected	24.1818
1_2	1	ALT	U/L	infected	27.4286
1_3	1	ALT	U/L	infected	37.0794
1_4	1	ALT	U/L	infected	30.8571
1_5	1	ALT	U/L	infected	27.4286
2_1	2	ALT	U/L	infected	36.7059
2_2	2	ALT	U/L	infected	27.9344
2_3	2	ALT	U/L	infected	31.0299
2_4	2	ALT	U/L	infected	29.7143
2_5	2	ALT	U/L	infected	29.8806
3_1	3	ALT	U/L	infected	26.6508
3_2	3	ALT	U/L	infected	30.4068
3_3	3	ALT	U/L	infected	31.0299
3_4	3	ALT	U/L	infected	32.9123
3_5	3	ALT	U/L	infected	28.9683
4_1	4	ALT	U/L	infected	24.2308
4_2	4	ALT	U/L	infected	36.4444
4_3	4	ALT	U/L	infected	36.7761
4_4	4	ALT	U/L	infected	37.1613
4_5	4	ALT	U/L	infected	27.6923
5_1	5	ALT	U/L	infected	151.219
5_2	5	ALT	U/L	infected	26.3333
5_3	5	ALT	U/L	infected	26.1081
5_4	5	ALT	U/L	infected	72.6897
5_5	5	ALT	U/L	infected	136
5_6	5	ALT	U/L	uninfected	30.3333
5_7	5	ALT	U/L	uninfected	24.4426
6_1	6	ALT	U/L	infected	80.3636
6_2	6	ALT	U/L	infected	38.5946
6_3	6	ALT	U/L	infected	123.212
6_4	6	ALT	U/L	infected	102.692
6_5	6	ALT	U/L	infected	102.426
7_1	7	ALT	U/L	infected	193.508
7_2	7	ALT	U/L	infected	629.689
7_3	7	ALT	U/L	infected	204.571
7_4	7	ALT	U/L	infected	90.381
7_5	7	ALT	U/L	infected	153.781
8_1	8	ALT	U/L	infected	4529.91
8_2	8	ALT	U/L	infected	479.818
8_3	8	ALT	U/L	infected	1287.34
8_4	8	ALT	U/L	infected	543.319
8_5	8	ALT	U/L	infected	194.961
8_6	8	ALT	U/L	uninfected	24.3333
8_7	8	ALT	U/L	uninfected	32.6667
9_1	9	ALT	U/L	infected	1918.81
9_2	9	ALT	U/L	infected	495.152
9_3	9	ALT	U/L	infected	3636.41
9_4	9	ALT	U/L	infected	1544.9
9_5	9	ALT	U/L	infected	883.846
10_1	10	ALT	U/L	infected	1773.33
10_2	10	ALT	U/L	infected	5652.68
10_3	10	ALT	U/L	infected	846.712
10_4	10	ALT	U/L	infected	48.193
10_5	10	ALT	U/L	infected	1346.89
10_6	10	ALT	U/L	uninfected	1.16393
10_7	10	ALT	U/L	uninfected	54.6322
11_1	11	ALT	U/L	infected	240.649
11_2	11	ALT	U/L	infected	876.353
11_3	11	ALT	U/L	infected	584
11_4	11	ALT	U/L	infected	1009.25
11_5	11	ALT	U/L	infected	400.714
12_1	12	ALT	U/L	infected	281.143
12_2	12	ALT	U/L	infected	63.3333
12_3	12	ALT	U/L	infected	151.875
12_4	12	ALT	U/L	infected	145.161
12_5	12	ALT	U/L	infected	48.2687
12_6	12	ALT	U/L	uninfected	25.1429
12_7	12	ALT	U/L	uninfected	34.7619
13_1	13	ALT	U/L	infected	53.0769
13_2	13	ALT	U/L	infected	54.4865
13_3	13	ALT	U/L	infected	52.3889
13_4	13	ALT	U/L	infected	49.641
13_5	13	ALT	U/L	infected	89.0312
14_1	14	ALT	U/L	infected	48.7333
14_2	14	ALT	U/L	infected	46.8571
14_3	14	ALT	U/L	infected	84.2778
14_4	14	ALT	U/L	infected	53.9118
14_5	14	ALT	U/L	infected	36.3243
15_1	15	ALT	U/L	infected	38.1463
15_2	15	ALT	U/L	infected	42.4412
15_3	15	ALT	U/L	infected	44.3425
15_4	15	ALT	U/L	infected	44.0649
15_5	15	ALT	U/L	infected	38.25
15_6	15	ALT	U/L	uninfected	25.6066
15_7	15	ALT	U/L	uninfected	26.4328
16_1	16	ALT	U/L	infected	35.8824
16_2	16	ALT	U/L	infected	33.2647
16_3	16	ALT	U/L	infected	42.7812
16_4	16	ALT	U/L	infected	50.6667
16_5	16	ALT	U/L	infected	29.2911
17_1	17	ALT	U/L	infected	45
17_2	17	ALT	U/L	infected	37.6479
17_3	17	ALT	U/L	infected	35.4928
17_4	17	ALT	U/L	infected	39.7297
17_5	17	ALT	U/L	infected	37.7826
18_1	18	ALT	U/L	infected	40.1471
18_2	18	ALT	U/L	infected	37.7826
18_3	18	ALT	U/L	infected	33.6032
18_4	18	ALT	U/L	infected	34.2857
18_5	18	ALT	U/L	infected	52.5952
19_1	19	ALT	U/L	infected	29.1325
19_2	19	ALT	U/L	infected	29.5135
19_3	19	ALT	U/L	infected	39.321
19_4	19	ALT	U/L	infected	96.3614
19_5	19	ALT	U/L	infected	34.9241
19_6	19	ALT	U/L	uninfected	35.5955
19_7	19	ALT	U/L	uninfected	26.6508
20_1	20	ALT	U/L	infected	29.1325
20_2	20	ALT	U/L	infected	27.038
20_3	20	ALT	U/L	infected	42
20_4	20	ALT	U/L	infected	29.5135
20_5	20	ALT	U/L	infected	36
21_1	21	ALT	U/L	infected	48.7333
21_2	21	ALT	U/L	infected	35.3056
21_3	21	ALT	U/L	infected	33.6585
21_4	21	ALT	U/L	infected	30.5526
21_5	21	ALT	U/L	infected	29.1707
22_1	22	ALT	U/L	infected	34.1667
22_2	22	ALT	U/L	infected	43.2055
22_3	22	ALT	U/L	infected	35.1892
22_4	22	ALT	U/L	infected	34.0541
22_5	22	ALT	U/L	infected	39.1515
23_1	23	ALT	U/L	infected	37.8529
23_2	23	ALT	U/L	infected	32.058
23_3	23	ALT	U/L	infected	30.9706
23_4	23	ALT	U/L	infected	38
23_5	23	ALT	U/L	infected	36.8824
24_1	24	ALT	U/L	infected	29.9394
24_2	24	ALT	U/L	infected	36.9231
24_3	24	ALT	U/L	infected	36.7059
24_4	24	ALT	U/L	infected	36.8485
24_5	24	ALT	U/L	infected	46.6944
25_1	25	ALT	U/L	infected	36.5714
25_2	25	ALT	U/L	infected	34.2857
25_3	25	ALT	U/L	infected	32.5161
25_4	25	ALT	U/L	infected	31.2188
25_5	25	ALT	U/L	infected	74.1549
25_6	25	ALT	U/L	uninfected	26.1507
25_7	25	ALT	U/L	uninfected	24.8571

## Sheet: 1C
mouse	dpi	infected	variable	unit	value
0_6	0	uninfected	B cells	cells/ul blood	1538.34
0_7	0	uninfected	B cells	cells/ul blood	785.324
1_1	1	infected	B cells	cells/ul blood	925.002
1_2	1	infected	B cells	cells/ul blood	1669.99
1_3	1	infected	B cells	cells/ul blood	2287.12
1_4	1	infected	B cells	cells/ul blood	1061.93
1_5	1	infected	B cells	cells/ul blood	1584.74
1_6	1	uninfected	B cells	cells/ul blood	875.751
1_7	1	uninfected	B cells	cells/ul blood	1359.52
2_1	2	infected	B cells	cells/ul blood	783.574
2_2	2	infected	B cells	cells/ul blood	1550.92
2_3	2	infected	B cells	cells/ul blood	1745.76
2_4	2	infected	B cells	cells/ul blood	2799.21
2_5	2	infected	B cells	cells/ul blood	2347.84
2_6	2	uninfected	B cells	cells/ul blood	2241.49
2_7	2	uninfected	B cells	cells/ul blood	1142.82
3_1	3	infected	B cells	cells/ul blood	2513.79
3_2	3	infected	B cells	cells/ul blood	1010.6
3_3	3	infected	B cells	cells/ul blood	1564.18
3_4	3	infected	B cells	cells/ul blood	1961.84
3_5	3	infected	B cells	cells/ul blood	2504.56
3_6	3	uninfected	B cells	cells/ul blood	1626.45
3_7	3	uninfected	B cells	cells/ul blood	1671.62
4_1	4	infected	B cells	cells/ul blood	930.427
4_2	4	infected	B cells	cells/ul blood	976.442
4_3	4	infected	B cells	cells/ul blood	383.803
4_4	4	infected	B cells	cells/ul blood	462.48
4_5	4	infected	B cells	cells/ul blood	1138.24
4_6	4	uninfected	B cells	cells/ul blood	2262.84
4_7	4	uninfected	B cells	cells/ul blood	3004.35
5_1	5	infected	B cells	cells/ul blood	731.943
5_2	5	infected	B cells	cells/ul blood	962.398
5_3	5	infected	B cells	cells/ul blood	529.562
5_4	5	infected	B cells	cells/ul blood	455.665
5_5	5	infected	B cells	cells/ul blood	501.672
5_6	5	uninfected	B cells	cells/ul blood	2255.2
5_7	5	uninfected	B cells	cells/ul blood	2918.16
6_1	6	infected	B cells	cells/ul blood	409.598
6_2	6	infected	B cells	cells/ul blood	595.159
6_3	6	infected	B cells	cells/ul blood	270.655
6_4	6	infected	B cells	cells/ul blood	287.081
6_5	6	infected	B cells	cells/ul blood	365.699
6_6	6	uninfected	B cells	cells/ul blood	693.063
6_7	6	uninfected	B cells	cells/ul blood	1709.99
7_1	7	infected	B cells	cells/ul blood	1853.21
7_2	7	infected	B cells	cells/ul blood	1091.96
7_3	7	infected	B cells	cells/ul blood	904.054
7_4	7	infected	B cells	cells/ul blood	582.378
7_5	7	infected	B cells	cells/ul blood	1631.66
7_6	7	uninfected	B cells	cells/ul blood	1263.98
7_7	7	uninfected	B cells	cells/ul blood	1760.75
8_1	8	infected	B cells	cells/ul blood	955.893
8_2	8	infected	B cells	cells/ul blood	689.54
8_3	8	infected	B cells	cells/ul blood	424.369
8_4	8	infected	B cells	cells/ul blood	434.902
8_5	8	infected	B cells	cells/ul blood	690.736
8_6	8	uninfected	B cells	cells/ul blood	778.335
8_7	8	uninfected	B cells	cells/ul blood	1075.37
9_1	9	infected	B cells	cells/ul blood	2690.23
9_2	9	infected	B cells	cells/ul blood	833.116
9_3	9	infected	B cells	cells/ul blood	1825.43
9_4	9	infected	B cells	cells/ul blood	3787.05
9_5	9	infected	B cells	cells/ul blood	4587.56
9_6	9	uninfected	B cells	cells/ul blood	1234.24
9_7	9	uninfected	B cells	cells/ul blood	1596.7
10_1	10	infected	B cells	cells/ul blood	4590.16
10_2	10	infected	B cells	cells/ul blood	1903.87
10_3	10	infected	B cells	cells/ul blood	5808.12
10_4	10	infected	B cells	cells/ul blood	3869.12
10_5	10	infected	B cells	cells/ul blood	7020.31
10_6	10	uninfected	B cells	cells/ul blood	1775.98
10_7	10	uninfected	B cells	cells/ul blood	2262.76
11_1	11	infected	B cells	cells/ul blood	4946.3
11_2	11	infected	B cells	cells/ul blood	3097.62
11_3	11	infected	B cells	cells/ul blood	1837.66
11_4	11	infected	B cells	cells/ul blood	386.16
11_5	11	infected	B cells	cells/ul blood	6654.68
11_6	11	uninfected	B cells	cells/ul blood	1302.39
11_7	11	uninfected	B cells	cells/ul blood	1536.57
12_1	12	infected	B cells	cells/ul blood	4375.41
12_2	12	infected	B cells	cells/ul blood	2498.84
12_3	12	infected	B cells	cells/ul blood	4905.71
12_4	12	infected	B cells	cells/ul blood	4769.17
12_5	12	infected	B cells	cells/ul blood	2927.69
12_6	12	uninfected	B cells	cells/ul blood	2756.76
12_7	12	uninfected	B cells	cells/ul blood	3381.5
13_1	13	infected	B cells	cells/ul blood	2871.02
13_2	13	infected	B cells	cells/ul blood	1975.35
13_3	13	infected	B cells	cells/ul blood	2526.34
13_4	13	infected	B cells	cells/ul blood	1221.22
13_5	13	infected	B cells	cells/ul blood	2299.28
13_6	13	uninfected	B cells	cells/ul blood	930.587
13_7	13	uninfected	B cells	cells/ul blood	2852.13
14_1	14	infected	B cells	cells/ul blood	1622.18
14_2	14	infected	B cells	cells/ul blood	1123.6
14_3	14	infected	B cells	cells/ul blood	1581.74
14_4	14	infected	B cells	cells/ul blood	1139.98
14_5	14	infected	B cells	cells/ul blood	859.556
14_6	14	uninfected	B cells	cells/ul blood	1344.55
14_7	14	uninfected	B cells	cells/ul blood	1434.5
15_1	15	infected	B cells	cells/ul blood	663.065
15_2	15	infected	B cells	cells/ul blood	1662.99
15_3	15	infected	B cells	cells/ul blood	1392.64
15_4	15	infected	B cells	cells/ul blood	920.448
15_5	15	infected	B cells	cells/ul blood	1289.83
15_6	15	uninfected	B cells	cells/ul blood	1727.97
15_7	15	uninfected	B cells	cells/ul blood	1656.39
16_1	16	infected	B cells	cells/ul blood	919.606
16_2	16	infected	B cells	cells/ul blood	1242.83
16_3	16	infected	B cells	cells/ul blood	1950.82
16_4	16	infected	B cells	cells/ul blood	1533.39
16_5	16	infected	B cells	cells/ul blood	1135.13
16_6	16	uninfected	B cells	cells/ul blood	2224.02
16_7	16	uninfected	B cells	cells/ul blood	1411.1
17_1	17	infected	B cells	cells/ul blood	653.986
17_2	17	infected	B cells	cells/ul blood	912.697
17_3	17	infected	B cells	cells/ul blood	1055.62
17_4	17	infected	B cells	cells/ul blood	1527.93
17_5	17	infected	B cells	cells/ul blood	1633.76
17_6	17	uninfected	B cells	cells/ul blood	1613.55
17_7	17	uninfected	B cells	cells/ul blood	2630.6
18_1	18	infected	B cells	cells/ul blood	976.01
18_2	18	infected	B cells	cells/ul blood	959.549
18_3	18	infected	B cells	cells/ul blood	840.293
18_4	18	infected	B cells	cells/ul blood	619.532
18_5	18	infected	B cells	cells/ul blood	186.879
18_6	18	uninfected	B cells	cells/ul blood	1778.94
18_7	18	uninfected	B cells	cells/ul blood	2431.02
19_1	19	infected	B cells	cells/ul blood	1095.86
19_2	19	infected	B cells	cells/ul blood	1183.36
19_3	19	infected	B cells	cells/ul blood	1207.53
19_4	19	infected	B cells	cells/ul blood	869.806
19_5	19	infected	B cells	cells/ul blood	670.597
19_6	19	uninfected	B cells	cells/ul blood	3123.78
19_7	19	uninfected	B cells	cells/ul blood	2133.33
20_1	20	infected	B cells	cells/ul blood	1728
20_2	20	infected	B cells	cells/ul blood	1071.36
20_3	20	infected	B cells	cells/ul blood	1558.18
20_4	20	infected	B cells	cells/ul blood	1111.86
20_5	20	infected	B cells	cells/ul blood	676.469
20_6	20	uninfected	B cells	cells/ul blood	1893.51
20_7	20	uninfected	B cells	cells/ul blood	2839.23
21_1	21	infected	B cells	cells/ul blood	1684.44
21_2	21	infected	B cells	cells/ul blood	1121.27
21_3	21	infected	B cells	cells/ul blood	2250.45
21_4	21	infected	B cells	cells/ul blood	1296.46
21_5	21	infected	B cells	cells/ul blood	842.827
21_6	21	uninfected	B cells	cells/ul blood	1389
21_7	21	uninfected	B cells	cells/ul blood	932.818
22_1	22	infected	B cells	cells/ul blood	1002.51
22_2	22	infected	B cells	cells/ul blood	1345.23
22_3	22	infected	B cells	cells/ul blood	2014.96
22_4	22	infected	B cells	cells/ul blood	1787.81
22_5	22	infected	B cells	cells/ul blood	1578.72
22_6	22	uninfected	B cells	cells/ul blood	971.388
22_7	22	uninfected	B cells	cells/ul blood	1414.99
23_1	23	infected	B cells	cells/ul blood	836.448
23_2	23	infected	B cells	cells/ul blood	927.149
23_3	23	infected	B cells	cells/ul blood	1208.52
23_4	23	infected	B cells	cells/ul blood	1530.69
23_5	23	infected	B cells	cells/ul blood	1471.08
23_6	23	uninfected	B cells	cells/ul blood	1648.26
23_7	23	uninfected	B cells	cells/ul blood	1595.86
24_1	24	infected	B cells	cells/ul blood	1416
24_2	24	infected	B cells	cells/ul blood	1098.47
24_3	24	infected	B cells	cells/ul blood	1444.64
24_4	24	infected	B cells	cells/ul blood	1902.34
24_5	24	infected	B cells	cells/ul blood	1590.45
24_6	24	uninfected	B cells	cells/ul blood	2071.98
24_7	24	uninfected	B cells	cells/ul blood	2323.68
25_1	25	infected	B cells	cells/ul blood	1408.65
25_2	25	infected	B cells	cells/ul blood	1236.86
25_3	25	infected	B cells	cells/ul blood	1998.91
25_4	25	infected	B cells	cells/ul blood	1492.52
25_5	25	infected	B cells	cells/ul blood	2817.19
25_6	25	uninfected	B cells	cells/ul blood	2969.22
25_7	25	uninfected	B cells	cells/ul blood	3129.13
30_1	30	infected	B cells	cells/ul blood	2891.87
30_2	30	infected	B cells	cells/ul blood	3041.98
30_3	30	infected	B cells	cells/ul blood	3831.64
30_4	30	infected	B cells	cells/ul blood	4015.53
30_5	30	infected	B cells	cells/ul blood	1965.47
30_6	30	uninfected	B cells	cells/ul blood	1683.72
30_7	30	uninfected	B cells	cells/ul blood	2293.07
45_1	45	infected	B cells	cells/ul blood	3102.85
45_2	45	infected	B cells	cells/ul blood	4609.86
45_3	45	infected	B cells	cells/ul blood	2615.41
45_4	45	infected	B cells	cells/ul blood	1041.38
45_6	45	uninfected	B cells	cells/ul blood	1366.01
45_7	45	uninfected	B cells	cells/ul blood	2307.27
60_1	60	infected	B cells	cells/ul blood	1888.82
60_2	60	infected	B cells	cells/ul blood	1874.96
60_3	60	infected	B cells	cells/ul blood	2563.39
60_4	60	infected	B cells	cells/ul blood	1493.84
60_5	60	infected	B cells	cells/ul blood	1693.58
60_6	60	uninfected	B cells	cells/ul blood	1451.85
60_7	60	uninfected	B cells	cells/ul blood	2261.75
0_6	0	uninfected	gd T cells	cells/ul blood	27.6866
0_7	0	uninfected	gd T cells	cells/ul blood	23.9185
1_1	1	infected	gd T cells	cells/ul blood	11.467
1_2	1	infected	gd T cells	cells/ul blood	41.4791
1_3	1	infected	gd T cells	cells/ul blood	25.488
1_4	1	infected	gd T cells	cells/ul blood	32.0085
1_5	1	infected	gd T cells	cells/ul blood	42.5433
1_6	1	uninfected	gd T cells	cells/ul blood	15.7635
1_7	1	uninfected	gd T cells	cells/ul blood	29.6757
2_1	2	infected	gd T cells	cells/ul blood	22.9899
2_2	2	infected	gd T cells	cells/ul blood	23.606
2_3	2	infected	gd T cells	cells/ul blood	22.4776
2_4	2	infected	gd T cells	cells/ul blood	17.3266
2_5	2	infected	gd T cells	cells/ul blood	58.5009
2_6	2	uninfected	gd T cells	cells/ul blood	57.0204
2_7	2	uninfected	gd T cells	cells/ul blood	31.5986
3_1	3	infected	gd T cells	cells/ul blood	52.5018
3_2	3	infected	gd T cells	cells/ul blood	23.8004
3_3	3	infected	gd T cells	cells/ul blood	23.4042
3_4	3	infected	gd T cells	cells/ul blood	26.6314
3_5	3	infected	gd T cells	cells/ul blood	68.2498
3_6	3	uninfected	gd T cells	cells/ul blood	42.5214
3_7	3	uninfected	gd T cells	cells/ul blood	35.9488
4_1	4	infected	gd T cells	cells/ul blood	6.53696
4_2	4	infected	gd T cells	cells/ul blood	19.7927
4_3	4	infected	gd T cells	cells/ul blood	10.781
4_4	4	infected	gd T cells	cells/ul blood	4.42565
4_5	4	infected	gd T cells	cells/ul blood	10.181
4_6	4	uninfected	gd T cells	cells/ul blood	34.9136
4_7	4	uninfected	gd T cells	cells/ul blood	27.4081
5_1	5	infected	gd T cells	cells/ul blood	29.1943
5_2	5	infected	gd T cells	cells/ul blood	24.2621
5_3	5	infected	gd T cells	cells/ul blood	16.1698
5_4	5	infected	gd T cells	cells/ul blood	20.5255
5_5	5	infected	gd T cells	cells/ul blood	6.37719
5_6	5	uninfected	gd T cells	cells/ul blood	65.5827
5_7	5	uninfected	gd T cells	cells/ul blood	33.3028
6_1	6	infected	gd T cells	cells/ul blood	22.2406
6_2	6	infected	gd T cells	cells/ul blood	13.177
6_3	6	infected	gd T cells	cells/ul blood	19.8481
6_4	6	infected	gd T cells	cells/ul blood	18.4026
6_5	6	infected	gd T cells	cells/ul blood	21.0612
6_6	6	uninfected	gd T cells	cells/ul blood	23.0323
6_7	6	uninfected	gd T cells	cells/ul blood	34.2913
7_1	7	infected	gd T cells	cells/ul blood	50.4476
7_2	7	infected	gd T cells	cells/ul blood	23.2333
7_3	7	infected	gd T cells	cells/ul blood	40.6316
7_4	7	infected	gd T cells	cells/ul blood	30.3849
7_5	7	infected	gd T cells	cells/ul blood	54.7946
7_6	7	uninfected	gd T cells	cells/ul blood	34.5461
7_7	7	uninfected	gd T cells	cells/ul blood	25.0343
8_1	8	infected	gd T cells	cells/ul blood	45.7782
8_2	8	infected	gd T cells	cells/ul blood	58.7109
8_3	8	infected	gd T cells	cells/ul blood	33.0347
8_4	8	infected	gd T cells	cells/ul blood	50.181
8_5	8	infected	gd T cells	cells/ul blood	47.0529
8_6	8	uninfected	gd T cells	cells/ul blood	36.0537
8_7	8	uninfected	gd T cells	cells/ul blood	25.2757
9_1	9	infected	gd T cells	cells/ul blood	61.1557
9_2	9	infected	gd T cells	cells/ul blood	41.3508
9_3	9	infected	gd T cells	cells/ul blood	51.1199
9_4	9	infected	gd T cells	cells/ul blood	63.9808
9_5	9	infected	gd T cells	cells/ul blood	83.3727
9_6	9	uninfected	gd T cells	cells/ul blood	19.6605
9_7	9	uninfected	gd T cells	cells/ul blood	36.5655
10_1	10	infected	gd T cells	cells/ul blood	59.8619
10_2	10	infected	gd T cells	cells/ul blood	76.1287
10_3	10	infected	gd T cells	cells/ul blood	92.7882
10_4	10	infected	gd T cells	cells/ul blood	37.1427
10_5	10	infected	gd T cells	cells/ul blood	101.116
10_6	10	uninfected	gd T cells	cells/ul blood	39.1759
10_7	10	uninfected	gd T cells	cells/ul blood	38.9072
11_1	11	infected	gd T cells	cells/ul blood	128.846
11_2	11	infected	gd T cells	cells/ul blood	96.8452
11_3	11	infected	gd T cells	cells/ul blood	60.3679
11_4	11	infected	gd T cells	cells/ul blood	51.3902
11_5	11	infected	gd T cells	cells/ul blood	168.626
11_6	11	uninfected	gd T cells	cells/ul blood	41.1053
11_7	11	uninfected	gd T cells	cells/ul blood	21.0201
12_1	12	infected	gd T cells	cells/ul blood	51.7757
12_2	12	infected	gd T cells	cells/ul blood	110.568
12_3	12	infected	gd T cells	cells/ul blood	190.385
12_4	12	infected	gd T cells	cells/ul blood	244.099
12_5	12	infected	gd T cells	cells/ul blood	192.924
12_6	12	uninfected	gd T cells	cells/ul blood	40.014
12_7	12	uninfected	gd T cells	cells/ul blood	54.8216
13_1	13	infected	gd T cells	cells/ul blood	112.183
13_2	13	infected	gd T cells	cells/ul blood	110.167
13_3	13	infected	gd T cells	cells/ul blood	136.447
13_4	13	infected	gd T cells	cells/ul blood	94.8971
13_5	13	infected	gd T cells	cells/ul blood	175.447
13_6	13	uninfected	gd T cells	cells/ul blood	10.7458
13_7	13	uninfected	gd T cells	cells/ul blood	44.9449
14_1	14	infected	gd T cells	cells/ul blood	93.4926
14_2	14	infected	gd T cells	cells/ul blood	70.6088
14_3	14	infected	gd T cells	cells/ul blood	88.7446
14_4	14	infected	gd T cells	cells/ul blood	73.4945
14_5	14	infected	gd T cells	cells/ul blood	116.846
14_6	14	uninfected	gd T cells	cells/ul blood	67.1076
14_7	14	uninfected	gd T cells	cells/ul blood	31.5276
15_1	15	infected	gd T cells	cells/ul blood	134.07
15_2	15	infected	gd T cells	cells/ul blood	77.6262
15_3	15	infected	gd T cells	cells/ul blood	58.213
15_4	15	infected	gd T cells	cells/ul blood	138.067
15_5	15	infected	gd T cells	cells/ul blood	133.897
15_6	15	uninfected	gd T cells	cells/ul blood	42.9553
15_7	15	uninfected	gd T cells	cells/ul blood	35.2424
16_1	16	infected	gd T cells	cells/ul blood	131.372
16_2	16	infected	gd T cells	cells/ul blood	372.579
16_3	16	infected	gd T cells	cells/ul blood	789.745
16_4	16	infected	gd T cells	cells/ul blood	85.0384
16_5	16	infected	gd T cells	cells/ul blood	378.378
16_6	16	uninfected	gd T cells	cells/ul blood	44.3869
16_7	16	uninfected	gd T cells	cells/ul blood	22.4308
17_1	17	infected	gd T cells	cells/ul blood	159.429
17_2	17	infected	gd T cells	cells/ul blood	407.475
17_3	17	infected	gd T cells	cells/ul blood	1036.52
17_4	17	infected	gd T cells	cells/ul blood	656.796
17_5	17	infected	gd T cells	cells/ul blood	812.571
17_6	17	uninfected	gd T cells	cells/ul blood	44.3667
17_7	17	uninfected	gd T cells	cells/ul blood	41.4594
18_1	18	infected	gd T cells	cells/ul blood	792.146
18_2	18	infected	gd T cells	cells/ul blood	624.305
18_3	18	infected	gd T cells	cells/ul blood	918.857
18_4	18	infected	gd T cells	cells/ul blood	946.226
18_5	18	infected	gd T cells	cells/ul blood	15.4303
18_6	18	uninfected	gd T cells	cells/ul blood	40.3765
18_7	18	uninfected	gd T cells	cells/ul blood	45.9096
19_1	19	infected	gd T cells	cells/ul blood	1470.99
19_2	19	infected	gd T cells	cells/ul blood	984.212
19_3	19	infected	gd T cells	cells/ul blood	1821.12
19_4	19	infected	gd T cells	cells/ul blood	1674.17
19_5	19	infected	gd T cells	cells/ul blood	55.1574
19_6	19	uninfected	gd T cells	cells/ul blood	27.1997
19_7	19	uninfected	gd T cells	cells/ul blood	23.6162
20_1	20	infected	gd T cells	cells/ul blood	247.436
20_2	20	infected	gd T cells	cells/ul blood	290.85
20_3	20	infected	gd T cells	cells/ul blood	430.701
20_4	20	infected	gd T cells	cells/ul blood	741.239
20_5	20	infected	gd T cells	cells/ul blood	476.308
20_6	20	uninfected	gd T cells	cells/ul blood	33.4149
20_7	20	uninfected	gd T cells	cells/ul blood	68.3123
21_1	21	infected	gd T cells	cells/ul blood	305.378
21_2	21	infected	gd T cells	cells/ul blood	117.57
21_3	21	infected	gd T cells	cells/ul blood	221.142
21_4	21	infected	gd T cells	cells/ul blood	315.401
21_5	21	infected	gd T cells	cells/ul blood	334.922
21_6	21	uninfected	gd T cells	cells/ul blood	17.1482
21_7	21	uninfected	gd T cells	cells/ul blood	18.8237
22_1	22	infected	gd T cells	cells/ul blood	186.814
22_2	22	infected	gd T cells	cells/ul blood	112.103
22_3	22	infected	gd T cells	cells/ul blood	190.554
22_4	22	infected	gd T cells	cells/ul blood	148.819
22_5	22	infected	gd T cells	cells/ul blood	254.81
22_6	22	uninfected	gd T cells	cells/ul blood	23.3813
22_7	22	uninfected	gd T cells	cells/ul blood	55.8811
23_1	23	infected	gd T cells	cells/ul blood	235.834
23_2	23	infected	gd T cells	cells/ul blood	166.927
23_3	23	infected	gd T cells	cells/ul blood	175.339
23_4	23	infected	gd T cells	cells/ul blood	104.754
23_5	23	infected	gd T cells	cells/ul blood	71.3369
23_6	23	uninfected	gd T cells	cells/ul blood	119.832
23_7	23	uninfected	gd T cells	cells/ul blood	53.769
24_1	24	infected	gd T cells	cells/ul blood	80.5015
24_2	24	infected	gd T cells	cells/ul blood	82.544
24_3	24	infected	gd T cells	cells/ul blood	88.5242
24_4	24	infected	gd T cells	cells/ul blood	113.873
24_5	24	infected	gd T cells	cells/ul blood	145.858
24_6	24	uninfected	gd T cells	cells/ul blood	48.7526
24_7	24	uninfected	gd T cells	cells/ul blood	49.1076
25_1	25	infected	gd T cells	cells/ul blood	63.9388
25_2	25	infected	gd T cells	cells/ul blood	72.1501
25_3	25	infected	gd T cells	cells/ul blood	75.2175
25_4	25	infected	gd T cells	cells/ul blood	69.3246
25_5	25	infected	gd T cells	cells/ul blood	68.0287
25_6	25	uninfected	gd T cells	cells/ul blood	39.2864
25_7	25	uninfected	gd T cells	cells/ul blood	47.119
30_1	30	infected	gd T cells	cells/ul blood	75.1353
30_2	30	infected	gd T cells	cells/ul blood	233.892
30_3	30	infected	gd T cells	cells/ul blood	129.793
30_4	30	infected	gd T cells	cells/ul blood	779.81
30_5	30	infected	gd T cells	cells/ul blood	40.3075
30_6	30	uninfected	gd T cells	cells/ul blood	43.9041
30_7	30	uninfected	gd T cells	cells/ul blood	46.5992
45_1	45	infected	gd T cells	cells/ul blood	79.922
45_2	45	infected	gd T cells	cells/ul blood	639.475
45_3	45	infected	gd T cells	cells/ul blood	69.8477
45_4	45	infected	gd T cells	cells/ul blood	44.0019
45_6	45	uninfected	gd T cells	cells/ul blood	31.9535
45_7	45	uninfected	gd T cells	cells/ul blood	65.6461
60_1	60	infected	gd T cells	cells/ul blood	31.0734
60_2	60	infected	gd T cells	cells/ul blood	32.8173
60_3	60	infected	gd T cells	cells/ul blood	39.5328
60_4	60	infected	gd T cells	cells/ul blood	40.704
60_5	60	infected	gd T cells	cells/ul blood	34.5189
60_6	60	uninfected	gd T cells	cells/ul blood	55.2681
60_7	60	uninfected	gd T cells	cells/ul blood	37.2135
0_1	0	uninfected	IFNg		0.925926
0_2	0	uninfected	IFNg		0.962963
0_3	0	uninfected	IFNg		1
0_4	0	uninfected	IFNg		1.44444
0_5	0	uninfected	IFNg		1.03704
1_1	1	infected	IFNg		2.01852
1_2	1	infected	IFNg		1.24074
1_3	1	infected	IFNg		1.31481
1_4	1	infected	IFNg		0.925926
1_5	1	infected	IFNg		1.48148
2_1	2	infected	IFNg		0.944444
2_2	2	infected	IFNg		1.96296
2_3	2	infected	IFNg		2
2_4	2	infected	IFNg		1.03704
2_5	2	infected	IFNg		1.2963
3_1	3	infected	IFNg		1.25926
3_2	3	infected	IFNg		0.925926
3_3	3	infected	IFNg		2.66667
3_4	3	infected	IFNg		1.12963
3_5	3	infected	IFNg		1.48148
4_1	4	infected	IFNg		26.1111
4_2	4	infected	IFNg		16.6852
4_3	4	infected	IFNg		8.96296
4_4	4	infected	IFNg		51.8889
4_5	4	infected	IFNg		50.2963
5_1	5	infected	IFNg		34.1481
5_2	5	infected	IFNg		32.9259
5_3	5	infected	IFNg		118.926
5_4	5	infected	IFNg		149.667
5_5	5	infected	IFNg		126.481
5_6	5	uninfected	IFNg		1.74074
5_7	5	uninfected	IFNg		0.777778
6_1	6	infected	IFNg		166.537
6_2	6	infected	IFNg		240.37
6_3	6	infected	IFNg		149.667
6_4	6	infected	IFNg		160.185
6_5	6	infected	IFNg		193.148
7_1	7	infected	IFNg		68.4259
7_2	7	infected	IFNg		41.3333
7_3	7	infected	IFNg		58.5
7_4	7	infected	IFNg		72.6296
7_5	7	infected	IFNg		36.8519
8_1	8	infected	IFNg		33.8889
8_2	8	infected	IFNg		27.7593
8_3	8	infected	IFNg		32.3333
8_4	8	infected	IFNg		207
8_5	8	infected	IFNg		74.0741
8_6	8	uninfected	IFNg		0.925926
8_7	8	uninfected	IFNg		2.22222
9_1	9	infected	IFNg		3.88889
9_2	9	infected	IFNg		19.537
9_3	9	infected	IFNg		9.03704
9_4	9	infected	IFNg		7.88889
9_5	9	infected	IFNg		4.37037
10_1	10	infected	IFNg		2.2963
10_2	10	infected	IFNg		6.59259
10_3	10	infected	IFNg		3.51852
10_4	10	infected	IFNg		2.07407
10_5	10	infected	IFNg		2.22222
10_6	10	uninfected	IFNg		1.7037
10_7	10	uninfected	IFNg		0.703704
11_1	11	infected	IFNg		6.14815
11_2	11	infected	IFNg		3.33333
11_3	11	infected	IFNg		3.25926
11_4	11	infected	IFNg		68.3519
11_5	11	infected	IFNg		1.83333
12_1	12	infected	IFNg		2.64815
12_2	12	infected	IFNg		4.16667
12_3	12	infected	IFNg		5.2963
12_4	12	infected	IFNg		2.55556
12_5	12	infected	IFNg		8.40741
12_6	12	uninfected	IFNg		0.740741
12_7	12	uninfected	IFNg		1.03704
13_1	13	infected	IFNg		2.2037
13_2	13	infected	IFNg		3.88889
13_3	13	infected	IFNg		2.88889
13_4	13	infected	IFNg		4.05556
13_5	13	infected	IFNg		2.66667
14_1	14	infected	IFNg		5.33333
14_2	14	infected	IFNg		3.77778
14_3	14	infected	IFNg		3.62963
14_4	14	infected	IFNg		4.74367
14_5	14	infected	IFNg		17.3216
15_1	15	infected	IFNg		6.97176
15_2	15	infected	IFNg		10.8889
15_3	15	infected	IFNg		7.51082
15_4	15	infected	IFNg		12.5061
15_5	15	infected	IFNg		5.67803
15_6	15	uninfected	IFNg		1.86872
15_7	15	uninfected	IFNg		1.94059
16_1	16	infected	IFNg		25.7308
16_2	16	infected	IFNg		22.7121
16_3	16	infected	IFNg		29.8276
16_4	16	infected	IFNg		11.9311
16_5	16	infected	IFNg		13.9435
17_1	17	infected	IFNg		15.6685
17_2	17	infected	IFNg		21.5262
17_3	17	infected	IFNg		6.89989
17_4	17	infected	IFNg		15.956
17_5	17	infected	IFNg		13.7279
18_1	18	infected	IFNg		3.7015
18_2	18	infected	IFNg		3.09058
18_3	18	infected	IFNg		2.22809
18_4	18	infected	IFNg		2.91089
18_5	18	infected	IFNg		6.97176
19_1	19	infected	IFNg		3.12651
19_2	19	infected	IFNg		7.47488
19_3	19	infected	IFNg		12.4701
19_4	19	infected	IFNg		9.19985
19_5	19	infected	IFNg		9.6311
19_6	19	uninfected	IFNg		2.73121
19_7	19	uninfected	IFNg		4.88742
20_1	20	infected	IFNg		1.94059
20_2	20	infected	IFNg		2.22809
20_3	20	infected	IFNg		2.6234
20_4	20	infected	IFNg		2.08434
20_5	20	infected	IFNg		1.3656
21_1	21	infected	IFNg		3.62963
21_2	21	infected	IFNg		2.19215
21_3	21	infected	IFNg		3.09058
21_4	21	infected	IFNg		5.46241
21_5	21	infected	IFNg		2.15622
22_1	22	infected	IFNg		2.19215
22_2	22	infected	IFNg		3.23432
22_3	22	infected	IFNg		4.70774
22_4	22	infected	IFNg		2.80308
22_5	22	infected	IFNg		2.37184
23_1	23	infected	IFNg		1.72497
23_2	23	infected	IFNg		2.87495
23_3	23	infected	IFNg		5.03117
23_4	23	infected	IFNg		2.80308
23_5	23	infected	IFNg		1.40154
24_1	24	infected	IFNg		1.94059
24_2	24	infected	IFNg		5.46241
24_3	24	infected	IFNg		4.24056
24_4	24	infected	IFNg		2.73121
24_5	24	infected	IFNg		4.24056
25_1	25	infected	IFNg		2.08434
25_2	25	infected	IFNg		1.14998
25_3	25	infected	IFNg		1.58122
25_4	25	infected	IFNg		33.4213
25_5	25	infected	IFNg		1.72497
25_6	25	uninfected	IFNg		2.44371
25_7	25	uninfected	IFNg		1.47341
0_1	0	uninfected	IL-10		0.915663
0_2	0	uninfected	IL-10		1
0_3	0	uninfected	IL-10		0.807229
0_4	0	uninfected	IL-10		1.04217
0_5	0	uninfected	IL-10		1.10843
1_1	1	infected	IL-10		1
1_2	1	infected	IL-10		0.933735
1_3	1	infected	IL-10		0.903614
1_4	1	infected	IL-10		0.915663
1_5	1	infected	IL-10		0.915663
2_1	2	infected	IL-10		0.987952
2_2	2	infected	IL-10		0.987952
2_3	2	infected	IL-10		0.927711
2_4	2	infected	IL-10		0.903614
2_5	2	infected	IL-10		0.96988
3_1	3	infected	IL-10		0.656627
3_2	3	infected	IL-10		0.96988
3_3	3	infected	IL-10		2.08434
3_4	3	infected	IL-10		0.771084
3_5	3	infected	IL-10		0.951807
4_1	4	infected	IL-10		1.21687
4_2	4	infected	IL-10		1.06627
4_3	4	infected	IL-10		1.13253
4_4	4	infected	IL-10		1.12048
4_5	4	infected	IL-10		1.0241
5_1	5	infected	IL-10		1.96386
5_2	5	infected	IL-10		1.06024
5_3	5	infected	IL-10		1
5_4	5	infected	IL-10		1.68675
5_5	5	infected	IL-10		1.40964
5_6	5	uninfected	IL-10		1.09639
5_7	5	uninfected	IL-10		0.86747
6_1	6	infected	IL-10		2.75301
6_2	6	infected	IL-10		1.45783
6_3	6	infected	IL-10		2.66265
6_4	6	infected	IL-10		4.36145
6_5	6	infected	IL-10		2.57831
7_1	7	infected	IL-10		3.04819
7_2	7	infected	IL-10		2.72892
7_3	7	infected	IL-10		2.70482
7_4	7	infected	IL-10		2.18675
7_5	7	infected	IL-10		3.55422
8_1	8	infected	IL-10		4.22289
8_2	8	infected	IL-10		13.5542
8_3	8	infected	IL-10		7.6988
8_4	8	infected	IL-10		35.5904
8_5	8	infected	IL-10		30.3614
8_6	8	uninfected	IL-10		1.16265
8_7	8	uninfected	IL-10		1.09639
9_1	9	infected	IL-10		7.38554
9_2	9	infected	IL-10		7.36145
9_3	9	infected	IL-10		4.74096
9_4	9	infected	IL-10		7.12048
9_5	9	infected	IL-10		3.54217
10_1	10	infected	IL-10		2.88554
10_2	10	infected	IL-10		7.09639
10_3	10	infected	IL-10		3.83133
10_4	10	infected	IL-10		1.3253
10_5	10	infected	IL-10		4.46988
10_6	10	uninfected	IL-10		16.5361
10_7	10	uninfected	IL-10		0.819277
11_1	11	infected	IL-10		2.74096
11_2	11	infected	IL-10		3.45783
11_3	11	infected	IL-10		1.74096
11_4	11	infected	IL-10		4.95783
11_5	11	infected	IL-10		1.04217
12_1	12	infected	IL-10		2.13253
12_2	12	infected	IL-10		1.96386
12_3	12	infected	IL-10		2.56627
12_4	12	infected	IL-10		2.27108
12_5	12	infected	IL-10		2.55422
12_6	12	uninfected	IL-10		0.807229
12_7	12	uninfected	IL-10		0.76506
13_1	13	infected	IL-10		1.36145
13_2	13	infected	IL-10		2.68675
13_3	13	infected	IL-10		2.16867
13_4	13	infected	IL-10		2.85542
13_5	13	infected	IL-10		1.39759
14_1	14	infected	IL-10		2.46988
14_2	14	infected	IL-10		2.43373
14_3	14	infected	IL-10		0.759036
14_4	14	infected	IL-10		2.80459
14_5	14	infected	IL-10		3.03415
15_1	15	infected	IL-10		3.17388
15_2	15	infected	IL-10		3.13396
15_3	15	infected	IL-10		3.71284
15_4	15	infected	IL-10		3.28367
15_5	15	infected	IL-10		4.09211
15_6	15	uninfected	IL-10		1.51707
15_7	15	uninfected	IL-10		1.12782
16_1	16	infected	IL-10		3.93242
16_2	16	infected	IL-10		2.20575
16_3	16	infected	IL-10		2.28559
16_4	16	infected	IL-10		3.83261
16_5	16	infected	IL-10		2.49519
17_1	17	infected	IL-10		2.32552
17_2	17	infected	IL-10		2.28559
17_3	17	infected	IL-10		2.1758
17_4	17	infected	IL-10		2.595
17_5	17	infected	IL-10		2.77465
18_1	18	infected	IL-10		1.41727
18_2	18	infected	IL-10		1.23761
18_3	18	infected	IL-10		2.20575
18_4	18	infected	IL-10		1.71669
18_5	18	infected	IL-10		4.93049
19_1	19	infected	IL-10		1.49711
19_2	19	infected	IL-10		1.61688
19_3	19	infected	IL-10		1.99615
19_4	19	infected	IL-10		4.49134
19_5	19	infected	IL-10		4.09211
19_6	19	uninfected	IL-10		1.09788
19_7	19	uninfected	IL-10		1.53704
20_1	20	infected	IL-10		1.28752
20_2	20	infected	IL-10		1.45719
20_3	20	infected	IL-10		1.17773
20_4	20	infected	IL-10		1.33742
20_5	20	infected	IL-10		1.39731
21_1	21	infected	IL-10		2.09596
21_2	21	infected	IL-10		1.19769
21_3	21	infected	IL-10		1.72667
21_4	21	infected	IL-10		2.3355
21_5	21	infected	IL-10		1.49711
22_1	22	infected	IL-10		2.39538
22_2	22	infected	IL-10		1.84644
22_3	22	infected	IL-10		1.97619
22_4	22	infected	IL-10		0.758537
22_5	22	infected	IL-10		1.46717
23_1	23	infected	IL-10		1.11784
23_2	23	infected	IL-10		1.17773
23_3	23	infected	IL-10		1.23761
23_4	23	infected	IL-10		1.40729
23_5	23	infected	IL-10		1.47715
24_1	24	infected	IL-10		1.15777
24_2	24	infected	IL-10		1.68675
24_3	24	infected	IL-10		1.77657
24_4	24	infected	IL-10		1.13781
24_5	24	infected	IL-10		1.47715
25_1	25	infected	IL-10		1.038
25_2	25	infected	IL-10		1.61688
25_3	25	infected	IL-10		1.27754
25_4	25	infected	IL-10		5.07022
25_5	25	infected	IL-10		1.39731
25_6	25	uninfected	IL-10		1.13781
25_7	25	uninfected	IL-10		1.16775
0_1	0	uninfected	IL-12p70		0.892857
0_2	0	uninfected	IL-12p70		1
0_3	0	uninfected	IL-12p70		1.07143
0_4	0	uninfected	IL-12p70		1.08929
0_5	0	uninfected	IL-12p70		0.803571
1_1	1	infected	IL-12p70		1.14286
1_2	1	infected	IL-12p70		1.03571
1_3	1	infected	IL-12p70		0.910714
1_4	1	infected	IL-12p70		0.75
1_5	1	infected	IL-12p70		1
2_1	2	infected	IL-12p70		0.892857
2_2	2	infected	IL-12p70		0.839286
2_3	2	infected	IL-12p70		1.16071
2_4	2	infected	IL-12p70		0.928571
2_5	2	infected	IL-12p70		1.125
3_1	3	infected	IL-12p70		0.892857
3_2	3	infected	IL-12p70		1.03571
3_3	3	infected	IL-12p70		1.71429
3_4	3	infected	IL-12p70		0.75
3_5	3	infected	IL-12p70		1.14286
4_1	4	infected	IL-12p70		9.25
4_2	4	infected	IL-12p70		15.1071
4_3	4	infected	IL-12p70		8.42857
4_4	4	infected	IL-12p70		24.9286
4_5	4	infected	IL-12p70		13.2857
5_1	5	infected	IL-12p70		1.53571
5_2	5	infected	IL-12p70		6.60714
5_3	5	infected	IL-12p70		4.73214
5_4	5	infected	IL-12p70		2.21429
5_5	5	infected	IL-12p70		1.80357
5_6	5	uninfected	IL-12p70		1.03571
5_7	5	uninfected	IL-12p70		0.767857
6_1	6	infected	IL-12p70		1.32143
6_2	6	infected	IL-12p70		2.89286
6_3	6	infected	IL-12p70		1.42857
6_4	6	infected	IL-12p70		1.75
6_5	6	infected	IL-12p70		2.07143
7_1	7	infected	IL-12p70		3.60714
7_2	7	infected	IL-12p70		2.48214
7_3	7	infected	IL-12p70		2.07143
7_4	7	infected	IL-12p70		1.33929
7_5	7	infected	IL-12p70		2.14286
8_1	8	infected	IL-12p70		1.125
8_2	8	infected	IL-12p70		1.57143
8_3	8	infected	IL-12p70		1.42857
8_4	8	infected	IL-12p70		2.07143
8_5	8	infected	IL-12p70		1.42857
8_6	8	uninfected	IL-12p70		1.14286
8_7	8	uninfected	IL-12p70		1.07143
9_1	9	infected	IL-12p70		1.16071
9_2	9	infected	IL-12p70		2.64286
9_3	9	infected	IL-12p70		1.16071
9_4	9	infected	IL-12p70		1.19643
9_5	9	infected	IL-12p70		1.39286
10_1	10	infected	IL-12p70		1.03571
10_2	10	infected	IL-12p70		1.03571
10_3	10	infected	IL-12p70		1
10_4	10	infected	IL-12p70		0.946429
10_5	10	infected	IL-12p70		2.39286
10_6	10	uninfected	IL-12p70		0.982143
10_7	10	uninfected	IL-12p70		0.785714
11_1	11	infected	IL-12p70		1.14286
11_2	11	infected	IL-12p70		0.982143
11_3	11	infected	IL-12p70		1.25
11_4	11	infected	IL-12p70		1.46429
11_5	11	infected	IL-12p70		0.928571
12_1	12	infected	IL-12p70		1.53571
12_2	12	infected	IL-12p70		1.85714
12_3	12	infected	IL-12p70		1.42857
12_4	12	infected	IL-12p70		1.42857
12_5	12	infected	IL-12p70		1.21429
12_6	12	uninfected	IL-12p70		0.928571
12_7	12	uninfected	IL-12p70		1.14286
13_1	13	infected	IL-12p70		1.21429
13_2	13	infected	IL-12p70		2.39286
13_3	13	infected	IL-12p70		0.928571
13_4	13	infected	IL-12p70		1.67857
13_5	13	infected	IL-12p70		0.785714
14_1	14	infected	IL-12p70		2.03571
14_2	14	infected	IL-12p70		1.42857
14_3	14	infected	IL-12p70		1.07143
14_4	14	infected	IL-12p70		1.81857
14_5	14	infected	IL-12p70		1.72286
15_1	15	infected	IL-12p70		1.48357
15_2	15	infected	IL-12p70		1.34
15_3	15	infected	IL-12p70		1.48357
15_4	15	infected	IL-12p70		1.62714
15_5	15	infected	IL-12p70		1.48357
15_6	15	uninfected	IL-12p70		1.19643
15_7	15	uninfected	IL-12p70		1.29214
16_1	16	infected	IL-12p70		1.29214
16_2	16	infected	IL-12p70		1.38786
16_3	16	infected	IL-12p70		1.24429
16_4	16	infected	IL-12p70		1.53143
16_5	16	infected	IL-12p70		1.81857
17_1	17	infected	IL-12p70		1.53143
17_2	17	infected	IL-12p70		1.29214
17_3	17	infected	IL-12p70		1.14857
17_4	17	infected	IL-12p70		1.31607
17_5	17	infected	IL-12p70		1.1725
18_1	18	infected	IL-12p70		2.36893
18_2	18	infected	IL-12p70		1.005
18_3	18	infected	IL-12p70		1.14857
18_4	18	infected	IL-12p70		1.12464
18_5	18	infected	IL-12p70		2.44071
19_1	19	infected	IL-12p70		1.005
19_2	19	infected	IL-12p70		1.10071
19_3	19	infected	IL-12p70		1.22036
19_4	19	infected	IL-12p70		2.63214
19_5	19	infected	IL-12p70		1.77071
19_6	19	uninfected	IL-12p70		1.29214
19_7	19	uninfected	IL-12p70		0.813571
20_1	20	infected	IL-12p70		0.67
20_2	20	infected	IL-12p70		1.12464
20_3	20	infected	IL-12p70		1.10071
20_4	20	infected	IL-12p70		1.10071
20_5	20	infected	IL-12p70		1.19643
21_1	21	infected	IL-12p70		1.34
21_2	21	infected	IL-12p70		1.05286
21_3	21	infected	IL-12p70		0.765714
21_4	21	infected	IL-12p70		1.86643
21_5	21	infected	IL-12p70		1.10071
22_1	22	infected	IL-12p70		0.813571
22_2	22	infected	IL-12p70		1.05286
22_3	22	infected	IL-12p70		1.19643
22_4	22	infected	IL-12p70		0.933214
22_5	22	infected	IL-12p70		1.05286
23_1	23	infected	IL-12p70		1.19643
23_2	23	infected	IL-12p70		1.34
23_3	23	infected	IL-12p70		0.957143
23_4	23	infected	IL-12p70		7.56143
23_5	23	infected	IL-12p70		1.005
24_1	24	infected	IL-12p70		1.05286
24_2	24	infected	IL-12p70		1.43571
24_3	24	infected	IL-12p70		0.765714
24_4	24	infected	IL-12p70		1.14857
24_5	24	infected	IL-12p70		1.02893
25_1	25	infected	IL-12p70		1.19643
25_2	25	infected	IL-12p70		0.885357
25_3	25	infected	IL-12p70		1.12464
25_4	25	infected	IL-12p70		0.8375
25_5	25	infected	IL-12p70		0.981071
25_6	25	uninfected	IL-12p70		0.885357
25_7	25	uninfected	IL-12p70		1.10071
0_6	0	uninfected	neutrophils	cells/ul blood	245.718
0_7	0	uninfected	neutrophils	cells/ul blood	161.45
1_1	1	infected	neutrophils	cells/ul blood	238.895
1_2	1	infected	neutrophils	cells/ul blood	384.133
1_3	1	infected	neutrophils	cells/ul blood	358.531
1_4	1	infected	neutrophils	cells/ul blood	205.231
1_5	1	infected	neutrophils	cells/ul blood	322.62
1_6	1	uninfected	neutrophils	cells/ul blood	189.162
1_7	1	uninfected	neutrophils	cells/ul blood	267.082
2_1	2	infected	neutrophils	cells/ul blood	162.845
2_2	2	infected	neutrophils	cells/ul blood	146.357
2_3	2	infected	neutrophils	cells/ul blood	395.605
2_4	2	infected	neutrophils	cells/ul blood	263.75
2_5	2	infected	neutrophils	cells/ul blood	298.355
2_6	2	uninfected	neutrophils	cells/ul blood	853.341
2_7	2	uninfected	neutrophils	cells/ul blood	221.19
3_1	3	infected	neutrophils	cells/ul blood	296.11
3_2	3	infected	neutrophils	cells/ul blood	212.373
3_3	3	infected	neutrophils	cells/ul blood	210.638
3_4	3	infected	neutrophils	cells/ul blood	516.649
3_5	3	infected	neutrophils	cells/ul blood	543.93
3_6	3	uninfected	neutrophils	cells/ul blood	411.041
3_7	3	uninfected	neutrophils	cells/ul blood	355.893
4_1	4	infected	neutrophils	cells/ul blood	379.144
4_2	4	infected	neutrophils	cells/ul blood	316.684
4_3	4	infected	neutrophils	cells/ul blood	129.372
4_4	4	infected	neutrophils	cells/ul blood	252.262
4_5	4	infected	neutrophils	cells/ul blood	702.489
4_6	4	uninfected	neutrophils	cells/ul blood	521.522
4_7	4	uninfected	neutrophils	cells/ul blood	455.396
5_1	5	infected	neutrophils	cells/ul blood	204.36
5_2	5	infected	neutrophils	cells/ul blood	254.752
5_3	5	infected	neutrophils	cells/ul blood	289.036
5_4	5	infected	neutrophils	cells/ul blood	272.989
5_5	5	infected	neutrophils	cells/ul blood	189.19
5_6	5	uninfected	neutrophils	cells/ul blood	660.058
5_7	5	uninfected	neutrophils	cells/ul blood	472.484
6_1	6	infected	neutrophils	cells/ul blood	324.342
6_2	6	infected	neutrophils	cells/ul blood	281.108
6_3	6	infected	neutrophils	cells/ul blood	191.263
6_4	6	infected	neutrophils	cells/ul blood	255.797
6_5	6	infected	neutrophils	cells/ul blood	723.738
6_6	6	uninfected	neutrophils	cells/ul blood	224.041
6_7	6	uninfected	neutrophils	cells/ul blood	578.379
7_1	7	infected	neutrophils	cells/ul blood	639.498
7_2	7	infected	neutrophils	cells/ul blood	826.233
7_3	7	infected	neutrophils	cells/ul blood	402.93
7_4	7	infected	neutrophils	cells/ul blood	470.967
7_5	7	infected	neutrophils	cells/ul blood	759.515
7_6	7	uninfected	neutrophils	cells/ul blood	268.24
7_7	7	uninfected	neutrophils	cells/ul blood	235.74
8_1	8	infected	neutrophils	cells/ul blood	1160.81
8_2	8	infected	neutrophils	cells/ul blood	985.593
8_3	8	infected	neutrophils	cells/ul blood	786.48
8_4	8	infected	neutrophils	cells/ul blood	872.377
8_5	8	infected	neutrophils	cells/ul blood	768.844
8_6	8	uninfected	neutrophils	cells/ul blood	180.268
8_7	8	uninfected	neutrophils	cells/ul blood	172.335
9_1	9	infected	neutrophils	cells/ul blood	2288.09
9_2	9	infected	neutrophils	cells/ul blood	396.561
9_3	9	infected	neutrophils	cells/ul blood	1714.13
9_4	9	infected	neutrophils	cells/ul blood	2213.13
9_5	9	infected	neutrophils	cells/ul blood	1934.11
9_6	9	uninfected	neutrophils	cells/ul blood	270.877
9_7	9	uninfected	neutrophils	cells/ul blood	759.751
10_1	10	infected	neutrophils	cells/ul blood	2274.19
10_2	10	infected	neutrophils	cells/ul blood	1699.56
10_3	10	infected	neutrophils	cells/ul blood	3020.31
10_4	10	infected	neutrophils	cells/ul blood	1054.28
10_5	10	infected	neutrophils	cells/ul blood	3404.39
10_6	10	uninfected	neutrophils	cells/ul blood	330.819
10_7	10	uninfected	neutrophils	cells/ul blood	417.74
11_1	11	infected	neutrophils	cells/ul blood	1329.35
11_2	11	infected	neutrophils	cells/ul blood	1371.5
11_3	11	infected	neutrophils	cells/ul blood	445.867
11_4	11	infected	neutrophils	cells/ul blood	384.692
11_5	11	infected	neutrophils	cells/ul blood	2183.6
11_6	11	uninfected	neutrophils	cells/ul blood	246.632
11_7	11	uninfected	neutrophils	cells/ul blood	126.12
12_1	12	infected	neutrophils	cells/ul blood	1860.28
12_2	12	infected	neutrophils	cells/ul blood	946.077
12_3	12	infected	neutrophils	cells/ul blood	1760.86
12_4	12	infected	neutrophils	cells/ul blood	816.905
12_5	12	infected	neutrophils	cells/ul blood	949.588
12_6	12	uninfected	neutrophils	cells/ul blood	530.713
12_7	12	uninfected	neutrophils	cells/ul blood	650.384
13_1	13	infected	neutrophils	cells/ul blood	1102.23
13_2	13	infected	neutrophils	cells/ul blood	988.441
13_3	13	infected	neutrophils	cells/ul blood	1225.27
13_4	13	infected	neutrophils	cells/ul blood	934.97
13_5	13	infected	neutrophils	cells/ul blood	652.981
13_6	13	uninfected	neutrophils	cells/ul blood	184.828
13_7	13	uninfected	neutrophils	cells/ul blood	528.102
14_1	14	infected	neutrophils	cells/ul blood	1062.86
14_2	14	infected	neutrophils	cells/ul blood	772.091
14_3	14	infected	neutrophils	cells/ul blood	1024.48
14_4	14	infected	neutrophils	cells/ul blood	632.053
14_5	14	infected	neutrophils	cells/ul blood	478.128
14_6	14	uninfected	neutrophils	cells/ul blood	191.736
14_7	14	uninfected	neutrophils	cells/ul blood	137.933
15_1	15	infected	neutrophils	cells/ul blood	562.512
15_2	15	infected	neutrophils	cells/ul blood	701.622
15_3	15	infected	neutrophils	cells/ul blood	1609.07
15_4	15	infected	neutrophils	cells/ul blood	586.109
15_5	15	infected	neutrophils	cells/ul blood	558.926
15_6	15	uninfected	neutrophils	cells/ul blood	230.397
15_7	15	uninfected	neutrophils	cells/ul blood	263.281
16_1	16	infected	neutrophils	cells/ul blood	391.322
16_2	16	infected	neutrophils	cells/ul blood	430.416
16_3	16	infected	neutrophils	cells/ul blood	640.999
16_4	16	infected	neutrophils	cells/ul blood	803.14
16_5	16	infected	neutrophils	cells/ul blood	439.282
16_6	16	uninfected	neutrophils	cells/ul blood	338.742
16_7	16	uninfected	neutrophils	cells/ul blood	214.112
17_1	17	infected	neutrophils	cells/ul blood	276.561
17_2	17	infected	neutrophils	cells/ul blood	458.115
17_3	17	infected	neutrophils	cells/ul blood	361.419
17_4	17	infected	neutrophils	cells/ul blood	593.324
17_5	17	infected	neutrophils	cells/ul blood	1454.87
17_6	17	uninfected	neutrophils	cells/ul blood	345.593
17_7	17	uninfected	neutrophils	cells/ul blood	308.872
18_1	18	infected	neutrophils	cells/ul blood	433.612
18_2	18	infected	neutrophils	cells/ul blood	884.29
18_3	18	infected	neutrophils	cells/ul blood	438.933
18_4	18	infected	neutrophils	cells/ul blood	396.094
18_5	18	infected	neutrophils	cells/ul blood	1256.72
18_6	18	uninfected	neutrophils	cells/ul blood	406.14
18_7	18	uninfected	neutrophils	cells/ul blood	4.37234
19_1	19	infected	neutrophils	cells/ul blood	438.639
19_2	19	infected	neutrophils	cells/ul blood	466.206
19_3	19	infected	neutrophils	cells/ul blood	279.501
19_4	19	infected	neutrophils	cells/ul blood	334.358
19_5	19	infected	neutrophils	cells/ul blood	373.038
19_6	19	uninfected	neutrophils	cells/ul blood	686.269
19_7	19	uninfected	neutrophils	cells/ul blood	468.387
20_1	20	infected	neutrophils	cells/ul blood	515.154
20_2	20	infected	neutrophils	cells/ul blood	366.323
20_3	20	infected	neutrophils	cells/ul blood	390.502
20_4	20	infected	neutrophils	cells/ul blood	93.0241
20_5	20	infected	neutrophils	cells/ul blood	224.254
20_6	20	uninfected	neutrophils	cells/ul blood	26.7319
20_7	20	uninfected	neutrophils	cells/ul blood	529.421
21_1	21	infected	neutrophils	cells/ul blood	970.595
21_2	21	infected	neutrophils	cells/ul blood	450.686
21_3	21	infected	neutrophils	cells/ul blood	375.384
21_4	21	infected	neutrophils	cells/ul blood	253.98
21_5	21	infected	neutrophils	cells/ul blood	160.1
21_6	21	uninfected	neutrophils	cells/ul blood	154.334
21_7	21	uninfected	neutrophils	cells/ul blood	119.217
22_1	22	infected	neutrophils	cells/ul blood	338.485
22_2	22	infected	neutrophils	cells/ul blood	307.807
22_3	22	infected	neutrophils	cells/ul blood	432.047
22_4	22	infected	neutrophils	cells/ul blood	343.275
22_5	22	infected	neutrophils	cells/ul blood	437.609
22_6	22	uninfected	neutrophils	cells/ul blood	208.306
22_7	22	uninfected	neutrophils	cells/ul blood	357.24
23_1	23	infected	neutrophils	cells/ul blood	337.633
23_2	23	infected	neutrophils	cells/ul blood	317.765
23_3	23	infected	neutrophils	cells/ul blood	592.006
23_4	23	infected	neutrophils	cells/ul blood	519.494
23_5	23	infected	neutrophils	cells/ul blood	337.404
23_6	23	uninfected	neutrophils	cells/ul blood	314.276
23_7	23	uninfected	neutrophils	cells/ul blood	172.061
24_1	24	infected	neutrophils	cells/ul blood	282.787
24_2	24	infected	neutrophils	cells/ul blood	234.933
24_3	24	infected	neutrophils	cells/ul blood	261.806
24_4	24	infected	neutrophils	cells/ul blood	511.311
24_5	24	infected	neutrophils	cells/ul blood	295.712
24_6	24	uninfected	neutrophils	cells/ul blood	351.018
24_7	24	uninfected	neutrophils	cells/ul blood	428.576
25_1	25	infected	neutrophils	cells/ul blood	585.439
25_2	25	infected	neutrophils	cells/ul blood	356.627
25_3	25	infected	neutrophils	cells/ul blood	238.816
25_4	25	infected	neutrophils	cells/ul blood	273.22
25_5	25	infected	neutrophils	cells/ul blood	518.219
25_6	25	uninfected	neutrophils	cells/ul blood	303.952
25_7	25	uninfected	neutrophils	cells/ul blood	282.714
30_1	30	infected	neutrophils	cells/ul blood	298.871
30_2	30	infected	neutrophils	cells/ul blood	159.157
30_3	30	infected	neutrophils	cells/ul blood	674.559
30_4	30	infected	neutrophils	cells/ul blood	185.143
30_5	30	infected	neutrophils	cells/ul blood	543.191
30_6	30	uninfected	neutrophils	cells/ul blood	480.75
30_7	30	uninfected	neutrophils	cells/ul blood	332.019
45_1	45	infected	neutrophils	cells/ul blood	286.779
45_2	45	infected	neutrophils	cells/ul blood	474.784
45_3	45	infected	neutrophils	cells/ul blood	580.124
45_4	45	infected	neutrophils	cells/ul blood	71.5031
45_6	45	uninfected	neutrophils	cells/ul blood	79.8837
45_7	45	uninfected	neutrophils	cells/ul blood	780.03
60_1	60	infected	neutrophils	cells/ul blood	277.441
60_2	60	infected	neutrophils	cells/ul blood	242.848
60_3	60	infected	neutrophils	cells/ul blood	289.214
60_4	60	infected	neutrophils	cells/ul blood	122.112
60_5	60	infected	neutrophils	cells/ul blood	196.326
60_6	60	uninfected	neutrophils	cells/ul blood	195.564
60_7	60	uninfected	neutrophils	cells/ul blood	111.641
0_6	0	uninfected	NK cells	cells/ul blood	321.856
0_7	0	uninfected	NK cells	cells/ul blood	273.069
1_1	1	infected	NK cells	cells/ul blood	248.451
1_2	1	infected	NK cells	cells/ul blood	257.892
1_3	1	infected	NK cells	cells/ul blood	249.782
1_4	1	infected	NK cells	cells/ul blood	186.402
1_5	1	infected	NK cells	cells/ul blood	366.936
1_6	1	uninfected	NK cells	cells/ul blood	225.944
1_7	1	uninfected	NK cells	cells/ul blood	296.757
2_1	2	infected	NK cells	cells/ul blood	141.771
2_2	2	infected	NK cells	cells/ul blood	368.254
2_3	2	infected	NK cells	cells/ul blood	181.319
2_4	2	infected	NK cells	cells/ul blood	157.865
2_5	2	infected	NK cells	cells/ul blood	280.804
2_6	2	uninfected	NK cells	cells/ul blood	302.798
2_7	2	uninfected	NK cells	cells/ul blood	258.055
3_1	3	infected	NK cells	cells/ul blood	285.61
3_2	3	infected	NK cells	cells/ul blood	217.865
3_3	3	infected	NK cells	cells/ul blood	245.744
3_4	3	infected	NK cells	cells/ul blood	332.004
3_5	3	infected	NK cells	cells/ul blood	366.067
3_6	3	uninfected	NK cells	cells/ul blood	290.563
3_7	3	uninfected	NK cells	cells/ul blood	328.931
4_1	4	infected	NK cells	cells/ul blood	211.362
4_2	4	infected	NK cells	cells/ul blood	268.302
4_3	4	infected	NK cells	cells/ul blood	127.216
4_4	4	infected	NK cells	cells/ul blood	115.067
4_5	4	infected	NK cells	cells/ul blood	321.719
4_6	4	uninfected	NK cells	cells/ul blood	285.855
4_7	4	uninfected	NK cells	cells/ul blood	318.356
5_1	5	infected	NK cells	cells/ul blood	784.076
5_2	5	infected	NK cells	cells/ul blood	297.211
5_3	5	infected	NK cells	cells/ul blood	369.885
5_4	5	infected	NK cells	cells/ul blood	753.284
5_5	5	infected	NK cells	cells/ul blood	510.175
5_6	5	uninfected	NK cells	cells/ul blood	323.682
5_7	5	uninfected	NK cells	cells/ul blood	197.736
6_1	6	infected	NK cells	cells/ul blood	1137.98
6_2	6	infected	NK cells	cells/ul blood	590.767
6_3	6	infected	NK cells	cells/ul blood	1089.84
6_4	6	infected	NK cells	cells/ul blood	645.933
6_5	6	infected	NK cells	cells/ul blood	612.689
6_6	6	uninfected	NK cells	cells/ul blood	320.358
6_7	6	uninfected	NK cells	cells/ul blood	576.093
7_1	7	infected	NK cells	cells/ul blood	1041.59
7_2	7	infected	NK cells	cells/ul blood	679.573
7_3	7	infected	NK cells	cells/ul blood	660.264
7_4	7	infected	NK cells	cells/ul blood	654.964
7_5	7	infected	NK cells	cells/ul blood	1196.35
7_6	7	uninfected	NK cells	cells/ul blood	191.02
7_7	7	uninfected	NK cells	cells/ul blood	241.999
8_1	8	infected	NK cells	cells/ul blood	514.46
8_2	8	infected	NK cells	cells/ul blood	685.793
8_3	8	infected	NK cells	cells/ul blood	768.692
8_4	8	infected	NK cells	cells/ul blood	416.888
8_5	8	infected	NK cells	cells/ul blood	672.856
8_6	8	uninfected	NK cells	cells/ul blood	188.752
8_7	8	uninfected	NK cells	cells/ul blood	438.879
9_1	9	infected	NK cells	cells/ul blood	394.732
9_2	9	infected	NK cells	cells/ul blood	218.278
9_3	9	infected	NK cells	cells/ul blood	327.426
9_4	9	infected	NK cells	cells/ul blood	361.949
9_5	9	infected	NK cells	cells/ul blood	506.437
9_6	9	uninfected	NK cells	cells/ul blood	216.265
9_7	9	uninfected	NK cells	cells/ul blood	292.524
10_1	10	infected	NK cells	cells/ul blood	273.332
10_2	10	infected	NK cells	cells/ul blood	216.674
10_3	10	infected	NK cells	cells/ul blood	432.664
10_4	10	infected	NK cells	cells/ul blood	250.285
10_5	10	infected	NK cells	cells/ul blood	406.01
10_6	10	uninfected	NK cells	cells/ul blood	322.113
10_7	10	uninfected	NK cells	cells/ul blood	454.6
11_1	11	infected	NK cells	cells/ul blood	424.343
11_2	11	infected	NK cells	cells/ul blood	254.931
11_3	11	infected	NK cells	cells/ul blood	171.122
11_4	11	infected	NK cells	cells/ul blood	851.608
11_5	11	infected	NK cells	cells/ul blood	310.215
11_6	11	uninfected	NK cells	cells/ul blood	261.776
11_7	11	uninfected	NK cells	cells/ul blood	319.505
12_1	12	infected	NK cells	cells/ul blood	371.181
12_2	12	infected	NK cells	cells/ul blood	344.203
12_3	12	infected	NK cells	cells/ul blood	377.661
12_4	12	infected	NK cells	cells/ul blood	530.016
12_5	12	infected	NK cells	cells/ul blood	561.234
12_6	12	uninfected	NK cells	cells/ul blood	358.02
12_7	12	uninfected	NK cells	cells/ul blood	391.227
13_1	13	infected	NK cells	cells/ul blood	370.313
13_2	13	infected	NK cells	cells/ul blood	356.512
13_3	13	infected	NK cells	cells/ul blood	607.81
13_4	13	infected	NK cells	cells/ul blood	345.363
13_5	13	infected	NK cells	cells/ul blood	395.746
13_6	13	uninfected	NK cells	cells/ul blood	208.469
13_7	13	uninfected	NK cells	cells/ul blood	307.123
14_1	14	infected	NK cells	cells/ul blood	405.135
14_2	14	infected	NK cells	cells/ul blood	319.274
14_3	14	infected	NK cells	cells/ul blood	261.013
14_4	14	infected	NK cells	cells/ul blood	287.445
14_5	14	infected	NK cells	cells/ul blood	547.967
14_6	14	uninfected	NK cells	cells/ul blood	225.29
14_7	14	uninfected	NK cells	cells/ul blood	374.39
15_1	15	infected	NK cells	cells/ul blood	352.663
15_2	15	infected	NK cells	cells/ul blood	331.404
15_3	15	infected	NK cells	cells/ul blood	456.749
15_4	15	infected	NK cells	cells/ul blood	542.793
15_5	15	infected	NK cells	cells/ul blood	453.283
15_6	15	uninfected	NK cells	cells/ul blood	232.349
15_7	15	uninfected	NK cells	cells/ul blood	310.962
16_1	16	infected	NK cells	cells/ul blood	352.19
16_2	16	infected	NK cells	cells/ul blood	538.02
16_3	16	infected	NK cells	cells/ul blood	394.873
16_4	16	infected	NK cells	cells/ul blood	371.199
16_5	16	infected	NK cells	cells/ul blood	386.153
16_6	16	uninfected	NK cells	cells/ul blood	254.64
16_7	16	uninfected	NK cells	cells/ul blood	212.073
17_1	17	infected	NK cells	cells/ul blood	390.439
17_2	17	infected	NK cells	cells/ul blood	297.952
17_3	17	infected	NK cells	cells/ul blood	406.426
17_4	17	infected	NK cells	cells/ul blood	357.834
17_5	17	infected	NK cells	cells/ul blood	298.517
17_6	17	uninfected	NK cells	cells/ul blood	210.158
17_7	17	uninfected	NK cells	cells/ul blood	114.013
18_1	18	infected	NK cells	cells/ul blood	251.28
18_2	18	infected	NK cells	cells/ul blood	347.216
18_3	18	infected	NK cells	cells/ul blood	225.444
18_4	18	infected	NK cells	cells/ul blood	325.001
18_5	18	infected	NK cells	cells/ul blood	126.872
18_6	18	uninfected	NK cells	cells/ul blood	337.262
18_7	18	uninfected	NK cells	cells/ul blood	535.612
19_1	19	infected	NK cells	cells/ul blood	329.348
19_2	19	infected	NK cells	cells/ul blood	336.129
19_3	19	infected	NK cells	cells/ul blood	584.114
19_4	19	infected	NK cells	cells/ul blood	298.661
19_5	19	infected	NK cells	cells/ul blood	364.329
19_6	19	uninfected	NK cells	cells/ul blood	271.997
19_7	19	uninfected	NK cells	cells/ul blood	261.746
20_1	20	infected	NK cells	cells/ul blood	277.859
20_2	20	infected	NK cells	cells/ul blood	200.649
20_3	20	infected	NK cells	cells/ul blood	292.876
20_4	20	infected	NK cells	cells/ul blood	203.767
20_5	20	infected	NK cells	cells/ul blood	207.574
20_6	20	uninfected	NK cells	cells/ul blood	258.408
20_7	20	uninfected	NK cells	cells/ul blood	324.484
21_1	21	infected	NK cells	cells/ul blood	149.771
21_2	21	infected	NK cells	cells/ul blood	154.583
21_3	21	infected	NK cells	cells/ul blood	224.859
21_4	21	infected	NK cells	cells/ul blood	200.86
21_5	21	infected	NK cells	cells/ul blood	196.905
21_6	21	uninfected	NK cells	cells/ul blood	225.07
21_7	21	uninfected	NK cells	cells/ul blood	227.976
22_1	22	infected	NK cells	cells/ul blood	125.776
22_2	22	infected	NK cells	cells/ul blood	142.503
22_3	22	infected	NK cells	cells/ul blood	194.327
22_4	22	infected	NK cells	cells/ul blood	158.74
22_5	22	infected	NK cells	cells/ul blood	212.342
22_6	22	uninfected	NK cells	cells/ul blood	231.688
22_7	22	uninfected	NK cells	cells/ul blood	361.231
23_1	23	infected	NK cells	cells/ul blood	173.058
23_2	23	infected	NK cells	cells/ul blood	160.893
23_3	23	infected	NK cells	cells/ul blood	154.6
23_4	23	infected	NK cells	cells/ul blood	153.924
23_5	23	infected	NK cells	cells/ul blood	148.458
23_6	23	uninfected	NK cells	cells/ul blood	203.488
23_7	23	uninfected	NK cells	cells/ul blood	339.82
24_1	24	infected	NK cells	cells/ul blood	150.682
24_2	24	infected	NK cells	cells/ul blood	129.107
24_3	24	infected	NK cells	cells/ul blood	135.612
24_4	24	infected	NK cells	cells/ul blood	131.735
24_5	24	infected	NK cells	cells/ul blood	161.842
24_6	24	uninfected	NK cells	cells/ul blood	358.331
24_7	24	uninfected	NK cells	cells/ul blood	321.432
25_1	25	infected	NK cells	cells/ul blood	185.822
25_2	25	infected	NK cells	cells/ul blood	123.686
25_3	25	infected	NK cells	cells/ul blood	144.794
25_4	25	infected	NK cells	cells/ul blood	154.961
25_5	25	infected	NK cells	cells/ul blood	116.049
25_6	25	uninfected	NK cells	cells/ul blood	467.301
25_7	25	uninfected	NK cells	cells/ul blood	331.975
30_1	30	infected	NK cells	cells/ul blood	166.967
30_2	30	infected	NK cells	cells/ul blood	202.061
30_3	30	infected	NK cells	cells/ul blood	299.804
30_4	30	infected	NK cells	cells/ul blood	186.37
30_5	30	infected	NK cells	cells/ul blood	103.648
30_6	30	uninfected	NK cells	cells/ul blood	230.497
30_7	30	uninfected	NK cells	cells/ul blood	184.455
45_1	45	infected	NK cells	cells/ul blood	277.376
45_2	45	infected	NK cells	cells/ul blood	195.849
45_3	45	infected	NK cells	cells/ul blood	97.0106
45_4	45	infected	NK cells	cells/ul blood	139.339
45_6	45	uninfected	NK cells	cells/ul blood	201.706
45_7	45	uninfected	NK cells	cells/ul blood	349.469
60_1	60	infected	NK cells	cells/ul blood	153.148
60_2	60	infected	NK cells	cells/ul blood	207.843
60_3	60	infected	NK cells	cells/ul blood	151.889
60_4	60	infected	NK cells	cells/ul blood	130.253
60_5	60	infected	NK cells	cells/ul blood	135.918
60_6	60	uninfected	NK cells	cells/ul blood	295.472
60_7	60	uninfected	NK cells	cells/ul blood	231.551
0_1	0	uninfected	TNFa		0.972222
0_2	0	uninfected	TNFa		1
0_3	0	uninfected	TNFa		1.16667
0_4	0	uninfected	TNFa		0.722222
0_5	0	uninfected	TNFa		1.05556
1_1	1	infected	TNFa		1.05556
1_2	1	infected	TNFa		1.08333
1_3	1	infected	TNFa		0.972222
1_4	1	infected	TNFa		0.805556
1_5	1	infected	TNFa		0.944444
2_1	2	infected	TNFa		0.944444
2_2	2	infected	TNFa		0.944444
2_3	2	infected	TNFa		1.41667
2_4	2	infected	TNFa		1.08333
2_5	2	infected	TNFa		1.02778
3_1	3	infected	TNFa		0.833333
3_2	3	infected	TNFa		0.75
3_3	3	infected	TNFa		3.41667
3_4	3	infected	TNFa		0.902778
3_5	3	infected	TNFa		1.05556
4_1	4	infected	TNFa		1.41667
4_2	4	infected	TNFa		1.44444
4_3	4	infected	TNFa		1.16667
4_4	4	infected	TNFa		1.55556
4_5	4	infected	TNFa		1.55556
5_1	5	infected	TNFa		1.125
5_2	5	infected	TNFa		1.13889
5_3	5	infected	TNFa		1.54167
5_4	5	infected	TNFa		2.52778
5_5	5	infected	TNFa		2.91667
5_6	5	uninfected	TNFa		1.41667
5_7	5	uninfected	TNFa		0.958333
6_1	6	infected	TNFa		3.41667
6_2	6	infected	TNFa		4.16667
6_3	6	infected	TNFa		2.90278
6_4	6	infected	TNFa		3.23611
6_5	6	infected	TNFa		4.65278
7_1	7	infected	TNFa		6.05556
7_2	7	infected	TNFa		4.25
7_3	7	infected	TNFa		4.05556
7_4	7	infected	TNFa		3.25
7_5	7	infected	TNFa		3.33333
8_1	8	infected	TNFa		2.72222
8_2	8	infected	TNFa		7.59722
8_3	8	infected	TNFa		5.30556
8_4	8	infected	TNFa		18.5556
8_5	8	infected	TNFa		10
8_6	8	uninfected	TNFa		1.11111
8_7	8	uninfected	TNFa		1.13889
9_1	9	infected	TNFa		2.30556
9_2	9	infected	TNFa		4.63889
9_3	9	infected	TNFa		4.22222
9_4	9	infected	TNFa		4.61111
9_5	9	infected	TNFa		2.47222
10_1	10	infected	TNFa		1.83333
10_2	10	infected	TNFa		2.86111
10_3	10	infected	TNFa		1.58333
10_4	10	infected	TNFa		2.22222
10_5	10	infected	TNFa		3.33333
10_6	10	uninfected	TNFa		1.06944
10_7	10	uninfected	TNFa		1.16667
11_1	11	infected	TNFa		3.22222
11_2	11	infected	TNFa		2.76389
11_3	11	infected	TNFa		1.66667
11_4	11	infected	TNFa		4
11_5	11	infected	TNFa		1.02778
12_1	12	infected	TNFa		2.04167
12_2	12	infected	TNFa		4.08333
12_3	12	infected	TNFa		1.69444
12_4	12	infected	TNFa		1.05556
12_5	12	infected	TNFa		3.27778
12_6	12	uninfected	TNFa		0.638889
12_7	12	uninfected	TNFa		0.833333
13_1	13	infected	TNFa		1.38889
13_2	13	infected	TNFa		2.05556
13_3	13	infected	TNFa		1.52778
13_4	13	infected	TNFa		3.61111
13_5	13	infected	TNFa		1.55556
14_1	14	infected	TNFa		2.97222
14_2	14	infected	TNFa		2.77778
14_3	14	infected	TNFa		0.916667
14_4	14	infected	TNFa		2.65583
14_5	14	infected	TNFa		3.30081
15_1	15	infected	TNFa		2.3523
15_2	15	infected	TNFa		2.23848
15_3	15	infected	TNFa		2.92141
15_4	15	infected	TNFa		2.80759
15_5	15	infected	TNFa		2.20054
15_6	15	uninfected	TNFa		0.834688
15_7	15	uninfected	TNFa		1.10027
16_1	16	infected	TNFa		2.57995
16_2	16	infected	TNFa		1.5935
16_3	16	infected	TNFa		1.47967
16_4	16	infected	TNFa		4.3252
16_5	16	infected	TNFa		3.35772
17_1	17	infected	TNFa		1.74526
17_2	17	infected	TNFa		2.44715
17_3	17	infected	TNFa		2.31436
17_4	17	infected	TNFa		2.23848
17_5	17	infected	TNFa		2.1626
18_1	18	infected	TNFa		1.55556
18_2	18	infected	TNFa		1.04336
18_3	18	infected	TNFa		1.13821
18_4	18	infected	TNFa		2.46612
18_5	18	infected	TNFa		2.01084
19_1	19	infected	TNFa		1.85908
19_2	19	infected	TNFa		1.70732
19_3	19	infected	TNFa		2.54201
19_4	19	infected	TNFa		2.63686
19_5	19	infected	TNFa		2.82656
19_6	19	uninfected	TNFa		1.68835
19_7	19	uninfected	TNFa		1.5935
20_1	20	infected	TNFa		1.25203
20_2	20	infected	TNFa		1.11924
20_3	20	infected	TNFa		1.25203
20_4	20	infected	TNFa		1.04336
20_5	20	infected	TNFa		0.910569
21_1	21	infected	TNFa		2.40921
21_2	21	infected	TNFa		0.98645
21_3	21	infected	TNFa		1.32791
21_4	21	infected	TNFa		2.57995
21_5	21	infected	TNFa		1.02439
22_1	22	infected	TNFa		1.17615
22_2	22	infected	TNFa		0.834688
22_3	22	infected	TNFa		1.5935
22_4	22	infected	TNFa		1.32791
22_5	22	infected	TNFa		1.25203
23_1	23	infected	TNFa		1.10027
23_2	23	infected	TNFa		5.04607
23_3	23	infected	TNFa		1.36585
23_4	23	infected	TNFa		1.30894
23_5	23	infected	TNFa		0.929539
24_1	24	infected	TNFa		0.796748
24_2	24	infected	TNFa		2.54201
24_3	24	infected	TNFa		1.36585
24_4	24	infected	TNFa		1.25203
24_5	24	infected	TNFa		0.701897
25_1	25	infected	TNFa		1.02439
25_2	25	infected	TNFa		1.10027
25_3	25	infected	TNFa		0.910569
25_4	25	infected	TNFa		1.91599
25_5	25	infected	TNFa		1.17615
25_6	25	uninfected	TNFa		1.25203
25_7	25	uninfected	TNFa		0.948509

## Sheet: 1D
metabolite	super.pathway	SUB.PATHWAY	0	1	2	3	4	5	6	7	8	9	10	11	12	13	14	15	16	17	18	19	20	21	22	23	24	25
N-acetylaspartate (NAA)	Amino Acid	Alanine and Aspartate Metabolism	0	-0.215293	-0.0593528	-0.171402	-0.27588	-0.119031	-0.307155	-0.395971	-0.941574	-0.92014	-1.10321	-0.737496	-0.562593	-0.407674	-0.321275	-0.338548	-0.664395	-0.272446	-0.360981	-0.47933	-0.59877	-0.117182	-0.437663	-0.366534	-0.497974	-0.667097
alanine	Amino Acid	Alanine and Aspartate Metabolism	0	-0.0133931	0.00628563	-0.153013	-0.157581	-0.127823	-0.102437	0.383529	0.205552	0.805009	0.39081	0.749887	0.805009	0.323334	0.2397	-0.0141326	0.108338	-0.0386009	0.00701474	-0.134884	-0.108742	-0.142302	0.033593	-0.0983537	0.113493	0.0908369
asparagine	Amino Acid	Alanine and Aspartate Metabolism	0	-0.0413868	-0.248218	-0.465339	-0.291041	-0.224281	-0.0413868	0.478874	0.533804	0.84022	0.730903	1.07467	1.34153	0.853244	0.316706	0.419104	0.156139	0.0591171	-0.0567945	0.187536	0.16889	-0.0879477	-0.309955	-0.260245	-0.142897	-0.126377
aspartate	Amino Acid	Alanine and Aspartate Metabolism	0	-0.129868	-0.158003	-0.353819	-0.216354	0.17768	0.168208	0.567443	0.234777	0.0703737	-0.246634	0.370706	1.14396	0.724526	0.406222	0.326979	0.343516	0.43482	0.341184	0.574631	-0.0420038	0.206867	0.211698	0.0677114	-0.0423421	0.185357
guanidinoacetate	Amino Acid	Creatine Metabolism	0	0.302653	0.0828718	-0.190738	-0.648979	-0.215567	-0.062272	-0.451678	-0.694192	-1.43446	-1.21315	-0.72468	-0.158077	0.705483	0.0849724	-0.15575	-0.0393544	-0.144632	0.103223	0.119966	0.334894	0.160867	0.405404	0.0895567	-0.152498	0.0828718
carboxyethyl-GABA	Amino Acid	Glutamate Metabolism	0	0.0367081	0.273687	0.0920611	-0.114663	-0.497903	-0.790937	-0.601828	0.670122	-0.027377	-0.0414128	0.310246	-0.267912	0.104455	-0.00189665	-0.191666	0.0152284	-0.0748065	0.281025	-0.0751137	-0.239749	0.0994287	0.0209877	-0.589051	-0.189836	0.113109
glutamine	Amino Acid	Glutamate Metabolism	0	0.0634934	0.0611023	0.107878	0.0945338	0.101376	-0.011027	0.163326	0.197692	0.575835	0.483261	0.799152	0.731095	0.61331	0.286614	0.383062	0.268074	0.338345	0.384721	0.237906	0.108032	0.105714	0.172659	0.233241	0.150038	0.0854642
N-acetyl-aspartyl-glutamate (NAAG)	Amino Acid	Glutamate Metabolism	0	-0.439838	0.377543	0.506712	0.682435	0.886545	0.918445	1.38671	1.43799	1.33222	-0.439838	1.62551	1.71176	0.829979	-0.439838	-0.166555	-0.439838	-0.439838	-0.439838	-0.439838	-0.439838	-0.439838	-0.439838	-0.439838	-0.439838	-0.439838
cysteine-glutathione disulfide	Amino Acid	Glutathione Metabolism	0	0.0575132	0.403247	0.236666	-0.0958224	-0.0231308	-0.0229743	-0.01315	-0.936432	-0.799599	-1.18966	-0.366778	0.181378	0.0204901	-0.0401317	0.248122	-0.0185997	0.548258	0.190854	0.479563	0.490785	0.170336	0.656368	0.267059	0.457863	0.315879
glutathione, oxidized (GSSG)	Amino Acid	Glutathione Metabolism	0	-0.0803214	0.460713	0.595109	0.411361	1.15567	0.87639	0.887017	-0.743442	-0.976693	-1.30741	-0.36652	-0.429732	0.0149988	0.373472	0.615445	0.13914	0.607628	0.22675	0.595627	0.498209	0.662841	0.612502	0.754481	0.772246	0.683593
S-methylglutathione	Amino Acid	Glutathione Metabolism	0	-0.490502	0.464366	-0.0802592	-0.160273	0.461249	0.151188	-0.195802	-1.24113	-1.57404	-2.79013	-1.25203	-0.252378	0.543639	0.0393081	0.502404	0.309222	0.112523	0.410661	0.25464	-0.0684057	-0.108089	0.24029	0.102623	-0.416272	0.296251
5-oxoproline	Amino Acid	Glutathione Metabolism	0	-0.0149331	-0.0193876	-0.237295	-0.370136	-0.0143773	0.0259919	0.336454	0.254419	0.426137	0.607046	0.965664	1.06973	1.05991	0.794142	0.736745	0.66961	0.675709	0.696908	0.536344	0.339791	0.0901144	0.197337	0.491258	-0.084211	-0.0303971
ophthalmate	Amino Acid	Glutathione Metabolism	0	0.0812552	0.595341	0.390575	0.215546	1.31667	0.780911	0.947984	1.91613	2.38825	1.38789	-0.0601376	-0.907418	-1.04571	-1.86839	-1.08329	-2.18406	-0.821525	-0.344405	-0.896034	-0.618391	-1.61288	-0.739676	-0.0965925	0.135315	0.280145
dimethylglycine	Amino Acid	Glycine, Serine and Threonine Metabolism	0	-0.311914	-0.134267	-0.0619505	-0.393542	-0.257881	-0.407951	0.0754379	0.842056	0.954414	0.741187	0.372756	0.738697	0.685934	0.425954	0.529448	0.682915	0.664669	0.470024	0.703808	0.405956	0.379697	0.371685	0.149628	0.118047	0.0729693
glycine	Amino Acid	Glycine, Serine and Threonine Metabolism	0	0.1553	-0.0677497	-0.106537	0.0197023	-0.0556569	0.15388	0.402165	0.185562	0.3127	0.273152	0.727914	1.01736	0.91922	0.660764	0.524371	0.480125	0.357372	0.447155	0.503595	0.31171	0.190647	0.111772	0.201527	0.196174	0.214899
N-acetylserine	Amino Acid	Glycine, Serine and Threonine Metabolism	0	-0.247104	0.00182376	-0.0942589	-0.329042	0.089239	0.321806	0.834984	1.32051	1.02403	0.63498	1.06502	1.61089	1.33247	0.727526	0.774868	1.03397	1.23764	0.851485	1.42796	0.504705	0.289488	0.359593	0.079677	0.125193	0.257447
serine	Amino Acid	Glycine, Serine and Threonine Metabolism	0	-0.0414812	-0.104246	-0.148184	-0.202376	-0.260384	-0.137551	0.223475	0.103991	0.377856	0.383555	0.493725	0.723164	0.584436	0.470441	0.166236	0.121803	0.130194	0.0357086	0.144691	0.219683	0.194381	0.0551376	-0.0229156	0.148826	0.107073
threonine	Amino Acid	Glycine, Serine and Threonine Metabolism	0	-0.223757	-0.0814122	-0.454456	-0.0252163	-0.28281	0.186886	0.389708	0.17481	0.394583	0.347296	0.327393	0.900608	0.539517	0.218178	-0.0748153	-0.0596937	-0.0576791	-0.108908	0.0455479	-0.00312804	-0.00955431	-0.0870909	-0.052732	0.0719756	0.207006
4-guanidinobutanoate	Amino Acid	Guanidino and Acetamido Metabolism	0	0.564114	0.761694	0.548985	0.438774	0.444869	0.437373	0.773851	-2.31573	-4.52615	-2.63337	-0.674626	0.728975	1.171	0.583467	0.117228	0.44284	0.50809	0.267082	0.172146	-0.584445	-0.609491	0.494075	0.624882	-0.113911	-0.513785
1-methylhistamine	Amino Acid	Histidine Metabolism	0	-0.383267	0.291469	-0.190116	0.208261	0.202202	0.109445	-0.3481	-0.341856	-0.0438647	-0.627961	-0.264303	-0.144649	-0.0124718	-0.265235	-0.428336	-0.498238	-0.507586	-0.410689	-0.782476	-0.307833	-0.0859437	-0.0896555	-0.316505	-0.150954	-0.0296665
imidazole propionate	Amino Acid	Histidine Metabolism	0	0.0930777	-0.662584	-1.07628	0.213748	-0.00942941	-0.163778	0.1047	-1.13895	-3.18268	-2.03953	-0.983959	0.375117	0.118688	0.990826	-0.131281	0.233976	-0.4957	-0.837872	-0.842875	0.597902	-0.748527	-0.324184	-0.274332	0.147755	-0.428008
N-acetyl-1-methylhistidine*	Amino Acid	Histidine Metabolism	0	-0.878477	-0.185075	-0.279024	-0.936828	-0.65181	-1.63008	-0.289327	1.40891	1.86189	1.51955	0.883771	-2.19401	-2.19401	-2.19401	-2.19401	-2.19401	-1.6064	-0.402854	-0.565129	0.210022	-0.362783	-1.52215	-2.19401	-0.59001	-0.513063
N-acetyl-3-methylhistidine*	Amino Acid	Histidine Metabolism	0	0.000651771	0.274209	0.523364	0.140138	0.052805	0.103138	0.254944	1.32258	1.68359	1.31461	0.681003	-1.46838	-2.16634	-1.47516	-1.0154	-0.378772	0.0659432	0.221368	0.249745	0.629574	0.391293	0.169128	-0.0871675	-0.0314698	0.694863
1-methylhistidine	Amino Acid	Histidine Metabolism	0	-1.151	-0.153899	0.0646446	-0.303474	0.268765	0.569804	1.52655	2.5891	3.31989	2.88548	1.76103	0.5533	-0.869664	-0.864903	-0.433247	0.169693	0.451247	0.713815	0.940232	0.171393	-1.86332	-0.447174	-0.436304	-0.118525	0.490786
1-methylimidazoleacetate	Amino Acid	Histidine Metabolism	0	-0.016809	0.282763	-0.0577005	-0.190757	0.235034	0.286532	0.325743	0.718967	1.04386	1.03743	0.675591	0.768319	0.94726	0.432061	0.540832	0.305231	0.426743	0.378822	0.296285	0.430291	0.248082	0.025664	-0.332018	-0.381876	0.147552
3-methylhistidine	Amino Acid	Histidine Metabolism	0	-0.374763	-0.00457462	0.0684495	0.515189	0.466581	0.508783	0.571061	1.05284	1.86712	1.60873	0.895847	0.763138	0.657698	-0.118525	0.353628	0.572664	0.688583	0.594266	0.489252	0.262041	-0.184244	0.235299	-0.169429	0.303341	1.01383
2-hydroxy-3-methylvalerate	Amino Acid	Leucine, Isoleucine and Valine Metabolism	0	0.370517	0.596912	0.140082	0.191779	-0.485889	-0.132351	-1.35192	-1.08981	-0.269869	-0.396279	-0.837899	0.948986	1.65431	1.16344	-0.220922	-0.574136	-0.0798677	-0.0563716	0.233161	-0.454838	-0.313767	0.109184	-0.589384	-0.641829	-0.330409
3-methyl-2-oxobutyrate	Amino Acid	Leucine, Isoleucine and Valine Metabolism	0	-0.121952	0.0134711	0.0362261	-0.141855	-0.135973	0.0876304	-0.30417	0.139208	0.556507	-0.0239417	-0.616529	-1.1574	-0.892508	-0.45777	-0.475819	-0.561353	-0.320237	-0.339637	-0.524854	-0.409823	-0.442847	-0.659388	-0.619627	-0.483102	-0.237289
3-methyl-2-oxovalerate	Amino Acid	Leucine, Isoleucine and Valine Metabolism	0	-0.188163	0.11909	-0.228329	-0.0688133	-0.375539	0.0506952	-0.704751	-0.32023	0.404187	0.234978	-0.29992	-1.07949	-0.776048	-0.801849	-0.88132	-0.61463	-0.484357	-0.254147	-0.723949	-0.376841	-0.713495	-0.921493	-0.943614	-0.795065	-0.415706
4-methyl-2-oxopentanoate	Amino Acid	Leucine, Isoleucine and Valine Metabolism	0	0.1246	0.217907	-0.117586	-0.0597598	-0.349803	-0.0735632	-0.340752	-0.00869419	0.608206	0.00639777	-0.561291	-1.3104	-0.868012	-0.679165	-0.53473	-0.464889	-0.52701	-0.279658	-0.754487	-0.221463	-0.885016	-0.860663	-0.929102	-0.597664	-0.555346
N-acetylisoleucine	Amino Acid	Leucine, Isoleucine and Valine Metabolism	0	0.0786431	0.181954	0.465595	0.222069	-0.410139	-0.201896	-0.715934	-0.340556	-0.571788	-0.472603	-0.463791	-0.25496	-0.0365549	-0.0249867	-0.182329	-0.00198309	-0.00524694	0.482715	-0.227687	-0.297819	-0.0675187	0.121432	-0.0199546	0.113865	0.0540388
tigloylglycine	Amino Acid	Leucine, Isoleucine and Valine Metabolism	0	-0.728484	-0.041062	0.28879	0.25504	0.106839	-0.0344787	0.142378	0.310823	0.206077	-0.168006	-0.32467	-0.824593	-0.74496	-0.68466	-0.43143	0.0990011	0.330932	-0.0790866	0.0693837	-0.253659	-0.718776	-0.166056	-0.0733116	-0.595556	-0.49403
2-methylbutyrylcarnitine (C5)	Amino Acid	Leucine, Isoleucine and Valine Metabolism	0	-0.299152	-0.0560979	0.122872	-0.163347	-0.00303885	0.190438	0.565992	1.71617	2.35746	2.49705	1.76505	0.657362	0.642854	0.334321	0.212547	0.440193	0.437954	0.672678	0.75514	0.406951	0.583317	0.336426	0.0963194	0.19077	0.0838423
3-hydroxyisobutyrate	Amino Acid	Leucine, Isoleucine and Valine Metabolism	0	-0.424777	-0.0291543	-0.28119	-0.270066	-0.327212	-0.431569	-0.0416222	0.906502	0.673843	0.490889	-0.154637	-0.26477	0.0745311	-0.0909453	0.0459816	-0.0283621	0.418269	0.0633029	-0.134607	0.0507376	-0.239797	-0.390951	-0.655446	-0.464764	-0.315729
alpha-hydroxyisocaproate	Amino Acid	Leucine, Isoleucine and Valine Metabolism	0	0.0993287	0.247778	-0.0180917	-0.0762215	-0.62949	-0.232625	-0.654111	-0.597238	-0.141778	-0.377839	-0.348394	1.11333	1.48819	0.660962	-0.681439	-0.524921	-0.23582	0.0518298	-0.0957159	-0.736621	-0.347406	0.0689474	-0.572791	-0.77905	-0.432125
isobutyrylcarnitine (C4)	Amino Acid	Leucine, Isoleucine and Valine Metabolism	0	-0.552189	-0.205162	-0.162341	-0.323021	-0.382798	-0.155427	1.00754	2.15938	3.34606	2.34193	1.64461	1.21352	0.576743	0.533482	0.665197	0.991139	1.03766	1.00409	1.03277	0.422758	0.443532	0.121503	-0.107938	-0.0638654	-0.299518
methylsuccinate	Amino Acid	Leucine, Isoleucine and Valine Metabolism	0	0.182739	0.174529	0.000309691	0.66684	0.994725	1.52929	3.48444	3.16026	3.09651	2.76702	3.91566	3.26414	2.31684	2.23354	2.8447	2.76429	2.89682	1.04723	2.56991	0.884458	0.91566	0.274961	0.1051	0.159356	0.187098
N-acetylvaline	Amino Acid	Leucine, Isoleucine and Valine Metabolism	0	0.183553	0.817763	0.826939	0.551859	0.288012	0.42909	0.400743	0.864313	0.537356	0.329957	0.463459	0.746709	0.868707	0.457339	0.643199	0.819743	0.700692	1.16919	0.744382	0.337617	0.322585	0.662403	0.318309	0.313028	0.422208
2-oxoadipate	Amino Acid	Lysine Metabolism	0	-0.151825	-0.0858317	-0.121259	-0.0545815	-0.95819	-0.997507	-0.98793	0.212581	-0.151726	-1.16405	-0.975259	-2.11343	-0.809272	-0.763771	-1.15867	-1.28784	-1.12504	-0.689022	-0.985105	-1.0675	-0.931428	-1.1395	-0.953005	-0.694925	-0.84805
2-aminoadipate	Amino Acid	Lysine Metabolism	0	0.0172264	-0.114333	-0.278341	0.0407623	-0.475066	-0.436361	-0.330619	0.745777	0.66642	-0.886152	0.138685	-0.35242	0.0955443	-0.242753	-0.234138	-0.425016	-0.449486	-0.266678	-0.220949	-0.0632585	-0.246126	-0.340616	-0.534964	-0.539275	-0.708975
6-oxopiperidine-2-carboxylate	Amino Acid	Lysine Metabolism	0	0.836029	0.659384	0.927742	1.26582	0	0	0.90393	2.49638	1.46346	0	0.315737	0.883376	0.875898	0	0	0	0	0	0.450264	0.370194	0.185255	0.452728	0.0626402	0.532349	0.907677
glutarate (pentanedioate)	Amino Acid	Lysine Metabolism	0	-0.243781	-0.692301	-0.581359	-0.603293	-1.0369	-1.23001	-0.3151	1.19083	0.977254	-0.81652	-0.332737	-0.537302	0.0061727	0.028021	-0.50167	-0.428156	0.118066	0.26858	0.136628	-0.797878	-0.440851	0.0644092	-0.58737	-0.506219	-1.18192
glutarylcarnitine (C5-DC)	Amino Acid	Lysine Metabolism	0	-0.325927	-0.05439	-0.249772	-0.423435	-0.146583	-0.111501	0.416402	0.56323	1.11085	0.425071	0.423341	-0.0613531	-0.191086	-0.632917	-0.300989	-0.347824	-0.273337	0.0876556	-0.280283	-0.12901	0.0314625	0.0537296	-0.271853	-0.372531	0.00966018
lysine	Amino Acid	Lysine Metabolism	0	-0.30322	-0.0191618	-0.202243	-0.0500197	-0.370141	-0.273618	-0.0360519	0.454181	0.618397	0.416201	0.188445	0.0934517	0.0452943	-0.0443599	0.146625	-0.0844532	-0.109942	-0.118688	-0.134535	-0.183149	-0.169839	-0.304065	-0.341923	-0.196269	-0.0863421
N-trimethyl 5-aminovalerate	Amino Acid	Lysine Metabolism	0	-0.0687525	0.264632	-0.010717	0.0764777	0.261918	0.331739	0.39311	0.698935	0.863636	1.14657	0.581943	0.365984	0.234954	0.233415	0.347755	-0.126848	0.402177	0.209042	0.538622	0.43454	0.456335	0.216382	-0.0744578	0.186956	0.270345
N6,N6,N6-trimethyllysine	Amino Acid	Lysine Metabolism	0	-0.426116	0.209399	-0.116133	0.16032	0.0764131	-0.0939023	0.236047	0.661029	0.805655	0.650929	0.523872	0.483753	0.334785	0.309472	0.321965	0.188042	0.251188	0.355949	0.44558	0.39959	0.639584	0.616146	0.388733	0.582705	0.7784
N-acetylmethionine	Amino Acid	Methionine, Cysteine, SAM and Taurine Metabolism	0	-0.346613	0.167132	-0.254687	-0.224759	-0.24763	-0.295488	-0.0802069	-0.382389	-0.731704	-1.87319	-1.16696	-0.681797	-0.205056	-0.341153	-0.422966	-0.239096	-0.18999	0.0168765	-0.257603	-0.58828	-0.556811	-0.256353	-0.464236	-0.432192	-0.259133
N-acetyltaurine	Amino Acid	Methionine, Cysteine, SAM and Taurine Metabolism	0	-0.275894	0.691702	0.133918	0.629207	0.215959	0.511739	0.535926	0.129002	0.483183	0.0530223	-0.0751672	0.0485659	-0.00879742	-0.351228	0.153833	0.283507	0.293334	0.448874	0.277299	0.0546529	-0.0878668	-0.319199	-0.0862324	-0.703405	-0.0114316
methionine sulfone	Amino Acid	Methionine, Cysteine, SAM and Taurine Metabolism	0	0.0498028	0.314344	-0.0620872	0.077384	0.0526379	0.284809	0.28315	-0.516305	-0.0576855	-0.0841047	0.61967	1.35202	1.41657	0.752342	0.779335	0.663796	0.508686	0.696905	0.639369	0.5223	0.386764	0.409335	0.574398	0.489199	0.302632
methionine sulfoxide	Amino Acid	Methionine, Cysteine, SAM and Taurine Metabolism	0	0.107694	-0.146257	-0.367088	-0.285923	-0.463348	0.0233502	0.394837	-0.213568	0.0894625	-0.479868	-0.130773	0.888196	0.681602	0.32803	0.317472	0.0735914	-0.0712005	-0.145622	0.0679882	-0.175786	-0.327825	0.107295	0.291319	-0.00907132	-0.113433
S-methylmethionine	Amino Acid	Methionine, Cysteine, SAM and Taurine Metabolism	0	-0.401639	-0.619396	-0.239948	-0.988974	-0.404606	0.0271138	0.507647	-0.470844	-1.62423	-0.574605	0.041427	1.3503	1.49465	0.948153	1.25275	1.05322	1.0465	0.642048	0.803118	0.0702041	0.0215254	0.707715	-0.0996852	0.122799	0.191074
taurine	Amino Acid	Methionine, Cysteine, SAM and Taurine Metabolism	0	0.011622	0.23734	0.134504	0.256211	0.0857086	0.160556	0.566074	0.686484	1.06068	0.345421	0.149509	-0.00965123	0.255155	0.161261	0.0934149	-0.0520178	0.199939	0.0950398	0.00849017	-0.171424	-0.0357619	-0.15097	-0.235514	0.0250121	-0.0174509
phenylpyruvate	Amino Acid	Phenylalanine Metabolism	0	0.493834	0.225387	0.456949	0.1058	0.0406056	0.528253	0.513077	0.847268	0.400737	0.166423	-0.223398	-0.490235	-0.462681	-0.696233	-0.638946	-0.180555	-0.428389	0.224602	-0.686279	-0.784293	-0.808208	-0.529641	-0.308547	-0.728248	-0.507284
phenylalanine	Amino Acid	Phenylalanine Metabolism	0	-0.1913	-0.103083	-0.0487567	-0.0987738	-0.191458	-0.123919	0.0839701	0.623966	0.533432	0.368501	0.105638	-0.00610959	-0.0340694	-0.111292	-0.0436063	-0.0813704	-0.0223418	0.0952987	-0.105615	-0.231567	-0.128305	-0.102488	-0.0717271	-0.0319429	-0.202736
phenyllactate (PLA)	Amino Acid	Phenylalanine Metabolism	0	-0.454327	-0.157861	-0.320179	-0.510095	-0.491522	-0.44566	-0.293389	-0.306586	-0.393576	-0.249035	-0.49985	0.94952	1.41739	0.707482	-0.81649	-0.568106	-0.421433	-0.0120829	-0.551338	-1.16373	-0.818032	-0.456877	-0.853762	-0.555994	-1.36287
5-methylthioadenosine (MTA)	Amino Acid	Polyamine Metabolism	0	-0.173533	0.211917	0.142056	0.14973	0.445035	0.463197	1.33529	0.764814	0.466773	0.308677	0.822229	0.924606	0.826912	0.779154	0.833132	0.680464	0.635412	0.476598	0.649705	0.252265	0.429723	0.426935	0.466487	0.00236766	0.190447
N-acetylputrescine	Amino Acid	Polyamine Metabolism	0	0.102738	-0.0181168	-0.736088	0.000877952	0.237711	0.714708	1.20561	0.747117	0.952233	0.461327	1.2077	1.13439	1.04645	0.906466	0.857746	0.732127	0.696262	0.2586	0.822549	0.15711	0.0846317	-0.223747	0.607689	0.433472	0.382509
putrescine	Amino Acid	Polyamine Metabolism	0	-0.477723	-0.24613	-0.0832247	-0.277832	0.594435	0.549805	1.44993	1.92806	1.65396	1.30041	1.55078	1.1064	1.25161	1.06537	0.89101	1.26115	1.22989	0.887932	1.27343	0.908928	0.835008	0.644706	0.25693	0.516309	0.475879
spermidine	Amino Acid	Polyamine Metabolism	0	-0.483733	-0.143359	0.261209	-0.0729603	0.208098	-0.211839	-0.15432	-0.0457354	-0.171117	0.0990884	0.445304	1.33668	1.48633	1.27368	0.923135	0.850584	1.21503	1.31924	1.44647	1.40027	0.937586	0.418872	0.325314	-0.0249299	0.143398
5-hydroxyindoleacetate	Amino Acid	Tryptophan Metabolism	0	-0.464898	0.207028	0.0602564	-0.134054	0.0487746	0.0941636	-0.400227	-0.651787	-0.757357	-1.3489	-0.894918	-0.587665	-0.234895	-0.202692	-0.484752	-0.647023	-0.527568	-0.358093	-0.490272	-0.639118	-0.403497	-0.570691	-0.554244	-0.370256	-0.147199
indole-3-carboxylic acid	Amino Acid	Tryptophan Metabolism	0	0.0230262	0.0738259	0.13908	-0.208401	-0.13435	-0.293019	-0.44594	-0.640553	-1.59876	-1.23989	-0.868077	-0.374312	-0.0284818	-0.390416	-0.344377	-0.167182	-0.457717	-0.229753	-0.631825	-0.0875876	0.166135	-0.0132887	-0.344377	-0.265307	0.210812
indoleacetate	Amino Acid	Tryptophan Metabolism	0	-0.369369	-0.706404	-0.55246	-0.696396	-0.66936	-1.09375	-1.09954	-1.84386	-2.03547	-2.25067	-2.18399	-0.777434	-0.497285	-1.09202	-1.15509	-1.66057	-1.09983	-0.730554	-1.03991	-1.68667	-1.7095	-1.26572	-1.02855	-0.963667	-1.93377
indoleacetylglycine	Amino Acid	Tryptophan Metabolism	0	-1.0416	-0.233749	-1.0764	-0.65504	-0.628372	-1.52581	-1.06806	-3.20636	-3.91339	-4.2935	-2.39974	-1.54393	-0.622339	-1.34026	-1.34209	-1.62191	-1.51539	-1.03895	-1.18106	-1.63538	-1.58692	-1.48661	-1.37896	-0.896648	-1.83496
indolelactate	Amino Acid	Tryptophan Metabolism	0	0.111236	0.174971	0.0767693	-0.0556274	-0.13097	-0.0371391	-0.253379	0.170293	-0.289493	-0.13097	-0.594436	-0.313979	0.38524	-0.119868	-0.507147	-0.417451	-0.574212	-0.262618	-0.344171	-0.751963	-0.552827	-0.45865	-0.553547	-0.476795	-0.662291
N-formylanthranilic acid	Amino Acid	Tryptophan Metabolism	0	0.0216098	-0.392505	-0.00090747	-0.416762	-0.447855	-0.842944	-1.56577	-1.53022	-2.32356	-2.09283	-1.68935	-1.19525	0.124056	-0.712945	-1.21597	-1.04487	-1.13723	-0.280944	-0.590826	-0.738448	-0.611883	-0.613409	-0.599872	-0.503998	-0.614937
tryptophan	Amino Acid	Tryptophan Metabolism	0	-0.107843	-0.106084	-0.0643645	-0.0891444	0.00876869	-0.0951715	-0.463332	-0.326742	-0.608461	-0.629688	-0.333376	-0.264744	-0.260072	-0.262934	-0.232796	-0.315284	-0.26822	-0.0697612	-0.241385	-0.244657	-0.249428	-0.136561	-0.16544	-0.0418128	-0.263386
xanthurenate	Amino Acid	Tryptophan Metabolism	0	0.518338	0.457568	-0.671602	-0.866716	-0.977109	-0.212761	-0.500885	-0.321406	-2.02792	-3.28909	-1.49149	-0.873988	-0.174881	-0.717636	-0.85948	-0.634538	-0.258308	0.219776	-0.52401	-0.708181	-1.02245	-0.577176	-0.361349	-0.832309	-0.449323
C-glycosyltryptophan	Amino Acid	Tryptophan Metabolism	0	-0.312351	-0.0637421	-0.113144	-0.339978	-0.0838798	-0.0799019	0.465522	0.397247	0.838284	0.61912	0.618008	0.333464	0.135094	0.246569	0.471202	0.631083	0.784354	0.34575	0.73635	0.307472	0.250452	0.100458	-0.106692	-0.159902	-0.0422976
indolepropionate	Amino Acid	Tryptophan Metabolism	0	0.79446	1.17865	0.983771	0.546608	0.873392	0.566344	-0.0395477	-3.17901	-4.28819	-1.13704	-0.15141	1.55058	2.02441	1.65764	1.03702	0.950634	1.01041	0.480742	0.993717	0.397163	0.716056	1.04897	0.549784	0.282524	0.195776
kynurenate	Amino Acid	Tryptophan Metabolism	0	-0.433897	0.287291	-0.444396	-0.613153	-0.2967	-0.0156987	0.532819	0.594259	0.232953	-0.547055	-0.449675	-0.116769	-0.0507198	-0.260339	0.0100823	-0.190969	-0.231896	0.19472	-0.420628	-0.163009	-0.593607	-0.298081	-0.374072	-0.330698	-0.498249
kynurenine	Amino Acid	Tryptophan Metabolism	0	-0.0567628	0.326851	-0.246247	0.164686	1.11122	1.63934	1.86366	2.76248	2.44242	2.50627	2.00912	1.94003	2.09671	1.80981	1.85914	1.70703	1.61601	1.60278	1.48241	1.44777	1.10359	0.819154	1.32983	1.171	1.2043
N-acetylkynurenine (2)	Amino Acid	Tryptophan Metabolism	0	-0.107204	0.849368	0.306387	0.248605	0.848176	1.55851	1.58111	2.24204	2.38401	2.22681	1.72004	1.31967	1.57392	1.30563	1.33582	1.25952	1.19065	1.37442	0.948228	0.707523	0.265448	0.419057	0.430054	0.465275	0.813018
4-hydroxycinnamate sulfate	Amino Acid	Tyrosine Metabolism	0	0.155194	0.227362	-1.57834	-0.875045	-0.840467	0.384222	-0.629402	-2.10167	-3.1904	-0.988981	-0.0612923	0.729396	1.02032	0.0813171	-0.37262	-0.31627	-0.316442	0.536501	-1.05008	-1.24834	-2.9805	0.234313	0.077129	-0.235914	-0.302222
thyroxine	Amino Acid	Tyrosine Metabolism	0	0.0886844	0.477263	0.242694	0.234133	-0.393842	-0.773738	-2.34154	-1.86197	-2.62772	-2.62772	-1.57433	0.12499	0.12499	-0.136062	-0.117474	0.19862	0.15043	-0.287008	0.0236102	0.439357	0.480989	-0.102992	-0.309896	-0.791108	0.291839
p-cresol-glucuronide*	Amino Acid	Tyrosine Metabolism	0	0.000431149	-0.127819	1.14224	-0.13002	-0.660954	-1.28077	0.534004	4.48886	4.33654	3.60651	3.16413	0.371851	-0.0337386	0.117013	0.275628	-2.37791	-0.73462	-1.56342	-1.42422	-1.75777	-0.851393	-1.00908	-1.63126	0.148737	-1.25412
2-oxoarginine*	Amino Acid	Urea cycle; Arginine and Proline Metabolism	0	-0.189056	-0.0843922	-0.0853449	-0.241856	-0.3929	-0.27069	-0.348904	-0.884385	-1.18906	-1.51259	-1.07679	-0.602814	-0.420287	-0.478236	-0.613083	-0.660394	-0.350048	-0.327187	-0.357798	-0.402516	-0.244115	-0.211244	0.0873572	-0.231667	-0.585356
argininate*	Amino Acid	Urea cycle; Arginine and Proline Metabolism	0	0.213759	0.43881	-0.154799	-0.267665	-0.193277	0.350619	0.114807	-0.465032	-2.55236	-2.40325	-1.54203	0.0162039	0.112472	-0.053792	-0.0266453	-0.123362	0.175794	-0.179907	-0.191689	-0.563335	-0.686814	-0.389123	0.125962	-0.561656	-0.360136
arginine	Amino Acid	Urea cycle; Arginine and Proline Metabolism	0	-0.473017	-0.0277072	-0.241809	-0.00057184	-0.628905	-0.491546	-0.826839	-3.62167	-4.36569	-6.2222	-2.89942	-0.336668	0.116172	0.0732343	-0.158408	-0.554303	-0.554807	-0.249808	-0.333927	-0.466682	-0.235199	-0.241674	-0.402552	-0.261549	-0.399381
argininosuccinate	Amino Acid	Urea cycle; Arginine and Proline Metabolism	0	-0.165554	0.138603	-0.377572	-0.801286	-1.28819	-0.852776	-0.999413	-1.52129	-1.52129	-1.52129	-1.52129	-0.598896	0.144037	-0.00978662	-0.349751	-0.288045	0.292751	-0.0201166	0.0252774	-0.295958	-0.939589	-0.390299	-0.307691	-0.587903	-0.301596
N-acetylarginine	Amino Acid	Urea cycle; Arginine and Proline Metabolism	0	-0.0846674	-0.045749	0.2561	-0.0603737	-0.209808	-0.169321	-0.306414	-1.07103	-1.92832	-2.10853	-1.18511	0.153868	0.498772	0.00195655	-0.210865	-0.442933	-0.520946	-0.149496	-0.353332	-0.286696	-0.423022	-0.0932747	-0.0687	0.0598279	-0.0924395
N-acetylcitrulline	Amino Acid	Urea cycle; Arginine and Proline Metabolism	0	-0.257696	0.289475	0.210886	0.383321	0.239918	0.438755	-0.351106	-0.443972	-0.837203	-1.28375	-0.774672	-0.0528399	-0.151318	-0.64392	-1.20155	-0.653416	-0.720376	-0.414124	-0.507538	-0.800514	-0.581367	-0.500892	-0.526014	-0.217278	0.0497588
dimethylarginine (SDMA + ADMA)	Amino Acid	Urea cycle; Arginine and Proline Metabolism	0	-0.325562	-0.0762546	-0.0742685	0.191113	-0.00547728	0.0677567	0.379975	0.677035	1.01351	0.862958	1.00085	1.2753	0.859222	0.66353	0.896257	0.690998	0.723328	0.681038	0.901615	0.491983	0.378671	0.0995985	0.0427194	0.32791	0.17183
N-delta-acetylornithine	Amino Acid	Urea cycle; Arginine and Proline Metabolism	0	-0.240736	0.208104	0.00725367	0.0015676	-0.105885	0.144383	0.285834	-0.315774	-0.31276	-0.621861	-0.396619	-0.200365	-0.277422	-0.35481	-0.134398	0.426895	0.35391	0.91612	0.4066	0.285132	-0.0877391	0.470871	0.0240384	0.238637	0.472722
N-methylproline	Amino Acid	Urea cycle; Arginine and Proline Metabolism	0	-0.0434762	-0.0536053	0.466282	0.160543	0.228002	0.448996	0.313704	-0.577016	-0.166071	-0.446418	0.199807	0.79169	0.68205	0.612747	0.266185	0.288782	0.333995	0.127494	0.511931	0.0932028	0.0264813	0.0672953	0.424716	-0.0363088	0.235071
N-monomethylarginine	Amino Acid	Urea cycle; Arginine and Proline Metabolism	0	0.0136576	-0.121808	-0.0491924	0.245891	-0.177118	-0.262867	-0.0507516	-0.314375	-0.0210715	0.0873349	1.01034	1.38579	0.88192	0.795376	0.666352	0.269546	0.375509	0.385664	0.523948	-0.155149	0.30939	0.156381	-0.139764	0.26635	-0.157947
ornithine	Amino Acid	Urea cycle; Arginine and Proline Metabolism	0	-0.0994007	-0.305385	-0.293937	-0.411747	-0.310421	-0.0717996	0.408994	1.0602	1.28537	1.25227	1.15545	0.981279	0.696948	0.351158	0.302853	0.0852044	-0.0684434	-0.10283	0.122525	-0.204987	-0.380009	-0.0206364	0.0492825	-0.0501227	-0.287893
proline	Amino Acid	Urea cycle; Arginine and Proline Metabolism	0	-0.099098	-0.291678	-0.199768	-0.268661	-0.453015	-0.0709809	0.367297	0.0493133	0.661336	0.514231	0.641466	0.999073	0.787656	0.385849	0.24924	0.306482	0.000712407	-0.150689	0.00739189	-0.208305	-0.300427	-0.185111	-0.143588	0.195244	-0.176872
urea	Amino Acid	Urea cycle; Arginine and Proline Metabolism	0	-0.210936	-0.0520006	0.0130667	0.105355	-0.712823	-0.0968832	-0.278846	0.839467	0.679647	0.44739	-0.459155	-0.278688	-0.0270234	-0.425254	-0.571703	-0.195972	-0.186476	-0.0036435	0.0423882	-0.0518659	-0.215004	-0.211087	-0.0909191	-0.188104	-0.318326
erythronate*	Carbohydrate	Aminosugar Metabolism	0	-0.0374342	0.203908	0.0893636	0.285284	0.378541	0.238904	0.585604	0.710119	1.27879	1.02197	1.13249	0.790986	0.451713	0.551211	0.796758	0.739926	0.817874	0.691291	1.01703	0.531506	0.537088	0.376022	0.0687754	0.167699	0.177773
glucuronate	Carbohydrate	Aminosugar Metabolism	0	-0.00989127	0.0838909	-0.00669854	0.111836	0.142885	0.317812	0.398739	0.551895	1.10657	0.33288	0.503925	0.459295	0.173281	0.446846	0.653959	0.338176	0.505691	0.475968	0.747088	-0.0609139	0.14228	0.0536245	-0.391889	-0.141368	-0.122148
N-acetylglucosaminylasparagine	Carbohydrate	Aminosugar Metabolism	0	0.0435485	-0.040367	-0.150318	-0.170741	0.19089	-0.198554	0.338828	0.00748524	0.308587	-0.167073	0.617919	0.830819	0.399579	0.384785	0.32183	0.0459209	0.235778	0.222416	0.204688	0.366046	0.345649	0.0828971	0.300131	0.00602379	0.0856671
N-acetylneuraminate	Carbohydrate	Aminosugar Metabolism	0	-0.162637	0.00747415	-0.587775	-0.257985	0.0457276	0.373416	0.971622	0.314076	1.14538	0.508077	0.924233	0.891585	0.579143	0.642559	0.338283	0.437621	0.771067	0.376882	0.332939	0.558812	0.803093	0.712594	0.22984	0.18572	0.530039
mannitol/sorbitol	Carbohydrate	Fructose, Mannose and Galactose Metabolism	0	0.117674	0.276104	0.146722	0.180564	0.32657	0.0115039	0.00487822	-0.916715	-1.20576	-1.56234	-0.756795	-0.176846	-0.12975	0.00473064	-0.0136876	0.053345	0.13975	0.283179	0.0437523	0.114258	0.17821	0.204663	0.037562	-0.0250936	-0.03735
pyruvate	Carbohydrate	Glycolysis, Gluconeogenesis, and Pyruvate Metabolism	0	-0.257934	-0.230503	-0.147537	-0.382266	0.0638186	-0.221259	0.735126	1.05624	1.51909	1.25006	1.66115	1.33579	0.751486	0.360629	0.615816	0.898448	0.831751	0.428029	0.518318	-0.0654259	-0.0293377	-0.11413	0.364489	0.196614	0.126786
xylose	Carbohydrate	Pentose Metabolism	0	0.715264	0.655948	0.873845	0.435981	0.842142	0.279385	-0.157757	-2.41504	-3.03068	-1.67692	0.496792	1.97448	1.40711	1.70133	-0.115643	0.691516	0.756814	1.61288	0.70144	-0.685318	0.144485	0.334307	0.606604	0.152473	-0.837483
bilirubin (E,E)*	Cofactors/Vitamins	Hemoglobin and Porphyrin Metabolism	0	-0.799507	-0.799507	-0.799507	-0.799507	-0.799507	-0.799507	0.192098	3.33775	4.36143	3.43982	2.44473	2.47807	2.80848	2.56249	2.99068	3.29715	3.20306	3.34207	3.67595	0.561456	-0.401693	-0.799507	-0.799507	-0.799507	-0.799507
1-methylnicotinamide	Cofactors/Vitamins	Nicotinate and Nicotinamide Metabolism	0	-0.0674709	0.503595	-0.0469847	0.599302	0.459607	0.103027	-0.486026	-1.22689	0.00832265	-0.044665	-0.486626	-0.928398	-1.29274	-0.584642	-0.444369	-0.571224	-0.206253	-0.633274	-1.20699	-1.1193	-0.628469	-0.204649	-0.488126	-0.681028	-0.0946369
N1-Methyl-2-pyridone-5-carboxamide	Cofactors/Vitamins	Nicotinate and Nicotinamide Metabolism	0	0.197084	0.695117	0.213282	0.557096	0.12664	-0.276748	-0.69595	-1.34539	-1.11321	-0.552715	-2.09462	-1.89963	-1.2584	-0.0143512	0.564636	0.365344	-0.0768435	0.84757	-0.524395	-0.0725054	0.101905	-0.0701971	-0.732213	-0.788496	-0.162922
nicotinamide	Cofactors/Vitamins	Nicotinate and Nicotinamide Metabolism	0	-0.0146424	0.577778	-0.147296	0.448279	0.444958	0.439649	-0.223855	-1.26032	-0.982567	-0.780034	-0.376886	-0.244484	-0.00410762	-0.0882144	0.0493574	-0.036816	0.251318	0.29128	-0.0646512	-0.368827	-0.163997	0.475797	0.0507236	-0.415603	0.295781
nicotinate ribonucleoside	Cofactors/Vitamins	Nicotinate and Nicotinamide Metabolism	0	0.887223	0.490358	0.689594	-0.0591668	-0.760932	-0.35242	-1.36343	-3.58621	-5.21807	-5.21807	-3.68158	-2.71606	-2.17406	-1.22413	-0.0344209	-0.65269	-0.996727	0.816992	-2.48975	-0.951008	-0.452007	0.89739	0.751917	0.100176	0.219597
trigonelline (N'-methylnicotinate)	Cofactors/Vitamins	Nicotinate and Nicotinamide Metabolism	0	0.01201	0.0780501	-0.179226	-0.149994	-0.334989	0.0292489	0.084178	-1.53562	-3.31141	-1.23455	-0.798038	0.452095	0.248134	-0.00558863	0.0704611	0.294596	0.257244	0.141336	0.401748	-0.148824	-0.0453272	0.302196	0.212929	0.078764	-0.0475067
quinolinate	Cofactors/Vitamins	Nicotinate and Nicotinamide Metabolism	0	-1.41325	-1.41325	-1.41325	-1.29107	-1.41325	0.577195	0.931665	2.20048	1.77536	0.764822	0.932706	0.0430512	-0.449411	-1.41325	-0.425737	0.534086	0.631159	0.26045	0.521825	-0.11189	-1.41325	-0.507807	-1.41325	-1.41325	-1.41325
pantothenate	Cofactors/Vitamins	Pantothenate and CoA Metabolism	0	0.192075	0.1835	0.257952	0.0739355	0.243035	0.298094	0.515029	0.939406	0.69846	0.664866	0.705365	0.455846	0.132582	0.161835	0.0708389	0.036648	-0.0416191	0.268667	0.26718	0.100295	0.0932925	-0.0787896	-0.226577	-0.0702184	-0.138823
riboflavin (Vitamin B2)	Cofactors/Vitamins	Riboflavin Metabolism	0	-0.243232	0.229084	0.195955	0.197762	0.0973062	0.324136	-0.44574	-0.136165	-0.637553	-0.99119	-0.772802	-0.277467	-0.0204424	0.112841	0.00124222	-0.156028	-0.192961	0.119465	-0.0401844	-0.0533064	-0.139659	0.042049	-0.236546	-0.621318	-0.239151
flavin adenine dinucleotide (FAD)	Cofactors/Vitamins	Riboflavin Metabolism	0	-0.111395	0.250819	0.151568	0.131305	0.737598	0.862951	1.17611	1.32114	1.65917	1.70254	1.37269	0.980485	0.480955	0.622062	0.667351	0.840704	0.696936	0.604998	0.50443	0.237291	0.125333	0.313119	-0.0948246	-0.138137	0.134371
dihydrobiopterin	Cofactors/Vitamins	Tetrahydrobiopterin Metabolism	0	0.118381	0.546103	0.470077	0.0145392	0.0270907	0.571189	0.447292	0.310906	0.318459	0.117226	0.700648	1.29508	1.42973	1.23045	1.51291	1.74049	1.68021	1.5721	1.76453	1.23498	0.886244	0.525657	0.318626	0.0943353	0.704753
thiamin (Vitamin B1)	Cofactors/Vitamins	Thiamine Metabolism	0	-0.307473	0.0543203	-0.0610354	-0.132294	-0.111467	-0.190502	0.018335	-0.62044	-1.13063	-1.29728	-0.217787	0.0714578	-0.0355482	-0.154959	-0.0513	-0.0379495	0.190992	-0.0553007	0.0992327	-0.203287	0.0190146	-0.0209442	-0.0383737	-0.168979	-0.1797
gamma-tocopherol/beta-tocopherol	Cofactors/Vitamins	Tocopherol Metabolism	0	-0.0604449	-0.517978	-1.19635	-0.8658	-1.2201	-0.413607	0.455606	-1.45849	-0.155201	0.136569	0.73543	1.46185	1.09283	0.599418	0.8737	0.816415	0.76398	0.565094	0.718609	-0.507213	-1.09282	-1.00273	-0.987693	-0.834607	-1.77551
alpha-tocopherol	Cofactors/Vitamins	Tocopherol Metabolism	0	-1.55314	-2.4861	-3.52601	-3.57022	-3.86316	-3.5301	-1.17167	-2.2549	-0.452341	0.121456	0.689474	0.914182	0.475643	0.0142775	0.296708	0.40239	0.575266	0.35521	0.697507	-0.384482	-3.21241	-4.18423	-3.72558	-1.71798	-4.05887
retinol (Vitamin A)	Cofactors/Vitamins	Vitamin A Metabolism	0	-0.465294	-0.410193	-0.187619	0.0202667	-1.39813	-1.33635	-0.573713	-0.045615	0.194583	0.335174	0.891451	1.09102	0.246086	0.244594	0.270544	0.415106	0.239992	-0.0133964	0.610452	0.0454039	-0.310139	-0.654508	-0.247902	-0.570679	-0.422541
pyridoxal	Cofactors/Vitamins	Vitamin B6 Metabolism	0	0.121741	0.0379522	0.105766	-0.172742	-0.0245951	-0.547663	-0.447788	-0.194503	-0.754084	-0.882576	-0.327062	0.155095	0.270896	0.0524961	0.128743	-0.0646725	-0.201419	0.450867	0.0616406	-0.280098	-0.468589	-0.0413198	-0.158015	-0.323705	-0.105318
pyridoxate	Cofactors/Vitamins	Vitamin B6 Metabolism	0	0.0061062	0.385348	0.430396	0.511796	0.044144	-0.195861	0.0192249	-0.0637164	-0.748108	-1.52654	-0.416271	-0.489303	0.0909911	-0.0392359	-0.0524569	-0.188382	-0.104902	0.514587	0.0989853	-0.0509819	-0.37361	0.112475	-0.306957	-0.422933	-0.486309
succinylcarnitine (C4-DC)	Energy	TCA Cycle	0	-0.218987	-0.0218305	-0.37352	0.311405	0.413218	0.126276	-2.21846	-2.21846	-2.21846	-2.21846	-1.16346	-0.242814	-1.06508	-2.21846	-0.400665	-0.00744324	-1.08648	-0.459867	-2.21846	-1.24802	-0.0159971	0.566563	0.293097	1.12856	1.00439
citrate	Energy	TCA Cycle	0	-0.165727	0.0931199	-0.07171	0.217218	0.277147	0.0188787	0.333619	0.134611	0.814138	0.452551	0.494217	0.28917	0.37868	0.460517	0.347034	0.295761	0.391685	0.33215	0.527847	0.118591	0.0309446	-0.145311	-0.223851	0.072158	-0.130692
itaconate	Energy	TCA Cycle	0	0.362655	0.103645	-0.0269239	0.718095	3.01063	4.01761	5.96154	6.33681	6.46846	5.13142	5.38781	4.47542	4.16585	4.55029	4.83429	4.93703	4.51562	2.41389	3.99957	1.31964	0.831646	0.638083	0.290338	0.589275	0.504785
ceramide (d18:1/20:0, d16:1/22:0, d20:1/18:0)*	Lipid	Ceramides	0	-1.56149	-0.341448	-1.56149	0.506997	1.07884	0.93866	1.32832	0.938245	2.25452	1.20918	0.497309	0.471009	-0.361491	-0.18655	0.756911	0.00119264	0.507556	0.48954	0.450201	-0.270651	-0.567667	-0.601663	-0.117401	-0.304632	0.0715725
glycosyl ceramide (d18:1/20:0, d16:1/22:0)*	Lipid	Ceramides	0	-0.362514	0.217144	-0.386963	0.204334	0.346427	0.102636	0.159746	-0.466487	1.01739	1.32707	0.64607	0.22005	-0.742264	-0.422251	-0.361679	-0.406135	-0.480753	-0.540592	-0.549891	-0.895427	-0.605987	-0.698766	-0.830162	-0.374771	-0.0977812
linoleoyl-arachidonoyl-glycerol (18:2/20:4) [1]*	Lipid	Diacylglycerol	0	-0.464819	-0.253771	-0.672517	-0.512641	-0.0971488	0.815102	1.52435	1.93131	1.83824	1.93191	1.40362	0.312759	-0.443311	-1.01695	0.0325633	0.250062	0.0941302	-0.376662	0.101883	-0.26232	-0.554397	-0.331951	0.0380441	-0.316927	-0.468523
linoleoyl-arachidonoyl-glycerol (18:2/20:4) [2]*	Lipid	Diacylglycerol	0	-0.0743672	0.119618	-0.556105	-0.180134	-0.308098	0.786981	1.42062	1.10925	1.02582	1.40215	0.833392	-0.171248	-0.800824	-1.03737	-0.185697	0.24408	-0.177068	-0.0479937	-0.0142573	-0.29538	-0.612567	-0.303315	-0.294747	-0.17634	-0.316586
linoleoyl-docosahexaenoyl-glycerol (18:2/22:6) [2]*	Lipid	Diacylglycerol	0	-0.392672	-0.160887	-1.09136	-0.658983	-0.197817	-0.519601	1.12524	1.64288	1.61261	2.09938	1.73492	0.204309	-2.01685	-2.07349	-0.33626	-0.135075	-0.32281	-0.100912	0.45784	-0.311827	-0.160746	-0.379834	-0.374437	-0.453619	-0.421558
palmitoyl-linoleoyl-glycerol (16:0/18:2) [2]*	Lipid	Diacylglycerol	0	-0.263311	-0.0621536	-0.618774	-0.745804	-0.229354	0.54121	1.33859	0.550935	1.93549	1.95522	1.30959	-0.104715	-0.692784	-1.34409	-0.787436	0.298608	-0.225435	-0.272206	0.0916802	-0.864786	-1.27067	-0.371303	-0.515497	-0.505302	-0.850562
linoleoyl-linolenoyl-glycerol (18:2/18:3) [1]*	Lipid	Diacylglycerol	0	-0.0715433	-0.269996	-0.783252	-0.740147	-0.533854	0.0344263	1.40203	-0.392111	0.578868	0.342288	0.554471	0.248206	-0.41704	-1.348	-0.878496	0.117169	-0.153613	0.0221922	0.0954101	-1.09197	-0.955609	-0.0182412	-0.253766	-0.292596	-0.707682
linoleoyl-linoleoyl-glycerol (18:2/18:2) [1]*	Lipid	Diacylglycerol	0	0.324786	0.0713857	-0.622102	-0.57446	-0.0905719	0.437375	1.37587	0.533512	1.1685	2.42245	1.46076	0.777645	-0.426679	-1.33494	-0.503366	0.564592	0.541707	0.425315	0.304202	0.0197407	-0.490828	0.212312	0.391737	-0.288771	-0.531385
oleoyl-arachidonoyl-glycerol (18:1/20:4) [2]*	Lipid	Diacylglycerol	0	-0.106415	-0.171256	-0.46822	-0.373653	0.168034	1.03429	1.35422	1.65972	2.20509	1.98471	1.39417	-0.285916	-0.359571	-0.43289	0.348042	0.548608	0.231587	-0.064608	0.232646	-0.284063	-0.386428	-0.224699	-0.0819174	0.191106	-0.289461
palmitoyl-arachidonoyl-glycerol (16:0/20:4) [2]*	Lipid	Diacylglycerol	0	0	0	0	0	0	0	0.95342	1.8892	2.88248	2.80002	1.99358	0.562077	0	0	0	0	0	0	0	0	0	0	0	0	0
12-HETE	Lipid	Eicosanoid	0	-0.551039	0.0788007	-0.433525	-0.642266	-0.0147307	-0.469624	-0.308004	-0.329167	0.325472	2.73942	1.81647	-0.517404	-1.23326	-1.43353	-1.45263	-1.74152	-2.36702	-0.860184	-1.67871	-1.22582	-0.107067	-1.06782	-1.99325	-1.22402	-0.431906
N-palmitoyltaurine	Lipid	Endocannabinoid	0	0.328693	0.146117	-0.483327	-0.181252	-0.0208439	0.362146	0.0658112	1.63758	2.21459	1.42562	0.631688	0.0404961	0.0935272	-0.158154	0.22287	-0.156378	0.0613939	-0.119941	0.191849	-0.563161	-0.0380655	0.232522	-0.378623	-0.0444538	-0.88868
oleoyl ethanolamide	Lipid	Endocannabinoid	0	0.0557188	0.244805	0.0776216	-0.0902077	-0.0877515	-0.10057	0.0834454	0.436507	0.607317	0.893061	0.642063	0.743754	0.615479	0.286677	-0.0142337	0.314674	0.314303	0.010431	0.279972	-0.204593	0.219773	-0.224421	-0.143969	0.135669	-0.408944
stearoyl ethanolamide	Lipid	Endocannabinoid	0	-0.500991	-0.483605	-0.367576	-0.317379	-0.224629	0.493886	0.0943592	0.175245	1.47479	1.16818	0.0484068	-0.43621	-0.819107	-0.791651	-0.472809	-0.692684	-0.609789	-0.590104	-0.644734	-0.465125	-0.590262	-0.495074	-0.852004	-0.811367	-0.619089
butyrylcarnitine (C4)	Lipid	Fatty Acid Metabolism (also BCAA Metabolism)	0	0.307561	-0.2234	0.15575	-0.3043	-0.0857081	0.0130978	0.739701	0.349751	0.605325	0.506657	0.830086	0.73597	1.2528	0.845604	0.683463	0.576522	0.438625	0.426901	0.820251	0.125427	0.194799	0.263805	-0.00284766	0.297614	-0.413261
butyrylglycine	Lipid	Fatty Acid Metabolism (also BCAA Metabolism)	0	0.344272	0.754117	0.529789	0.723635	0.419743	0.582648	0.253636	0.0794154	-0.0446165	-0.0516047	0.90517	0.436532	-0.0508675	0.22074	0.897552	0.853737	1.05984	0.304211	0.80285	-0.131575	-0.256043	0.218601	0.290751	-0.4282	-0.263283
methylmalonate (MMA)	Lipid	Fatty Acid Metabolism (also BCAA Metabolism)	0	-0.11549	0.227705	0.0247778	0.197971	-0.0560248	-0.0239476	0.0543788	0.0135959	-0.236274	-0.492741	0.352462	0.81906	0.659284	0.185058	0.162351	0.438823	0.575514	0.470313	0.451933	0.20162	-0.0109071	0.105628	-0.286319	-0.161451	-0.0507092
propionylcarnitine (C3)	Lipid	Fatty Acid Metabolism (also BCAA Metabolism)	0	0.110027	0.0225426	-0.13875	-0.678438	-0.0613846	-0.153551	0.807826	1.04429	1.43413	1.02236	1.0666	1.07888	0.835402	0.26276	0.143255	0.295972	0.199066	0.58655	0.947858	0.412745	0.452787	0.693857	0.532219	0.100659	-0.34111
propionylglycine	Lipid	Fatty Acid Metabolism (also BCAA Metabolism)	0	0.405879	0.307094	0.265417	0.521596	0.41706	0.486825	0.531398	0.833682	0.00994254	-0.494491	-0.191355	0.0386327	0.816683	0.510275	0.489106	0.695799	0.754106	0.656451	0.579808	0.183581	-0.00736022	0.29625	0.286714	0.786771	0.246976
arachidoylcarnitine (C20)*	Lipid	Fatty Acid Metabolism(Acyl Carnitine)	0	-0.625907	0.116364	-0.509773	-0.316369	0.227687	0.257996	0.472116	1.88707	3.41872	3.2471	1.71713	0.482784	-0.359706	-0.241051	0.0386612	0.0772123	0.44649	-0.0324358	0.513988	0.456081	0.350866	-0.17499	-0.0872752	-0.222129	0.0489307
behenoylcarnitine (C22)*	Lipid	Fatty Acid Metabolism(Acyl Carnitine)	0	-1.14722	-0.358447	-0.879898	-0.679303	-0.304406	-0.170527	0.238134	0.968413	1.78668	1.97268	1.15519	0.0912517	-1.00241	-0.952876	-0.524432	-1.03412	-0.351431	-0.285038	0.0588616	-0.0905604	-0.0386477	-0.487569	-0.791784	-0.87204	-0.326552
eicosenoylcarnitine (C20:1)*	Lipid	Fatty Acid Metabolism(Acyl Carnitine)	0	-1.00468	-0.274551	-1.0148	-0.289547	-0.0295154	-0.0296376	-0.431212	1.44531	3.18429	2.56369	0.72668	-0.547147	-1.07432	-0.611548	0.0379321	-0.350527	-0.177247	-0.182266	-0.241335	-0.334737	-0.439145	-0.532871	-0.730276	-0.409262	-0.224309
linoleoylcarnitine (C18:2)*	Lipid	Fatty Acid Metabolism(Acyl Carnitine)	0	-0.675199	-0.310232	-0.317309	-0.149238	0.0798818	0.235248	0.0610387	1.27344	2.98289	2.28327	0.702508	-0.213641	-0.765962	-0.241138	0.267062	0.110003	0.0670301	0.0178252	0.260898	-0.028609	0.0252579	-0.372262	-0.129639	-0.430158	-0.24839
myristoleoylcarnitine (C14:1)*	Lipid	Fatty Acid Metabolism(Acyl Carnitine)	0	-0.792676	-0.353324	0.147927	-0.0291665	0.00688504	-0.293581	0.00926608	1.14213	2.97198	2.19759	0.79732	-0.59082	-0.965899	-0.364886	0.0670118	0.157303	0.323645	0.180605	0.232957	-0.040131	-0.220539	-0.399766	-0.404046	-0.472946	-0.123599
nervonoylcarnitine (C24:1)*	Lipid	Fatty Acid Metabolism(Acyl Carnitine)	0	-1.50098	-0.0769465	-0.901075	-0.710634	-0.0485551	0.079862	0.495233	0.792368	1.7905	2.01496	1.1715	-0.309726	-1.29687	-0.317955	-0.0713122	-0.305194	-0.58447	-0.367973	-1.50098	0.0729157	0.0209738	-0.333844	-0.27625	-0.457584	-0.105302
oleoylcarnitine (C18:1)	Lipid	Fatty Acid Metabolism(Acyl Carnitine)	0	-0.695823	-0.217357	-0.70866	-0.152808	0.0241139	0.0765722	0.153826	1.02519	2.69998	2.21009	0.85922	-0.847221	-1.04173	-0.587487	0.0365259	0.044449	-0.181124	0.0072251	-0.0592764	-0.0984828	-0.357479	-0.534818	-0.325684	-0.345761	-0.135371
palmitoleoylcarnitine (C16:1)*	Lipid	Fatty Acid Metabolism(Acyl Carnitine)	0	-0.879717	-0.0415278	0.504906	0.377454	0.230681	0.00860008	0.105547	1.68897	3.50357	2.48585	1.47145	-1.06	-1.20785	-0.603873	0.194216	0.312541	0.558006	0.325083	0.377342	0.0187375	-0.225857	-0.404549	-0.327128	-0.132993	-0.229109
stearoylcarnitine (C18)	Lipid	Fatty Acid Metabolism(Acyl Carnitine)	0	-0.555232	-0.148091	-0.502336	-0.272883	-0.0211674	0.10102	0.270887	1.95996	3.46529	2.62355	0.942164	-0.359431	-0.756131	-0.393667	-0.0173086	-0.0143144	0.183183	-0.0151692	0.122425	0.288083	0.167698	-0.0356944	-0.165068	-0.285891	-0.135178
3-hydroxybutyrylcarnitine (1)	Lipid	Fatty Acid Metabolism(Acyl Carnitine)	0	-0.518303	-0.345728	-0.269263	0.131245	0.192645	-0.625349	-0.19733	1.04328	1.61256	1.37502	0.541982	-0.729879	-0.701527	-0.969021	-0.538913	-0.410876	0.17609	0.593155	0.266364	0.0265436	-0.209807	-0.391536	-0.382351	-0.740582	-0.763441
3-hydroxybutyrylcarnitine (2)	Lipid	Fatty Acid Metabolism(Acyl Carnitine)	0	0.0248205	0.383996	0.130446	0.409854	0.139414	0.0157691	0.413493	0.735496	1.5134	1.61606	0.855654	-0.0476785	0.205316	0.175182	0.39825	0.397237	0.20024	0.647563	0.352446	0.178283	0.314566	0.036096	-0.0399364	0.110023	-0.28632
acetylcarnitine (C2)	Lipid	Fatty Acid Metabolism(Acyl Carnitine)	0	0.0343496	0.0249887	0.0625465	-0.0224141	0.0853972	0.118402	0.380525	0.502297	0.694331	0.748583	0.421202	0.270511	0.209698	0.175096	0.258442	0.209128	0.143676	0.276508	0.386209	0.359106	0.405492	0.329519	0.162345	0.0490743	-0.0147376
adrenoylcarnitine (C22:4)*	Lipid	Fatty Acid Metabolism(Acyl Carnitine)	0	-0.759455	-0.759455	-0.759455	-0.759455	-0.759455	-0.277631	0.374309	1.27871	1.69342	2.00469	0.72194	-0.239077	-0.468314	-0.51513	-0.348471	-0.0455181	-0.0257312	0.0591629	0.459464	0.236792	0.156442	-0.759455	-0.377856	-0.759455	-0.0543184
arachidonoylcarnitine (C20:4)	Lipid	Fatty Acid Metabolism(Acyl Carnitine)	0	-0.642381	-0.424912	-0.295116	-0.397345	-0.173226	-0.0243476	-0.121921	1.20235	1.46988	1.18819	0.575528	-0.982394	-0.863272	-0.427381	-0.160411	-0.266424	-0.207208	-0.188546	0.100594	0.0455905	0.275012	-0.171156	-0.117075	-0.181237	0.173609
cis-4-decenoylcarnitine (C10:1)	Lipid	Fatty Acid Metabolism(Acyl Carnitine)	0	-0.505343	-0.486447	-0.204324	-0.173279	-0.0918573	-0.0547727	-0.0359844	0.478857	0.9883	0.727731	0.31945	-0.227329	-0.00496073	-0.00218645	0.393836	-0.160362	0.0583751	0.342148	0.476766	0.460239	0.247782	-0.13663	-0.0707462	-0.210546	-0.00876577
decanoylcarnitine (C10)	Lipid	Fatty Acid Metabolism(Acyl Carnitine)	0	-0.230452	0.209348	0.533511	0.563394	0.519264	0.017742	0.789748	1.41201	3.27218	2.91786	1.41908	-0.337867	0.181212	0.00123062	0.657978	0.903809	0.757826	0.98515	0.74955	0.512232	0.950531	0.220838	-0.0564932	-0.236966	0.268462
docosahexaenoylcarnitine (C22:6)*	Lipid	Fatty Acid Metabolism(Acyl Carnitine)	0	-1.18745	-0.496993	-0.938117	-0.149504	-0.098283	-0.0726422	0.815278	1.68647	1.64954	2.39314	1.2681	-0.249263	-1.18745	-0.430347	0.233041	-0.128905	-0.00597115	-0.524825	0.216611	0.316887	0.278101	-1.18745	-0.36942	-0.0231931	0.230786
hexanoylcarnitine (C6)	Lipid	Fatty Acid Metabolism(Acyl Carnitine)	0	0.488597	-0.223431	0.251605	-0.0701921	0.469381	0.353754	0.920953	1.34029	1.90867	1.81336	1.65895	0.393177	0.696714	0.730515	1	0.683201	0.889919	0.528725	0.995009	0.294894	0.531887	0.310882	0.0657452	-0.249602	0.159995
laurylcarnitine (C12)	Lipid	Fatty Acid Metabolism(Acyl Carnitine)	0	-0.485459	0.0492318	0.136596	0.238849	0.0975797	-0.0453999	0.194387	1.43676	3.34601	2.45982	1.08837	-0.618797	-0.535348	-0.0804964	0.232118	0.356164	0.635776	0.538854	0.454163	0.0171723	0.541687	-0.300182	-0.225645	-0.377133	-0.0434386
lignoceroylcarnitine (C24)*	Lipid	Fatty Acid Metabolism(Acyl Carnitine)	0	-0.289674	-0.191511	-0.605299	-0.461127	0.100849	0.0352966	0.186351	0.466013	1.19672	1.54348	0.898781	0.844158	-1.03745	-0.844414	-0.299918	-0.209287	-0.24892	-0.139463	-0.0994574	0.0376994	-0.0318366	-0.347376	-0.292522	-0.689342	-0.268576
octanoylcarnitine (C8)	Lipid	Fatty Acid Metabolism(Acyl Carnitine)	0	-0.0729669	-0.2385	0.215473	0.176224	0.423904	-0.0262559	0.458321	1.08146	2.05112	1.85082	1.98201	-0.0442116	-0.0460378	0.233199	0.671575	0.327052	0.528839	0.640461	0.80135	0.463208	0.513918	0.0476996	0.0837203	-0.115477	0.164743
pimeloylcarnitine/3-methyladipoylcarnitine (C7-DC)	Lipid	Fatty Acid Metabolism(Acyl Carnitine)	0	-0.329847	0.241595	-0.577953	-0.424033	-0.135898	0.0343861	0.35341	1.49879	2.76807	1.6995	1.10266	0.164397	-0.504342	-0.817563	-0.477445	-0.583758	0.033994	-0.327997	-0.43829	0.0678441	0.0319009	-0.167718	-0.581754	-0.407074	-0.739511
3,4-methylene heptanoylglycine	Lipid	Fatty Acid Metabolism(Acyl Glycine)	0	-0.55955	0.14264	-0.155556	0.0425914	-0.0665456	-0.0880471	-0.20767	-1.08584	-1.45318	-2.28401	-1.94724	-1.50272	-0.735755	-0.586196	0.0384263	0.0444807	-0.092054	0.308102	-0.163821	-0.179759	-0.22183	0.0888519	-0.0269915	-0.493184	-0.0869437
hexanoylglycine	Lipid	Fatty Acid Metabolism(Acyl Glycine)	0	-0.344951	0.20838	0.383862	0.423559	0.730375	0.0925456	0.154765	0.566564	0.76306	0.386535	0.302449	-1.13998	-1.00539	-0.367858	0.218167	0.413218	0.282254	0.289414	0.479617	-0.415183	-0.840278	-0.649523	-0.682997	-1.02657	-0.309183
N-octanoylglycine	Lipid	Fatty Acid Metabolism(Acyl Glycine)	0	-0.34868	0.472823	0.162449	0.604594	0.816814	0.166693	0.531011	1.31276	2.33532	1.52353	0.537347	-1.33533	-1.296	-0.642593	0.63948	0.607162	0.612062	0.696055	0.757949	-0.642593	-0.978581	-1.49473	-1.00357	-1.74395	-0.715491
N-palmitoylglycine	Lipid	Fatty Acid Metabolism(Acyl Glycine)	0	0.0380145	0.361276	-0.0887902	-0.0077246	-0.476416	-0.199632	0.0413456	0.424763	0.0616645	0.749851	0.396559	0.388473	-0.0651345	0.0386814	0.238662	0.0859011	0.390172	0.235612	0.497749	-0.361543	0.0984282	0.255109	0.0398476	0.174881	-0.211279
17-methylstearate	Lipid	Fatty Acid, Branched	0	-0.327097	-0.00663361	-0.180946	0.0190557	-0.191668	0.260021	-0.3851	0.361298	0.510889	0.508762	-0.177897	-0.774198	-0.603762	-0.395687	-0.724049	-0.597298	-0.59154	-0.379836	-0.745516	-0.549068	-0.414252	-0.894367	-0.564911	-0.755708	-0.697428
2-hydroxyglutarate	Lipid	Fatty Acid, Dicarboxylate	0	0.0595679	-0.0195199	-0.20155	-0.0793345	-0.312177	-0.134316	-0.311429	-0.82831	-0.257601	-1.13049	-0.475203	-0.627987	-0.328416	-0.253432	-0.193815	-0.455913	-0.00168694	-0.021841	0.126514	-0.343616	-0.482756	-0.231493	-0.374039	-0.492888	-0.457566
maleate	Lipid	Fatty Acid, Dicarboxylate	0	-0.534777	-0.11167	-0.423396	-0.372579	-1.38659	-0.472189	0.467341	0.0681838	0.76447	0.227399	0.269051	-0.10436	0.396971	0.0653903	-0.23553	0.0694517	0.0686911	-0.233496	-0.000132998	-0.810117	-0.415392	-0.362456	-0.228968	-0.671067	-0.0359531
pimelate (heptanedioate)	Lipid	Fatty Acid, Dicarboxylate	0	0.56883	0.271436	-0.31534	-0.40626	-0.45763	0.227269	0.0556296	-1.13922	-1.13922	-1.13922	-1.13922	0.404343	0.499227	1.13318	-0.101006	0.200302	0.126516	0.0503187	0.320793	0.254284	0.032209	0.0046917	-0.036098	-1.13922	-0.0429263
9,10-DiHOME	Lipid	Fatty Acid, Dihydroxy	0	-0.64168	-0.569306	-0.544277	-0.294583	-0.355773	0.440707	0.291326	0.821244	0.988145	0.666567	0.378494	-1.17033	-0.86317	-0.590587	-0.30928	-0.614135	-0.716546	-0.315317	-0.390857	-0.875009	-0.460662	-0.236291	-0.191852	-0.444978	-0.268973
16-hydroxypalmitate	Lipid	Fatty Acid, Monohydroxy	0	0.170907	0.094242	0.287326	0.2025	0.0577126	0.394022	0.0270142	0.621698	0.641043	0.442787	-0.00826417	-1.04551	-0.800628	-0.297453	0.114451	-0.136785	0.0520874	0.24231	0.117078	-0.144216	-0.131031	-0.107757	0.0569926	0.0205295	0.0205295
2-hydroxyoctanoate	Lipid	Fatty Acid, Monohydroxy	0	-0.00841224	0.186576	-0.157382	0.0947203	-0.241019	-0.0118162	-0.0276806	-0.795386	-1.1843	-1.37471	-0.939205	-0.296828	-0.293142	-0.134527	-0.192717	-0.0194093	-0.438258	0.0331669	-0.504557	-0.503492	-0.645297	-0.42576	-0.215212	-0.543987	-0.426601
2-hydroxypalmitate	Lipid	Fatty Acid, Monohydroxy	0	-0.0628719	-0.000696113	-0.074257	-0.192546	-0.043807	0.0613135	-0.243541	0.82626	1.00985	0.403929	-0.227319	-0.597755	-0.221952	-0.296063	-0.0561994	-0.0983431	-0.151307	0.0145413	-0.0375077	-0.0836662	-0.000835376	-0.22683	-0.0935827	-0.136543	0.0387269
2-hydroxystearate	Lipid	Fatty Acid, Monohydroxy	0	-0.0443773	0.076976	0.0259856	0.150294	-0.0960438	-0.080178	-0.0818849	0.516159	0.799593	0.472053	-0.242659	-0.56407	-0.663223	-0.480835	-0.212899	-0.609509	-0.206368	-0.214458	-0.101516	-0.113394	0.0911836	-0.178557	-0.0858753	-0.0432684	-0.311578
3-hydroxyhexanoate	Lipid	Fatty Acid, Monohydroxy	0	-0.542152	-0.0323518	-0.314745	0.182698	-0.067371	-0.160061	-0.23497	0.557908	1.98769	0.614805	0.0300825	-1.67147	-1.37022	-1.15078	0.0275594	-0.373397	-0.0867659	0.00355027	0.0611962	-0.558125	-0.700057	-0.626494	-0.393544	-0.678513	-0.557944
3-hydroxylaurate	Lipid	Fatty Acid, Monohydroxy	0	-0.44472	-0.00480878	0.471201	-0.0391796	-0.171973	0.153307	-0.212619	0.859101	2.06834	1.51794	0.521805	-1.52304	-1.0962	-0.842713	-0.373621	-0.364876	-0.315174	0.0593269	-0.356498	-0.642664	-0.189834	-0.645742	-0.680832	-0.137036	-0.0755563
13-HODE + 9-HODE	Lipid	Fatty Acid, Monohydroxy	0	0.0149064	-0.262535	0.511382	0.271797	-0.402119	0.837776	-0.0412759	0.817831	0.850622	1.04498	-0.0233988	-0.402702	0.157911	-0.513881	-0.117474	-0.179505	-0.528003	0.241302	0.284517	0.111619	-0.330917	-0.0549451	0.162906	0.133076	-0.202479
3-hydroxydecanoate	Lipid	Fatty Acid, Monohydroxy	0	-0.596226	0.0332729	0.148873	0.26442	-0.0787591	0.0539434	-0.180093	0.610206	1.87236	1.53437	0.471711	-0.987448	-1.08116	-1.11134	-0.0544672	-0.388721	-0.100085	-0.146913	-0.0568256	-0.444757	-0.598515	-0.558976	-0.639953	-0.625684	-0.189838
glycerol	Lipid	Glycerolipid Metabolism	0	-0.149712	0.16116	0.14813	0.357083	-0.282527	-0.203144	-0.534503	-0.581194	-0.766349	-0.893321	-1.00508	-1.60288	-0.649838	-0.650949	-0.340471	-0.840423	-0.611861	0.0274474	-0.580136	-0.433909	-0.478721	-0.112013	0.21934	0.00600119	-0.252578
glycerol 3-phosphate	Lipid	Glycerolipid Metabolism	0	-0.0867116	0.358146	0.304641	0.305419	0.200797	0.0407756	0.0432667	-0.0447699	-0.340481	-0.981524	-0.723404	-0.416748	0.186219	0.261965	0.377155	0.167643	0.363015	0.332024	0.249884	0.0923578	0.320003	0.199681	-0.0760268	0.159199	0.10538
glycerophosphoglycerol	Lipid	Glycerolipid Metabolism	0	-0.0113153	0.144989	0.122979	0.258734	0.526004	0.479623	0.755148	0.499639	0.164972	-0.344574	-0.218129	-0.288612	0.233308	0.375039	0.200692	-0.192143	0.00730036	-0.0515569	0.107302	-0.547612	-0.367996	-0.315684	-0.746905	-0.0888999	-0.0712605
3-hydroxybutyrate (BHBA)	Lipid	Ketone Bodies	0	-0.252286	0.46057	0.211064	0.618471	0.229556	0.0066645	0.034324	1.08212	2.28396	1.93427	0.993305	-0.176537	-0.284672	-0.261866	-0.0982957	0.378935	0.546776	0.693706	0.681887	0.409809	-0.135418	-0.39541	-0.289971	-0.166756	-0.516794
10-heptadecenoate (17:1n7)	Lipid	Long Chain Fatty Acid	0	-0.559082	-0.269619	-0.190145	-0.204961	-0.323955	0.496149	0.355778	0.597319	0.861932	0.877691	0.0206553	-1.20837	-1.14574	-0.647049	-0.811604	-0.624591	-0.597499	-0.599655	-0.269223	-0.806616	-0.495955	-0.925737	-0.485339	-0.36906	-0.524178
myristate (14:0)	Lipid	Long Chain Fatty Acid	0	0.168131	0.0966747	0.577532	0.219836	0.227925	0.317183	0.0213501	0.320329	0.530012	0.336417	-0.0362017	-1.12739	-0.829542	-0.346035	-0.393735	-0.252695	0.0121564	0.330651	0.00898246	-0.0356057	-0.0983216	-0.235825	0.127866	0.189444	-0.0788505
myristoleate (14:1n5)	Lipid	Long Chain Fatty Acid	0	-0.797941	-0.153697	0.402691	0.264953	0.157221	0.0710557	-0.271507	0.489244	2.29275	0.97797	0.153216	-2.07983	-1.6462	-1.02663	-0.377583	-0.674385	-0.16991	-0.252937	-0.382419	-0.510844	-0.137801	-0.910084	-0.472184	0.115411	0.0319727
nonadecanoate (19:0)	Lipid	Long Chain Fatty Acid	0	0.0523312	-0.0820542	-0.177662	-0.128182	-0.316735	0.360976	-0.397877	-0.00823108	-0.0170942	0.326084	-0.33835	-0.599777	-0.554762	-0.948673	-0.873891	-0.443052	-0.661338	-0.45806	-0.601355	-0.543935	-0.626298	-0.571672	-0.220525	-0.484826	-0.442109
palmitate (16:0)	Lipid	Long Chain Fatty Acid	0	0.285171	0.0778309	0.0652926	0.200289	-0.152308	0.448467	0.386348	0.52571	0.777358	0.907195	0.238276	-0.823755	-0.733144	-0.572234	-0.517801	-0.138169	0.0961311	-0.218159	-0.130723	-0.296743	-0.288753	-0.354949	-0.167611	-0.172749	-0.415951
palmitoleate (16:1n7)	Lipid	Long Chain Fatty Acid	0	-0.0981615	0.488532	0.806781	0.914502	0.437045	0.733681	0.459858	1.00443	1.35763	1.12911	0.277329	-1.66037	-1.2637	-0.871655	-0.54893	-0.326118	0.16717	0.30211	0.221005	-0.0371268	0.263034	-0.510038	-0.00889778	0.665148	0.121131
10-nonadecenoate (19:1n9)	Lipid	Long Chain Fatty Acid	0	-0.318541	-0.255005	-0.171486	-0.440177	-0.44667	0.414251	0.16733	0.593006	0.536595	1.06964	-0.267621	-0.878218	-0.594489	-0.45141	-0.617279	-0.559525	-0.619611	-0.460191	-0.492192	-0.781224	-0.482002	-0.9435	-0.411605	-0.242884	-0.568991
behenate (22:0)*	Lipid	Long Chain Fatty Acid	0	0.310606	0.17748	0.243944	0.16927	0.0641962	0.716931	0.805887	0.180602	0.558976	0.386993	0.544046	0.491857	0.289139	0.36638	0.145424	0.219143	0.239674	0.130278	0.334297	0.150892	0.383256	0.141461	0.0583886	0.265389	-0.0739031
eicosenoate (20:1)	Lipid	Long Chain Fatty Acid	0	0.0600996	0.104684	0.109919	-0.148918	-0.0206027	0.753887	0.416086	0.972664	0.765504	1.18174	0.082688	-0.587259	-0.647606	-0.317117	-0.285607	-0.512028	-0.329916	-0.306699	-0.49696	-0.384846	-0.411807	-0.5184	-0.146303	-0.483514	-0.364951
nervonate (24:1n9)*	Lipid	Long Chain Fatty Acid	0	-0.602166	-0.119889	0.427421	0.0495106	0.70095	0.729484	1.54801	1.43442	2.08897	1.47338	1.22461	1.20766	0.324744	0.905453	0.74614	0.383605	0.596387	0.121206	0.580949	0.00785536	0.699674	-0.131649	-0.173349	0.436027	-0.191698
oleate/vaccenate (18:1)	Lipid	Long Chain Fatty Acid	0	-0.118752	-0.0636672	0.0820497	-0.0225723	-0.0634042	0.719344	0.598405	0.712142	1.17459	1.21102	0.258708	-1.1522	-1.21566	-0.7704	-0.747405	-0.45234	-0.208369	-0.306721	-0.135379	-0.439998	-0.557297	-0.783118	-0.378675	-0.118206	-0.412942
1-arachidonoyl-GPC (20:4n6)*	Lipid	Lysophospholipid	0	-0.403862	-0.206944	-0.361916	-0.226634	-0.229719	-0.302258	-0.705859	-1.74485	-1.82533	-0.876321	-0.618374	-0.797401	-0.664444	-0.444724	-0.216756	-0.279151	-0.297607	-0.321871	-0.364125	-0.220486	-0.0445265	-0.285417	-0.276653	-0.159374	-0.0935216
1-arachidonoyl-GPE (20:4n6)*	Lipid	Lysophospholipid	0	-0.174716	-0.25875	-0.214965	-0.0711747	-0.513815	0.168081	0.0871115	-0.228506	0.0113456	0.623588	0.349486	-0.809845	-1.20499	-1.11841	-1.11745	-0.580877	-0.226564	-0.448223	-0.666222	-0.716397	-0.79826	-0.756374	-0.93894	-0.836256	-0.371826
1-linolenoyl-GPC (18:3)*	Lipid	Lysophospholipid	0	0.180034	-0.191544	-0.119442	-0.432246	-0.175004	0.0087327	-1.11541	-2.18471	-1.90254	-1.77488	-1.38523	-0.804501	-0.409052	-0.675732	-0.566374	-0.636573	-0.746007	-0.711299	-1.00486	-0.830847	-0.874866	-0.514315	-0.238397	-0.270308	-0.454122
1-linoleoyl-GPC (18:2)	Lipid	Lysophospholipid	0	0.282777	0.0166434	-0.130272	-0.277956	-0.0129823	-0.134049	-0.40502	-1.37438	-1.22737	-0.294466	-0.189255	-0.138242	-0.297034	-0.345631	-0.269029	-0.215884	-0.28844	-0.247535	-0.203925	-0.153221	-0.502788	-0.204776	-0.351116	-0.172373	-0.332553
1-linoleoyl-GPE (18:2)*	Lipid	Lysophospholipid	0	-0.130959	-0.178903	-0.177235	-0.466847	-0.28459	0.273055	-0.379059	-0.800868	-0.677019	0.100644	-0.136851	-0.601429	-0.197497	-0.499074	-0.396694	-0.416091	-0.396139	-0.623807	-0.988255	-0.935751	-1.08679	-0.482209	-0.474581	-0.58918	-0.445183
1-linoleoyl-GPG (18:2)*	Lipid	Lysophospholipid	0	0.27527	-0.0329026	-0.388948	-0.2349	-0.366797	0.308456	0.412656	0.546575	0.707112	1.26319	0.9455	0.674552	0.733922	0.328052	-0.111139	0.0274379	0.00736793	0.151818	0.26703	-0.78379	-0.582124	-0.605709	-0.32065	-0.0207462	-0.375248
1-linoleoyl-GPI (18:2)*	Lipid	Lysophospholipid	0	0.260105	-0.137202	-0.408124	-0.0774461	-0.35274	0.305962	-0.225628	-1.34396	-1.8087	-1.45063	-1.23574	-0.161213	-0.225124	-0.207354	-0.722461	-0.483683	-0.517978	-0.3867	-0.569001	-1.01898	-0.579104	-0.510746	-0.220975	-0.165314	-0.67508
1-oleoyl-GPC (18:1)	Lipid	Lysophospholipid	0	0.00997154	0.0983223	0.110892	-0.0147595	-0.118437	-0.159937	-0.602679	-1.26205	-0.956985	-0.457857	-0.390897	-0.234267	0.00570646	0.277537	0.129305	-0.126216	-0.291963	-0.133468	-0.204014	-0.172624	-0.0920182	-0.0502456	-0.183503	0.0678996	0.0176941
1-oleoyl-GPE (18:1)	Lipid	Lysophospholipid	0	-0.121912	-0.0274734	-0.176889	-0.173715	-0.297321	0.115241	-0.34148	-1.01	-0.574841	0.0942109	0.128509	-0.100111	-0.0497822	-0.137427	-0.229693	-0.18718	-0.179202	-0.252342	-0.199744	-0.359234	-0.351878	-0.130417	-0.0961448	0.0909758	-0.0605342
1-palmitoleoyl-GPC (16:1)*	Lipid	Lysophospholipid	0	0.0228184	0.00108905	0.340546	0.0489136	-0.265166	-0.213583	-0.788474	-1.10466	-0.55519	-0.24609	-0.264003	-0.25098	0.369601	0.117245	-0.187983	-0.248102	-0.50125	-0.235078	-0.481172	-0.434782	-0.420617	-0.347021	-0.454884	0.0310166	-0.0886133
1-palmitoyl-GPG (16:0)*	Lipid	Lysophospholipid	0	0.0539626	-0.485081	-0.902311	-0.34337	-0.253281	0.0641626	0.0028391	-0.374908	0.19178	0.342441	0.381569	0.632523	-0.194129	-0.234698	-0.473197	-0.86853	-0.596126	-0.479385	-1.54872	-1.54872	-1.54872	-0.713192	-1.22239	-1.54872	-1.21262
1-stearoyl-GPC (18:0)	Lipid	Lysophospholipid	0	-0.209655	-0.0567475	-0.199493	-0.0718122	-0.284079	-0.220468	-0.325192	-0.647276	-0.294248	0.25056	0.0916725	-0.223801	-0.583907	-0.504759	-0.189685	-0.0658194	-0.0554561	-0.0931177	-0.153039	-0.0951064	-0.0572644	-0.178256	-0.22976	-0.288775	-0.264401
1-palmitoyl-GPE (16:0)	Lipid	Lysophospholipid	0	0.0149425	0.167006	-0.043432	0.117099	0.0643876	0.364827	0.506128	-0.242816	1.16376	1.67571	1.34304	0.470656	0.0858466	-0.0218606	0.0273519	0.561047	0.642612	0.258501	0.34931	0.1842	-0.0880509	-0.169318	-0.0760063	-0.0667602	-0.00943737
1-stearoyl-GPE (18:0)	Lipid	Lysophospholipid	0	-0.187355	0.060021	-0.190569	-0.140474	0.0551731	0.254302	0.462046	-0.0366705	1.01116	1.51773	1.24863	0.311264	-0.223803	-0.342591	0.118602	0.42903	0.490104	0.218784	0.41229	0.140172	0.146889	-0.337894	-0.102061	-0.208976	-0.195659
1-stearoyl-GPI (18:0)	Lipid	Lysophospholipid	0	-0.042285	0.0741334	-0.225682	-0.212174	-0.20104	-0.117051	0.207634	0.678317	1.36075	1.7793	1.18407	0.365752	0.140716	-0.0477672	-0.155628	0.157363	0.0528569	-0.285101	0.239372	-0.00785218	-0.296562	-0.389489	0.0209623	-0.147706	-0.435836
1-(1-enyl-palmitoyl)-GPC (P-16:0)*	Lipid	Lysoplasmalogen	0	-0.0612309	-0.102768	-0.110355	-0.493755	-0.380475	-0.301931	-0.744175	-1.38797	-0.455494	0.641791	0.405493	0.163599	-0.469685	-0.921313	-0.750362	-0.465787	-0.485535	-0.398939	-0.621855	-0.452524	-0.479023	-0.346721	-0.328638	-0.382594	-0.298993
1-(1-enyl-palmitoyl)-GPE (P-16:0)*	Lipid	Lysoplasmalogen	0	-0.27712	-0.248052	-0.325883	-0.212077	0.0494463	0.386617	0.51118	0.310874	1.04589	1.3795	1.33125	0.562448	0.327836	0.293336	0.317658	0.407233	0.29271	0.0962499	0.198557	-0.157689	-0.0222552	-0.0815513	-0.143898	-0.0712024	-0.204635
1-(1-enyl-stearoyl)-GPE (P-18:0)*	Lipid	Lysoplasmalogen	0	0.0556839	-0.18678	-0.8445	-0.862121	-0.24309	0.0442084	0.535652	-0.111356	0.63006	1.37262	0.73619	0.471353	-0.146913	-0.178548	-0.420006	-0.02969	-0.0814107	-0.335529	-0.168956	-0.895695	-0.406518	-0.470226	-0.475085	-0.603716	-0.377962
1-linoleoylglycerol (18:2)	Lipid	Monoacylglycerol	0	-0.204763	0.361239	-0.272021	-0.401337	0.144033	1.04695	1.77413	1.64755	1.4429	2.16349	1.22675	-0.0602564	-0.905472	-1.02962	-0.589023	-0.0972827	-0.668893	-0.236897	-0.792676	-1.01115	-0.615923	-0.729457	-0.560222	-0.793541	-0.754919
2-arachidonoylglycerol (20:4)	Lipid	Monoacylglycerol	0	-0.918691	-2.40159	-0.863526	-0.486218	-0.145755	0.0386393	0.578626	1.12951	0.96366	1.79512	0.747434	-0.682472	-0.729209	-2.40159	-0.442172	-0.305376	-0.663545	-1.08936	-1.34227	-0.34868	-0.705429	-0.373744	-0.481638	-1.04307	-1.1288
1-arachidonylglycerol (20:4)	Lipid	Monoacylglycerol	0	-0.0904664	-0.541084	0.198766	-0.480758	0.374254	0.547395	1.20485	1.82596	1.14707	2.24752	0.812811	0.25774	0.0258086	-0.218177	-0.0756425	0.441542	0.307114	0.258777	-0.165172	-0.368555	-0.0219554	-0.0126327	0.100244	0.219454	-0.571562
1-docosahexaenoylglycerol (22:6)	Lipid	Monoacylglycerol	0	-0.176686	-0.957776	0.25824	-0.319961	0.689979	0.616802	1.88218	3.07497	3.29412	4.20753	2.44872	1.34595	0.738123	0.446424	1.02537	1.0887	0.957338	-0.27163	-0.575153	-0.566895	-0.144073	0.246379	-0.591462	-0.435486	-1.79824
1-linolenoylglycerol (18:3)	Lipid	Monoacylglycerol	0	0.248932	0.190771	-0.540751	-0.618642	-0.481802	1.04375	1.40613	1.45152	0.923571	1.31709	0.71204	-0.515946	-1.49468	-1.47109	-1.44701	-0.285643	-0.8159	-0.246062	-1.22927	-1.31882	-1.76534	-1.0611	-0.636902	-1.10696	-0.983529
1-oleoylglycerol (18:1)	Lipid	Monoacylglycerol	0	-0.134391	0.0685447	-0.304271	-0.483983	-0.21934	0.720874	1.11175	1.03878	0.878043	1.49868	0.675819	-0.637897	-0.880737	-0.622542	-0.895706	-0.218964	-0.849119	-0.437387	-1.0697	-1.40447	-0.872817	-1.12931	-0.686182	-0.446322	-0.686356
1-palmitoleoylglycerol (16:1)*	Lipid	Monoacylglycerol	0	0.428228	0.24794	0.776209	0.462122	0.163682	0.945555	1.39133	0.901282	1.12918	0.927262	-0.202154	-0.738109	-0.259172	-0.586677	-0.630348	-0.39309	-0.644055	-0.463584	-0.692094	-1.07744	-0.97428	-0.78332	-0.648653	-0.454498	-0.505717
1-palmitoylglycerol (16:0)	Lipid	Monoacylglycerol	0	0.585367	-1.1154	0.884867	0.390687	0.628702	1.12376	1.38112	1.67989	1.79051	2.33218	1.46799	1.11963	0.623671	0.274516	0.34995	0.781505	0.685937	0.377485	0.235884	0.0123236	-0.540988	0.428864	0.492344	0.520361	-1.1154
2-docosahexaenoylglycerol (22:6)*	Lipid	Monoacylglycerol	0	-0.39698	-2.09616	-1.31825	-1.23424	-0.228589	-0.0826038	1.42205	2.11095	2.77166	3.88256	2.08702	0.601155	-0.661208	-0.739186	0.233495	0.272232	-0.478872	-1.39512	-0.840258	-1.50014	-2.09616	-1.27033	-0.855293	-1.67538	-2.09616
2-palmitoylglycerol (16:0)	Lipid	Monoacylglycerol	0	0	0	0	1.00913	0	0	0	2.47112	3.33179	3.76519	2.7949	0.900246	1.36845	0	0.485987	0	1.14962	0	0	1.14431	0	1.20023	0	0	0
1-linoleoyl-2-arachidonoyl-GPC (18:2/20:4n6)*	Lipid	Phosphatidylcholine (PC)	0	-0.249109	-0.137325	-0.212646	-0.470638	-0.348492	-0.593088	-0.905062	-1.56025	-1.06142	-0.82804	-0.363225	-0.125693	-0.80072	-0.689653	-0.76135	-0.414293	-0.605959	-0.644751	-0.373324	-0.246057	-0.172162	-0.135114	-0.165628	-0.053975	-0.051193
1-oleoyl-2-linoleoyl-GPC (18:1/18:2)*	Lipid	Phosphatidylcholine (PC)	0	-0.30208	-0.238515	-0.150564	-0.264924	-0.393169	-0.457607	-0.488549	-1.17987	-1.02839	-1.27818	-0.68093	-0.248264	-0.240329	-0.205725	-0.423334	-0.536641	-0.800918	-0.523006	-0.417162	-0.369142	-0.387986	-0.311724	-0.19588	0.000329395	0.0827916
1-palmitoyl-2-gamma-linolenoyl-GPC (16:0/18:3n6)*	Lipid	Phosphatidylcholine (PC)	0	-0.0348786	0.0746154	-0.134652	-0.0802798	-0.113159	0.1464	0.0234777	-0.632616	-0.356896	-0.724144	-0.711929	-0.712119	-0.0974321	-0.834232	-0.589378	-0.246376	-0.270386	-0.613141	-0.608888	-0.601475	-0.610304	-0.528196	-0.210356	-0.785419	-0.348155
1-palmitoyl-2-stearoyl-GPC (16:0/18:0)	Lipid	Phosphatidylcholine (PC)	0	-0.043094	0.222591	-0.137169	0.0406265	0.0813249	0.390221	-0.0194801	-0.803046	-0.590891	-0.536979	-0.287575	-0.120579	-0.423041	-0.456459	-0.171562	-0.0586675	-0.0525912	-0.0505714	0.0813249	0.183411	0.0578465	0.0476469	0.0307129	-0.133347	-0.111076
1,2-dilinoleoyl-GPC (18:2/18:2)	Lipid	Phosphatidylcholine (PC)	0	0.345687	0.0446871	-0.16694	0.0142968	-0.028067	0.0164225	-0.380191	-1.03589	-0.544578	-0.494722	-0.254252	0.420231	-0.00578559	-0.11541	-0.261961	-0.284027	-0.301131	-0.182857	-0.143316	-0.397244	-0.278478	0.191486	0.0900513	0.076744	-0.106275
1-palmitoyl-2-oleoyl-GPC (16:0/18:1)	Lipid	Phosphatidylcholine (PC)	0	0.196328	0.0376137	0.095917	0.266671	-0.0246043	0.210866	0.179108	0.312586	1.01064	0.893306	0.411326	0.0643938	0.516167	0.506995	0.314767	0.586875	0.297226	0.12472	0.110317	-0.164137	-0.180668	-0.0501307	-0.0796511	-0.101895	0.0298254
1-palmitoyl-2-palmitoleoyl-GPC (16:0/16:1)*	Lipid	Phosphatidylcholine (PC)	0	0.334103	0.163302	0.43981	0.412412	0.141118	0.149853	0.228306	0.524004	1.41579	0.913328	0.583351	0.49179	0.875877	0.737165	0.180455	0.419653	0.199438	0.113361	0.179131	-0.19405	-0.190814	-0.288545	-0.207066	0.177217	0.130049
1-stearoyl-2-oleoyl-GPC (18:0/18:1)	Lipid	Phosphatidylcholine (PC)	0	-0.326768	0.0356794	0.0108218	0.0754209	-0.13662	0.0760201	-0.100149	-0.163246	0.6312	0.245732	-0.102995	-0.621741	-0.676607	0.0712191	0.228694	-0.00607558	-0.158586	-0.139956	-0.273734	-0.478999	-0.382154	-0.438553	-0.245309	-0.154785	-0.25101
1,2-dipalmitoyl-GPC (16:0/16:0)	Lipid	Phosphatidylcholine (PC)	0	0.315909	0.199783	0.234979	0.168737	0.412516	0.592803	0.632613	0.454163	0.907818	0.835896	0.792564	0.917668	0.627142	0.151963	0.364316	0.495213	0.531646	0.323177	0.680187	0.542897	0.473455	0.656212	0.505474	0.495356	0.483294
1-linoleoyl-2-arachidonoyl-GPE (18:2/20:4)*	Lipid	Phosphatidylethanolamine (PE)	0	0.691149	0.756585	0.799425	0.909992	0.638045	1.06545	0.444092	0.218294	0.198827	0.442153	-0.0515239	-0.2924	-0.495444	-0.460443	-0.458026	-0.609868	-0.33921	-0.0584617	-0.245809	-0.135905	0.280532	0.590984	0.572076	0.534349	0.769014
1-oleoyl-2-arachidonoyl-GPE (18:1/20:4)*	Lipid	Phosphatidylethanolamine (PE)	0	0.286347	0.47984	0.33621	0.535501	0.382615	0.422751	0.619382	0.386335	1.38771	1.11125	0.203486	-0.205939	-0.466983	-0.313812	-0.190668	0.262555	0.115076	0.077728	0.394979	0.145477	0.483061	0.525539	0.311784	0.484347	0.477646
1-oleoyl-2-linoleoyl-GPE (18:1/18:2)*	Lipid	Phosphatidylethanolamine (PE)	0	0.503466	-0.075551	0.150825	0.106029	-0.0674094	0.238682	0.596794	0.16734	1.02474	0.517607	0.198734	0.273585	0.410342	-0.0499787	-0.432185	0.0157202	-0.243701	-0.163065	-0.0490165	-0.236198	-0.401977	0.423343	0.37529	0.238944	0.0317257
1-palmitoyl-2-arachidonoyl-GPE (16:0/20:4)*	Lipid	Phosphatidylethanolamine (PE)	0	0.2094	0.333775	0.152416	0.0581269	0.164555	0.461533	1.08291	0.826394	2.01981	1.99408	0.57557	-0.139173	-0.370356	-0.40998	-0.0940349	0.481906	0.267104	0.0773589	0.390964	0.0584442	0.0402426	0.342662	0.213965	0.0547904	0.0984999
1-palmitoyl-2-linoleoyl-GPE (16:0/18:2)	Lipid	Phosphatidylethanolamine (PE)	0	0.580455	0.267393	-0.143551	0.21089	0.0364608	0.489187	1.03567	0.981995	2.11903	1.67722	0.831437	0.278298	0.439314	-0.0491396	-0.515805	0.414875	-0.0440993	0.152524	0.219997	-0.127825	-0.407844	0.37955	0.313935	0.0732603	-0.0850959
1-stearoyl-2-arachidonoyl-GPE (18:0/20:4)	Lipid	Phosphatidylethanolamine (PE)	0	0.0472948	0.353564	-0.0905026	0.0182718	0.139925	0.406832	1.03145	1.25374	2.28478	2.35857	0.93857	-0.106033	-0.667583	-0.531152	-0.0482001	0.634813	0.337632	0.257061	0.465797	0.308914	0.0806991	0.227973	0.302772	-0.0028707	0.0196037
1-stearoyl-2-linoleoyl-GPE (18:0/18:2)*	Lipid	Phosphatidylethanolamine (PE)	0	0.488641	0.0262716	-0.202178	0.0146375	-0.190764	0.324194	0.569349	0.513653	1.3196	1.07051	0.65223	0.294388	0.116962	-0.0286335	-0.201825	0.376128	-0.017422	0.175805	0.243517	-0.152787	-0.637634	0.232341	0.17064	0.0144858	-0.205532
1-stearoyl-2-oleoyl-GPE (18:0/18:1)	Lipid	Phosphatidylethanolamine (PE)	0	0.244371	0.219802	0.363549	0.287436	-0.157196	0.680235	0.64376	0.310113	1.01729	0.770496	0.347259	0.240441	-0.0403168	-0.0627464	-0.169404	0.351035	-0.23846	0.139848	0.00288283	-0.520609	-0.323773	0.426813	-0.0104584	-0.0154731	-0.186634
1,2-dipalmitoyl-GPE (16:0/16:0)*	Lipid	Phosphatidylethanolamine (PE)	0	1.33574	1.92058	1.92232	1.79602	2.20957	2.39895	2.00208	1.11067	0	1.41476	1.23133	0	0	0	0	0	0	0	0.299094	0	0	0.804467	0.73679	0	0
1-stearoyl-2-linoleoyl-GPI (18:0/18:2)	Lipid	Phosphatidylinositol (PI)	0	0.415574	0.325061	-0.09989	0.11623	-0.0110335	0.060121	-0.236604	-1.27258	-0.517276	-0.48803	-0.234394	0.301327	-0.0352788	-0.230772	-0.364333	-0.0577046	-0.231244	0.182455	0.00762024	-0.430716	-0.634945	0.131116	0.0976847	-0.0930111	-0.317478
1-palmitoyl-2-arachidonoyl-GPI (16:0/20:4)*	Lipid	Phosphatidylinositol (PI)	0	0.13842	0.123019	-0.372342	0.0519474	-0.214177	-0.0585334	-0.0200277	-0.0327982	0.60073	0.71243	0.495685	0.108921	0.54334	-0.0947053	0.0350262	0.294751	0.327394	0.164502	0.172325	0.0216004	-0.211004	-0.18112	-0.0430076	-0.20967	-0.367685
1-stearoyl-2-arachidonoyl-GPI (18:0/20:4)	Lipid	Phosphatidylinositol (PI)	0	-0.0794955	0.238713	-0.154677	-0.028977	-0.0645651	-0.273564	-0.0838112	0.108722	0.728814	0.834638	0.442651	-0.118809	-0.378427	-0.269151	0.00617437	0.167251	0.196998	-0.0905335	0.110156	0.102579	0.0651633	-0.0858992	-0.134006	-0.113323	-0.156871
choline	Lipid	Phospholipid Metabolism	0	0.0633073	0.153118	0.191948	0.0903821	0.0739414	-0.14511	0.0129526	0.227597	0.296219	0.260272	0.381187	0.272634	0.516448	0.668132	0.561797	0.552034	0.479113	0.582256	0.383909	0.32159	0.279889	0.355003	0.127206	0.0475346	0.0231319
choline phosphate	Lipid	Phospholipid Metabolism	0	0.0288267	0.331612	-0.0152718	-0.041904	0.493789	0.549668	1.39815	0.469081	0.360987	0.192863	0.217025	-0.127993	-0.00523147	0.280154	0.356915	0.226388	0.132647	0.163634	0.0350178	-0.231016	0.220289	0.147581	0.0528234	0.0391819	0.109513
glycerophosphoethanolamine	Lipid	Phospholipid Metabolism	0	0.215489	0.301289	0.0029297	0.0369153	0.294879	0.624793	0.590999	0.465069	0.96803	0.922725	0.802818	0.792061	0.807538	0.772344	0.630606	0.441238	0.487076	0.657117	0.417007	-0.0386376	0.345381	0.165866	0.0259756	-0.200654	0.217698
phosphoethanolamine	Lipid	Phospholipid Metabolism	0	-0.0882532	0.0369096	-0.152445	0.0316186	0.572021	0.533859	1.09251	1.10348	0.943272	0.549615	0.527483	0.233598	0.322939	0.392971	0.701162	0.421435	0.633503	0.325247	0.632222	0.165664	0.500927	0.185493	0.209434	0.0477834	0.00324728
1-(1-enyl-palmitoyl)-2-arachidonoyl-GPC (P-16:0/20:4)*	Lipid	Plasmalogen	0	-0.377448	-0.17508	-0.127809	-0.310074	-0.447684	-0.51797	-1.04353	-1.56521	-1.30038	-1.22709	-0.267534	0.303257	-1.47641	-1.11996	-1.07579	-0.833411	-0.734603	-0.500227	-0.744113	-0.3325	-0.29615	-0.212325	-0.311407	-0.610936	-0.44227
1-(1-enyl-palmitoyl)-2-linoleoyl-GPC (P-16:0/18:2)*	Lipid	Plasmalogen	0	0.112602	-0.0601741	-0.0129743	0.187044	-0.220512	-0.0836757	-1.28782	-2.33414	-1.8753	-2.45927	-1.10185	-0.62815	-0.501054	-0.543294	-0.841262	-0.559679	-0.693875	-0.48547	-0.708521	-0.853761	-0.525999	-0.073932	-0.0765621	-0.345537	-0.393349
1-(1-enyl-palmitoyl)-2-linoleoyl-GPE (P-16:0/18:2)*	Lipid	Plasmalogen	0	-1.96943	0.0527179	-0.250814	-0.00647959	-0.111474	-0.174507	-1.58551	-1.96943	-1.96943	-1.96943	-1.96943	-1.45571	-1.07397	-0.86176	-0.558632	-0.926515	-0.863752	-0.362461	-1.83278	-0.875766	-0.749549	-0.215015	-0.133062	-0.361475	-0.219984
1-(1-enyl-palmitoyl)-2-oleoyl-GPC (P-16:0/18:1)*	Lipid	Plasmalogen	0	-0.142833	0.0620489	0.261673	0.104197	0.0597252	0.102416	-0.402126	-0.601191	0.188221	0.152628	0.428592	0.721472	-0.00664897	-0.409224	-0.894854	-1.12255	-0.650401	-0.737689	-1.04918	-0.466241	0.0713063	-0.358784	-0.371931	-0.327232	-0.194888
1-(1-enyl-palmitoyl)-2-oleoyl-GPE (P-16:0/18:1)*	Lipid	Plasmalogen	0	-0.0497422	0.0316714	0.0879119	0.299337	0.213993	0.128248	-0.36097	-1.21502	-0.947753	-1.07378	-0.728044	-0.572332	-0.919989	-0.593362	-0.386663	-0.487867	-0.422199	-0.249452	-0.643271	-0.416105	-0.263429	0.21463	0.338533	-0.129949	0.273486
1-(1-enyl-palmitoyl)-2-palmitoyl-GPC (P-16:0/16:0)*	Lipid	Plasmalogen	0	-0.0293021	0.0239491	0.0762264	0.0851506	0.0231299	0.234653	-0.146078	-0.294264	0.0469699	0.134915	0.192038	0.320512	-0.220936	-0.869896	-0.889817	-0.878291	-0.651859	-0.494588	-0.563883	-0.131714	-0.0765229	-0.0612376	0.0784626	-0.0977524	-0.125947
1-(1-enyl-stearoyl)-2-arachidonoyl-GPE (P-18:0/20:4)*	Lipid	Plasmalogen	0	-0.0369044	-0.0936562	-0.424519	-0.175707	-0.123594	0.121503	-0.215827	-0.83083	-0.247327	-0.048853	0.107108	-0.0774949	-1.16805	-1.22964	-0.872693	-0.584143	-0.367482	-0.382066	-0.512031	-0.386807	-0.301598	-0.117607	-0.211615	-0.143644	-0.419026
1-(1-enyl-stearoyl)-2-linoleoyl-GPE (P-18:0/18:2)*	Lipid	Plasmalogen	0	0.130591	-0.0873347	-0.209635	-0.0307372	-0.224596	0.0269692	-0.397602	-1.25201	-1.01557	-0.959124	-0.396402	-0.389672	-0.904799	-0.607346	-0.560567	-0.652109	-0.493445	-0.319623	-0.501001	-0.378375	-0.354004	-0.0314355	-0.167962	-0.380894	-0.241868
arachidonate (20:4n6)	Lipid	Polyunsaturated Fatty Acid (n3 and n6)	0	-0.293773	-0.0460518	-0.303088	-0.56808	-0.313639	0.295487	0.53197	0.743954	0.559051	0.927624	0.305001	-0.808865	-1.0872	-0.856495	-0.658396	-0.250756	-0.595176	-0.207617	-0.489883	-0.623702	-0.567553	-0.498718	-0.30938	-0.622062	-0.675683
dihomo-linolenate (20:3n3 or n6)	Lipid	Polyunsaturated Fatty Acid (n3 and n6)	0	-0.34486	-0.422565	-0.405359	-0.526882	-0.56933	0.300323	0.430521	0.315366	0.442726	0.596959	-0.270281	-1.0005	-1.26968	-0.682704	-0.677732	-0.425251	-0.786459	-0.72064	-0.617513	-1.03783	-0.915904	-0.841724	-0.796161	-0.527459	-0.96763
docosahexaenoate (DHA; 22:6n3)	Lipid	Polyunsaturated Fatty Acid (n3 and n6)	0	-0.361998	-0.398626	-0.769539	-0.721171	-0.936582	-0.269246	-0.396046	0.49247	0.71125	1.52508	0.517385	-0.878289	-1.44819	-1.08548	-0.837138	-0.459042	-0.723816	-0.680068	-0.365665	-1.03534	-0.77045	-0.990414	-0.910067	-0.789873	-0.942732
docosapentaenoate (n6 DPA; 22:5n6)	Lipid	Polyunsaturated Fatty Acid (n3 and n6)	0	0.103027	-0.435716	-0.281253	-0.680122	-0.515314	0.218996	0.0634332	0.380856	0.0121231	1.0504	-0.023208	-0.944548	-1.04294	-0.405387	0.152991	0.283302	-0.045551	0.00264936	0.0630871	-0.531774	-0.324069	-0.368661	-0.349184	-0.135901	-0.651061
eicosapentaenoate (EPA; 20:5n3)	Lipid	Polyunsaturated Fatty Acid (n3 and n6)	0	-0.237273	-0.029492	-0.384779	-0.171094	-0.531127	0.430845	0.243739	0.278414	-0.0948905	0.385201	-0.0531178	-1.08637	-1.38288	-1.05971	-1.20494	-0.525732	-0.883205	-0.852304	-0.647705	-0.866251	-0.863224	-0.981113	-0.788288	-0.713131	-0.781844
linolenate [alpha or gamma; (18:3n3 or 6)]	Lipid	Polyunsaturated Fatty Acid (n3 and n6)	0	0.420033	-0.178888	-0.264224	-0.254778	-0.344434	0.727579	0.507832	0.266766	0.271227	0.184214	-0.189022	-1.35683	-1.30222	-0.463025	-0.711721	-0.496356	-0.432296	-0.336903	-0.438793	-0.442052	-0.671636	-0.684445	-0.0651549	-0.478399	-0.669269
mead acid (20:3n9)	Lipid	Polyunsaturated Fatty Acid (n3 and n6)	0	0.116541	-0.158243	-0.109577	-0.11667	-0.144999	0.666174	0.460602	0.271357	0.1217	0.681347	-0.224262	-1.22705	-0.6474	-0.343097	-0.136062	-0.0951139	-0.288487	-0.516619	-0.667523	-1.02429	-0.651889	-0.828433	-0.62461	-0.134098	-0.638464
stearidonate (18:4n3)	Lipid	Polyunsaturated Fatty Acid (n3 and n6)	0	-0.0391267	-0.0528221	-0.00149693	0.0410049	-0.264511	0.73261	0.194365	-0.0481737	0.263383	-0.43607	-1.2949	-1.69703	-1.6089	-1.57671	-0.783662	-0.516113	-0.625114	-0.466481	-0.721818	-0.90318	-0.703835	-0.76897	-0.595273	-0.784521	-0.840218
adrenate (22:4n6)	Lipid	Polyunsaturated Fatty Acid (n3 and n6)	0	0.682664	-1.31813	-1.31813	-0.859846	-0.508062	1.07399	0.893491	1.24594	1.0627	1.44804	1.01515	0.270347	-1.31813	-1.31813	0.31489	0.00759315	0.702033	-0.44769	0.992792	-0.770555	-1.31813	-0.278342	-0.029483	0.721274	0.0929508
dihomo-linoleate (20:2n6)	Lipid	Polyunsaturated Fatty Acid (n3 and n6)	0	0.182413	-0.0557653	-0.206611	-0.435174	-0.189209	0.423365	0.404245	0.616036	0.962064	1.34263	0.607656	-0.203563	-0.0602572	0.3051	0.147654	0.244355	-0.287204	0.0117828	0.0802644	-0.62197	-0.279074	-0.415919	-0.268976	-0.18588	-0.341018
docosadienoate (22:2n6)	Lipid	Polyunsaturated Fatty Acid (n3 and n6)	0	0.126961	0.150798	-0.212877	-0.581171	0.0227639	0.791516	0.565352	1.21932	1.54145	1.74707	0.624473	0.78425	0.79266	0.535939	0.334419	0.456608	0.187498	0.556961	0.21904	-0.406698	-0.220935	-0.0902511	-0.166751	-0.106509	-0.265876
docosapentaenoate (n3 DPA; 22:5n3)	Lipid	Polyunsaturated Fatty Acid (n3 and n6)	0	-0.440223	-0.234982	-0.737952	-0.425484	-0.827832	0.0697186	0.158062	0.73339	0.682033	1.27243	0.538296	-0.522115	-0.897406	-0.585932	-0.449947	-0.152139	-0.694698	-0.509712	-0.0628832	-0.980942	-0.818264	-1.14885	-0.907516	-0.905221	-0.891904
linoleate (18:2n6)	Lipid	Polyunsaturated Fatty Acid (n3 and n6)	0	-0.0444398	-0.0404672	-0.117885	-0.102237	-0.147488	0.91522	0.558201	0.711631	0.866515	1.08535	0.201877	-0.866202	-0.809385	-0.734883	-0.736655	-0.322061	-0.167516	-0.146457	-0.173954	-0.405404	-0.520323	-0.632355	-0.110686	-0.264845	-0.477838
behenoyl dihydrosphingomyelin (d18:0/22:0)*	Lipid	Sphingolipid Metabolism	0	0.0157769	0.379912	0.0570241	0.299129	0.158159	0.726085	0.157501	0.352103	2.2015	0.615387	0.219241	-0.193527	-0.740691	-1.2377	-1.16706	-0.698128	-0.243601	-0.0695083	0.249581	-0.14286	-0.0265348	0.0566005	-0.63952	-0.63792	-0.350222
lignoceroyl sphingomyelin (d18:1/24:0)	Lipid	Sphingolipid Metabolism	0	0.0819343	0.404984	0.197757	0.184104	-0.0420166	0.293266	-0.171094	0.0118254	0.429767	-0.00207945	-0.234291	-0.540245	-0.772274	-0.477109	-0.44382	-0.264638	-0.0122225	0.0988033	0.202021	0.305568	0.308208	0.180572	-0.0117735	-0.0538314	-0.00431077
N-palmitoyl-sphinganine (d18:0/16:0)	Lipid	Sphingolipid Metabolism	0	0.660704	0.242074	0.203093	0.27319	0.0799749	1.33545	1.22091	0.236843	1.11773	-0.35087	-0.123356	0.620125	0.449636	-0.210767	-0.707498	-0.255913	-0.507983	-0.0555778	0.0655114	-0.392967	-0.857699	0.456018	0.421012	-0.137534	-0.600407
sphingomyelin (d17:1/16:0, d18:1/15:0, d16:1/17:0)*	Lipid	Sphingolipid Metabolism	0	0.0472486	0.0235691	-0.0385561	-0.233261	-0.0787049	0.207765	-0.138389	-0.297675	0.0694621	0.0370598	-0.145222	-0.125232	-0.546671	-0.893554	-0.780898	-0.683289	-0.674184	-0.370809	-0.651373	-0.362173	-0.411923	-0.179881	-0.186195	-0.275322	-0.252707
sphingomyelin (d18:1/14:0, d16:1/16:0)*	Lipid	Sphingolipid Metabolism	0	-0.330935	0.048066	-0.0625547	-0.230065	-0.0829342	0.317552	0.125119	0.0544981	1.06998	0.819033	0.375118	-0.074202	-0.741787	-0.740549	-0.83801	-0.415819	-0.497275	-0.617478	-0.592883	-0.367887	-0.289616	-0.383098	-0.372194	-0.273564	-0.20894
sphingomyelin (d18:1/21:0, d17:1/22:0, d16:1/23:0)*	Lipid	Sphingolipid Metabolism	0	-0.0362401	0.199748	0.0200454	0.34478	-0.131781	0.114696	-0.542438	-0.34959	0.318804	-0.264125	-0.313901	-0.708356	-1.01895	-1.17489	-1.08047	-0.683481	-0.382306	-0.250654	-0.411986	-0.0915087	0.0273546	0.0502588	-0.135721	-0.0762836	-0.302555
sphingomyelin (d18:2/16:0, d18:1/16:1)*	Lipid	Sphingolipid Metabolism	0	-0.43587	-0.149905	-0.218315	-0.397148	-0.121779	0.0510169	-0.0321722	0.0309932	1.0975	0.932369	0.710019	0.319024	-0.770884	-0.977383	-0.816527	-0.541732	-0.515009	-0.52357	-0.640128	-0.327883	-0.246526	-0.406005	-0.187864	-0.367437	-0.301653
sphingomyelin (d18:2/23:0, d18:1/23:1, d17:1/24:1)*	Lipid	Sphingolipid Metabolism	0	-0.0611166	0.125275	0.134775	0.0428061	-0.259334	0.115098	-0.420691	-0.44752	0.265808	-0.10947	-0.107172	-0.369517	-0.703592	-0.646149	-0.693642	-0.451159	-0.348154	-0.156527	-0.294045	0.0945248	0.0745402	0.0186704	0.0408641	-0.0877794	-0.0609776
tricosanoyl sphingomyelin (d18:1/23:0)*	Lipid	Sphingolipid Metabolism	0	-0.365571	0.0574686	-0.124952	0.383035	0.134485	0.0978828	-0.373443	0.0988946	1.33366	0.234431	-0.0862025	-0.918787	-1.59012	-1.08233	-0.523207	-0.79616	-0.273334	-0.332119	0.208535	0.381789	0.482038	-0.0332834	-0.406263	-0.343928	-0.34101
behenoyl sphingomyelin (d18:1/22:0)*	Lipid	Sphingolipid Metabolism	0	0.0316131	0.291507	0.169798	0.191095	0.00813063	0.348331	0.114837	0.318565	1.06839	0.271381	0.312143	-0.194533	-0.724571	-0.551357	-0.399736	0.0343227	0.307934	0.224139	0.255896	0.351913	0.371205	0.256852	0.0328889	-0.187831	0.00618345
glycosyl-N-palmitoyl-sphingosine (d18:1/16:0)	Lipid	Sphingolipid Metabolism	0	-0.21427	0.246192	-0.517466	0.0274679	0.68626	0.907784	1.71562	2.37547	3.72849	3.66933	3.04484	2.07231	1.17871	0.864495	1.18892	1.44253	1.06021	0.470445	1.21049	0.278409	-0.072243	-0.151321	0.0748527	-0.119119	0.194888
glycosyl-N-stearoyl-sphingosine (d18:1/18:0)	Lipid	Sphingolipid Metabolism	0	-0.335958	0.35905	-0.314543	0.408082	0.922923	0.471336	0.88448	1.10727	3.01768	3.24799	2.40502	0.802051	-1.14049	-0.171025	0.451053	0.0495695	0.322571	-0.372297	0.0123013	-0.200086	-0.560381	-0.605243	-0.930135	-0.777003	0.0324628
glycosyl-N-tetracosadienoyl-sphingosine (d18:1/24:2)*	Lipid	Sphingolipid Metabolism	0	-0.0184137	-0.00435202	-0.240613	0.0811528	0.369617	0.456184	0.977294	1.57256	2.71619	2.94979	2.47123	2.07823	1.42739	1.48122	1.13192	1.20328	1.139	0.857697	1.3285	0.470781	0.616781	0.302217	0.143769	0.296269	0.551803
lactosyl-N-palmitoyl-sphingosine (d18:1/16:0)	Lipid	Sphingolipid Metabolism	0	0	0	0	0	0	0	2.28289	2.51596	3.00942	2.98001	2.53904	2.05974	0	0	0	0.672326	0	0	1.50392	0.0170379	0	0	0	0	0
N-palmitoyl-sphingosine (d18:1/16:0)	Lipid	Sphingolipid Metabolism	0	0.128422	0.133733	-0.372373	0.15779	0.076211	0.912906	1.46699	1.14198	2.62557	1.82987	1.54263	1.12511	0.691013	0.224028	0.576063	0.320059	0.670229	0.307865	0.393551	0.0553288	-0.373514	-0.00901743	0.100417	-0.513441	-0.359426
N-stearoyl-sphingosine (d18:1/18:0)*	Lipid	Sphingolipid Metabolism	0	-1.12218	-0.385871	-1.35834	0.743423	1.56647	1.58476	2.50767	2.59705	3.94258	2.98377	2.40562	1.7745	0.401718	0.402851	1.56738	1.29599	1.54116	0.944099	1.39615	0.245702	-0.519075	-1.01234	0.109866	-0.750512	-1.35834
N-tetracosadienoyl-sphingosine (d18:1/24:2)*	Lipid	Sphingolipid Metabolism	0	-0.0585074	0.116659	-0.124533	0.201432	0.692517	0.893704	1.50048	1.3502	2.23701	1.58699	1.24501	1.29568	1.11913	0.980595	1.16523	1.11147	0.921537	0.954141	1.06663	0.623402	0.543463	0.201008	0.0318521	0.088252	0.23063
palmitoyl dihydrosphingomyelin (d18:0/16:0)*	Lipid	Sphingolipid Metabolism	0	0.0266846	0.066202	-0.149882	-0.286167	0.00521225	0.369637	0.514518	0.318984	1.42647	0.706947	0.468386	0.486643	0.00835791	-0.489142	-0.398687	-0.166905	-0.162438	-0.148054	-0.00330168	-0.164901	-0.204254	-0.0633436	-0.0189494	-0.234005	-0.319903
palmitoyl sphingomyelin (d18:1/16:0)	Lipid	Sphingolipid Metabolism	0	-0.0361535	0.0461535	-0.0807367	0.041898	0.155328	0.46218	0.591303	0.770847	1.37848	1.19947	0.856979	0.433564	-0.0874723	-0.161684	0.0427795	0.062182	0.18863	-0.0425278	0.0620371	0.0988093	0.00468236	0.172209	0.0237078	-0.0973113	0.0486423
sphinganine	Lipid	Sphingolipid Metabolism	0	-0.0542378	0.423475	0.525803	0.921755	1.52978	1.77058	1.85631	1.20986	1.03186	1.54875	2.17123	1.8922	1.32971	1.31827	1.15489	0.926502	1.65892	1.33632	1.38323	0.428149	0.234315	0.197414	-0.0451962	0.454883	0.600979
sphinganine-1-phosphate	Lipid	Sphingolipid Metabolism	0	0.0922002	0.550856	0.268364	0.206102	0.661589	1.24257	1.72049	1.50812	1.02567	1.27552	1.25975	1.20837	0.748147	0.866536	0.843926	1.19483	1.55998	1.335	1.58261	0.646716	0.224306	0.0310221	0.0370143	0.237666	0.335093
sphingomyelin (d18:0/18:0, d19:0/17:0)*	Lipid	Sphingolipid Metabolism	0	-0.277359	0.133958	-0.21491	0.359634	0.441165	1.17146	1.29537	1.9699	4.37763	2.95717	1.95267	0.960956	-0.675996	-0.73865	-0.467134	-0.277884	0.185486	-0.639804	-0.115754	-0.282439	-0.49716	-0.0918788	-0.135111	-0.45799	-0.337886
sphingomyelin (d18:1/17:0, d17:1/18:0, d19:1/16:0)	Lipid	Sphingolipid Metabolism	0	-0.0793849	-0.0546338	-0.237044	-0.161847	0.154474	0.402304	0.286766	0.493458	1.13931	0.98765	0.574284	0.415625	-0.329687	-0.730211	-0.48598	-0.208504	-0.0644256	-0.386534	-0.20627	-0.0600975	-0.232167	-0.169131	-0.173332	-0.244718	-0.271655
sphingomyelin (d18:1/18:1, d18:2/18:0)	Lipid	Sphingolipid Metabolism	0	-0.113088	0.0663248	0.000860711	0.181644	0.198248	0.468768	0.294871	0.453654	0.925652	0.90373	0.632389	0.168681	-0.67023	-0.460024	-0.394615	-0.373641	-0.130261	-0.255364	-0.368074	-0.131518	-0.29337	-0.127907	-0.186794	-0.211504	-0.331502
sphingomyelin (d18:1/19:0, d19:1/18:0)*	Lipid	Sphingolipid Metabolism	0	-0.504063	-0.146907	-0.495336	-0.259929	-0.201851	0.314916	-0.165374	0.142772	1.77412	1.14137	0.372821	0.00433688	-1.72279	-1.40479	-1.04457	-0.593848	-0.305393	-0.810473	-0.650853	-0.409637	-0.345494	-0.689594	-0.310486	-0.825384	-0.75194
sphingomyelin (d18:1/20:0, d16:1/22:0)*	Lipid	Sphingolipid Metabolism	0	-0.25364	0.0786025	-0.180197	-0.0939431	-0.002888	0.370107	0.0771707	0.0914254	1.19383	0.983488	0.455342	-0.112389	-1.15031	-0.915555	-0.369022	-0.280923	0.0871638	-0.0861926	-0.11566	-0.0682203	-0.0270422	-0.182534	-0.266969	-0.385259	-0.199945
sphingomyelin (d18:1/20:2, d18:2/20:1, d16:1/22:2)*	Lipid	Sphingolipid Metabolism	0	0	0	0	0	0	1.34086	1.64261	2.32628	2.90852	2.79391	2.45998	0	0	0	0	0	0	0	0	0	0	0	0	0	0
sphingomyelin (d18:1/22:1, d18:2/22:0, d16:1/24:1)*	Lipid	Sphingolipid Metabolism	0	-0.0708673	0.254128	0.0884547	0.0373233	-0.0710149	0.372097	0.0296326	-0.0390365	0.679266	0.637862	0.238606	0.0791709	-0.717051	-0.534753	-0.444574	-0.280228	-0.0608629	-0.0373046	-0.280741	-0.066445	0.01148	-0.195057	-0.134709	-0.105834	-0.102963
sphingomyelin (d18:1/22:2, d18:2/22:1, d16:1/24:2)*	Lipid	Sphingolipid Metabolism	0	-0.135438	-0.000338899	-0.106876	0.00844672	0.306153	0.730989	0.873653	1.02819	1.3374	1.36252	1.20403	1.08568	-0.263204	-0.208733	0.120538	0.0414183	0.289614	0.0405949	0.299698	0.234372	0.236243	0.15046	0.0787959	-0.172575	0.0453642
sphingomyelin (d18:1/24:1, d18:2/24:0)*	Lipid	Sphingolipid Metabolism	0	-0.361032	0.0466426	0.0799553	0.094	0.0606959	0.41313	0.289748	0.36902	1.60662	0.948367	0.618493	0.24037	-0.330073	-0.1433	0.0166444	0.120772	0.292592	0.110061	0.398618	0.391433	0.519058	0.20845	-0.0435811	-0.240601	0.156306
sphingomyelin (d18:2/14:0, d18:1/14:1)*	Lipid	Sphingolipid Metabolism	0	0	0.773229	1.59843	1.05353	1.36239	0.425423	0	0.912201	1.89404	1.25739	1.06387	0.68513	0	0	0	0	0	0	0	0	0	0	0	0	0.70796
sphingomyelin (d18:2/18:1)*	Lipid	Sphingolipid Metabolism	0	-0.169245	0.19028	0.144087	0.1082	0.104407	0.659331	0.589492	0.79023	1.6477	1.73751	1.32187	0.355529	-0.789321	-0.730929	-0.441286	-0.366854	-0.28719	-0.144294	-0.225774	-0.0859891	0.035255	-0.323441	-0.356943	-0.112884	0.17897
sphingomyelin (d18:2/23:1)*	Lipid	Sphingolipid Metabolism	0	0.137595	0.191426	0.0549083	0.014881	0.164237	0.605985	0.214785	0.522685	1.43732	1.2233	0.742334	0.255339	-0.142622	-0.24347	-0.164682	0.127015	0.0709974	0.104055	0.366151	0.376934	0.346194	0.321256	0.284195	0.201108	0.00100806
sphingomyelin (d18:2/24:1, d18:1/24:2)*	Lipid	Sphingolipid Metabolism	0	-0.293472	0.0358442	-0.151	-0.248882	-0.10895	0.381351	0.350385	0.666013	1.44208	1.27625	1.12498	0.608365	0.0327973	-0.0737845	0.056994	0.299653	0.358989	0.182262	0.346127	0.334844	0.289342	0.0946994	0.15435	-0.0374315	-0.0260161
sphingomyelin (d18:2/24:2)*	Lipid	Sphingolipid Metabolism	0	-0.145217	0.156892	-0.207365	-0.211591	0.11987	0.489207	0.634948	0.852457	1.10661	1.28996	1.23722	1.13493	0.374923	0.198731	0.229917	0.391316	0.456022	0.355058	0.570331	0.532172	0.524825	0.395629	0.39674	0.171569	0.2397
stearoyl sphingomyelin (d18:1/18:0)	Lipid	Sphingolipid Metabolism	0	-0.107138	0.0144172	-0.195546	-0.045238	0.26978	0.647104	0.747633	0.867506	1.79424	1.60736	0.833503	0.490364	-0.459908	-0.511374	-0.173705	-0.126155	0.357987	-0.176977	0.0195422	0.0724288	0.065012	-0.0589954	-0.18875	-0.381519	-0.177495
beta-sitosterol	Lipid	Sterol	0	-0.0502271	0.0779185	-0.250101	-0.138572	0.194424	-0.215899	-0.263747	-1.31629	-0.00750989	0.27315	-0.218326	-0.619384	-1.24616	-0.853583	-0.857359	-0.618064	-0.217469	-0.178176	-0.296701	-0.359118	-0.153382	-0.142498	0.0169681	-0.611858	-0.311254
campesterol	Lipid	Sterol	0	-0.213615	0.07332	-0.303734	0.0130539	0.194808	0.054741	-0.106782	-0.625548	0.679293	0.648056	0.0756697	-0.391235	-0.826972	-0.998763	-0.856683	-0.368858	-0.493938	-0.248461	-0.488027	-0.154039	-0.205176	-0.310469	-0.148818	-0.412977	-0.458489
cholesterol	Lipid	Sterol	0	-0.250908	0.0389207	-0.156625	-0.0288699	-0.0449059	0.318739	0.432535	0.429553	1.73798	1.76517	1.05449	0.468161	-0.0529141	-0.253923	-0.0309978	0.08161	0.0979767	-0.0148139	0.100478	-0.0270485	-0.0794092	-0.278269	0.0339854	-0.0654776	-0.0600355
allantoin	Nucleotide	Purine Metabolism, (Hypo)Xanthine/Inosine containing	0	-0.147632	-0.0152193	0.0522248	-0.0419458	0.0054244	0.256453	0.44505	0.751642	0.921118	0.797255	0.752333	0.954753	0.759689	0.565749	0.561284	0.746329	0.935398	0.731092	1.00175	0.598165	0.356107	0.0851661	-0.218806	0.0156365	0.221921
hypoxanthine	Nucleotide	Purine Metabolism, (Hypo)Xanthine/Inosine containing	0	-5.60421	1.05963	2.28156	-1.71003	-2.05286	-5.60421	-5.60421	-5.60421	-5.60421	-5.60421	-5.60421	-2.62092	-1.9926	4.66874	3.24713	1.69403	-2.05935	-5.60421	-1.60303	3.70778	4.09789	3.69397	5.60017	0.509804	-1.29947
inosine	Nucleotide	Purine Metabolism, (Hypo)Xanthine/Inosine containing	0	-1.2007	-0.432791	0.54313	-0.696636	-0.951703	-1.34365	-3.82658	-3.59134	-4.74872	-3.1355	-2.203	-1.60345	-0.574721	3.79939	2.68434	1.59364	-0.901059	-0.744595	-0.635168	1.88887	2.09004	2.75708	4.78297	-0.78258	-0.586282
xanthine	Nucleotide	Purine Metabolism, (Hypo)Xanthine/Inosine containing	0	-6.55077	0.327218	0.98775	-5.08304	-6.47536	-7.39736	-7.3476	-6.84654	-7.31138	-6.99184	-7.37226	-6.668	-2.16786	1.7471	1.27439	0.493255	-6.44234	-4.09325	-6.52289	1.12059	1.26205	1.42601	1.75584	-0.323543	-1.13617
N1-methyladenosine	Nucleotide	Purine Metabolism, Adenine containing	0	-0.25915	-0.00975716	0.158651	0.0809026	0.0326269	-0.00623057	-0.376966	-0.0838507	-0.558505	-0.45567	-0.0777811	0.443841	0.620444	0.548477	0.382186	0.452837	0.578465	0.643894	0.601972	0.434789	0.439498	0.0139607	-0.136324	0.00175249	0.0575029
N6-succinyladenosine	Nucleotide	Purine Metabolism, Adenine containing	0	-0.873354	1.72416	-0.873354	-0.873354	-0.873354	0.557939	1.55642	2.66582	3.40213	2.30344	1.4088	-0.125801	-0.873354	-0.873354	0.706832	1.16463	1.46132	0.745271	0.694708	-0.873354	-0.873354	-0.873354	-0.873354	-0.873354	0.890136
5-methylcytidine	Nucleotide	Pyrimidine Metabolism, Cytidine containing	0	-0.426944	-0.166216	0.0913598	-0.0802583	0.0563764	-0.0285461	-0.362364	-0.127367	-0.727797	-1.02619	-0.664255	-3.31483	-3.21862	-3.5168	-1.88492	-1.59655	-1.23776	-0.585539	-0.890971	-0.615864	-1.10507	-0.847247	-1.37415	-0.594367	-0.568615
cytidine	Nucleotide	Pyrimidine Metabolism, Cytidine containing	0	-0.00898878	0.172213	0.254327	-0.0851265	-0.103782	-0.0848889	0.432212	0.362657	-0.199574	0.0567774	-0.81956	-1.79098	-2.39193	-2.677	-1.48323	-1.07636	-0.813247	-0.401658	-0.36153	-0.759923	-0.927053	-0.78518	-1.52517	-0.622523	-0.428693
2'-deoxycytidine	Nucleotide	Pyrimidine Metabolism, Cytidine containing	0	-0.0598264	0.0282187	-0.108117	-0.185647	-0.00161087	0.789326	0.633665	1.30701	0.548276	0.482272	0.51779	-0.0992942	-0.0352014	-0.371013	-0.331377	0.148715	0.203432	0.421303	0.986006	0.385763	0.105224	-0.208347	-0.390929	-0.0507928	0.033262
2'-O-methylcytidine	Nucleotide	Pyrimidine Metabolism, Cytidine containing	0	-0.264063	-0.236822	-0.139062	-0.258648	-0.167299	-0.243446	0.553412	0.397996	0.169423	0.209584	0.693798	0.747396	0.428874	0.210661	0.383022	0.329727	0.63753	0.595672	0.707027	0.192236	-0.0805665	-0.149737	-0.384569	-0.304662	-0.248064
3-methylcytidine	Nucleotide	Pyrimidine Metabolism, Cytidine containing	0	0.243829	0.266156	0.508363	0.352006	0.0850693	0.384874	-1.97457	-0.0594283	-1.79126	-1.72713	0.0900842	0.227571	1.03413	0.963221	0.80278	0.536257	0.624032	1.01795	0.846242	0.337709	0.790281	-0.302083	0.214703	0.0055155	0.408857
5-methyl-2'-deoxycytidine	Nucleotide	Pyrimidine Metabolism, Cytidine containing	0	-0.547286	0.0172321	0.016886	-0.239036	-0.290149	0.156182	0.234027	1.03392	0.585721	0.472032	0.563381	0.889025	0.967415	0.253401	0.264376	0.95039	1.06078	0.858156	1.25296	0.367057	0.316911	-0.11628	-0.26048	0.0359698	0.0943784
cytosine	Nucleotide	Pyrimidine Metabolism, Cytidine containing	0	0.722256	0.544519	-0.0285905	0.474358	0.53644	0.588164	-0.00267314	-0.3891	-1.02696	-0.195012	0.361234	1.98078	2.5776	2.56398	2.07398	0.8751	1.23451	0.987932	1.47791	1.26105	1.01091	0.854717	0.57657	0.581219	1.2493
dihydroorotate	Nucleotide	Pyrimidine Metabolism, Orotate containing	0	-0.450603	-0.690775	0.188027	-0.876618	0.219294	0.73339	1.13982	2.5735	2.31494	1.74654	2.04006	2.33394	2.04027	2.36109	2.32707	1.59875	1.32064	0.695386	1.3294	1.23865	1.30887	0.473838	0.383592	0.390309	0.302594
orotate	Nucleotide	Pyrimidine Metabolism, Orotate containing	0	-0.301312	-0.292685	-0.0722429	-0.183885	0.219068	0.663653	0.884866	1.38309	2.14736	2.83466	3.76463	3.94735	3.18688	2.65553	2.22871	2.21855	2.18454	2.08024	2.50476	1.30164	0.572967	-0.142403	-0.0740261	-0.0180309	0.0676424
orotidine	Nucleotide	Pyrimidine Metabolism, Orotate containing	0	-0.0625073	0.248698	-0.129532	0.12051	0.46747	0.819094	1.21776	0.881532	1.31145	0.791293	1.49646	1.52648	1.35199	1.45027	1.52406	1.31032	1.43647	1.27347	1.49125	0.844938	0.833156	0.783102	0.648568	0.465797	0.617576
thymidine	Nucleotide	Pyrimidine Metabolism, Thymine containing	0	-0.270291	-0.277132	-0.343233	-0.768382	-0.637049	0.204474	-0.00896365	0.887288	0.0610902	-0.315168	0.0667892	0.503525	1.31623	0.149409	0.501212	0.523866	0.502369	0.714542	1.34084	0.562398	0.410451	-0.0906591	-0.66535	-0.618181	-0.125653
thymine	Nucleotide	Pyrimidine Metabolism, Thymine containing	0	0.253124	-0.339035	-0.339035	-0.339035	0.406772	1.33348	1.74566	3.12203	2.27683	2.23631	2.07124	2.22947	2.6866	1.43745	2.04165	1.55004	1.95346	2.3107	2.44988	1.09254	0.969635	1.02933	0.736298	0.560694	-0.339035
5-methyluridine (ribothymidine)	Nucleotide	Pyrimidine Metabolism, Uracil containing	0	-0.779061	-0.221839	-0.301878	-0.565509	-1.13248	-1.32415	-1.5526	-1.01407	-1.93608	-1.12455	-0.857899	0.0401188	0.153281	-0.470779	0.135149	-0.327174	0.0559947	0.17877	-0.183825	-0.529888	-0.99849	-0.466599	-0.705951	-1.32062	-0.693847
uridine	Nucleotide	Pyrimidine Metabolism, Uracil containing	0	0.152741	0.226364	0.408734	0.0557103	-0.258279	-0.791039	-0.686212	-1.26821	-1.4946	-1.28691	-1.05249	-0.518428	-0.893452	-0.46436	-0.781398	-0.887441	-0.463434	-0.00335823	0.02549	-0.411352	-0.478311	-0.10299	-0.813069	-0.237962	-0.295807
2'-deoxyuridine	Nucleotide	Pyrimidine Metabolism, Uracil containing	0	-0.0577931	-0.355878	-0.348113	-0.407138	0.173364	0.429555	0.352885	0.704164	0.332497	0.469506	0.845439	1.38337	1.76835	0.868737	1.119	0.990463	1.01729	0.99686	1.56628	0.918667	0.390352	0.445836	-0.0455768	-0.0145207	0.0793326
3-ureidopropionate	Nucleotide	Pyrimidine Metabolism, Uracil containing	0	-0.247408	-0.426257	-0.655682	-0.469994	0.462166	0.939014	2.04742	1.84766	1.73322	1.66571	1.76712	1.49544	1.424	0.934156	1.7355	1.67309	1.73498	1.80508	1.79862	0.672094	0.360992	0.346822	0.626533	0.0133979	-0.0197126
N-acetyl-beta-alanine	Nucleotide	Pyrimidine Metabolism, Uracil containing	0	-0.461311	-0.0170805	-0.259759	-0.503298	0.313001	-0.175572	0.55286	1.56426	1.61439	1.65307	1.01794	0.794697	1.17926	0.624871	1.06469	0.812587	1.00516	0.872871	1.07825	0.450033	0.141366	0.0560805	0.0479855	0.155979	0.0504376
uracil	Nucleotide	Pyrimidine Metabolism, Uracil containing	0	0.0540246	0.15356	0.445357	0.318948	0.868887	1.24988	2.40618	2.2732	2.03269	2.0659	1.92622	1.99792	1.84451	1.33028	1.71657	1.48176	1.65853	1.57872	1.75431	0.966197	1.06813	1.0625	1.05152	0.861856	0.892765
phenylacetylcarnitine	Peptide	Acetylated Peptides	0	-1.95966	-1.95966	0.1105	-1.95966	-1.95966	-1.95966	1.23739	2.24051	2.86681	1.94949	1.78188	1.04719	-0.0686874	0.326779	-1.95966	-0.963298	-1.95966	-1.95966	-0.174631	-0.381172	0.509726	-1.95966	-0.459821	-0.312768	-1.95966
gamma-glutamylalanine	Peptide	Gamma-glutamyl Amino Acid	0	0.161256	0.150317	-0.202544	-0.182429	-0.197705	0.358854	0.842956	-0.148013	0.0394755	-0.246133	1.0289	1.03918	0.686099	0.334123	0.442717	0.437394	0.365059	0.0100453	0.195294	0.152484	-0.925954	0.0875602	0.00120312	0.541433	0.0377177
gamma-glutamylglutamate	Peptide	Gamma-glutamyl Amino Acid	0	-0.0897948	0.113698	0.361088	0.472306	0.434124	0.625419	0.718352	-0.0437694	-0.111456	-0.557729	0.620415	0.782234	0.574861	0.817052	0.80387	0.792852	0.637385	0.581278	0.874526	0.5356	0.52377	0.335072	0.615802	0.581278	0.357842
gamma-glutamylglutamine	Peptide	Gamma-glutamyl Amino Acid	0	0.00457273	0.0414514	0.182225	0.367742	0.321012	0.560186	0.916104	0.38219	0.684045	0.433961	1.43796	1.48535	1.24154	1.04277	0.982933	0.709348	0.822443	0.940391	0.798824	0.454161	0.378832	0.343664	0.590642	0.447612	0.276159
gamma-glutamylglycine	Peptide	Gamma-glutamyl Amino Acid	0	-0.0456892	-0.0440613	-0.123273	-0.0182622	0.0785007	0.404346	0.692375	-0.0540609	0.19629	-0.0832282	0.927079	1.03373	0.836201	0.971715	0.857151	0.794732	0.906286	0.616182	0.864753	0.547124	0.322323	0.246037	0.316632	0.450257	0.443891
gamma-glutamylhistidine	Peptide	Gamma-glutamyl Amino Acid	0	-0.156828	-0.313931	-0.228155	-0.474991	-0.220659	0.15925	0.657772	0.474236	0.888837	0.759094	0.473487	0.679047	0.610741	0.342177	0.389408	0.332433	0.671772	0.286256	0.518245	0.0198045	-0.242033	0.143324	0.337382	0.0329146	-0.372214
gamma-glutamylisoleucine*	Peptide	Gamma-glutamyl Amino Acid	0	-0.672156	-0.173553	0.0618484	-0.109072	-0.158205	0.153728	0.14477	0.115151	-0.0191827	0.174659	0.384338	0.441584	-0.0764199	-0.252066	0.186013	0.36752	0.685909	0.469847	0.511002	0.117555	0.140344	0.140048	0.218851	0.259556	0.100339
gamma-glutamylleucine	Peptide	Gamma-glutamyl Amino Acid	0	-0.314807	-0.0552504	0.160987	0.109612	0.121135	0.381127	0.493368	0.330895	0.220315	-0.0349615	0.386369	0.303999	0.423307	0.394327	0.445702	0.411399	0.612905	0.511715	0.46528	0.0735046	0.0713905	0.361962	0.312148	0.190656	-0.0704321
gamma-glutamylmethionine	Peptide	Gamma-glutamyl Amino Acid	0	-0.297849	-0.00933093	-0.371682	-0.010252	-0.220488	0.257637	0.693974	-0.340458	0.0104824	-0.154004	0.081369	0.76523	0.498027	0.44693	0.487516	0.257892	0.14301	0.10722	0.453292	0.0781951	-0.110226	-0.0250696	0.192283	0.0977048	0.16901
gamma-glutamylphenylalanine	Peptide	Gamma-glutamyl Amino Acid	0	-0.0177087	-0.145175	-0.0133517	-0.318654	0.120373	0.621668	0.864722	1.34123	1.40203	0.950025	0.849852	0.525255	0.615703	0.360313	0.285223	0.229941	0.507805	0.376728	0.329344	0.033024	0.0649656	0.312089	0.228409	0.491673	-0.0582727
gamma-glutamyltyrosine	Peptide	Gamma-glutamyl Amino Acid	0	-0.360946	-0.397462	-0.217451	-0.552019	-0.883239	-0.629913	0.357109	-0.086475	0.599616	0.556559	0.512592	0.626953	0.824041	0.510311	0.464782	0.331619	0.490779	0.32373	0.309968	-0.0500668	-0.131252	-0.316839	-0.0967097	0.11376	-0.0500668
3-(3-hydroxyphenyl)propionate sulfate	Xenobiotics	Benzoate Metabolism	0	0.130426	0.435466	-1.93236	-1.10828	-0.21405	-0.878151	-2.40681	-8.49023	-8.9999	-5.71262	-4.99533	-1.83083	-0.27014	-0.444535	-2.06837	-2.1978	-1.02564	0.282399	-1.12256	-2.7855	-3.03158	-3.49884	-0.996756	-3.55612	-2.85533
4-ethylphenylsulfate	Xenobiotics	Benzoate Metabolism	0	-1.03616	-0.915107	0.447422	-0.0789285	-0.709614	-1.02481	-0.47581	-3.34126	-4.96783	-0.61592	-0.619939	-0.0817809	-0.93045	-0.604294	-1.07458	-1.55427	-1.50389	-1.03096	-2.04694	-1.60574	-0.234997	-0.556015	-1.33644	-0.898149	-2.44848
4-vinylphenol sulfate	Xenobiotics	Benzoate Metabolism	0	-0.361874	-0.344554	-0.611732	-0.394333	-0.842631	-0.561369	-0.8337	-3.3839	-6.63555	-2.24606	-0.820618	0.517935	0.909252	0.139772	-0.303463	0.180432	-0.0549099	0.143115	0.317401	-0.331175	-0.39762	0.475709	0.204062	-0.138324	-0.719822
catechol sulfate	Xenobiotics	Benzoate Metabolism	0	0.515332	0.435725	-0.166171	0.0609888	-0.27928	0.351581	-0.313931	-4.81051	-5.69844	-2.11471	-1.60008	0.183703	0.606286	0.0631836	0.0833291	-0.314109	0.174976	0.651387	0.149638	-0.126234	-0.155923	-0.334911	0.0252687	-0.133285	-0.861637
hippurate	Xenobiotics	Benzoate Metabolism	0	-0.901189	-1.03326	0.0919033	0.69677	-0.877688	-0.0441676	-0.101349	-3.47244	-3.88747	-2.03035	-1.01222	0.155003	-0.298843	-0.614653	0.387526	0.62966	0.612912	-1.66714	-0.392601	-0.728446	0.0260438	-0.00311037	-0.127415	-0.148928	0.27091
p-cresol sulfate	Xenobiotics	Benzoate Metabolism	0	-0.840258	-1.33437	0.478175	-0.577817	-1.25648	-0.57056	1.03377	3.23525	2.9174	2.57338	2.27998	0.18499	-0.556885	-0.189494	-0.727084	-2.20742	-0.494028	-1.88072	-1.65247	-1.37482	-1.06366	-1.10843	-2.07745	-0.127431	-1.23689
phenylpropionylglycine	Xenobiotics	Benzoate Metabolism	0	-0.540394	-0.367603	0.498326	0.680442	-0.435198	0.0835353	1.20933	-2.22466	-3.30583	-1.09703	0.80514	0.986093	0.790419	-0.19506	1.03279	1.9519	1.61823	-0.886385	1.03933	-0.38705	0.122917	0.0345747	0.269635	0.468818	0.579556
2-aminophenol sulfate	Xenobiotics	Chemical	0	0.318865	0.49089	0.0930111	0.244907	0.219592	0.313813	-0.0761768	-4.58654	-5.35241	-1.96372	-0.99472	0.34634	0.464919	0.314273	0.179882	-0.151828	0.110729	0.658043	0.380018	-0.331215	-0.0360457	-0.24279	-0.196838	-0.277027	-0.805176
6-hydroxyindole sulfate	Xenobiotics	Chemical	0	-0.466678	0.069709	0.404872	0.125039	-0.096997	-0.108205	-0.332993	-1.21878	-0.590467	-0.660815	0.34363	0.765712	0.78106	0.472755	-0.0644613	0.328287	-0.0178275	0.488993	0.0685307	-0.636911	-0.438857	-0.9222	-0.474672	-0.552706	-0.738202
dimethyl sulfone	Xenobiotics	Chemical	0	-0.421544	-0.416369	-0.682603	-0.660447	-1.4449	-0.540008	-0.633176	-3.06014	-2.65701	-2.31553	-0.367174	0.0660802	0.712864	0.239826	-0.104712	-0.203625	-0.0187492	-1.03167	-0.143601	0.352779	-0.462625	-0.305331	-0.254231	0.131255	0.213153
perfluorooctanesulfonic acid (PFOS)	Xenobiotics	Chemical	0	-0.0804015	0.0815817	0.0961609	-0.0281378	-0.156004	-0.477963	-0.0711648	0.0253932	0.414363	0.350145	0.199483	0.046218	-0.888053	-0.360645	-0.636781	-0.674302	-0.610296	-0.720209	-0.669468	-0.712088	-0.681852	-0.776452	-0.980581	-0.504177	-1.15801
N-methylpipecolate	Xenobiotics	Chemical	0	-0.0548972	-0.0694648	-0.217803	-0.354872	-0.159015	-0.126948	0.1909	1.15477	1.94906	1.01332	0.58939	0.637847	0.242281	-0.00960444	0.5089	0.688358	0.824589	0.310853	1.12696	0.281787	0.169564	0.122946	-0.144416	-0.119173	0.143068
sulfate*	Xenobiotics	Chemical	0	0.0260193	-0.0569875	0.11527	0.148599	-0.0578632	0.168204	0.341984	0.626654	1.0047	0.292686	0.787503	0.272066	0.272902	0.290623	0.250017	0.177907	0.202833	0.650224	0.635349	0.411963	0.272902	0.175375	0.0905089	0.117289	-0.14116
hydroquinone sulfate	Xenobiotics	Drug	0	-0.219901	-0.0296969	-0.950704	0.0138399	-0.831926	0.0528549	-0.285801	-2.58328	-2.58328	-2.49927	-1.55855	0.0819119	0.14301	-0.232471	-0.555761	-0.966058	-0.471545	-0.0492947	-0.135314	-0.79143	-0.563837	-1.21574	-0.456143	-0.423985	-0.71266
salicylate	Xenobiotics	Drug	0	0.588059	0.264274	0.0783865	-0.181021	-0.197826	0.0620324	-0.863967	-3.5548	-3.5548	-1.95923	-1.44945	0.292236	0.60189	0.210014	0.0439648	-0.234558	-0.00976253	0.452848	-0.0702176	-0.369639	-0.512551	0.0194702	0.310465	-0.270523	-0.868662
2,8-quinolinediol sulfate	Xenobiotics	Food Component/Plant	0	-0.440154	-0.457118	0.0816085	0.329997	-0.446692	0.0105153	0.205864	-5.13964	-4.93209	-0.994032	-0.8865	0.437638	0.0963817	-0.319204	0.216803	0.230661	-1.10291	-0.13101	-0.139898	-0.504906	-0.266909	-0.489349	-0.181448	-0.448131	-0.188513
3-hydroxycinnamate sulfate	Xenobiotics	Food Component/Plant	0	-0.518231	1.07301	-2.74181	-0.987602	-0.633353	-1.32165	-3.3337	-5.18931	-5.18931	-5.18931	-5.18931	-2.51415	-0.583991	-0.203786	-2.02877	-3.14082	-1.63044	-0.184262	-1.22948	-2.25912	-2.31847	-3.55354	-2.29622	-4.07537	-5.18931
4-allylphenol sulfate	Xenobiotics	Food Component/Plant	0	0.422628	-0.466795	0.557197	-0.380116	-0.391519	-0.446463	-0.511952	-3.66476	-1.59259	-1.64463	-0.885999	0.182666	-0.468338	-1.20615	-0.79269	-0.329253	-0.593818	-0.186728	-0.775044	-0.731429	-0.520078	-0.223814	-1.43585	-0.564258	-0.69516
4-hydroxycinnamate	Xenobiotics	Food Component/Plant	0	0.276639	-0.365798	-0.44451	-0.439425	-0.784528	0.669722	-0.519062	-0.479999	-1.10087	-0.827252	0.205291	0.564823	0.965181	-0.000110092	-0.411922	-0.180103	-1.01138	-0.438082	-1.27269	-1.09828	-1.28685	-0.585073	-0.599512	-0.0558923	-0.727274
carotene diol (1)	Xenobiotics	Food Component/Plant	0	-0.257833	-0.180138	-0.249937	-0.827496	-0.760312	-0.820194	-0.789661	-1.41989	-2.55978	-2.5169	-0.952379	-0.0677864	-0.401567	-0.49593	-0.522816	-0.249163	0.155743	-0.248389	0.225645	-0.00718247	-0.0754296	-0.122278	-0.732991	-0.0358302	-1.06075
cinnamoylglycine	Xenobiotics	Food Component/Plant	0	-1.14351	-0.651473	0.851442	1.20565	-0.138997	0.221373	-0.0960012	-3.67153	-4.68337	-2.54355	-1.31402	-0.174341	-0.182564	-0.909618	0.434622	0.636864	0.585931	-1.6548	-0.0940257	-0.839855	-0.0427725	-0.067756	-0.0888177	0.322245	0.164984
daidzein	Xenobiotics	Food Component/Plant	0	0.437169	0.231307	-0.504595	-0.322334	-1.03836	-0.210262	-0.650721	-3.10721	-3.10721	-2.64896	-1.67266	0.653802	1.3956	0.291856	0.0290664	-0.167678	-0.126042	0.771702	0.0707046	-0.556019	-0.937527	-0.327499	-0.25429	-0.138228	-1.21359
daidzein sulfate (1)	Xenobiotics	Food Component/Plant	0	0.39632	0.7053	-0.149757	-0.272698	-0.957691	0.543526	-0.177973	-3.02408	-3.02408	-3.02408	-1.93008	0.00793871	0.811729	-0.00732666	0.0681815	-1.03956	-0.541387	0.521148	-0.139658	-1.10262	-1.01641	-0.730455	-0.584963	0.328412	-1.39521
daidzein sulfate (2)	Xenobiotics	Food Component/Plant	0	0.0653941	-0.248085	-0.385698	-0.768201	-1.11653	0.210094	-0.192765	-2.87621	-5.00927	-2.34403	-1.98545	-0.945571	0.460577	0.217341	-0.670394	-1.22119	-1.06621	-0.294333	-0.992958	-2.18501	-1.33977	-1.03936	-0.898437	-0.310606	-2.30239
ferulic acid 4-sulfate	Xenobiotics	Food Component/Plant	0	-0.0701161	0.268332	-0.607354	0.0704912	0.262995	-0.0743633	0.0788403	-3.52469	-4.16045	-3.96224	-1.01553	0.660424	0.712762	0.831159	-0.4504	0.0966177	-0.383463	-0.132699	-0.314462	-0.901273	-0.924313	-0.208793	-0.172318	0.0560487	-0.401869
genistein	Xenobiotics	Food Component/Plant	0	0.155115	-0.378874	-0.0672004	-0.1514	-0.722647	-0.448776	-0.471893	-2.4184	-2.4184	-2.4184	-1.7984	1.22811	1.36034	0.77611	-0.238989	-0.158596	-0.287856	0.469478	-0.622941	-2.4184	-1.89652	-0.561947	-0.481065	-0.200755	-1.94497
methyl indole-3-acetate	Xenobiotics	Food Component/Plant	0	0.274588	0.327457	0.955483	0.328112	0.137162	0.382875	-0.555455	-0.519006	-2.30814	-2.17392	-1.95289	-2.07269	-1.15524	-0.841439	-1.24475	-1.16022	-1.24169	-0.296999	-1.23366	-0.784532	-0.366717	0.0750096	0.0781261	0.109796	0.065171
stachydrine	Xenobiotics	Food Component/Plant	0	0.238737	0.10575	0.00960569	-0.133506	-0.375742	-0.218592	-0.279737	-0.868846	-2.76642	-1.08993	-0.209648	0.444064	0.352037	0.177123	0.0168049	0.345984	0.444391	0.404285	0.578424	-0.0841028	-0.159933	0.191217	0.0535579	0.122872	-0.0510074
equol glucuronide	Xenobiotics	Food Component/Plant	0	0.0933256	0.912902	-0.00158609	0.456271	-0.00346282	0.275804	-0.797445	-4.12691	-4.26416	-1.18208	-0.907485	1.54339	0.778808	0.621438	0.232793	0.256993	0.349251	0.84296	0.555505	0.0548587	-0.554589	-0.842732	-0.83783	-1.32279	-1.02398
indoleacrylate	Xenobiotics	Food Component/Plant	0	1.3504	1.54607	1.75751	1.07722	1.06194	0.753412	0.0991306	-2.49913	-2.49913	-1.79693	0.324491	1.8306	2.54659	1.79952	1.72224	1.4291	1.35912	2.02609	1.48528	1.22389	1.07081	1.86835	0.938629	0.578648	0.795638
methyl glucopyranoside (alpha + beta)	Xenobiotics	Food Component/Plant	0	0.0258213	0.189846	0.0383045	-0.414336	0.0332984	-0.0108305	-0.491043	-0.725693	-0.310819	-0.862066	-0.621205	-0.255423	-0.330043	-0.391372	-0.376434	-0.429674	-0.389819	0.402184	-0.303655	-0.272169	0.02892	0.212395	1.22658	1.5453	1.62446
N-glycolylneuraminate	Xenobiotics	Food Component/Plant	0	0.536634	0.710671	0.644603	0.937153	1.47684	2.23092	3.63047	3.91504	4.40237	3.56701	3.91232	3.02148	1.83398	1.81534	2.2028	1.68597	2.05333	1.60607	1.89943	1.43937	1.39347	0.967056	-0.212631	0.570771	1.43213
retinal	Xenobiotics	Food Component/Plant	0	-0.560732	0.245785	-0.560732	0.806219	-0.560732	-0.560732	0.0751692	1.02296	1.81495	1.56566	1.53202	0.696802	-0.560732	-0.560732	0.444947	0.112633	-0.560732	-0.560732	-0.560732	0.815815	0.620986	-0.560732	0.500381	0.592736	0.728053
caffeic acid sulfate	Xenobiotics	Xanthine Metabolism	0	0.00403116	-0.576091	-0.253834	-0.580748	-0.812456	0.108566	-0.469478	-2.92815	-3.61547	-3.81536	-0.701323	0.293446	0.253061	-0.0279766	-0.635566	-0.974808	-0.165574	-1.11125	-1.08104	-0.980408	-1.30755	-0.512805	-1.09254	-0.209029	-1.13121

## Sheet: 1E
mouse	dpi	infected	metabolite	log2(fold change)
0_1	0	UI	3-hydroxybutyrate (BHBA)	1.1049
0_2	0	UI	3-hydroxybutyrate (BHBA)	0.8084
0_3	0	UI	3-hydroxybutyrate (BHBA)	0.8606
0_4	0	UI	3-hydroxybutyrate (BHBA)	1.1407
0_5	0	UI	3-hydroxybutyrate (BHBA)	0.8639
1_1	1	I	3-hydroxybutyrate (BHBA)	0.7253
1_2	1	I	3-hydroxybutyrate (BHBA)	0.7116
1_3	1	I	3-hydroxybutyrate (BHBA)	0.966
1_4	1	I	3-hydroxybutyrate (BHBA)	0.8676
1_5	1	I	3-hydroxybutyrate (BHBA)	0.4297
2_1	2	I	3-hydroxybutyrate (BHBA)	0.678
2_2	2	I	3-hydroxybutyrate (BHBA)	0.9919
2_3	2	I	3-hydroxybutyrate (BHBA)	1.203
2_4	2	I	3-hydroxybutyrate (BHBA)	1.2991
2_5	2	I	3-hydroxybutyrate (BHBA)	1.1888
3_1	3	I	3-hydroxybutyrate (BHBA)	0.546
3_2	3	I	3-hydroxybutyrate (BHBA)	1.4217
3_3	3	I	3-hydroxybutyrate (BHBA)	1.1913
3_4	3	I	3-hydroxybutyrate (BHBA)	1
3_5	3	I	3-hydroxybutyrate (BHBA)	0.8117
4_1	4	I	3-hydroxybutyrate (BHBA)	1.8568
4_2	4	I	3-hydroxybutyrate (BHBA)	0.9149
4_3	4	I	3-hydroxybutyrate (BHBA)	1.5231
4_4	4	I	3-hydroxybutyrate (BHBA)	1.3263
4_5	4	I	3-hydroxybutyrate (BHBA)	0.8416
5_1	5	I	3-hydroxybutyrate (BHBA)	0.4324
5_2	5	I	3-hydroxybutyrate (BHBA)	0.8125
5_3	5	I	3-hydroxybutyrate (BHBA)	1.3468
5_4	5	I	3-hydroxybutyrate (BHBA)	1.0129
5_5	5	I	3-hydroxybutyrate (BHBA)	1.43
5_6	5	UI	3-hydroxybutyrate (BHBA)	1.452
5_7	5	UI	3-hydroxybutyrate (BHBA)	0.6739
6_1	6	I	3-hydroxybutyrate (BHBA)	0.7193
6_2	6	I	3-hydroxybutyrate (BHBA)	1.0063
6_3	6	I	3-hydroxybutyrate (BHBA)	0.5964
6_4	6	I	3-hydroxybutyrate (BHBA)	0.8679
6_5	6	I	3-hydroxybutyrate (BHBA)	2.1124
7_1	7	I	3-hydroxybutyrate (BHBA)	1.1059
7_2	7	I	3-hydroxybutyrate (BHBA)	0.7603
7_3	7	I	3-hydroxybutyrate (BHBA)	1.0457
7_4	7	I	3-hydroxybutyrate (BHBA)	0.8847
7_5	7	I	3-hydroxybutyrate (BHBA)	0.7019
8_1	8	I	3-hydroxybutyrate (BHBA)	0.9905
8_2	8	I	3-hydroxybutyrate (BHBA)	1.829
8_3	8	I	3-hydroxybutyrate (BHBA)	2.8598
8_4	8	I	3-hydroxybutyrate (BHBA)	1.1587
8_5	8	I	3-hydroxybutyrate (BHBA)	2.9398
8_6	8	UI	3-hydroxybutyrate (BHBA)	1.5116
8_7	8	UI	3-hydroxybutyrate (BHBA)	0.8845
9_1	9	I	3-hydroxybutyrate (BHBA)	4.173
9_2	9	I	3-hydroxybutyrate (BHBA)	4.2073
9_3	9	I	3-hydroxybutyrate (BHBA)	5.9275
9_4	9	I	3-hydroxybutyrate (BHBA)	4.2206
9_5	9	I	3-hydroxybutyrate (BHBA)	1.1288
10_1	10	I	3-hydroxybutyrate (BHBA)	8.7343
10_2	10	I	3-hydroxybutyrate (BHBA)	3.4146
10_3	10	I	3-hydroxybutyrate (BHBA)	2.2094
10_4	10	I	3-hydroxybutyrate (BHBA)	1.8058
10_5	10	I	3-hydroxybutyrate (BHBA)	3.3017
10_6	10	UI	3-hydroxybutyrate (BHBA)	1.2253
10_7	10	UI	3-hydroxybutyrate (BHBA)	1.9689
11_1	11	I	3-hydroxybutyrate (BHBA)	0.747
11_2	11	I	3-hydroxybutyrate (BHBA)	1.7198
11_3	11	I	3-hydroxybutyrate (BHBA)	2.8269
11_4	11	I	3-hydroxybutyrate (BHBA)	2.4922
11_5	11	I	3-hydroxybutyrate (BHBA)	0.8618
12_1	12	I	3-hydroxybutyrate (BHBA)	0.7939
12_2	12	I	3-hydroxybutyrate (BHBA)	0.7508
12_3	12	I	3-hydroxybutyrate (BHBA)	0.6717
12_4	12	I	3-hydroxybutyrate (BHBA)	0.8908
12_5	12	I	3-hydroxybutyrate (BHBA)	0.7644
12_6	12	UI	3-hydroxybutyrate (BHBA)	1.4857
12_7	12	UI	3-hydroxybutyrate (BHBA)	1.0993
13_1	13	I	3-hydroxybutyrate (BHBA)	0.4431
13_2	13	I	3-hydroxybutyrate (BHBA)	0.7092
13_3	13	I	3-hydroxybutyrate (BHBA)	0.5067
13_4	13	I	3-hydroxybutyrate (BHBA)	0.9797
13_5	13	I	3-hydroxybutyrate (BHBA)	0.7699
14_1	14	I	3-hydroxybutyrate (BHBA)	0.8418
14_2	14	I	3-hydroxybutyrate (BHBA)	0.5227
14_3	14	I	3-hydroxybutyrate (BHBA)	0.4203
14_4	14	I	3-hydroxybutyrate (BHBA)	0.7205
14_5	14	I	3-hydroxybutyrate (BHBA)	1.0408
15_1	15	I	3-hydroxybutyrate (BHBA)	1.5315
15_2	15	I	3-hydroxybutyrate (BHBA)	0.7884
15_3	15	I	3-hydroxybutyrate (BHBA)	0.7192
15_4	15	I	3-hydroxybutyrate (BHBA)	1.538
15_5	15	I	3-hydroxybutyrate (BHBA)	0.807
15_6	15	UI	3-hydroxybutyrate (BHBA)	0.6465
15_7	15	UI	3-hydroxybutyrate (BHBA)	1.3096
16_1	16	I	3-hydroxybutyrate (BHBA)	1.8749
16_2	16	I	3-hydroxybutyrate (BHBA)	1.6518
16_3	16	I	3-hydroxybutyrate (BHBA)	1.1234
16_4	16	I	3-hydroxybutyrate (BHBA)	0.7638
16_5	16	I	3-hydroxybutyrate (BHBA)	0.7829
17_1	17	I	3-hydroxybutyrate (BHBA)	1.23
17_2	17	I	3-hydroxybutyrate (BHBA)	2.3546
17_3	17	I	3-hydroxybutyrate (BHBA)	1.1067
17_4	17	I	3-hydroxybutyrate (BHBA)	1.262
17_5	17	I	3-hydroxybutyrate (BHBA)	1.5172
18_1	18	I	3-hydroxybutyrate (BHBA)	1.7207
18_2	18	I	3-hydroxybutyrate (BHBA)	1.9797
18_3	18	I	3-hydroxybutyrate (BHBA)	1.3973
18_4	18	I	3-hydroxybutyrate (BHBA)	1.1104
18_5	18	I	3-hydroxybutyrate (BHBA)	1.0648
19_1	19	I	3-hydroxybutyrate (BHBA)	0.7103
19_2	19	I	3-hydroxybutyrate (BHBA)	1.6689
19_3	19	I	3-hydroxybutyrate (BHBA)	1.983
19_4	19	I	3-hydroxybutyrate (BHBA)	1.0228
19_5	19	I	3-hydroxybutyrate (BHBA)	1.3859
19_6	19	UI	3-hydroxybutyrate (BHBA)	0.8169
19_7	19	UI	3-hydroxybutyrate (BHBA)	0.7952
20_1	20	I	3-hydroxybutyrate (BHBA)	1.6003
20_2	20	I	3-hydroxybutyrate (BHBA)	1.0249
20_3	20	I	3-hydroxybutyrate (BHBA)	0.662
20_4	20	I	3-hydroxybutyrate (BHBA)	1.1477
20_5	20	I	3-hydroxybutyrate (BHBA)	1.1691
21_1	21	I	3-hydroxybutyrate (BHBA)	0.8275
21_2	21	I	3-hydroxybutyrate (BHBA)	0.7449
21_3	21	I	3-hydroxybutyrate (BHBA)	0.7865
21_4	21	I	3-hydroxybutyrate (BHBA)	0.6971
21_5	21	I	3-hydroxybutyrate (BHBA)	2.4092
22_1	22	I	3-hydroxybutyrate (BHBA)	0.8627
22_2	22	I	3-hydroxybutyrate (BHBA)	0.5509
22_3	22	I	3-hydroxybutyrate (BHBA)	0.6568
22_4	22	I	3-hydroxybutyrate (BHBA)	0.6247
22_5	22	I	3-hydroxybutyrate (BHBA)	0.803
23_1	23	I	3-hydroxybutyrate (BHBA)	0.863
23_2	23	I	3-hydroxybutyrate (BHBA)	1.0651
23_3	23	I	3-hydroxybutyrate (BHBA)	0.4203
23_4	23	I	3-hydroxybutyrate (BHBA)	0.7066
23_5	23	I	3-hydroxybutyrate (BHBA)	0.567
24_1	24	I	3-hydroxybutyrate (BHBA)	0.709
24_2	24	I	3-hydroxybutyrate (BHBA)	0.9691
24_3	24	I	3-hydroxybutyrate (BHBA)	0.5353
24_4	24	I	3-hydroxybutyrate (BHBA)	0.7696
24_5	24	I	3-hydroxybutyrate (BHBA)	1.0585
25_1	25	I	3-hydroxybutyrate (BHBA)	1.1844
25_2	25	I	3-hydroxybutyrate (BHBA)	1.1082
25_3	25	I	3-hydroxybutyrate (BHBA)	0.6038
25_4	25	I	3-hydroxybutyrate (BHBA)	0.5784
25_5	25	I	3-hydroxybutyrate (BHBA)	0.5585
25_6	25	UI	3-hydroxybutyrate (BHBA)	0.5139
25_7	25	UI	3-hydroxybutyrate (BHBA)	1.0878
0_1	0	UI	stachydrine	1.173
0_2	0	UI	stachydrine	0.9557
0_3	0	UI	stachydrine	0.911
0_4	0	UI	stachydrine	0.973
0_5	0	UI	stachydrine	1.2977
1_1	1	I	stachydrine	0.8295
1_2	1	I	stachydrine	1.1481
1_3	1	I	stachydrine	0.8437
1_4	1	I	stachydrine	1.223
1_5	1	I	stachydrine	1.1527
2_1	2	I	stachydrine	1.3981
2_2	2	I	stachydrine	1.1172
2_3	2	I	stachydrine	1.0268
2_4	2	I	stachydrine	0.8628
2_5	2	I	stachydrine	1.047
3_1	3	I	stachydrine	0.9795
3_2	3	I	stachydrine	0.9521
3_3	3	I	stachydrine	1.1004
3_4	3	I	stachydrine	0.9705
3_5	3	I	stachydrine	1.164
4_1	4	I	stachydrine	1.0568
4_2	4	I	stachydrine	0.887
4_3	4	I	stachydrine	0.786
4_4	4	I	stachydrine	0.6266
4_5	4	I	stachydrine	0.9533
5_1	5	I	stachydrine	0.7499
5_2	5	I	stachydrine	1.2428
5_3	5	I	stachydrine	1.0665
5_4	5	I	stachydrine	0.6995
5_5	5	I	stachydrine	0.6699
5_6	5	UI	stachydrine	0.8361
5_7	5	UI	stachydrine	1.0394
6_1	6	I	stachydrine	1.1315
6_2	6	I	stachydrine	0.8362
6_3	6	I	stachydrine	1.1602
6_4	6	I	stachydrine	0.8192
6_5	6	I	stachydrine	0.6125
7_1	7	I	stachydrine	1.0056
7_2	7	I	stachydrine	0.9242
7_3	7	I	stachydrine	0.7207
7_4	7	I	stachydrine	0.8015
7_5	7	I	stachydrine	0.7631
8_1	8	I	stachydrine	0.6167
8_2	8	I	stachydrine	0.5607
8_3	8	I	stachydrine	0.2527
8_4	8	I	stachydrine	0.4104
8_5	8	I	stachydrine	0.5328
8_6	8	UI	stachydrine	0.7861
8_7	8	UI	stachydrine	0.9133
9_1	9	I	stachydrine	0.1198
9_2	9	I	stachydrine	0.143
9_3	9	I	stachydrine	0.0818
9_4	9	I	stachydrine	0.3399
9_5	9	I	stachydrine	0.6075
10_1	10	I	stachydrine	0.2462
10_2	10	I	stachydrine	0.4343
10_3	10	I	stachydrine	0.4571
10_4	10	I	stachydrine	0.6101
10_5	10	I	stachydrine	0.5216
10_6	10	UI	stachydrine	0.8785
10_7	10	UI	stachydrine	0.6312
11_1	11	I	stachydrine	1.1067
11_2	11	I	stachydrine	0.8414
11_3	11	I	stachydrine	0.4516
11_4	11	I	stachydrine	0.4136
11_5	11	I	stachydrine	1.3505
12_1	12	I	stachydrine	1.2456
12_2	12	I	stachydrine	1.833
12_3	12	I	stachydrine	1.464
12_4	12	I	stachydrine	1.1055
12_5	12	I	stachydrine	1.3237
12_6	12	UI	stachydrine	1.1165
12_7	12	UI	stachydrine	1.1727
13_1	13	I	stachydrine	1.435
13_2	13	I	stachydrine	1.1608
13_3	13	I	stachydrine	1.1678
13_4	13	I	stachydrine	1.2419
13_5	13	I	stachydrine	1.4699
14_1	14	I	stachydrine	1.1001
14_2	14	I	stachydrine	1.2057
14_3	14	I	stachydrine	1.4058
14_4	14	I	stachydrine	0.9245
14_5	14	I	stachydrine	0.7404
15_1	15	I	stachydrine	0.7859
15_2	15	I	stachydrine	0.9844
15_3	15	I	stachydrine	0.9486
15_4	15	I	stachydrine	0.9911
15_5	15	I	stachydrine	1.0796
15_6	15	UI	stachydrine	1.0564
15_7	15	UI	stachydrine	1.0406
16_1	16	I	stachydrine	1.015
16_2	16	I	stachydrine	1.3492
16_3	16	I	stachydrine	1.2367
16_4	16	I	stachydrine	1.0697
16_5	16	I	stachydrine	1.3489
17_1	17	I	stachydrine	1.324
17_2	17	I	stachydrine	1.2359
17_3	17	I	stachydrine	1.7834
17_4	17	I	stachydrine	1.5798
17_5	17	I	stachydrine	1.2824
18_1	18	I	stachydrine	1.2989
18_2	18	I	stachydrine	1.0696
18_3	18	I	stachydrine	1.2484
18_4	18	I	stachydrine	1.2877
18_5	18	I	stachydrine	1.4368
19_1	19	I	stachydrine	1.4529
19_2	19	I	stachydrine	1.8253
19_3	19	I	stachydrine	1.3584
19_4	19	I	stachydrine	1.7588
19_5	19	I	stachydrine	1.0852
19_6	19	UI	stachydrine	0.9515
19_7	19	UI	stachydrine	1.2608
20_1	20	I	stachydrine	0.9334
20_2	20	I	stachydrine	0.7072
20_3	20	I	stachydrine	0.9607
20_4	20	I	stachydrine	0.9179
20_5	20	I	stachydrine	0.8453
21_1	21	I	stachydrine	0.7907
21_2	21	I	stachydrine	0.8709
21_3	21	I	stachydrine	1.0124
21_4	21	I	stachydrine	0.8566
21_5	21	I	stachydrine	0.9849
22_1	22	I	stachydrine	0.8856
22_2	22	I	stachydrine	0.9944
22_3	22	I	stachydrine	1.1109
22_4	22	I	stachydrine	1.524
22_5	22	I	stachydrine	1.1184
23_1	23	I	stachydrine	1.0098
23_2	23	I	stachydrine	1.0149
23_3	23	I	stachydrine	0.9497
23_4	23	I	stachydrine	1.013
23_5	23	I	stachydrine	0.66
24_1	24	I	stachydrine	1.0595
24_2	24	I	stachydrine	1.4433
24_3	24	I	stachydrine	1.0164
24_4	24	I	stachydrine	1.184
24_5	24	I	stachydrine	0.8503
25_1	25	I	stachydrine	0.771
25_2	25	I	stachydrine	0.9392
25_3	25	I	stachydrine	0.9437
25_4	25	I	stachydrine	1.4276
25_5	25	I	stachydrine	0.9089
25_6	25	UI	stachydrine	0.843
25_7	25	UI	stachydrine	1.0221

## Sheet: 1F
mouse	dpi	infected	metabolite	log2(fold change)
0_1	0	UI	alpha-tocopherol	2.6196
0_2	0	UI	alpha-tocopherol	0.3306
0_3	0	UI	alpha-tocopherol	2.4433
0_4	0	UI	alpha-tocopherol	0.4762
0_5	0	UI	alpha-tocopherol	2.483
1_1	1	I	alpha-tocopherol	0.8326
1_2	1	I	alpha-tocopherol	2.3286
1_3	1	I	alpha-tocopherol	0.1114
1_4	1	I	alpha-tocopherol	1.1989
1_5	1	I	alpha-tocopherol	0.2051
2_1	2	I	alpha-tocopherol	1.3936
2_2	2	I	alpha-tocopherol	0.4172
2_3	2	I	alpha-tocopherol	0.724
2_4	2	I	alpha-tocopherol	0.2405
2_5	2	I	alpha-tocopherol	0.4361
3_1	3	I	alpha-tocopherol	0.0861
3_2	3	I	alpha-tocopherol	1.37
3_3	3	I	alpha-tocopherol	2.4889
3_4	3	I	alpha-tocopherol	0.0636
3_5	3	I	alpha-tocopherol	0.2121
4_1	4	I	alpha-tocopherol	1.0033
4_2	4	I	alpha-tocopherol	0.5252
4_3	4	I	alpha-tocopherol	0.2057
4_4	4	I	alpha-tocopherol	0.0565
4_5	4	I	alpha-tocopherol	0.1907
5_1	5	I	alpha-tocopherol	0.1001
5_2	5	I	alpha-tocopherol	0.3753
5_3	5	I	alpha-tocopherol	0.8182
5_4	5	I	alpha-tocopherol	0.1679
5_5	5	I	alpha-tocopherol	0.0825
5_6	5	UI	alpha-tocopherol	0.0814
5_7	5	UI	alpha-tocopherol	0.1003
6_1	6	I	alpha-tocopherol	0.2115
6_2	6	I	alpha-tocopherol	0.3805
6_3	6	I	alpha-tocopherol	0.131
6_4	6	I	alpha-tocopherol	0.1359
6_5	6	I	alpha-tocopherol	0.293
7_1	7	I	alpha-tocopherol	1.0846
7_2	7	I	alpha-tocopherol	1.418
7_3	7	I	alpha-tocopherol	0.9804
7_4	7	I	alpha-tocopherol	2.5694
7_5	7	I	alpha-tocopherol	0.8817
8_1	8	I	alpha-tocopherol	2.4997
8_2	8	I	alpha-tocopherol	0.5119
8_3	8	I	alpha-tocopherol	1.9488
8_4	8	I	alpha-tocopherol	0.2364
8_5	8	I	alpha-tocopherol	0.2269
8_6	8	UI	alpha-tocopherol	0.1397
8_7	8	UI	alpha-tocopherol	0.3765
9_1	9	I	alpha-tocopherol	1.7857
9_2	9	I	alpha-tocopherol	2.7755
9_3	9	I	alpha-tocopherol	0.4775
9_4	9	I	alpha-tocopherol	0.7467
9_5	9	I	alpha-tocopherol	4.6182
10_1	10	I	alpha-tocopherol	2.6579
10_2	10	I	alpha-tocopherol	0.3169
10_3	10	I	alpha-tocopherol	4.2685
10_4	10	I	alpha-tocopherol	5.0176
10_5	10	I	alpha-tocopherol	1.0254
10_6	10	UI	alpha-tocopherol	0.3744
10_7	10	UI	alpha-tocopherol	0.1033
11_1	11	I	alpha-tocopherol	4.5884
11_2	11	I	alpha-tocopherol	3.5264
11_3	11	I	alpha-tocopherol	5.3003
11_4	11	I	alpha-tocopherol	1.4232
11_5	11	I	alpha-tocopherol	3.9403
12_1	12	I	alpha-tocopherol	4.9347
12_2	12	I	alpha-tocopherol	4.6044
12_3	12	I	alpha-tocopherol	5.4751
12_4	12	I	alpha-tocopherol	3.8269
12_5	12	I	alpha-tocopherol	3.8486
12_6	12	UI	alpha-tocopherol	0.0773
12_7	12	UI	alpha-tocopherol	2.57
13_1	13	I	alpha-tocopherol	3.3975
13_2	13	I	alpha-tocopherol	2.4263
13_3	13	I	alpha-tocopherol	3.1881
13_4	13	I	alpha-tocopherol	4.1716
13_5	13	I	alpha-tocopherol	3.6401
14_1	14	I	alpha-tocopherol	1.9636
14_2	14	I	alpha-tocopherol	3.3104
14_3	14	I	alpha-tocopherol	3.279
14_4	14	I	alpha-tocopherol	1.3159
14_5	14	I	alpha-tocopherol	2.4676
15_1	15	I	alpha-tocopherol	3.0012
15_2	15	I	alpha-tocopherol	2.3019
15_3	15	I	alpha-tocopherol	2.7081
15_4	15	I	alpha-tocopherol	3.3695
15_5	15	I	alpha-tocopherol	3.2502
15_6	15	UI	alpha-tocopherol	0.1285
15_7	15	UI	alpha-tocopherol	0.1495
16_1	16	I	alpha-tocopherol	2.4883
16_2	16	I	alpha-tocopherol	4.028
16_3	16	I	alpha-tocopherol	3.2293
16_4	16	I	alpha-tocopherol	2.636
16_5	16	I	alpha-tocopherol	4.7253
17_1	17	I	alpha-tocopherol	0.855
17_2	17	I	alpha-tocopherol	2.8449
17_3	17	I	alpha-tocopherol	3.6834
17_4	17	I	alpha-tocopherol	3.8673
17_5	17	I	alpha-tocopherol	3.6404
18_1	18	I	alpha-tocopherol	3.1254
18_2	18	I	alpha-tocopherol	3.3829
18_3	18	I	alpha-tocopherol	3.3999
18_4	18	I	alpha-tocopherol	2.5414
18_5	18	I	alpha-tocopherol	2.1545
19_1	19	I	alpha-tocopherol	2.4183
19_2	19	I	alpha-tocopherol	3.9623
19_3	19	I	alpha-tocopherol	4.7477
19_4	19	I	alpha-tocopherol	4.316
19_5	19	I	alpha-tocopherol	3.3925
19_6	19	UI	alpha-tocopherol	0.0748
19_7	19	UI	alpha-tocopherol	0.1562
20_1	20	I	alpha-tocopherol	2.3472
20_2	20	I	alpha-tocopherol	1.8717
20_3	20	I	alpha-tocopherol	0.7754
20_4	20	I	alpha-tocopherol	0.9967
20_5	20	I	alpha-tocopherol	2.6643
21_1	21	I	alpha-tocopherol	0.2636
21_2	21	I	alpha-tocopherol	0.1277
21_3	21	I	alpha-tocopherol	0.2579
21_4	21	I	alpha-tocopherol	2.9145
21_5	21	I	alpha-tocopherol	1.7871
22_1	22	I	alpha-tocopherol	0.1344
22_2	22	I	alpha-tocopherol	0.0677
22_3	22	I	alpha-tocopherol	0.2724
22_4	22	I	alpha-tocopherol	0.3593
22_5	22	I	alpha-tocopherol	0.0854
23_1	23	I	alpha-tocopherol	0.1847
23_2	23	I	alpha-tocopherol	0.4774
23_3	23	I	alpha-tocopherol	0.2819
23_4	23	I	alpha-tocopherol	0.0803
23_5	23	I	alpha-tocopherol	0.0891
24_1	24	I	alpha-tocopherol	1.9003
24_2	24	I	alpha-tocopherol	0.7427
24_3	24	I	alpha-tocopherol	0.1277
24_4	24	I	alpha-tocopherol	0.1482
24_5	24	I	alpha-tocopherol	0.8921
25_1	25	I	alpha-tocopherol	0.1466
25_2	25	I	alpha-tocopherol	0.0974
25_3	25	I	alpha-tocopherol	0.0865
25_4	25	I	alpha-tocopherol	0.5757
25_5	25	I	alpha-tocopherol	0.3583
25_6	25	UI	alpha-tocopherol	0.087
25_7	25	UI	alpha-tocopherol	0.4314

## Sheet: 1H
mouse	dpi	infected	metabolite	log2(fold change)
0_1	0	UI	bilirubin (E,E)*	0.0948
0_2	0	UI	bilirubin (E,E)*	0.165
0_3	0	UI	bilirubin (E,E)*	0.7217
0_4	0	UI	bilirubin (E,E)*	0.0948
0_5	0	UI	bilirubin (E,E)*	0.1939
1_1	1	I	bilirubin (E,E)*	0.3046
1_2	1	I	bilirubin (E,E)*	0.0948
1_3	1	I	bilirubin (E,E)*	0.0948
1_4	1	I	bilirubin (E,E)*	0.0948
1_5	1	I	bilirubin (E,E)*	0.2569
2_1	2	I	bilirubin (E,E)*	0.0948
2_2	2	I	bilirubin (E,E)*	0.0948
2_3	2	I	bilirubin (E,E)*	0.1857
2_4	2	I	bilirubin (E,E)*	0.0948
2_5	2	I	bilirubin (E,E)*	0.0948
3_1	3	I	bilirubin (E,E)*	0.0948
3_2	3	I	bilirubin (E,E)*	0.0948
3_3	3	I	bilirubin (E,E)*	0.1968
3_4	3	I	bilirubin (E,E)*	0.0948
3_5	3	I	bilirubin (E,E)*	0.0948
4_1	4	I	bilirubin (E,E)*	0.0948
4_2	4	I	bilirubin (E,E)*	0.0948
4_3	4	I	bilirubin (E,E)*	0.0948
4_4	4	I	bilirubin (E,E)*	0.0948
4_5	4	I	bilirubin (E,E)*	0.0948
5_1	5	I	bilirubin (E,E)*	0.1335
5_2	5	I	bilirubin (E,E)*	0.0948
5_3	5	I	bilirubin (E,E)*	0.0948
5_4	5	I	bilirubin (E,E)*	0.0948
5_5	5	I	bilirubin (E,E)*	0.0948
5_6	5	UI	bilirubin (E,E)*	0.0948
5_7	5	UI	bilirubin (E,E)*	0.0948
6_1	6	I	bilirubin (E,E)*	0.0948
6_2	6	I	bilirubin (E,E)*	0.1417
6_3	6	I	bilirubin (E,E)*	0.0948
6_4	6	I	bilirubin (E,E)*	0.0948
6_5	6	I	bilirubin (E,E)*	0.0948
7_1	7	I	bilirubin (E,E)*	0.4556
7_2	7	I	bilirubin (E,E)*	0.0948
7_3	7	I	bilirubin (E,E)*	0.2267
7_4	7	I	bilirubin (E,E)*	0.1885
7_5	7	I	bilirubin (E,E)*	0.0948
8_1	8	I	bilirubin (E,E)*	0.5773
8_2	8	I	bilirubin (E,E)*	1
8_3	8	I	bilirubin (E,E)*	2.3864
8_4	8	I	bilirubin (E,E)*	4.6019
8_5	8	I	bilirubin (E,E)*	1.6682
8_6	8	UI	bilirubin (E,E)*	0.0948
8_7	8	UI	bilirubin (E,E)*	0.0948
9_1	9	I	bilirubin (E,E)*	4.4376
9_2	9	I	bilirubin (E,E)*	3.3916
9_3	9	I	bilirubin (E,E)*	1.1918
9_4	9	I	bilirubin (E,E)*	4.5568
9_5	9	I	bilirubin (E,E)*	1.8147
10_1	10	I	bilirubin (E,E)*	2.0098
10_2	10	I	bilirubin (E,E)*	1.7905
10_3	10	I	bilirubin (E,E)*	3.3743
10_4	10	I	bilirubin (E,E)*	1.2997
10_5	10	I	bilirubin (E,E)*	1.4327
10_6	10	UI	bilirubin (E,E)*	0.0948
10_7	10	UI	bilirubin (E,E)*	0.0948
11_1	11	I	bilirubin (E,E)*	0.8983
11_2	11	I	bilirubin (E,E)*	2.7145
11_3	11	I	bilirubin (E,E)*	0.4324
11_4	11	I	bilirubin (E,E)*	0.5583
11_5	11	I	bilirubin (E,E)*	1.9078
12_1	12	I	bilirubin (E,E)*	1.9199
12_2	12	I	bilirubin (E,E)*	0.672
12_3	12	I	bilirubin (E,E)*	1.0483
12_4	12	I	bilirubin (E,E)*	0.9193
12_5	12	I	bilirubin (E,E)*	0.7733
12_6	12	UI	bilirubin (E,E)*	0.0948
12_7	12	UI	bilirubin (E,E)*	0.0948
13_1	13	I	bilirubin (E,E)*	1.1717
13_2	13	I	bilirubin (E,E)*	0.639
13_3	13	I	bilirubin (E,E)*	1.4325
13_4	13	I	bilirubin (E,E)*	0.5505
13_5	13	I	bilirubin (E,E)*	1.1559
14_1	14	I	bilirubin (E,E)*	0.4108
14_2	14	I	bilirubin (E,E)*	0.3688
14_3	14	I	bilirubin (E,E)*	1.7412
14_4	14	I	bilirubin (E,E)*	0.9747
14_5	14	I	bilirubin (E,E)*	2.024
15_1	15	I	bilirubin (E,E)*	0.78
15_2	15	I	bilirubin (E,E)*	0.9695
15_3	15	I	bilirubin (E,E)*	1.3115
15_4	15	I	bilirubin (E,E)*	1.3727
15_5	15	I	bilirubin (E,E)*	2.881
15_6	15	UI	bilirubin (E,E)*	0.0948
15_7	15	UI	bilirubin (E,E)*	0.0948
16_1	16	I	bilirubin (E,E)*	1.0708
16_2	16	I	bilirubin (E,E)*	1.7855
16_3	16	I	bilirubin (E,E)*	2.0583
16_4	16	I	bilirubin (E,E)*	1.2278
16_5	16	I	bilirubin (E,E)*	1.6219
17_1	17	I	bilirubin (E,E)*	0.4231
17_2	17	I	bilirubin (E,E)*	1.1583
17_3	17	I	bilirubin (E,E)*	1.5195
17_4	17	I	bilirubin (E,E)*	2.0832
17_5	17	I	bilirubin (E,E)*	1.8269
18_1	18	I	bilirubin (E,E)*	1.6732
18_2	18	I	bilirubin (E,E)*	0.3479
18_3	18	I	bilirubin (E,E)*	0.6681
18_4	18	I	bilirubin (E,E)*	1.952
18_5	18	I	bilirubin (E,E)*	2.3331
19_1	19	I	bilirubin (E,E)*	0.4929
19_2	19	I	bilirubin (E,E)*	2.2478
19_3	19	I	bilirubin (E,E)*	2.1089
19_4	19	I	bilirubin (E,E)*	2.1921
19_5	19	I	bilirubin (E,E)*	1.0075
19_6	19	UI	bilirubin (E,E)*	0.1496
19_7	19	UI	bilirubin (E,E)*	0.0948
20_1	20	I	bilirubin (E,E)*	0.2557
20_2	20	I	bilirubin (E,E)*	0.2289
20_3	20	I	bilirubin (E,E)*	0.3266
20_4	20	I	bilirubin (E,E)*	0.2435
20_5	20	I	bilirubin (E,E)*	0.221
21_1	21	I	bilirubin (E,E)*	0.0948
21_2	21	I	bilirubin (E,E)*	0.0948
21_3	21	I	bilirubin (E,E)*	0.1844
21_4	21	I	bilirubin (E,E)*	0.1249
21_5	21	I	bilirubin (E,E)*	0.1868
22_1	22	I	bilirubin (E,E)*	0.0948
22_2	22	I	bilirubin (E,E)*	0.0948
22_3	22	I	bilirubin (E,E)*	0.0948
22_4	22	I	bilirubin (E,E)*	0.0948
22_5	22	I	bilirubin (E,E)*	0.0948
23_1	23	I	bilirubin (E,E)*	0.0948
23_2	23	I	bilirubin (E,E)*	0.0948
23_3	23	I	bilirubin (E,E)*	0.0948
23_4	23	I	bilirubin (E,E)*	0.0948
23_5	23	I	bilirubin (E,E)*	0.0948
24_1	24	I	bilirubin (E,E)*	0.0948
24_2	24	I	bilirubin (E,E)*	0.0948
24_3	24	I	bilirubin (E,E)*	0.0948
24_4	24	I	bilirubin (E,E)*	0.0948
24_5	24	I	bilirubin (E,E)*	0.1281
25_1	25	I	bilirubin (E,E)*	0.0948
25_2	25	I	bilirubin (E,E)*	0.0948
25_3	25	I	bilirubin (E,E)*	0.0948
25_4	25	I	bilirubin (E,E)*	0.0948
25_5	25	I	bilirubin (E,E)*	0.0948
25_6	25	UI	bilirubin (E,E)*	0.0948
25_7	25	UI	bilirubin (E,E)*	0.0948
0_1	0	UI	bilirubin (Z,Z)	0.3635
0_2	0	UI	bilirubin (Z,Z)	0.2562
0_3	0	UI	bilirubin (Z,Z)	0.5575
0_4	0	UI	bilirubin (Z,Z)	0.0818
0_5	0	UI	bilirubin (Z,Z)	0.525
1_1	1	I	bilirubin (Z,Z)	0.3627
1_2	1	I	bilirubin (Z,Z)	0.3591
1_3	1	I	bilirubin (Z,Z)	0.1692
1_4	1	I	bilirubin (Z,Z)	0.2729
1_5	1	I	bilirubin (Z,Z)	0.0818
2_1	2	I	bilirubin (Z,Z)	0.3691
2_2	2	I	bilirubin (Z,Z)	0.0958
2_3	2	I	bilirubin (Z,Z)	0.7923
2_4	2	I	bilirubin (Z,Z)	0.2699
2_5	2	I	bilirubin (Z,Z)	0.2675
3_1	3	I	bilirubin (Z,Z)	0.0818
3_2	3	I	bilirubin (Z,Z)	0.3217
3_3	3	I	bilirubin (Z,Z)	0.4729
3_4	3	I	bilirubin (Z,Z)	0.0818
3_5	3	I	bilirubin (Z,Z)	0.0818
4_1	4	I	bilirubin (Z,Z)	0.4628
4_2	4	I	bilirubin (Z,Z)	0.1593
4_3	4	I	bilirubin (Z,Z)	0.1409
4_4	4	I	bilirubin (Z,Z)	0.0818
4_5	4	I	bilirubin (Z,Z)	0.2287
5_1	5	I	bilirubin (Z,Z)	0.0818
5_2	5	I	bilirubin (Z,Z)	0.1071
5_3	5	I	bilirubin (Z,Z)	0.0818
5_4	5	I	bilirubin (Z,Z)	0.0818
5_5	5	I	bilirubin (Z,Z)	0.0818
5_6	5	UI	bilirubin (Z,Z)	0.0818
5_7	5	UI	bilirubin (Z,Z)	0.0818
6_1	6	I	bilirubin (Z,Z)	0.3743
6_2	6	I	bilirubin (Z,Z)	0.2706
6_3	6	I	bilirubin (Z,Z)	0.0818
6_4	6	I	bilirubin (Z,Z)	0.0818
6_5	6	I	bilirubin (Z,Z)	0.0818
7_1	7	I	bilirubin (Z,Z)	0.3351
7_2	7	I	bilirubin (Z,Z)	0.3064
7_3	7	I	bilirubin (Z,Z)	0.0818
7_4	7	I	bilirubin (Z,Z)	0.9508
7_5	7	I	bilirubin (Z,Z)	0.2246
8_1	8	I	bilirubin (Z,Z)	0.7371
8_2	8	I	bilirubin (Z,Z)	1.7717
8_3	8	I	bilirubin (Z,Z)	4.2935
8_4	8	I	bilirubin (Z,Z)	7.1078
8_5	8	I	bilirubin (Z,Z)	1.5303
8_6	8	UI	bilirubin (Z,Z)	0.0818
8_7	8	UI	bilirubin (Z,Z)	0.0818
9_1	9	I	bilirubin (Z,Z)	8.3649
9_2	9	I	bilirubin (Z,Z)	5.1459
9_3	9	I	bilirubin (Z,Z)	0.9099
9_4	9	I	bilirubin (Z,Z)	8.3668
9_5	9	I	bilirubin (Z,Z)	2.5583
10_1	10	I	bilirubin (Z,Z)	2.4432
10_2	10	I	bilirubin (Z,Z)	0.519
10_3	10	I	bilirubin (Z,Z)	6.4501
10_4	10	I	bilirubin (Z,Z)	1.3762
10_5	10	I	bilirubin (Z,Z)	3.1127
10_6	10	UI	bilirubin (Z,Z)	0.1768
10_7	10	UI	bilirubin (Z,Z)	0.0818
11_1	11	I	bilirubin (Z,Z)	2.5585
11_2	11	I	bilirubin (Z,Z)	2.9702
11_3	11	I	bilirubin (Z,Z)	0.7725
11_4	11	I	bilirubin (Z,Z)	1.5936
11_5	11	I	bilirubin (Z,Z)	2.5354
12_1	12	I	bilirubin (Z,Z)	2.0428
12_2	12	I	bilirubin (Z,Z)	1.3573
12_3	12	I	bilirubin (Z,Z)	4.1031
12_4	12	I	bilirubin (Z,Z)	1.4623
12_5	12	I	bilirubin (Z,Z)	1.4914
12_6	12	UI	bilirubin (Z,Z)	0.0818
12_7	12	UI	bilirubin (Z,Z)	0.1936
13_1	13	I	bilirubin (Z,Z)	3.2979
13_2	13	I	bilirubin (Z,Z)	1.7224
13_3	13	I	bilirubin (Z,Z)	2.1446
13_4	13	I	bilirubin (Z,Z)	1.5808
13_5	13	I	bilirubin (Z,Z)	2.4066
14_1	14	I	bilirubin (Z,Z)	1.2905
14_2	14	I	bilirubin (Z,Z)	0.6149
14_3	14	I	bilirubin (Z,Z)	3.6021
14_4	14	I	bilirubin (Z,Z)	1.0339
14_5	14	I	bilirubin (Z,Z)	2.4334
15_1	15	I	bilirubin (Z,Z)	1.4476
15_2	15	I	bilirubin (Z,Z)	2.5133
15_3	15	I	bilirubin (Z,Z)	2.6283
15_4	15	I	bilirubin (Z,Z)	3.3855
15_5	15	I	bilirubin (Z,Z)	4.8621
15_6	15	UI	bilirubin (Z,Z)	0.0818
15_7	15	UI	bilirubin (Z,Z)	0.1228
16_1	16	I	bilirubin (Z,Z)	4.2882
16_2	16	I	bilirubin (Z,Z)	3.5741
16_3	16	I	bilirubin (Z,Z)	5.454
16_4	16	I	bilirubin (Z,Z)	1.9257
16_5	16	I	bilirubin (Z,Z)	3.2479
17_1	17	I	bilirubin (Z,Z)	1.1301
17_2	17	I	bilirubin (Z,Z)	4.3309
17_3	17	I	bilirubin (Z,Z)	2.8253
17_4	17	I	bilirubin (Z,Z)	3.5005
17_5	17	I	bilirubin (Z,Z)	3.2788
18_1	18	I	bilirubin (Z,Z)	4.4271
18_2	18	I	bilirubin (Z,Z)	0.9661
18_3	18	I	bilirubin (Z,Z)	1.6768
18_4	18	I	bilirubin (Z,Z)	1.9932
18_5	18	I	bilirubin (Z,Z)	4.0418
19_1	19	I	bilirubin (Z,Z)	0.7902
19_2	19	I	bilirubin (Z,Z)	5.2535
19_3	19	I	bilirubin (Z,Z)	4.1746
19_4	19	I	bilirubin (Z,Z)	5.5637
19_5	19	I	bilirubin (Z,Z)	4.7667
19_6	19	UI	bilirubin (Z,Z)	0.0818
19_7	19	UI	bilirubin (Z,Z)	0.0818
20_1	20	I	bilirubin (Z,Z)	0.7777
20_2	20	I	bilirubin (Z,Z)	0.6133
20_3	20	I	bilirubin (Z,Z)	0.3231
20_4	20	I	bilirubin (Z,Z)	0.65
20_5	20	I	bilirubin (Z,Z)	0.9225
21_1	21	I	bilirubin (Z,Z)	0.1343
21_2	21	I	bilirubin (Z,Z)	0.0818
21_3	21	I	bilirubin (Z,Z)	0.1672
21_4	21	I	bilirubin (Z,Z)	0.6089
21_5	21	I	bilirubin (Z,Z)	0.6033
22_1	22	I	bilirubin (Z,Z)	0.0818
22_2	22	I	bilirubin (Z,Z)	0.0818
22_3	22	I	bilirubin (Z,Z)	0.0818
22_4	22	I	bilirubin (Z,Z)	0.1102
22_5	22	I	bilirubin (Z,Z)	0.0818
23_1	23	I	bilirubin (Z,Z)	0.0818
23_2	23	I	bilirubin (Z,Z)	0.303
23_3	23	I	bilirubin (Z,Z)	0.0968
23_4	23	I	bilirubin (Z,Z)	0.0818
23_5	23	I	bilirubin (Z,Z)	0.0818
24_1	24	I	bilirubin (Z,Z)	0.3702
24_2	24	I	bilirubin (Z,Z)	0.1054
24_3	24	I	bilirubin (Z,Z)	0.0818
24_4	24	I	bilirubin (Z,Z)	0.0818
24_5	24	I	bilirubin (Z,Z)	0.0818
25_1	25	I	bilirubin (Z,Z)	0.0818
25_2	25	I	bilirubin (Z,Z)	0.0818
25_3	25	I	bilirubin (Z,Z)	0.0818
25_4	25	I	bilirubin (Z,Z)	0.188
25_5	25	I	bilirubin (Z,Z)	0.1344
25_6	25	UI	bilirubin (Z,Z)	0.0818
25_7	25	UI	bilirubin (Z,Z)	0.0818
0_1	0	UI	biliverdin	0.2621
0_2	0	UI	biliverdin	0.7534
0_3	0	UI	biliverdin	1.1638
0_4	0	UI	biliverdin	0.7155
0_5	0	UI	biliverdin	0.6727
1_1	1	I	biliverdin	0.887
1_2	1	I	biliverdin	0.3332
1_3	1	I	biliverdin	0.846
1_4	1	I	biliverdin	0.3897
1_5	1	I	biliverdin	0.6407
2_1	2	I	biliverdin	0.8114
2_2	2	I	biliverdin	0.5728
2_3	2	I	biliverdin	1.0483
2_4	2	I	biliverdin	0.8238
2_5	2	I	biliverdin	0.8995
3_1	3	I	biliverdin	0.9295
3_2	3	I	biliverdin	0.4635
3_3	3	I	biliverdin	0.8393
3_4	3	I	biliverdin	0.8947
3_5	3	I	biliverdin	0.8714
4_1	4	I	biliverdin	0.7709
4_2	4	I	biliverdin	0.5423
4_3	4	I	biliverdin	0.8138
4_4	4	I	biliverdin	0.6302
4_5	4	I	biliverdin	0.7536
5_1	5	I	biliverdin	1.4703
5_2	5	I	biliverdin	0.515
5_3	5	I	biliverdin	0.6256
5_4	5	I	biliverdin	0.7337
5_5	5	I	biliverdin	0.6241
5_6	5	UI	biliverdin	1.1941
5_7	5	UI	biliverdin	0.7347
6_1	6	I	biliverdin	0.8528
6_2	6	I	biliverdin	0.9948
6_3	6	I	biliverdin	0.7172
6_4	6	I	biliverdin	0.7919
6_5	6	I	biliverdin	0.725
7_1	7	I	biliverdin	1.0965
7_2	7	I	biliverdin	0.7794
7_3	7	I	biliverdin	1.2411
7_4	7	I	biliverdin	0.4228
7_5	7	I	biliverdin	1.0822
8_1	8	I	biliverdin	1.3164
8_2	8	I	biliverdin	3.1236
8_3	8	I	biliverdin	3.768
8_4	8	I	biliverdin	10.4127
8_5	8	I	biliverdin	6.2465
8_6	8	UI	biliverdin	0.6544
8_7	8	UI	biliverdin	0.4982
9_1	9	I	biliverdin	9.2028
9_2	9	I	biliverdin	6.0285
9_3	9	I	biliverdin	3.9641
9_4	9	I	biliverdin	11.4518
9_5	9	I	biliverdin	1.9634
10_1	10	I	biliverdin	3.8075
10_2	10	I	biliverdin	8.0265
10_3	10	I	biliverdin	3.6316
10_4	10	I	biliverdin	2.6824
10_5	10	I	biliverdin	3.4785
10_6	10	UI	biliverdin	0.4358
10_7	10	UI	biliverdin	0.7842
11_1	11	I	biliverdin	1.2881
11_2	11	I	biliverdin	4.0143
11_3	11	I	biliverdin	0.6271
11_4	11	I	biliverdin	1.5663
11_5	11	I	biliverdin	2.3274
12_1	12	I	biliverdin	2.2261
12_2	12	I	biliverdin	1.3109
12_3	12	I	biliverdin	1.1092
12_4	12	I	biliverdin	1.4801
12_5	12	I	biliverdin	2.2917
12_6	12	UI	biliverdin	1.084
12_7	12	UI	biliverdin	0.3111
13_1	13	I	biliverdin	1.7569
13_2	13	I	biliverdin	1.9454
13_3	13	I	biliverdin	2.6315
13_4	13	I	biliverdin	0.8372
13_5	13	I	biliverdin	1.9442
14_1	14	I	biliverdin	1.1546
14_2	14	I	biliverdin	1.2476
14_3	14	I	biliverdin	2.5871
14_4	14	I	biliverdin	2.4443
14_5	14	I	biliverdin	4.2572
15_1	15	I	biliverdin	2.4913
15_2	15	I	biliverdin	1.7265
15_3	15	I	biliverdin	1.9195
15_4	15	I	biliverdin	2.4753
15_5	15	I	biliverdin	4.6814
15_6	15	UI	biliverdin	0.4181
15_7	15	UI	biliverdin	1.0052
16_1	16	I	biliverdin	2.4946
16_2	16	I	biliverdin	3.4647
16_3	16	I	biliverdin	3.0587
16_4	16	I	biliverdin	2.1688
16_5	16	I	biliverdin	3.3763
17_1	17	I	biliverdin	1.7959
17_2	17	I	biliverdin	1.8217
17_3	17	I	biliverdin	2.9141
17_4	17	I	biliverdin	2.4042
17_5	17	I	biliverdin	3.2102
18_1	18	I	biliverdin	3.8679
18_2	18	I	biliverdin	1.051
18_3	18	I	biliverdin	1.436
18_4	18	I	biliverdin	4.0558
18_5	18	I	biliverdin	4.1475
19_1	19	I	biliverdin	1.2311
19_2	19	I	biliverdin	3.4115
19_3	19	I	biliverdin	3.2836
19_4	19	I	biliverdin	3.0034
19_5	19	I	biliverdin	1.4744
19_6	19	UI	biliverdin	2.3245
19_7	19	UI	biliverdin	0.5797
20_1	20	I	biliverdin	0.6497
20_2	20	I	biliverdin	0.869
20_3	20	I	biliverdin	1.3396
20_4	20	I	biliverdin	0.968
20_5	20	I	biliverdin	0.7103
21_1	21	I	biliverdin	0.3383
21_2	21	I	biliverdin	0.6435
21_3	21	I	biliverdin	0.9048
21_4	21	I	biliverdin	0.4498
21_5	21	I	biliverdin	0.7711
22_1	22	I	biliverdin	0.4566
22_2	22	I	biliverdin	1.3387
22_3	22	I	biliverdin	0.3189
22_4	22	I	biliverdin	0.2353
22_5	22	I	biliverdin	0.7729
23_1	23	I	biliverdin	0.3251
23_2	23	I	biliverdin	0.262
23_3	23	I	biliverdin	0.2401
23_4	23	I	biliverdin	0.5315
23_5	23	I	biliverdin	0.8532
24_1	24	I	biliverdin	0.1888
24_2	24	I	biliverdin	0.5091
24_3	24	I	biliverdin	0.369
24_4	24	I	biliverdin	0.4815
24_5	24	I	biliverdin	1.1622
25_1	25	I	biliverdin	0.4961
25_2	25	I	biliverdin	0.9162
25_3	25	I	biliverdin	0.8143
25_4	25	I	biliverdin	0.814
25_5	25	I	biliverdin	0.5468
25_6	25	UI	biliverdin	1.468
25_7	25	UI	biliverdin	0.7427
0_1	0	UI	heme	1.178
0_2	0	UI	heme	1.4242
0_3	0	UI	heme	0.5766
0_4	0	UI	heme	1.1873
0_5	0	UI	heme	1.1125
1_1	1	I	heme	1.0511
1_2	1	I	heme	0.8339
1_3	1	I	heme	1.0174
1_4	1	I	heme	1.8373
1_5	1	I	heme	1.0798
2_1	2	I	heme	0.982
2_2	2	I	heme	0.8892
2_3	2	I	heme	2.3836
2_4	2	I	heme	1.4864
2_5	2	I	heme	1.0693
3_1	3	I	heme	0.8604
3_2	3	I	heme	1.5263
3_3	3	I	heme	0.7122
3_4	3	I	heme	1.5849
3_5	3	I	heme	0.8665
4_1	4	I	heme	2.086
4_2	4	I	heme	1.8525
4_3	4	I	heme	0.8064
4_4	4	I	heme	0.9259
4_5	4	I	heme	2.1141
5_1	5	I	heme	2.2847
5_2	5	I	heme	0.7514
5_3	5	I	heme	0.3192
5_4	5	I	heme	2.6949
5_5	5	I	heme	0.9686
5_6	5	UI	heme	1.9664
5_7	5	UI	heme	2.2318
6_1	6	I	heme	2.0986
6_2	6	I	heme	2.1093
6_3	6	I	heme	1.1441
6_4	6	I	heme	1.0523
6_5	6	I	heme	1.7947
7_1	7	I	heme	1.332
7_2	7	I	heme	0.7569
7_3	7	I	heme	0.7746
7_4	7	I	heme	1.0749
7_5	7	I	heme	1.0652
8_1	8	I	heme	0.2558
8_2	8	I	heme	0.8199
8_3	8	I	heme	0.8789
8_4	8	I	heme	1.546
8_5	8	I	heme	1.0929
8_6	8	UI	heme	0.8984
8_7	8	UI	heme	1.6149
9_1	9	I	heme	1.564
9_2	9	I	heme	0.7508
9_3	9	I	heme	0.8431
9_4	9	I	heme	2.121
9_5	9	I	heme	0.1994
10_1	10	I	heme	0.3938
10_2	10	I	heme	0.8215
10_3	10	I	heme	1.0248
10_4	10	I	heme	0.0504
10_5	10	I	heme	1.0037
10_6	10	UI	heme	1.2156
10_7	10	UI	heme	3.0557
11_1	11	I	heme	0.6357
11_2	11	I	heme	0.5059
11_3	11	I	heme	0.0282
11_4	11	I	heme	1.7774
11_5	11	I	heme	0.5114
12_1	12	I	heme	0.1201
12_2	12	I	heme	0.1763
12_3	12	I	heme	0.2559
12_4	12	I	heme	0.2704
12_5	12	I	heme	0.4404
12_6	12	UI	heme	1.0288
12_7	12	UI	heme	0.969
13_1	13	I	heme	0.2976
13_2	13	I	heme	0.2939
13_3	13	I	heme	0.0536
13_4	13	I	heme	0.408
13_5	13	I	heme	0.2523
14_1	14	I	heme	0.5318
14_2	14	I	heme	0.2789
14_3	14	I	heme	0.5388
14_4	14	I	heme	1.1784
14_5	14	I	heme	0.3375
15_1	15	I	heme	0.4491
15_2	15	I	heme	0.6586
15_3	15	I	heme	0.929
15_4	15	I	heme	1.0286
15_5	15	I	heme	0.044
15_6	15	UI	heme	0.9711
15_7	15	UI	heme	1.5217
16_1	16	I	heme	0.1358
16_2	16	I	heme	0.0272
16_3	16	I	heme	0.6745
16_4	16	I	heme	0.7874
16_5	16	I	heme	0.3831
17_1	17	I	heme	1.0777
17_2	17	I	heme	0.7753
17_3	17	I	heme	0.658
17_4	17	I	heme	0.1971
17_5	17	I	heme	0.1866
18_1	18	I	heme	1.0119
18_2	18	I	heme	0.6459
18_3	18	I	heme	0.3839
18_4	18	I	heme	0.2999
18_5	18	I	heme	0.9963
19_1	19	I	heme	1.0448
19_2	19	I	heme	0.2339
19_3	19	I	heme	0.047
19_4	19	I	heme	0.778
19_5	19	I	heme	0.2545
19_6	19	UI	heme	1.3183
19_7	19	UI	heme	0.9866
20_1	20	I	heme	1.4599
20_2	20	I	heme	1.0918
20_3	20	I	heme	0.8977
20_4	20	I	heme	0.473
20_5	20	I	heme	1.9264
21_1	21	I	heme	1.5328
21_2	21	I	heme	1.132
21_3	21	I	heme	0.8656
21_4	21	I	heme	1.3076
21_5	21	I	heme	1.0803
22_1	22	I	heme	1.1469
22_2	22	I	heme	0.8038
22_3	22	I	heme	2.7626
22_4	22	I	heme	1.9981
22_5	22	I	heme	1.3889
23_1	23	I	heme	1.0914
23_2	23	I	heme	1.7785
23_3	23	I	heme	1.8068
23_4	23	I	heme	2.2146
23_5	23	I	heme	0.7717
24_1	24	I	heme	1.4866
24_2	24	I	heme	1.4614
24_3	24	I	heme	1.6298
24_4	24	I	heme	1.3808
24_5	24	I	heme	3.0008
25_1	25	I	heme	1.7427
25_2	25	I	heme	1.6135
25_3	25	I	heme	1.029
25_4	25	I	heme	1.9151
25_5	25	I	heme	1.2607
25_6	25	UI	heme	1.2705
25_7	25	UI	heme	0.6787

## Sheet: 1I
metabolite	super.pathway	SUB.PATHWAY	mouse log2(fold change)	human log2(fold change)
glutamine	Amino Acid	Glutamate Metabolism	0.575835	-0.534651
glycine	Amino Acid	Glycine, Serine and Threonine Metabolism	0.3127	-1.93072
N-acetylserine	Amino Acid	Glycine, Serine and Threonine Metabolism	1.02403	1.0974
serine	Amino Acid	Glycine, Serine and Threonine Metabolism	0.377856	-1.19071
2-hydroxy-3-methylvalerate	Amino Acid	Leucine, Isoleucine and Valine Metabolism	-0.269869	2.29924
3-methyl-2-oxobutyrate	Amino Acid	Leucine, Isoleucine and Valine Metabolism	0.556507	1.55561
4-methyl-2-oxopentanoate	Amino Acid	Leucine, Isoleucine and Valine Metabolism	0.608206	1.02667
2-hydroxy-3-methylvalerate	Amino Acid	Leucine, Isoleucine and Valine Metabolism	-0.269869	2.29924
3-hydroxyisobutyrate	Amino Acid	Leucine, Isoleucine and Valine Metabolism	0.673843	3.01935
alpha-hydroxyisocaproate	Amino Acid	Leucine, Isoleucine and Valine Metabolism	-0.141778	2.50119
N-acetylvaline	Amino Acid	Leucine, Isoleucine and Valine Metabolism	0.537356	1.37263
2-aminoadipate	Amino Acid	Lysine Metabolism	0.66642	1.31452
N-acetylmethionine	Amino Acid	Methionine, Cysteine, SAM and Taurine Metabolism	-0.731704	1.10567
phenylalanine	Amino Acid	Phenylalanine Metabolism	0.533432	1.26249
phenyllactate (PLA)	Amino Acid	Phenylalanine Metabolism	-0.393576	3.74901
5-methylthioadenosine (MTA)	Amino Acid	Polyamine Metabolism	0.466773	1.14775
indoleacetate	Amino Acid	Tryptophan Metabolism	-2.03547	-0.81348
indolelactate	Amino Acid	Tryptophan Metabolism	-0.289493	2.59571
indolepropionate	Amino Acid	Tryptophan Metabolism	-4.28819	-2.95557
kynurenate	Amino Acid	Tryptophan Metabolism	0.232953	2.91645
kynurenine	Amino Acid	Tryptophan Metabolism	2.44242	1.82903
arginine	Amino Acid	Urea cycle; Arginine and Proline Metabolism	-4.36569	-0.526389
ornithine	Amino Acid	Urea cycle; Arginine and Proline Metabolism	1.28537	-0.39162
urea	Amino Acid	Urea cycle; Arginine and Proline Metabolism	0.679647	1.28301
erythronate*	Carbohydrate	Aminosugar Metabolism	1.27879	0.589584
glucuronate	Carbohydrate	Aminosugar Metabolism	1.10657	1.90886
N-acetylneuraminate	Carbohydrate	Aminosugar Metabolism	1.14538	0.725167
pyruvate	Carbohydrate	Glycolysis, Gluconeogenesis, and Pyruvate Metabolism	1.51909	1.18699
bilirubin (E,E)*	Cofactors/Vitamins	Hemoglobin and Porphyrin Metabolism	4.36143	2.94203
trigonelline (N'-methylnicotinate)	Cofactors/Vitamins	Nicotinate and Nicotinamide Metabolism	-3.31141	-3.52698
riboflavin (Vitamin B2)	Cofactors/Vitamins	Riboflavin Metabolism	-0.637553	0.832377
citrate	Energy	TCA Cycle	0.814138	-0.697071
17-methylstearate	Lipid	Fatty Acid, Branched	0.510889	1.39993
2-hydroxyglutarate	Lipid	Fatty Acid, Dicarboxylate	-0.257601	0.547005
2-hydroxypalmitate	Lipid	Fatty Acid, Monohydroxy	1.00985	0.359957
2-hydroxystearate	Lipid	Fatty Acid, Monohydroxy	0.799593	0.156318
3-hydroxydecanoate	Lipid	Fatty Acid, Monohydroxy	1.87236	1.74275
glycerol	Lipid	Glycerolipid Metabolism	-0.766349	0.63554
10-heptadecenoate (17:1n7)	Lipid	Long Chain Fatty Acid	0.861932	2.56048
myristate (14:0)	Lipid	Long Chain Fatty Acid	0.530012	1.30727
myristoleate (14:1n5)	Lipid	Long Chain Fatty Acid	2.29275	3.25926
nonadecanoate (19:0)	Lipid	Long Chain Fatty Acid	-0.0170942	0.890411
palmitate (16:0)	Lipid	Long Chain Fatty Acid	0.777358	1.19572
palmitoleate (16:1n7)	Lipid	Long Chain Fatty Acid	1.35763	3.00985
10-heptadecenoate (17:1n7)	Lipid	Long Chain Fatty Acid	0.861932	2.56048
10-nonadecenoate (19:1n9)	Lipid	Long Chain Fatty Acid	0.536595	2.17603
palmitate (16:0)	Lipid	Long Chain Fatty Acid	0.777358	1.19572
dihomo-linolenate (20:3n3 or n6)	Lipid	Polyunsaturated Fatty Acid (n3 and n6)	0.442726	0.924815
docosahexaenoate (DHA; 22:6n3)	Lipid	Polyunsaturated Fatty Acid (n3 and n6)	0.71125	1.17808
docosapentaenoate (n6 DPA; 22:5n6)	Lipid	Polyunsaturated Fatty Acid (n3 and n6)	0.0121231	0.872859
eicosapentaenoate (EPA; 20:5n3)	Lipid	Polyunsaturated Fatty Acid (n3 and n6)	-0.0948905	0.851756
linolenate [alpha or gamma; (18:3n3 or 6)]	Lipid	Polyunsaturated Fatty Acid (n3 and n6)	0.271227	1.67438
stearidonate (18:4n3)	Lipid	Polyunsaturated Fatty Acid (n3 and n6)	0.263383	1.93565
adrenate (22:4n6)	Lipid	Polyunsaturated Fatty Acid (n3 and n6)	1.0627	0.930005
dihomo-linoleate (20:2n6)	Lipid	Polyunsaturated Fatty Acid (n3 and n6)	0.962064	2.0592
docosadienoate (22:2n6)	Lipid	Polyunsaturated Fatty Acid (n3 and n6)	1.54145	2.12253
docosahexaenoate (DHA; 22:6n3)	Lipid	Polyunsaturated Fatty Acid (n3 and n6)	0.71125	1.17808
docosapentaenoate (n3 DPA; 22:5n3)	Lipid	Polyunsaturated Fatty Acid (n3 and n6)	0.682033	1.49905
docosapentaenoate (n6 DPA; 22:5n6)	Lipid	Polyunsaturated Fatty Acid (n3 and n6)	0.0121231	0.872859
linoleate (18:2n6)	Lipid	Polyunsaturated Fatty Acid (n3 and n6)	0.866515	1.43941
beta-sitosterol	Lipid	Sterol	-0.00750989	1.03252
campesterol	Lipid	Sterol	0.679293	0.930521
cholesterol	Lipid	Sterol	1.73798	0.673322
inosine	Nucleotide	Purine Metabolism, (Hypo)Xanthine/Inosine containing	-4.74872	-1.87179
N1-methyladenosine	Nucleotide	Purine Metabolism, Adenine containing	-0.558505	0.337885
5-methyluridine (ribothymidine)	Nucleotide	Pyrimidine Metabolism, Uracil containing	-1.93608	-1.98406
uridine	Nucleotide	Pyrimidine Metabolism, Uracil containing	-1.4946	-0.290369
3-ureidopropionate	Nucleotide	Pyrimidine Metabolism, Uracil containing	1.73322	2.01333
uracil	Nucleotide	Pyrimidine Metabolism, Uracil containing	2.03269	1.21319
gamma-glutamylleucine	Peptide	Gamma-glutamyl Amino Acid	0.220315	1.17408
gamma-glutamylphenylalanine	Peptide	Gamma-glutamyl Amino Acid	1.40203	1.05098
4-ethylphenylsulfate	Xenobiotics	Benzoate Metabolism	-4.96783	-2.485
4-vinylphenol sulfate	Xenobiotics	Benzoate Metabolism	-6.63555	-3.7028
catechol sulfate	Xenobiotics	Benzoate Metabolism	-5.69844	-1.64637
4-vinylphenol sulfate	Xenobiotics	Benzoate Metabolism	-6.63555	-3.7028
2-aminophenol sulfate	Xenobiotics	Chemical	-5.35241	0
stachydrine	Xenobiotics	Food Component/Plant	-2.76642	-2.4386

## Sheet: 1J
metabolite	patient	stage	scaled intensity
bilirubin (E,E)*	3170	acute	3.5916
bilirubin (E,E)*	3173	acute	1.4039
bilirubin (E,E)*	3176	acute	1.008
bilirubin (E,E)*	3177	acute	1.0653
bilirubin (E,E)*	3182	acute	2.6922
bilirubin (E,E)*	3185	acute	6.489
bilirubin (E,E)*	3198	acute	3.133
bilirubin (E,E)*	3200	acute	1.3197
bilirubin (E,E)*	3201	acute	0.492
bilirubin (E,E)*	3209	acute	3.3481
bilirubin (E,E)*	3194	acute	1.5439
bilirubin (E,E)*	3185	convalescent	0.0452
bilirubin (E,E)*	3170	convalescent	0.3364
bilirubin (E,E)*	3173	convalescent	0.3018
bilirubin (E,E)*	3209	convalescent	0.1639
bilirubin (E,E)*	3176	convalescent	0.1039
bilirubin (E,E)*	3177	convalescent	0.2972
bilirubin (E,E)*	3182	convalescent	0.1955
bilirubin (E,E)*	3194	convalescent	0.2009
bilirubin (E,E)*	3198	convalescent	0.7818
bilirubin (E,E)*	3200	convalescent	0.3708
bilirubin (E,E)*	3201	convalescent	0.3989
bilirubin (Z,Z)	3170	acute	8.4589
bilirubin (Z,Z)	3173	acute	0.3841
bilirubin (Z,Z)	3176	acute	1.0205
bilirubin (Z,Z)	3177	acute	2.2223
bilirubin (Z,Z)	3182	acute	0.4585
bilirubin (Z,Z)	3185	acute	7.2884
bilirubin (Z,Z)	3198	acute	11.7237
bilirubin (Z,Z)	3200	acute	8.3397
bilirubin (Z,Z)	3201	acute	4.4559
bilirubin (Z,Z)	3209	acute	8.9272
bilirubin (Z,Z)	3194	acute	2.7868
bilirubin (Z,Z)	3185	convalescent	0.0522
bilirubin (Z,Z)	3170	convalescent	0.3547
bilirubin (Z,Z)	3173	convalescent	0.2712
bilirubin (Z,Z)	3209	convalescent	0.2756
bilirubin (Z,Z)	3176	convalescent	0.1471
bilirubin (Z,Z)	3177	convalescent	0.8952
bilirubin (Z,Z)	3182	convalescent	0.1329
bilirubin (Z,Z)	3194	convalescent	0.327
bilirubin (Z,Z)	3198	convalescent	1.0119
bilirubin (Z,Z)	3200	convalescent	0.9795
bilirubin (Z,Z)	3201	convalescent	0.2352
biliverdin	3170	acute	5.4143
biliverdin	3173	acute	1.7035
biliverdin	3176	acute	1.7252
biliverdin	3177	acute	1.8189
biliverdin	3182	acute	0.5256
biliverdin	3185	acute	4.7572
biliverdin	3198	acute	5.2074
biliverdin	3200	acute	4.0079
biliverdin	3201	acute	1.644
biliverdin	3209	acute	2.9892
biliverdin	3194	acute	2.88
biliverdin	3185	convalescent	0.0386
biliverdin	3170	convalescent	0.0601
biliverdin	3173	convalescent	0.0386
biliverdin	3209	convalescent	0.0596
biliverdin	3176	convalescent	0.0704
biliverdin	3177	convalescent	0.1068
biliverdin	3182	convalescent	0.0685
biliverdin	3194	convalescent	0.056
biliverdin	3198	convalescent	0.1694
biliverdin	3200	convalescent	0.1526
biliverdin	3201	convalescent	0.0414
