# Supplementary material for: Metabolic profiling during malaria reveals the role of the aryl hydrocarbon receptor in regulating kidney injury
Source: eLife. 2020 Oct 6;9:e60165. doi: 10.7554/eLife.60165 (PMC7538157; doi:10.7554/eLife.60165)
Supplement: Figure 2—figure supplement 1—source data 1. [file elife-60165-fig2-figsupp1-data1.xlsx]

## Sheet: 2 supplement 1A
tracking_id	sample	fpkm	organ	dpi	condition
Aadat	day0_0	40.7918	liver	0	uninfected
Aadat	day0_3	45.4519	liver	0	uninfected
Aadat	day0_1	36.2719	liver	0	uninfected
Aadat	day0_2	48.0561	liver	0	uninfected
Aadat	day7_0	17.9719	liver	7	infected
Aadat	day7_1	21.7285	liver	7	infected
Aadat	day8_0	28.2179	liver	8	infected
Aadat	day8_3	20.1504	liver	8	infected
Aadat	day8_2	25.1341	liver	8	infected
Aadat	day8_1	20.7753	liver	8	infected
Aadat	day8_4	26.2494	liver	8	infected
Aadat	day8_ui_0	53.332	liver	8	uninfected
Aadat	day8_ui_1	49.9277	liver	8	uninfected
Aadat	day9_1	36.3731	liver	9	infected
Aadat	day9_0	21.256	liver	9	infected
Aadat	day10_3	46.3958	liver	10	infected
Aadat	day10_0	17.8718	liver	10	infected
Aadat	day10_2	0.101356	liver	10	infected
Aadat	day10_1	18.8614	liver	10	infected
Aadat	day10_4	28.2946	liver	10	infected
Aadat	day10_ui_0	57.9634	liver	10	uninfected
Aadat	day10_ui_1	49.5971	liver	10	uninfected
Aadat	day11_1	16.6102	liver	11	infected
Aadat	day11_0	18.526	liver	11	infected
Afmid	day0_0	85.3352	liver	0	uninfected
Afmid	day0_3	60.9741	liver	0	uninfected
Afmid	day0_1	66.126	liver	0	uninfected
Afmid	day0_2	111.758	liver	0	uninfected
Afmid	day7_0	22.9338	liver	7	infected
Afmid	day7_1	16.7373	liver	7	infected
Afmid	day8_0	16.7062	liver	8	infected
Afmid	day8_3	36.3054	liver	8	infected
Afmid	day8_2	16.4162	liver	8	infected
Afmid	day8_1	26.1628	liver	8	infected
Afmid	day8_4	35.9305	liver	8	infected
Afmid	day8_ui_0	107.945	liver	8	uninfected
Afmid	day8_ui_1	74.3774	liver	8	uninfected
Afmid	day9_1	23.7348	liver	9	infected
Afmid	day9_0	9.16216	liver	9	infected
Afmid	day10_3	47.6328	liver	10	infected
Afmid	day10_0	22.1733	liver	10	infected
Afmid	day10_2	5.25342	liver	10	infected
Afmid	day10_1	7.60154	liver	10	infected
Afmid	day10_4	24.5404	liver	10	infected
Afmid	day10_ui_0	65.2872	liver	10	uninfected
Afmid	day10_ui_1	102.962	liver	10	uninfected
Afmid	day11_1	29.643	liver	11	infected
Afmid	day11_0	35.1033	liver	11	infected
Ccbl1	day0_0	114.058	liver	0	uninfected
Ccbl1	day0_3	97.361	liver	0	uninfected
Ccbl1	day0_1	86.2949	liver	0	uninfected
Ccbl1	day0_2	182.417	liver	0	uninfected
Ccbl1	day7_0	56.3507	liver	7	infected
Ccbl1	day7_1	26.4624	liver	7	infected
Ccbl1	day8_0	31.6779	liver	8	infected
Ccbl1	day8_3	27.4466	liver	8	infected
Ccbl1	day8_2	16.9876	liver	8	infected
Ccbl1	day8_1	26.2895	liver	8	infected
Ccbl1	day8_4	28.1705	liver	8	infected
Ccbl1	day8_ui_0	83.4241	liver	8	uninfected
Ccbl1	day8_ui_1	60.9858	liver	8	uninfected
Ccbl1	day9_1	21.202	liver	9	infected
Ccbl1	day9_0	19.1214	liver	9	infected
Ccbl1	day10_3	44.8885	liver	10	infected
Ccbl1	day10_0	31.4019	liver	10	infected
Ccbl1	day10_2	8.80903	liver	10	infected
Ccbl1	day10_1	23.2454	liver	10	infected
Ccbl1	day10_4	34.9877	liver	10	infected
Ccbl1	day10_ui_0	96.8116	liver	10	uninfected
Ccbl1	day10_ui_1	118.854	liver	10	uninfected
Ccbl1	day11_1	48.8613	liver	11	infected
Ccbl1	day11_0	60.5931	liver	11	infected
Ccbl2	day0_0	88.9683	liver	0	uninfected
Ccbl2	day0_3	101.503	liver	0	uninfected
Ccbl2	day0_1	99.2839	liver	0	uninfected
Ccbl2	day0_2	130.21	liver	0	uninfected
Ccbl2	day7_0	43.8983	liver	7	infected
Ccbl2	day7_1	23.6516	liver	7	infected
Ccbl2	day8_0	30.3971	liver	8	infected
Ccbl2	day8_3	34.2395	liver	8	infected
Ccbl2	day8_2	46.2541	liver	8	infected
Ccbl2	day8_1	44.7934	liver	8	infected
Ccbl2	day8_4	50.4751	liver	8	infected
Ccbl2	day8_ui_0	152.96	liver	8	uninfected
Ccbl2	day8_ui_1	99.0275	liver	8	uninfected
Ccbl2	day9_1	41.3327	liver	9	infected
Ccbl2	day9_0	25.2911	liver	9	infected
Ccbl2	day10_3	73.8772	liver	10	infected
Ccbl2	day10_0	48.8983	liver	10	infected
Ccbl2	day10_2	1.91491	liver	10	infected
Ccbl2	day10_1	19.5062	liver	10	infected
Ccbl2	day10_4	58.9187	liver	10	infected
Ccbl2	day10_ui_0	121.789	liver	10	uninfected
Ccbl2	day10_ui_1	135.045	liver	10	uninfected
Ccbl2	day11_1	60.4376	liver	11	infected
Ccbl2	day11_0	73.0297	liver	11	infected
Haao	day0_0	652.775	liver	0	uninfected
Haao	day0_3	494.333	liver	0	uninfected
Haao	day0_1	712.301	liver	0	uninfected
Haao	day0_2	955.764	liver	0	uninfected
Haao	day7_0	267.186	liver	7	infected
Haao	day7_1	130.357	liver	7	infected
Haao	day8_0	169.263	liver	8	infected
Haao	day8_3	234.639	liver	8	infected
Haao	day8_2	134.868	liver	8	infected
Haao	day8_1	142.245	liver	8	infected
Haao	day8_4	201.995	liver	8	infected
Haao	day8_ui_0	711.893	liver	8	uninfected
Haao	day8_ui_1	475.544	liver	8	uninfected
Haao	day9_1	153.823	liver	9	infected
Haao	day9_0	97.3689	liver	9	infected
Haao	day10_3	198.168	liver	10	infected
Haao	day10_0	141.042	liver	10	infected
Haao	day10_2	0.622019	liver	10	infected
Haao	day10_1	111.464	liver	10	infected
Haao	day10_4	131.674	liver	10	infected
Haao	day10_ui_0	494.674	liver	10	uninfected
Haao	day10_ui_1	672.011	liver	10	uninfected
Haao	day11_1	152.622	liver	11	infected
Haao	day11_0	186.516	liver	11	infected
Ido1	day0_0	0	liver	0	uninfected
Ido1	day0_3	0	liver	0	uninfected
Ido1	day0_1	0	liver	0	uninfected
Ido1	day0_2	0	liver	0	uninfected
Ido1	day7_0	0.550725	liver	7	infected
Ido1	day7_1	0.146395	liver	7	infected
Ido1	day8_0	0.380899	liver	8	infected
Ido1	day8_3	1.65453	liver	8	infected
Ido1	day8_2	1.15168	liver	8	infected
Ido1	day8_1	3.21945	liver	8	infected
Ido1	day8_4	2.32353	liver	8	infected
Ido1	day8_ui_0	0	liver	8	uninfected
Ido1	day8_ui_1	0.99833	liver	8	uninfected
Ido1	day9_1	1.94137	liver	9	infected
Ido1	day9_0	0.571339	liver	9	infected
Ido1	day10_3	0.250005	liver	10	infected
Ido1	day10_0	0.331841	liver	10	infected
Ido1	day10_2	3.79266	liver	10	infected
Ido1	day10_1	1.04708	liver	10	infected
Ido1	day10_4	0	liver	10	infected
Ido1	day10_ui_0	0.108096	liver	10	uninfected
Ido1	day10_ui_1	0	liver	10	uninfected
Ido1	day11_1	0.371268	liver	11	infected
Ido1	day11_0	0.403987	liver	11	infected
Kmo	day0_0	104.436	liver	0	uninfected
Kmo	day0_3	107.354	liver	0	uninfected
Kmo	day0_1	91.276	liver	0	uninfected
Kmo	day0_2	86.354	liver	0	uninfected
Kmo	day7_0	59.1235	liver	7	infected
Kmo	day7_1	65.074	liver	7	infected
Kmo	day8_0	69.2257	liver	8	infected
Kmo	day8_3	39.7593	liver	8	infected
Kmo	day8_2	52.0902	liver	8	infected
Kmo	day8_1	49.9873	liver	8	infected
Kmo	day8_4	41.7826	liver	8	infected
Kmo	day8_ui_0	128.575	liver	8	uninfected
Kmo	day8_ui_1	127.321	liver	8	uninfected
Kmo	day9_1	53.9702	liver	9	infected
Kmo	day9_0	32.7848	liver	9	infected
Kmo	day10_3	64.9384	liver	10	infected
Kmo	day10_0	39.0814	liver	10	infected
Kmo	day10_2	0.279666	liver	10	infected
Kmo	day10_1	32.8839	liver	10	infected
Kmo	day10_4	46.6413	liver	10	infected
Kmo	day10_ui_0	125.913	liver	10	uninfected
Kmo	day10_ui_1	88.5171	liver	10	uninfected
Kmo	day11_1	39.9152	liver	11	infected
Kmo	day11_0	39.215	liver	11	infected
Kynu	day0_0	64.3194	liver	0	uninfected
Kynu	day0_3	73.196	liver	0	uninfected
Kynu	day0_1	57.8238	liver	0	uninfected
Kynu	day0_2	63.4065	liver	0	uninfected
Kynu	day7_0	30.0327	liver	7	infected
Kynu	day7_1	31.2747	liver	7	infected
Kynu	day8_0	31.363	liver	8	infected
Kynu	day8_3	13.0393	liver	8	infected
Kynu	day8_2	28.0196	liver	8	infected
Kynu	day8_1	21.5163	liver	8	infected
Kynu	day8_4	17.0425	liver	8	infected
Kynu	day8_ui_0	75.752	liver	8	uninfected
Kynu	day8_ui_1	91.3895	liver	8	uninfected
Kynu	day9_1	22.7922	liver	9	infected
Kynu	day9_0	10.9198	liver	9	infected
Kynu	day10_3	30.677	liver	10	infected
Kynu	day10_0	17.6174	liver	10	infected
Kynu	day10_2	0.25514	liver	10	infected
Kynu	day10_1	9.54088	liver	10	infected
Kynu	day10_4	16.6312	liver	10	infected
Kynu	day10_ui_0	81.9503	liver	10	uninfected
Kynu	day10_ui_1	72.4701	liver	10	uninfected
Kynu	day11_1	22.891	liver	11	infected
Kynu	day11_0	19.711	liver	11	infected
Tdo2	day0_0	580.004	liver	0	uninfected
Tdo2	day0_3	707.813	liver	0	uninfected
Tdo2	day0_1	471.746	liver	0	uninfected
Tdo2	day0_2	546.376	liver	0	uninfected
Tdo2	day7_0	340.488	liver	7	infected
Tdo2	day7_1	458.792	liver	7	infected
Tdo2	day8_0	408.905	liver	8	infected
Tdo2	day8_3	766.863	liver	8	infected
Tdo2	day8_2	435.054	liver	8	infected
Tdo2	day8_1	593.225	liver	8	infected
Tdo2	day8_4	1006.03	liver	8	infected
Tdo2	day8_ui_0	813.227	liver	8	uninfected
Tdo2	day8_ui_1	904.385	liver	8	uninfected
Tdo2	day9_1	712.075	liver	9	infected
Tdo2	day9_0	428.629	liver	9	infected
Tdo2	day10_3	497.988	liver	10	infected
Tdo2	day10_0	409.468	liver	10	infected
Tdo2	day10_2	0.893066	liver	10	infected
Tdo2	day10_1	524.985	liver	10	infected
Tdo2	day10_4	381.361	liver	10	infected
Tdo2	day10_ui_0	712.435	liver	10	uninfected
Tdo2	day10_ui_1	523.038	liver	10	uninfected
Tdo2	day11_1	380.547	liver	11	infected
Tdo2	day11_0	280.984	liver	11	infected

## Sheet: 2 supplement 1B
mouse	dpi	infected	metabolite	log2(fold change)
0_1	0	UI	indoleacetate	1.7581
0_2	0	UI	indoleacetate	2.1863
0_3	0	UI	indoleacetate	3.4039
0_4	0	UI	indoleacetate	2.133
0_5	0	UI	indoleacetate	2.0705
1_1	1	I	indoleacetate	1.4341
1_2	1	I	indoleacetate	1.7567
1_3	1	I	indoleacetate	1.6512
1_4	1	I	indoleacetate	0.6516
1_5	1	I	indoleacetate	2.4528
2_1	2	I	indoleacetate	1.2454
2_2	2	I	indoleacetate	0.5545
2_3	2	I	indoleacetate	1.6426
2_4	2	I	indoleacetate	1.3072
2_5	2	I	indoleacetate	1.8577
3_1	3	I	indoleacetate	1.4544
3_2	3	I	indoleacetate	1.5168
3_3	3	I	indoleacetate	0.9946
3_4	3	I	indoleacetate	0.9256
3_5	3	I	indoleacetate	2.3375
4_1	4	I	indoleacetate	1.3894
4_2	4	I	indoleacetate	1.4173
4_3	4	I	indoleacetate	1.3163
4_4	4	I	indoleacetate	0.5659
4_5	4	I	indoleacetate	0.8875
5_6	5	UI	indoleacetate	1.4506
5_7	5	UI	indoleacetate	2.3935
5_1	5	I	indoleacetate	1.3
5_2	5	I	indoleacetate	1.3412
5_3	5	I	indoleacetate	1.5444
5_4	5	I	indoleacetate	0.5158
5_5	5	I	indoleacetate	1.3796
6_1	6	I	indoleacetate	1.5481
6_2	6	I	indoleacetate	0.7783
6_3	6	I	indoleacetate	1.3122
6_4	6	I	indoleacetate	0.9153
6_5	6	I	indoleacetate	0.9994
7_1	7	I	indoleacetate	1.9781
7_2	7	I	indoleacetate	0.9817
7_3	7	I	indoleacetate	1.3615
7_4	7	I	indoleacetate	0.9954
7_5	7	I	indoleacetate	0.9282
8_6	8	UI	indoleacetate	1.0346
8_7	8	UI	indoleacetate	0.9458
8_1	8	I	indoleacetate	0.5942
8_2	8	I	indoleacetate	0.5786
8_3	8	I	indoleacetate	0.3921
8_4	8	I	indoleacetate	0.8661
8_5	8	I	indoleacetate	0.6208
9_1	9	I	indoleacetate	0.8513
9_2	9	I	indoleacetate	0.3512
9_3	9	I	indoleacetate	0.3623
9_4	9	I	indoleacetate	0.5203
9_5	9	I	indoleacetate	0.7596
10_6	10	UI	indoleacetate	1.0497
10_7	10	UI	indoleacetate	2.6442
10_1	10	I	indoleacetate	0.3842
10_2	10	I	indoleacetate	0.4482
10_3	10	I	indoleacetate	0.4935
10_4	10	I	indoleacetate	0.6705
10_5	10	I	indoleacetate	0.3139
11_1	11	I	indoleacetate	0.5754
11_2	11	I	indoleacetate	0.4694
11_3	11	I	indoleacetate	0.3407
11_4	11	I	indoleacetate	0.4222
11_5	11	I	indoleacetate	1.5491
12_6	12	UI	indoleacetate	1.4726
12_7	12	UI	indoleacetate	0.8398
12_1	12	I	indoleacetate	0.8891
12_2	12	I	indoleacetate	1.5828
12_3	12	I	indoleacetate	1.2444
12_4	12	I	indoleacetate	1.0675
12_5	12	I	indoleacetate	2.1893
13_1	13	I	indoleacetate	1.3025
13_2	13	I	indoleacetate	4.1108
13_3	13	I	indoleacetate	2.8582
13_4	13	I	indoleacetate	1.5111
13_5	13	I	indoleacetate	1.0433
14_1	14	I	indoleacetate	0.8858
14_2	14	I	indoleacetate	0.502
14_3	14	I	indoleacetate	2.0224
14_4	14	I	indoleacetate	1.2794
14_5	14	I	indoleacetate	1.0006
15_6	15	UI	indoleacetate	0.611
15_7	15	UI	indoleacetate	0.4892
15_1	15	I	indoleacetate	0.6644
15_2	15	I	indoleacetate	0.9284
15_3	15	I	indoleacetate	1.0786
15_4	15	I	indoleacetate	0.9578
15_5	15	I	indoleacetate	1.6593
16_1	16	I	indoleacetate	0.6747
16_2	16	I	indoleacetate	0.5071
16_3	16	I	indoleacetate	0.9231
16_4	16	I	indoleacetate	1.5307
16_5	16	I	indoleacetate	0.5588
17_1	17	I	indoleacetate	0.8026
17_2	17	I	indoleacetate	0.57
17_3	17	I	indoleacetate	0.9952
17_4	17	I	indoleacetate	1.0768
17_5	17	I	indoleacetate	0.9994
18_1	18	I	indoleacetate	0.5297
18_2	18	I	indoleacetate	1.0634
18_3	18	I	indoleacetate	1.2855
18_4	18	I	indoleacetate	1.6748
18_5	18	I	indoleacetate	5.0684
19_6	19	UI	indoleacetate	1.1365
19_7	19	UI	indoleacetate	2.8785
19_1	19	I	indoleacetate	0.753
19_2	19	I	indoleacetate	1.2836
19_3	19	I	indoleacetate	1.0374
19_4	19	I	indoleacetate	1.2795
19_5	19	I	indoleacetate	0.6903
20_1	20	I	indoleacetate	0.6626
20_2	20	I	indoleacetate	0.8434
20_3	20	I	indoleacetate	1.3364
20_4	20	I	indoleacetate	0.2737
20_5	20	I	indoleacetate	0.4809
21_1	21	I	indoleacetate	0.3092
21_2	21	I	indoleacetate	0.6522
21_3	21	I	indoleacetate	0.8646
21_4	21	I	indoleacetate	0.589
21_5	21	I	indoleacetate	2.3659
22_1	22	I	indoleacetate	0.8871
22_2	22	I	indoleacetate	1.9563
22_3	22	I	indoleacetate	0.6674
22_4	22	I	indoleacetate	0.5352
22_5	22	I	indoleacetate	1.6721
23_1	23	I	indoleacetate	0.9866
23_2	23	I	indoleacetate	0.9328
23_3	23	I	indoleacetate	1.1179
23_4	23	I	indoleacetate	1.5954
23_5	23	I	indoleacetate	1.0456
24_1	24	I	indoleacetate	0.4855
24_2	24	I	indoleacetate	1.1128
24_3	24	I	indoleacetate	1.0937
24_4	24	I	indoleacetate	1.4652
24_5	24	I	indoleacetate	0.9329
25_6	25	UI	indoleacetate	1.157
25_7	25	UI	indoleacetate	1.0218
25_1	25	I	indoleacetate	0.5583
25_2	25	I	indoleacetate	0.6959
25_3	25	I	indoleacetate	0.4443
25_4	25	I	indoleacetate	1.3497
25_5	25	I	indoleacetate	0.5158
