# Supplementary material for: Metabolic profiling during malaria reveals the role of the aryl hydrocarbon receptor in regulating kidney injury
Source: eLife. 2020 Oct 6;9:e60165. doi: 10.7554/eLife.60165 (PMC7538157; doi:10.7554/eLife.60165)
Supplement: Figure 2—source data 1. [file elife-60165-fig2-data1.xlsx]

## Sheet: 2B
mouse	dpi	infected	metabolite	log2(fold change)
0_1	0	UI	kynurenate	0.6805
0_2	0	UI	kynurenate	1.2605
0_3	0	UI	kynurenate	1.2204
0_4	0	UI	kynurenate	0.6979
0_5	0	UI	kynurenate	1.155
1_1	1	I	kynurenate	0.855
1_2	1	I	kynurenate	0.8315
1_3	1	I	kynurenate	1.1218
1_4	1	I	kynurenate	1.1395
1_5	1	I	kynurenate	0.7643
2_1	2	I	kynurenate	1.0113
2_2	2	I	kynurenate	1.1862
2_3	2	I	kynurenate	1.6368
2_4	2	I	kynurenate	1.7565
2_5	2	I	kynurenate	1.4095
3_1	3	I	kynurenate	0.9109
3_2	3	I	kynurenate	0.7592
3_3	3	I	kynurenate	0.8003
3_4	3	I	kynurenate	0.8488
3_5	3	I	kynurenate	1.5712
4_1	4	I	kynurenate	1.0632
4_2	4	I	kynurenate	0.7551
4_3	4	I	kynurenate	1.27
4_4	4	I	kynurenate	0.7517
4_5	4	I	kynurenate	0.5766
5_6	5	UI	kynurenate	0.5665
5_7	5	UI	kynurenate	0.9382
5_1	5	I	kynurenate	1.0707
5_2	5	I	kynurenate	0.9403
5_3	5	I	kynurenate	0.813
5_4	5	I	kynurenate	1.16
5_5	5	I	kynurenate	0.7575
6_1	6	I	kynurenate	1.8215
6_2	6	I	kynurenate	1.1425
6_3	6	I	kynurenate	1.1207
6_4	6	I	kynurenate	0.8363
6_5	6	I	kynurenate	1.5449
7_1	7	I	kynurenate	1.6069
7_2	7	I	kynurenate	1.8206
7_3	7	I	kynurenate	2.1884
7_4	7	I	kynurenate	1.1371
7_5	7	I	kynurenate	1.671
8_6	8	UI	kynurenate	0.7139
8_7	8	UI	kynurenate	0.9477
8_1	8	I	kynurenate	1.7002
8_2	8	I	kynurenate	1.4748
8_3	8	I	kynurenate	1.944
8_4	8	I	kynurenate	2.5584
8_5	8	I	kynurenate	1.7437
9_1	9	I	kynurenate	1.3574
9_2	9	I	kynurenate	1.3691
9_3	9	I	kynurenate	1.095
9_4	9	I	kynurenate	0.8083
9_5	9	I	kynurenate	1.5285
10_6	10	UI	kynurenate	1.3289
10_7	10	UI	kynurenate	1.0071
10_1	10	I	kynurenate	0.6744
10_2	10	I	kynurenate	0.7905
10_3	10	I	kynurenate	0.9799
10_4	10	I	kynurenate	0.9589
10_5	10	I	kynurenate	0.4309
11_1	11	I	kynurenate	0.7124
11_2	11	I	kynurenate	0.6318
11_3	11	I	kynurenate	1.0386
11_4	11	I	kynurenate	2.2727
11_5	11	I	kynurenate	0.8457
12_6	12	UI	kynurenate	0.7111
12_7	12	UI	kynurenate	1.0772
12_1	12	I	kynurenate	1.2494
12_2	12	I	kynurenate	1.4537
12_3	12	I	kynurenate	0.8456
12_4	12	I	kynurenate	0.6781
12_5	12	I	kynurenate	1.0652
13_1	13	I	kynurenate	0.6889
13_2	13	I	kynurenate	1.355
13_3	13	I	kynurenate	1.688
13_4	13	I	kynurenate	0.9281
13_5	13	I	kynurenate	1.1151
14_1	14	I	kynurenate	0.7198
14_2	14	I	kynurenate	0.7872
14_3	14	I	kynurenate	1.408
14_4	14	I	kynurenate	1.3609
14_5	14	I	kynurenate	0.9643
15_6	15	UI	kynurenate	0.4968
15_7	15	UI	kynurenate	0.4002
15_1	15	I	kynurenate	1.1631
15_2	15	I	kynurenate	1.2234
15_3	15	I	kynurenate	1.5126
15_4	15	I	kynurenate	1.0943
15_5	15	I	kynurenate	1.0033
16_1	16	I	kynurenate	1.0118
16_2	16	I	kynurenate	0.9896
16_3	16	I	kynurenate	1.2063
16_4	16	I	kynurenate	1.0024
16_5	16	I	kynurenate	1.5547
17_1	17	I	kynurenate	0.9078
17_2	17	I	kynurenate	0.9101
17_3	17	I	kynurenate	0.9835
17_4	17	I	kynurenate	1.1216
17_5	17	I	kynurenate	1.2215
18_1	18	I	kynurenate	1.4445
18_2	18	I	kynurenate	0.7999
18_3	18	I	kynurenate	1.1566
18_4	18	I	kynurenate	1.3219
18_5	18	I	kynurenate	2.4406
19_6	19	UI	kynurenate	0.6489
19_7	19	UI	kynurenate	0.8866
19_1	19	I	kynurenate	0.7632
19_2	19	I	kynurenate	1.8792
19_3	19	I	kynurenate	0.8629
19_4	19	I	kynurenate	0.9357
19_5	19	I	kynurenate	0.8022
20_1	20	I	kynurenate	1.0316
20_2	20	I	kynurenate	1.0814
20_3	20	I	kynurenate	1.0879
20_4	20	I	kynurenate	0.5673
20_5	20	I	kynurenate	0.9633
21_1	21	I	kynurenate	0.6269
21_2	21	I	kynurenate	0.7654
21_3	21	I	kynurenate	0.9976
21_4	21	I	kynurenate	0.5652
21_5	21	I	kynurenate	1.1108
22_1	22	I	kynurenate	0.8556
22_2	22	I	kynurenate	1.2115
22_3	22	I	kynurenate	1.1322
22_4	22	I	kynurenate	0.8755
22_5	22	I	kynurenate	0.9394
23_1	23	I	kynurenate	1.0825
23_2	23	I	kynurenate	0.5515
23_3	23	I	kynurenate	0.3743
23_4	23	I	kynurenate	1.3791
23_5	23	I	kynurenate	0.8912
24_1	24	I	kynurenate	0.9037
24_2	24	I	kynurenate	0.9249
24_3	24	I	kynurenate	0.5018
24_4	24	I	kynurenate	0.9184
24_5	24	I	kynurenate	1.2526
25_6	25	UI	kynurenate	1.233
25_7	25	UI	kynurenate	0.7478
25_1	25	I	kynurenate	0.9431
25_2	25	I	kynurenate	0.9128
25_3	25	I	kynurenate	0.5417
25_4	25	I	kynurenate	0.8177
25_5	25	I	kynurenate	0.8008
0_1	0	UI	kynurenine	0.344
0_2	0	UI	kynurenine	0.4036
0_3	0	UI	kynurenine	0.3862
0_4	0	UI	kynurenine	0.3552
0_5	0	UI	kynurenine	0.5337
1_1	1	I	kynurenine	0.3713
1_2	1	I	kynurenine	0.463
1_3	1	I	kynurenine	0.3413
1_4	1	I	kynurenine	0.4721
1_5	1	I	kynurenine	0.3063
2_1	2	I	kynurenine	0.4242
2_2	2	I	kynurenine	0.4844
2_3	2	I	kynurenine	0.4496
2_4	2	I	kynurenine	0.5261
2_5	2	I	kynurenine	0.6929
3_1	3	I	kynurenine	0.2566
3_2	3	I	kynurenine	0.4958
3_3	3	I	kynurenine	0.3256
3_4	3	I	kynurenine	0.3247
3_5	3	I	kynurenine	0.4771
4_1	4	I	kynurenine	0.6489
4_2	4	I	kynurenine	0.5115
4_3	4	I	kynurenine	0.3098
4_4	4	I	kynurenine	0.4329
4_5	4	I	kynurenine	0.2498
5_6	5	UI	kynurenine	0.3879
5_7	5	UI	kynurenine	0.5982
5_1	5	I	kynurenine	0.8343
5_2	5	I	kynurenine	0.5097
5_3	5	I	kynurenine	0.6128
5_4	5	I	kynurenine	0.9075
5_5	5	I	kynurenine	0.9117
6_1	6	I	kynurenine	1.422
6_2	6	I	kynurenine	0.9572
6_3	6	I	kynurenine	1.0436
6_4	6	I	kynurenine	1.3211
6_5	6	I	kynurenine	1.2031
7_1	7	I	kynurenine	1.4055
7_2	7	I	kynurenine	1.3138
7_3	7	I	kynurenine	2.145
7_4	7	I	kynurenine	2.2092
7_5	7	I	kynurenine	1.1843
8_6	8	UI	kynurenine	0.4102
8_7	8	UI	kynurenine	0.3567
8_1	8	I	kynurenine	2.7504
8_2	8	I	kynurenine	2.6206
8_3	8	I	kynurenine	2.1914
8_4	8	I	kynurenine	2.7513
8_5	8	I	kynurenine	1.8431
9_1	9	I	kynurenine	2.2055
9_2	9	I	kynurenine	2.0992
9_3	9	I	kynurenine	2.7823
9_4	9	I	kynurenine	2.0951
9_5	9	I	kynurenine	1.6171
10_6	10	UI	kynurenine	0.536
10_7	10	UI	kynurenine	0.5244
10_1	10	I	kynurenine	2.1942
10_2	10	I	kynurenine	2.7711
10_3	10	I	kynurenine	1.6408
10_4	10	I	kynurenine	2.3919
10_5	10	I	kynurenine	2.0021
11_1	11	I	kynurenine	1.4919
11_2	11	I	kynurenine	1.5546
11_3	11	I	kynurenine	1.9586
11_4	11	I	kynurenine	2.1818
11_5	11	I	kynurenine	1.5436
12_6	12	UI	kynurenine	0.3458
12_7	12	UI	kynurenine	0.5415
12_1	12	I	kynurenine	1.6065
12_2	12	I	kynurenine	1.8175
12_3	12	I	kynurenine	1.2763
12_4	12	I	kynurenine	1.2931
12_5	12	I	kynurenine	1.4819
13_1	13	I	kynurenine	1.6519
13_2	13	I	kynurenine	1.3756
13_3	13	I	kynurenine	2.189
13_4	13	I	kynurenine	1.0903
13_5	13	I	kynurenine	1.7423
14_1	14	I	kynurenine	1.2479
14_2	14	I	kynurenine	1.3545
14_3	14	I	kynurenine	2.0178
14_4	14	I	kynurenine	1.354
14_5	14	I	kynurenine	1.1952
15_6	15	UI	kynurenine	0.452
15_7	15	UI	kynurenine	0.4864
15_1	15	I	kynurenine	1.3887
15_2	15	I	kynurenine	1.4011
15_3	15	I	kynurenine	1.4483
15_4	15	I	kynurenine	1.3914
15_5	15	I	kynurenine	1.4942
16_1	16	I	kynurenine	1.3696
16_2	16	I	kynurenine	1.2609
16_3	16	I	kynurenine	1.2527
16_4	16	I	kynurenine	1.4193
16_5	16	I	kynurenine	0.9014
17_1	17	I	kynurenine	1.0169
17_2	17	I	kynurenine	1.2333
17_3	17	I	kynurenine	1.1838
17_4	17	I	kynurenine	1.1845
17_5	17	I	kynurenine	1.1669
18_1	18	I	kynurenine	1.173
18_2	18	I	kynurenine	0.9648
18_3	18	I	kynurenine	1.0872
18_4	18	I	kynurenine	1.3571
18_5	18	I	kynurenine	1.6604
19_6	19	UI	kynurenine	0.3816
19_7	19	UI	kynurenine	0.539
19_1	19	I	kynurenine	1.0089
19_2	19	I	kynurenine	1.4836
19_3	19	I	kynurenine	1.0791
19_4	19	I	kynurenine	0.7549
19_5	19	I	kynurenine	1.6527
20_1	20	I	kynurenine	1.0536
20_2	20	I	kynurenine	1.0535
20_3	20	I	kynurenine	0.9795
20_4	20	I	kynurenine	1.249
20_5	20	I	kynurenine	0.8681
21_1	21	I	kynurenine	0.8299
21_2	21	I	kynurenine	0.8296
21_3	21	I	kynurenine	0.936
21_4	21	I	kynurenine	0.7754
21_5	21	I	kynurenine	0.8396
22_1	22	I	kynurenine	0.7917
22_2	22	I	kynurenine	0.589
22_3	22	I	kynurenine	0.6763
22_4	22	I	kynurenine	0.6814
22_5	22	I	kynurenine	0.7936
23_1	23	I	kynurenine	0.8123
23_2	23	I	kynurenine	0.9708
23_3	23	I	kynurenine	0.5985
23_4	23	I	kynurenine	1.049
23_5	23	I	kynurenine	0.9911
24_1	24	I	kynurenine	1.1002
24_2	24	I	kynurenine	0.4948
24_3	24	I	kynurenine	0.8696
24_4	24	I	kynurenine	0.6321
24_5	24	I	kynurenine	0.9113
25_6	25	UI	kynurenine	0.3067
25_7	25	UI	kynurenine	0.3566
25_1	25	I	kynurenine	1.0853
25_2	25	I	kynurenine	0.9739
25_3	25	I	kynurenine	0.851
25_4	25	I	kynurenine	0.5212
25_5	25	I	kynurenine	0.8899
0_1	0	UI	quinolinate	1.1126
0_2	0	UI	quinolinate	0.7263
0_3	0	UI	quinolinate	0.2727
0_4	0	UI	quinolinate	1.353
0_5	0	UI	quinolinate	0.3997
1_1	1	I	quinolinate	0.2727
1_2	1	I	quinolinate	0.2727
1_3	1	I	quinolinate	0.2727
1_4	1	I	quinolinate	0.3321
1_5	1	I	quinolinate	0.2727
2_1	2	I	quinolinate	0.2727
2_2	2	I	quinolinate	1.0141
2_3	2	I	quinolinate	1.0329
2_4	2	I	quinolinate	0.2727
2_5	2	I	quinolinate	0.2727
3_1	3	I	quinolinate	0.2727
3_2	3	I	quinolinate	0.2727
3_3	3	I	quinolinate	0.2727
3_4	3	I	quinolinate	0.2727
3_5	3	I	quinolinate	0.8713
4_1	4	I	quinolinate	1.4793
4_2	4	I	quinolinate	0.2968
4_3	4	I	quinolinate	0.2727
4_4	4	I	quinolinate	0.2727
4_5	4	I	quinolinate	0.5402
5_6	5	UI	quinolinate	0.2727
5_7	5	UI	quinolinate	0.2727
5_1	5	I	quinolinate	0.2727
5_2	5	I	quinolinate	0.3882
5_3	5	I	quinolinate	0.7081
5_4	5	I	quinolinate	0.2727
5_5	5	I	quinolinate	0.2727
6_1	6	I	quinolinate	1.4357
6_2	6	I	quinolinate	0.7072
6_3	6	I	quinolinate	1.2999
6_4	6	I	quinolinate	1.0454
6_5	6	I	quinolinate	1.0836
7_1	7	I	quinolinate	1.5246
7_2	7	I	quinolinate	1.3854
7_3	7	I	quinolinate	1.7748
7_4	7	I	quinolinate	1.3439
7_5	7	I	quinolinate	0.9395
8_6	8	UI	quinolinate	0.4665
8_7	8	UI	quinolinate	0.493
8_1	8	I	quinolinate	4.0536
8_2	8	I	quinolinate	3.4368
8_3	8	I	quinolinate	3.3383
8_4	8	I	quinolinate	1.8722
8_5	8	I	quinolinate	2.0118
9_1	9	I	quinolinate	2.98
9_2	9	I	quinolinate	2.4863
9_3	9	I	quinolinate	2.9895
9_4	9	I	quinolinate	2.0929
9_5	9	I	quinolinate	1.5033
10_6	10	UI	quinolinate	0.5997
10_7	10	UI	quinolinate	0.2727
10_1	10	I	quinolinate	1.1235
10_2	10	I	quinolinate	2.0804
10_3	10	I	quinolinate	1.2341
10_4	10	I	quinolinate	1.5727
10_5	10	I	quinolinate	0.9997
11_1	11	I	quinolinate	1.3864
11_2	11	I	quinolinate	1.3899
11_3	11	I	quinolinate	1.0995
11_4	11	I	quinolinate	3.0737
11_5	11	I	quinolinate	0.7642
12_6	12	UI	quinolinate	0.2727
12_7	12	UI	quinolinate	1.0664
12_1	12	I	quinolinate	0.9671
12_2	12	I	quinolinate	1.4461
12_3	12	I	quinolinate	0.2727
12_4	12	I	quinolinate	0.2727
12_5	12	I	quinolinate	0.7483
13_1	13	I	quinolinate	0.2727
13_2	13	I	quinolinate	0.5319
13_3	13	I	quinolinate	1.0138
13_4	13	I	quinolinate	0.2727
13_5	13	I	quinolinate	0.9792
14_1	14	I	quinolinate	0.2727
14_2	14	I	quinolinate	0.2727
14_3	14	I	quinolinate	0.2727
14_4	14	I	quinolinate	0.2727
14_5	14	I	quinolinate	0.2727
15_6	15	UI	quinolinate	0.8265
15_7	15	UI	quinolinate	0.2727
15_1	15	I	quinolinate	0.8637
15_2	15	I	quinolinate	0.2727
15_3	15	I	quinolinate	0.5407
15_4	15	I	quinolinate	0.6456
15_5	15	I	quinolinate	0.2727
16_1	16	I	quinolinate	1.0825
16_2	16	I	quinolinate	1.0646
16_3	16	I	quinolinate	0.4971
16_4	16	I	quinolinate	0.8274
16_5	16	I	quinolinate	1.0517
17_1	17	I	quinolinate	1.7725
17_2	17	I	quinolinate	1.6421
17_3	17	I	quinolinate	1.1249
17_4	17	I	quinolinate	0.2727
17_5	17	I	quinolinate	0.3701
18_1	18	I	quinolinate	0.7322
18_2	18	I	quinolinate	0.9345
18_3	18	I	quinolinate	0.87
18_4	18	I	quinolinate	1.1012
18_5	18	I	quinolinate	0.2727
19_6	19	UI	quinolinate	0.2727
19_7	19	UI	quinolinate	1.108
19_1	19	I	quinolinate	1.0428
19_2	19	I	quinolinate	1.4356
19_3	19	I	quinolinate	2.1172
19_4	19	I	quinolinate	1
19_5	19	I	quinolinate	0.2727
20_1	20	I	quinolinate	0.9219
20_2	20	I	quinolinate	0.2727
20_3	20	I	quinolinate	0.6721
20_4	20	I	quinolinate	0.9785
20_5	20	I	quinolinate	0.5718
21_1	21	I	quinolinate	0.2727
21_2	21	I	quinolinate	0.2727
21_3	21	I	quinolinate	0.4728
21_4	21	I	quinolinate	0.6092
21_5	21	I	quinolinate	0.2727
22_1	22	I	quinolinate	0.2727
22_2	22	I	quinolinate	0.7562
22_3	22	I	quinolinate	0.2727
22_4	22	I	quinolinate	0.5131
22_5	22	I	quinolinate	0.5108
23_1	23	I	quinolinate	0.2727
23_2	23	I	quinolinate	0.2727
23_3	23	I	quinolinate	0.2727
23_4	23	I	quinolinate	0.9129
23_5	23	I	quinolinate	0.2727
24_1	24	I	quinolinate	0.8326
24_2	24	I	quinolinate	0.5502
24_3	24	I	quinolinate	0.2727
24_4	24	I	quinolinate	0.2727
24_5	24	I	quinolinate	0.2727
25_6	25	UI	quinolinate	0.2727
25_7	25	UI	quinolinate	0.8269
25_1	25	I	quinolinate	0.2727
25_2	25	I	quinolinate	0.7165
25_3	25	I	quinolinate	0.6299
25_4	25	I	quinolinate	0.2727
25_5	25	I	quinolinate	0.2727
0_1	0	UI	tryptophan	1.1482
0_2	0	UI	tryptophan	1.0623
0_3	0	UI	tryptophan	1.3857
0_4	0	UI	tryptophan	1.0809
0_5	0	UI	tryptophan	1.1624
1_1	1	I	tryptophan	1.127
1_2	1	I	tryptophan	1.0655
1_3	1	I	tryptophan	0.9448
1_4	1	I	tryptophan	0.9865
1_5	1	I	tryptophan	1.1434
2_1	2	I	tryptophan	0.9548
2_2	2	I	tryptophan	1.0668
2_3	2	I	tryptophan	0.7034
2_4	2	I	tryptophan	1.0839
2_5	2	I	tryptophan	1.1304
3_1	3	I	tryptophan	1.0467
3_2	3	I	tryptophan	1.0981
3_3	3	I	tryptophan	1.0381
3_4	3	I	tryptophan	1.1778
3_5	3	I	tryptophan	1.2433
4_1	4	I	tryptophan	1.3101
4_2	4	I	tryptophan	1.0945
4_3	4	I	tryptophan	1.0794
4_4	4	I	tryptophan	0.82
4_5	4	I	tryptophan	0.9216
5_6	5	UI	tryptophan	1.0353
5_7	5	UI	tryptophan	1.1413
5_1	5	I	tryptophan	1.2573
5_2	5	I	tryptophan	1.1552
5_3	5	I	tryptophan	1.1096
5_4	5	I	tryptophan	1.0705
5_5	5	I	tryptophan	1.1602
6_1	6	I	tryptophan	1.0749
6_2	6	I	tryptophan	1.1644
6_3	6	I	tryptophan	1.0891
6_4	6	I	tryptophan	0.9702
6_5	6	I	tryptophan	1.0189
7_1	7	I	tryptophan	0.77
7_2	7	I	tryptophan	1.015
7_3	7	I	tryptophan	0.8283
7_4	7	I	tryptophan	0.86
7_5	7	I	tryptophan	0.8328
8_6	8	UI	tryptophan	1.1491
8_7	8	UI	tryptophan	1.0796
8_1	8	I	tryptophan	0.9357
8_2	8	I	tryptophan	0.9155
8_3	8	I	tryptophan	0.6819
8_4	8	I	tryptophan	0.9019
8_5	8	I	tryptophan	1.037
9_1	9	I	tryptophan	0.6847
9_2	9	I	tryptophan	0.7849
9_3	9	I	tryptophan	0.7331
9_4	9	I	tryptophan	0.7531
9_5	9	I	tryptophan	0.8055
10_6	10	UI	tryptophan	0.9898
10_7	10	UI	tryptophan	1.3654
10_1	10	I	tryptophan	0.8371
10_2	10	I	tryptophan	0.7844
10_3	10	I	tryptophan	0.7106
10_4	10	I	tryptophan	0.7421
10_5	10	I	tryptophan	0.686
11_1	11	I	tryptophan	0.7441
11_2	11	I	tryptophan	0.7684
11_3	11	I	tryptophan	0.9113
11_4	11	I	tryptophan	0.9274
11_5	11	I	tryptophan	0.9823
12_6	12	UI	tryptophan	1.1304
12_7	12	UI	tryptophan	1.0188
12_1	12	I	tryptophan	1.0286
12_2	12	I	tryptophan	1.0444
12_3	12	I	tryptophan	0.9425
12_4	12	I	tryptophan	0.6968
12_5	12	I	tryptophan	0.9557
13_1	13	I	tryptophan	1.0072
13_2	13	I	tryptophan	0.9588
13_3	13	I	tryptophan	1.1883
13_4	13	I	tryptophan	0.9158
13_5	13	I	tryptophan	0.9005
14_1	14	I	tryptophan	0.9719
14_2	14	I	tryptophan	0.9176
14_3	14	I	tryptophan	1.1676
14_4	14	I	tryptophan	0.9569
14_5	14	I	tryptophan	0.8978
15_6	15	UI	tryptophan	0.9351
15_7	15	UI	tryptophan	1.0875
15_1	15	I	tryptophan	0.996
15_2	15	I	tryptophan	1.0108
15_3	15	I	tryptophan	0.9624
15_4	15	I	tryptophan	0.8875
15_5	15	I	tryptophan	0.9771
16_1	16	I	tryptophan	1.035
16_2	16	I	tryptophan	0.8489
16_3	16	I	tryptophan	1.0834
16_4	16	I	tryptophan	0.8431
16_5	16	I	tryptophan	0.9228
17_1	17	I	tryptophan	0.9411
17_2	17	I	tryptophan	1.0681
17_3	17	I	tryptophan	0.8674
17_4	17	I	tryptophan	0.9534
17_5	17	I	tryptophan	1.0254
18_1	18	I	tryptophan	1.0515
18_2	18	I	tryptophan	0.9441
18_3	18	I	tryptophan	1.094
18_4	18	I	tryptophan	1.1339
18_5	18	I	tryptophan	1.2313
19_6	19	UI	tryptophan	1.3139
19_7	19	UI	tryptophan	1.1861
19_1	19	I	tryptophan	0.9863
19_2	19	I	tryptophan	0.924
19_3	19	I	tryptophan	0.9829
19_4	19	I	tryptophan	0.6964
19_5	19	I	tryptophan	0.9713
20_1	20	I	tryptophan	0.8247
20_2	20	I	tryptophan	1.0161
20_3	20	I	tryptophan	0.9691
20_4	20	I	tryptophan	1.0122
20_5	20	I	tryptophan	0.8115
21_1	21	I	tryptophan	0.9689
21_2	21	I	tryptophan	0.9172
21_3	21	I	tryptophan	0.9659
21_4	21	I	tryptophan	0.6185
21_5	21	I	tryptophan	1.004
22_1	22	I	tryptophan	0.9205
22_2	22	I	tryptophan	1.312
22_3	22	I	tryptophan	0.9497
22_4	22	I	tryptophan	1.0445
22_5	22	I	tryptophan	1.0776
23_1	23	I	tryptophan	1.0238
23_2	23	I	tryptophan	1.0062
23_3	23	I	tryptophan	0.9695
23_4	23	I	tryptophan	1.0994
23_5	23	I	tryptophan	1.2213
24_1	24	I	tryptophan	1.0115
24_2	24	I	tryptophan	1.1571
24_3	24	I	tryptophan	0.9479
24_4	24	I	tryptophan	1.129
24_5	24	I	tryptophan	1.1154
25_6	25	UI	tryptophan	1.4123
25_7	25	UI	tryptophan	1.2645
25_1	25	I	tryptophan	1.0124
25_2	25	I	tryptophan	0.9566
25_3	25	I	tryptophan	0.8187
25_4	25	I	tryptophan	0.8459
25_5	25	I	tryptophan	1.0792

## Sheet: 2C
metabolite	patient	stage	scaled intensity
kynurenate	3170	acute	1.7358
kynurenate	3173	acute	1.9237
kynurenate	3176	acute	0.8211
kynurenate	3177	acute	1.5878
kynurenate	3182	acute	2.008
kynurenate	3185	acute	3.1172
kynurenate	3198	acute	1.5787
kynurenate	3200	acute	0.6547
kynurenate	3201	acute	2.8888
kynurenate	3209	acute	2.4923
kynurenate	3194	acute	7.1277
kynurenate	3185	convalescent	0.2815
kynurenate	3170	convalescent	0.1291
kynurenate	3173	convalescent	0.2548
kynurenate	3209	convalescent	0.2673
kynurenate	3176	convalescent	0.1984
kynurenate	3177	convalescent	0.286
kynurenate	3182	convalescent	0.3329
kynurenate	3194	convalescent	0.4588
kynurenate	3198	convalescent	0.629
kynurenate	3200	convalescent	0.2808
kynurenate	3201	convalescent	0.2604
kynurenine	3170	acute	1.1032
kynurenine	3173	acute	1.4637
kynurenine	3176	acute	1.5757
kynurenine	3177	acute	1.8638
kynurenine	3182	acute	1.4231
kynurenine	3185	acute	0.8144
kynurenine	3198	acute	1.3448
kynurenine	3200	acute	1.0205
kynurenine	3201	acute	1.7607
kynurenine	3209	acute	3.2207
kynurenine	3194	acute	2.128
kynurenine	3185	convalescent	0.2393
kynurenine	3170	convalescent	0.3105
kynurenine	3173	convalescent	0.43
kynurenine	3209	convalescent	0.3291
kynurenine	3176	convalescent	0.4232
kynurenine	3177	convalescent	0.3391
kynurenine	3182	convalescent	0.5823
kynurenine	3194	convalescent	0.4286
kynurenine	3198	convalescent	0.8223
kynurenine	3200	convalescent	0.5846
kynurenine	3201	convalescent	0.2474
tryptophan	3170	acute	1.3231
tryptophan	3173	acute	1.0468
tryptophan	3176	acute	1.5015
tryptophan	3177	acute	0.2486
tryptophan	3182	acute	0.9095
tryptophan	3185	acute	0.3609
tryptophan	3198	acute	2.1548
tryptophan	3200	acute	1.2316
tryptophan	3201	acute	1.7842
tryptophan	3209	acute	1.7018
tryptophan	3194	acute	1.462
tryptophan	3185	convalescent	0.4185
tryptophan	3170	convalescent	0.6136
tryptophan	3173	convalescent	0.8094
tryptophan	3209	convalescent	0.381
tryptophan	3176	convalescent	0.7038
tryptophan	3177	convalescent	0.9455
tryptophan	3182	convalescent	0.8402
tryptophan	3194	convalescent	0.8044
tryptophan	3198	convalescent	2.214
tryptophan	3200	convalescent	1.2845
tryptophan	3201	convalescent	0.5847

## Sheet: 2D
mouse	infected	dpi	variable	uM
1	I	9	bilirubin	17.5306
2	I	9	bilirubin	18.1329
3	I	9	bilirubin	24.5107
4	I	9	bilirubin	14.6193
5	I	9	bilirubin	21.8656
6	I	9	bilirubin	32.8738
7	I	9	bilirubin	23.0722
8	I	9	bilirubin	37.3648
9	I	9	bilirubin	14.3339
10	I	9	bilirubin	13.5206
11	I	9	bilirubin	13.2588
12	I	9	bilirubin	34.8278
13	I	9	bilirubin	41.6441
14	UI	9	bilirubin	2.25908
15	UI	9	bilirubin	21.622
16	UI	9	bilirubin	10.9374
17	UI	9	bilirubin	7.21234
18	UI	9	bilirubin	3.28612
19	UI	9	bilirubin	-1.40817
20	UI	9	bilirubin	-1.12631
21	UI	9	bilirubin	12.2658
22	UI	9	bilirubin	0
23	UI	9	bilirubin	-0.780286
24	UI	9	bilirubin	14.8763
25	UI	9	bilirubin	5.47241

## Sheet: 2E
mouse	infected	dpi	variable	uM
1	I	9	tryptophan	72
2	I	9	tryptophan	55.3
3	I	9	tryptophan	46.3
4	I	9	tryptophan	64.4
5	I	9	tryptophan	53
6	I	9	tryptophan	39.6
7	I	9	tryptophan	54.7
8	I	9	tryptophan	43.3
9	UI	9	tryptophan	64.1
10	UI	9	tryptophan	75.4
11	UI	9	tryptophan	90.2
12	UI	9	tryptophan	80.5
13	UI	9	tryptophan	65.8
14	UI	9	tryptophan	76.8
15	UI	9	tryptophan	68.1
1	I	9	kynurenine	2.62
2	I	9	kynurenine	3.28
3	I	9	kynurenine	2.31
4	I	9	kynurenine	3.94
5	I	9	kynurenine	2.68
6	I	9	kynurenine	3.67
7	I	9	kynurenine	3.23
8	I	9	kynurenine	2.67
9	UI	9	kynurenine	0.709
10	UI	9	kynurenine	0.694
11	UI	9	kynurenine	0.963
12	UI	9	kynurenine	1.11
13	UI	9	kynurenine	1.17
14	UI	9	kynurenine	0.605
15	UI	9	kynurenine	0.911
1	I	9	3-hydroxy-kynurenine	0.089
2	I	9	3-hydroxy-kynurenine	0.129
3	I	9	3-hydroxy-kynurenine	0.094
4	I	9	3-hydroxy-kynurenine	0.128
5	I	9	3-hydroxy-kynurenine	0.088
6	I	9	3-hydroxy-kynurenine	0.079
7	I	9	3-hydroxy-kynurenine	0.078
8	I	9	3-hydroxy-kynurenine	0.101
9	UI	9	3-hydroxy-kynurenine	0.039
10	UI	9	3-hydroxy-kynurenine	0.038
11	UI	9	3-hydroxy-kynurenine	0.069
12	UI	9	3-hydroxy-kynurenine	0.058
13	UI	9	3-hydroxy-kynurenine	0.062
14	UI	9	3-hydroxy-kynurenine	0.035
15	UI	9	3-hydroxy-kynurenine	0.051
1	I	9	kynurenic acid	0.089
2	I	9	kynurenic acid	0.101
3	I	9	kynurenic acid	0.07
4	I	9	kynurenic acid	0.11
5	I	9	kynurenic acid	0.106
6	I	9	kynurenic acid	0.083
7	I	9	kynurenic acid	0.097
8	I	9	kynurenic acid	0.084
9	UI	9	kynurenic acid	0.069
10	UI	9	kynurenic acid	0.065
11	UI	9	kynurenic acid	0.145
12	UI	9	kynurenic acid	0.07
13	UI	9	kynurenic acid	0.08
14	UI	9	kynurenic acid	0.091
15	UI	9	kynurenic acid	0.143
1	I	9	quinolinic acid	0.198
2	I	9	quinolinic acid	0.265
3	I	9	quinolinic acid	0.341
4	I	9	quinolinic acid	0.405
5	I	9	quinolinic acid	0.257
6	I	9	quinolinic acid	0.573
7	I	9	quinolinic acid	0.437
8	I	9	quinolinic acid	0.462
9	UI	9	quinolinic acid	0.082
10	UI	9	quinolinic acid	0.128
11	UI	9	quinolinic acid	0.179
12	UI	9	quinolinic acid	0.152
13	UI	9	quinolinic acid	0.125
14	UI	9	quinolinic acid	0.115
15	UI	9	quinolinic acid	0.145
