# Supplementary material for: Metabolic profiling during malaria reveals the role of the aryl hydrocarbon receptor in regulating kidney injury
Source: eLife. 2020 Oct 6;9:e60165. doi: 10.7554/eLife.60165 (PMC7538157; doi:10.7554/eLife.60165)
Supplement: Figure 3—figure supplement 1—source data 1. [file elife-60165-fig3-figsupp1-data1.xlsx]

## Sheet: 3 supplement 1A-B
mouse	genotype	day	percent.parasitemia	parasite.density
1	Ahr+/+	0	0	0
1	Ahr+/+	4	0.0167866	NA
1	Ahr+/+	5	0.0411255	0.312965
1	Ahr+/+	6	0.157795	0.929411
1	Ahr+/+	7	0.362222	0.851041
1	Ahr+/+	8	0.341981	0.735943
1	Ahr+/+	9	0.0988764	0.0712404
1	Ahr+/+	10	NA	NA
1	Ahr+/+	11	NA	NA
1	Ahr+/+	12	NA	NA
1	Ahr+/+	13	NA	NA
1	Ahr+/+	14	NA	NA
1	Ahr+/+	15	NA	NA
3	Ahr+/+	0	0	0
3	Ahr+/+	4	0.0157658	NA
3	Ahr+/+	5	0.0513919	0.414064
3	Ahr+/+	6	0.195067	1.35484
3	Ahr+/+	7	0.157428	0.609482
3	Ahr+/+	8	0.315673	0.635766
3	Ahr+/+	9	0.15103	0.166284
3	Ahr+/+	10	0.047619	0.0559048
3	Ahr+/+	11	0.00650759	0.0139653
3	Ahr+/+	12	0.00454545	0.0165
3	Ahr+/+	13	0.00205339	0.00829055
3	Ahr+/+	14	0.0115207	0.047765
3	Ahr+/+	15	0.012024	0.0595551
7	Ahr+/+	0	0	0
7	Ahr+/+	4	0.00700935	NA
7	Ahr+/+	5	0.0172414	0.133267
7	Ahr+/+	6	0.0705394	0.514585
7	Ahr+/+	7	0.197248	1.07904
7	Ahr+/+	8	0.262055	0.806997
7	Ahr+/+	9	0.244851	0.554466
7	Ahr+/+	10	0.0425101	0.0693765
7	Ahr+/+	11	0	0
7	Ahr+/+	12	0.00223214	0.00846317
7	Ahr+/+	13	0.00232558	0.00958605
7	Ahr+/+	14	0.00613497	0.0191871
7	Ahr+/+	15	0.0119522	0.0511315
22	Ahr+/+	0	0	0
22	Ahr+/+	4	0	0
22	Ahr+/+	5	0.0132159	0.103407
22	Ahr+/+	6	0.0445434	0.301893
22	Ahr+/+	7	0.144165	0.949253
22	Ahr+/+	8	0.212996	0.945384
22	Ahr+/+	9	0.18559	0.383892
22	Ahr+/+	10	NA	NA
22	Ahr+/+	11	0.00442478	0.0128584
22	Ahr+/+	12	0	0
22	Ahr+/+	13	0	0
22	Ahr+/+	14	0.00234192	0.0129555
22	Ahr+/+	15	0.00209205	0.0117113
25	Ahr+/+	0	0	0
25	Ahr+/+	4	0.00449438	0.0345146
25	Ahr+/+	5	0.00873362	0.0715284
25	Ahr+/+	6	0.0965092	0.7216
25	Ahr+/+	7	0.264368	1.21451
25	Ahr+/+	8	0.259259	0.623
25	Ahr+/+	9	0.177033	0.233773
25	Ahr+/+	10	NA	NA
25	Ahr+/+	11	0.1	0.1495
25	Ahr+/+	12	0.0281996	0.0443015
25	Ahr+/+	13	0.00678733	0.0219265
25	Ahr+/+	14	0.00662252	0.0325066
25	Ahr+/+	15	0	0
26	Ahr+/+	0	0	0
26	Ahr+/+	4	0	0
26	Ahr+/+	5	0.010395	0.0774532
26	Ahr+/+	6	0.0617849	0.426841
26	Ahr+/+	7	0.160521	0.266464
26	Ahr+/+	8	0.223982	0.704087
26	Ahr+/+	9	0.189189	0.326257
26	Ahr+/+	10	NA	NA
26	Ahr+/+	11	0.0243408	0.076856
26	Ahr+/+	12	0.00438596	0.0162259
26	Ahr+/+	13	0.00234192	0.0112763
26	Ahr+/+	14	0.0183066	0.0966133
26	Ahr+/+	15	0.010917	0.0423799
30	Ahr+/+	0	0	0
30	Ahr+/+	4	0.00218341	0.0158417
30	Ahr+/+	5	0.0168776	0.116228
30	Ahr+/+	6	0.0589569	0.480381
30	Ahr+/+	7	0.196597	0.230117
30	Ahr+/+	8	0.264237	0.79892
30	Ahr+/+	9	0.212121	0.303333
30	Ahr+/+	10	NA	NA
30	Ahr+/+	11	0.010917	0.0304148
30	Ahr+/+	12	0.00215983	0.00857775
30	Ahr+/+	13	0.00632911	0.0262025
30	Ahr+/+	14	0.0152838	0.0675546
30	Ahr+/+	15	0.0197802	0.0734934
2	Ahr+/-	0	0	0
2	Ahr+/-	4	0.0147992	NA
2	Ahr+/-	5	0.0398126	0.330246
2	Ahr+/-	6	0.122318	0.953649
2	Ahr+/-	7	0.244009	1.25738
2	Ahr+/-	8	0.338673	0.970975
2	Ahr+/-	9	0.134066	0.219332
2	Ahr+/-	10	0.0385542	0.053494
2	Ahr+/-	11	0.00207469	0.00552282
2	Ahr+/-	12	0	0
2	Ahr+/-	13	0.00209205	0.0119027
2	Ahr+/-	14	0.00470588	0.0164753
2	Ahr+/-	15	0.00843882	0.0467637
4	Ahr+/-	0	0	0
4	Ahr+/-	4	0.00475059	NA
4	Ahr+/-	5	0.0175439	0.129904
4	Ahr+/-	6	0.0679825	0.519114
4	Ahr+/-	7	0.306034	1.53476
4	Ahr+/-	8	0.248945	0.825378
4	Ahr+/-	9	0.205508	0.487877
4	Ahr+/-	10	0.0689655	0.116241
4	Ahr+/-	11	0.0142566	0.037224
4	Ahr+/-	12	0.0174292	0.0571155
4	Ahr+/-	13	0.00804829	0.0391348
4	Ahr+/-	14	0.00813008	0.0344431
4	Ahr+/-	15	0.00845666	0.0322114
5	Ahr+/-	0	0	0
5	Ahr+/-	4	0	NA
5	Ahr+/-	5	0	0
5	Ahr+/-	6	0.0119617	0.090006
5	Ahr+/-	7	0.0706402	0.503453
5	Ahr+/-	8	0.176471	1.11591
5	Ahr+/-	9	0.225734	0.682844
5	Ahr+/-	10	0.173448	0.384533
5	Ahr+/-	11	0.0214592	0.0508691
5	Ahr+/-	12	0.01373	0.0401602
5	Ahr+/-	13	0.0116279	0.0398372
5	Ahr+/-	14	0.00913242	0.037137
5	Ahr+/-	15	0.010917	0.0492576
6	Ahr+/-	0	0	0
6	Ahr+/-	4	0.0044843	NA
6	Ahr+/-	5	0.0323232	0.24076
6	Ahr+/-	6	0.0958606	0.814623
6	Ahr+/-	7	0.185012	0.918676
6	Ahr+/-	8	0.274298	0.788607
6	Ahr+/-	9	0.133183	0.349339
6	Ahr+/-	10	0.0550459	0.11378
6	Ahr+/-	11	0.00612245	0.0183735
6	Ahr+/-	12	0.00218818	0.00980963
6	Ahr+/-	13	0.00428266	0.0188822
6	Ahr+/-	14	NA	NA
6	Ahr+/-	15	0	0
8	Ahr+/-	0	0	0
8	Ahr+/-	4	0.00462963	NA
8	Ahr+/-	5	0.0228216	0.194896
8	Ahr+/-	6	0.10177	0.777115
8	Ahr+/-	7	0.204494	0.9464
8	Ahr+/-	8	0.370968	0.996234
8	Ahr+/-	9	0.174713	0.239269
8	Ahr+/-	10	0.0423163	0.0422105
8	Ahr+/-	11	0.00472813	0.00907801
8	Ahr+/-	12	0.00437637	0.0148009
8	Ahr+/-	13	0.00222222	0.00817
8	Ahr+/-	14	0.00226757	0.00828118
8	Ahr+/-	15	0.0040404	0.0164364
9	Ahr+/-	0	0	0
9	Ahr+/-	4	0.00229358	NA
9	Ahr+/-	5	0.0151515	0.116841
9	Ahr+/-	6	0.0374707	0.315297
9	Ahr+/-	7	0.152125	0.948577
9	Ahr+/-	8	0.301397	0.940359
9	Ahr+/-	9	0.122222	0.341428
9	Ahr+/-	10	0.0134228	0.0230403
9	Ahr+/-	11	0.00215517	0.00642565
9	Ahr+/-	12	0.00625	0.0224656
9	Ahr+/-	13	0.00674157	0.0269663
9	Ahr+/-	14	0.00851064	0.0357191
9	Ahr+/-	15	0.0148936	0.067267
10	Ahr+/-	0	0	0
10	Ahr+/-	4	0	NA
10	Ahr+/-	5	0.0509554	0.374854
10	Ahr+/-	6	0.134615	1.05013
10	Ahr+/-	7	0.232346	0.919975
10	Ahr+/-	8	0.267108	0.914178
10	Ahr+/-	9	0.216704	0.302953
10	Ahr+/-	10	0.0794702	0.089404
10	Ahr+/-	11	0.00860215	0.0208043
10	Ahr+/-	12	0.00892857	0.029808
10	Ahr+/-	13	0.0111359	0.0537528
10	Ahr+/-	14	0.0147992	0.0439017
10	Ahr+/-	15	0.00211864	0.00680297
21	Ahr+/-	0	0	0
21	Ahr+/-	4	0.00234742	0.0168134
21	Ahr+/-	5	0.0157658	0.136169
21	Ahr+/-	6	0.0632653	0.482778
21	Ahr+/-	7	0.163776	0.67091
21	Ahr+/-	8	NA	NA
21	Ahr+/-	9	0.189362	0.353633
21	Ahr+/-	10	NA	NA
21	Ahr+/-	11	0.0166667	0.040775
21	Ahr+/-	12	0.0021097	0.00853481
21	Ahr+/-	13	0.002079	0.00943971
21	Ahr+/-	14	0.0130719	0.0600784
21	Ahr+/-	15	0.00913242	0.0380411
23	Ahr+/-	0	0	0
23	Ahr+/-	4	0.00420168	0.0292122
23	Ahr+/-	5	0.0197368	0.160283
23	Ahr+/-	6	0.0986547	0.726099
23	Ahr+/-	7	0.252408	1.43494
23	Ahr+/-	8	0.322581	0.814355
23	Ahr+/-	9	0.114754	0.166279
23	Ahr+/-	10	NA	NA
23	Ahr+/-	11	0.00453515	0.0112063
23	Ahr+/-	12	0.00816327	0.0330286
23	Ahr+/-	13	0	0
23	Ahr+/-	14	0.0204499	0.11138
23	Ahr+/-	15	0.00934579	0.0432336
24	Ahr+/-	0	0	0
24	Ahr+/-	4	0	0
24	Ahr+/-	5	0.00894855	0.0695884
24	Ahr+/-	6	0.0125261	0.0979666
24	Ahr+/-	7	0.121019	0.83951
24	Ahr+/-	8	0.196078	1.21706
24	Ahr+/-	9	0.277027	0.734537
24	Ahr+/-	10	NA	NA
24	Ahr+/-	11	0.0629213	0.106274
24	Ahr+/-	12	0.0185567	0.0537866
24	Ahr+/-	13	0.00429185	0.0168326
24	Ahr+/-	14	0.00458716	0.0199266
24	Ahr+/-	15	0.00214592	0.0103906
28	Ahr+/-	0	0	0
28	Ahr+/-	4	0	0
28	Ahr+/-	5	0.0159817	0.116371
28	Ahr+/-	6	0.0799087	0.593921
28	Ahr+/-	7	0.176856	0.179862
28	Ahr+/-	8	0.191617	0.618251
28	Ahr+/-	9	0.174713	0.430579
28	Ahr+/-	10	NA	NA
28	Ahr+/-	11	0.00437637	0.0127133
28	Ahr+/-	12	0	0
28	Ahr+/-	13	0	0
28	Ahr+/-	14	0.00225734	0.0126885
28	Ahr+/-	15	0	0
31	Ahr+/-	0	0	0
31	Ahr+/-	4	0	0
31	Ahr+/-	5	0.0139442	0.0912301
31	Ahr+/-	6	0.0364372	0.292409
31	Ahr+/-	7	0.12931	0.753362
31	Ahr+/-	8	0.176909	0.659427
31	Ahr+/-	9	0.222467	0.520239
31	Ahr+/-	10	NA	NA
31	Ahr+/-	11	0.0465632	0.112078
31	Ahr+/-	12	0.0175781	0.0585439
31	Ahr+/-	13	0.00888889	0.03348
31	Ahr+/-	14	0.012766	0.0687191
31	Ahr+/-	15	0.0169492	0.0869831
32	Ahr+/-	0	0	0
32	Ahr+/-	4	0.00451467	0.0308668
32	Ahr+/-	5	0	0
32	Ahr+/-	6	0.025	0.152613
32	Ahr+/-	7	0.072093	0.55061
32	Ahr+/-	8	0.192982	0.949763
32	Ahr+/-	9	0.243619	0.728544
32	Ahr+/-	10	NA	NA
32	Ahr+/-	11	0.111349	0.277872
32	Ahr+/-	12	0.0226757	0.0671882
32	Ahr+/-	13	0.021097	0.0964241
32	Ahr+/-	14	0.0358852	0.17494
32	Ahr+/-	15	0.0227273	0.0782273
34	Ahr+/-	0	0	0
34	Ahr+/-	4	0	0
34	Ahr+/-	5	0.00616016	0.0474148
34	Ahr+/-	6	0.0414079	0.367805
34	Ahr+/-	7	0.181818	1.28782
34	Ahr+/-	8	NA	NA
34	Ahr+/-	9	0.161148	0.39022
34	Ahr+/-	10	NA	NA
34	Ahr+/-	11	0.0283843	0.0708046
34	Ahr+/-	12	0.0158014	0.0524289
34	Ahr+/-	13	0.00223214	0.0105257
34	Ahr+/-	14	0.00226757	0.0108946
34	Ahr+/-	15	0.00934579	0.0511776
50	Ahr+/-	0	0	0
50	Ahr+/-	4	0.002331	0.0202075
50	Ahr+/-	5	0.0241228	0.150985
50	Ahr+/-	6	0.0795455	0.627176
50	Ahr+/-	7	0.183406	0.989201
50	Ahr+/-	8	0.191379	0.866374
50	Ahr+/-	9	0.210989	0.423349
50	Ahr+/-	10	0.0983982	0.197141
50	Ahr+/-	11	0.0428266	0.104218
50	Ahr+/-	12	0.00224215	0.00984081
50	Ahr+/-	13	0.00663717	0.030833
50	Ahr+/-	14	0.0021322	0.00904691
50	Ahr+/-	15	0.00443459	0.0137672
52	Ahr+/-	0	0	0
52	Ahr+/-	4	0.00643777	0.0494936
52	Ahr+/-	5	0.00856531	0.0731563
52	Ahr+/-	6	0.0579065	0.384528
52	Ahr+/-	7	0.134091	0.743199
52	Ahr+/-	8	0.239437	0.97762
52	Ahr+/-	9	0.17619	0.349914
52	Ahr+/-	10	0.108352	0.162474
52	Ahr+/-	11	0.0406321	0.0950993
52	Ahr+/-	12	0.00665188	0.0277217
52	Ahr+/-	13	0.00220751	0.00977704
52	Ahr+/-	14	0.00393701	0.0155492
52	Ahr+/-	15	0	0
53	Ahr+/-	0	0	0
53	Ahr+/-	4	0.00230415	0.0200922
53	Ahr+/-	5	0.0321285	0.250345
53	Ahr+/-	6	0.127349	0.919967
53	Ahr+/-	7	0.26096	0.897443
53	Ahr+/-	8	0.311659	0.752969
53	Ahr+/-	9	0.220751	0.301987
53	Ahr+/-	10	0.0776471	0.0846353
53	Ahr+/-	11	0.0212766	0.0356064
53	Ahr+/-	12	0.004329	0.0162489
53	Ahr+/-	13	0.00894855	0.0393736
53	Ahr+/-	14	0.00610998	0.0249898
53	Ahr+/-	15	0.0158371	0.0387692
58	Ahr+/-	0	0	0
58	Ahr+/-	4	0.00688073	0.0611147
58	Ahr+/-	5	0.0334076	0.237962
58	Ahr+/-	6	0.0732673	0.606983
58	Ahr+/-	7	0.184382	0.883373
58	Ahr+/-	8	0.299107	1.18357
58	Ahr+/-	9	0.202797	0.501315
58	Ahr+/-	10	0.0655391	0.0943763
58	Ahr+/-	11	0.021978	0.0522088
58	Ahr+/-	12	0.00195312	0.00731152
58	Ahr+/-	13	0.00226757	0.00440363
58	Ahr+/-	14	0	0
58	Ahr+/-	15	0.0107991	0.0630616
60	Ahr+/-	0	0	0
60	Ahr+/-	4	0.007109	0.0558199
60	Ahr+/-	5	0.0125523	0.0905209
60	Ahr+/-	6	0.1	0.6756
60	Ahr+/-	7	0.142857	0.720214
60	Ahr+/-	8	0.224696	0.867553
60	Ahr+/-	9	0.183544	0.39719
60	Ahr+/-	10	0.116972	0.173763
60	Ahr+/-	11	0.0355556	0.0887822
60	Ahr+/-	12	0.00454545	0.0156091
60	Ahr+/-	13	0.00220264	0.00465198
60	Ahr+/-	14	0.0103093	0.0166546
60	Ahr+/-	15	0.00668151	0.0314031
27	Ahr-/-	0	0	0
27	Ahr-/-	4	0.00678733	0.0464525
27	Ahr-/-	5	0.0289855	0.225174
27	Ahr-/-	6	0.121896	0.722905
27	Ahr-/-	7	0.309259	0.466672
27	Ahr-/-	8	0.391204	0.445972
27	Ahr-/-	9	0.1566	0.159575
27	Ahr-/-	10	NA	NA
27	Ahr-/-	11	0.0137931	0.0264
27	Ahr-/-	12	0.00236407	0.00893262
27	Ahr-/-	13	0	0
27	Ahr-/-	14	0.00911162	0.030697
27	Ahr-/-	15	0.00668151	0.0279688
29	Ahr-/-	0	0	0
29	Ahr-/-	4	0.0043956	0.0326527
29	Ahr-/-	5	0.0547945	0.414274
29	Ahr-/-	6	0.169978	1.20982
29	Ahr-/-	7	0.318271	0.432849
29	Ahr-/-	8	0.224242	0.409803
29	Ahr-/-	9	0.0821053	0.103124
29	Ahr-/-	10	NA	NA
29	Ahr-/-	11	0.0146138	0.0531576
29	Ahr-/-	12	0.00683371	0.0370866
29	Ahr-/-	13	0.023166	0.112772
29	Ahr-/-	14	0.00884956	0.0334381
29	Ahr-/-	15	0.0159091	0.0636284
33	Ahr-/-	0	0	0
33	Ahr-/-	4	0.00230415	0.0187258
33	Ahr-/-	5	0.0555556	0.387389
33	Ahr-/-	6	0.222222	1.35744
33	Ahr-/-	7	0.374449	1.16697
33	Ahr-/-	8	0.401392	0.396977
33	Ahr-/-	9	0.374118	0.294244
33	Ahr-/-	10	NA	NA
33	Ahr-/-	11	NA	NA
33	Ahr-/-	12	NA	NA
33	Ahr-/-	13	NA	NA
33	Ahr-/-	14	NA	NA
33	Ahr-/-	15	NA	NA
51	Ahr-/-	0	0	0
51	Ahr-/-	4	0.00902935	0.0815937
51	Ahr-/-	5	0.0124481	0.0913568
51	Ahr-/-	6	0.110417	0.809078
51	Ahr-/-	7	0.297052	1.37223
51	Ahr-/-	8	0.329596	0.878704
51	Ahr-/-	9	0.122685	0.126856
51	Ahr-/-	10	0.160271	0.182869
51	Ahr-/-	11	NA	NA
51	Ahr-/-	12	NA	NA
51	Ahr-/-	13	NA	NA
51	Ahr-/-	14	NA	NA
51	Ahr-/-	15	NA	NA
54	Ahr-/-	0	0	0
54	Ahr-/-	4	0.00657895	0.0609441
54	Ahr-/-	5	0.0642398	0.396552
54	Ahr-/-	6	0.205752	1.34973
54	Ahr-/-	7	0.355556	0.500089
54	Ahr-/-	8	0.259259	0.357259
54	Ahr-/-	9	0.0651163	0.0725721
54	Ahr-/-	10	0.0357143	0.050625
54	Ahr-/-	11	NA	NA
54	Ahr-/-	12	NA	NA
54	Ahr-/-	13	NA	NA
54	Ahr-/-	14	NA	NA
54	Ahr-/-	15	NA	NA
55	Ahr-/-	0	0	0
55	Ahr-/-	4	0.0169492	0.142051
55	Ahr-/-	5	0.0684411	0.55776
55	Ahr-/-	6	0.221973	1.44105
55	Ahr-/-	7	0.403101	1.10047
55	Ahr-/-	8	0.383178	0.522079
55	Ahr-/-	9	0.062212	0.048712
55	Ahr-/-	10	0.0526316	0.0455526
55	Ahr-/-	11	0.00900901	0.0112117
55	Ahr-/-	12	0.0043573	0.014305
55	Ahr-/-	13	0	0
55	Ahr-/-	14	0	0
55	Ahr-/-	15	0	0
57	Ahr-/-	0	0	0
57	Ahr-/-	4	0.0221774	0.179504
57	Ahr-/-	5	0.100446	0.749531
57	Ahr-/-	6	0.232019	1.19095
57	Ahr-/-	7	0.3878	0.718011
57	Ahr-/-	8	0.123047	0.153501
57	Ahr-/-	9	0.0509259	0.0473102
57	Ahr-/-	10	0.00707547	0.00889033
57	Ahr-/-	11	0.017284	0.0391049
57	Ahr-/-	12	0.00457666	0.0212403
57	Ahr-/-	13	0.00437637	0.00830853
57	Ahr-/-	14	0.00226244	0.00376018
57	Ahr-/-	15	0.00234192	0.0112319
59	Ahr-/-	0	0	0
59	Ahr-/-	4	0.00434783	0.0324826
59	Ahr-/-	5	0.0296443	0.196171
59	Ahr-/-	6	0.180617	1.37124
59	Ahr-/-	7	0.232967	1.11801
59	Ahr-/-	8	0.440265	1.36835
59	Ahr-/-	9	0.121622	0.1485
59	Ahr-/-	10	0.044843	0.0386996
59	Ahr-/-	11	NA	NA
59	Ahr-/-	12	NA	NA
59	Ahr-/-	13	NA	NA
59	Ahr-/-	14	NA	NA
59	Ahr-/-	15	NA	NA
61	Ahr-/-	0	0	0
61	Ahr-/-	4	0.00217391	0.015138
61	Ahr-/-	5	0.0578512	0.348698
61	Ahr-/-	6	0.0726916	0.450179
61	Ahr-/-	7	0.364929	0.953194
61	Ahr-/-	8	0.279279	0.245905
61	Ahr-/-	9	0.220183	0.195963
61	Ahr-/-	10	0.0226244	0.0172285
61	Ahr-/-	11	NA	NA
61	Ahr-/-	12	NA	NA
61	Ahr-/-	13	NA	NA
61	Ahr-/-	14	NA	NA
61	Ahr-/-	15	NA	NA

## Sheet: 3 supplement 1C
mouse	genotype	infected	time	status (1 = dead)
1	Ahr+/+	infected	10	1
3	Ahr+/+	infected	15	0
7	Ahr+/+	infected	15	0
22	Ahr+/+	infected	15	0
25	Ahr+/+	infected	15	0
26	Ahr+/+	infected	15	0
30	Ahr+/+	infected	15	0
2	Ahr+/-	infected	15	0
4	Ahr+/-	infected	15	0
5	Ahr+/-	infected	15	0
6	Ahr+/-	infected	15	0
8	Ahr+/-	infected	15	0
9	Ahr+/-	infected	15	0
10	Ahr+/-	infected	15	0
21	Ahr+/-	infected	15	0
23	Ahr+/-	infected	15	0
24	Ahr+/-	infected	15	0
28	Ahr+/-	infected	15	0
31	Ahr+/-	infected	15	0
32	Ahr+/-	infected	15	0
34	Ahr+/-	infected	15	0
50	Ahr+/-	infected	15	0
52	Ahr+/-	infected	15	0
53	Ahr+/-	infected	15	0
56	Ahr+/-	infected	15	0
58	Ahr+/-	infected	15	0
60	Ahr+/-	infected	15	0
27	Ahr-/-	infected	15	0
29	Ahr-/-	infected	15	0
33	Ahr-/-	infected	10	1
51	Ahr-/-	infected	11	1
54	Ahr-/-	infected	15	0
55	Ahr-/-	infected	15	0
57	Ahr-/-	infected	15	0
59	Ahr-/-	infected	11	1
61	Ahr-/-	infected	11	1
