# Supplementary material for: Metabolic profiling during malaria reveals the role of the aryl hydrocarbon receptor in regulating kidney injury
Source: eLife. 2020 Oct 6;9:e60165. doi: 10.7554/eLife.60165 (PMC7538157; doi:10.7554/eLife.60165)
Supplement: Figure 3—figure supplement 2—source data 1. [file elife-60165-fig3-figsupp2-data1.xlsx]

## Sheet: 3 supplement 2A
number	genotype	infected	variable	uM
37	Ido1-/-	I	tryptophan	55.8
38	Ido1-/-	I	tryptophan	61.8
39	Ido1-/-	I	tryptophan	45.1
40	Ido1-/-	I	tryptophan	39.1
41	Ido1-/-	I	tryptophan	44.1
42	Ido1+/+	I	tryptophan	43.1
43	Ido1+/+	I	tryptophan	39
44	Ido1+/+	I	tryptophan	55.9
45	Ido1+/+	I	tryptophan	40.7
46	Ido1+/+	UI	tryptophan	75
47	Ido1+/+	UI	tryptophan	82.7
48	Ido1+/+	UI	tryptophan	70.5
49	Ido1+/+	UI	tryptophan	74.2
50	Ido1+/+	UI	tryptophan	78.7
51	Ido1-/-	UI	tryptophan	51.8
52	Ido1-/-	UI	tryptophan	69.4
53	Ido1-/-	UI	tryptophan	90.4
54	Ido1-/-	UI	tryptophan	59.3
55	Ido1-/-	UI	tryptophan	73.9
37	Ido1-/-	I	kynurenine	0.296
38	Ido1-/-	I	kynurenine	0.643
39	Ido1-/-	I	kynurenine	0.726
40	Ido1-/-	I	kynurenine	0.377
41	Ido1-/-	I	kynurenine	0.971
42	Ido1+/+	I	kynurenine	4.52
43	Ido1+/+	I	kynurenine	4.09
44	Ido1+/+	I	kynurenine	3.19
45	Ido1+/+	I	kynurenine	2.18
46	Ido1+/+	UI	kynurenine	0.644
47	Ido1+/+	UI	kynurenine	0.523
48	Ido1+/+	UI	kynurenine	0.566
49	Ido1+/+	UI	kynurenine	0.505
50	Ido1+/+	UI	kynurenine	0.504
51	Ido1-/-	UI	kynurenine	0.135
52	Ido1-/-	UI	kynurenine	0.195
53	Ido1-/-	UI	kynurenine	0.199
54	Ido1-/-	UI	kynurenine	0.132
55	Ido1-/-	UI	kynurenine	0.169
37	Ido1-/-	I	3-hydroxy- kynurenine	0.039
38	Ido1-/-	I	3-hydroxy- kynurenine	0.049
39	Ido1-/-	I	3-hydroxy- kynurenine	0.056
40	Ido1-/-	I	3-hydroxy- kynurenine	0.046
41	Ido1-/-	I	3-hydroxy- kynurenine	0.076
42	Ido1+/+	I	3-hydroxy- kynurenine	0.24
43	Ido1+/+	I	3-hydroxy- kynurenine	0.233
44	Ido1+/+	I	3-hydroxy- kynurenine	0.13
45	Ido1+/+	I	3-hydroxy- kynurenine	0.147
46	Ido1+/+	UI	3-hydroxy- kynurenine	0.048
47	Ido1+/+	UI	3-hydroxy- kynurenine	0.042
48	Ido1+/+	UI	3-hydroxy- kynurenine	0.031
49	Ido1+/+	UI	3-hydroxy- kynurenine	0.039
50	Ido1+/+	UI	3-hydroxy- kynurenine	0.046
51	Ido1-/-	UI	3-hydroxy- kynurenine	0.016
52	Ido1-/-	UI	3-hydroxy- kynurenine	0.024
53	Ido1-/-	UI	3-hydroxy- kynurenine	0.025
54	Ido1-/-	UI	3-hydroxy- kynurenine	0.017
55	Ido1-/-	UI	3-hydroxy- kynurenine	0.028
37	Ido1-/-	I	kynurenic acid	0.028
38	Ido1-/-	I	kynurenic acid	0.115
39	Ido1-/-	I	kynurenic acid	0.051
40	Ido1-/-	I	kynurenic acid	0.029
41	Ido1-/-	I	kynurenic acid	0.042
42	Ido1+/+	I	kynurenic acid	0.064
43	Ido1+/+	I	kynurenic acid	0.076
44	Ido1+/+	I	kynurenic acid	0.08
45	Ido1+/+	I	kynurenic acid	0.037
46	Ido1+/+	UI	kynurenic acid	0.106
47	Ido1+/+	UI	kynurenic acid	0.056
48	Ido1+/+	UI	kynurenic acid	0.048
49	Ido1+/+	UI	kynurenic acid	0.066
50	Ido1+/+	UI	kynurenic acid	0.05
51	Ido1-/-	UI	kynurenic acid	0.042
52	Ido1-/-	UI	kynurenic acid	0.058
53	Ido1-/-	UI	kynurenic acid	0.042
54	Ido1-/-	UI	kynurenic acid	0.032
55	Ido1-/-	UI	kynurenic acid	0.031
37	Ido1-/-	I	quinolinic acid	0.132
38	Ido1-/-	I	quinolinic acid	0.148
39	Ido1-/-	I	quinolinic acid	0.297
40	Ido1-/-	I	quinolinic acid	0.163
41	Ido1-/-	I	quinolinic acid	0.421
42	Ido1+/+	I	quinolinic acid	0.607
43	Ido1+/+	I	quinolinic acid	0.606
44	Ido1+/+	I	quinolinic acid	0.235
45	Ido1+/+	I	quinolinic acid	0.367
46	Ido1+/+	UI	quinolinic acid	0.184
47	Ido1+/+	UI	quinolinic acid	0.184
48	Ido1+/+	UI	quinolinic acid	0.12
49	Ido1+/+	UI	quinolinic acid	0.135
50	Ido1+/+	UI	quinolinic acid	0.087
51	Ido1-/-	UI	quinolinic acid	0.085
52	Ido1-/-	UI	quinolinic acid	0.075
53	Ido1-/-	UI	quinolinic acid	0.08
54	Ido1-/-	UI	quinolinic acid	0.106
55	Ido1-/-	UI	quinolinic acid	0.083

## Sheet: 3 supplement 2B-C
mouse	genotype	day	percent.parasitemia	parasite.density
26	IDO1-/-	0	0	0
27	IDO1-/-	0	0	0
28	IDO1-/-	0	0	0
30	IDO1-/-	0	0	0
31	IDO1-/-	0	0	0
32	IDO1-/-	0	0	0
34	IDO1-/-	0	0	0
35	IDO1-/-	0	0	0
36	IDO1-/-	0	0	0
37	IDO1-/-	0	0	0
39	IDO1-/-	0	0	0
40	IDO1-/-	0	0	0
41	IDO1-/-	0	0	0
45	IDO1+/+	0	0	0
46	IDO1+/+	0	0	0
47	IDO1+/+	0	0	0
50	IDO1+/+	0	0	0
51	IDO1+/+	0	0	0
52	IDO1+/+	0	0	0
54	IDO1+/+	0	0	0
55	IDO1+/+	0	0	0
56	IDO1+/+	0	0	0
58	IDO1+/+	0	0	0
59	IDO1+/+	0	0	0
60	IDO1+/+	0	0	0
26	IDO1-/-	5	0.0188285	0.144706
27	IDO1-/-	5	0.0541667	0.425344
28	IDO1-/-	5	0.0273438	0.194592
30	IDO1-/-	5	0.033557	0.265369
31	IDO1-/-	5	0.0193966	0.132721
32	IDO1-/-	5	0.04375	0.294262
34	IDO1-/-	5	0.0174757	0.126795
35	IDO1-/-	5	0.0107759	0.0768696
36	IDO1-/-	5	0.0253411	0.18608
37	IDO1-/-	5	0.092827	0.653781
39	IDO1-/-	5	0.0144033	0.101831
40	IDO1-/-	5	0.0257511	0.186206
41	IDO1-/-	5	0.012766	0.0931851
45	IDO1+/+	5	0.0366599	0.279953
46	IDO1+/+	5	0.0742459	0.524399
47	IDO1+/+	5	0.0198675	0.142709
50	IDO1+/+	5	0.0677618	0.504521
51	IDO1+/+	5	0.0240741	0.190462
52	IDO1+/+	5	0.0264317	0.206392
54	IDO1+/+	5	0.0420168	0.296765
55	IDO1+/+	5	0.00767754	0.0542572
56	IDO1+/+	5	0.0604651	0.398767
58	IDO1+/+	5	0.00465116	0.0358349
59	IDO1+/+	5	0.025	0.181025
60	IDO1+/+	5	0.0184049	0.143347
26	IDO1-/-	6	0.0656455	0.388063
27	IDO1-/-	6	0.136659	0.678651
28	IDO1-/-	6	0.0612245	0.415224
30	IDO1-/-	6	0.100642	0.689099
31	IDO1-/-	6	0.116279	0.616744
32	IDO1-/-	6	0.162933	1.05026
34	IDO1-/-	6	0.0966057	0.72918
35	IDO1-/-	6	0.0359712	0.230126
36	IDO1-/-	6	0.0751566	0.447294
37	IDO1-/-	6	0.24105	1.13607
39	IDO1-/-	6	0.0759754	0.483355
40	IDO1-/-	6	NA	NA
41	IDO1-/-	6	0.0205479	0.139983
45	IDO1+/+	6	0.174194	0.793277
46	IDO1+/+	6	0.170787	0.941717
47	IDO1+/+	6	0.110417	0.711083
50	IDO1+/+	6	0.202151	0.95597
51	IDO1+/+	6	0.0703625	0.475861
52	IDO1+/+	6	0.0596421	0.382783
54	IDO1+/+	6	0.119097	0.696774
55	IDO1+/+	6	0.0662252	0.450795
56	IDO1+/+	6	0.17161	0.898379
58	IDO1+/+	6	0.0287611	0.210128
59	IDO1+/+	6	0.0837104	0.614434
60	IDO1+/+	6	0.0764331	0.561401
26	IDO1-/-	7	0.125891	0.635559
27	IDO1-/-	7	0.220297	0.805626
28	IDO1-/-	7	0.139785	0.631269
30	IDO1-/-	7	0.183771	0.813829
31	IDO1-/-	7	0.229426	0.695277
32	IDO1-/-	7	0.293333	1.13461
34	IDO1-/-	7	0.186722	0.804025
35	IDO1-/-	7	0.133803	0.577894
36	IDO1-/-	7	0.175439	0.730965
37	IDO1-/-	7	0.338673	0.478375
39	IDO1-/-	7	0.216216	0.887676
40	IDO1-/-	7	0.210066	0.711387
41	IDO1-/-	7	0.13615	0.738207
45	IDO1+/+	7	0.39821	1.86263
46	IDO1+/+	7	0.366505	0.750235
47	IDO1+/+	7	0.237251	1.04983
50	IDO1+/+	7	0.325416	0.637815
51	IDO1+/+	7	0.198565	0.849261
52	IDO1+/+	7	0.159898	0.681967
54	IDO1+/+	7	0.281996	0.875879
55	IDO1+/+	7	0.125	0.59375
56	IDO1+/+	7	0.287257	0.862633
58	IDO1+/+	7	0.112766	0.673495
59	IDO1+/+	7	0.174274	0.861959
60	IDO1+/+	7	0.130542	0.681559
26	IDO1-/-	8	0.20438	0.553664
27	IDO1-/-	8	0.231707	0.572085
28	IDO1-/-	8	0.235294	0.691647
30	IDO1-/-	8	0.261574	0.603582
31	IDO1-/-	8	0.248756	0.465672
32	IDO1-/-	8	0.217722	0.388089
34	IDO1-/-	8	0.229117	0.574053
35	IDO1-/-	8	0.189573	0.587204
36	IDO1-/-	8	0.280597	0.890896
37	IDO1-/-	8	0.224824	0.294407
39	IDO1-/-	8	0.308696	0.695183
40	IDO1-/-	8	0.360489	0.713047
41	IDO1-/-	8	0.232506	0.704608
45	IDO1+/+	8	0.219941	0.22456
46	IDO1+/+	8	0.120773	0.125121
47	IDO1+/+	8	0.187013	0.446681
50	IDO1+/+	8	0.140845	0.146831
51	IDO1+/+	8	0.272265	0.532822
52	IDO1+/+	8	0.25977	0.577729
54	IDO1+/+	8	0.23822	0.46167
55	IDO1+/+	8	0.236074	0.692052
56	IDO1+/+	8	0.291411	0.466403
58	IDO1+/+	8	0.179625	0.593749
59	IDO1+/+	8	0.250501	0.633517
60	IDO1+/+	8	0.240786	0.699966
26	IDO1-/-	9	0.245238	0.549456
27	IDO1-/-	9	0.0769231	0.127154
28	IDO1-/-	9	0.0831234	0.190893
30	IDO1-/-	9	0.119565	0.228071
31	IDO1-/-	9	0.107692	0.158954
32	IDO1-/-	9	0.108939	0.132796
34	IDO1-/-	9	0.187683	0.237607
35	IDO1-/-	9	0.137931	0.291172
36	IDO1-/-	9	0.0983213	0.161837
37	IDO1-/-	9	0.0477454	0.0462414
39	IDO1-/-	9	0.175	0.262763
40	IDO1-/-	9	0.144828	0.160179
41	IDO1-/-	9	0.129477	0.232799
45	IDO1+/+	9	0.153846	0.117154
46	IDO1+/+	9	0.0389972	0.0452173
47	IDO1+/+	9	0.0229885	0.0392874
50	IDO1+/+	9	0.0555556	0.0530833
51	IDO1+/+	9	0.129944	0.20687
52	IDO1+/+	9	0.187032	0.246135
54	IDO1+/+	9	0.0305085	0.0302034
55	IDO1+/+	9	0.192208	0.461779
56	IDO1+/+	9	0.025641	0.0291538
58	IDO1+/+	9	0.139918	0.467395
59	IDO1+/+	9	0.162011	0.28036
60	IDO1+/+	9	0.160237	0.322478
26	IDO1-/-	11	0.0207715	0.0458843
27	IDO1-/-	11	0.0028169	0.0094493
28	IDO1-/-	11	0.00233645	0.00823598
30	IDO1-/-	11	0.00954654	0.0182625
31	IDO1-/-	11	0.00793651	0.0132817
32	IDO1-/-	11	0.00265252	0.00591645
34	IDO1-/-	11	0.00775194	0.0187519
35	IDO1-/-	11	0.00692841	0.0227252
36	IDO1-/-	11	0.0102564	0.0304769
37	IDO1-/-	11	0.00253165	0.00682405
39	IDO1-/-	11	0.00277008	0.00728116
40	IDO1-/-	11	0.00828729	0.0192141
41	IDO1-/-	11	0	0
45	IDO1+/+	11	NA	NA
46	IDO1+/+	11	0	0
47	IDO1+/+	11	0	0
50	IDO1+/+	11	0.0100251	0.03201
51	IDO1+/+	11	0	0
52	IDO1+/+	11	0.0170316	0.0461387
54	IDO1+/+	11	0.00852878	0.024968
55	IDO1+/+	11	0.002331	0.00625408
56	IDO1+/+	11	0	0
58	IDO1+/+	11	0.0189474	0.0624695
59	IDO1+/+	11	0.0152284	0.0272893
60	IDO1+/+	11	0.00707547	0.0212901
26	IDO1-/-	13	0.0137931	0.0721931
27	IDO1-/-	13	0.00686499	0.0266156
28	IDO1-/-	13	0.00225225	0.010339
30	IDO1-/-	13	0.00431965	0.0192441
31	IDO1-/-	13	0.00205761	0.00967284
32	IDO1-/-	13	0.00219298	0.0108136
34	IDO1-/-	13	0	0
35	IDO1-/-	13	0.00653595	0.0259085
36	IDO1-/-	13	0.0045977	0.0176437
37	IDO1-/-	13	0.00433839	0.0183753
39	IDO1-/-	13	0.012605	0.055708
40	IDO1-/-	13	0.00930233	0.0390512
41	IDO1-/-	13	0.0211268	0.109342
45	IDO1+/+	13	NA	NA
46	IDO1+/+	13	0.0114679	0.0470413
47	IDO1+/+	13	0.00446429	0.0211473
50	IDO1+/+	13	0.0230947	0.0717783
51	IDO1+/+	13	0.0189873	0.0719715
52	IDO1+/+	13	0.00863931	0.0401641
54	IDO1+/+	13	0.014862	0.0543652
55	IDO1+/+	13	0.0022779	0.0108667
56	IDO1+/+	13	0.00665188	0.0311641
58	IDO1+/+	13	0.0045045	0.0203806
59	IDO1+/+	13	0	0
60	IDO1+/+	13	0.00217391	0.0102359
26	IDO1-/-	15	0.0102669	0.0431211
27	IDO1-/-	15	0.00217391	0.00960109
28	IDO1-/-	15	0.0110619	0.0439657
30	IDO1-/-	15	0	0
31	IDO1-/-	15	0.00238095	0.0110083
32	IDO1-/-	15	0.0207852	0.131965
34	IDO1-/-	15	0.0202247	0.107151
35	IDO1-/-	15	0.00456621	0.0195137
36	IDO1-/-	15	0.00704225	0.0361338
37	IDO1-/-	15	0.00877193	0.0522851
39	IDO1-/-	15	0.00204082	0.0102939
40	IDO1-/-	15	0.00988142	0.0445949
41	IDO1-/-	15	0.0110619	0.0402102
45	IDO1+/+	15	NA	NA
46	IDO1+/+	15	0.0496894	0.231752
47	IDO1+/+	15	0.027088	0.208889
50	IDO1+/+	15	0.0147679	0.0808175
51	IDO1+/+	15	0.00451467	0.0208239
52	IDO1+/+	15	0.0179775	0.118652
54	IDO1+/+	15	0.016092	0.0968977
55	IDO1+/+	15	0	0
56	IDO1+/+	15	0.0162037	0.0780046
58	IDO1+/+	15	0	0
59	IDO1+/+	15	0	0
60	IDO1+/+	15	0.0226337	0.114481

## Sheet: 3 supplemet 2D
mouse	genotype	time	status (1 = dead)
26	Ido1-/-	15	0
27	Ido1-/-	15	0
28	Ido1-/-	15	0
30	Ido1-/-	15	0
31	Ido1-/-	15	0
32	Ido1-/-	15	0
34	Ido1-/-	15	0
35	Ido1-/-	15	0
36	Ido1-/-	15	0
37	Ido1-/-	15	0
40	Ido1-/-	15	0
41	Ido1-/-	15	0
45	Ido1+/+	10	1
46	Ido1+/+	15	0
47	Ido1+/+	15	0
50	Ido1+/+	15	0
51	Ido1+/+	15	0
52	Ido1+/+	15	0
54	Ido1+/+	15	0
55	Ido1+/+	15	0
56	Ido1+/+	15	0
58	Ido1+/+	15	0
59	Ido1+/+	15	0
60	Ido1+/+	15	0
