# Supplementary material for: Metabolic profiling during malaria reveals the role of the aryl hydrocarbon receptor in regulating kidney injury
Source: eLife. 2020 Oct 6;9:e60165. doi: 10.7554/eLife.60165 (PMC7538157; doi:10.7554/eLife.60165)
Supplement: Figure 3—source data 1. [file elife-60165-fig3-data1.xlsx]

## Sheet: 3A-E
mouse	genotype	day	temp (deg C)	change in temp from d0	weight (g)	change in weight from d0	10^6 RBCs/ul blood	percent parasitemia	parasite density
1	Ahr-/-	0	37.7	0	16	100	6.9795	0	0
1	Ahr-/-	4	NA	NA	NA	NA	NA	0.0113636	NA
1	Ahr-/-	5	38.1	0.4	17.4	108.75	7.06	0.106996	0.755391
1	Ahr-/-	6	38.3	0.6	16.7	104.375	5.8865	0.252016	1.48349
1	Ahr-/-	7	36.3	-1.4	15.5	96.875	2.435	0.419501	1.02149
1	Ahr-/-	8	28.5	-9.2	13.3	83.125	0.983	0.311966	0.306662
1	Ahr-/-	9	28.2	-9.5	12.3	76.875	0.6455	0.246014	0.158802
1	Ahr-/-	10	NA	NA	NA	NA	NA	NA	NA
1	Ahr-/-	11	NA	NA	NA	NA	NA	NA	NA
1	Ahr-/-	12	NA	NA	NA	NA	NA	NA	NA
1	Ahr-/-	13	NA	NA	NA	NA	NA	NA	NA
1	Ahr-/-	14	NA	NA	NA	NA	NA	NA	NA
1	Ahr-/-	15	NA	NA	NA	NA	NA	NA	NA
2	Ahr-/-	0	37.3	0	17.8	100	10.1525	0	0
2	Ahr-/-	4	NA	NA	NA	NA	NA	0.026087	NA
2	Ahr-/-	5	37	-0.3	18.9	106.18	7.759	0.12848	0.996874
2	Ahr-/-	6	37.8	0.5	17.6	98.8764	4.39	0.303529	1.33249
2	Ahr-/-	7	34.4	-2.9	16.4	92.1348	1.9125	0.46747	0.894036
2	Ahr-/-	8	29.8	-7.5	15.2	85.3933	1.252	0.250501	0.313627
2	Ahr-/-	9	NA	NA	NA	NA	NA	NA	NA
2	Ahr-/-	10	NA	NA	NA	NA	NA	NA	NA
2	Ahr-/-	11	NA	NA	NA	NA	NA	NA	NA
2	Ahr-/-	12	NA	NA	NA	NA	NA	NA	NA
2	Ahr-/-	13	NA	NA	NA	NA	NA	NA	NA
2	Ahr-/-	14	NA	NA	NA	NA	NA	NA	NA
2	Ahr-/-	15	NA	NA	NA	NA	NA	NA	NA
3	Ahr-/-	0	37.4	0	16.5	100	9.225	0	0
3	Ahr-/-	4	NA	NA	NA	NA	8.389	0.0112867	0.094684
3	Ahr-/-	5	37.7	0.3	18.02	109.212	6.635	0.0385542	0.255807
3	Ahr-/-	6	37.9	0.5	17.6	106.667	8.3815	0.212714	1.78286
3	Ahr-/-	7	35.5	-1.9	16	96.9697	2.5105	0.320225	0.803924
3	Ahr-/-	8	26.3	-11.1	14.22	86.1818	1.416	NA	NA
3	Ahr-/-	9	26.4	-11	13.62	82.5455	1.0775	0.375281	0.404365
3	Ahr-/-	10	NA	NA	NA	NA	NA	NA	NA
3	Ahr-/-	11	NA	NA	NA	NA	NA	NA	NA
3	Ahr-/-	12	NA	NA	NA	NA	NA	NA	NA
3	Ahr-/-	13	NA	NA	NA	NA	NA	NA	NA
3	Ahr-/-	14	NA	NA	NA	NA	NA	NA	NA
3	Ahr-/-	15	NA	NA	NA	NA	NA	NA	NA
4	Ahr-/-	0	37.1	0	14.9	100	7.4225	0	0
4	Ahr-/-	4	NA	NA	NA	NA	8.434	0.00909091	0.0766727
4	Ahr-/-	5	37.6	0.5	15.48	103.893	7.182	0.0534188	0.383654
4	Ahr-/-	6	38.2	1.1	15.3	102.685	5.835	0.15587	0.909504
4	Ahr-/-	7	35.7	-1.4	14.5	97.3154	2.9375	0.313636	0.921307
4	Ahr-/-	8	30.2	-6.9	12.9	86.5772	1.6085	0.40133	0.64554
4	Ahr-/-	9	26.8	-10.3	12.17	81.6779	1.8425	0.375286	0.691465
4	Ahr-/-	10	25.6	-11.5	11.62	77.9866	0.754	NA	NA
4	Ahr-/-	11	NA	NA	NA	NA	NA	NA	NA
4	Ahr-/-	12	NA	NA	NA	NA	NA	NA	NA
4	Ahr-/-	13	NA	NA	NA	NA	NA	NA	NA
4	Ahr-/-	14	NA	NA	NA	NA	NA	NA	NA
4	Ahr-/-	15	NA	NA	NA	NA	NA	NA	NA
5	Ahr-/-	0	37	0	17.5	100	8.295	0	0
5	Ahr-/-	4	NA	NA	NA	NA	8.4475	0.00452489	0.038224
5	Ahr-/-	5	37.5	0.5	19.82	113.257	6.263	0.0326087	0.204228
5	Ahr-/-	6	37.6	0.6	19.2	109.714	5.52	0.166311	0.918038
5	Ahr-/-	7	36.7	-0.3	17.8	101.714	2.582	0.403974	1.04306
5	Ahr-/-	8	30	-7	16.11	92.0571	1.1195	0.223553	0.250267
5	Ahr-/-	9	29.8	-7.2	14.93	85.3143	0.871	0.286325	0.249389
5	Ahr-/-	10	26.3	-10.7	14.23	81.3143	0.802	NA	NA
5	Ahr-/-	11	26.2	-10.8	14.01	80.0571	0.4935	0.104072	0.0513597
5	Ahr-/-	12	NA	NA	NA	NA	NA	NA	NA
5	Ahr-/-	13	NA	NA	NA	NA	NA	NA	NA
5	Ahr-/-	14	NA	NA	NA	NA	NA	NA	NA
5	Ahr-/-	15	NA	NA	NA	NA	NA	NA	NA
6	Ahr-/-	0	37.7	0	17.6	100	7.61	0	0
6	Ahr-/-	4	NA	NA	NA	NA	9.252	0.0144578	0.133764
6	Ahr-/-	5	37.6	-0.1	18.43	104.716	7.6775	0.040568	0.31146
6	Ahr-/-	6	38.1	0.4	18.6	105.682	6.2215	0.146998	0.914548
6	Ahr-/-	7	36.5	-1.2	17.4	98.8636	3.323	0.313501	1.04176
6	Ahr-/-	8	29.6	-8.1	15.23	86.5341	1.123	0.302817	0.340063
6	Ahr-/-	9	28.7	-9	14.18	80.5682	1.004	0.331924	0.333252
6	Ahr-/-	10	26.1	-11.6	13.46	76.4773	0.488	NA	NA
6	Ahr-/-	11	NA	NA	NA	NA	NA	NA	NA
6	Ahr-/-	12	NA	NA	NA	NA	NA	NA	NA
6	Ahr-/-	13	NA	NA	NA	NA	NA	NA	NA
6	Ahr-/-	14	NA	NA	NA	NA	NA	NA	NA
6	Ahr-/-	15	NA	NA	NA	NA	NA	NA	NA
7	Ahr-/-	0	37.6	0	20.74	100	6.893	0	0
7	Ahr-/-	4	NA	NA	NA	NA	5.086	0.00446429	0.0227054
7	Ahr-/-	5	37.8	0.2	20.57	99.1803	7.617	0.0511727	0.389783
7	Ahr-/-	6	37.3	-0.3	20.52	98.9392	6.7995	0.103158	0.701422
7	Ahr-/-	7	37.9	0.3	19.64	94.6962	4.6655	0.189066	0.882088
7	Ahr-/-	8	30.8	-6.8	18.74	90.3568	2.0585	0.274157	0.564353
7	Ahr-/-	9	27.2	-10.4	16.68	80.4243	1.407	0.226757	0.319048
7	Ahr-/-	10	28.1	-9.5	15.57	75.0723	1.2775	0.311111	0.397444
7	Ahr-/-	11	NA	NA	NA	NA	NA	NA	NA
7	Ahr-/-	12	NA	NA	NA	NA	NA	NA	NA
7	Ahr-/-	13	NA	NA	NA	NA	NA	NA	NA
7	Ahr-/-	14	NA	NA	NA	NA	NA	NA	NA
7	Ahr-/-	15	NA	NA	NA	NA	NA	NA	NA
8	Ahr-/-	0	37.1	0	21.22	100	6.8495	0	0
8	Ahr-/-	4	NA	NA	NA	NA	7.4615	0.00228311	0.0170354
8	Ahr-/-	5	37.4	0.3	21.15	99.6701	4.461	0.0354478	0.158132
8	Ahr-/-	6	37.4	0.3	21.06	99.246	4.623	0.078341	0.362171
8	Ahr-/-	7	37.6	0.5	20.54	96.7955	3.3275	0.235294	0.782941
8	Ahr-/-	8	32.3	-4.8	19.43	91.5646	1.625	0.349887	0.568567
8	Ahr-/-	9	28.4	-8.7	17.87	84.213	0.7775	0.199085	0.154788
8	Ahr-/-	10	29.2	-7.9	16.5	77.7568	0.9985	0.178357	0.178089
8	Ahr-/-	11	NA	NA	NA	NA	NA	NA	NA
8	Ahr-/-	12	NA	NA	NA	NA	NA	NA	NA
8	Ahr-/-	13	NA	NA	NA	NA	NA	NA	NA
8	Ahr-/-	14	NA	NA	NA	NA	NA	NA	NA
8	Ahr-/-	15	NA	NA	NA	NA	NA	NA	NA
9	Ahr-/-	0	37.3	0	18.17	100	5.522	0	0
9	Ahr-/-	4	NA	NA	NA	NA	6.251	0.00469484	0.0293474
9	Ahr-/-	5	37.7	0.4	18.37	101.101	3.3735	0.0595238	0.200804
9	Ahr-/-	6	38	0.7	18.79	103.412	4.573	0.162651	0.743801
9	Ahr-/-	7	36.5	-0.8	17.61	96.918	2.1275	0.286976	0.610541
9	Ahr-/-	8	27.1	-10.2	16.17	88.9928	0.6405	0.299363	0.191742
9	Ahr-/-	9	28.5	-8.8	14.73	81.0677	0.8815	0.373171	0.32895
9	Ahr-/-	10	NA	NA	NA	NA	NA	NA	NA
9	Ahr-/-	11	NA	NA	NA	NA	NA	NA	NA
9	Ahr-/-	12	NA	NA	NA	NA	NA	NA	NA
9	Ahr-/-	13	NA	NA	NA	NA	NA	NA	NA
9	Ahr-/-	14	NA	NA	NA	NA	NA	NA	NA
9	Ahr-/-	15	NA	NA	NA	NA	NA	NA	NA
10	Ahr-/-	0	37.4	0	20.17	100	4.7605	0	0
10	Ahr-/-	4	NA	NA	NA	NA	8.282	0.00928074	0.0768631
10	Ahr-/-	5	37.5	0.1	20.58	102.033	5.1615	0.0602679	0.311073
10	Ahr-/-	6	37.8	0.4	20.44	101.339	4.789	0.169412	0.811313
10	Ahr-/-	7	35.8	-1.6	19.37	96.0337	1.9825	0.347087	0.688101
10	Ahr-/-	8	29.1	-8.3	17.27	85.6222	0.917	0.432243	0.396367
10	Ahr-/-	9	26.8	-10.6	16.66	82.5979	0.674	0.325359	0.219292
10	Ahr-/-	10	NA	NA	NA	NA	NA	NA	NA
10	Ahr-/-	11	NA	NA	NA	NA	NA	NA	NA
10	Ahr-/-	12	NA	NA	NA	NA	NA	NA	NA
10	Ahr-/-	13	NA	NA	NA	NA	NA	NA	NA
10	Ahr-/-	14	NA	NA	NA	NA	NA	NA	NA
10	Ahr-/-	15	NA	NA	NA	NA	NA	NA	NA
11	Ahr-/-	0	37.1	0	21.13	100	7.57	0	0
11	Ahr-/-	4	NA	NA	NA	NA	8.273	0.00680272	0.0562789
11	Ahr-/-	5	37.8	0.7	20.58	97.3971	6.105	0.0186335	0.113758
11	Ahr-/-	6	37.5	0.4	20.72	98.0596	5.6605	0.0873563	0.49448
11	Ahr-/-	7	35.8	-1.3	19.74	93.4217	3.229	0.135747	0.438326
11	Ahr-/-	8	32	-5.1	18.5	87.5532	1.3315	0.346939	0.461949
11	Ahr-/-	9	27	-10.1	17.08	80.8329	1.0995	0.144522	0.158902
11	Ahr-/-	10	28.6	-8.5	15.93	75.3904	0.866	0.190361	0.164853
11	Ahr-/-	11	NA	NA	NA	NA	NA	NA	NA
11	Ahr-/-	12	NA	NA	NA	NA	NA	NA	NA
11	Ahr-/-	13	NA	NA	NA	NA	NA	NA	NA
11	Ahr-/-	14	NA	NA	NA	NA	NA	NA	NA
11	Ahr-/-	15	NA	NA	NA	NA	NA	NA	NA
12	Ahr+/-	0	37.7	0	17.6	100	6.8385	0	0
12	Ahr+/-	4	NA	NA	NA	NA	NA	0.002331	NA
12	Ahr+/-	5	36.9	-0.8	18.6	105.682	8.247	0.0131579	0.108513
12	Ahr+/-	6	37.9	0.2	18.7	106.25	6.9385	0.090708	0.629377
12	Ahr+/-	7	37.3	-0.4	18	102.273	5.5295	0.226852	1.25438
12	Ahr+/-	8	34.8	-2.9	16.9	96.0227	2.99	0.275229	0.822936
12	Ahr+/-	9	32	-5.7	16.1	91.4773	1.2785	0.186207	0.238066
12	Ahr+/-	10	31	-6.7	15.95	90.625	1.0875	0.0929705	0.101105
12	Ahr+/-	11	34.8	-2.9	16.63	94.4886	1.402	0.0155556	0.0218089
12	Ahr+/-	12	36.3	-1.4	17.07	96.9886	3.364	0.0127389	0.0428535
12	Ahr+/-	13	36.7	-1	17.76	100.909	3.9755	0.00453515	0.0180295
12	Ahr+/-	14	36.8	-0.9	18.7	106.25	5.2095	0.022869	0.119136
12	Ahr+/-	15	37.6	-0.1	19.1	108.523	4.956	0.0376569	0.186628
13	Ahr+/-	0	37.6	0	16.5	100	7.319	0	0
13	Ahr+/-	4	NA	NA	NA	NA	NA	0.00392927	NA
13	Ahr+/-	5	37.4	-0.2	17.6	106.667	7.5575	0.0381166	0.288066
13	Ahr+/-	6	37.8	0.2	17.1	103.636	6.7075	0.112335	0.753486
13	Ahr+/-	7	36.8	-0.8	16.5	100	2.981	0.242494	0.722875
13	Ahr+/-	8	33.3	-4.3	15.8	95.7576	2.0065	0.22779	0.457062
13	Ahr+/-	9	31.8	-5.8	14.8	89.697	1.136	0.145786	0.165613
13	Ahr+/-	10	33.2	-4.4	15.04	91.1515	1.288	0.0556745	0.0717088
13	Ahr+/-	11	35.1	-2.5	15.49	93.8788	2.7845	0.00921659	0.0256636
13	Ahr+/-	12	36.8	-0.8	16.49	99.9394	4.2965	0.00205339	0.00882238
13	Ahr+/-	13	36.7	-0.9	17.55	106.364	3.7725	0.00225734	0.0085158
13	Ahr+/-	14	36.5	-1.1	18.1	109.697	5.1405	0.00468384	0.0240773
13	Ahr+/-	15	37.5	-0.1	17.9	108.485	5.483	0.0107759	0.0590841
14	Ahr+/-	0	37.1	0	18.4	100	7.3345	0	0
14	Ahr+/-	4	NA	NA	NA	NA	8.134	0	0
14	Ahr+/-	5	37.5	0.4	19.22	104.457	7.5335	0.0177384	0.133632
14	Ahr+/-	6	37.3	0.2	19.1	103.804	6.7895	0.0886598	0.601956
14	Ahr+/-	7	36.9	-0.2	18.6	101.087	5.5485	0.16087	0.892585
14	Ahr+/-	8	33.1	-4	17.62	95.7609	3.144	NA	NA
14	Ahr+/-	9	29.9	-7.2	16.37	88.9674	1.7565	0.153488	0.269602
14	Ahr+/-	10	31.4	-5.7	15.44	83.913	1.8495	NA	NA
14	Ahr+/-	11	34.5	-2.6	16.26	88.3696	2.8075	0.0251716	0.0706693
14	Ahr+/-	12	35.7	-1.4	17.28	93.913	4.1215	0.0136364	0.0562023
14	Ahr+/-	13	35.7	-1.4	18.44	100.217	4.1025	0.013363	0.0548218
14	Ahr+/-	14	36.8	-0.3	19.2	104.348	5.503	0.04	0.22012
14	Ahr+/-	15	36.3	-0.8	19.5	105.978	4.7615	0.0252874	0.120406
15	Ahr+/-	0	37.6	0	16.6	100	5.711	0	0
15	Ahr+/-	4	NA	NA	NA	NA	8.9755	0.0021978	0.0197264
15	Ahr+/-	5	38.2	0.6	17.53	105.602	7.5245	0.02746	0.206622
15	Ahr+/-	6	38.3	0.7	17.5	105.422	6.7305	0.0760668	0.511968
15	Ahr+/-	7	36.8	-0.8	16.7	100.602	5.474	0.162228	0.888034
15	Ahr+/-	8	33.7	-3.9	15.44	93.012	2.4925	0.106838	0.266293
15	Ahr+/-	9	34.7	-2.9	14.4	86.747	2.424	0.0548523	0.132962
15	Ahr+/-	10	36.1	-1.5	15.66	94.3373	3.0845	NA	NA
15	Ahr+/-	11	36.5	-1.1	17.35	104.518	4.6515	0.0113379	0.0527381
15	Ahr+/-	12	37.1	-0.5	18.18	109.518	6.3775	0.0151188	0.0964201
15	Ahr+/-	13	36.6	-1	18.4	110.843	4.9965	0.055666	0.278135
15	Ahr+/-	14	37.2	-0.4	18.5	111.446	4.5555	0.0546318	0.248875
15	Ahr+/-	15	37.1	-0.5	18.4	110.843	3.848	0.0563674	0.216902
16	Ahr+/-	0	37	0	17.8	100	8.506	0	0
16	Ahr+/-	4	NA	NA	NA	NA	8.94	0.00238663	0.0213365
16	Ahr+/-	5	37.3	0.3	18.88	106.067	7.5085	0.016317	0.122516
16	Ahr+/-	6	36.5	-0.5	19.3	108.427	7.8225	0.0683112	0.534364
16	Ahr+/-	7	37.1	0.1	18.9	106.18	5.886	0.145833	0.858375
16	Ahr+/-	8	36.4	-0.6	18.37	103.202	4.0785	0.264317	1.07802
16	Ahr+/-	9	33.1	-3.9	17.02	95.618	2.0175	0.203024	0.4096
16	Ahr+/-	10	34	-3	16.44	92.3596	1.61	NA	NA
16	Ahr+/-	11	35.2	-1.8	17.02	95.618	3.485	0.0408602	0.142398
16	Ahr+/-	12	36.3	-0.7	18.11	101.742	4.396	0.0046729	0.0205421
16	Ahr+/-	13	35.7	-1.3	18.91	106.236	4.435	0.0273973	0.121507
16	Ahr+/-	14	36.7	-0.3	19.8	111.236	4.275	0.0809628	0.346116
16	Ahr+/-	15	36.6	-0.4	19.5	109.551	3.9575	0.0720339	0.285074
17	Ahr+/-	0	36.5	0	18.5	100	6.7215	0	0
17	Ahr+/-	4	NA	NA	NA	NA	9.0055	0	0
17	Ahr+/-	5	37.5	1	18.89	102.108	7.5575	0.0196937	0.148835
17	Ahr+/-	6	36	-0.5	18.8	101.622	7.1235	0.0757895	0.539886
17	Ahr+/-	7	36.5	0	18.2	98.3784	6.7165	0.172708	1.15999
17	Ahr+/-	8	36.4	-0.1	17.45	94.3243	3.19	0.237986	0.759176
17	Ahr+/-	9	30.2	-6.3	16.5	89.1892	1.6675	0.172577	0.287772
17	Ahr+/-	10	29.9	-6.6	15.64	84.5405	1.7365	NA	NA
17	Ahr+/-	11	35.4	-1.1	16.62	89.8378	2.989	0.0189125	0.0565296
17	Ahr+/-	12	35.8	-0.7	17.47	94.4324	4.5885	0.0196078	0.0899706
17	Ahr+/-	13	36.2	-0.3	18.55	100.27	4.7835	0.0146138	0.069905
17	Ahr+/-	14	37.1	0.6	19.7	106.486	5.576	0.0345622	0.192719
17	Ahr+/-	15	36.5	0	19.5	105.405	5.0305	0.0468165	0.23551
18	Ahr+/-	0	37	0	18.4	100	7.111	0	0
18	Ahr+/-	4	NA	NA	NA	NA	9.286	0.00421941	0.0391814
18	Ahr+/-	5	37.1	0.1	18.89	102.663	4.476	0.00821355	0.0367639
18	Ahr+/-	6	36.9	-0.1	18.8	102.174	7.199	0.0613861	0.441919
18	Ahr+/-	7	37	0	18.5	100.543	5.5515	0.12761	0.708428
18	Ahr+/-	8	36.7	-0.3	17.7	96.1957	3.721	0.202869	0.754875
18	Ahr+/-	9	30.3	-6.7	16.55	89.9457	1.7855	0.154867	0.276515
18	Ahr+/-	10	32.6	-4.4	16.16	87.8261	1.857	NA	NA
18	Ahr+/-	11	35.7	-1.3	17.36	94.3478	3.5305	0.044186	0.155999
18	Ahr+/-	12	35.9	-1.1	17.95	97.5543	4.798	0.0190275	0.0912939
18	Ahr+/-	13	36.3	-0.7	18.68	101.522	4.4045	0.027957	0.123137
18	Ahr+/-	14	37.2	0.2	19.8	107.609	4.6805	0.0416667	0.195021
18	Ahr+/-	15	36.9	-0.1	19.7	107.065	3.9825	0.0666667	0.2655
19	Ahr+/-	0	37.8	0	14.9	100	8.174	0	0
19	Ahr+/-	4	NA	NA	NA	NA	10.1165	0.00238095	0.0240869
19	Ahr+/-	5	38.1	0.3	16.06	107.785	7.55	0.0107296	0.0810086
19	Ahr+/-	6	38.1	0.3	15.8	106.04	6.8895	0.0306748	0.211334
19	Ahr+/-	7	37.8	0	15.4	103.356	6.314	0.12311	0.777317
19	Ahr+/-	8	37.1	-0.7	14.73	98.8591	4.0635	0.14382	0.584413
19	Ahr+/-	9	30.9	-6.9	13.84	92.8859	2.1215	0.238411	0.505788
19	Ahr+/-	10	30.1	-7.7	13.38	89.7987	1.9915	NA	NA
19	Ahr+/-	11	NA	NA	NA	NA	NA	NA	NA
19	Ahr+/-	12	NA	NA	NA	NA	NA	NA	NA
19	Ahr+/-	13	NA	NA	NA	NA	NA	NA	NA
19	Ahr+/-	14	NA	NA	NA	NA	NA	NA	NA
19	Ahr+/-	15	NA	NA	NA	NA	NA	NA	NA
20	Ahr+/+	0	37.6	0	17.5	100	8.07	0	0
20	Ahr+/+	4	NA	NA	NA	NA	NA	0.00444444	NA
20	Ahr+/+	5	36.4	-1.2	18.1	103.429	8.8335	0.0204082	0.180276
20	Ahr+/+	6	36.6	-1	18.3	104.571	7.915	0.0636792	0.504021
20	Ahr+/+	7	36.6	-1	17.8	101.714	7.2545	0.175476	1.27299
20	Ahr+/+	8	35.9	-1.7	16.8	96	4.416	0.219955	0.97132
20	Ahr+/+	9	35	-2.6	16.1	92	2.5785	0.0771536	0.19894
20	Ahr+/+	10	35	-2.6	15.95	91.1429	1.8675	0.122845	0.229413
20	Ahr+/+	11	36	-1.6	16.69	95.3714	2.466	0.0431818	0.106486
20	Ahr+/+	12	35.8	-1.8	17.56	100.343	4.14	0.0310421	0.128514
20	Ahr+/+	13	36.9	-0.7	18.39	105.086	5.305	0.0319635	0.169566
20	Ahr+/+	14	36.4	-1.2	18.9	108	2.6505	0.0301318	0.0798644
20	Ahr+/+	15	37.7	0.1	19.1	109.143	3.099	0.0273349	0.0847107
21	Ahr+/+	0	37.7	0	17.4	100	7.0415	0	0
21	Ahr+/+	4	NA	NA	NA	NA	NA	0.0023753	NA
21	Ahr+/+	5	37	-0.7	18.5	106.322	7.3885	0.0420168	0.310441
21	Ahr+/+	6	37.4	-0.3	18.7	107.471	6.342	0.128319	0.813796
21	Ahr+/+	7	37.4	-0.3	17.8	102.299	5.4825	0.238806	1.30925
21	Ahr+/+	8	33.5	-4.2	16.9	97.1264	2.749	0.311404	0.856048
21	Ahr+/+	9	33.4	-4.3	16.1	92.5287	1.752	0.213983	0.374898
21	Ahr+/+	10	34.3	-3.4	15.82	90.9195	1.2165	0.0661939	0.0805248
21	Ahr+/+	11	35.6	-2.1	17.15	98.5632	2.3895	0.0107527	0.0256935
21	Ahr+/+	12	36.6	-1.1	17.83	102.471	3.9175	0.0126582	0.0495886
21	Ahr+/+	13	37	-0.7	17.96	103.218	3.1035	0.012474	0.0387131
21	Ahr+/+	14	36.9	-0.8	19.1	109.77	4.16	0.00449438	0.0186966
21	Ahr+/+	15	37.8	0.1	18.4	105.747	4.891	0.00851064	0.0416255
22	Ahr+/+	0	37.6	0	16.5	100	7.909	0	0
22	Ahr+/+	4	NA	NA	NA	NA	NA	0.0121951	NA
22	Ahr+/+	5	37.6	0	16.9	102.424	8.184	0.0244898	0.200424
22	Ahr+/+	6	37.9	0.3	17	103.03	6.798	0.0684932	0.465616
22	Ahr+/+	7	36.8	-0.8	16.3	98.7879	4.494	0.159193	0.715413
22	Ahr+/+	8	33.3	-4.3	15.4	93.3333	2.915	0.193347	0.563607
22	Ahr+/+	9	33.1	-4.5	14.6	88.4848	2.06	0.136771	0.281749
22	Ahr+/+	10	34.7	-2.9	14.27	86.4848	2.4685	0.0563063	0.138992
22	Ahr+/+	11	36.2	-1.4	15.09	91.4545	3.0145	0.00483092	0.0145628
22	Ahr+/+	12	36.8	-0.8	16.03	97.1515	4.44	0.010142	0.0450304
22	Ahr+/+	13	37.2	-0.4	16.74	101.455	3.0245	0.0091954	0.0278115
22	Ahr+/+	14	37.2	-0.4	17.2	104.242	4.6745	0.00200401	0.00936774
22	Ahr+/+	15	37.9	0.3	17.1	103.636	4.854	0.00675676	0.0327973
23	Ahr+/+	0	37.8	0	17.3	100	8.0155	0	0
23	Ahr+/+	4	NA	NA	NA	NA	NA	0.0141176	NA
23	Ahr+/+	5	37.8	0	18	104.046	7.4945	0.0411523	0.308416
23	Ahr+/+	6	38.1	0.3	17.9	103.468	5.0535	0.151316	0.764674
23	Ahr+/+	7	36.1	-1.7	16.8	97.1098	4.5835	0.257683	1.18109
23	Ahr+/+	8	30.8	-7	15.8	91.3295	2.46	0.251121	0.617758
23	Ahr+/+	9	30.1	-7.7	14.8	85.5491	1.1685	0.0866935	0.101301
23	Ahr+/+	10	32.1	-5.7	14.27	82.4855	1.645	0.034188	0.0562393
23	Ahr+/+	11	34.3	-3.5	14.17	81.9075	2.245	0.0135135	0.0303378
23	Ahr+/+	12	36.4	-1.4	15.75	91.0405	3.3215	0.00236407	0.00785225
23	Ahr+/+	13	36.9	-0.9	16.79	97.052	3.723	0	0
23	Ahr+/+	14	37.4	-0.4	17.7	102.312	4.916	0.00896861	0.0440897
23	Ahr+/+	15	37.9	0.1	17.1	98.8439	4.525	0.0201794	0.0913117
24	Ahr+/+	0	37.3	0	15.3	100	7.284	0	0
24	Ahr+/+	4	NA	NA	NA	NA	NA	0.00452489	NA
24	Ahr+/+	5	37.9	0.6	16.3	106.536	9.0605	0.0189573	0.171763
24	Ahr+/+	6	38.1	0.8	16.5	107.843	7.908	0.0987903	0.781234
24	Ahr+/+	7	37.8	0.5	16.2	105.882	4.7435	0.225513	1.06972
24	Ahr+/+	8	32.6	-4.7	14.9	97.3856	2.804	0.316742	0.888145
24	Ahr+/+	9	30.3	-7	13.4	87.5817	0.78	0.156322	0.121931
24	Ahr+/+	10	31.3	-6	12.7	83.0065	0.8715	0.11479	0.10004
24	Ahr+/+	11	33.3	-4	12.68	82.8758	1.5545	0.0199115	0.0309524
24	Ahr+/+	12	35.2	-2.1	13.39	87.5163	1.8865	0.0152174	0.0287076
24	Ahr+/+	13	36.4	-0.9	14.59	95.3595	3.1165	0.00419287	0.0130671
24	Ahr+/+	14	37.1	-0.2	15	98.0392	2.8995	0.0103306	0.0299535
24	Ahr+/+	15	37.4	0.1	15.7	102.614	4.0205	0.00457666	0.0184005
25	Ahr+/+	0	36.8	0	18.5	100	9.1795	0	0
25	Ahr+/+	4	NA	NA	NA	NA	8.8755	0	0
25	Ahr+/+	5	36.8	0	18.95	102.432	8.0615	0.010989	0.0885879
25	Ahr+/+	6	36.7	-0.1	19.1	103.243	8.2875	0.0547945	0.45411
25	Ahr+/+	7	36.6	-0.2	19.1	103.243	6.7295	0.108889	0.732768
25	Ahr+/+	8	34	-2.8	18.35	99.1892	4.108	NA	NA
25	Ahr+/+	9	29.2	-7.6	17.23	93.1351	2.525	0.172485	0.435524
25	Ahr+/+	10	33.7	-3.1	16.32	88.2162	1.7925	NA	NA
25	Ahr+/+	11	33	-3.8	16.25	87.8378	2.396	0.0816777	0.1957
25	Ahr+/+	12	36.1	-0.7	17.35	93.7838	3.12	0.013986	0.0436364
25	Ahr+/+	13	36.5	-0.3	18	97.2973	4.2065	0.0224215	0.0943161
25	Ahr+/+	14	37.1	0.3	19.4	104.865	5.5375	0.0264317	0.146366
25	Ahr+/+	15	36.9	0.1	19.6	105.946	5.256	0.0236052	0.124069
26	Ahr+/+	0	36.4	0	17.9	100	8.387	0	0
26	Ahr+/+	4	NA	NA	NA	NA	9.9815	0.0021978	0.0219374
26	Ahr+/+	5	37.1	0.7	19.07	106.536	6.999	0.0154185	0.107914
26	Ahr+/+	6	36.1	-0.3	18.8	105.028	7.1685	0.0667976	0.478839
26	Ahr+/+	7	36.6	0.2	18.2	101.676	7.234	0.119497	0.86444
26	Ahr+/+	8	36.2	-0.2	17.07	95.3631	3.4565	0.21	0.725865
26	Ahr+/+	9	33.1	-3.3	15.95	89.1061	2.011	0.198732	0.399649
26	Ahr+/+	10	35.2	-1.2	16.3	91.0615	2.1105	NA	NA
26	Ahr+/+	11	35.8	-0.6	17.28	96.5363	3.36	0.0344828	0.115862
26	Ahr+/+	12	36.3	-0.1	18.55	103.631	4.0195	0.0117371	0.0471772
26	Ahr+/+	13	35.9	-0.5	19.51	108.994	4.113	0.033543	0.137962
26	Ahr+/+	14	36.9	0.5	20	111.732	5.07	0.0497738	0.252353
26	Ahr+/+	15	36.8	0.4	20	111.732	4.0365	0.0477327	0.192673
27	Ahr+/+	0	37.8	0	17.6	100	7.749	0	0
27	Ahr+/+	4	NA	NA	NA	NA	9.2255	0	0
27	Ahr+/+	5	37.8	0	18.96	107.727	8.5765	0.00867679	0.0744165
27	Ahr+/+	6	37.3	-0.5	19.1	108.523	7.3005	0.0179775	0.131245
27	Ahr+/+	7	37.5	-0.3	19.2	109.091	7.4055	0.101031	0.748185
27	Ahr+/+	8	36.9	-0.9	18.51	105.17	4.2005	0.208431	0.875514
27	Ahr+/+	9	35.6	-2.2	17.33	98.4659	2.403	0.225513	0.541907
27	Ahr+/+	10	34.8	-3	16.46	93.5227	1.884	NA	NA
27	Ahr+/+	11	35.4	-2.4	17.2	97.7273	3.8645	0.0221239	0.0854978
27	Ahr+/+	12	35.7	-2.1	18.12	102.955	4.216	0.0217865	0.0918519
27	Ahr+/+	13	36.2	-1.6	19.3	109.659	5.633	0.0187266	0.105487
27	Ahr+/+	14	36.7	-1.1	20	113.636	5.2515	0.045045	0.236554
27	Ahr+/+	15	37.4	-0.4	19.6	111.364	3.7585	0.0433925	0.163091
28	Ahr+/+	0	37.8	0	16.8	100	7.918	0	0
28	Ahr+/+	4	NA	NA	NA	NA	8.163	0.00856531	0.0699186
28	Ahr+/+	5	37.7	-0.1	18.88	112.381	8.208	0.0128205	0.105231
28	Ahr+/+	6	37.7	-0.1	18.9	112.5	6.5955	0.0887949	0.585647
28	Ahr+/+	7	37.5	-0.3	18.5	110.119	5.15	0.178947	0.921579
28	Ahr+/+	8	35.2	-2.6	17.41	103.631	2.5755	0.316629	0.815477
28	Ahr+/+	9	33.1	-4.7	15.84	94.2857	1.521	0.279518	0.425147
28	Ahr+/+	10	33.8	-4	15.93	94.8214	1.718	NA	NA
28	Ahr+/+	11	35.6	-2.2	17.15	102.083	3.142	0.0161663	0.0507945
28	Ahr+/+	12	36.7	-1.1	18.01	107.202	4.667	0.0217865	0.101678
28	Ahr+/+	13	36.6	-1.2	19.03	113.274	4.853	0.0176211	0.0855154
28	Ahr+/+	14	37.3	-0.5	19.9	118.452	4.4985	0.0483516	0.21751
28	Ahr+/+	15	37.6	-0.2	19.5	116.071	4.59	0.0378251	0.173617
29	Ahr+/+	0	36.1	0	17.9	100	9.4325	0	0
29	Ahr+/+	4	NA	NA	NA	NA	8.0025	0	0
29	Ahr+/+	5	36.7	0.6	18.7	104.469	8.1705	0.010352	0.0845807
29	Ahr+/+	6	36.1	0	18.7	104.469	8.162	0.0534884	0.436572
29	Ahr+/+	7	36.5	0.4	19	106.145	6.2595	0.128964	0.807251
29	Ahr+/+	8	37.2	1.1	18.23	101.844	4.268	0.231441	0.98779
29	Ahr+/+	9	30.8	-5.3	16.8	93.8547	2.653	0.202703	0.53777
29	Ahr+/+	10	31	-5.1	16.04	89.6089	1.7925	NA	NA
29	Ahr+/+	11	35	-1.1	17.2	96.0894	2.7375	0.05	0.136875
29	Ahr+/+	12	36	-0.1	18.42	102.905	4.1615	0.0210773	0.0877131
29	Ahr+/+	13	36.1	0	19.21	107.318	4.6955	0.0301624	0.141628
29	Ahr+/+	14	36.9	0.8	20.3	113.408	5.0405	0.0217391	0.109576
29	Ahr+/+	15	36.9	0.8	20	111.732	4.5005	0.0243902	0.109768

## Sheet: 3F
mouse	genotype	time	status (1 = dead)
1	Ahr-/-	10	1
2	Ahr-/-	9	1
3	Ahr-/-	10	1
4	Ahr-/-	11	1
5	Ahr-/-	12	1
6	Ahr-/-	11	1
7	Ahr-/-	10	1
8	Ahr-/-	10	1
9	Ahr-/-	10	1
10	Ahr-/-	10	1
11	Ahr-/-	10	1
12	Ahr+/-	15	0
13	Ahr+/-	15	0
14	Ahr+/-	15	0
15	Ahr+/-	15	0
16	Ahr+/-	15	0
17	Ahr+/-	15	0
18	Ahr+/-	15	0
19	Ahr+/-	11	1
20	Ahr+/+	15	0
21	Ahr+/+	15	0
22	Ahr+/+	15	0
23	Ahr+/+	15	0
24	Ahr+/+	15	0
25	Ahr+/+	15	0
26	Ahr+/+	15	0
27	Ahr+/+	15	0
28	Ahr+/+	15	0
29	Ahr+/+	15	0
