# Supplementary material for: Metabolic profiling during malaria reveals the role of the aryl hydrocarbon receptor in regulating kidney injury
Source: eLife. 2020 Oct 6;9:e60165. doi: 10.7554/eLife.60165 (PMC7538157; doi:10.7554/eLife.60165)
Supplement: Figure 4—figure supplement 2—source data 1. [file elife-60165-fig4-figsupp2-data1.xlsx]

## Sheet: 4 supplement 2A
mouse	genotype	target	relative expression
D	Ahr-/-	msp1	1.25
E	Ahr-/-	msp1	2.8
I	Ahr-/-	msp1	2.12
J	Ahr-/-	msp1	1.9
K	Ahr-/-	msp1	2.99
L	Ahr-/-	msp1	1.48
A	Ahr+/+	msp1	1.43
B	Ahr+/+	msp1	2.31
C	Ahr+/+	msp1	0.9
F	Ahr+/+	msp1	1.35
G	Ahr+/+	msp1	2.28
H	Ahr+/+	msp1	0.11

## Sheet: 4 supplement 2D
mouse	genotype	infected	target	fold change from Ahr+/- UI
29	Ahr+/-	I	hp	7.49
32	Ahr+/-	I	hp	3.54
33	Ahr+/-	I	hp	3.3
34	Ahr+/-	I	hp	4.36
35	Ahr+/-	I	hp	6.28
43	Ahr+/-	UI	hp	0.85
55	Ahr+/-	UI	hp	0.99
56	Ahr+/-	UI	hp	1.19
36	Ahr-/-	I	hp	9.24
37	Ahr-/-	I	hp	5.06
39	Ahr-/-	I	hp	11.62
40	Ahr-/-	I	hp	11.73
42	Ahr-/-	I	hp	6.3
30	Ahr-/-	UI	hp	1.38
54	Ahr-/-	UI	hp	1.05
57	Ahr-/-	UI	hp	2.38
59	Ahr-/-	UI	hp	2.75
29	Ahr+/-	I	hpx	3.19
32	Ahr+/-	I	hpx	1.85
33	Ahr+/-	I	hpx	1.8
34	Ahr+/-	I	hpx	2.41
35	Ahr+/-	I	hpx	3.11
43	Ahr+/-	UI	hpx	1.17
55	Ahr+/-	UI	hpx	0.94
56	Ahr+/-	UI	hpx	0.91
36	Ahr-/-	I	hpx	3.5
37	Ahr-/-	I	hpx	3.47
39	Ahr-/-	I	hpx	2.16
40	Ahr-/-	I	hpx	2.96
42	Ahr-/-	I	hpx	2.18
30	Ahr-/-	UI	hpx	1.43
54	Ahr-/-	UI	hpx	0.79
57	Ahr-/-	UI	hpx	1.45
59	Ahr-/-	UI	hpx	1.08
29	Ahr+/-	I	hrg1	1.48
32	Ahr+/-	I	hrg1	1.49
33	Ahr+/-	I	hrg1	1.81
34	Ahr+/-	I	hrg1	1.98
35	Ahr+/-	I	hrg1	2.22
43	Ahr+/-	UI	hrg1	1.07
55	Ahr+/-	UI	hrg1	1.21
56	Ahr+/-	UI	hrg1	0.78
36	Ahr-/-	I	hrg1	1.1
37	Ahr-/-	I	hrg1	0.98
39	Ahr-/-	I	hrg1	0.92
40	Ahr-/-	I	hrg1	1.07
42	Ahr-/-	I	hrg1	1.09
30	Ahr-/-	UI	hrg1	1.02
54	Ahr-/-	UI	hrg1	1.44
57	Ahr-/-	UI	hrg1	1.09
59	Ahr-/-	UI	hrg1	0.62
29	Ahr+/-	I	hmox1	53.89
32	Ahr+/-	I	hmox1	70.34
33	Ahr+/-	I	hmox1	48.15
34	Ahr+/-	I	hmox1	18.56
35	Ahr+/-	I	hmox1	32.24
43	Ahr+/-	UI	hmox1	0.82
55	Ahr+/-	UI	hmox1	1.02
56	Ahr+/-	UI	hmox1	1.19
36	Ahr-/-	I	hmox1	32.84
37	Ahr-/-	I	hmox1	24.1
39	Ahr-/-	I	hmox1	20.37
40	Ahr-/-	I	hmox1	39.94
42	Ahr-/-	I	hmox1	27.5
30	Ahr-/-	UI	hmox1	0.89
54	Ahr-/-	UI	hmox1	1.17
57	Ahr-/-	UI	hmox1	1.19
59	Ahr-/-	UI	hmox1	0.73
29	Ahr+/-	I	fth	1.52
32	Ahr+/-	I	fth	1.48
33	Ahr+/-	I	fth	1.1
34	Ahr+/-	I	fth	1.39
35	Ahr+/-	I	fth	2.8
43	Ahr+/-	UI	fth	1.31
55	Ahr+/-	UI	fth	0.87
56	Ahr+/-	UI	fth	0.88
36	Ahr-/-	I	fth	1.27
37	Ahr-/-	I	fth	1
39	Ahr-/-	I	fth	1.36
40	Ahr-/-	I	fth	1.92
42	Ahr-/-	I	fth	1.35
30	Ahr-/-	UI	fth	1.53
54	Ahr-/-	UI	fth	0.87
57	Ahr-/-	UI	fth	0.89
59	Ahr-/-	UI	fth	1.12
35	Ahr+/-	I	mfsd7b	2.99
29	Ahr+/-	I	mfsd7b	1.8
32	Ahr+/-	I	mfsd7b	2.17
33	Ahr+/-	I	mfsd7b	5.94
34	Ahr+/-	I	mfsd7b	4.4
43	Ahr+/-	UI	mfsd7b	1
55	Ahr+/-	UI	mfsd7b	1.7
56	Ahr+/-	UI	mfsd7b	0.59
39	Ahr-/-	I	mfsd7b	1
40	Ahr-/-	I	mfsd7b	2.51
42	Ahr-/-	I	mfsd7b	3.05
36	Ahr-/-	I	mfsd7b	2.28
37	Ahr-/-	I	mfsd7b	2.38
59	Ahr-/-	UI	mfsd7b	0.97
30	Ahr-/-	UI	mfsd7b	2.55
54	Ahr-/-	UI	mfsd7b	1.62
57	Ahr-/-	UI	mfsd7b	6.96
29	Ahr+/-	I	mfsd7c	0.22
32	Ahr+/-	I	mfsd7c	0.45
33	Ahr+/-	I	mfsd7c	0.58
34	Ahr+/-	I	mfsd7c	1.71
35	Ahr+/-	I	mfsd7c	0.93
43	Ahr+/-	UI	mfsd7c	1.36
55	Ahr+/-	UI	mfsd7c	1.09
56	Ahr+/-	UI	mfsd7c	0.68
36	Ahr-/-	I	mfsd7c	0.9
37	Ahr-/-	I	mfsd7c	0.85
39	Ahr-/-	I	mfsd7c	1.04
40	Ahr-/-	I	mfsd7c	1.03
42	Ahr-/-	I	mfsd7c	0.68
30	Ahr-/-	UI	mfsd7c	1.41
54	Ahr-/-	UI	mfsd7c	1.87
57	Ahr-/-	UI	mfsd7c	1.82
59	Ahr-/-	UI	mfsd7c	2.5
29	Ahr+/-	I	slc40a1	0.81
32	Ahr+/-	I	slc40a1	1.23
33	Ahr+/-	I	slc40a1	1.76
34	Ahr+/-	I	slc40a1	1.17
35	Ahr+/-	I	slc40a1	1.03
43	Ahr+/-	UI	slc40a1	1.14
55	Ahr+/-	UI	slc40a1	0.88
56	Ahr+/-	UI	slc40a1	0.25
40	Ahr-/-	I	slc40a1	0.44
42	Ahr-/-	I	slc40a1	0.89
36	Ahr-/-	I	slc40a1	0.44
37	Ahr-/-	I	slc40a1	0.48
39	Ahr-/-	I	slc40a1	0.3
54	Ahr-/-	UI	slc40a1	0.97
57	Ahr-/-	UI	slc40a1	0.79
59	Ahr-/-	UI	slc40a1	0.11
30	Ahr-/-	UI	slc40a1	0.62
29	Ahr+/-	I	trfc	1.13
32	Ahr+/-	I	trfc	1.37
34	Ahr+/-	I	trfc	0.68
35	Ahr+/-	I	trfc	0.71
43	Ahr+/-	UI	trfc	0.88
55	Ahr+/-	UI	trfc	1.15
56	Ahr+/-	UI	trfc	0.99
36	Ahr-/-	I	trfc	0.27
37	Ahr-/-	I	trfc	0.55
39	Ahr-/-	I	trfc	0.42
40	Ahr-/-	I	trfc	0.71
42	Ahr-/-	I	trfc	0.83
30	Ahr-/-	UI	trfc	3.31
54	Ahr-/-	UI	trfc	2.87
57	Ahr-/-	UI	trfc	4.49
59	Ahr-/-	UI	trfc	1.99
