# Supplementary material for: Metabolic profiling during malaria reveals the role of the aryl hydrocarbon receptor in regulating kidney injury
Source: eLife. 2020 Oct 6;9:e60165. doi: 10.7554/eLife.60165 (PMC7538157; doi:10.7554/eLife.60165)
Supplement: Figure 4—figure supplement 3—source data 1. [file elife-60165-fig4-figsupp3-data1.xlsx]

## Sheet: 4 supplement 3A
mouse	genotype	time	status (1 = dead)
1	AhR+/-	2	1
2	AhR+/-	3	1
3	AhR+/-	3	1
4	AhR+/-	2	1
5	AhR+/-	3	1
6	AhR+/-	4	1
7	AhR+/-	4	1
8	AhR+/-	2	1
9	AhR+/-	3	1
10	AhR-/-	2	1
11	AhR-/-	2	1
12	AhR-/-	6	0
13	AhR-/-	1	1
14	AhR-/-	2	1
15	AhR-/-	3	1
16	AhR-/-	6	0
17	AhR-/-	3	1
18	AhR-/-	2	1

## Sheet: 4 supplement 3B
mouse	genotype	day	10^6 RBCs/ul
1	AhR+/-	0	8.5865
2	AhR+/-	0	8.902
3	AhR+/-	0	8.9005
4	AhR+/-	0	8.813
5	AhR+/-	0	7.842
6	AhR+/-	0	8.0635
7	AhR+/-	0	8.0845
8	AhR+/-	0	8.1235
9	AhR+/-	0	8.184
10	AhR-/-	0	9.0355
11	AhR-/-	0	9.0785
12	AhR-/-	0	8.362
13	AhR-/-	0	9.264
14	AhR-/-	0	8.3755
15	AhR-/-	0	8.328
16	AhR-/-	0	8.2665
17	AhR-/-	0	7.6375
18	AhR-/-	0	9.171
1	AhR+/-	1	1.9425
2	AhR+/-	1	1.7485
3	AhR+/-	1	2.306
4	AhR+/-	1	1.6595
5	AhR+/-	1	1.956
6	AhR+/-	1	2.1755
7	AhR+/-	1	2.162
8	AhR+/-	1	2.3515
9	AhR+/-	1	2.3175
10	AhR-/-	1	2.577
11	AhR-/-	1	1.284
12	AhR-/-	1	1.9075
13	AhR-/-	1	NA
14	AhR-/-	1	1.955
15	AhR-/-	1	1.6905
16	AhR-/-	1	2.3865
17	AhR-/-	1	1.9605
18	AhR-/-	1	1.3535
1	AhR+/-	2	NA
2	AhR+/-	2	1.1075
3	AhR+/-	2	1.2245
4	AhR+/-	2	NA
5	AhR+/-	2	0.9235
6	AhR+/-	2	1.273
7	AhR+/-	2	1.2685
8	AhR+/-	2	NA
9	AhR+/-	2	0.966
10	AhR-/-	2	NA
11	AhR-/-	2	NA
12	AhR-/-	2	1.305
13	AhR-/-	2	NA
14	AhR-/-	2	NA
15	AhR-/-	2	0.5175
16	AhR-/-	2	1.5275
17	AhR-/-	2	1.5245
18	AhR-/-	2	NA
1	AhR+/-	3	NA
2	AhR+/-	3	NA
3	AhR+/-	3	NA
4	AhR+/-	3	NA
5	AhR+/-	3	NA
6	AhR+/-	3	0.776
7	AhR+/-	3	0.847
8	AhR+/-	3	NA
9	AhR+/-	3	NA
10	AhR-/-	3	NA
11	AhR-/-	3	NA
12	AhR-/-	3	1.579
13	AhR-/-	3	NA
14	AhR-/-	3	NA
15	AhR-/-	3	NA
16	AhR-/-	3	1.4325
17	AhR-/-	3	NA
18	AhR-/-	3	NA
1	AhR+/-	4	NA
2	AhR+/-	4	NA
3	AhR+/-	4	NA
4	AhR+/-	4	NA
5	AhR+/-	4	NA
6	AhR+/-	4	NA
7	AhR+/-	4	NA
8	AhR+/-	4	NA
9	AhR+/-	4	NA
10	AhR-/-	4	NA
11	AhR-/-	4	NA
12	AhR-/-	4	1.558
13	AhR-/-	4	NA
14	AhR-/-	4	NA
15	AhR-/-	4	NA
16	AhR-/-	4	1.4875
17	AhR-/-	4	NA
18	AhR-/-	4	NA

## Sheet: 4 supplement 3C
mouse	genotype	dpi	heme (uM)
1	AhR+/-	0	4.32638
2	AhR+/-	0	1.06486
3	AhR+/-	0	3.62748
4	AhR+/-	0	3.511
5	AhR+/-	0	2.8121
6	AhR+/-	0	8.86922
7	AhR+/-	0	619.011
8	AhR+/-	0	234.617
9	AhR+/-	0	164.727
10	AhR-/-	0	211.32
11	AhR-/-	0	118.134
12	AhR-/-	0	71.5409
13	AhR-/-	0	71.5409
14	AhR-/-	0	351.1
15	AhR-/-	0	386.045
16	AhR-/-	0	71.5409
17	AhR-/-	0	257.914
18	AhR-/-	0	292.859
1	AhR+/-	1	1273.43
2	AhR+/-	1	1310.38
3	AhR+/-	1	1199.53
4	AhR+/-	1	1150.26
5	AhR+/-	1	953.197
6	AhR+/-	1	1088.68
7	AhR+/-	1	1273.43
8	AhR+/-	1	1396.59
9	AhR+/-	1	1495.13
10	AhR-/-	1	1261.11
11	AhR-/-	1	965.514
12	AhR-/-	1	1014.78
14	AhR-/-	1	1310.38
15	AhR-/-	1	1027.1
16	AhR-/-	1	1039.41
17	AhR-/-	1	1371.96
18	AhR-/-	1	1532.08
2	AhR+/-	2	1900.46
3	AhR+/-	2	2715.95
5	AhR+/-	2	1878.42
6	AhR+/-	2	1217.2
7	AhR+/-	2	1018.84
9	AhR+/-	2	1492.71
12	AhR-/-	2	765.372
15	AhR-/-	2	1492.71
16	AhR-/-	2	544.967
17	AhR-/-	2	1073.94
6	AhR+/-	3	1318.12
7	AhR+/-	3	1374.54
12	AhR-/-	3	697.43
16	AhR-/-	3	460.44
12	AhR-/-	4	483.011
16	AhR-/-	4	178.31

## Sheet: 4 supplement 3D
mouse	genotype	dpi	BUN (mg/dL)
1	AhR+/-	0	50.6241
2	AhR+/-	0	50.2774
3	AhR+/-	0	75.5895
4	AhR+/-	0	55.8252
5	AhR+/-	0	50.6241
6	AhR+/-	0	69.3481
7	AhR+/-	0	62.7601
8	AhR+/-	0	53.3981
9	AhR+/-	0	36.7545
10	AhR-/-	0	42.6491
11	AhR-/-	0	40.9154
12	AhR-/-	0	46.1165
13	AhR-/-	0	46.4632
14	AhR-/-	0	43.6893
15	AhR-/-	0	44.3828
16	AhR-/-	0	46.1165
17	AhR-/-	0	35.7143
18	AhR-/-	0	33.2871
1	AhR+/-	1	96.6975
2	AhR+/-	1	138.97
3	AhR+/-	1	97.7543
4	AhR+/-	1	142.668
5	AhR+/-	1	79.2602
6	AhR+/-	1	120.476
7	AhR+/-	1	91.9419
8	AhR+/-	1	99.3395
9	AhR+/-	1	70.8058
10	AhR-/-	1	71.8626
11	AhR-/-	1	96.1691
12	AhR-/-	1	53.897
14	AhR-/-	1	171.731
15	AhR-/-	1	108.322
16	AhR-/-	1	76.6182
17	AhR-/-	1	199.207
18	AhR-/-	1	112.021
2	AhR+/-	2	261.03
3	AhR+/-	2	189.168
5	AhR+/-	2	195.509
6	AhR+/-	2	141.612
7	AhR+/-	2	192.338
9	AhR+/-	2	237.781
12	AhR-/-	2	88.2431
15	AhR-/-	2	151.651
16	AhR-/-	2	44.3857
17	AhR-/-	2	352.972
6	AhR+/-	3	219.287
7	AhR+/-	3	393.131
12	AhR-/-	3	49.6697
16	AhR-/-	3	45.4425
12	AhR-/-	4	49.6697
16	AhR-/-	4	31.7041
