# Supplementary material for: Metabolic profiling during malaria reveals the role of the aryl hydrocarbon receptor in regulating kidney injury
Source: eLife. 2020 Oct 6;9:e60165. doi: 10.7554/eLife.60165 (PMC7538157; doi:10.7554/eLife.60165)
Supplement: Figure 4—source data 1. [file elife-60165-fig4-data1.xlsx]

## Sheet: 4A
mouse	genotype	dpi	ALT (U/L)
44	Ahr-/-	0	7.66194
45	Ahr-/-	0	8.10605
46	Ahr-/-	0	6.32961
48	Ahr-/-	0	8.99428
49	Ahr-/-	0	10.8338
53	Ahr-/-	0	9.25371
47	Ahr+/-	0	6.77372
50	Ahr+/-	0	13.0459
51	Ahr+/-	0	10.6758
52	Ahr+/-	0	10.6758
60	Ahr+/-	0	11.4658
64	Ahr-/-	5	13.5199
65	Ahr-/-	5	15.258
66	Ahr-/-	5	14.942
61	Ahr+/-	5	11.6238
62	Ahr+/-	5	11.3078
63	Ahr+/-	5	12.2559
2	Ahr-/-	7	22.5397
11	Ahr-/-	7	29.6454
16	Ahr-/-	7	23.2058
22	Ahr-/-	7	17.4324
31	Ahr-/-	7	82.2726
69	Ahr-/-	7	42.9095
70	Ahr-/-	7	25.5286
72	Ahr-/-	7	22.5264
1	Ahr+/-	7	77.6037
6	Ahr+/-	7	22.5397
7	Ahr+/-	7	79.2864
14	Ahr+/-	7	17.2103
15	Ahr+/-	7	66.5066
67	Ahr+/-	7	15.258
68	Ahr+/-	7	14.31
71	Ahr+/-	7	13.3619
36	Ahr-/-	8	65.5167
37	Ahr-/-	8	58.855
39	Ahr-/-	8	65.5167
40	Ahr-/-	8	89.9428
42	Ahr-/-	8	56.6344
29	Ahr+/-	8	633.979
32	Ahr+/-	8	776.094
33	Ahr+/-	8	2300.04
34	Ahr+/-	8	1302.37
35	Ahr+/-	8	363.071

## Sheet: 4B
mouse	genotype	dpi	BUN (mg/dL)
44	Ahr-/-	0	53.9693
45	Ahr-/-	0	46.7064
46	Ahr-/-	0	53.0664
48	Ahr-/-	0	50.4618
49	Ahr-/-	0	45.9043
53	Ahr-/-	0	57.3721
47	Ahr+/-	0	43.7408
51	Ahr+/-	0	61.7481
52	Ahr+/-	0	55.0539
60	Ahr+/-	0	63.9135
64	Ahr-/-	5	42.2917
65	Ahr-/-	5	70.0568
66	Ahr-/-	5	67.402
61	Ahr+/-	5	58.4692
62	Ahr+/-	5	57.8472
63	Ahr+/-	5	76.4423
2	Ahr-/-	7	237.734
11	Ahr-/-	7	146.781
16	Ahr-/-	7	312.846
22	Ahr-/-	7	82.1724
31	Ahr-/-	7	191.774
69	Ahr-/-	7	170.156
70	Ahr-/-	7	151.591
72	Ahr-/-	7	300
1	Ahr+/-	7	309.155
6	Ahr+/-	7	44.224
7	Ahr+/-	7	67.8022
14	Ahr+/-	7	62.9067
15	Ahr+/-	7	66.0929
67	Ahr+/-	7	62.6103
68	Ahr+/-	7	76.6667
71	Ahr+/-	7	62.3438
36	Ahr-/-	8	596.607
37	Ahr-/-	8	370.893
39	Ahr-/-	8	479.983
40	Ahr-/-	8	477.771
42	Ahr-/-	8	369.92
73	Ahr-/-	8	377.596
74	Ahr-/-	8	195.462
75	Ahr-/-	8	247.267
77	Ahr-/-	8	667.499
29	Ahr+/-	8	97.2256
32	Ahr+/-	8	131.474
33	Ahr+/-	8	213.278
34	Ahr+/-	8	98.2037
35	Ahr+/-	8	97.9794
78	Ahr+/-	8	163.493
79	Ahr+/-	8	49.6324
80	Ahr+/-	8	80.4307
81	Ahr+/-	8	173.197
82	Ahr+/-	8	78.4128

## Sheet: 4C
mouse	genotype	infected	target	fold change from Ahr+/- UI	dpi
29	Ahr+/-	I	Hvcr1	6.3	8
32	Ahr+/-	I	Hvcr1	23.07	8
33	Ahr+/-	I	Hvcr1	99.13	8
34	Ahr+/-	I	Hvcr1	79.01	8
35	Ahr+/-	I	Hvcr1	28.54	8
36	Ahr-/-	I	Hvcr1	1121.24	8
37	Ahr-/-	I	Hvcr1	315.68	8
39	Ahr-/-	I	Hvcr1	522.73	8
40	Ahr-/-	I	Hvcr1	486.58	8
42	Ahr-/-	I	Hvcr1	133.56	8
38	Ahr+/-	UI	Hvcr1	0.56	8
41	Ahr+/-	UI	Hvcr1	0.79	8
43	Ahr+/-	UI	Hvcr1	2.11	8
55	Ahr+/-	UI	Hvcr1	0.54	8
56	Ahr+/-	UI	Hvcr1	2.02	8
30	Ahr-/-	UI	Hvcr1	10.51	8
54	Ahr-/-	UI	Hvcr1	1.25	8
57	Ahr-/-	UI	Hvcr1	1.89	8
58	Ahr-/-	UI	Hvcr1	6.49	8
59	Ahr-/-	UI	Hvcr1	15.92	8
29	Ahr+/-	I	Lcn2	112.53	8
32	Ahr+/-	I	Lcn2	112.78	8
33	Ahr+/-	I	Lcn2	420.74	8
34	Ahr+/-	I	Lcn2	150.58	8
35	Ahr+/-	I	Lcn2	100.69	8
36	Ahr-/-	I	Lcn2	545.22	8
37	Ahr-/-	I	Lcn2	560.45	8
39	Ahr-/-	I	Lcn2	620.99	8
40	Ahr-/-	I	Lcn2	621.65	8
42	Ahr-/-	I	Lcn2	347.45	8
38	Ahr+/-	UI	Lcn2	2.06	8
41	Ahr+/-	UI	Lcn2	0.7	8
43	Ahr+/-	UI	Lcn2	1.26	8
55	Ahr+/-	UI	Lcn2	0.52	8
56	Ahr+/-	UI	Lcn2	1.06	8
30	Ahr-/-	UI	Lcn2	2.59	8
54	Ahr-/-	UI	Lcn2	1.26	8
57	Ahr-/-	UI	Lcn2	0.52	8
58	Ahr-/-	UI	Lcn2	0.65	8
59	Ahr-/-	UI	Lcn2	1.69	8

## Sheet: 4E
mouse	genotype	dpi	plasma heme (uM)
47	Ahr+/-	0	169.001
51	Ahr+/-	0	227.445
52	Ahr+/-	0	140.981
60	Ahr+/-	0	223.65
44	Ahr-/-	0	242.896
45	Ahr-/-	0	127.386
46	Ahr-/-	0	263.34
48	Ahr-/-	0	142.041
49	Ahr-/-	0	103.774
53	Ahr-/-	0	167.397
61	Ahr+/-	5	179.839
62	Ahr+/-	5	193.193
63	Ahr+/-	5	40.0784
64	Ahr-/-	5	193.193
65	Ahr-/-	5	155.049
66	Ahr-/-	5	231.232
1	Ahr+/-	7	644.488
6	Ahr+/-	7	410.815
7	Ahr+/-	7	522.145
14	Ahr+/-	7	430.123
15	Ahr+/-	7	409.31
67	Ahr+/-	7	144.915
68	Ahr+/-	7	144.384
71	Ahr+/-	7	127.406
2	Ahr-/-	7	532.155
11	Ahr-/-	7	548.441
16	Ahr-/-	7	576.255
22	Ahr-/-	7	571.11
31	Ahr-/-	7	417.781
69	Ahr-/-	7	142.128
70	Ahr-/-	7	246.241
72	Ahr-/-	7	318.788
29	Ahr+/-	8	278.672
32	Ahr+/-	8	356.735
33	Ahr+/-	8	175.724
34	Ahr+/-	8	343.962
35	Ahr+/-	8	164.168
78	Ahr+/-	8	696.339
79	Ahr+/-	8	227.123
80	Ahr+/-	8	396.94
81	Ahr+/-	8	525.497
82	Ahr+/-	8	201.872
36	Ahr-/-	8	1876.22
37	Ahr-/-	8	1230.18
39	Ahr-/-	8	1405.35
40	Ahr-/-	8	1114.69
42	Ahr-/-	8	777.365
73	Ahr-/-	8	2012.41
74	Ahr-/-	8	956.179
75	Ahr-/-	8	201.872
77	Ahr-/-	8	1450.29

## Sheet: 4G
mouse	genotype	dpi	urine heme (uM)
47	Ahr+/-	0	29.9921
51	Ahr+/-	0	42.5367
52	Ahr+/-	0	42.3494
60	Ahr+/-	0	29.5767
44	Ahr-/-	0	32.6579
45	Ahr-/-	0	38.7065
46	Ahr-/-	0	34.259
48	Ahr-/-	0	38.6315
49	Ahr-/-	0	37.5471
53	Ahr-/-	0	61.8568
61	Ahr+/-	5	43.7738
62	Ahr+/-	5	111.041
63	Ahr+/-	5	49.9151
64	Ahr-/-	5	101.966
65	Ahr-/-	5	36.3177
66	Ahr-/-	5	36.2549
78	Ahr+/-	6	138.249
79	Ahr+/-	6	132.92
80	Ahr+/-	6	161.187
81	Ahr+/-	6	103.576
82	Ahr+/-	6	134.224
73	Ahr-/-	6	141.291
77	Ahr-/-	6	119.698
1	Ahr+/-	7	1079.43
6	Ahr+/-	7	61.8384
14	Ahr+/-	7	38.4077
15	Ahr+/-	7	51.6307
67	Ahr+/-	7	78.8446
68	Ahr+/-	7	62.1219
71	Ahr+/-	7	147.15
78	Ahr+/-	7	105.398
79	Ahr+/-	7	125.61
80	Ahr+/-	7	116.785
81	Ahr+/-	7	121.977
82	Ahr+/-	7	125.61
2	Ahr-/-	7	33.4992
11	Ahr-/-	7	96.4539
16	Ahr-/-	7	124.442
22	Ahr-/-	7	34.6505
31	Ahr-/-	7	200.38
69	Ahr-/-	7	42.824
70	Ahr-/-	7	84.4696
72	Ahr-/-	7	82.7123
73	Ahr-/-	7	124.258
74	Ahr-/-	7	111.806
75	Ahr-/-	7	111.806
33	Ahr+/-	8	66.7049
35	Ahr+/-	8	66.8575
78	Ahr+/-	8	1273.55
79	Ahr+/-	8	67.8408
80	Ahr+/-	8	4333.45
81	Ahr+/-	8	2955.41
82	Ahr+/-	8	399.091
36	Ahr-/-	8	2915.04
37	Ahr-/-	8	2526.1
40	Ahr-/-	8	8140.89
42	Ahr-/-	8	2585.71
73	Ahr-/-	8	2641.16
74	Ahr-/-	8	1029.37
75	Ahr-/-	8	104.614
77	Ahr-/-	8	295.479
