# Supplementary material for: Metabolic profiling during malaria reveals the role of the aryl hydrocarbon receptor in regulating kidney injury
Source: eLife. 2020 Oct 6;9:e60165. doi: 10.7554/eLife.60165 (PMC7538157; doi:10.7554/eLife.60165)
Supplement: Figure 5—figure supplement 1—source data 1. [file elife-60165-fig5-figsupp1-data1.xlsx]

## Sheet: 5 supplement 1A
mouse	genotype	dpi	cell.type	cells.per.ul
1.1	Ahr-/-	0	neutrophils	1074.74
1.2	Ahr-/-	0	neutrophils	853.113
1.3	Ahr-/-	0	neutrophils	560.819
2.1	Ahr-/-	0	neutrophils	1081.4
2.2	Ahr-/-	0	neutrophils	1703.48
2.3	Ahr-/-	0	neutrophils	920.416
4.1	AhR+/+	0	neutrophils	680.806
4.2	AhR+/+	0	neutrophils	735.991
4.3	AhR+/+	0	neutrophils	634.215
5.1	AhR+/+	0	neutrophils	624.698
5.2	AhR+/+	0	neutrophils	918.384
5.3	AhR+/+	0	neutrophils	1192.63
1.1	Ahr-/-	5	neutrophils	111.688
1.2	Ahr-/-	5	neutrophils	622.429
1.3	Ahr-/-	5	neutrophils	2050.15
2.1	Ahr-/-	5	neutrophils	113.812
2.2	Ahr-/-	5	neutrophils	250.709
2.3	Ahr-/-	5	neutrophils	453.713
4.1	AhR+/+	5	neutrophils	243.078
4.2	AhR+/+	5	neutrophils	177.44
4.3	AhR+/+	5	neutrophils	260.117
5.1	AhR+/+	5	neutrophils	438.389
5.2	AhR+/+	5	neutrophils	565.304
5.3	AhR+/+	5	neutrophils	346.236
1.1	Ahr-/-	6	neutrophils	995.327
1.2	Ahr-/-	6	neutrophils	689.738
1.3	Ahr-/-	6	neutrophils	881.051
2.1	Ahr-/-	6	neutrophils	536.678
2.2	Ahr-/-	6	neutrophils	413.037
2.3	Ahr-/-	6	neutrophils	478.891
4.1	AhR+/+	6	neutrophils	121.288
4.2	AhR+/+	6	neutrophils	173.891
4.3	AhR+/+	6	neutrophils	235.756
5.1	AhR+/+	6	neutrophils	234.222
5.2	AhR+/+	6	neutrophils	362.423
5.3	AhR+/+	6	neutrophils	346.181
1.1	Ahr-/-	7	neutrophils	2382.11
1.2	Ahr-/-	7	neutrophils	2059.52
1.3	Ahr-/-	7	neutrophils	2647.85
2.1	Ahr-/-	7	neutrophils	385.014
2.2	Ahr-/-	7	neutrophils	1967.72
2.3	Ahr-/-	7	neutrophils	1493.82
4.1	AhR+/+	7	neutrophils	856.28
4.2	AhR+/+	7	neutrophils	550.797
4.3	AhR+/+	7	neutrophils	364.782
5.1	AhR+/+	7	neutrophils	368.751
5.2	AhR+/+	7	neutrophils	315.524
5.3	AhR+/+	7	neutrophils	882.741

## Sheet: 5 supplement 1C
mouse	genotype	treatment	dpi	cell.type	cells.per.ul
1.1	Ahr+/+	Ly6G	7	neutrophils	129.111
2.1	Ahr+/+	Ly6G	7	neutrophils	102.46
2.2	Ahr+/+	Ly6G	7	neutrophils	100.964
2.3	Ahr+/+	Ly6G	7	neutrophils	81.1102
2.4	Ahr+/+	Ly6G	7	neutrophils	107.907
3.1	Ahr+/+	isotype	7	neutrophils	782.598
3.2	Ahr+/+	isotype	7	neutrophils	878.003
3.3	Ahr+/+	isotype	7	neutrophils	1232.37
3.4	Ahr+/+	isotype	7	neutrophils	971.098
4.1	Ahr-/-	Ly6G	7	neutrophils	778.595
5.2	Ahr-/-	Ly6G	7	neutrophils	364.2
5.3	Ahr-/-	Ly6G	7	neutrophils	338.396
5.4	Ahr-/-	Ly6G	7	neutrophils	411.887
6.1	Ahr-/-	isotype	7	neutrophils	1756.21
6.2	Ahr-/-	isotype	7	neutrophils	3404.45
6.3	Ahr-/-	isotype	7	neutrophils	3580.18
6.4	Ahr-/-	isotype	7	neutrophils	3330.95

## Sheet: 5 supplement 1D
mouse	genotype	treatment	time	status (1 = dead)
1.1	Ahr+/+	Ly6G	13	0
2.1	Ahr+/+	Ly6G	13	0
2.2	Ahr+/+	Ly6G	13	0
2.3	Ahr+/+	Ly6G	13	0
2.4	Ahr+/+	Ly6G	13	0
3.1	Ahr+/+	isotype	13	0
3.2	Ahr+/+	isotype	13	0
3.3	Ahr+/+	isotype	13	0
3.4	Ahr+/+	isotype	13	0
4.1	Ahr-/-	Ly6G	9	1
5.2	Ahr-/-	Ly6G	12	1
5.3	Ahr-/-	Ly6G	10	1
5.4	Ahr-/-	Ly6G	13	1
6.1	Ahr-/-	isotype	11	1
6.2	Ahr-/-	isotype	11	1
6.3	Ahr-/-	isotype	9	1
6.4	Ahr-/-	isotype	9	1
