# Supplementary material for: Metabolic profiling during malaria reveals the role of the aryl hydrocarbon receptor in regulating kidney injury
Source: eLife. 2020 Oct 6;9:e60165. doi: 10.7554/eLife.60165 (PMC7538157; doi:10.7554/eLife.60165)
Supplement: Figure 5—figure supplement 2—source data 1. [file elife-60165-fig5-figsupp2-data1.xlsx]

## Sheet: 5 supplement 2A
mouse	genotype	day	TNF concentration (pg/ml)
29	Ahr+/-	8 DPI	70.6807
32	Ahr+/-	8 DPI	47.1445
33	Ahr+/-	8 DPI	41.0746
34	Ahr+/-	8 DPI	22.3866
35	Ahr+/-	8 DPI	22.7778
37	Ahr-/-	8 DPI	65.848
39	Ahr-/-	8 DPI	67.4841
40	Ahr-/-	8 DPI	74.172

## Sheet: 5 supplement 2B
mouse	genotype	treatment	time	status (1 = dead)
13	Ahr-/-	anti-TNF	9	1
15	Ahr-/-	anti-TNF	11	1
16	Ahr-/-	anti-TNF	10	1
18	Ahr-/-	anti-TNF	10	1
19	Ahr-/-	anti-TNF	9	1
11	Ahr-/-	isotype	11	1
12	Ahr-/-	isotype	10	1
14	Ahr-/-	isotype	11	1
17	Ahr-/-	isotype	10	1
6	Ahr+/-	anti-TNF	11	0
7	Ahr+/-	anti-TNF	9	1
8	Ahr+/-	anti-TNF	11	0
9	Ahr+/-	anti-TNF	11	0
10	Ahr+/-	anti-TNF	11	0
1	Ahr+/-	isotype	11	0
2	Ahr+/-	isotype	11	0
3	Ahr+/-	isotype	11	0
4	Ahr+/-	isotype	11	0
5	Ahr+/-	isotype	11	0

## Sheet: 5 supplement 2C
mouse	genotype	treatment	dpi	BUN (mg/dL)
13	Ahr-/-	anti-TNF	0	33.6163
15	Ahr-/-	anti-TNF	0	42.1053
16	Ahr-/-	anti-TNF	0	41.7657
18	Ahr-/-	anti-TNF	0	46.8591
19	Ahr-/-	anti-TNF	0	46.5195
11	Ahr-/-	isotype	0	45.8404
12	Ahr-/-	isotype	0	45.5008
14	Ahr-/-	isotype	0	44.4822
17	Ahr-/-	isotype	0	37.691
6	Ahr+/-	anti-TNF	0	57.725
7	Ahr+/-	anti-TNF	0	54.3294
8	Ahr+/-	anti-TNF	0	51.2733
9	Ahr+/-	anti-TNF	0	59.4228
10	Ahr+/-	anti-TNF	0	51.6129
1	Ahr+/-	isotype	0	58.7436
2	Ahr+/-	isotype	0	53.6503
3	Ahr+/-	isotype	0	73.6842
4	Ahr+/-	isotype	0	51.2733
5	Ahr+/-	isotype	0	41.4261
13	Ahr-/-	anti-TNF	7	287.764
15	Ahr-/-	anti-TNF	7	266.385
16	Ahr-/-	anti-TNF	7	210.408
18	Ahr-/-	anti-TNF	7	301.828
19	Ahr-/-	anti-TNF	7	329.395
11	Ahr-/-	isotype	7	214.627
12	Ahr-/-	isotype	7	261.603
14	Ahr-/-	isotype	7	246.414
17	Ahr-/-	isotype	7	291.139
6	Ahr+/-	anti-TNF	7	93.1083
7	Ahr+/-	anti-TNF	7	180.028
8	Ahr+/-	anti-TNF	7	51.4768
9	Ahr+/-	anti-TNF	7	73.4177
10	Ahr+/-	anti-TNF	7	64.135
1	Ahr+/-	isotype	7	71.1674
2	Ahr+/-	isotype	7	34.0366
3	Ahr+/-	isotype	7	30.9423
4	Ahr+/-	isotype	7	29.5359
5	Ahr+/-	isotype	7	43.8819
13	Ahr-/-	anti-TNF	8	760.9
15	Ahr-/-	anti-TNF	8	401.547
16	Ahr-/-	anti-TNF	8	165.26
18	Ahr-/-	anti-TNF	8	623.769
19	Ahr-/-	anti-TNF	8	734.177
11	Ahr-/-	isotype	8	287.623
12	Ahr-/-	isotype	8	795.359
14	Ahr-/-	isotype	8	251.758
17	Ahr-/-	isotype	8	489.451
6	Ahr+/-	anti-TNF	8	108.298
7	Ahr+/-	anti-TNF	8	177.215
8	Ahr+/-	anti-TNF	8	100.563
9	Ahr+/-	anti-TNF	8	89.3108
10	Ahr+/-	anti-TNF	8	93.5302
1	Ahr+/-	isotype	8	118.847
2	Ahr+/-	isotype	8	162.447
3	Ahr+/-	isotype	8	174.402
4	Ahr+/-	isotype	8	241.21
5	Ahr+/-	isotype	8	94.2335
