# Supplementary material for: Metabolic profiling during malaria reveals the role of the aryl hydrocarbon receptor in regulating kidney injury
Source: eLife. 2020 Oct 6;9:e60165. doi: 10.7554/eLife.60165 (PMC7538157; doi:10.7554/eLife.60165)
Supplement: Figure 5—figure supplement 3—source data 1. [file elife-60165-fig5-figsupp3-data1.xlsx]

## Sheet: 5 supplement 3
mouse	genotype	variable	percent donor genotype
53	+ -> +	NK cells	92.048
54	+ -> +	NK cells	93.977
55	+ -> +	NK cells	91.8851
56	+ -> +	NK cells	93.7682
57	+ -> +	NK cells	89.1223
58	+ -> +	NK cells	90.2557
59	+ -> +	NK cells	93.8761
60	+ -> +	NK cells	93.7159
61	+ -> +	NK cells	94.1634
62	+ -> +	NK cells	87.6073
63	- -> +	NK cells	87.5679
64	- -> +	NK cells	92.3041
65	- -> +	NK cells	86.102
66	- -> +	NK cells	94.0574
67	- -> +	NK cells	90.5927
68	- -> +	NK cells	93.3225
69	- -> +	NK cells	91.5718
70	- -> +	NK cells	94.352
71	- -> +	NK cells	91.0752
72	- -> +	NK cells	90.4701
73	+ -> -	NK cells	92.3453
74	+ -> -	NK cells	84.6595
75	+ -> -	NK cells	90.3335
76	+ -> -	NK cells	89.6184
77	+ -> -	NK cells	92.4779
78	+ -> -	NK cells	96.1126
79	- -> -	NK cells	99.5885
80	- -> -	NK cells	99.5109
81	- -> -	NK cells	99.4248
82	- -> -	NK cells	98.6272
83	- -> -	NK cells	99.2694
84	- -> -	NK cells	99.3041
85	- -> -	NK cells	98.4173
53	+ -> +	monocytes	92.3333
54	+ -> +	monocytes	93.871
55	+ -> +	monocytes	92.4378
56	+ -> +	monocytes	94.5482
57	+ -> +	monocytes	95.3199
58	+ -> +	monocytes	93.8182
59	+ -> +	monocytes	94.5257
60	+ -> +	monocytes	87.7414
61	+ -> +	monocytes	96.9697
62	+ -> +	monocytes	86.0971
63	- -> +	monocytes	96.8296
64	- -> +	monocytes	93.82
65	- -> +	monocytes	96.9114
66	- -> +	monocytes	94.5813
67	- -> +	monocytes	95.5366
68	- -> +	monocytes	94.9358
69	- -> +	monocytes	95.7716
70	- -> +	monocytes	95.5096
71	- -> +	monocytes	95.2436
72	- -> +	monocytes	96.1762
73	+ -> -	monocytes	95.1415
74	+ -> -	monocytes	95.4808
75	+ -> -	monocytes	92.7444
76	+ -> -	monocytes	96.9189
77	+ -> -	monocytes	93.0999
78	+ -> -	monocytes	93.8917
79	- -> -	monocytes	99.4649
80	- -> -	monocytes	99.5044
81	- -> -	monocytes	99.5372
82	- -> -	monocytes	99.3535
83	- -> -	monocytes	99.6244
84	- -> -	monocytes	99.5747
85	- -> -	monocytes	98.845
53	+ -> +	neutrophils	99.7575
54	+ -> +	neutrophils	98.829
55	+ -> +	neutrophils	99.8337
56	+ -> +	neutrophils	99.8129
57	+ -> +	neutrophils	99.8949
58	+ -> +	neutrophils	99.8756
59	+ -> +	neutrophils	99.8559
60	+ -> +	neutrophils	99.8803
61	+ -> +	neutrophils	99.8544
62	+ -> +	neutrophils	91.4741
63	- -> +	neutrophils	99.2871
64	- -> +	neutrophils	99.1639
65	- -> +	neutrophils	99.8042
66	- -> +	neutrophils	99.8944
67	- -> +	neutrophils	99.4418
68	- -> +	neutrophils	98.1959
69	- -> +	neutrophils	99.6531
70	- -> +	neutrophils	99.944
71	- -> +	neutrophils	96.5768
72	- -> +	neutrophils	98.9822
73	+ -> -	neutrophils	99.4754
74	+ -> -	neutrophils	99.6805
75	+ -> -	neutrophils	97.7651
76	+ -> -	neutrophils	99.8993
77	+ -> -	neutrophils	99.4737
78	+ -> -	neutrophils	99.8634
79	- -> -	neutrophils	99.8397
80	- -> -	neutrophils	99.9034
81	- -> -	neutrophils	99.8368
82	- -> -	neutrophils	99.7396
83	- -> -	neutrophils	99.8592
84	- -> -	neutrophils	99.8609
85	- -> -	neutrophils	99.7323
53	+ -> +	B cells	99.6561
54	+ -> +	B cells	99.5395
55	+ -> +	B cells	99.4687
56	+ -> +	B cells	99.7057
57	+ -> +	B cells	99.718
58	+ -> +	B cells	99.6169
59	+ -> +	B cells	99.7025
60	+ -> +	B cells	99.0491
61	+ -> +	B cells	99.7205
62	+ -> +	B cells	99.4964
63	- -> +	B cells	99.6384
64	- -> +	B cells	99.5646
65	- -> +	B cells	99.7094
66	- -> +	B cells	99.0297
67	- -> +	B cells	98.7105
68	- -> +	B cells	99.554
69	- -> +	B cells	99.443
70	- -> +	B cells	99.4243
71	- -> +	B cells	99.6475
72	- -> +	B cells	96.8318
73	+ -> -	B cells	99.7433
74	+ -> -	B cells	99.7989
75	+ -> -	B cells	98.6631
76	+ -> -	B cells	99.7644
77	+ -> -	B cells	99.7461
78	+ -> -	B cells	99.7858
79	- -> -	B cells	99.8698
80	- -> -	B cells	99.8497
81	- -> -	B cells	99.8791
82	- -> -	B cells	99.886
83	- -> -	B cells	99.8551
84	- -> -	B cells	99.8522
85	- -> -	B cells	99.7962
53	+ -> +	T cells	74.8252
54	+ -> +	T cells	80.0189
55	+ -> +	T cells	74.4616
56	+ -> +	T cells	85.8251
57	+ -> +	T cells	80.8678
58	+ -> +	T cells	79.6246
59	+ -> +	T cells	75.9995
60	+ -> +	T cells	76.9622
61	+ -> +	T cells	81.1631
62	+ -> +	T cells	75.8455
63	- -> +	T cells	73.4954
64	- -> +	T cells	77.4284
65	- -> +	T cells	73.6317
66	- -> +	T cells	73.0136
67	- -> +	T cells	74.2104
68	- -> +	T cells	75.6582
69	- -> +	T cells	71.5035
70	- -> +	T cells	73.3044
71	- -> +	T cells	74.3933
72	- -> +	T cells	77.6868
73	+ -> -	T cells	51.2714
74	+ -> -	T cells	59.0354
75	+ -> -	T cells	62.4497
76	+ -> -	T cells	61.889
77	+ -> -	T cells	67.4258
78	+ -> -	T cells	76.3679
79	- -> -	T cells	99.8919
80	- -> -	T cells	99.8106
81	- -> -	T cells	99.8316
82	- -> -	T cells	99.8594
83	- -> -	T cells	99.9201
84	- -> -	T cells	99.848
85	- -> -	T cells	99.0316
