# Supplementary material for: Metabolic profiling during malaria reveals the role of the aryl hydrocarbon receptor in regulating kidney injury
Source: eLife. 2020 Oct 6;9:e60165. doi: 10.7554/eLife.60165 (PMC7538157; doi:10.7554/eLife.60165)
Supplement: Figure 5—source data 1. [file elife-60165-fig5-data1.xlsx]

## Sheet: 5A
mouse	genotype	time	status (1 = dead)
53	+ -> +	12	1
54	+ -> +	15	0
55	+ -> +	15	0
56	+ -> +	15	0
57	+ -> +	15	0
58	+ -> +	15	0
59	+ -> +	15	0
60	+ -> +	9	1
61	+ -> +	15	0
62	+ -> +	9	1
63	- -> +	15	0
64	- -> +	15	0
65	- -> +	15	0
66	- -> +	15	0
67	- -> +	15	0
68	- -> +	15	0
69	- -> +	15	0
70	- -> +	15	0
71	- -> +	15	0
72	- -> +	15	0
73	+ -> -	10	1
74	+ -> -	11	1
75	+ -> -	10	1
76	+ -> -	11	1
77	+ -> -	9	1
78	+ -> -	10	1
79	- -> -	9	1
80	- -> -	9	1
81	- -> -	9	1
82	- -> -	11	1
83	- -> -	10	1
84	- -> -	9	1
85	- -> -	11	1

## Sheet: 5B
mouse	genotype	day	percent.parasitemia
53	+ -> +	0	0
54	+ -> +	0	0
55	+ -> +	0	0
56	+ -> +	0	0
57	+ -> +	0	0
58	+ -> +	0	0
59	+ -> +	0	0
60	+ -> +	0	0
61	+ -> +	0	0
62	+ -> +	0	0
63	- -> +	0	0
64	- -> +	0	0
65	- -> +	0	0
66	- -> +	0	0
67	- -> +	0	0
68	- -> +	0	0
69	- -> +	0	0
70	- -> +	0	0
71	- -> +	0	0
72	- -> +	0	0
73	+ -> -	0	0
74	+ -> -	0	0
75	+ -> -	0	0
76	+ -> -	0	0
77	+ -> -	0	0
78	+ -> -	0	0
79	- -> -	0	0
80	- -> -	0	0
81	- -> -	0	0
82	- -> -	0	0
83	- -> -	0	0
84	- -> -	0	0
85	- -> -	0	0
53	+ -> +	5	0.0242131
54	+ -> +	5	0.00934579
55	+ -> +	5	0.0223214
56	+ -> +	5	0.049763
57	+ -> +	5	0.0113636
58	+ -> +	5	0.0244444
59	+ -> +	5	0
60	+ -> +	5	0.0807453
61	+ -> +	5	0.0305011
62	+ -> +	5	0.0478261
63	- -> +	5	0.0179372
64	- -> +	5	0.0134228
65	- -> +	5	0.0302376
66	- -> +	5	0.0447427
67	- -> +	5	0.0087146
68	- -> +	5	0.0193133
69	- -> +	5	0.0177384
70	- -> +	5	0.0177778
71	- -> +	5	0.0143149
72	- -> +	5	0.0138889
73	+ -> -	5	0.0382883
74	+ -> -	5	0.0535332
75	+ -> -	5	0.037037
76	+ -> -	5	0.0696203
77	+ -> -	5	0.0659574
78	+ -> -	5	0.0684647
79	- -> -	5	0.038961
80	- -> -	5	0.0436782
81	- -> -	5	0.11479
82	- -> -	5	0.0517241
83	- -> -	5	0.0995475
84	- -> -	5	0.0629213
85	- -> -	5	0.0718954
53	+ -> +	6	0.0763209
54	+ -> +	6	0.0552147
55	+ -> +	6	0.0989474
56	+ -> +	6	0.129252
57	+ -> +	6	0.062645
58	+ -> +	6	0.0824053
59	+ -> +	6	0.0502183
60	+ -> +	6	0.209639
61	+ -> +	6	0.0948617
62	+ -> +	6	0.169421
63	- -> +	6	0.0602151
64	- -> +	6	0.0571429
65	- -> +	6	0.0484988
66	- -> +	6	0.0835322
67	- -> +	6	0.0576497
68	- -> +	6	0.0565611
69	- -> +	6	0.104854
70	- -> +	6	0.0612245
71	- -> +	6	0.0619658
72	- -> +	6	0.0581897
73	+ -> -	6	0.148707
74	+ -> -	6	0.167816
75	+ -> -	6	0.246753
76	+ -> -	6	0.241304
77	+ -> -	6	0.21087
78	+ -> -	6	0.126386
79	- -> -	6	0.174737
80	- -> -	6	0.241685
81	- -> -	6	0.263158
82	- -> -	6	0.164905
83	- -> -	6	0.204598
84	- -> -	6	0.150812
85	- -> -	6	0.227074
53	+ -> +	7	0.217021
54	+ -> +	7	0.170635
55	+ -> +	7	0.213552
56	+ -> +	7	0.269406
57	+ -> +	7	0.192478
58	+ -> +	7	0.185897
59	+ -> +	7	0.149321
60	+ -> +	7	0.313953
61	+ -> +	7	0.234496
62	+ -> +	7	0.340426
63	- -> +	7	0.196305
64	- -> +	7	0.15
65	- -> +	7	0.17226
66	- -> +	7	0.232759
67	- -> +	7	0.181609
68	- -> +	7	0.172043
69	- -> +	7	0.13245
70	- -> +	7	0.15528
71	- -> +	7	0.138655
72	- -> +	7	0.176715
73	+ -> -	7	0.328638
74	+ -> -	7	0.341629
75	+ -> -	7	0.33713
76	+ -> -	7	0.466042
77	+ -> -	7	0.389016
78	+ -> -	7	0.24594
79	- -> -	7	0.345339
80	- -> -	7	0.401786
81	- -> -	7	0.506757
82	- -> -	7	0.316159
83	- -> -	7	0.352174
84	- -> -	7	0.387234
85	- -> -	7	0.362473
53	+ -> +	8	0.196507
54	+ -> +	8	0.225941
55	+ -> +	8	0.226306
56	+ -> +	8	0.102222
57	+ -> +	8	0.221983
58	+ -> +	8	0.0931264
59	+ -> +	8	0.197309
60	+ -> +	8	0.187919
61	+ -> +	8	0.178261
62	+ -> +	8	0.1678
63	- -> +	8	0.306998
64	- -> +	8	0.253304
65	- -> +	8	0.264916
66	- -> +	8	0.013544
67	- -> +	8	0.217865
68	- -> +	8	0.229039
69	- -> +	8	0.242888
70	- -> +	8	0.137168
71	- -> +	8	0.257075
72	- -> +	8	0.123667
73	+ -> -	8	0.342404
74	+ -> -	8	0.418182
75	+ -> -	8	0.270153
76	+ -> -	8	0.300469
77	+ -> -	8	0.414687
78	+ -> -	8	0.36891
79	- -> -	8	0.341573
80	- -> -	8	0.359823
81	- -> -	8	0.378076
82	- -> -	8	0.27991
83	- -> -	8	0.357143
84	- -> -	8	0.38961
85	- -> -	8	0.355649
53	+ -> +	9	0.147368
54	+ -> +	9	0.297436
55	+ -> +	9	0.196078
56	+ -> +	9	0.041841
57	+ -> +	9	0.130612
58	+ -> +	9	0.0214592
59	+ -> +	9	0.1
60	+ -> +	9	NA
61	+ -> +	9	0.0616016
62	+ -> +	9	NA
63	- -> +	9	0.0387755
64	- -> +	9	0.19181
65	- -> +	9	0.132251
66	- -> +	9	0.010142
67	- -> +	9	0.0915332
68	- -> +	9	0.0633188
69	- -> +	9	0.0521739
70	- -> +	9	0.0165631
71	- -> +	9	0.108974
72	- -> +	9	0.124717
73	+ -> -	9	0.365688
74	+ -> -	9	0.359914
75	+ -> -	9	0.414118
76	+ -> -	9	0.354486
77	+ -> -	9	NA
78	+ -> -	9	0.498807
79	- -> -	9	NA
80	- -> -	9	NA
81	- -> -	9	NA
82	- -> -	9	0.360382
83	- -> -	9	0.418764
84	- -> -	9	NA
85	- -> -	9	0.35123
53	+ -> +	10	0.204691
54	+ -> +	10	0.0310078
55	+ -> +	10	0.195122
56	+ -> +	10	0.0153846
57	+ -> +	10	0.0700935
58	+ -> +	10	0.00863931
59	+ -> +	10	0.00875274
60	+ -> +	10	NA
61	+ -> +	10	0.00657895
62	+ -> +	10	NA
63	- -> +	10	0.0439815
64	- -> +	10	0.0448065
65	- -> +	10	0.0311005
66	- -> +	10	0.0114416
67	- -> +	10	0.119512
68	- -> +	10	0.0384615
69	- -> +	10	0.00659341
70	- -> +	10	0.00583658
71	- -> +	10	0.0646552
72	- -> +	10	0.0748299
73	+ -> -	10	NA
74	+ -> -	10	0.339713
75	+ -> -	10	NA
76	+ -> -	10	0.145055
77	+ -> -	10	NA
78	+ -> -	10	NA
79	- -> -	10	NA
80	- -> -	10	NA
81	- -> -	10	NA
82	- -> -	10	0.277251
83	- -> -	10	NA
84	- -> -	10	NA
85	- -> -	10	0.255014
53	+ -> +	11	0.154812
54	+ -> +	11	0.0189474
55	+ -> +	11	0.118026
56	+ -> +	11	0.004662
57	+ -> +	11	0.039627
58	+ -> +	11	0.00452489
59	+ -> +	11	0.00475059
60	+ -> +	11	NA
61	+ -> +	11	0.00229358
62	+ -> +	11	NA
63	- -> +	11	0.0263736
64	- -> +	11	0.0116009
65	- -> +	11	0.0169851
66	- -> +	11	0.00938967
67	- -> +	11	0.103926
68	- -> +	11	0.00220751
69	- -> +	11	0
70	- -> +	11	0
71	- -> +	11	0.0469799
72	- -> +	11	0.0480549
73	+ -> -	11	NA
74	+ -> -	11	NA
75	+ -> -	11	NA
76	+ -> -	11	NA
77	+ -> -	11	NA
78	+ -> -	11	NA
79	- -> -	11	NA
80	- -> -	11	NA
81	- -> -	11	NA
82	- -> -	11	NA
83	- -> -	11	NA
84	- -> -	11	NA
85	- -> -	11	NA
53	+ -> +	12	NA
54	+ -> +	12	0.0115741
55	+ -> +	12	0.0460829
56	+ -> +	12	0.00231481
57	+ -> +	12	0.0272109
58	+ -> +	12	0
59	+ -> +	12	0.00456621
60	+ -> +	12	NA
61	+ -> +	12	0
62	+ -> +	12	NA
63	- -> +	12	0.02407
64	- -> +	12	0.00674157
65	- -> +	12	0
66	- -> +	12	0
67	- -> +	12	0.0253456
68	- -> +	12	0.00218341
69	- -> +	12	0.0021097
70	- -> +	12	0.00471698
71	- -> +	12	0.00229885
72	- -> +	12	0.0453608
73	+ -> -	12	NA
74	+ -> -	12	NA
75	+ -> -	12	NA
76	+ -> -	12	NA
77	+ -> -	12	NA
78	+ -> -	12	NA
79	- -> -	12	NA
80	- -> -	12	NA
81	- -> -	12	NA
82	- -> -	12	NA
83	- -> -	12	NA
84	- -> -	12	NA
85	- -> -	12	NA
53	+ -> +	13	NA
54	+ -> +	13	0.00223714
55	+ -> +	13	0.0113122
56	+ -> +	13	0.00469484
57	+ -> +	13	0.00221729
58	+ -> +	13	0
59	+ -> +	13	0
60	+ -> +	13	NA
61	+ -> +	13	0
62	+ -> +	13	NA
63	- -> +	13	0
64	- -> +	13	0.00230947
65	- -> +	13	0
66	- -> +	13	0.00674157
67	- -> +	13	0.004662
68	- -> +	13	0.00238095
69	- -> +	13	0.00239808
70	- -> +	13	0
71	- -> +	13	0.00218341
72	- -> +	13	0.0204082
73	+ -> -	13	NA
74	+ -> -	13	NA
75	+ -> -	13	NA
76	+ -> -	13	NA
77	+ -> -	13	NA
78	+ -> -	13	NA
79	- -> -	13	NA
80	- -> -	13	NA
81	- -> -	13	NA
82	- -> -	13	NA
83	- -> -	13	NA
84	- -> -	13	NA
85	- -> -	13	NA
53	+ -> +	14	NA
54	+ -> +	14	0.00225734
55	+ -> +	14	0.00470588
56	+ -> +	14	0.00455581
57	+ -> +	14	0
58	+ -> +	14	0
59	+ -> +	14	0
60	+ -> +	14	NA
61	+ -> +	14	0
62	+ -> +	14	NA
63	- -> +	14	0.00423729
64	- -> +	14	0.00228311
65	- -> +	14	0
66	- -> +	14	0.0258216
67	- -> +	14	0.00663717
68	- -> +	14	0.0166271
69	- -> +	14	0.0113122
70	- -> +	14	0.00869565
71	- -> +	14	0.00223214
72	- -> +	14	0.0152838
73	+ -> -	14	NA
74	+ -> -	14	NA
75	+ -> -	14	NA
76	+ -> -	14	NA
77	+ -> -	14	NA
78	+ -> -	14	NA
79	- -> -	14	NA
80	- -> -	14	NA
81	- -> -	14	NA
82	- -> -	14	NA
83	- -> -	14	NA
84	- -> -	14	NA
85	- -> -	14	NA
53	+ -> +	15	NA
54	+ -> +	15	0.00634249
55	+ -> +	15	0.00228311
56	+ -> +	15	0.0166667
57	+ -> +	15	0.00947867
58	+ -> +	15	0.00225225
59	+ -> +	15	0
60	+ -> +	15	NA
61	+ -> +	15	0.00192308
62	+ -> +	15	NA
63	- -> +	15	0.0101215
64	- -> +	15	0.0045045
65	- -> +	15	0.00590551
66	- -> +	15	0.0243363
67	- -> +	15	0.0128205
68	- -> +	15	0.0235294
69	- -> +	15	0.028866
70	- -> +	15	0.0210526
71	- -> +	15	0.00445434
72	- -> +	15	0.0413793
73	+ -> -	15	NA
74	+ -> -	15	NA
75	+ -> -	15	NA
76	+ -> -	15	NA
77	+ -> -	15	NA
78	+ -> -	15	NA
79	- -> -	15	NA
80	- -> -	15	NA
81	- -> -	15	NA
82	- -> -	15	NA
83	- -> -	15	NA
84	- -> -	15	NA
85	- -> -	15	NA

## Sheet: 5C
mouse	genotype	dpi	heme (uM)
54	+ -> +	0	369.468
55	+ -> +	0	237.681
56	+ -> +	0	193.752
62	+ -> +	0	215.716
63	- -> +	0	270.628
64	- -> +	0	424.38
68	- -> +	0	402.415
69	- -> +	0	369.468
70	- -> +	0	523.221
71	- -> +	0	204.734
75	+ -> -	0	204.734
76	+ -> -	0	698.937
77	+ -> -	0	402.415
78	+ -> -	0	600.097
79	- -> -	0	347.504
80	- -> -	0	391.433
81	- -> -	0	380.451
82	- -> -	0	545.185
83	- -> -	0	204.734
84	- -> -	0	149.822
85	- -> -	0	204.734
58	+ -> +	0	302.927
59	+ -> +	0	291.655
61	+ -> +	0	167.661
66	- -> +	0	269.111
67	- -> +	0	359.289
73	+ -> -	0	224.022
74	+ -> -	0	246.566
53	+ -> +	0	99.373
57	+ -> +	0	335.353
72	- -> +	0	63.976
78	+ -> -	9	800.076
82	- -> -	9	223.059
83	- -> -	9	411.473
85	- -> -	9	199.508
53	+ -> +	7	175.956
54	+ -> +	7	199.508
55	+ -> +	7	199.508
56	+ -> +	7	234.835
57	+ -> +	7	117.077
58	+ -> +	7	105.301
59	+ -> +	7	140.628
60	+ -> +	7	1059.14
61	+ -> +	7	164.18
62	+ -> +	7	164.18
63	- -> +	7	423.249
64	- -> +	7	387.921
65	- -> +	7	281.939
66	- -> +	7	152.404
67	- -> +	7	399.697
68	- -> +	7	93.5251
69	- -> +	7	175.956
70	- -> +	7	140.628
71	- -> +	7	223.059
72	- -> +	7	305.49
73	+ -> -	7	258.387
74	+ -> -	7	258.387
75	+ -> -	7	717.645
76	+ -> -	7	482.128
77	+ -> -	7	941.386
78	+ -> -	7	81.7492
79	- -> -	7	340.818
80	- -> -	7	517.455
81	- -> -	7	811.852
82	- -> -	7	293.714
83	- -> -	7	623.438
84	- -> -	7	682.317
85	- -> -	7	376.145
53	+ -> +	8	694.093
54	+ -> +	8	281.939
55	+ -> +	8	564.559
56	+ -> +	8	882.507
57	+ -> +	8	435.025
58	+ -> +	8	387.921
59	+ -> +	8	270.163
60	+ -> +	8	611.662
61	+ -> +	8	599.886
62	+ -> +	8	493.904
63	- -> +	8	270.163
64	- -> +	8	529.231
65	- -> +	8	423.249
66	- -> +	8	246.611
67	- -> +	8	517.455
68	- -> +	8	234.835
69	- -> +	8	223.059
70	- -> +	8	223.059
71	- -> +	8	164.18
72	- -> +	8	517.455
73	+ -> -	8	929.61
74	+ -> -	8	1306.44
75	+ -> -	8	611.662
76	+ -> -	8	729.421
77	+ -> -	8	1200.45
78	+ -> -	8	1377.09
79	- -> -	8	1388.87
80	- -> -	8	1212.23
81	- -> -	8	847.179
82	- -> -	8	1506.63
83	- -> -	8	1471.3
84	- -> -	8	1836.35
85	- -> -	8	1589.06
53	+ -> +	9	423.249
54	+ -> +	9	458.576
55	+ -> +	9	435.025
56	+ -> +	9	175.956
57	+ -> +	9	470.352
58	+ -> +	9	128.853
59	+ -> +	9	670.541
61	+ -> +	9	211.284
63	- -> +	9	717.645
64	- -> +	9	658.766
65	- -> +	9	858.955
66	- -> +	9	58.1975
67	- -> +	9	517.455
68	- -> +	9	529.231

## Sheet: 5D
mouse	genotype	dpi	BUN (mg/dL)
53	+ -> +	0	51.255
54	+ -> +	0	62.6156
55	+ -> +	0	70.5416
56	+ -> +	0	56.2748
57	+ -> +	0	44.9141
58	+ -> +	0	39.3659
59	+ -> +	0	44.1215
60	+ -> +	0	50.9908
61	+ -> +	0	56.2748
62	+ -> +	0	36.9881
63	- -> +	0	56.8032
64	- -> +	0	48.6129
65	- -> +	0	54.1612
66	- -> +	0	44.9141
67	- -> +	0	58.6526
68	- -> +	0	61.2946
69	- -> +	0	47.2919
70	- -> +	0	43.3289
71	- -> +	0	59.9736
72	- -> +	0	58.9168
73	+ -> -	0	50.1982
74	+ -> -	0	40.9511
75	+ -> -	0	31.9683
76	+ -> -	0	47.5561
77	+ -> -	0	43.0647
78	+ -> -	0	44.3857
79	- -> -	0	40.6869
80	- -> -	0	41.7437
81	- -> -	0	51.255
82	- -> -	0	43.3289
83	- -> -	0	46.4993
84	- -> -	0	47.2919
85	- -> -	0	36.9881
53	+ -> +	7	32.7354
54	+ -> +	7	40.3587
55	+ -> +	7	69.9552
56	+ -> +	7	96.4126
57	+ -> +	7	78.4753
58	+ -> +	7	85.6502
59	+ -> +	7	42.1525
60	+ -> +	7	161.883
61	+ -> +	7	73.0942
62	+ -> +	7	81.6143
63	- -> +	7	60.0897
64	- -> +	7	50.6726
65	- -> +	7	53.3632
66	- -> +	7	78.4753
67	- -> +	7	57.3991
68	- -> +	7	38.565
69	- -> +	7	69.0583
70	- -> +	7	54.7085
71	- -> +	7	48.8789
72	- -> +	7	104.933
73	+ -> -	7	141.256
74	+ -> -	7	210.314
75	+ -> -	7	181.614
76	+ -> -	7	129.148
77	+ -> -	7	185.65
78	+ -> -	7	73.991
79	- -> -	7	223.318
80	- -> -	7	229.148
81	- -> -	7	345.74
82	- -> -	7	185.65
83	- -> -	7	227.354
84	- -> -	7	378.475
85	- -> -	7	101.345
53	+ -> +	8	114.35
54	+ -> +	8	107.175
55	+ -> +	8	116.592
56	+ -> +	8	122.422
57	+ -> +	8	130.045
58	+ -> +	8	123.318
59	+ -> +	8	115.695
60	+ -> +	8	171.749
61	+ -> +	8	100
62	+ -> +	8	128.7
63	- -> +	8	148.43
64	- -> +	8	110.314
65	- -> +	8	93.2735
66	- -> +	8	160.09
67	- -> +	8	106.278
68	- -> +	8	76.6816
69	- -> +	8	93.2735
70	- -> +	8	87.8924
71	- -> +	8	76.6816
72	- -> +	8	248.879
73	+ -> -	8	356.502
74	+ -> -	8	508.221
75	+ -> -	8	391.629
76	+ -> -	8	184.604
77	+ -> -	8	434.23
78	+ -> -	8	421.525
79	- -> -	8	575.486
80	- -> -	8	508.221
81	- -> -	8	579.223
82	- -> -	8	381.166
83	- -> -	8	359.492
84	- -> -	8	618.834
85	- -> -	8	239.163
53	+ -> +	9	90.583
54	+ -> +	9	112.108
55	+ -> +	9	98.2063
56	+ -> +	9	54.2601
57	+ -> +	9	135.426
58	+ -> +	9	77.13
59	+ -> +	9	92.3767
61	+ -> +	9	71.3004
63	- -> +	9	172.197
64	- -> +	9	106.726
65	- -> +	9	104.484
66	- -> +	9	34.5291
67	- -> +	9	102.691
68	- -> +	9	114.798
69	- -> +	9	78.9238
70	- -> +	9	45.7399
71	- -> +	9	118.834
72	- -> +	9	262.78
73	+ -> -	9	568.012
74	+ -> -	9	698.804
75	+ -> -	9	594.17
76	+ -> -	9	338.565
78	+ -> -	9	562.033
82	- -> -	9	514.948
83	- -> -	9	537.369
85	- -> -	9	427.504
