# Supplementary material for: Metabolic profiling during malaria reveals the role of the aryl hydrocarbon receptor in regulating kidney injury
Source: eLife. 2020 Oct 6;9:e60165. doi: 10.7554/eLife.60165 (PMC7538157; doi:10.7554/eLife.60165)
Supplement: Figure 6—source data 1. [file elife-60165-fig6-data1.xlsx]

## Sheet: 6A
mouse	genotype	time	status (1 = dead)
1	Ahrfl/fl	9	1
2	Ahrfl/fl	15	0
3	Ahrfl/fl	15	0
4	Ahrfl/fl	10	1
5	Ahrfl/fl	15	0
6	Ahrfl/fl	15	0
7	Ahrfl/fl	15	0
8	Ahrfl/fl	10	1
9	Ahrfl/fl	15	0
10	Ahrfl/fl Tekcre/+	12	1
11	Ahrfl/fl Tekcre/+	9	1
12	Ahrfl/fl Tekcre/+	8	1
13	Ahrfl/fl Tekcre/+	9	1
14	Ahrfl/fl Tekcre/+	11	1
15	Ahrfl/fl Tekcre/+	10	1
16	Ahrfl/fl Tekcre/+	9	1
17	Ahrfl/fl Tekcre/+	9	1
18	Ahrfl/fl Tekcre/+	9	1

## Sheet: 6B
mouse	dpi	genotype	percent.parasitemia
1	0	Ahrfl/fl	0
1	5	Ahrfl/fl	0.123932
1	6	Ahrfl/fl	0.348315
1	7	Ahrfl/fl	0.383529
1	8	Ahrfl/fl	0.231263
1	9	Ahrfl/fl	NA
1	10	Ahrfl/fl	NA
1	11	Ahrfl/fl	NA
1	12	Ahrfl/fl	NA
1	13	Ahrfl/fl	NA
1	14	Ahrfl/fl	NA
1	15	Ahrfl/fl	NA
2	0	Ahrfl/fl	0
2	5	Ahrfl/fl	0.0347222
2	6	Ahrfl/fl	0.105263
2	7	Ahrfl/fl	0.251131
2	8	Ahrfl/fl	0.269316
2	9	Ahrfl/fl	0.148148
2	10	Ahrfl/fl	0.125828
2	11	Ahrfl/fl	0.0425963
2	12	Ahrfl/fl	0.00421941
2	13	Ahrfl/fl	0
2	14	Ahrfl/fl	0
2	15	Ahrfl/fl	0
3	0	Ahrfl/fl	0
3	5	Ahrfl/fl	0.0452489
3	6	Ahrfl/fl	0.214602
3	7	Ahrfl/fl	0.286713
3	8	Ahrfl/fl	0.202479
3	9	Ahrfl/fl	0.125541
3	10	Ahrfl/fl	0.0527523
3	11	Ahrfl/fl	0.020316
3	12	Ahrfl/fl	0.00445434
3	13	Ahrfl/fl	0.00230947
3	14	Ahrfl/fl	0
3	15	Ahrfl/fl	0
4	0	Ahrfl/fl	0
4	6	Ahrfl/fl	0.178645
4	7	Ahrfl/fl	0.331868
4	8	Ahrfl/fl	0.353222
4	9	Ahrfl/fl	0.241379
4	10	Ahrfl/fl	NA
4	11	Ahrfl/fl	NA
4	12	Ahrfl/fl	NA
4	13	Ahrfl/fl	NA
4	14	Ahrfl/fl	NA
4	15	Ahrfl/fl	NA
5	0	Ahrfl/fl	0
5	6	Ahrfl/fl	0.0372549
5	7	Ahrfl/fl	0.116331
5	8	Ahrfl/fl	0.117241
5	9	Ahrfl/fl	0.154018
5	10	Ahrfl/fl	0.078341
5	11	Ahrfl/fl	0.0493274
5	12	Ahrfl/fl	0.0448113
5	13	Ahrfl/fl	0.0356347
5	14	Ahrfl/fl	0.028169
5	15	Ahrfl/fl	0.00233645
6	0	Ahrfl/fl	0
6	6	Ahrfl/fl	0.0650224
6	7	Ahrfl/fl	0.174888
6	8	Ahrfl/fl	0.318807
6	9	Ahrfl/fl	0.197701
6	10	Ahrfl/fl	0.0858469
6	11	Ahrfl/fl	0.00907029
6	12	Ahrfl/fl	0
6	13	Ahrfl/fl	0
6	14	Ahrfl/fl	0.00456621
6	15	Ahrfl/fl	0.0100402
7	0	Ahrfl/fl	0
7	6	Ahrfl/fl	0.140351
7	7	Ahrfl/fl	0.290254
7	8	Ahrfl/fl	0.247191
7	9	Ahrfl/fl	0.102784
7	10	Ahrfl/fl	0.0108696
7	11	Ahrfl/fl	0.00460829
7	12	Ahrfl/fl	0.00217865
7	13	Ahrfl/fl	0
7	14	Ahrfl/fl	0.0021645
7	15	Ahrfl/fl	0.00678733
8	0	Ahrfl/fl	0
8	6	Ahrfl/fl	0.239278
8	7	Ahrfl/fl	0.35782
8	8	Ahrfl/fl	0.264916
8	9	Ahrfl/fl	0.211268
8	10	Ahrfl/fl	NA
8	11	Ahrfl/fl	NA
8	12	Ahrfl/fl	NA
8	13	Ahrfl/fl	NA
8	14	Ahrfl/fl	NA
8	15	Ahrfl/fl	NA
9	0	Ahrfl/fl	0
9	6	Ahrfl/fl	0.147903
9	7	Ahrfl/fl	0.219955
9	8	Ahrfl/fl	0.155606
9	9	Ahrfl/fl	0.0984683
9	10	Ahrfl/fl	0.0251572
9	11	Ahrfl/fl	0.00445434
9	12	Ahrfl/fl	0.00438596
9	13	Ahrfl/fl	0.00683371
9	14	Ahrfl/fl	0
9	15	Ahrfl/fl	0.0114155
10	0	Ahrfl/fl Tekcre/+	0
10	5	Ahrfl/fl Tekcre/+	0.0271967
10	6	Ahrfl/fl Tekcre/+	0.105033
10	7	Ahrfl/fl Tekcre/+	0.307018
10	8	Ahrfl/fl Tekcre/+	0.454945
10	9	Ahrfl/fl Tekcre/+	0.256351
10	10	Ahrfl/fl Tekcre/+	0.319635
10	11	Ahrfl/fl Tekcre/+	NA
10	12	Ahrfl/fl Tekcre/+	NA
10	13	Ahrfl/fl Tekcre/+	NA
10	14	Ahrfl/fl Tekcre/+	NA
10	15	Ahrfl/fl Tekcre/+	NA
11	0	Ahrfl/fl Tekcre/+	0
11	5	Ahrfl/fl Tekcre/+	0.0784314
11	6	Ahrfl/fl Tekcre/+	0.226293
11	7	Ahrfl/fl Tekcre/+	0.382353
11	8	Ahrfl/fl Tekcre/+	0.271264
11	9	Ahrfl/fl Tekcre/+	NA
11	10	Ahrfl/fl Tekcre/+	NA
11	11	Ahrfl/fl Tekcre/+	NA
11	12	Ahrfl/fl Tekcre/+	NA
11	13	Ahrfl/fl Tekcre/+	NA
11	14	Ahrfl/fl Tekcre/+	NA
11	15	Ahrfl/fl Tekcre/+	NA
12	0	Ahrfl/fl Tekcre/+	0
12	5	Ahrfl/fl Tekcre/+	0.14554
12	6	Ahrfl/fl Tekcre/+	0.332636
12	7	Ahrfl/fl Tekcre/+	0.445205
12	8	Ahrfl/fl Tekcre/+	NA
12	9	Ahrfl/fl Tekcre/+	NA
12	10	Ahrfl/fl Tekcre/+	NA
12	11	Ahrfl/fl Tekcre/+	NA
12	12	Ahrfl/fl Tekcre/+	NA
12	13	Ahrfl/fl Tekcre/+	NA
12	14	Ahrfl/fl Tekcre/+	NA
12	15	Ahrfl/fl Tekcre/+	NA
13	0	Ahrfl/fl Tekcre/+	0
13	5	Ahrfl/fl Tekcre/+	0.0714286
13	6	Ahrfl/fl Tekcre/+	0.214592
13	7	Ahrfl/fl Tekcre/+	0.426374
13	8	Ahrfl/fl Tekcre/+	0.278509
13	9	Ahrfl/fl Tekcre/+	NA
13	10	Ahrfl/fl Tekcre/+	NA
13	11	Ahrfl/fl Tekcre/+	NA
13	12	Ahrfl/fl Tekcre/+	NA
13	13	Ahrfl/fl Tekcre/+	NA
13	14	Ahrfl/fl Tekcre/+	NA
13	15	Ahrfl/fl Tekcre/+	NA
14	0	Ahrfl/fl Tekcre/+	0
14	5	Ahrfl/fl Tekcre/+	0.0415648
14	6	Ahrfl/fl Tekcre/+	0.179191
14	7	Ahrfl/fl Tekcre/+	0.358369
14	8	Ahrfl/fl Tekcre/+	0.303571
14	9	Ahrfl/fl Tekcre/+	0.334802
14	10	Ahrfl/fl Tekcre/+	0.171779
14	11	Ahrfl/fl Tekcre/+	NA
14	12	Ahrfl/fl Tekcre/+	NA
14	13	Ahrfl/fl Tekcre/+	NA
14	14	Ahrfl/fl Tekcre/+	NA
14	15	Ahrfl/fl Tekcre/+	NA
15	0	Ahrfl/fl Tekcre/+	0
15	6	Ahrfl/fl Tekcre/+	0.0938166
15	7	Ahrfl/fl Tekcre/+	0.271071
15	8	Ahrfl/fl Tekcre/+	0.2
15	9	Ahrfl/fl Tekcre/+	0.238636
15	10	Ahrfl/fl Tekcre/+	NA
15	11	Ahrfl/fl Tekcre/+	NA
15	12	Ahrfl/fl Tekcre/+	NA
15	13	Ahrfl/fl Tekcre/+	NA
15	14	Ahrfl/fl Tekcre/+	NA
15	15	Ahrfl/fl Tekcre/+	NA
16	0	Ahrfl/fl Tekcre/+	0
16	6	Ahrfl/fl Tekcre/+	0.239651
16	7	Ahrfl/fl Tekcre/+	0.518779
16	8	Ahrfl/fl Tekcre/+	0.381733
16	9	Ahrfl/fl Tekcre/+	NA
16	10	Ahrfl/fl Tekcre/+	NA
16	11	Ahrfl/fl Tekcre/+	NA
16	12	Ahrfl/fl Tekcre/+	NA
16	13	Ahrfl/fl Tekcre/+	NA
16	14	Ahrfl/fl Tekcre/+	NA
16	15	Ahrfl/fl Tekcre/+	NA
17	0	Ahrfl/fl Tekcre/+	0
17	6	Ahrfl/fl Tekcre/+	0.274892
17	7	Ahrfl/fl Tekcre/+	0.471655
17	8	Ahrfl/fl Tekcre/+	0.306413
17	9	Ahrfl/fl Tekcre/+	NA
17	10	Ahrfl/fl Tekcre/+	NA
17	11	Ahrfl/fl Tekcre/+	NA
17	12	Ahrfl/fl Tekcre/+	NA
17	13	Ahrfl/fl Tekcre/+	NA
17	14	Ahrfl/fl Tekcre/+	NA
17	15	Ahrfl/fl Tekcre/+	NA
18	0	Ahrfl/fl Tekcre/+	0
18	6	Ahrfl/fl Tekcre/+	0.232301
18	7	Ahrfl/fl Tekcre/+	0.43021
18	8	Ahrfl/fl Tekcre/+	0.261391
18	9	Ahrfl/fl Tekcre/+	NA
18	10	Ahrfl/fl Tekcre/+	NA
18	11	Ahrfl/fl Tekcre/+	NA
18	12	Ahrfl/fl Tekcre/+	NA
18	13	Ahrfl/fl Tekcre/+	NA
18	14	Ahrfl/fl Tekcre/+	NA
18	15	Ahrfl/fl Tekcre/+	NA

## Sheet: 6C
mouse	dpi	genotype	heme (uM)
1	0	Ahrfl/fl	455.463
1	7	Ahrfl/fl	1648.03
1	8	Ahrfl/fl	691.356
2	0	Ahrfl/fl	271.991
2	7	Ahrfl/fl	599.62
2	8	Ahrfl/fl	783.092
2	9	Ahrfl/fl	599.62
3	0	Ahrfl/fl	586.515
3	7	Ahrfl/fl	337.516
3	8	Ahrfl/fl	612.725
3	9	Ahrfl/fl	271.991
4	0	Ahrfl/fl	299.956
4	7	Ahrfl/fl	721.221
4	8	Ahrfl/fl	672.391
4	9	Ahrfl/fl	306.169
5	0	Ahrfl/fl	122.971
5	7	Ahrfl/fl	123.058
5	8	Ahrfl/fl	184.095
5	9	Ahrfl/fl	159.68
6	0	Ahrfl/fl	111.172
6	7	Ahrfl/fl	318.376
6	8	Ahrfl/fl	184.095
6	9	Ahrfl/fl	245.132
7	0	Ahrfl/fl	229.162
7	7	Ahrfl/fl	269.547
7	8	Ahrfl/fl	501.487
7	9	Ahrfl/fl	318.376
8	7	Ahrfl/fl	281.754
8	8	Ahrfl/fl	721.221
8	9	Ahrfl/fl	306.169
9	7	Ahrfl/fl	232.925
9	8	Ahrfl/fl	696.806
9	9	Ahrfl/fl	208.51
11	0	Ahrfl/fl Tekcre/+	324.411
11	7	Ahrfl/fl Tekcre/+	1831.5
11	8	Ahrfl/fl Tekcre/+	534.094
12	0	Ahrfl/fl Tekcre/+	429.253
12	7	Ahrfl/fl Tekcre/+	1805.29
13	0	Ahrfl/fl Tekcre/+	468.568
13	7	Ahrfl/fl Tekcre/+	2421.24
13	8	Ahrfl/fl Tekcre/+	730.671
14	0	Ahrfl/fl Tekcre/+	206.465
14	7	Ahrfl/fl Tekcre/+	874.828
14	8	Ahrfl/fl Tekcre/+	1700.45
14	9	Ahrfl/fl Tekcre/+	180.255
15	7	Ahrfl/fl Tekcre/+	306.169
15	8	Ahrfl/fl Tekcre/+	1087.44
15	9	Ahrfl/fl Tekcre/+	342.791
16	7	Ahrfl/fl Tekcre/+	1954.17
16	8	Ahrfl/fl Tekcre/+	794.465
17	0	Ahrfl/fl Tekcre/+	170.167
17	7	Ahrfl/fl Tekcre/+	1026.41
17	8	Ahrfl/fl Tekcre/+	550.317
18	0	Ahrfl/fl Tekcre/+	229.162
18	7	Ahrfl/fl Tekcre/+	1160.69
18	8	Ahrfl/fl Tekcre/+	647.976

## Sheet: 6D
mouse	dpi	genotype	BUN (mg/dL)
1	0	Ahrfl/fl	43.7209
1	7	Ahrfl/fl	156.279
1	8	Ahrfl/fl	165.116
2	0	Ahrfl/fl	42.7907
2	7	Ahrfl/fl	120.93
2	8	Ahrfl/fl	116.744
2	9	Ahrfl/fl	73.4884
3	0	Ahrfl/fl	48.6822
3	7	Ahrfl/fl	107.907
3	8	Ahrfl/fl	140.93
3	9	Ahrfl/fl	100.93
4	0	Ahrfl/fl	100
4	7	Ahrfl/fl	12.091
4	8	Ahrfl/fl	229.018
4	9	Ahrfl/fl	515.647
5	0	Ahrfl/fl	75
5	7	Ahrfl/fl	68.7055
5	8	Ahrfl/fl	88.7624
5	9	Ahrfl/fl	35.4196
6	0	Ahrfl/fl	120
6	7	Ahrfl/fl	52.0626
6	8	Ahrfl/fl	89.1892
6	9	Ahrfl/fl	88.7624
7	0	Ahrfl/fl	214.646
7	7	Ahrfl/fl	132.29
7	8	Ahrfl/fl	160.455
7	9	Ahrfl/fl	138.691
8	0	Ahrfl/fl	97.2222
8	7	Ahrfl/fl	130.156
8	8	Ahrfl/fl	183.499
8	9	Ahrfl/fl	390.469
9	0	Ahrfl/fl	93.8889
9	7	Ahrfl/fl	66.1451
9	8	Ahrfl/fl	90.4694
9	9	Ahrfl/fl	71.6927
11	0	Ahrfl/fl Tekcre/+	40
11	7	Ahrfl/fl Tekcre/+	314.419
11	8	Ahrfl/fl Tekcre/+	550.388
12	0	Ahrfl/fl Tekcre/+	34.7287
12	7	Ahrfl/fl Tekcre/+	259.07
13	0	Ahrfl/fl Tekcre/+	40.6202
13	7	Ahrfl/fl Tekcre/+	387.907
13	8	Ahrfl/fl Tekcre/+	761.24
14	0	Ahrfl/fl Tekcre/+	36.2791
14	7	Ahrfl/fl Tekcre/+	357.674
14	8	Ahrfl/fl Tekcre/+	312.403
14	9	Ahrfl/fl Tekcre/+	737.984
15	0	Ahrfl/fl Tekcre/+	75
15	7	Ahrfl/fl Tekcre/+	14.936
15	8	Ahrfl/fl Tekcre/+	335.704
15	9	Ahrfl/fl Tekcre/+	571.124
16	0	Ahrfl/fl Tekcre/+	68.3333
16	7	Ahrfl/fl Tekcre/+	11.3798
16	8	Ahrfl/fl Tekcre/+	788.051
17	0	Ahrfl/fl Tekcre/+	72.7778
17	7	Ahrfl/fl Tekcre/+	9.24609
17	8	Ahrfl/fl Tekcre/+	626.6
18	0	Ahrfl/fl Tekcre/+	60.5556
18	7	Ahrfl/fl Tekcre/+	10.6686
18	8	Ahrfl/fl Tekcre/+	836.415
