# Supplementary material for: Metabolic profiling during malaria reveals the role of the aryl hydrocarbon receptor in regulating kidney injury
Source: eLife. 2020 Oct 6;9:e60165. doi: 10.7554/eLife.60165 (PMC7538157; doi:10.7554/eLife.60165)
Supplement: Source data 1. [file elife-60165-data1.xlsx]

## Sheet: Explanation
	OrigScale		Values are normalized in terms of raw area counts.
			For a single day run, this is equivalent to the raw data.
	ScaledImpData		Each biochemical in OrigScale is rescaled to set the median equal to 1.
			Then, missing values are imputed with the minimum.
	DilutionNormImpData		Values for each sample are normalized by dilution.
			Each biochemical in OrigScale is then rescaled to set the median equal to 1.
			Lastly, missing values are imputed with the minimum.
	Pathway Heat Map		This is the heat map associated with the statistical analysis of the data.
			Indicates ratios, p- and q-values for each comparison.
			0.55	Green: indicates significant difference (p≤0.05) between the groups shown, metabolite ratio of < 1.00
			0.76	Light Green: narrowly missed statistical cutoff for significance 0.05<p<0.10, metabolite ratio of < 1.00
			1.71	Red: indicates significant difference (p≤0.05) between the groups shown; metabolite ratio of ≥ 1.00
			1.32	Light Red: narrowly missed statistical cutoff for significance 0.05<p<0.10, metabolite ratio of ≥ 1.00
			1.2	Non-colored text and cell: mean values are not significantly different for that comparison
				Blue: indicates significant (p≤0.05) ANOVA effect.
				Light Blue: indicates 0.05<p<0.10 ANOVA effect
		* indicates compounds that have not been officially confirmed based on a standard, but we are confident in its identity
	Box Plots - Alpha		Box plots are provided for each biochemical detected, sorted alphabetically by biochemical name.
	Box Plots - Pathway		Box plots are provided for each biochemical detected, sorted by biochemical pathway.
	Line Plots - Alpha		Line plots are provided for each biochemical detected, sorted alphabetically by biochemical name.
	Line Plots - Pathway		Line plots are provided for each biochemical detected, sorted by biochemical pathway.

## Sheet: OrigScale
												SAMPLE NAME	SFUN-00369	SFUN-00370	SFUN-00371	SFUN-00372	SFUN-00373	SFUN-00374	SFUN-00375	SFUN-00376	SFUN-00377	SFUN-00378	SFUN-00379	SFUN-00380	SFUN-00381	SFUN-00382	SFUN-00383	SFUN-00384	SFUN-00385	SFUN-00386	SFUN-00387	SFUN-00388	SFUN-00389	SFUN-00390	SFUN-00391	SFUN-00392	SFUN-00393	SFUN-00394	SFUN-00395	SFUN-00396	SFUN-00397	SFUN-00398	SFUN-00399	SFUN-00400	SFUN-00401	SFUN-00402	SFUN-00403	SFUN-00404	SFUN-00405
												PARENT SAMPLE ID	3462366	3462367	3462368	3462369	3462370	3462371	3462372	3462373	3462374	3462375	3462376	3462377	3462378	3462379	3462380	3462381	3462382	3462383	3462384	3462385	3462386	3462387	3462388	3462389	3462390	3462391	3462392	3462393	3462394	3462395	3462396	3462397	3462398	3462399	3462400	3462401	3462402
												CLIENT IDENTIFIER	1_1	2_2	3_3	4_4	5_5	6_1.1	7_2.1	8_3.1	9_4.1	10_5.1	11_1.2	12_2.2	13_3.2	14_4.2	15_5.2	16_1.3	17_2.3	18_3.3	19_4.3	20_5.3	21_1.4	22_2.4	23_3.4	24_4.4	25_5.4	26_1.5	27_2.5	28_3.5	29_4.5	30_5.5	31_6.5	32_7.5	33_1.6	34_2.6	35_3.6	36_4.6	37_5.6
												DAY POST INFECTION	0	0	0	0	0	1	1	1	1	1	2	2	2	2	2	3	3	3	3	3	4	4	4	4	4	5	5	5	5	5	5	5	6	6	6	6	6
												EDTA VOLUME	100	100	100	100	100	100	100	100	100	100	100	100	100	100	100	100	100	100	100	100	100	100	100	100	100	100	100	100	100	100	100	100	100	100	100	100	100
												GROSS BLOOD VOLUME	820	750	800	750	770	760	800	730	800	800	780	710	770	800	770	730	690	770	670	730	750	820	770	720	750	830	790	840	680	800	700	710	650	840	760	750	710
												INFECTED 1/0	0	0	0	0	0	1	1	1	1	1	1	1	1	1	1	1	1	1	1	1	1	1	1	1	1	1	1	1	1	1	0	0	1	1	1	1	1
												MOUSE	1	2	3	4	5	1.1	2.1	3.1	4.1	5.1	1.2	2.2	3.2	4.2	5.2	1.3	2.3	3.3	4.3	5.3	1.4	2.4	3.4	4.4	5.4	1.5	2.5	3.5	4.5	5.5	6.5	7.5	1.6	2.6	3.6	4.6	5.6
												NET BLOOD VOLUME	720	650	700	650	670	660	700	630	700	700	680	610	670	700	670	630	590	670	570	630	650	720	670	620	650	730	690	740	580	700	600	610	550	740	660	650	610
												NORMALIZATION	0.878	0.8667	0.875	0.8667	0.8701	0.8684	0.875	0.863	0.875	0.875	0.8718	0.8592	0.8701	0.875	0.8701	0.863	0.8551	0.8701	0.8507	0.863	0.8667	0.878	0.8701	0.8611	0.8667	0.8795	0.8734	0.881	0.8529	0.875	0.8571	0.8592	0.8462	0.881	0.8684	0.8667	0.8592
												REMAINING SERUM	210	175	200	175	185	180	200	165	200	200	190	155	185	200	185	165	145	185	135	165	175	210	185	160	175	215	195	220	140	200	150	155	125	220	180	175	155
												SAMPLE AMOUNT	approx 100 ul	approx 100 ul	approx 100 ul	approx 100 ul	approx 100 ul	approx 100 ul	approx 100 ul	approx 100 ul	approx 100 ul	approx 100 ul	approx 100 ul	approx 100 ul	approx 100 ul	approx 100 ul	approx 100 ul	approx 100 ul	approx 100 ul	approx 100 ul	approx 100 ul	approx 100 ul	approx 100 ul	approx 100 ul	approx 100 ul	approx 100 ul	approx 100 ul	approx 100 ul	approx 100 ul	approx 100 ul	approx 100 ul	approx 100 ul	approx 100 ul	approx 100 ul	approx 100 ul	approx 100 ul	approx 100 ul	approx 100 ul	approx 100 ul
												SAMPLE MATRIX	Plasma	Plasma	Plasma	Plasma	Plasma	Plasma	Plasma	Plasma	Plasma	Plasma	Plasma	Plasma	Plasma	Plasma	Plasma	Plasma	Plasma	Plasma	Plasma	Plasma	Plasma	Plasma	Plasma	Plasma	Plasma	Plasma	Plasma	Plasma	Plasma	Plasma	Plasma	Plasma	Plasma	Plasma	Plasma	Plasma	Plasma
												SAMPLE NUMBER	1	2	3	4	5	6	7	8	9	10	11	12	13	14	15	16	17	18	19	20	21	22	23	24	25	26	27	28	29	30	31	32	33	34	35	36	37
												SERUM REQUIREMENTS OTH 1	200	200	200	200	200	200	200	200	200	200	200	200	200	200	200	200	200	200	200	200	200	200	200	200	200	200	200	200	200	200	200	200	200	200	200	200	200
												SERUM VOLUME ESTIMATE 1	410	375	400	375	385	380	400	365	400	400	390	355	385	400	385	365	345	385	335	365	375	410	385	360	375	415	395	420	340	400	350	355	325	420	380	375	355
												TREATMENT	Uninfected	Uninfected	Uninfected	Uninfected	Uninfected	Infected	Infected	Infected	Infected	Infected	Infected	Infected	Infected	Infected	Infected	Infected	Infected	Infected	Infected	Infected	Infected	Infected	Infected	Infected	Infected	Infected	Infected	Infected	Infected	Infected	Uninfected	Uninfected	Infected	Infected	Infected	Infected	Infected
												VOLUME TO METABOLON	100	100	100	100	100	100	100	100	100	100	100	100	100	100	100	100	100	100	100	100	100	100	100	100	100	100	100	100	100	100	100	100	100	100	100	100	100
PATHWAY SORTORDER	BIOCHEMICAL	SUPER PATHWAY	SUB PATHWAY	COMP ID	PLATFORM	CHEMICAL ID	RI	MASS	CAS	PUBCHEM	KEGG	Group HMDB	D0	D0	D0	D0	D0	D1 Inf	D1 Inf	D1 Inf	D1 Inf	D1 Inf	D2 Inf	D2 Inf	D2 Inf	D2 Inf	D2 Inf	D3 Inf	D3 Inf	D3 Inf	D3 Inf	D3 Inf	D4 Inf	D4 Inf	D4 Inf	D4 Inf	D4 Inf	D5 Inf	D5 Inf	D5 Inf	D5 Inf	D5 Inf	D5 Non	D5 Non	D6 Inf	D6 Inf	D6 Inf	D6 Inf	D6 Inf
2098	1-(1-enyl-palmitoyl)-2-arachidonoyl-GPC (P-16:0/20:4)*	Lipid	Plasmalogen	52689	LC/MS Pos Late	100009014	2154	766.575				HMDB11220	4874047	3707904	3.14078e+06	7.58424e+06	3954780	2639279	4.15922e+06	3044322	3404766	2770832	3559755	3455690	3502818	2477425	4303420	2860195	3763300	3619416	3187621	3761194	3594823	3112129	3190074	2619119	4272148	3122708	2581932	3183503	2899866		4221620	3467155	2640489	3533532	2762016	2946318	2409463
2090	1-(1-enyl-palmitoyl)-2-arachidonoyl-GPE (P-16:0/20:4)*	Lipid	Plasmalogen	52673	LC/MS Pos Late	100009002	2270	724.528				HMDB11352	3.21739e+06	2812021	2603010	4698590	3385106	2703304	3.49913e+06	2538842	2978920	2.95159e+06	3052365	3390385	3591497	2418144	3317598	2767410	2562921	2284847	2793730	3615940	3240624	3270996	2489710	2709810	3461829	3.57635e+06	2860156	2826745	3183384	2743662	3971874	3.14089e+06	3831620	3.37708e+06	3419618	4042025	3.79943e+06
2099	1-(1-enyl-palmitoyl)-2-linoleoyl-GPC (P-16:0/18:2)*	Lipid	Plasmalogen	52682	LC/MS Pos Late	100009009	2226	742.575				HMDB11211	4112285	3913859	3.98005e+06	5922128	3693315	4303026	4320286	3.21789e+06	2991590	4924544	3996756	3.81725e+06	3.59547e+06	2411410	4874884	6312090	3441028	3944476	4070183	3550471	3.39983e+06	4531039	5127843	3647623	4790171	5939364	3415960	3778308	2715758	3.08715e+06	4080128	3762416	3.51952e+06	3755634	4233829	3831753	2574767
2087	1-(1-enyl-palmitoyl)-2-linoleoyl-GPE (P-16:0/18:2)*	Lipid	Plasmalogen	52677	LC/MS Pos Late	100009069	2351	700.528				HMDB11343	579899	402814	474208	1039298	534190	532236				547261	328324	554098	609528	310892	611853	564237	448950	308181	421692	607249	531819	699696	287344	424815	815430	635052	494487	316471	533188	415016	766108	557345	364139	768119	473327	482376	427052
2092	1-(1-enyl-palmitoyl)-2-oleoyl-GPC (P-16:0/18:1)*	Lipid	Plasmalogen	52478	LC/MS Pos Late	100009007	2443	744.59					698502	831023	845561	919230	820964	934571	948803	752696	740701	530033	867551	726069	1012764	564442	924018	785112	1056814	996274	727641	1306195	870721	780283	1061668	917432	893230	675301	685480	995805	866098	1001245	1159803	1225874	713614	892157	655889	1103961	1070515
2086	1-(1-enyl-palmitoyl)-2-oleoyl-GPE (P-16:0/18:1)*	Lipid	Plasmalogen	52477	LC/MS Pos Late	100009005	2600	702.543				HMDB11342	760444	706411	602420	988064	686599	603217	669250	690103	682487	863168	509337	839606	905574	644181	722117	750782	563743	409029	937180	1028767	869302	1222469	562632	604591	1050085	892521	696600	819392	861533	725505	1121006	1356339	691431	1221287	772068	670116	894221
2088	1-(1-enyl-palmitoyl)-2-palmitoyl-GPC (P-16:0/16:0)*	Lipid	Plasmalogen	52716	LC/MS Pos Late	100009162	2454	718.575		11146967		HMDB11206	1284994	1169318	1210840	1817127	1382181	1332454	1.25009e+06	1081732	1430219	1259132	1172734	1306472	1458205	1240998	1362443	1.35469e+06	1473004	1498521	1273377	1.25667e+06	1363157	1458545	1695445	1.2392e+06	1254766	1160113	1256055	1459210	1385112	1305715	1408148	1559940	1511938	1.38115e+06	1379697	1.75271e+06	1690982
2114	1-(1-enyl-palmitoyl)-GPC (P-16:0)*	Lipid	Lysoplasmalogen	52474	LC/MS Pos Late	100002875	1547	480.345		10917802		HMDB10407	2036489	1.03433e+06	1419033	1890246	1605237	1513364	1613084	1245725	1538596	1679757	1494967	1718718	1563563	1436364	1335938	1582450	1.77884e+06	1012036	1212895	1487116	1140020	1393357	1108419	948580	1396338	1233100	1204197	1337398	1318110	985340	1258825	1.3405e+06	1149751	1495897	1178951	1302168	1484946
2115	1-(1-enyl-palmitoyl)-GPE (P-16:0)*	Lipid	Lysoplasmalogen	39270	LC/MS Pos Late	100003000	1558	438.298					269656	221372	400923	342031	245648	220535	301808	216293	222535	257811	227060	256710	339068	200845	221878	257686	198931	175809	215124	258201	232777	279570	169436	164551	311740	453313	222911	265803	329640	279064	243686	265958	352529	402296	335862	451547	290330
2102	1-(1-enyl-stearoyl)-2-arachidonoyl-GPE (P-18:0/20:4)*	Lipid	Plasmalogen	52475	LC/MS Pos Late	100008999	2511	752.559		9547058		HMDB05779	7131800	6289520	4769969	10763717	7739918	6.9518e+06	7.57115e+06	4980088	7021114	5217531	6785838	6221522	7856941	5594480	6683918	4683311	5182674	5360298	5314091	5797140	6502770	7.3909e+06	4476851	5009259	6314240	6870923	6.09888e+06	5716619	7095227	6546538	7653147	6.20812e+06	6953073	8701733	5760384	9334078	7758934
2095	1-(1-enyl-stearoyl)-2-linoleoyl-GPE (P-18:0/18:2)*	Lipid	Plasmalogen	52748	LC/MS Pos Late	100009225	2633	728.559				HMDB11376	3395907	2241885	2231235	4488025	2715655	3323434	3133294	2151077	2202581	2972918	2857612	2556218	3724438	1879678	2540899	2863260	2250110	1984285	2348334	2745773	2658519	3851039	1965867	2032824	2942500	3188073	2139169	2630916	2148913	2324185	2972406	3145665	2313013	3851968	2522621	3157098	2766846
2119	1-(1-enyl-stearoyl)-GPE (P-18:0)*	Lipid	Lysoplasmalogen	39271	LC/MS Neg	100003001	6500	464.315					379977	147508	244338	355657	297971	198381	309707	318316	297452	392992	261783	252854	263200	328465	219329	100666	165939	183769	189064	156339	248487	163923	137303	103623	255532	203809	251764	252459	361679	198060	235066	151344	283678	459611	429678	307247	256296
4495	1,2,3-benzenetriol sulfate (2)	Xenobiotics	Chemical	48762	LC/MS Neg	100006374	1709	204.981					90286	1108076	47290	43816	105518	48983	74240	162531	376188	253289	196644	96085	601022	139258	203125	119910	60600	87984	88077	213663	233930	110058	117375		207224	105007	371718	173439	62876	70899	212351	78560	143225	664592	345968	141748	178751
1717	1,2-dilinoleoyl-GPC (18:2/18:2)	Lipid	Phosphatidylcholine (PC)	52603	LC/MS Pos Late	100008903	2006	782.569	998-06-1	5288075		HMDB08138	156409360	136589200	110319376	146319696	133190784	173575776	186121120	134937248	165730768	219549872	155787376	140523504	140889200	117538592	143630896	184488016	108231392	106370480	131730056	121670592	102027256	139665312	143016448	110931040	137952432	133958800	146718240	141775392	95281104	91089208	122455408	127374896	147804768	129804776	138152560	151779536	77805016
1630	1,2-dipalmitoyl-GPC (16:0/16:0)	Lipid	Phosphatidylcholine (PC)	19130	LC/MS Pos Late	100000657	2365	734.569	63-89-8	452110	D03585	HMDB00564	39588152	40104344	41334300	59916392	50028164	52573128	48702232	43557376	52571784	51452492	48189688	41919816	51856984	47477328	46449904	51765980	49966464	41268896	45330652	48647168	53297376	52039164	46224612	45368824	46461392	58959160	46568268	46719956	67795912	55015632	53153764	57213832	61639484	62338732	57063872	68048288	71756496
1749	1,2-dipalmitoyl-GPE (16:0/16:0)*	Lipid	Phosphatidylethanolamine (PE)	57341	LC/MS Pos Late	100009204	2498	692.522		445468		HMDB08923					73491		130088	85402	136828	112057	168066	155153	253210	169903	128196	168262	57092		267643	197194	111550	214270	161258	154168	136838	253265	116759	78186	223456	205334	297303	231955	258321	234141	211853	227774	342809
862	1,5-anhydroglucitol (1,5-AG)	Carbohydrate	Glycolysis, Gluconeogenesis, and Pyruvate Metabolism	20675	LC/MS Neg	100000580	802	163.061	154-58-5	64960	C07326	HMDB02712	11407859	15381163	10185657	13799174	14117151	8.22389e+06	10872606	13649856	11105405	8985470	15647901	14193667	16471178	15014254	15579138	11215716	12673173	14757309	14400571	14173737	14997294	17424668	17646376	12361384	16312342	6814377	13507080	15216903	14500728	13296033	14265912	15442307	14293696	14170008	12091280	14102866	11915184
1112	10-heptadecenoate (17:1n7)	Lipid	Long Chain Fatty Acid	33971	LC/MS Neg	100001278	5555	267.233	29743-97-3	5312435		HMDB60038	6.48135e+06	6818764	3698236	8540473	6007537	6302520	4398810	3992580	5193432	3495142	5.44685e+06	5376165	7711244	5.21392e+06	3734596	7211132	6449693	5680745	4047536	5198229	5622732	4319138	7846248	5584026	8555138	4495052	5177475	4293516	5534630	6487868	4931403	4304544	6518953	11028460	7552696	9141449	12901504
1123	10-nonadecenoate (19:1n9)	Lipid	Long Chain Fatty Acid	33972	LC/MS Neg	100001277	5780	295.264	73033-09-7	5312513		HMDB13622	1611370	2356426	1735370	3403903	2451521	2592439	2193526	1.88961e+06	1738546	1886285	1981541	1.97466e+06	2895081	1830074	1850257	2564580	2092368	1.91664e+06	1585343	2400152	1736785	1297039	2673882	1608182	3.63471e+06	1729045	1703624	1665441	1827622	2111772	1683165	1321120	2186706	4574333	2302073	3140272	4.16413e+06
1099	10-undecenoate (11:1n1)	Lipid	Medium Chain Fatty Acid	32497	LC/MS Neg	100001197	5085.8	183.139	1333-28-4	14891	C13910	HMDB33724	704211	832124	1689383	914076	828731	993886	437113	675035	1542095	589532	548224	868239	568737	712685	838739	743414	1083493	841405	353034	585538	832257	691426	765170	575409	571419	1.02401e+06	1115876	1182093	848292	1096330	672872	872833	1.01733e+06	1552244	757195	1045922	1121550
1443	12,13-DiHOME	Lipid	Fatty Acid, Dihydroxy	38395	LC/MS Neg	62	5137	313.238	263399-35-5	10236635	C14829	HMDB04705	558341	525857	1219162	879763	698409	1.03027e+06	429139	549600	710530	852569	607161	552263	709163	804735	581284	1.73544e+06	569755	773550	574444	631651	842532	561762	1588860	859537	825073	1096714	946590	669905	609924	618410	862373	553098	858405	1099883	664888	1260970	1312258
1519	12-HETE	Lipid	Eicosanoid	37536	LC/MS Neg	100002167	5326	319.228	71030-37-0;73837-14-6	5312983		HMDB06111	517201	499525	206858	848610	481568	400799	340928	252496	486469	131587	229879	570503	1142968	527545	187064	352132	403550	441104	369864	225574	320047	153706	428506	312876	515038	969456	389440		494445	497747	672999	259653	297652	704906	141161	360726	2439670
1423	13-HODE + 9-HODE	Lipid	Fatty Acid, Monohydroxy	37752	LC/MS Neg	100002196	5275	295.228		43013			471677	1000004	765398	748492	808887	1.20112e+06	773343	1058040	618682	683105	891405	603722	1654131	638017	461660	1.55388e+06	624459	734707	1.09099e+06	1542347	774673	924026	2.03219e+06	731744	1015851	522335	580514	378315	722314	579169	613377	454373	1367918	757267	1211549	1405962	1.59054e+06
1419	16-hydroxypalmitate	Lipid	Fatty Acid, Monohydroxy	39609	LC/MS Neg	100002953	5236.2	271.228	506-13-8	10466	C18218	HMDB06294	2548079	2550548	3348009	3108014	2539079	4109220	3495129	2562073	2722673	2871353	4396628	2722897	4106875	2670290	2122797	4733420	3112819	3521732	2773506	2833008	3182132	2935080	5.59763e+06	2.83791e+06	2.7332e+06	2668571	2.65457e+06	2137289	2537482	2.77255e+06	3.17245e+06	2017992	1798774	3513395	2039736	3351596	5057168
1221	17-methylstearate	Lipid	Fatty Acid, Branched	38296	LC/MS Neg	100002356	5993	297.28	2724-59-6	3083779		HMDB37397	564382	683696	546781	930539	726244	545032	531382	730249	440376	679983	601656	697922	719022	513047	680575	631660	603141	447387	585369	781401	737296	411217	692829	539555	858378	491128	588517	655076	598639	620204	666569	535525	818731	1061830	607080	800403	1054578
1935	1-arachidonoyl-GPC (20:4n6)*	Lipid	Lysophospholipid	33228	LC/MS Pos Late	100001551	1460	544.34			C05208	HMDB10395	241670848	182692128	254874704	260684832	244947392	169895552	212915504	185143008	236617936	165498352	170058016	253710976	216738752	212203712	196174192	161772336	241519136	178092080	190588912	205850224	209520928	213196464	136987344	139343920	209340384	202831264	209889744	187964880	259222944	208889904	194254912	222842720	198653120	226597808	201785536	184606528	162244960
1967	1-arachidonoyl-GPE (20:4n6)*	Lipid	Lysophospholipid	35186	LC/MS Pos Late	100001571	1470	502.293		42607465		HMDB11517	11164079	9467520	6066917	6842349	11035494	7616875	8762772	8.38771e+06	9925600	5479074	7644033	9164438	13782575	7912821	6806598	6204899	8979396	7990014	8157052	11896089	9011685	9762430	5185263	8.09289e+06	14598656	5760138	6630389	6603597	11144950	8848576	7134170	8416488	13508854	10800485	9863220	10637481	10573410
1998	1-arachidonoyl-GPI (20:4)*	Lipid	Lysophospholipid	34214	LC/MS Neg	100001654	5482	619.289				HMDB61690	2690285	2511000	871682	2611420	2275141	1674657	1727032	1959824	3433046	1129308	2088192	2143800	3631959	1661259	1547130	1638062	2402617	2166995	1593315	2102536	2205468	2225973	1569332	1775270	2916641	1344541	1877261	1669592	2541707	2182981	1307391	1949687	2479484	3074810	2310022	2538527	2071959
2146	1-arachidonylglycerol (20:4)	Lipid	Monoacylglycerol	34397	LC/MS Neg	100001433	6250	303.233	35474-99-8	5282281	C13857	HMDB11549	481986	440183	1142792	710464	552741	440467	519141	868654	201460	1338633	336339	737442	286379	379871	476842	1063700	260997	525937	634331	667839	205005	396073	575234	716621	391459	1148480	716416	693903	287856	866245	588770	355746	807768	936795	844672	672098	579335
2145	1-dihomo-linolenylglycerol (20:3)	Lipid	Monoacylglycerol	48341	LC/MS Neg	100006121	6400	305.249					201302	251578	416711	291324	252826	155601	255351	443282		399322	210451	416988	255807	303570	192775	467129	107248	286701	329853	421281		226599	252474	322727	266546	328143	299446	390863	278894	415839	235224	163462	525279	580869	627649	347518	177207
2149	1-docosahexaenoylglycerol (22:6)	Lipid	Monoacylglycerol	35153	LC/MS Neg	100001481	6150	309.222				HMDB11587		214663	391025	246525	138964	189902	92122	326559		270266	110516	315881	61705	209728		348115		256740	212263	284639		163108	257919	273393	171951	348194	208821	346314	266554	456980	221391	139829	369520	579959	329169	309468	232649
1946	1-lignoceroyl-GPC (24:0)	Lipid	Lysophospholipid	49617	LC/MS Pos Late	100002873	1907	608.465	325171-59-3			HMDB10405	2859827	1820001	1966861	2551156	2402389	2290282	2812984	2129195	2.09214e+06	1899791	2672935	2630150	2748896	2111018	2171958	2160435	2495227	2112379	2008525	2055099	1921132	2639632	2286502	1693880	1956223	1835912	1920289	2174987	2656651	1931017	1997855	2330145	2091795	2825928	1781748	2790451	1926961
2142	1-linolenoylglycerol (18:3)	Lipid	Monoacylglycerol	34393	LC/MS Neg	100001435	6214	277.217	124151-74-2	53480978		HMDB11569	1684546	1387163	806361	1170685	1740984	1109505	1648344	2472248	1152310	1754352	1118496	1760321	1583218	1960455	1115510	1078458	839163	949787	953506	1532011	840559	710607	903406	1152905	1641165	711822	993307	874863	1498387	1771185	975455	801465	3454129	3109714	2810490	2859778	1540297
1921	1-linolenoyl-GPC (18:3)*	Lipid	Lysophospholipid	45951	LC/MS Pos Late	100005350	1422	518.324				HMDB10388	15597719	10406778	15942178	7642224	12465707	16345465	11757591	10676500	14122912	22724952	13455903	10915591	10755464	13506986	9798108	17097932	14036375	8509429	8718326	11475102	9238128	11995284	7632106	6979534	9912733	11042015	10710666	11783571	11007556	13206916	7336688	8443641	10846145	12586602	12541430	12216891	12968823
1733	1-linoleoyl-2-arachidonoyl-GPC (18:2/20:4n6)*	Lipid	Phosphatidylcholine (PC)	52710	LC/MS Pos Late	100009131	1969	806.569				HMDB08147	68593872	62883520	49748356	66548980	63054504	51674568	69876160	53051604	56577084	37863984	54507664	73898576	64102316	57329356	52357412	50050104	54412884	55997272	48615196	58569872	40432572	65706424	43103400	45503312	56649676	29278220	55608056	49520992	37200900	49718152	50238764	58542504	41796840	59495856	38885264	49831976	33218402
1799	1-linoleoyl-2-arachidonoyl-GPE (18:2/20:4)*	Lipid	Phosphatidylethanolamine (PE)	53189	LC/MS Pos Late	100009222	2030	764.522				HMDB09102	534562	516799	367590	814567	560163	863085	842528	761160	900175	971982	995885	711974	1219595	840930	903148	1179024	753478	570382	1355270	930340	960166	1312159	1044661	1004455	989048	1.65513e+06	831858	632294	812335	987023	1210532	1246970	1118705	1.00431e+06	897813	1161139	1136694
1718	1-linoleoyl-2-linolenoyl-GPC (18:2/18:3)*	Lipid	Phosphatidylcholine (PC)	53176	LC/MS Pos Late	100009343	1939	780.554				HMDB08141	10625999	7158398	4655458	7.54849e+06	7994799	8482043	10248448	6158974	8583765	9872391	7642192	8.04654e+06	8079625	7683243	7.57415e+06	7.93784e+06	5913152	4684404	4966839	5254446	6146251	7343739	6361437	5562001	7632005	5858148	7.68627e+06	7306354	4517682	4011581	6868938	8003432	7.9157e+06	7.86806e+06	7179983	9723667	4258899
2141	1-linoleoylglycerol (18:2)	Lipid	Monoacylglycerol	27447	LC/MS Neg	100001040	6477	279.233	2277-28-3	5283469			24681240	30409046	24448540	32825114	36132120	20954190	20284788	39696628	26385556	38031344	20208360	39061256	41520324	40066248	22905392	31069450	17223020	25184604	23524328	40226192	20649838	15730735	23023648	27027604	36632696	24108820	30660962	33601768	38904392	43155412	27980048	25747454	95067704	62831532	81787224	52653744	31144780
1919	1-linoleoyl-GPC (18:2)	Lipid	Lysophospholipid	34419	LC/MS Pos Late	100001395	1465	520.34		11988421	C04100	HMDB10386	716597952	621670784	608777600	553930880	521572512	800050432	801684800	654324608	628246592	740605184	542610368	690743616	588670656	615843328	617887808	556195520	563608192	400865344	530882528	653191552	483874752	521112224	429051520	502104992	567025088	633118912	462487424	634593152	517645152	603294464	451044864	521365920	584404224	692969664	465906496	508643456	554726848
1960	1-linoleoyl-GPE (18:2)*	Lipid	Lysophospholipid	36600	LC/MS Pos Late	100001570	1482	478.293		52925130		HMDB11507	11295072	11425924	9550712	8092416	13342594	12862012	9372475	10314506	9777663	17268088	10436167	7210060	16979936	7760026	9977452	13801238	9203858	5031650	9989196	12615117	11564860	8172456	6421918	7189190	12253674	9434378	9992664	8057134	9272844	7936380	5590748	7897838	14502480	13648766	14560145	9805956	9676650
1986	1-linoleoyl-GPG (18:2)*	Lipid	Lysophospholipid	54885	LC/MS Neg	100009227	5516	507.273					319511	295054	182655	265726	328616	282388	357098	265982	448736	504695	288398	244230	358163	323440	194660	377773	234935	171845	169196	225328	290214	210388	250722	232541	389875	273070	228825	199167	253156	212394	171984	213988	365414	411148	429328	352028	256117
1994	1-linoleoyl-GPI (18:2)*	Lipid	Lysophospholipid	36594	LC/MS Neg	100001778	5494	595.289					651562	575119	267566	585290	668694	712496	700915	587462	1207766	664772	667091	532210	1011904	410223	491026	927395	639690	410006	441062	418461	525956	554688	641596	396373	894962	424673	519978	498041	458343	405130	279756	524087	701937	723566	755519	727830	377135
3221	N1-methyladenosine	Nucleotide	Purine Metabolism, Adenine containing	15650	LC/MS Pos Early	1242	2120	282.12	15763-06-1	27476	C02494	HMDB03331	2634906	1929189	2480159	3.18952e+06	3.02629e+06	2431389	2201605	2523190	2133907	1714918	2554070	3167633	2575771	3128536	2617104	2732902	3.13411e+06	3292854	2941217	2381292	3863364	3019551	2786988	2178760	2567168	2758939	2682970	2695174	2596345	3077647	2928402	3374840	2623452	2875041	2238877	2279320	3091582
75	1-methylhistamine	Amino Acid	Histidine Metabolism	43831	LC/MS Pos Early	100001204	3040	126.103	501-75-7	3614	C05127	HMDB00898	4566678	3516707	5189480	5401885	4901716	3758352	4858269	4236028	3369960	2945442	4.70903e+06	5344136	5999246	7.29767e+06	6532768	3757267	3682730	4296345	8744032	4895584	5.66302e+06	5920117	7686634	5154355	4172128	6061249	5783032	4792360	5639120	4773486	5456000	4427618	4503567	4080165	5698360	5288254	9430886
62	1-methylhistidine	Amino Acid	Histidine Metabolism	30460	LC/MS Neg	100001051	1227	168.078	332-80-9	92105	C01152	HMDB00001	37748	60757	34839	96424	92941	28890		48724	27362		49138	72308	58262	54608	46328	44833	73100	67651	40028	63537	38142	49085	50498	49230	49594	35297	51124	73198	110503	82569	54094	56687	93258	72830	90177	78870	140320
76	1-methylimidazoleacetate	Amino Acid	Histidine Metabolism	32350	LC/MS Pos Early	100001208	2064	141.066	2625-49-2	75810	C05828	HMDB02820	2166868	2260877	2242084	2.89041e+06	3087262	2234578	3140810	1.9268e+06	3111986	1883893	2422212	2382560	3100781	2787914	2750320	2522703	2172082	1796314	2.99258e+06	1812467	2.94727e+06	1598277	2523395	1648924	1980804	2940890	1880075	2388912	2660757	2919534	1669436	2863075	2607779	3036274	1.72683e+06	2757467	5858008
3352	1-methylnicotinamide	Cofactors and Vitamins	Nicotinate and Nicotinamide Metabolism	27665	LC/MS Pos Early	55	1940	137.071	1005-24-9	10129985	C02918	HMDB00699	14512202	8533186	8886174	7226739	6.80975e+06	11238779	8143598	6.38117e+06	16368021	5259557	18464800	12098407	13479008	10432888	11317970	6305683	5854867	8916078	11101653	8.26005e+06	10554847	12928023	4139692	19884630	20786612	8946036	12246855	11735250	8254453	12193287	16439011	7972076	6.85007e+06	9256968	8458019	9165031	10831818
1792	1-oleoyl-2-arachidonoyl-GPE (18:1/20:4)*	Lipid	Phosphatidylethanolamine (PE)	55041	LC/MS Pos Late	100009219	2200	766.538				HMDB09069	5215536	4204999	4108382	5220999	3.77677e+06	5297473	6536813	5127878	4369416	4343623	6233418	5.6176e+06	7001461	5863994	5127362	5308508	3.77127e+06	4949571	6577977	5915864	5.36484e+06	7667426	4899007	6.09487e+06	7.09002e+06	6273006	5481839	4762922	4748640	6027100	6178057	5897532	5762356	6274022	5440530	5636769	5.60863e+06
1889	1-oleoyl-2-arachidonoyl-GPI (18:1/20:4) *	Lipid	Phosphatidylinositol (PI)	54994	LC/MS Pos Late	100010951	2568	902.575				HMDB09844	1213329	1779277	2345457	1.6231e+06	1241503	1700260	1473530	1325662	1065363	1350974	1891695	1968663	1682665	982632	1169459	1722112	1761874	1424897	1.39178e+06	2470041	1087338	1.8134e+06	1053681	1550468	1350575	1753198	1229217	1084601	848533	1367617	952500	1631161	855644	1252556	1142788	947102	875331
1715	1-oleoyl-2-linoleoyl-GPC (18:1/18:2)*	Lipid	Phosphatidylcholine (PC)	52453	LC/MS Pos Late	100008981	2165	784.585					149399232	162517344	140460768	150802928	136581120	141349696	121181712	119410392	116495664	132101704	110915768	144913248	160210752	102520144	126640056	142145552	126861344	117196280	134592528	156391744	124342872	138033088	96951264	104267896	139515184	126509144	113046688	123355440	111937992	113765448	140833984	152777856	124867528	108798584	139739264	87221432	86213672
1782	1-oleoyl-2-linoleoyl-GPE (18:1/18:2)*	Lipid	Phosphatidylethanolamine (PE)	52687	LC/MS Pos Late	100009078	2270	742.538		9546753		HMDB05349	3659336	2651780	3188993	2886691	2588552	4.09202e+06	4772019	2766283	2962517	5294539	3909088	2697583	3970654	2632092	2739222	4903210	1965836	1894375	3204586	3246012	2928766	3106710	3.18487e+06	2710957	3465630	3792523	3.10226e+06	2754649	2047049	2493853	3180640	2809751	3620481	3405832	3.6996e+06	2758745	2691334
2140	1-oleoylglycerol (18:1)	Lipid	Monoacylglycerol	21184	LC/MS Neg	100000924	6650	281.249	111-03-5	5283468		HMDB11567	11853626	13384174	6266105	11094160	12401341	6881768	13049694	16542105	7707607	10799986	9214974	15435729	21318048	12431077		8860118	5731875	9600238	12231376	19617988	4840053	8475731	6759209	10362117	19820892	8347244	9631013	10182230	14388093	15356760	8471878	7476857	31526280	19537482	35359340	16662279	10776293
1916	1-oleoyl-GPC (18:1)	Lipid	Lysophospholipid	48258	LC/MS Pos Late	100001272	1540	522.355	19420-56-5	16081932		HMDB02815	202487680	223528768	220624368	184032368	213113552	229106752	243285584	214582976	182378160	206135728	249648320	228143728	268256544	179343056	190216320	187616064	239358320	223698432	230129264	245288304	202800432	299432832	150002112	210936288	232261056	193087232	197034448	181134000	196308224	227385984	141150368	207109056	190744000	217496160	220497744	167036832	173841024
1958	1-oleoyl-GPE (18:1)	Lipid	Lysophospholipid	35628	LC/MS Pos Late	100001569	1554	480.308	89576-29-4	9547071		HMDB11506	3746267	3550078	3309063	3383110	3.25514e+06	3108950	3844142	2771857	2823639	3.77538e+06	3.31915e+06	3409520	4547820	2101047	2708995	4010166	2827091	2439117	2992698	3.5876e+06	2999123	3550511	1940955	2414574	4416426	3486145	2816609	2623732	2752933	2529139	2550272	3289487	3.8137e+06	3.66439e+06	4043544	3091569	2762391
1660	1-palmitoleoyl-2-linolenoyl-GPC (16:1/18:3)*	Lipid	Phosphatidylcholine (PC)	53180	LC/MS Pos Late	100009345	1850	754.538				HMDB08008	618809	965553	417195	358703	690742	742283	760857	638818	386004	523041	801420	871949	916593	648244	584108	866200	692645	668834	434339	712338	691952	852272	508554	786569	672155	366487	617837	702591	581420	956759	515078	707975	478285	847048	560096	854068	825278
2137	1-palmitoleoylglycerol (16:1)*	Lipid	Monoacylglycerol	52431	LC/MS Neg	100008952	6094	253.217				HMDB11565	1458370	2.9553e+06	1066140	1121287	1922779	1689865	2.54945e+06	3445131		1962333	2113515	1566257	3951856	1731832	1370909	2497739	1.5787e+06	2527619	1767554	3.93943e+06	789408	2009078	1.80654e+06	2596804	2890629	1576448	1633601	936835	1990575	3562503	1.79452e+06	1174282	4977061	2.58743e+06	4602374	2462413	2808697
1909	1-palmitoleoyl-GPC (16:1)*	Lipid	Lysophospholipid	33230	LC/MS Pos Late	100001511	1450	494.324		24779461		HMDB10383	21927188	27507320	28181498	20859124	26246184	28834846	26664840	27145734	17585480	26518236	30686958	26265308	34875168	20701272	21879470	33235106	33888300	30557888	24379028	36937264	25551024	36055836	16191140	27151162	28650554	21839664	20038386	17565794	29835584	29048102	17562404	22900852	21107284	22634676	26220264	20443208	27198936
1673	1-palmitoyl-2-arachidonoyl-GPC (16:0/20:4n6)	Lipid	Phosphatidylcholine (PC)	52462	LC/MS Pos Late	100008914	2091	782.569	35418-58-7	10747814		HMDB07982	465795712	409214400	459012480	509755840	433333536	351226048	486441152	405325440	422549472	286636480	426013888	469576384	443034720	422339904	431428384	311245920	414373792	384246944	348251072	403856832	432160512	424311456	325371520	335985216	433492672	328488320	387073408	430667040	496584960	419304192	424975360	372570400	448322240	518890848	396900288	479520832	384427872
1767	1-palmitoyl-2-arachidonoyl-GPE (16:0/20:4)*	Lipid	Phosphatidylethanolamine (PE)	52464	LC/MS Pos Late	100008990	2198	740.522		9546800		HMDB05323	5.91437e+06	4334582	4267975	4759589	4334188	5296337	8281278	5.0117e+06	4856416	4314761	7720263	5084175	6383961	5136428	5463114	4213958	3275188	4817504	5109101	5386581	4495018	7312693	4461387	4513160	6642582	5281783	4858341	4716025	4131123	5.39093e+06	5172357	3942712	5667172	6738249	5805934	6568944	5.96886e+06
1861	1-palmitoyl-2-arachidonoyl-GPI (16:0/20:4)*	Lipid	Phosphatidylinositol (PI)	52467	LC/MS Pos Late	100008993	2567	876.56				HMDB09789	3148088	3079706	3840590	3502162	3925849	3383573	5297394	3865426	3854918	2923123	6747108	3.8141e+06	4771520	3109482	2899637	2685860	2632570	3607276	2705690	4124206	3222543	4978477	2145236	3630896	3720363	2905808	2783041	3019272	3133432	3418208	2753774	2458400	3044712	4102553	3362930	3472133	2660168
1650	1-palmitoyl-2-gamma-linolenoyl-GPC (16:0/18:3n6)*	Lipid	Phosphatidylcholine (PC)	54812	LC/MS Pos Late	100009154	2034	756.554				HMDB07974	20208424	14559613	23403232	16544171	19808056	19334740	28443406	19299368	22174262	15387972	31149200	18734250	20859136	20431756	20957548	18375968	16994240	18042508	15795406	21205248	15066336	20995720	18734592	16642510	19311352	16836008	17183772	19032322	18313428	22339012	14559055	14351064	20753732	25708852	21432380	31196542	21923132
1646	1-palmitoyl-2-linoleoyl-GPC (16:0/18:2)	Lipid	Phosphatidylcholine (PC)	42446	LC/MS Pos Late	1537	2160	758.569	40811-94-7	5287971		HMDB07973	1202923136	1026356928	926270656	1200549120	1116725248	1152146560	1268728704	1025669888	1163881600	1066435200	1255798912	1028445888	1258675328	1008176768	1060282112	985105856	924997184	899930368	883565568	1080502272	1024210816	1136519040	951821184	888681216	1139026688	863104896	1020610368	1046824064	1104369408	891233728	999843584	979814144	1123485824	1262140032	1073514304	1177129984	983741312
1758	1-palmitoyl-2-linoleoyl-GPE (16:0/18:2)	Lipid	Phosphatidylethanolamine (PE)	42449	LC/MS Pos Late	100001870	2275	716.522		9546747		HMDB05322	5404026	3087720	3732114	3546135	3740631	5580376	7590740	3948273	4412908	7902905	6986268	3398165	5815402	3410877	4492026	5938497	2395924	2760513	3378469	3986495	3704507	4342877	4319273	2970970	4721660	4140964	4046029	3827649	2423612	3182337	3575112	2697733	5580755	4727657	5560367	5238443	4159701
1856	1-palmitoyl-2-linoleoyl-GPI (16:0/18:2)	Lipid	Phosphatidylinositol (PI)	52450	LC/MS Pos Late	1528	2730	852.56				HMDB09784	1576837	1058636	1394886	1.76197e+06	1699783	2170173	2422737	1561731	1496135	2127072	2475283	1.78383e+06	1858424	1296187	1644109	2109042	1102116	952956	1231754	1518911	1140336	1675500	1591904	1425067	1265421	1367596	1370549	1187408	1368628	1029193	1088429	1191138	1665174	1871678	1532289	2104164	974013
1639	1-palmitoyl-2-oleoyl-GPC (16:0/18:1)	Lipid	Phosphatidylcholine (PC)	52461	LC/MS Pos Late	1539	2358	760.585	26853-31-6;26853-31-6	6436017		HMDB07972	296126048	331206816	274395424	263692576	338211168	339476352	391203296	339301408	276003488	265221296	460576480	303953088	410059968	265633408	282106912	257297040	316489792	350536928	308378720	386971520	288357728	478615552	250222208	356263264	378074976	267488448	291139232	273829120	343772288	357366912	250106576	253461568	309226336	302181536	374379744	342747488	350188672
1757	1-palmitoyl-2-oleoyl-GPE (16:0/18:1)	Lipid	Phosphatidylethanolamine (PE)	19263	LC/MS Pos Late	1526	2509	718.538	26662-94-2	5283496		HMDB05320	1181558	1320144	1178561	1383961	1331249	1950067	2538751	1724625	1679992	2220350	2402866	1654056	2342458	1512904	1476338	2368224	1022518	1350156	2158212	2135716	1645866	2349600	1863393	1.82202e+06	2175194	2588161	1.63023e+06	1119107	1800191	1986008	1922059	1729227	2191373	2054947	2078980	1952995	2422373
1631	1-palmitoyl-2-palmitoleoyl-GPC (16:0/16:1)*	Lipid	Phosphatidylcholine (PC)	52470	LC/MS Pos Late	100008984	2160	732.554				HMDB07969	10360822	16610729	16910152	11871351	12919600	16286009	19191668	16926092	7971681	13850563	26419728	13730449	20361944	11392002	14468289	18603806	13899424	17524188	13313765	23225208	12847538	24651344	11642740	18030896	17194340	14246150	12169223	11167414	15107193	18360196	9714563	10216702	14332794	12601566	18500348	14271882	18567104
1635	1-palmitoyl-2-stearoyl-GPC (16:0/18:0)	Lipid	Phosphatidylcholine (PC)	52616	LC/MS Pos Late	100008921	2653	762.601	59403-51-9			HMDB07970	35950372	30703524	25759720	44121744	34524532	30844328	38227832	33508050	41299120	28207356	40625924	40286528	42522792	37106800	31150276	26386614	30044928	31394896	37360556	34832660	39015040	46705156	32740336	34052116	35511620	35082984	33445714	36526424	52356432	47318832	33904900	39697712	46887392	52013812	40514320	45249760	38877464
2136	1-palmitoylglycerol (16:0)	Lipid	Monoacylglycerol	21127	LC/MS Neg	100000827	6550	255.233	542-44-9	14900		HMDB31074		4868021	9505150	7566316		6886714	7304000	9262069		11192114				10242876		12498457	5864828		8989200	9436507		7224554	6382307	6648506		11031094		7594679		7526732		5069764	7453477	10608184	11302007	11814046	7789355
1907	1-palmitoyl-GPC (16:0)	Lipid	Lysophospholipid	33955	LC/MS Pos Late	100001263	1525	496.34	17364-16-8	86554		HMDB10382	803942336	679744640	634486784	793409472	744752320	756466752	809974336	653591168	790670208	702586880	785764608	802913472	855900544	701523456	703225856	544905728	746795456	694265664	630983104	754992448	773550272	832516480	581408512	554612672	768975040	617247872	649569600	716520128	890280064	621403200	636923648	750000896	753877632	916927104	611408256	720658688	714891456
1951	1-palmitoyl-GPE (16:0)	Lipid	Lysophospholipid	35631	LC/MS Pos Late	100001567	1544	454.293	53862-35-4	9547069		HMDB11503	8.15365e+06	6052616	6749401	6576321	6805470	6441318	10244675	6202502	7074922	6819872	8702184	7.28841e+06	9771497	6468430	7577776	5513922	6473796	6549282	7072380	7555365	7.32051e+06	9189534	5097112	5403879	9530211	7057512	6620764	7092364	7.66961e+06	6971188	6285565	7.19553e+06	8892181	9789170	8691577	8483672	6446064
1980	1-palmitoyl-GPG (16:0)*	Lipid	Lysophospholipid	45970	LC/MS Neg	100005717	5570	483.273		3300276			83762	107070	95791	112180	122387	73903	111155	59000	229006	211119	76495	70797	109224	78893	73589		63674		57289	71262	84397	66115		97687	116870	120129	89678	89828	95674			57961	138387	178921	98230	111940	65278
1725	1-stearoyl-2-arachidonoyl-GPC (18:0/20:4)	Lipid	Phosphatidylcholine (PC)	42450	LC/MS Pos Late	100001869	2300	810.601	35418-59-8	16219824		HMDB08048	552994048	437805856	417675104	613025472	453104384	330003392	466682560	418645184	506831488	269919488	405945408	554098688	534181728	486983392	421322848	280865280	387354688	418869632	398768800	413738016	479249408	441935296	392722624	401419904	466462656	373907232	467277408	426535680	519339328	506333920	470092576	430544160	494505984	570390464	437860512	539209408	410344480
1791	1-stearoyl-2-arachidonoyl-GPE (18:0/20:4)	Lipid	Phosphatidylethanolamine (PE)	52447	LC/MS Pos Late	100008977	2424	768.554		5289133		HMDB09003	17008472	10122771	10314981	15799569	11671517	12061162	18037734	11887264	15826915	10548421	16671635	14912324	15346708	14365384	11976351	7636098	8528843	11262450	10961701	10996242	11820101	14257812	10555853	10976809	15408498	10781905	12859748	13452423	12007783	13985665	13685570	10800676	15459214	19220680	14272292	17909764	15473147
1885	1-stearoyl-2-arachidonoyl-GPI (18:0/20:4)	Lipid	Phosphatidylinositol (PI)	52449	LC/MS Pos Late	100000616	3000	904.591	383907-33-3			HMDB09815	30886206	26667886	26809350	36438336	28748068	26138604	31276050	27491604	27208196	18120504	35816700	34480080	33921096	27135424	24409476	18639200	24577108	26804580	25827434	30552524	25494108	34422964	22399412	29193876	28178866	22450822	25653842	27492020	34580292	31440836	23928094	27789926	23595512	35388748	23784392	28238430	18937552
1830	1-stearoyl-2-arachidonoyl-GPS (18:0/20:4)	Lipid	Phosphatidylserine (PS)	52235	LC/MS Pos Late	100001872	2565	812.544				HMDB12383		634614	655008	1145009	648555	1016492	880583	1349266	1016341	1119332	1168913	1.61527e+06	1854039	1631414	919076	1647649		522406	1737501	1420961	920242	1891565	1439370	1661472	1301089	2320166	1208128	700775	1.47814e+06	1745604	1989594	1673178	1648294	1621773	1030755	1.74637e+06	1869452
1709	1-stearoyl-2-linoleoyl-GPC (18:0/18:2)*	Lipid	Phosphatidylcholine (PC)	52452	LC/MS Pos Late	100008980	2380	786.601				HMDB08039	1187729920	886675008	830101760	1139527808	983469888	1010994560	1135391104	899351744	1050719488	919202880	1070229504	1031615424	1201595136	963945216	881324032	889586304	870386368	819972160	891839616	916934976	931761600	1019163904	944550400	845362496	1026268992	869484672	942693440	911603264	978227968	837158400	848583616	880434176	984889344	1116503040	931930752	1061764224	861325184
1778	1-stearoyl-2-linoleoyl-GPE (18:0/18:2)*	Lipid	Phosphatidylethanolamine (PE)	52446	LC/MS Pos Late	100008976	2522	744.554		9546749		HMDB08994	17737796	12013819	13671917	12590605	13128132	18418998	23233468	12225593	16382277	22232792	18448204	11934787	18998376	11766737	13368725	14933345	7.80862e+06	7.38696e+06	11550790	11411632	10812354	13615799	13260994	8903687	14394745	13991654	12450187	11501479	8658911	11132055	11332678	9242895	16434927	18875980	15288081	16889108	12636470
1868	1-stearoyl-2-linoleoyl-GPI (18:0/18:2)	Lipid	Phosphatidylinositol (PI)	52468	LC/MS Pos Late	100008994	3185	880.591				HMDB09809	4344105	3774219	3477862	4437782	3964246	5287536	5673622	4404313	4156210	6402558	5979792	4965991	5103667	3414459	4360149	5598123	3301214	3178620	3698776	4271925	2927246	4934367	4999992	4238383	4296620	3933843	4008289	4271391	3619010	2862807	3136757	3815823	4.13282e+06	5020693	3929232	4419972	1.85911e+06
1704	1-stearoyl-2-oleoyl-GPC (18:0/18:1)	Lipid	Phosphatidylcholine (PC)	52438	LC/MS Pos Late	100008904	2644	788.616	56421-10-4			HMDB08038	175461344	179796080	135068976	178595808	152980224	139895312	184713216	161722464	137987280	111627056	226993264	179852848	245747328	133430080	120302608	134147664	129660248	176783040	193295824	177959328	150761504	277414048	138887600	184879968	202065536	159616976	142228048	132086080	164115648	208869248	111464448	134335088	185044192	185939200	184957056	161771232	138911296
1772	1-stearoyl-2-oleoyl-GPE (18:0/18:1)	Lipid	Phosphatidylethanolamine (PE)	42448	LC/MS Pos Late	100001856	2858	746.569				HMDB08993	1519519	1044269	1085018	1082468	1176834	1285309	2049925	1207151	1216774	1853509	1.63197e+06	1206953	2108397	867497	1263658	1460417	660096	796536	1396037	1521331	1176843	1609996	1324300	856716	1723371	1567133	1275140	944664	973083	961588	905789	1052021	1899481	1738735	1977002	1652763	1408329
1914	1-stearoyl-GPC (18:0)	Lipid	Lysophospholipid	33961	LC/MS Pos Late	100001271	1606	524.371	19420-57-6	497299		HMDB10384	578386944	408338656	346287520	507321696	496570432	385528128	502387328	429389920	502480288	389692128	468638880	537492928	541479296	477398208	392933632	370038144	495700320	405652352	432458048	452558496	472443264	480237888	378518720	392821344	484094496	374801376	407808448	406769984	534440704	450980736	429448768	439775648	426196064	542094336	390666464	481225184	387290944
1956	1-stearoyl-GPE (18:0)	Lipid	Lysophospholipid	42398	LC/MS Pos Late	100001461	1626	482.324	69747-55-3	9547068		HMDB11130	7406610	5040120	5569983	7590503	6446961	5497640	8009190	5265590	7350646	5661760	7158471	6.72064e+06	7326652	5676889	5917793	5217932	5649080	4812850	6390090	6068708	5849051	6455125	4766691	4874682	7.26387e+06	7356295	6698389	6617671	8267892	6351116	6594967	7052766	7.68938e+06	8215173	7.10554e+06	8.12873e+06	5056395
1990	1-stearoyl-GPI (18:0)	Lipid	Lysophospholipid	19324	LC/MS Neg	100000656	5794.3	599.32	796963-93-4			HMDB61696	347724	163010	150375	265060	221587	196644	254948	215182	253062	170917	228536	290396	249857	233265	145506	140189	179531	189494	196277	209601	207338	191268	128310	169490	277503	152417	188848	192750	207054	230723	221757	133891	128983	270269	204322	207486	112478
3652	2,3-dihydroxyisovalerate	Xenobiotics	Food Component/Plant	38276	LC/MS Polar	100002417	1050	133.051	1756-18-9	677	C04039	HMDB12141	124357	128820	105407	148862	135738	76459	248772	147185	220397	130566	120947	101376	173017	139908	117249	142922			142186	132473	191383	75802	165971		172007	88274	180036	51370			74065	175062	252381	121753	148367	123570	65721
3656	2,8-quinolinediol sulfate	Xenobiotics	Food Component/Plant	48691	LC/MS Neg	100004321	2612	239.997					2353053	3319377	2681539	1595486	770138	1734398	60207	2963114	1479404	1900075	785074	2958977	4714307	290307	1714064	2490009	630888	3698030	1430517	3545430	3259397	38948	3468811	2276899	2957676	153984	2797168	4261567	1726474	1305598	1701654	2479071	2370250	3199107	1500771	2547823	469691
94	2-aminoadipate	Amino Acid	Lysine Metabolism	6146	LC/MS Polar	381	3500	160.062	542-32-5;1118-90-7	469	C00956	HMDB00510	411405	383520	397523	327889	418557	282590	463198	402295	487349	302795	367226	303839	464849	518729	357211	146116	339943	327766	372937	307410	698888	487936	376550	408901	290266	147173	353344	377814	285994	218018	368574	399785	274669	402426	385097	80171	293760
1288	2-aminoheptanoate	Lipid	Fatty Acid, Amino	43761	LC/MS Pos Early	100004542	3160	146.118	1115-90-8	227939			586632	442693	731483	965310	1431121	1019296	733676	695283	726649	1119938	972118	1075502	251903	560506	959139	1296321	1123741	1.0401e+06	619774	916123	884468	747329	1337056	905159	478069	739633	1148174	1128685	1294320	1314523	361625	394874	502383	925105	1398770	1428413	2607607
1293	2-aminooctanoate	Lipid	Fatty Acid, Amino	43343	LC/MS Neg	100004227	3385	158.119	644-90-6	69522		HMDB00991	70906	125272	157175	131291	197096	111093	57457	108928	110951	121367	96306	147239	89872	155799	97405	143219	103637	141388	90419	105552	149140	114971	129402	96488	116224	88518	120387	101268	100208	97284	72406	112066	85085	120286	97396	102142	131415
4395	2-aminophenol sulfate	Xenobiotics	Chemical	43266	LC/MS Neg	100004322	1677	188.002		181670		HMDB61116	3980097	6331809	4553174	3682814	5411144	3653383	4226067	7283218	5679266	7506411	4470798	4734528	8890182	6398400	8819605	4856433	2400145	3579636	5696096	7.14397e+06	7499075	4254689	5395571	2995606	6466955	5301460	7524253	5356600	3604279	2233963	5413361	4442502	7330310	5659392	7533838	4243896	4437167
2156	2-arachidonoylglycerol (20:4)	Lipid	Monoacylglycerol	19266	LC/MS Neg	100000584	6170	303.233	53847-30-6	5282280	C13856	HMDB04666	290436	301612	218873	254506	126505	263748		160073		134641			190633		167041	216132	209820			139869		181679	136669	299611	235759	484666	240712		204293	230038	139216	138641	518080	398364	261411	160843	261348
3319	2'-deoxycytidine	Nucleotide	Pyrimidine Metabolism, Cytidine containing	15949	LC/MS Pos Early	100000125	2193	228.098	951-77-9	13711	C00881	HMDB00014	10193475	8212992	11959055	9573467	9558290	9184266	11691241	8573147	9845146	8430172	9762693	8031754	7671718	11789855	10955650	8842215	8882302	9717345	9131408	8722549	8725660	9053262	8417493	8006103	8057306	16300305	8539966	9362908	9562460	10658470	10794930	10974226	17359746	12028597	12936938	17755972	16544889
3296	2'-deoxyuridine	Nucleotide	Pyrimidine Metabolism, Uracil containing	1412	LC/MS Neg	536	1586	111.02	951-78-0	13712	C00526	HMDB00012	1362346	890734	1293311	1522544	1312979	1261502	918738	771032	1584677	1405181	918105	1059937	1017702	1025939	1044830	1031538	1385336	1103161	861611	912006	1269149	1089828	884208	689627	990119	2035555	1088974	1.04439e+06	1619530	1480751	935542	1332506	1.7684e+06	1472482	1732753	2233216	2419008
2158	2-docosahexaenoylglycerol (22:6)*	Lipid	Monoacylglycerol	48675	LC/MS Neg	100006352	6050	309.222				HMDB11557		51643	101327	108324	102214	76952		98375		79409	23699	61131		90546		88221		75923		40638		38068	87425	43076	86618	73061		86485	166580	91551	32720		193121	219705	60027	95694	69321
299	2-hydroxy-3-methylvalerate	Amino Acid	Leucine, Isoleucine and Valine Metabolism	36746	LC/MS Neg	100001541	1800	131.071	488-15-3	164623		HMDB00317	911957	1480040	1.02948e+06	1010662	1121453	948480	2306973	955416	1484716	1330916	1035993	1557069	2275064	1277420	1578387	1647813	1134461	881746	1422148	1082881	1175845	1148632	2690158	847419	1264321	838352	735155	1257349	488255	579905	1840808	1270566	276556	1612707	939295	799026	1220797
1238	2-hydroxyadipate	Lipid	Fatty Acid, Dicarboxylate	31934	LC/MS Polar	100001153	3000	161.046	18294-85-4	193530	C02360	HMDB00321	335838	526681		421837	501566	226720	586878	524717	507099		418645		430293	542414	449870		321832	276012		463716	335137		354735	252171		220593	495636	1408692		164236	374793		364832		456990	273027	291667
412	2-hydroxybutyrate/2-hydroxyisobutyrate	Amino Acid	Glutathione Metabolism	52281	LC/MS Polar	100008928	1258	103.04					14888699	6659587	17087892	12743384	17523528	12922358	13635100	12169948	13617477	10217059	16139684	12917853	17190976	15753714	18535158	10469275	21246544	18307292	15778111	15330668	20461714	11976282	18985668	13906108	12289787	10237411	15132027	13020300	10843223	14515615	17571440	13557072	14076284	11860435	13316408	13109777	21907660
1395	2-hydroxydecanoate	Lipid	Fatty Acid, Monohydroxy	42489	LC/MS Neg	100004089	4840	187.134	5393-81-7	21488			417880	374071	877940	468821	440922	461588	287181	532129	383387	775509	362500	370536	405850	342054	454408	677829	390617	300600	316721	544736	372413	438097	524695	285688	414501	767303	478195	477458	323528	449995	616980	501388	382944	736178	636808	425738	417199
1234	2-hydroxyglutarate	Lipid	Fatty Acid, Dicarboxylate	37253	LC/MS Polar	100002070	3352.8	147.03	40951-21-1	43	C02630	HMDB00606	7924921	9971676	11012769	6652837	8691798	6501726	9197574	8798266	10491436	9057742	8574538	5895237	9645808	13249480	6360205	5399872	7134887	7558623	8326298	8020681	15229861	6854834	8913628	8.2264e+06	7146647	8.14904e+06	9861257	6814842	7000453	5756349	9892338	7661941	8604266	7919272	8887232	5684322	7811151
3456	2-hydroxyhippurate (salicylurate)	Xenobiotics	Benzoate Metabolism	18281	LC/MS Neg	1869	2184	194.046	487-54-7	10253	C07588	HMDB00840	125723	101967			197757	99416		60581		283871	240774		90919	75155	111959	183140		94804	111530		124477	82931	180259	105023	89443	130530	134614	158153		85857	75180		137115		162975		89604
1394	2-hydroxyoctanoate	Lipid	Fatty Acid, Monohydroxy	22036	LC/MS Neg	100000743	3736.8	159.103	617-73-2	94180		HMDB02264	394279	528375	741483	533591	746410	613204	365480	530478	486754	701233	445144	607277	642400	631914	514565	656537	471996	469757	485780	478433	632281	569823	587945	418566	556033	776173	627666	428893	390292	451480	485161	457154	559851	529247	752424	491976	499144
1398	2-hydroxypalmitate	Lipid	Fatty Acid, Monohydroxy	35675	LC/MS Neg	100001579	5511.2	271.228	764-67-0	92836		HMDB31057	2718738	2772830	3273752	3053303	3290174	3375657	2.27276e+06	2923079	3832714	2872929	3808066	3051682	2850561	3848568	2.46096e+06	3105782	3225945	2735183	2.90008e+06	2347724	3849305	2.5567e+06	2.67193e+06	2853446	2638047	3.17449e+06	3112850	2.77904e+06	2671221	2961889	3045967	2965226	2.95081e+06	4523430	2811920	3185767	3731321
1399	2-hydroxystearate	Lipid	Fatty Acid, Monohydroxy	17945	LC/MS Neg	1239	5695	299.259	629-22-1	69417	C03045		898981	933042	970812	1177660	964544	935297	929719	1.15043e+06	1155929	786132	1.01742e+06	894092	751222	1.046e+06	1.32005e+06	982043	1.13062e+06	1.32859e+06	769462	888804	1.34406e+06	966910	1.07042e+06	809834	1.18649e+06	902401	987348	815459	950804	857271	1.12556e+06	806611	717161	1065806	735721	1091677	912442
2155	2-linoleoylglycerol (18:2)	Lipid	Monoacylglycerol	32506	LC/MS Neg	100000987	6250	279.233	3443-82-1	5365676		HMDB11538	26094542	19454660	6.95508e+06	13159198	30315472	14466586	11045206	20692586	20341118	15580400	11028465	13980135	33108102	27723188	14182307	7.90001e+06	18882308	20449840	12183555	13329463	15170584	12779391	11026156	13263990	34333236	9878631	12105836	11825125	29771872	19138468	13472101	15668789	68760728	42442440	36180196	23290388	22966436
281	2-methylbutyrylcarnitine (C5)	Amino Acid	Leucine, Isoleucine and Valine Metabolism	45095	LC/MS Pos Early	100001509	3035	246.17	31023-25-3	6426901		HMDB00378	940786	1251478	2385982	1846872	1728538	1851287	1.0902e+06	1376368	1404806	2057607	1782366	1662490	1366788	2884106	1640807	2634695	2196089	1394571	1607827	1882074	1800930	1543448	2241929	1222777	1210415	1718647	2092948	2541183	1405071	1.72489e+06	2057380	2020028	2371310	1916393	2396048	1972317	1964020
282	2-methylbutyrylglycine	Amino Acid	Leucine, Isoleucine and Valine Metabolism	31928	LC/MS Neg	100001155	1884	158.082	52320-67-9	193872		HMDB00339	183022	125632	110755	152487	143699	80112	158346	85946		79254	169273	161845	195399	247332	115381	74403	243234	156769	130278	123571	257167	140423	113715	161018	109050	56519	173327	142544	219326	152798	149885	174245	138458	171107	91377	103984	259379
2154	2-oleoylglycerol (18:1)	Lipid	Monoacylglycerol	21232	LC/MS Neg	100000943	6500	281.249	3443-84-3	5319879		HMDB11537	12465691	14188365	4065536	8853636	14306694	6499136	10081867	12219400	8404101	7684994	7365754	9056073	25824700	13725609	5789539	4328272	7778332	12043209	10991605	15031152	7.86925e+06	10965614	5800345	8.30445e+06	25235792	6803099	6630027	6647492	18145280	10296977	6873093	8.05084e+06	31725460	19936338	30750554	11594631	11526160
3320	2'-O-methylcytidine	Nucleotide	Pyrimidine Metabolism, Cytidine containing	57554	LC/MS Pos Early	100010895	2411	258.108	2140-72-9	150971			2320137	1386974	2181509	1805126	2166466	1803931	1719098	1582116	2012081	2415991	1838511	1.74363e+06	1860329	2024482	1720125	1967371	1875396	2150545	2379238	1470511	2100003	1.74217e+06	1884596	1578022	1810772	2674584	1812702	1929112	1513906	2481164	2145936	2125090	2427650	1777310	2143077	1.83001e+06	1750836
3660	2-oxindole-3-acetate	Xenobiotics	Food Component/Plant	40479	LC/MS Neg	100003109	2076	190.051	2971-31-5	3080590		HMDB35514	784432	572634	152086	317018	992970	399989	533654	581510	502505	575099	612832	421876	880904	1577645	457782	470015	998852	407870	1168550	321217	410712	2013397	671731	954255	548609	957124	314441	1.02498e+06	309800	744662	1424274	326292	938789	257940	736755	227303	726439
96	2-oxoadipate	Amino Acid	Lysine Metabolism	38347	LC/MS Polar	92	2633.1	159.03	3184-35-8	71	C00322	HMDB00225	808987	693526	937312	802020	834917	396350	1.0001e+06	798115	728190	569994	727553	618566	1206960	863255	762267	379004	788938	728480	860337	743778	1239256	610088	778960	874858	573683	368148	868659	813955	416369	368775	1177375	859150	399432	604961	405202	376802	454784
349	2-oxoarginine*	Amino Acid	Urea cycle; Arginine and Proline Metabolism	55072	LC/MS Pos Early	100002784	1760	174.087	3715-10-04	558	C03771	HMDB04225	4569539	4672968	2320324	3229340	4752301	2870673	5284312	3.84765e+06	4008437	4.10773e+06	5185582	4310018	4.00597e+06	4285551	4436422	4307089	3038968	3547267	5391045	4809343	3794894	4385719	4656159	3242904	3864280	3165018	4792814	4297994	2275298	3480339	4553387	4525992	4746121	3.78777e+06	6176069	3.61744e+06	2456441
2152	2-palmitoleoylglycerol (16:1)*	Lipid	Monoacylglycerol	52432	LC/MS Neg	100008953	6016	253.217				HMDB11565	706506	1226261	259682	507693	1043975	644975	934599	1335333		509816	1200877	857371	2963929	975739	606193	420541	854237	1447940	609076	1184122	542923	1084536	695316	802364	1742122	417089	483953	176120	1655768	967823	562857	493788	2771484	1686640	1.75919e+06	768512	1268195
1910	2-palmitoleoyl-GPC (16:1)*	Lipid	Lysophospholipid	47118	LC/MS Neg	100001561	5720	568.326				HMDB10383	247923	403771	209195	267253	355710	310789	381346	345872	184926	341235	558095	296779	516156	285727	290768	355594	314581	376396	252226	312166	306374	413544	153053	295860	344951	203546	264149	240022	229342	329320	192823	216144	254739	286556	384442	180322	262407
2151	2-palmitoylglycerol (16:0)	Lipid	Monoacylglycerol	33419	LC/MS Neg	100001048	6400	255.233	23470-00-0	123409		HMDB11533		1240095				1236993	2239234									2321375	2839338					2584950	1474517	2163591		2311167				2189868		2104421				3760661	3684505
1908	2-palmitoyl-GPC (16:0)*	Lipid	Lysophospholipid	35253	LC/MS Neg	100001562	6215	570.341		15061532		HMDB61702	7.76133e+06	8.3877e+06	5561739	8832071	9116251	5758511	8.35756e+06	6110494	18510982	5161077	7130762	9481127	20477702	8491813	8993938	5850681	7194905	9156186	6124846	6770032	14726385	9964586	5310980	6073512	10890723	5882022	7.87315e+06	8.17697e+06	8519573	6686851	7133812	6380372	9695383	12595967	14300776	7223018	6120750
1957	2-stearoyl-GPE (18:0)*	Lipid	Lysophospholipid	41220	LC/MS Neg	100003901	6350	480.31				HMDB11129	1831035	292496	410239	953216	1375285	1.01844e+06	1462537	1.00915e+06	1358748	1.91672e+06	847380	502073	1423388	1056944	580471	448756	1.01914e+06	389798	765542	665652	591865	384914	573675	382239	325995	295067	529355	760050	1289381	596608	503677	299053	325867	2.05562e+06	572892	797625	1319104
3533	3-(3-hydroxyphenyl)propionate	Xenobiotics	Benzoate Metabolism	35635	LC/MS Neg	100001624	1980	165.056	621-54-5	91	C11457	HMDB00375	939350	327543	5241710	905246	885330	2172693	1073934	3048699	1147630	2812465	2002181	1129789	433837	2500492	2455480	268336	167381	79130	1665492	771629		1.95531e+06	407548	1.63697e+06	172777	1809119	1506641	218392	766584	235683	197200	658088	1544842	297830	1002159	552059	196231
3530	3-(3-hydroxyphenyl)propionate sulfate	Xenobiotics	Benzoate Metabolism	45415	LC/MS Neg	100005391	1294	245.013	86321-32-6	187488			26694538	10768642	30420174	20159476	19885640	20791354	27141216	33303700	20325308	22067072	27262752	26301680	13026995	36323188	35836736	2774318	5282206	3095113	33537636	16054485	5498006	25609776	9351167	23491788	4946002	18426124	24773860	7.96385e+06	17379812	3350613	6988011	18069520	25473086	9126233	21587608	10968491	4829801
134	3-(4-hydroxyphenyl)lactate	Amino Acid	Tyrosine Metabolism	32197	LC/MS Neg	240	1379	181.051	6482-98-0	9378	C03672	HMDB00755	5644693	7643133	9712328	8122282	8.02874e+06	6165648	5845996	5907467	4.03882e+06	7733354	6400611	4533301	11629439	10500728	7680381	7174943	6291013	6313199	10194965	9799370	8632374	6468306	8.02717e+06	5967166	8079937	9414355	6624409	5492306	5395625	4501316	6987450	8.2247e+06	10970468	5672590	8050955	5574397	6048673
3534	3-(4-hydroxyphenyl)propionate	Xenobiotics	Benzoate Metabolism	39587	LC/MS Neg	100002914	1670	165.056	501-97-3	10394	C01744	HMDB02199	113923	157934	1113527		113768	473913	84313	286279	177700	298637	261649	692172	118740	437485	515991	111283			1847778	205695		1050155	135650	135971	68641	139914	1.04452e+06	92946			167364		202259	108072	181662	378155	128380
1318	3,4-methylene heptanoylglycine	Lipid	Fatty Acid Metabolism(Acyl Glycine)	55012	LC/MS Neg	100010861	3818	198.114					1317290	1642885	1400846	1619681	1527910	1.0367e+06	731169	1510359	1520980	762527	902150	1684521	1.75293e+06	1.83014e+06	1686779	940743	1419521	1401628	1186092	1371802	2149263	988756	1573679	1269846	1721122	1210821	1969419	1459102	1331569	1.59677e+06	1416083	1306716	1380766	1.73237e+06	1185662	1437503	2070230
2600	3-dehydrocholate	Lipid	Secondary Bile Acid Metabolism	43835	LC/MS Neg	100001062	5050	405.265	2304-89-4	159655		HMDB00502	64916		625261	43337		158728				303460						324275										608187	27174	21949		87878				68980	81863		35460
286	3-hydroxy-2-ethylpropionate	Amino Acid	Leucine, Isoleucine and Valine Metabolism	32397	LC/MS Neg	100001170	975	117.056	4374-62-3	188979		HMDB00396	269014	196597	195054	167444	123367		159200	80926	156674			100698	201434	114017	368961	95413	316434	161094	192137	92783	230560	165743	265232	108938	185332	110974	139189	128909		344555	278441	206712	203993	193283	98867	171076	273184
2355	3-hydroxy-3-methylglutarate	Lipid	Mevalonate Metabolism	531	LC/MS Polar	112	2700	161.046	503-49-1	1662	C03761	HMDB00355	3092900	2027762	2468536	2555500	2353846	1363784	2414483	2744247	3502281	1764691	2461095	2547609	4570626	3829150	2150898	1614434	2974653	3181826	2771846	2465507	8005179	1623810	2420811	3541169	2.60627e+06	1822195	2958279	4352986	2.62749e+06	2772845	2466338	1711655	3571851	2568215	2514828	2048978	4345292
1380	3-hydroxybutyrate (BHBA)	Lipid	Ketone Bodies	542	LC/MS Polar	254	1443.3	103.04	625-72-9	441	C01089	HMDB00357	27628816	20213228	21519504	28522796	21602072	18137024	17793064	24154538	21694228	10743914	16953696	24801652	30081414	32483826	29725880	13652969	35548924	29789260	25005164	20296748	46429460	22877798	38085704	33163684	21045216	10811736	20317734	33676800	25327004	35757936	36307960	16850900	17985104	25163746	14912027	21702234	52820416
1326	3-hydroxybutyrylcarnitine (1)	Lipid	Fatty Acid Metabolism(Acyl Carnitine)	43264	LC/MS Pos Early	100003926	2400	248.149		53481617		HMDB13127	8225199	11777909	23649428	15316770	14036139	11302821	7493720	11889050	9800673	9288372	11045202	10281756	10313580	18347964	12873758	10687392	22893320	16388152	11646214	11050881	20977736	9948985	21993508	15373540	7245326	5952685	10929093	22827276	16041100	20621594	13008476	7537461	8847569	10371333	9099067	8462631	21839376
1327	3-hydroxybutyrylcarnitine (2)	Lipid	Fatty Acid Metabolism(Acyl Carnitine)	52984	LC/MS Pos Early	100009271	2340	248.149				HMDB13127	7485566	9087308	21277720	8832381	10136712	12244964	7325916	9245246	8372599	10829927	12921004	6788928	10556373	17706368	11858398	13070502	10766051	9110190	9005554	9946976	14159132	8372277	15259123	12073168	7183519	9045635	10008772	10499762	9061425	12548018	7562911	7.06348e+06	9187540	10574681	9020218	8364694	16165966
3929	3-hydroxycinnamate sulfate	Xenobiotics	Food Component/Plant	48409	LC/MS Neg	100006094	1338	242.997	86321-30-4	6443141			558123	223338	613764	587330	583319	407296	591692	1649965	399112	220385	1227180	823245	254715	1726104	1950467		87199		1336068	486448	135532	1.01553e+06	294176	613279	94650	376054	968656	140651	536152	118147	92900	575418	708974	155183	774148	233363	95165
1405	3-hydroxydecanoate	Lipid	Fatty Acid, Monohydroxy	22053	LC/MS Neg	100000997	4634.7	187.134	5561-87-5	26612		HMDB02203	410953	592226	1109783	641671	587213	774080	338602	449903	391734	385539	810370	363919	748915	606027	442752	853045	541266	692502	654478	656609	711317	417502	1087766	567714	794592	560761	515131	554688	700755	696023	698002	483473	352177	1121201	285945	614767	1201049
1403	3-hydroxyhexanoate	Lipid	Fatty Acid, Monohydroxy	53230	LC/MS Neg	100006367	1725	131.071	10191-24-9	151492			760512	705053	1485783	646096	1043668	959947	420343	431685	584505	522330	588460	630357	809939	743697	1106206	1096101	806536	611452	440269	477863	1078117	610025	897657	863229	756108	939634	571628	725852	675713	941585	575311	693072	388274	994709	382431	680649	1656470
303	3-hydroxyisobutyrate	Amino Acid	Leucine, Isoleucine and Valine Metabolism	1549	LC/MS Polar	111	1619	103.04	2068-83-9	87	C06001	HMDB00336	11045318	9616722	8566802	9489616	7933485	7069598	9334338	8394291	5531562	6909604	6596552	6583450	16066603	10542544	9300435	4628331	12068422	6145795	14319884	7.80897e+06	8380027	6264019	9520193	7869861	7711077	6089242	7564295	7898179	5350511	8829380	14538581	6824947	9553774	7035959	6175397	6781332	14880879
1407	3-hydroxylaurate	Lipid	Fatty Acid, Monohydroxy	32457	LC/MS Neg	100001112	5175	215.165	53941-38-1	94216		HMDB00387	909376	989318	1973301	1094346	822873	1310062	755156	726891	624775	473305	1751462	612300	1271337	985979	619906	1.95766e+06	1055669	1371379	1405880	1188842	940765	598279	2329152	962766	1265278	878091	646651	779727	915929	1082608	1292264	566205	575364	1466291	548715	1100178	2394910
1404	3-hydroxyoctanoate	Lipid	Fatty Acid, Monohydroxy	22001	LC/MS Neg	100000773	3446	159.103	88930-08-9	26613		HMDB01954	552948	728809	1358014	763750	693433	798256	363061	592270	522656	375794	647712	666433	760153	802304	611775	729567	679288	715138	536258	635943	826600	616536	976264	760799	831412	820210	699732	847648	721220	863695	638304	635325	490493	1152969	426011	723649	1385528
1406	3-hydroxysebacate	Lipid	Fatty Acid, Monohydroxy	31943	LC/MS Neg	100001145	1282	217.108	73141-46-5	3017884		HMDB00350		184780					129718	62777	93982			185255		76701		130353	61832	434698				61570	96403	68324	148158			149218		112437	146697	89664				64663	92838
238	3-indoxyl sulfate	Amino Acid	Tryptophan Metabolism	27672	LC/MS Neg	100000467	2222.2	212.002	2642-37-7	10258		HMDB00682	94790200	33414602	51944632	112357352	71126344	26557704	72880400	75410592	75552648	76101016	61814776	49852432	89127888	94831256	45795080	33978184	64829512	55830288	50336936	99753616	44659576	52664528	24954658	29367034	49680492	23866244	49940612	53149820	46751268	31877392	74560704	54914152	34709964	53522752	48967368	53081568	39830808
151	3-methoxytyrosine	Amino Acid	Tyrosine Metabolism	12017	LC/MS Pos Early	1342	2555	212.092	300-48-1	1670		HMDB01434	273522	259350	166088	282693	260309	171837	262702	285276	228062	241814	300653	295195	278001	375745	270203	184730	228886	168512	282830	264185	321462	251790	197557	155492	220775	255148	327714	296793	221488	200046	293986	248699	233127	264139	271833	195535	195094
298	3-methyl-2-oxobutyrate	Amino Acid	Leucine, Isoleucine and Valine Metabolism	44526	LC/MS Polar	100000936	911	115.04	3715-29-5	49	C00141	HMDB00019	7.80238e+06	5090324	8933415	10170941	6422136	7515709	7.17014e+06	6846918	8422682	5609428	6824167	8301820	9556149	4887963	7.87581e+06	7373135	9706729	9308895	6346319	8001060	7027711	8.31931e+06	7.52228e+06	7071504	6.92413e+06	5429477	7100869	7427777	5019639	8153436	8093385	7321499	5471273	8585417	6325224	10480148	8291325
278	3-methyl-2-oxovalerate	Amino Acid	Leucine, Isoleucine and Valine Metabolism	15676	LC/MS Neg	100000036	2064.2	129.056	1460-34-0;51829-07-3	47	C00671	HMDB03736	10347374	6960300	9629959	14310412	10413879	9082336	6905448	9472326	11611563	5757967	10169220	11882578	15201555	7119211	11238459	7482001	17650520	12441955	7877140	8833095	13291204	13261502	9101756	9520119	9865949	5329962	7499905	10289884	7976620	10540390	11612065	10752186	7439373	10717756	7732974	12124242	11130674
258	3-methylcrotonylglycine	Amino Acid	Leucine, Isoleucine and Valine Metabolism	31940	LC/MS Pos Early	100001149	1980	158.081	33008-07-0	169485		HMDB00459	1039378	670963	392538	683644	859085	403456	937252	671362	842477	463783	770192	733133	1152862	975721	784717	486601	1061211	748572	1283258	714697	1005089	698710	759907	720507	736817	426250	950431	982745	747730	631603	783281	681530	809281	604368	879512	982193	1016402
3311	3-methylcytidine	Nucleotide	Pyrimidine Metabolism, Cytidine containing	35132	LC/MS Pos Early	100001466	2176	258.108	21028-20-6	159649			365209	239226	305412	198685	154111	315656	283273	276991	287511	180022	287699	318157	200096	269261	374932	340287	364952	324016	375829	60874	305341	346129	536163	274236	208563	428547	253749	355687			371353	353867	358491		338556	312362	225189
63	3-methylhistidine	Amino Acid	Histidine Metabolism	15677	LC/MS Neg	100000042	906.3	168.078	368-16-1	64969	C01152	HMDB00479	504977	511502	426573	843666	843282	394513	455721	545301	369133	354988	458247	796579	772881	509869	427612	247558	536355	679243	356244	566798	809549	731067	362967	460273	742197	341150	706827	844675	795535	686306	524218	534863	703269	727792	782516	668920	1138868
3535	3-phenylpropionate (hydrocinnamate)	Xenobiotics	Benzoate Metabolism	15749	LC/MS Neg	100000010	2860	149.061	501-52-0	107	C05629	HMDB00764	1733762	2477009	2240447	1422537	2805395	2765199	1293650	1350936	1441591	8242998	657677	454123	3818081	699558	1.43242e+06	21135596	3026066	3417776		3.41571e+06	4.12366e+06	519236	4456313	776998	3689726	9201217	410417	5289547	729256	3287814	4700756	2310294	2280021	3.57634e+06	1975295	529009	3372821
879	3-phosphoglycerate	Carbohydrate	Glycolysis, Gluconeogenesis, and Pyruvate Metabolism	1414	LC/MS Pos Early	132	590	187	80731-10-8	724	C00597	HMDB00807	335222	485129	325307	379023	528494	344425	355432	443376	559717	597049	409646	470841	865818	862717	568735	941268	390553	446795	1085111	734528	1.04213e+06	913672	416968	976793	544397	1234568	667807	381615	801160	969203	969262	854258	1150289	685385	895910	922118	872618
3299	3-ureidopropionate	Nucleotide	Pyrimidine Metabolism, Uracil containing	3155	LC/MS Pos Early	1053	875	133.061	462-88-4	111	C02642	HMDB00026	13757290	6150253	13610533	10437434	11592250	8802151	6989229	9765027	17991864	13463939	7336464	8559437	8626942	14100693	9787079	4815698	8243141	7358289	6755318	10141785	15594664	8369333	6075127	8626380	5614218	16421007	10266731	11909626	15969630	16463380	8659745	7738362	26411972	19881682	22224204	20239168	27265926
395	4-acetamidobutanoate	Amino Acid	Polyamine Metabolism	1558	LC/MS Pos Early	1113	1350	146.081	3025-96-5	18189	C02946	HMDB03681	1741834	690002	1189578	1224699	1179234	553269	926615	703998	1248397	642961	792746	948654	1017427	1070589	924788	1655093	1176566	484777	1065232	1104806	855660	671099	1035150	749630	1338926	1617535	758542	1711038	1273762	641075	725911	888240	1147034	1492230	898078	1423727	756268
3891	4-allylphenol sulfate	Xenobiotics	Food Component/Plant	37181	LC/MS Neg	100001868	3805	213.023					511323	680267	361837	830643	531840	712882	465008	731712	238963	1067545	422194	505650	266715	339058	384836	715739	889445	782573	1047274	526621	600937	408669	334216	219144	465179	336740	374639	738991	406723	405429	634390	603534	566323	242619	567020	150767	390303
3950	4-ethylphenol glucuronide	Xenobiotics	Food Component/Plant	52937	LC/MS Neg	100009049	3167	297.098					594018	1030098	1986999	1725145	871288	1095562	213647	1335930	37727	989347	363598	872377	957820	1282089	722865	3.06336e+06	1413685	1223235		5960788	2965427	444666	981251	605005	1044019	409748	3415404	533094	593567	1199739	1393138	1914113	1252185	400266	1923422	326674	293120
3497	4-ethylphenylsulfate	Xenobiotics	Benzoate Metabolism	36099	LC/MS Neg	100001756	3580	201.023	123-07-9		C13637		22765058	33775588	30078984	35181888	23825642	21854648	9916154	27393976	2055524	14667155	8396553	18383496	15951275	18317356	15135483	41014196	43081332	30376584	1737127	80364496	51902812	11775278	30505960	15379282	28477430	7590264	61172196	13912476	18392320	24726060	24345800	45440732	39015576	14161822	56879784	14783133	12200144
398	4-guanidinobutanoate	Amino Acid	Guanidino and Acetamido Metabolism	15681	LC/MS Pos Early	100000096	2320	146.092	463-003;463-00-3	500	C01035	HMDB03464	22863930	31897996	22868724	22567500	30344382	27900740	39584744	33809124	29396990	53079176	42004832	24355916	26351720	38772240	39115088	33456988	16427641	19229332	39544300	36560488	33246598	24311958	30995926	27405344	32755912	32623010	40714440	31127486	19557054	16763185	17452472	29712330	64572384	30965724	61364204	30588016	17897148
3984	4-hydroxycinnamate	Xenobiotics	Food Component/Plant	36770	LC/MS Polar	100001675	1200	163.04	501-98-4	637542	C00811	HMDB02035	1594783	988534	1555819	1121106	1410440	989304	2432997	1065882	1708584	2117002	1094602	831676	1887068	1006174	1460203	1036411	552153	405864	2148480	1196816	1040132	829817	1092899	246881	1281508	1521587	1321588	818823	571040	380220	828545	1037307	2712468	837531	2126214	2243717	3588073
177	4-hydroxycinnamate sulfate	Amino Acid	Tyrosine Metabolism	48410	LC/MS Neg	100006095	1000	242.997	376374-66-2	6070438			242834	145544	505773	211352	384326	251639	284408	288957	253739	270420	284291	231723	576363	392726	213832	80051	81316		356878	280157	146261	132411	129241	36326	163024	135610	266561	91179	186589	28896	115918	136394	373209	270195	244267	316950	955295
3458	4-hydroxyhippurate	Xenobiotics	Benzoate Metabolism	35527	LC/MS Neg	100001423	1475	194.046	2482-25-9	151012		HMDB13678	800061	196285	216541	366655	590045	129939	717966	378857	666793	182722	566355	428774	722926	585859	318264	56922	251253	111202	479935	458027	270063	218370	184898	53769	291249	283507	262638	151749		171199	181073	229824	245133	233694	324012	203131	313668
131	4-hydroxyphenylpyruvate	Amino Acid	Tyrosine Metabolism	1669	LC/MS Neg	1141	1690.1	179.035	156-39-8	979	C01179	HMDB00707	5601501	5812258	4183761	5960941	5.74584e+06	3334184	6267383	3933373	3598847	5511397	4055391	3629265	10604426	4381673	5.54131e+06	3467610	4270820	4308616	8.22052e+06	8359589	5467718	5088584	4030038	3206527	5807901	5995523	5103335	3819449	2584033	2.97846e+06	5042818	5564174	7564944	3721089	5858743	4052903	3262127
244	4-methyl-2-oxopentanoate	Amino Acid	Leucine, Isoleucine and Valine Metabolism	22116	LC/MS Neg	100000551	2170	129.056	816-66-0	70	C00233	HMDB00695	8.05398e+06	5427496	8547415	11138169	8636686	9471702	6080639	9317820	10255235	5549967	8.044e+06	9940493	13512187	5830273	10601577	6365782	14209210	10680142	7.20767e+06	7878339	11412050	11766431	8.20052e+06	7.9531e+06	7973683	5185830	6582299	8.35676e+06	6706760	8383195	8088769	7776222	8284523	7.87489e+06	7.69175e+06	12553675	8122273
3487	4-methylcatechol sulfate	Xenobiotics	Benzoate Metabolism	46146	LC/MS Neg	100004111	2665	203.002					1251268	1865843	1579417	1472317	890596	683788	890240	999723	976861	1562240	901421	1503158	1631987	408810	1.42896e+06	972032	840469	577583	1270780	2007850	1347068	907195	1633444	707132	1277358	946025	2134426	1472219	781298	718942	1400623	1240928	1302725	660629	1404387	1026394	1384617
3498	4-vinylphenol sulfate	Xenobiotics	Benzoate Metabolism	36098	LC/MS Neg	100001755	3320	199.007	2628-17-3	6426766	C05627	HMDB04072	3161935	1820542	1145945	2589265	2225095	1240763	2540928	1731495	1834231	1670018	2.03659e+06	1455614	1.90918e+06	1680257	1752433	1456144	1380420	1436068	2108792	2574231	1692839	1495623	1713513	633765	3200115	1446367	2027207	1240818	910888	705978	1611553	1761156	2125633	1497552	2990461	1507799	1428217
3330	5,6-dihydrothymine	Nucleotide	Pyrimidine Metabolism, Thymine containing	1418	LC/MS Pos Early	158	1280	129.066	696-04-8	93556	C00906	HMDB00079	625218		2348021			1416052	624705	613031	592607	2605452			624309			1606240			887826		782965	1969108	417789			1608500	423019		259586	516939	396302	671310	725398	584729	589107	856529	868612
3292	5,6-dihydrouracil	Nucleotide	Pyrimidine Metabolism, Uracil containing	1559	LC/MS Neg	1125	1120	113.036	504-07-4	649	C00429	HMDB00076	139039		466120	143809	103681	209690	112151		155027	552455	180202		135954	223490	163519	367950	189467		171012	146157	175545	218834	123038	175341		407610	93422	73173	206995	207517	187162	127026	245931	168921		172928	213914
1412	5-hydroxyhexanoate	Lipid	Fatty Acid, Monohydroxy	31938	LC/MS Neg	100001148	1267	131.071	44843-89-2	170748		HMDB00525	121134	142608	273687	129918	219091	271263		269655		197549	195142	504014	660546	192935		304864	226435	192656	248744	207291	213169	525528	225798	199944	131831	231538		197783		143954	238077	108958	166954		116268	182924	318129
221	5-hydroxyindoleacetate	Amino Acid	Tryptophan Metabolism	437	LC/MS Neg	71	1510.2	190.051	54-16-0	1826	C05635	HMDB00763	123326	167012	265090	171777	180826	141768	94572	152714	88921	124457	137967	144745	223681	219436	198281	186640	157434	181439	178609	179101	218744	150868	208969	152360	156534	177681	185516	229298	155109	162092	180660	181299	183365	109190	200578	107956	192749
91	5-hydroxylysine	Amino Acid	Lysine Metabolism	15685	LC/MS Pos Early	100000054	2790	163.108	13204-98-3	1029	C16741	HMDB00450	1.77826e+06	1069121	1485230	1693903	1536692	872495	1247866	1226758	1516932	1512521	1093240	1480194	1039312	1.7067e+06	1136562	553367	1116301	769788	965885	1148766	1.76402e+06	817421	801776	933191	957067	1490099	1459975	1397930	1105573	1381574	1272877	1193696	1319485	1430329	1501020	1187429	1081268
3321	5-methyl-2'-deoxycytidine	Nucleotide	Pyrimidine Metabolism, Cytidine containing	38159	LC/MS Pos Early	100002300	2303	242.114	838-07-3	440055	C03592	HMDB02224	965065	786879	678766	808621	708525	538462	1059224	502495	694992	469951	702670	560243	929004	865491	796275	676139	715980	880668	974556	796090	706274	666733	462339	513920	808462	1266101	643502	634303	687789	622685	958743	1.04664e+06	1074501	850146	807792	981835	876802
3312	5-methylcytidine	Nucleotide	Pyrimidine Metabolism, Cytidine containing	22119	LC/MS Pos Early	100000763	2227	258.108	2140-61-6	92918		HMDB00982	764106	511856	796407	832556	1.00442e+06	570178	534664	592360	655159	633058	711270	825036	561211	709734	684593	848462	985192	899391	636936	782329	798165	770984	503217	677813	753326	638404	787473	828120	1132176	1105115	650065	778264	780795	1089359	665566	724252	943478
390	5-methylthioadenosine (MTA)	Amino Acid	Polyamine Metabolism	1419	LC/MS Pos Early	212	2752	298.097	2457-80-9	439176	C00170	HMDB01173	807738	685935	909245	970904	978224	806284	841562	919716	739255	735260	947783	860134	1071071	1512710	1053225	1003409	935298	867285	1346341	1008766	1091183	1008750	1108088	871278	815462	1948900	1113462	1031539	1237874	1283934	1375686	1110925	1.39512e+06	941344	1253595	1.59956e+06	1204639
3285	5-methyluridine (ribothymidine)	Nucleotide	Pyrimidine Metabolism, Uracil containing	35136	LC/MS Neg	100001446	1778.1	257.078	1463-10-1	445408		HMDB00884	85959	125498	173000	201328	190775	113183	63867	123911	86360	100817	105663	148350	152671	208713	144278	113329	144462	198642	127260	140346	201841	116897	131834	105214	94847	59012	131892	108406	65124	78916	157536	137112		100473	69101	43268	77498
409	5-oxoproline	Amino Acid	Glutathione Metabolism	1494	LC/MS Neg	1021	738.5	128.035	98-79-3	7405	C01879	HMDB00267	5910346	5039116	7686787	6899361	6527271	6645262	5419933	6460312	5637890	8877225	6513379	6716069	5919044	6439939	5194436	8335520	5329672	5123913	5537700	6856175	5050154	5376490	6145955	4875989	4674675	7690926	5470541	6462814	6191629	6745030	6039356	5377456	5421166	5801841	6645610	8072360	7922385
4508	6-hydroxyindole sulfate	Xenobiotics	Chemical	48698	LC/MS Neg	100006260	2498	212.002					145827	221505	264560	268065	211323	160297	151977	257386	132690	347973	205456	189346	314529	232485	284159	327828	115356	222856	395281	293282	279247	222499	241567	202564	274918	207115	224306	287229	194877	139737	307336	197679	244998	205516	298506	171933	147008
104	6-oxopiperidine-2-carboxylate	Amino Acid	Lysine Metabolism	43231	LC/MS Neg	100004499	964.5	142.051	34622-39-4	3014237		HMDB61705	115102			106062			124010	81187	106988	116009		102250	151673		94649		250695	114000	167435		163841	182024	115164	144105	100591			88707			79896	163878	107926		117636
2379	7-alpha-hydroxy-3-oxo-4-cholestenoate (7-Hoca)	Lipid	Sterol	36776	LC/MS Neg	100001609	5288.1	429.301	115538-85-7	3081085	C17337	HMDB12458	1238004	442124	1833816	555455	819731	952379	834221	685623	866089	2246555	1124204	695114	664681	524640	803261	914863	631996	707299	639727	1035219	548930	496576	521698	335804	488605	952314	614059	538735	260336	470268	597303	548839	755367	714473	837466	599447	304515
3251	7-methylguanine	Nucleotide	Purine Metabolism, Guanine containing	35114	LC/MS Neg	100001456	1729.7	164.058	578-76-7	11361	C02242	HMDB00897	130780	153238	134146	162835	129207	120694	95264	138331	79961	135088	149716	147872	139845	169270	162693	167799	145066	150976	169782	142714	146713	144881	136899	145959	161414	190851	179344	176070	108899	161191	197215	190546	121685	185649	156239	137564	168014
1444	9,10-DiHOME	Lipid	Fatty Acid, Dihydroxy	38399	LC/MS Neg	179	5180	313.238	263399-34-4	9966640	C14828	HMDB04704	407135	268107	432321	483380	273899	418526	260963	240392	259709	337127	296348	274398	237139	303315	205051	522297	279183	373215	263867	242579	264503	270212	731182	338895	331961	430557	410698	289258	318176	307382	346675	231304	404319	565710	349868	552593	687741
1325	acetylcarnitine (C2)	Lipid	Fatty Acid Metabolism(Acyl Carnitine)	32198	LC/MS Pos Early	100000802	2282	204.123	5080-50-2	1	C02571	HMDB00201	1130298240	1204808192	1639516160	1319082880	1412442368	1667314944	1030745984	1237973632	1350864128	1427335680	1288510336	1342207488	1180194688	1475891840	1412672128	1627964672	1446156544	1377555328	1079726464	1254306048	1683965952	1298786944	1488595712	1252186496	1120787072	1319154176	1399477888	1499153536	1362521600	1519202304	1194547968	1229156736	1398355968	1438694016	1501679360	1310700800	1431850112
3216	adenine	Nucleotide	Purine Metabolism, Adenine containing	554	LC/MS Pos Early	880	2221	136.062	73-24-5	190	C00147	HMDB00034	369031	676133	1039982	365842	616257	1305167	502535	815231	703111	685421	4550084	814607	605626	2834406	966188	1255959	596204	2595122	4932340	1608552	929021	644926	7595595	2503796	328677	734415	716383	912071	634606	790914	1237622	588622	562944	581083	505709	458176	566313
3211	adenosine 3',5'-cyclic monophosphate (cAMP)	Nucleotide	Purine Metabolism, Adenine containing	2831	LC/MS Neg	207	1952.2	328.045	60-92-4	6076	C00575	HMDB00058	309714	256020	583978	522744	519863	357619	235307	448622	335930	379736	497827	482628	570690	918621	448744	298839	337055	428653	496814	420002	533319	400436	291186	382691	473770	348482	288202	375765	513737	424860	524239	355044	681552	418414	471325	419726	536829
3361	adenosine 5'-diphosphoribose (ADP-ribose)	Cofactors and Vitamins	Nicotinate and Nicotinamide Metabolism	558	LC/MS Neg	215	920	558.064	68414-18-6	192	C00301	HMDB01178	105684	227196	163909	415479	372519	201308	137588	425922	264736	374677	365275	277784	583848	837953	260825	334857	219665	317923	590368	378014	454130	315605	325000	291088	508236	581984	347422	256168	595779	274544	581454	335264	544159	433265	431776	226110	425323
1348	adipoylcarnitine (C6-DC)	Lipid	Fatty Acid Metabolism(Acyl Carnitine)	52988	LC/MS Pos Early	100006614	2558	290.16		71296139		HMDB61677	766293	809311	1418575	1032047	1225424	1133487	651788	828139	770545	692148	964717	1196316	695861	1208391	906476	693491	1196630	927990	612889	739849	1543988	709895	1148555	1146783	584790	652009	1.00479e+06	1291525	1650066	1697810	827212	777793	760272	1306519	706392	1247994	2013927
1158	adrenate (22:4n6)	Lipid	Polyunsaturated Fatty Acid (n3 and n6)	32980	LC/MS Neg	100001193	5678	331.264	2091-25-0	5497181	C16527	HMDB02226		9317678	3.75408e+06	12350811	9275038	29720392		14887596	20402444				7.79444e+06			4086256	11930524					6063457	14038682	5110412		6522195			11645006	14345285	8.33981e+06	7399618	18309952	19526456	8694638	20367760	33788424
1355	adrenoylcarnitine (C22:4)*	Lipid	Fatty Acid Metabolism(Acyl Carnitine)	57528	LC/MS Pos Late	100015850	1415	476.373					81826		140802	79279		71417			68350			70605		88159							92223	57334				138783		78352			46832	83461		138422		65402	123909
28	alanine	Amino Acid	Alanine and Aspartate Metabolism	1126	LC/MS Pos Early	811	1700	90.055	56-41-7	5950	C00041	HMDB00161	576892992	505718624	583258048	535740288	541212672	574787840	536234400	456811520	517315072	629656448	548545472	543596928	552918400	536314400	522720928	564308224	470751328	465740768	486756416	524278496	603180288	560754880	472968384	429360064	485252064	615343360	491784192	495321760	510777344	489490432	457971168	501483968	628848128	460860256	537345280	504149440	440977824
3203	allantoin	Nucleotide	Purine Metabolism, (Hypo)Xanthine/Inosine containing	1107	LC/MS Polar	1002	1672	157.037	97-59-6	204	C02350	HMDB00462	67432408	51130732	51499032	53308872	52506508	47402932	47045376	53534784	62149924	44364748	44760808	48787004	67317464	51958640	59405736	37797132	74379024	63071968	54442408	52889256	67865216	58728116	44790560	51003464	49429400	43195952	57436720	56766888	41923264	52706608	63178504	62829688	67224848	62723848	55404152	59053444	72222176
247	alpha-hydroxyisocaproate	Amino Acid	Leucine, Isoleucine and Valine Metabolism	22132	LC/MS Neg	100000706	1840	131.071	10303-64-7	83697	C03264	HMDB00746	668530	856927	421493	594527	612714	656368	915474	394023	607054	803546	854054	690994	1179925	727507	616439	826214	605039	433246	737164	556885	581190	529038	1374097	336458	732609	396056	451420	614400	359615	363083	766799	580575	311100	521459	646158	736043	515623
279	alpha-hydroxyisovalerate	Amino Acid	Leucine, Isoleucine and Valine Metabolism	33937	LC/MS Neg	100001300	1126	117.056	600-37-3	99823		HMDB00407	1196649	955862	1152155	1.01742e+06	1147985	1190020	1.50206e+06	1008552	1825558	955065	1355429	1173952	1849983	1178148	1325471	1265435	1.85071e+06	1291789	919407	1036427	1684925	1208167	1829486	1233330	1524521	680681	871783	1013270	936948	1000074	1181557	1644885	909142	1474731	718022	1335092	1864101
1059	alpha-ketoglutarate	Energy	TCA Cycle	528	LC/MS Polar	93	2700	145.014	305-72-6;328-50-7;22202-68-2	51	C00026	HMDB00208	18135040	30025212	62216880	21235972	25998968	29161912	31474404	25384900	25170012	29094282	27039736	21579896	32912252	30511660	24535474	31836202	25695476	20371386	29921580	28527150	43945352	21447720	51426084	30333328	17884386	32141120	31958904	19362756	10447102	10371909	25541144	26475504	11050542	15096318	13085636	9604663	11302481
2562	alpha-muricholate	Lipid	Primary Bile Acid Metabolism	34092	LC/MS Neg	100001280	4765	407.28	2393-58-0	3083761	C17647	HMDB00506	2.38736e+06		11532882	718097		1522477	227985	185798		4046649		360169	266690			5654036	92591	172229	82628	264836	80623				148059	6017378							101656	1154933		42891	388470
3383	alpha-tocopherol	Cofactors and Vitamins	Tocopherol Metabolism	1561	LC/MS Pos Late	1105	2522	430.378	59-02-9;10191-41-0	14985	C02477	HMDB01893	59215652	7473883	55231224	10763633	56129252	18820648	52637620	2518041	27102144	4635537	31501950	9431777	16366462	5436502	9858597	1947159	30969372	56261724	1437697	4795392	22680686	11872429	4649651	1278051	4310710	2262038	8482684	18494962	3795312	1864579	1839570	2268125	4780858	8600659	2961288	3.07297e+06	6.62372e+06
3208	adenosine 5'-monophosphate (AMP)	Nucleotide	Purine Metabolism, Adenine containing	32342	LC/MS Pos Early	209	1013	348.07	149022-20-8	6083	C00020	HMDB00045	1043238	1426161	940726	1564390	2031782	2036668	1374307	2086152	1450485	1266908	1761060	1568991	4151220	3544694	1094038	2546199	1750118	2227579	2710037	2659717	2782319	2391187	2958077	2235601	1329447	7379562	2500082	1481907	4.58157e+06	3005651	3555405	2482064	2158431	1806012	1176271	1957312	4568523
441	anserine	Peptide	Dipeptide Derivative	15747	LC/MS Neg	100000044	1124.8	239.115	10030-52-1	112072	C01262	HMDB00194	165741	326761	778056	449858	529184	398174	311003	427163	230484	307619	548566	434189	896108	1220996	662154	334386	339497	398009	461577	524844	401547	559927	358677	435903	321410	444979	409593	737513	482539	575237	487328	306471	533846	322079	731472	449518	567098
922	arabitol/xylitol	Carbohydrate	Pentose Metabolism	48885	LC/MS Polar	100006430	1932.4	151.061		6912	C01904		845473	638407	821037	627232	664715	691894	904084	646860	768439	729384	687179	691036	795711	927481	872435	613991	549866	606896	880166	709549	737389	634906	716235	564946	643028	724073	597511	592609	518786	518406	910087	760343	1002201	782217	752717	665380	583588
924	arabonate/xylonate	Carbohydrate	Pentose Metabolism	48255	LC/MS Polar	100006115	2664.6	165.04					2160866	622824	751065	1054464	2129053		1521567	1777876	1327040	327930	784522	1163792	2379741	2616409	1141982	406214	1448478	399822	1667922	2411446	1993543	1681389	686130	1025461	1.41272e+06	312500	970590	1.65751e+06	595007	895213	3171618	1620094	781941	1382716	1022165	1204407	1079196
1126	arachidate (20:0)	Lipid	Long Chain Fatty Acid	1118	LC/MS Neg	893	6295	311.296	506-30-9	10467	C06425	HMDB02212	6040670	5615546	4082587	7645148	6.42139e+06	7231744	6.87922e+06	6691615	7874518	6.57609e+06	8061610	5208884	7201456	4666736	7.96474e+06	8801409	7326280	5989294	7.71332e+06	5570051	5168527	3945055	6.72987e+06	5109350	9295729	6.48973e+06	6347933	4671710	5564320	6.00102e+06	7151108	4253418	6661144	8035987	5806674	8574380	7067128
1157	arachidonate (20:4n6)	Lipid	Polyunsaturated Fatty Acid (n3 and n6)	1110	LC/MS Neg	229	5535	303.233	506-32-1	444899	C00219	HMDB01043	127510624	110508896	65576140	158770704	120118392	85158368	107049592	97980176	144588464	67294568	81318112	116336272	130193888	126424688	81095368	72203512	116283112	98504000	78356712	97354096	101212848	76601664	81023384	79692584	138983024	75351768	96649400	85844752	105141264	102474136	94076208	74801824	135657088	197327008	121394584	166251664	147415824
1354	arachidonoylcarnitine (C20:4)	Lipid	Fatty Acid Metabolism(Acyl Carnitine)	57518	LC/MS Pos Late	100015837	1353	448.342					4567784	2587547	5378692	3.88048e+06	2804544	3686436	1965545	2486010	2992550	1663063	2121417	3536677	2573267	3.84286e+06	2890323	3162633	5219594	3223589	1933738	2291849	4199112	3005566	2336596	2174384	2946207	3.59008e+06	3441398	3398109	3272494	4842714	3242696	3752635	3619456	4634250	2619466	3.81543e+06	4117832
1353	arachidoylcarnitine (C20)*	Lipid	Fatty Acid Metabolism(Acyl Carnitine)	57513	LC/MS Pos Late	100015833	1512	456.405				HMDB06460	239186	189505	266132	367112	331262	172443	184032	151282	198482	131236	335569	264545	288474	295218	240906	154016	299393	186919	165725	189461	255620	213712	135592	187539	257043	325067	273275	305738	355158	311608	239996	261451	318235	391979	258100	352513	270036
372	argininate*	Amino Acid	Urea cycle; Arginine and Proline Metabolism	57461	LC/MS Pos Early	100002769	2150	176.103	157-07-3	160437		HMDB03148	1359455	1168586	671870	910312	1847421	1076420	1598335	1063619	1355164	1649091	2244143	1583962	1248639	1832049	1567470	965737	1088348	919423	1049669	1733272	1083706	1156673	924892	970720	891245	678654	1319056	1022060	574121	1448342	960859	1022393	1535552	1360996	1505194	1490035	856657
342	arginine	Amino Acid	Urea cycle; Arginine and Proline Metabolism	1638	LC/MS Pos Early	231	2825	175.119	1119-34-2	232	C00062	HMDB00517	1171200512	972897664	709921856	1009018048	938088192	617783552	875784832	682915136	884461888	700904960	726837376	954368000	1104773120	974190464	847640576	771814336	822795584	917793472	1057833984	817216128	1129151872	1052816256	890638336	696297600	972516480	625123392	892334336	768712256	622834176	629160832	878019136	989558144	691994048	757227520	884210432	521260992	501575968
343	argininosuccinate	Amino Acid	Urea cycle; Arginine and Proline Metabolism	15497	LC/MS Pos Early	232	2745	291.13	156637-58-0	828	C03406	HMDB00052	240648	166726	142964	199047	117538		166228	148651	150664	74023	106563	183541	304839	442558	110882		160620		148880	128332	205483	82062	121648	80249	95676	67744	119545	68267	58085	88386	156840	146451		158508	92312	86572	109403
38	asparagine	Amino Acid	Alanine and Aspartate Metabolism	512	LC/MS Pos Early	917	1225	133.061	70-47-3	6267	C00152	HMDB00168	30754420	23844360	57874296	28319604	27367332	42174372	22439940	21782926	27520484	67451304	19920412	23042854	27152722	26938404	23843840	53211628	19749018	20512196	20124788	23049600	30487456	25656898	22787802	19210084	23147424	52512616	20426508	24162888	24242974	24269268	23006968	24474052	32652020	26342276	27519146	27837376	25718804
34	aspartate	Amino Acid	Alanine and Aspartate Metabolism	443	LC/MS Pos Early	234	1165	134.045	56-84-8	5960	C00049	HMDB00191	8.16703e+06	10869125	12172008	8696324	12054515	9080972	9932877	7983022	18056026	18761920	11719859	9741883	7178543	16325873	9198881	12793771	9592571	8504390	8.37163e+06	6.61812e+06	13766399	9354603	12703897	6868434	9198118	18717600	11137359	12293496	14350985	11775982	8276258	8872364	10088746	13691747	13170136	10403491	12212243
1247	azelate (nonanedioate)	Lipid	Fatty Acid, Dicarboxylate	18362	LC/MS Neg	2029	1276	187.098	123-99-9	2266	C08261	HMDB00784	1234151	497364	596393	780044	580862	436107	798132	689802	231898	683444	505214	790101		598827		632179	450542	443477	611883	448496		466833	731760	406107	460534	472249	938502	684042		549785		410448		694229	532679	403024	743185
1133	behenate (22:0)*	Lipid	Long Chain Fatty Acid	12125	LC/MS Neg	314	6745	339.327	112-85-6	8215	C08281	HMDB00944	1139016	1310414	996035	1.54405e+06	1207578	841332	1764335	1.58427e+06	1329145	1497727	1435992	1365730	1045085	1071544	1812231	1560406	832289	1068554	1.43008e+06	1.4775e+06	1590763	1041412	1357975	983842	1946584	1083918	2108517	1.72903e+06	1057748	1262645	1301017	949876	2.00636e+06	1933725	2482039	1985035	1001374
2255	behenoyl dihydrosphingomyelin (d18:0/22:0)*	Lipid	Sphingolipid Metabolism	57331	LC/MS Pos Late	100009026	3150	789.684				HMDB12091	480589	359969	237833	540635	431768	436514	479798	432244	625502	255623	561842	638877	586608	491779	480054	311281	449174	607717	575799	443136	531268	790579	466630	376901	541488	420952	509854	463051	481798	643122	456777	500933	714209	550575	428105	901212	821607
2258	behenoyl sphingomyelin (d18:1/22:0)*	Lipid	Sphingolipid Metabolism	48492	LC/MS Pos Late	100006294	3083	787.669				HMDB12103	28320216	26096150	18655084	35200340	34290432	24465916	31327536	28945936	33794932	17070696	41638224	34659736	39394068	32017156	30034814	21438824	33496294	40386692	30770862	31856670	31817628	41382736	34505144	31257536	32330280	19215234	28480156	26555912	33638472	36857944	33209090	34948792	36052588	34144456	25830356	51230048	42429640
1356	behenoylcarnitine (C22)*	Lipid	Fatty Acid Metabolism(Acyl Carnitine)	57514	LC/MS Pos Late	100015832	1561	484.436					203858	144640	142059	212123	206804		109518	116168		92035	159006	221985		206804	137243	110774	152386			121217	133668	127299			180675		203786	165070	308929		122856		216145		129074	259237	181115
3464	benzoate	Xenobiotics	Benzoate Metabolism	15778	LC/MS Neg	100000008	1750	121.029	65-85-0	243	C00180	HMDB01870	2975098		781242	1041494	1444383	1309547	1072192	995828	1714913	1572719	1204510	1116727	1.77743e+06	1395663	986819	1222289	1242229	1794793	1083653	1138488	1950898	1672090	1.92118e+06	1643641	2156582	1849956	1447787	1138458	1935883	1437158	1455869	1.83392e+06	1275979	1084272	1.04289e+06	1.61831e+06	1630676
259	beta-hydroxyisovalerate	Amino Acid	Leucine, Isoleucine and Valine Metabolism	12129	LC/MS Polar	1442	1149.8	117.056	625-08-1	69362		HMDB00754	1468170	1235930	1470668	1395136	1325993	1.04328e+06	1.5296e+06	1314232	1297905	1120690	1191984	1253573	1.60043e+06	1331997	1145076	1242385	1576737	1450241	1.51374e+06	1589447	1488536	1215890	1396739	1034755	1647702	1013351	1837399	1.40184e+06	1037659	1182578	1528461	1771027	1251671	1102079	1486576	1273086	1456395
6	betaine	Amino Acid	Glycine, Serine and Threonine Metabolism	3141	LC/MS Pos Early	799	1064	118.086	107-43-7	247	C00719	HMDB00043	1065996288	875004352	1841098368	1025497344	1283939456	1572825344	1054228736	905778944	1125989120	1832960000	1188798592	1074486784	806091072	1043121344	1164761344	1576104832	1094731776	820979968	1004026624	968421440	1087612544	849299200	1087182720	715773056	848891584	1887489664	1083935616	1166268032	1040176896	888831680	946440640	1128445312	1049845440	943941824	1380838912	878869952	652259968
2561	beta-muricholate	Lipid	Primary Bile Acid Metabolism	31885	LC/MS Neg	100001066	4794	407.28	2393-59-1	5283853	C17726	HMDB00415	9486122	5823814	67485872	15584756	7862793	19284278	3096775	3398717	467077	35319840	999556	6125557	6466214	1134142	1781231	26822548	3128769	2890960	2552858	8543861	2186447	4594857	738198	2009581	4553969	54103776	9004666	15708975	4339711	21576400	5091236	3389441	5549240	25092716	41386508	2344947	12654351
2392	beta-sitosterol	Lipid	Sterol	27414	LC/MS Pos Late	100001033	3054	397.383	83-46-5	222284	C01753	HMDB00852	1192061	797873	870481	1297645	767010	921585	937930	668895	840709	662393	1116334	918788	984942	896438	795360	442190	561902	733408	740901	731936	654771	1042845	790776	606080	1164561	1135010	691587	762597	1090463	996075	742023	781756	749468	1135539	948314	609329	627614
3420	bilirubin (Z,Z)	Cofactors and Vitamins	Hemoglobin and Porphyrin Metabolism	43807	LC/MS Neg	1090	4796	583.256	635-65-4	5280352	C00486	HMDB00054	84175	59318	129101		121567	83997	83146	39170	63182		85458	22175	183465	62496	61938		74498	109501			107175	36878	32628		52951		24799						86666	62661
3421	bilirubin (E,E)*	Cofactors and Vitamins	Hemoglobin and Porphyrin Metabolism	32586	LC/MS Neg	100001950	4294	583.256	114-25-0	5315454				36644	160237		43059	67636				57033			41227		21056			43693								29635								31469
3423	biliverdin	Cofactors and Vitamins	Hemoglobin and Porphyrin Metabolism	2137	LC/MS Neg	250	4695.6	581.241	55482-27-4;55482-27-4	5353439	C00500	HMDB01008	49221	141502	218594	134396	126353	166600	62591	158903	73204	120344	152410	107586	196904	154726	168961	174587	87058	157646	168050	163672	144801	101862	152862	118368	141553	276162	96728	117513	137814	117215	224289	137993	160185	186854	134718	148734	136184
1304	butyrylcarnitine (C4)	Lipid	Fatty Acid Metabolism (also BCAA Metabolism)	32412	LC/MS Pos Early	100001054	2860	232.154	25576-40-3	439829	C02862	HMDB02013	19548770	31405964	42857176	23304588	31403224	38862384	47732620	22979762	21340640	71467776	33911952	20850734	21507208	29643760	26896820	48523200	23823600	25110454	34981872	61297548	33704052	22571168	32621178	21196768	25428940	51977724	53383424	29590972	28724626	26010532	21237450	24963082	38805444	31689654	39199852	18509816	24851416
1305	butyrylglycine	Lipid	Fatty Acid Metabolism (also BCAA Metabolism)	31850	LC/MS Neg	100001151	1470	144.067	20208-73-5	88412		HMDB00808	1269208	1564801	1023557	1307291	1991189	1001224	1659590	2147760	2268590	1.00761e+06	2614500	1.71948e+06	2204862	4324403	1743899	824186	2.00063e+06	1887304	1631574	2498878	3190488	1.71089e+06	2158745	3861123	1098184	813453	2661192	1748671	2134361	1616488	1014165	1.7599e+06	2.04738e+06	1.95769e+06	1276449	1273581	2793386
3553	caffeic acid sulfate	Xenobiotics	Xanthine Metabolism	53254	LC/MS Polar	100009337	1307	258.992				HMDB41708	7689239	8441272	4234125	10685239	4889846	5757769	10234709	7987787	7527589	7710982	5157956	4302677	8516823	5135136	5854275	8357718	2073408	1.93293e+06	9362516	6448548	5908595	3920109	5.1414e+06	1926841	5709971	4378166	6.49425e+06	4607457	2166393	1426612	4255445	4713880	9776692	2.82034e+06	14605982	8290138	2194067
2394	campesterol	Lipid	Sterol	33997	LC/MS Pos Late	100001269	2873	383.367	474-62-4	173183	C01789	HMDB02869	4215896	3264777	3182024	3.84607e+06	3276083	3.48059e+06	3858397	2676286	2825209	2420449	3988871	3.4469e+06	3941098	3428055	3032348	2237161	2654155	2476437	3041994	2.99783e+06	2515136	4580922	3305717	2641490	4728337	4310912	3207477	3309077	3.74969e+06	3876439	2646871	2947083	3402550	3304498	3540924	3.73552e+06	2360499
1093	caproate (6:0)	Lipid	Medium Chain Fatty Acid	32489	LC/MS Neg	926	2713.7	115.076	142-62-1	8892	C01585	HMDB00535	631373	731009	640289	506133	542076	947579	595276	236920	655543	349362	818468	721170	652968	412102	399959	1064156	816790	807537	732694	757983	568086	506229	1029472	661318	568958	853874	585067	735825	596318	989020	519440	785434	319678	758284	308924	730598	1220869
53	carboxyethyl-GABA	Amino Acid	Glutamate Metabolism	40007	LC/MS Pos Early	100003260	2085	176.092	4386-03-02	2572		HMDB02201	199986	329584	312443	301087	292975	308847	234613	366762	322665	184419	433908	217092	395592	363984	314198	320931	325908	272805	171519	363360	313706	278098	423858	212239	198927	213201	310169	273134			335277	224682	150334	243576	110500	174015	341027
1375	carnitine	Lipid	Carnitine Metabolism	15500	LC/MS Pos Early	100000007	1978	162.112	461-05-2	10917	C00318	HMDB00062	1027832512	946968256	1017469568	1027408192	1139458816	1065926464	929411840	939883776	955830848	1165040512	994490304	1077064448	920445184	1018682304	973603136	1171820288	953096768	838677056	916728320	1110430464	1002591680	1085298816	1024787328	724123520	935203264	990387200	1088008960	1098486784	996822208	979287936	986639936	1050412608	1081132544	1014153280	1265971968	1090166656	791219520
73	carnosine	Amino Acid	Histidine Metabolism	1768	LC/MS Pos Early	249	2942	227.114	305-84-0	439224	C00386	HMDB00033	4743159	1818811	3.88552e+06	3602298	3884288	2325979	3354097	2681028	1558596	2.07897e+06	3.32572e+06	2992662	1953291	4438878	3908373	1.63562e+06	2909978	2597417	3.16476e+06	2963354	3759589	2578683	1194904	2208978	2400754	4089019	2566347	3803829	2924956	3257301	3856634	2899429	3205029	3.70089e+06	3768490	3.33607e+06	3215131
3980	carotene diol (1)	Xenobiotics	Food Component/Plant	57635	LC/MS Pos Late	100015966	1720	568.428					258741	425940	462109	384255	527903	361297	562497	356214	299304	201296	478257	375921	341991	240799	413943	226671	358178	375646	102763	448837	288388	359955	220080	240004	238153	251448	380804	473192	189661	176051	190372	196466	168745	470434	134122	241231	293000
3981	carotene diol (2)	Xenobiotics	Food Component/Plant	57636	LC/MS Pos Late	100015967	1904	568.428					218706	272104	261902	124971	415654	182416	311414	72033	202642		323917			126502	234668	100662	279634	343379		217317	351086	300138	156994	71826	167161	104585	275121	276480		83157	123178	105795	99955	222992	86351		151830
3482	catechol sulfate	Xenobiotics	Benzoate Metabolism	35320	LC/MS Neg	100001605	1906	188.986	4918-96-1	3083879		HMDB59724	19288264	20249090	19127116	17291498	28702688	18502612	20943108	27570148	31497684	30423754	26090522	21161444	32551336	28377812	23603112	15471365	17189772	10307820	19669476	24601300	25422212	14879672	20122410	9862778	25145484	15894548	28163136	17990996	14869534	9667047	16723287	12996876	25794396	24611988	25656672	19630806	22415224
2639	ceramide (d18:1/20:0, d16:1/22:0, d20:1/18:0)*	Lipid	Ceramides	57440	LC/MS Pos Late	100015755	3920	594.582					115547	104842	201377	187475	151910	78810	133558				188230	106008	119887	226821						110004	215875	328718	106835	232132	189251		208214	320879	363850	484237			291174	362135	290294	545143	255747
1369	cerotoylcarnitine (C26)*	Lipid	Fatty Acid Metabolism(Acyl Carnitine)	57516	LC/MS Pos Late	100015835	1649	540.499				HMDB06347
201	C-glycosyltryptophan	Amino Acid	Tryptophan Metabolism	48782	LC/MS Pos Early	100006379	2700	367.15	180509-18-6	10981970			356443	229596	343903	348586	336703	239658	278150	342371	276925	204942	318056	329014	371595	314850	408720	239759	317944	280629	339170	387555	406442	375253	222188	271678	226841	391792	311014	324447	320603	359422	343504	343275	312182	325368	304393	421121	338464
2558	chenodeoxycholate	Lipid	Primary Bile Acid Metabolism	1563	LC/MS Neg	1123	5264	391.285	474-24-9;474-25-9	10133	C02528	HMDB00518	577715	132423	4385446	280048	265770	567729	119799	67471		4093750		146277	154244		38526	3.78027e+06	170969			181016					90790	3365821	203134	301647	212988	611812	186397	72444.5	59314.2	720511	806932	89923.9	304156
2555	cholate	Lipid	Primary Bile Acid Metabolism	22842	LC/MS Neg	136	5165	407.28	81-25-4	221493	C00695	HMDB00619	11407428	3673382	117947320	6317963	4145616	26957710	1897355	2556579	224410	59570388		3013077	2464435	183070	258602	52266656	1.49361e+06	1070662	1059939	4411015	541356	2109703	188245	677562	1358154	95714000	5478225	5284983	3004001	12913409	2352161	2070442	81563	13728132	15203150	1223390	7862315
2369	cholesterol	Lipid	Sterol	63	LC/MS Pos Late	266	2707	369.352	57-88-5	11025495	C00187	HMDB00067	185936208	150774144	120263792	194306416	151698976	127486224	186421888	115934480	132065496	109869016	180900144	155841456	199806176	143028464	132242280	123420864	123437160	151248944	136089264	146162608	148698464	192883520	136442704	125050376	186988992	131246936	146810800	147041792	192950480	172930640	129483656	148301264	189201520	195265280	165832480	213585888	157736208
1590	choline	Lipid	Phospholipid Metabolism	15506	LC/MS Pos Early	1256	1961	104.107	67-48-1	305	C00114	HMDB00097	358387584	267125920	467409696	367132960	447855040	456308448	301836896	346621376	410889152	383598016	475276448	450073760	343592192	408246624	384959104	427041920	419388832	468336448	384981312	354726368	390878720	416153696	391011712	361761184	327104000	427978976	327786400	345891008	511850752	386450336	341039520	335011584	329473312	335696128	331999584	330174048	389257888
3723	cinnamate	Xenobiotics	Food Component/Plant	12115	LC/MS Neg	1259	2878	147.045	140-10-3	444539	C00423	HMDB00930	68127	94667	57201	33816	136477				60191	97989	24535		152811	35987	78790	264071	128209	126103		96556	221080		186248	43935	73022	108661		146993		116683	123972	70029		88763	46968		109385
3724	cinnamoylglycine	Xenobiotics	Food Component/Plant	38637	LC/MS Neg	100002253	3127	204.067	16534-24-0	709625		HMDB11621	1.86692e+06	3.897e+06	617949	2.99985e+06	3297687	623722	1357872	1968667	1164603	1817881	1632568	1.04598e+06	7967011	1909777	2344116	5898403	5.79059e+06	5412648	138632	5293583	7933213	742431	7.25983e+06	1628520	6918887	2724286	808897	7.66964e+06	1363508	4283949	8219794	3819509	3180997	3.49729e+06	3519242	526172	4197788
1334	cis-4-decenoylcarnitine (C10:1)	Lipid	Fatty Acid Metabolism(Acyl Carnitine)	38178	LC/MS Pos Late	100002259	1057	314.233	98930-66-6				3223474	2111079	4229126	2994713	2792562	3.28918e+06	1611626	1674175	3471559	2109560	1731286	2137442	1.95698e+06	2563622	2193167	2841844	3259196	2599108	1557196	1643427	4029530	2.0098e+06	2655764	1.76091e+06	3134949	4135016	2810015	2497282	2492056	2861648	2430524	2840471	2855348	4241427	2334120	2883093	4563786
1053	citrate	Energy	TCA Cycle	1564	LC/MS Neg	1124	582	191.02	77-92-9	311	C00158	HMDB00094	123097224	143946752	144857312	112700976	113313496	109732368	129806920	121169424	107019288	103157152	128198168	104072464	152440688	155030304	131294056	108595648	113168088	119488472	148769088	117115024	194850816	142743920	175143248	143086176	133023560	149695280	149165136	158734384	97374224	136366688	158724288	148763584	124706344	124644432	128911704	104073120	141081664
350	citrulline	Amino Acid	Urea cycle; Arginine and Proline Metabolism	2132	LC/MS Pos Early	391	1520	176.103	372-75-8	9750	C00327	HMDB00904	419311264	291929600	308435520	311739104	325265024	262879056	288792288	269862336	295986496	310705120	252206544	296706528	404252448	292675872	281174144	305679616	289581152	280957280	356172032	298115424	434804608	346707808	282893280	213177584	356562752	330562656	314922944	328636448	216982224	275689408	365698528	353243200	318546944	354613120	399202624	272543712	262614032
2455	corticosterone	Lipid	Steroid	5983	LC/MS Neg	272	5040	345.207	50-22-6	5753	C02140	HMDB01547	5378004	4595551	2702902	3258940	1787530	2134674	4.03412e+06	3.87277e+06	5214817	2713565	4337305	2955644	6.56061e+06	4926539	5107454	2696070	4988111	3924439	4449238	2670944	6745016	2872432	4788328	3652817	4170740	2656352	4593019	4788090	3.51216e+06	2725217	4577362	3369230	4353063	2824480	1740535	2279119	3023332
374	creatine	Amino Acid	Creatine Metabolism	27718	LC/MS Pos Early	1221	1947	132.077	57-00-1	586	C00300	HMDB00064	198407248	188436000	203319408	185645152	210940080	153430528	226518032	165567712	138588640	180228176	150890528	183636800	230336704	541639424	149378384	123839248	145850688	159191088	152909248	209506256	205579344	159821840	142182128	160232720	121024824	174370336	169850560	140474512	160094128	158171088	150256832	151234112	158108224	206786976	159024672	170147856	202604832
375	creatinine	Amino Acid	Creatine Metabolism	513	LC/MS Pos Early	275	2055	114.066	60-27-5	588	C00791	HMDB00562	152970000	134837072	167605888	156192560	155717632	148095536	151486480	150074400	144650432	120012880	138572128	167033952	171387360	181754480	146896768	141011904	159511136	142164832	157190928	155645904	181358880	160560160	154867552	156295024	139089136	151059168	152496656	157292768	150147536	161812336	155086160	160067952	147384752	146503488	143176928	152505984	180013808
323	cysteine	Amino Acid	Methionine, Cysteine, SAM and Taurine Metabolism	1868	LC/MS Pos Early	800	1488	122.027	52-90-4;56-89-3	5862	C00097	HMDB00574	1514425	1092228	1536972	1.61343e+06	997980	1143891	1187993	1141415	977288	1117837	1205512	1554268	1048673	1.27406e+06	1378394	1495665	1001396	924304	1384726	1408492	1097294	1153106	1097657	890893	753520	865708	1181673	1674736	887980	1112563	1298298	1148322	862607	1017871	909482	1263328	717532
328	cysteine s-sulfate	Amino Acid	Methionine, Cysteine, SAM and Taurine Metabolism	22176	LC/MS Pos Early	100000808	565	201.984	1637-71-4	115015	C05824	HMDB00731	1124899	889859	6005862	1383247	1232200	3042064	914378	1203039	1012382	3286492	865026	992852	1573585	956593	1240720	5229456	765924	1216071	1076259	821048	1649544	1444014	1061022	1339362	1064331	2642995	824869	747736	569810	801181	883769	1204176	852007	768319	576117	852594	761446
404	cysteine-glutathione disulfide	Amino Acid	Glutathione Metabolism	35159	LC/MS Pos Early	100001437	2465	427.095	13081-14-6	4247235		HMDB00656	3.85841e+06	2880660	2169146	4247563	3029458	1984556	3880866	3.87838e+06	3152503	1842074	3.90584e+06	4510321	4006092	4813712	3059557	796260	5750023	2719039	3.66616e+06	3569376	3994962	2834502	3142148	2450593	1.93637e+06	1551820	3530056	2981149	4539472	2632909	3235994	2791605	1764519	3738587	2232691	3156021	2981416
329	cystine	Amino Acid	Methionine, Cysteine, SAM and Taurine Metabolism	56	LC/MS Pos Early	279	2000	241.031	56-89-3	67678	C00491	HMDB00192	3279981	1220953	2124690	4873845	2784052	1338474	1708686	1789037	5084915	1113216	2.08436e+06	3648899	7379753	2270349	1973415	548823	9771696	1599761	2.0906e+06	1601080	1421562	1716019	1285224	910393	1329921	460185	1487617	1939628	7627609	1054707	1930562	1322334	718550	1117288	457581	2226359	1075409
3309	cytidine	Nucleotide	Pyrimidine Metabolism, Cytidine containing	514	LC/MS Pos Early	827	2124	244.093	65-46-3	6175	C00475	HMDB00089	12727517	13680771	24722864	18577010	23622788	23416808	15388430	18461404	17715608	20897490	24349624	20932416	15313026	28263728	13542431	21510384	24650488	22157682	18179986	23423010	19895748	17286146	17512744	18273232	9864292	17288076	13596007	16744213	23919876	24186616	16706394	15042668	15515732	19443156	14889554	17514600	26697626
3310	cytosine	Nucleotide	Pyrimidine Metabolism, Cytidine containing	573	LC/MS Pos Early	881	2060	112.051	71-30-7	597	C00380	HMDB00630	1154266	1110795	398299		388380	383853	656426	741003	657049	1116930	808375	506183	1036919	522793	580904			390450	1222114	663888	378546	553356	1229501	441868	705103	354688	630131	1194345	253542	577674	1.89427e+06	1181984	598765	864251	716895		533869
3741	daidzein	Xenobiotics	Food Component/Plant	32453	LC/MS Neg	100001219	3566	253.051	486-66-8	5281708	C10208	HMDB03312	310975	245864	337088	192693	544967	364871	421050	439219	318135	740427	269333	222611	438448	547658	365054	219203	190387	194903	240027	322259	269299	198513	261866	212852	248702	394949	351889	151412	94996		128424	218783	268808	234640	582303	318945	166204
3927	daidzein sulfate (1)	Xenobiotics	Food Component/Plant	48727	LC/MS Neg	100006362	2843	333.007					137596	118205	218217	65021	244744	181102	171765	240747	179859	492820	141057	75601	224360	252394	259799	295030	55377	108827	124033	174159	215714	101680	163067	113904	103976	341949	214233	70853	26835		79039	117347	200563	209617	338031	131590	71016
3922	daidzein sulfate (2)	Xenobiotics	Food Component/Plant	48728	LC/MS Neg	100006363	3330	333.008					4822497	2730734	5107489	2905547	6.16346e+06	3433812	5688102	5045972	4560622	9009119	2873781	2868379	5805527	6466989	4060569	5253735	1626895	3001838	3691217	4733654	4511122	2252344	2831484	1829903	4357655	5873567	3962160	2224002	1399865	483148	3.1507e+06	2353759	5578461	6275043	10143875	3529532	1785755
1332	decanoylcarnitine (C10)	Lipid	Fatty Acid Metabolism(Acyl Carnitine)	33941	LC/MS Pos Late	100001251	1130	316.248	1492-27-9	10245190		HMDB00651	1144312	1437594	4208194	1167190	1153169	1796082	731625	721488	994780	1398467	1612471	918470	1113429	1.84632e+06	1349339	3004055	1689306	1.90908e+06	1298005	1203362	1834571	1183507	3211675	1.01831e+06	1.72472e+06	2125201	1640539	1672788	1419414	2312582	1477898	1164378	1108098	1905664	1181484	971439	2892424
1374	deoxycarnitine	Lipid	Carnitine Metabolism	36747	LC/MS Pos Early	100001662	2052	146.118	6249-56-5	134	C01181	HMDB01161	117164680	102402328	202328992	108158728	145158352	217378064	125255152	138360688	179633744	228833776	139657440	128251064	110950176	173450976	153308176	236041520	120835744	104816584	113544872	120133504	145353264	118364472	160468960	97769104	92989536	183229168	127999288	124640784	104362016	144219200	100986768	117683416	156676640	125321368	196637968	149681904	131548952
2572	deoxycholate	Lipid	Secondary Bile Acid Metabolism	1114	LC/MS Neg	302	5294	391.285	83-44-3	222528	C04483	HMDB00626	1766307	1.41087e+06	17496610	841787	1549099	7156019	979575	1495240	817848	17848940	524258	792350	1045415	287783	905648	23337042	1442113	1849428	990873	2408510	1241611	1464676	430589	523613	1449398	13788020	1.92099e+06	2183306	1.70269e+06	3139041	1.38729e+06	1.35658e+06	1.71455e+06	3542101	2490981	600122	2062825
2164	diacylglycerol (16:1/18:2 [2], 16:0/18:3 [1])*	Lipid	Diacylglycerol	54966	LC/MS Pos Late	100010940	2733	608.525					403267	396172	255935	225714	404604	397944	857159	547355		138026	471148	309959	1095974	468403	187096	128257		284423	86825	830399		361321	170797	404534	281885		171283	71980	344815	431516			499508	716127	409904	280299	339915
1161	dihomo-linoleate (20:2n6)	Lipid	Polyunsaturated Fatty Acid (n3 and n6)	17805	LC/MS Neg	1231	5730	307.264	2091-39-6	6439848	C16525	HMDB05060	11569413	9814613	7947783	14415677	9495556	11349219	11137230	9403245	11506838	8274214	9442481	8786168	12382225	10602149	6759945	8403444	9000524	8505207	7103429	10063570	7258713	6378990	8434888	6829930	14131837	7934284	8608001	8.1011e+06	9616914	9111667	8881799	7094490	13055301	19447016	13049820	13758473	13162277
1156	dihomo-linolenate (20:3n3 or n6)	Lipid	Polyunsaturated Fatty Acid (n3 and n6)	35718	LC/MS Neg	100001739	5596	305.249	17046-59-2	5280581	C03242	HMDB02925	19978780	17912516	8408013	21478798	18876420	14008958	17358630	14862141	21003084	9481453	13071511	14084028	21646228	16171638	11766224	10785378	16176955	16642738	12737333	14252349	13708308	11961538	13101199	12174172	25564398	10103109	12720872	12095640	18612700	17724736	13204470	10979165	23606008	38202144	22442472	23244308	21758056
1357	dihomo-linolenoylcarnitine (20:3n3 or 6)*	Lipid	Fatty Acid Metabolism(Acyl Carnitine)	57521	LC/MS Pos Late	100015840	1392	450.358					815642	555794	963478	666600	528955	785519	274098	416779	531817	434011	388135	587504	468018	563604	458194	544900	739942	571488	331754	356320	626774	656007	405221	465559	524719	780765	602926	589064	790452	910832	513671	611088	538792	800070	418702	642986	792495
1358	dihomo-linoleoylcarnitine (C20:2)*	Lipid	Fatty Acid Metabolism(Acyl Carnitine)	57520	LC/MS Pos Late	100015839	1436	452.373					917854	503723	1067185	921146	706211	805038	461332	505783	702519	593634	647024	839288	672994	858988	564260	654899	853972	623877	375303	436667	879333	733065	685331	561513	657221	972467	793798	680880	1086260	1.0132e+06	562108	801134	721169	1054619	598921	913936	988184
3405	dihydrobiopterin	Cofactors and Vitamins	Tetrahydrobiopterin Metabolism	35129	LC/MS Neg	100001506	1552.3	194.068	6779-87-9	1879	C00268	HMDB00038	77187	79318	97873	82427	124716	101474	73860	102825	80286	89472	118122	103536	195451	130009	120350	46683	119077	116791	114170	107922	157327	83257	72132	56956	107796	77497	108805	83983	151098	71449	83244	87204	137399	129032	102027	86749	122469
3268	dihydroorotate	Nucleotide	Pyrimidine Metabolism, Orotate containing	601	LC/MS Polar	923	1910	157.025	155-54-4	648	C00337	HMDB03349	94528	87726	107088	72212	36297	64197	144782	47097	31530	86922		56458	219402		54348	99950	55290		177963	121148	68374	47790	32416	42009	101740	101008	96203	102138	121313	152124	174524	61608	171162	145857	178032	97239	84878
4439	dimethyl sulfone	Xenobiotics	Chemical	43424	LC/MS Pos Early	100004284	832	95.0161	67-71-0	6213	C11142	HMDB04983	994593	311039	967801	697426	1116122		716959	722590	1251845	839949	457664	816977	725204	517147	762631	562967	897809	602993		1.03223e+06	612355	807719	356580	275633	915757	355482	1422473		327225	726346	643607	891839	325359	665602	719680	698290	645775
356	dimethylarginine (SDMA + ADMA)	Amino Acid	Urea cycle; Arginine and Proline Metabolism	36808	LC/MS Pos Early	100001810	2850	203.15	102783-24-4	123831	C03626	HMDB01539	5320342	5127816	4996842	4899363	5485592	4726172	3862588	3.75315e+06	4277710	4091957	4434080	4488841	7116495	5288038	4864238	4313141	4870748	6001974	5601863	3899108	6706751	5854102	4471279	4379055	5955820	5108578	5070220	5227550	4491604	5203751	4728628	6285080	6100607	4799723	5374467	4112932	5795753
5	dimethylglycine	Amino Acid	Glycine, Serine and Threonine Metabolism	5086	LC/MS Pos Early	806	1104	104.071	1118-68-9	673	C01026	HMDB00092	35755668	26631840	31505964	33490484	34635936	24114554	39430152	25546234	28095142	26977456	30688132	28524380	30515570	26380002	34559980	23461720	34913112	27129202	37557648	32080960	34750952	24464954	28807732	18394528	25495448	28006962	38388180	31816544	20203920	22755516	35804084	32090528	34377520	24338160	33924808	25241790	23180312
1160	docosadienoate (22:2n6)	Lipid	Polyunsaturated Fatty Acid (n3 and n6)	32415	LC/MS Neg	100001182	6034	335.296	7370-49-2	5282807	C16533	HMDB61714	380776	332303	422400	609703	446581	490391	459124	360781	511162	461265	468942	492563	427078	485577	358147	388247	384489	355626	312999	364447	282353	273098	333612	249681	515943	429108	405436	367676	437969	433122	377888	234511	518041	877809	459709	731099	741404
1148	docosahexaenoate (DHA; 22:6n3)	Lipid	Polyunsaturated Fatty Acid (n3 and n6)	44675	LC/MS Neg	100000665	5525	327.233	6217-54-5	445580	C06429	HMDB02183	85627840	46043488	29013716	72351896	70333840	56853636	54724576	37984428	88757880	30176568	42970916	53352896	69120400	60568680	34096708	31161072	58513928	45030312	30655952	41258128	47715284	36597504	42666412	32770716	66032664	25002688	36748868	34955392	47071328	45712524	47099040	34438864	47083520	96565520	41725792	58358720	63029524
1364	docosahexaenoylcarnitine (C22:6)*	Lipid	Fatty Acid Metabolism(Acyl Carnitine)	57523	LC/MS Pos Late	100015845	1349	472.342					123075	57646	212838	91067	100988	145951			122801		57461	119913		135135	71558		139531	115081		52704	100345	152245			91042	94339	64597	89689	95792	142767	94052	111209	75490	155532		96022	118829
1147	docosapentaenoate (n3 DPA; 22:5n3)	Lipid	Polyunsaturated Fatty Acid (n3 and n6)	32504	LC/MS Neg	100001181	5571	329.249	2234-74-4	6441454	C16513	HMDB06528	7077348	5768416	2.66754e+06	7559572	7057529	5.29397e+06	5.20159e+06	5087601	8.16251e+06	2371468	6880604	4927618	8624005	5996517	3486464	3225585	5.19466e+06	5754924	2867717	4231479	4099130	4262561	5880801	5255064	7921186	2533637	3975996	3936342	5224547	6.03109e+06	4572281	3886969	6276873	11293015	5333502	9083993	7406866
1159	docosapentaenoate (n6 DPA; 22:5n6)	Lipid	Polyunsaturated Fatty Acid (n3 and n6)	37478	LC/MS Neg	100001580	5624.5	329.249	25182-74-5	6441454	C16513	HMDB01976	5.34452e+06	4373518	6391364	6662363	6023238	7.77688e+06	6469371	4635761	7.74486e+06	6229906	3.84302e+06	4622196	6836563	4453041	4089304	5289067	5.04623e+06	4956607	3.08899e+06	4295126	3895488	3675708	3759029	2458558	7035396	5.44319e+06	4098692	3.4624e+06	4214133	4569939	4490133	3039295	6555933	11682212	7.1599e+06	6563692	7010692
4442	EDTA	Xenobiotics	Chemical	22163	LC/MS Neg	100001002	643	291.083	60-00-4	6049	C00284	HMDB15109	6295230976	6446557696	5749761024	5783835648	5842015744	5810027520	5652729856	5670135296	6159517696	5645724672	5700758016	5913711616	6044536832	5751119872	6357003264	6549384192	6212552704	6579014656	6407261696	5867983872	6920452608	6622449152	6479021056	6318157824	6834268672	6486084608	6475154944	6521583104	6153886208	6412033024	6468830720	6642995200	6891357184	5891345920	6424175104	5715563008	5875366912
1255	eicosanodioate	Lipid	Fatty Acid, Dicarboxylate	39831	LC/MS Neg	100002951	5200.9	341.27	2424-92-2	75502			146318	169582	216014	180205	203752	184873	128383	198853	108808	225629	191618	169610	130321	173587	161290	199511	150506	100216	127441	155047	146687	174671	154770	127174	139725	148325	177279	244191	120579	180736	157806	124753	153141	217881	194679	166960	155442
1146	eicosapentaenoate (EPA; 20:5n3)	Lipid	Polyunsaturated Fatty Acid (n3 and n6)	18467	LC/MS Neg	2050	5450	301.217	10-2005-9;10417-94-4	446284	C06428	HMDB01999	9587460	8922801	3273352	9691787	8406906	6.81218e+06	8394592	7569347	10361319	3397023	8771778	7605162	13891889	8742287	5098256	5951354	7634679	8073618	5449231	6833740	6.94004e+06	7097773	7.92492e+06	9087332	11692115	3006253	6174701	5976456	8818639	9851625	6427786	6133156	10169181	12578781	8227671	12027896	12991482
1129	eicosenoate (20:1)	Lipid	Long Chain Fatty Acid	33587	LC/MS Neg	100001335	5950	309.28		5282768	C16526	HMDB02231	14514613	14909599	10732717	23198168	17243784	15544608	15912275	13942431	17389640	13268775	22962940	10739280	17558476	16032877	14953658	16090313	17723932	18306320	11821977	15381231	17254292	10513642	13034210	13447613	24395048	11520126	14710901	14699212	14593389	17628320	13571524	8891160	18026906	34854520	19113280	33260200	25143652
1359	eicosenoylcarnitine (C20:1)*	Lipid	Fatty Acid Metabolism(Acyl Carnitine)	57519	LC/MS Pos Late	100015838	1484	454.389					1103974	789181	1211864	1302566	957299	809070	513026	550206	773296	447104	709047	919845	953411	912671	707194	532217	1078755	727473	496212	546376	993418	1132793	506136	647564	903256	932891	897333	1170738	1081671	1346028	728394	944749	905041	1446781	669558	1144347	1081507
3753	equol glucuronide	Xenobiotics	Food Component/Plant	41948	LC/MS Neg	100003895	3215	417.119					233353	1226368	1649070	763575	860863	918408	261523	2092649	515393	921644	1279727	1175349	2622557	1620915	1.79439e+06	859956	543621	835783	1504829	2174542	1456545	1181174	652011	696193	1207249	858834	1494900	1123662	832374	480463	1311653	732421	1531147	1.04225e+06	1050732	442125	770099
3754	equol sulfate	Xenobiotics	Food Component/Plant	40478	LC/MS Neg	100003429	3630	321.044					2944783	16277699	24836438	11746873	9911093	10613213	3.3435e+06	15862025	5618796	9082655	6862601	12810691	26797016	7875110	12966460	18152660	7.54323e+06	11963587	16002490	24121202	21287568	9353926	7919575	5593479	19249462	8845467	18209560	16139037	10032580	7758646	16655930	9789271	14951650	14904189	11107435	7.05346e+06	8656724
3755	ergothioneine	Xenobiotics	Food Component/Plant	37459	LC/MS Pos Early	100002154	850	230.096	58511-63-0	3032311	C05570	HMDB03045	6550933	10289464	13349103	8573190	10637574	14205661	8983344	12455133	12825576	15784610	13968338	9642879	14226283	12959044	12330149	18597296	9634573	9403986	16179521	10063615	19141826	17342942	16178811	15802205	12762875	21982028	12210986	13547337	15022856	16137064	14682187	15076276	13588864	11983252	11679337	11949381	8249936
1134	erucate (22:1n9)	Lipid	Long Chain Fatty Acid	1552	LC/MS Neg	1087	6355.6	337.311	112-86-7	5281116	C08316	HMDB02068	1.5889e+06	1665834	1159880	1.81028e+06	1921244	1463345	1576200	1346849	1.75212e+06	1800144	1.67126e+06	1100831	1363157	1185286	1399040	1664427	1519070	1479024	1606646	1158491	1304436	1191540	1.73536e+06	1360972	2989411	1399307	1804317	1546271	1316571	2056669	1753052	941885	2526076	2890370	1.56921e+06	3441607	2570307
1360	erucoylcarnitine (C22:1)*	Lipid	Fatty Acid Metabolism(Acyl Carnitine)	57525	LC/MS Pos Late	100015841	1535	482.42					75951		74585	138655	74048							126810		65979			94579							53719		97989	80777	89861	104096		49429	91080		132493	70807	165799	107499
3757	erythritol	Xenobiotics	Food Component/Plant	20699	LC/MS Polar	100000846	1491	167.056	149-32-6	222285	C00503	HMDB02994	287941	289391	320724	337222	262505	201143	350481	297665	220770	233279	302830	311494	337108	291773	319170	247341	299783	285590	368134	328078	274321	252033	304577	237188	300919	254461	346636	322129	225287	289781	366110	264932	278282	296886	431897	249610	307240
1046	erythronate*	Carbohydrate	Aminosugar Metabolism	42420	LC/MS Polar	100001320	2186	135.03	88759-55-1	2781043		HMDB00613	7602230	7945636	9114669	3590909	7839793	6156626	8339143	9285301	7639041	5.44119e+06	9863565	9310500	8374844	9029611	8840566	5.35052e+06	7932364	8989765	8340707	9064065	9611546	8339165	9553969	9837886	6271222	6347857	10879588	10190898	9054447	11450901	8713336	8078209	9770245	10083961	9251724	8539289	9019785
4381	ethyl glucuronide	Xenobiotics	Chemical	39603	LC/MS Neg	100002849	793	221.067	17685-04-0	152226		HMDB10325	406872	662851	1198750	2357496	1102396	990611	161335	648084	747054	976658	778716	454989	264793	483235	289420	226915	649053	482476		107458	463714	416368	458322	460919	31651	224001	486645	857995	612067	584725	113664	184742	754082	860709	906418	1067439	1009990
288	ethylmalonate	Amino Acid	Leucine, Isoleucine and Valine Metabolism	15765	LC/MS Polar	2054	2785	131.035	601-75-2	11756		HMDB00622	1765154	2220266	3012481	1828295	2.04397e+06	1721698	1957670	2155639	2.05153e+06	1681522	1782257	1493606	2513800	3009775	2031156	1593427	1740749	2202822	1733493	2039901	3362827	1856904	2506202	2852583	1273701	1817628	2206843	2098038	1716492	1996801	1831179	1734146	1952811	2403296	1647841	2136278	2592816
3364	flavin adenine dinucleotide (FAD)	Cofactors and Vitamins	Riboflavin Metabolism	2134	LC/MS Neg	327	2425	784.15	146-14-5;84366-81-4	643975	C00016	HMDB01248	89800	80555	80871	123041	130382	72168	65692	95269	83121	86913	106845	93441	129850	129321	58374	37448	79090	137564	99746	100943	97230	98358	74058	108368	117825	149735	99560	128511	172094	154153	79105	93260	184881	162509	160742	165650	163319
3759	ferulate	Xenobiotics	Food Component/Plant	35630	LC/MS Neg	100001542	1755	193.051	537-98-4	445858	C01494	HMDB00954	504208	203042	232852	183278	259022	224563	336229	250199	485082	600551	114236	129292	465005	162030	240085	214084	111960		391880	230966		180517	125860		255229	428229	177904	216620	95015	69308	275859	201929	335534	239475	286618	273391	61644
3760	ferulic acid 4-sulfate	Xenobiotics	Food Component/Plant	47114	LC/MS Neg	100005389	1225	273.007	86321-29-1	6305574		HMDB29200	2422731	2558931	1845586	1848406	2223158	1248470	2117781	3022868	1678166	2519635	1228772	1722577	4940536	3409742	2677741	1459376	865834	638418	4890674	2398808	2806988	1744617	2334621	869259	2966880	2848691	2667880	2880732	886620	795582	3272908	3032903	4805315	2111494	4233049	1280734	633779
71	formiminoglutamate	Amino Acid	Histidine Metabolism	43493	LC/MS Pos Early	100002500	1880	175.071	816-90-0	439233	C00439	HMDB00854	3509344	2314151	1852906	2249441	2834974	2054086	3158721	1777231	2.33816e+06	2163956	3803143	2447379	2789931	2327736	2717142	1659615	3092600	1904387	3240979	2029417	2174189	2.4576e+06	2716458	1621650	2238329	2257461	2365803	2216040	1332297	2945796	2854532	2197820	2729090	2211581	2975939	2757227	3348376
971	fructose	Carbohydrate	Fructose, Mannose and Galactose Metabolism	577	LC/MS Polar	878	2022.2	179.056	57-48-7	5984	C00095	HMDB00660	571496		1.01946e+06	621112	662677	655284	753478	733317	830621	848621	683467	469583	686370	807212	377762	642770	471504	389237	913092	802043	1063513	502442	432918	644480	660449	555481	367006	462521	662754	588564	568321	703752	931654	580791	736222	492137	437397
1063	fumarate	Energy	TCA Cycle	1643	LC/MS Polar	330	3084	115.004	100-17-8	444972	C00122	HMDB00134	2633517	3889379	5311824	2432237	4.02629e+06	2621599	3.28732e+06	3634111	3199687	2715812	3641757	2329835	3822024	5229385	3131510	2800072	3.33016e+06	2479089	3883321	3495497	4932206	2777724	4806428	4.06374e+06	2067255	2.99665e+06	2787204	2518001	1844875	1757040	3379365	3125864	2.03776e+06	2042124	1.95583e+06	1820726	2755219
996	galactonate	Carbohydrate	Fructose, Mannose and Galactose Metabolism	27719	LC/MS Polar	100001026	3085	195.051	299-28-5	128869	C00880	HMDB00565	1360774	691779	795999	733264	995199	483836	922379	1109264	1.00397e+06	965884		1165674	842397	1104712	689209	794382	873103	445411	808067	791840	813549	638012	757090	725096	646740	666414	1092273	1285597	620147	679955	969026	650702	924464	889773	1266258	1157160	655293
421	gamma-glutamylalanine	Peptide	Gamma-glutamyl Amino Acid	37063	LC/MS Pos Early	100001843	1986	219.098	5875-41-2	440103		HMDB29142	720573	313961	476718	556105	363308	461295	626599	553843	305503	533093	529030	387331	656459	589338	342207	126781	498178	304033	414287	444526	675286	309742	496092	352895	420074	533047	367619	364586	463788	415640	410110	435888	611327	459831	761957	738437	443009
429	gamma-glutamyl-alpha-lysine	Peptide	Gamma-glutamyl Amino Acid	55015	LC/MS Pos Early	100010901	2784	276.155		65254			4965920	2908703	2400068	4733115	2405070	1510375	3365834	2988430	3135774	1737479	2263620	2487271	3466490	4456370	2833360	1444737	2580293	2464654	2937843	2814749	4391694	2815229	2951811	2279762	2378874	2676182	3.47162e+06	3359401	1662535	2163848	4050137	4261426	2798695	3105826	3.61699e+06	2664973	2395120
423	gamma-glutamylglutamate	Peptide	Gamma-glutamyl Amino Acid	36738	LC/MS Pos Early	331	1775	277.103	1116-22-9	92865	C05282	HMDB11737	436800	490068	712535	553227	456990	383346	393879	460506	519344	464877	530255	464001	541285	754199	528218	629477	769913	400320	665548	577903	798129	591435	789445	679872	459495	992675	662148	735893	608872	618488	517425	716283	756026	609527	818232	718121	765278
424	gamma-glutamylglutamine	Peptide	Gamma-glutamyl Amino Acid	2730	LC/MS Pos Early	1140	1430	276.119	10148-81-9	150914	C05283	HMDB11738	20272756	14906891	24790092	17930378	17204836	19008372	12812623	17062948	17986736	24144872	18452290	19257942	18228132	16762783	18691490	22089684	26785628	20158400	20343828	16907848	29957386	23135716	24621284	19241264	16405583	33175936	21977644	22399888	22222772	27043436	20416208	19856332	25519484	23413400	26437102	27668056	35621460
425	gamma-glutamylglycine	Peptide	Gamma-glutamyl Amino Acid	33949	LC/MS Pos Early	100001294	1535	205.082	1948-29-4	165527		HMDB11667	6735672	6919662	9871290	6844345	5505159	5347193	5901635	6631438	7341420	7465826	6789952	6082925	6038826	8721755	6639112	6018894	6760402	5127282	8361296	6283697	10912239	6758297	8660308	5803106	6400539	11524522	8672666	6410039	6072066	7227559	7154221	8743797	9957479	7445926	9058349	7989233	10552248
426	gamma-glutamylhistidine	Peptide	Gamma-glutamyl Amino Acid	18245	LC/MS Pos Early	1235	2740	285.119	37460-15-4	7017195			700242	373875	901334	569773	502696	573049	511102	472697	438917	604256	458357	399760	543073	582978	414424	497107	730587	404940	486431	478903	582824	409930	462766	318919	325369	902179	615238	488947	361114	465017	614687	489134	572647	534353	717884	751504	636263
427	gamma-glutamylisoleucine*	Peptide	Gamma-glutamyl Amino Acid	34456	LC/MS Pos Early	100001485	2940	261.144		14253342		HMDB11170	711667	572348	511425	508504	714367	359204	652841	585088	226307	319834	480027	626773	199269	611631	507503	304850	929136	587613	893280	597401	1024612	495579	671642	523144	530677	370301	841077	655054	465254	512874	623810	779307	583263	636682	669572	544604	771635
428	gamma-glutamylleucine	Peptide	Gamma-glutamyl Amino Acid	18369	LC/MS Pos Early	1268	2991	261.144	2566-39-4	151023		HMDB11171	3723918	3684307	2903481	3687983	3.67603e+06	2864866	4201572	3207387	2797705	2962225	4052628	2802206	2419346	3545767	3618172	2624855	4365136	2758057	5374447	4119379	5483711	3975174	4483134	2893803	3179280	3456303	4509307	4050487	4007092	3554729	3827669	3845863	5733860	3727482	5769578	4752999	4798191
431	gamma-glutamylmethionine	Peptide	Gamma-glutamyl Amino Acid	44872	LC/MS Pos Early	100001313	2640	279.101	17663-87-5	7009567		HMDB29155	8413305	5698132	6120425	7456767	4891707	4034818	6702263	4693106	5633309	4978655	4175185	4189287	6407181	6.54677e+06	6080971	4096287	4730329	3561800	7165941	6142226	7100696	4567824	6219203	2609805	6076877	7133808	5892660	5253226	4210616	4888208	7468834	7368070	9298533	6.97606e+06	9327924	7.31693e+06	5865550
432	gamma-glutamylphenylalanine	Peptide	Gamma-glutamyl Amino Acid	33422	LC/MS Pos Early	100000491	2992	295.129	7432-24-8	111299		HMDB00594	1582975	1535530	2127616	1586803	1517610	1563762	1724955	1293944	1267531	2567237	1486320	999207	1.03023e+06	1488083	1431533	1.97591e+06	1440745	1076986	2.02281e+06	1568364	2162423	1269188	1755358	1025094	1266158	3659338	1853182	1720795	1449009	1412931	1577539	1871393	3098221	1606684	2655479	2435695	1952171
434	gamma-glutamyltryptophan	Peptide	Gamma-glutamyl Amino Acid	33947	LC/MS Neg	100001295	1960	332.125	66471-20-3	3989307		HMDB29160	502726	273058	763022	516955	280235	282866	428817	340994	500414	349104	259842	315771	432147	470461	363260	219551	338941	253348	459174	477713	534454	256700	365753	200377	311982	660584	511035	457279	439582	341516	389884	394355	536223	590920	670596	418730	692465
435	gamma-glutamyltyrosine	Peptide	Gamma-glutamyl Amino Acid	2734	LC/MS Pos Early	1102	2508	311.124	7432-23-7	94340		HMDB11741	2643070	1966530	3.79197e+06	2.73314e+06	1618659	2058077	2207601	1793571	1786721	2726840	1278641	1035397	2602207	2256505	2.00657e+06	1974356	2273273	1449729	3.21803e+06	2733971	2668352	1429559	2208751	992014	1802769	5123543	2458230	1432803	1207520	1.42368e+06	2648486	2587263	2694070	1708048	2471442	1661904	1697940
436	gamma-glutamylvaline	Peptide	Gamma-glutamyl Amino Acid	43829	LC/MS Pos Early	100001126	2700	247.129	2746-34-1	7015683		HMDB11172	4978509	3738446	4312330	4728047	3755922	3120993	4746767	3748383	4094336	3182282	3851476	4689734	4670075	4663544	3973392	3.3053e+06	6641984	3346146	5470894	5479381	5440645	4112000	4630015	3306799	3477576	4.00024e+06	5588218	4613388	3877118	4126143	4768520	4788377	4544337	4641067	5250266	4830302	5.59995e+06
3397	gamma-tocopherol/beta-tocopherol	Cofactors and Vitamins	Tocopherol Metabolism	52473	LC/MS Pos Late	100008998	2384	416.364					2086981	1302382	2419616	851446	1.93562e+06	1953813	2503407	652252	1856147	1.83646e+06	2.02011e+06	1282461	1654263	1080472	1351823	505328	969224	1180112	221292	844608	1522563	1570039	1062080	304918	1.03546e+06	830792	1468480	2104715	722418	754468	296435	333919	1.75296e+06	2.01162e+06	1174841	1348862	1453197
3612	genistein	Xenobiotics	Food Component/Plant	32448	LC/MS Neg	100001221	3754	269.046	446-72-0	5280961	C06563	HMDB03217	91894	90161	130260	26713	104029	108734	89882	82020	102323	181555	34763	35661	109476	70672	71146	87714	33001	86333	103455	102577	144057	82737	75508	22827	104990	172026	98037	55685	22316		45044	70851	42890	84091	148622	67327
3681	gluconate	Xenobiotics	Food Component/Plant	587	LC/MS Polar	338	2922	195.051	527-07-1	10690	C00257	HMDB00625	963111	840330	712757	575786	934132	695507	889515	638410	858050	847766	935628	563571	1149107	981331	684192	530850	921075	735963	780993	490883	1243945	853580	774459	554420	532404	823292	942639	367788	783229	696347	1526681	837203	1335458	1360080	968504	897645	1.03459e+06
865	glucose	Carbohydrate	Glycolysis, Gluconeogenesis, and Pyruvate Metabolism	48152	LC/MS Polar	572	2342	225.062	50-99-7	79025	C00031	HMDB00122	1302511616	1175335168	894382080	1034850944	1296789504	1042547584	1083737216	1118778368	1216556672	832958912	1158249984	1133272704	1383847296	1240669312	1220679936	763061120	1134383488	1212587520	1199313664	990241280	1295785856	1160414464	1129672448	1070867968	1158589568	936118208	1185116288	1112856576	1049294208	999759744	1374015104	1147353600	1009761728	1095834112	953751040	936899456	924310400
1023	glucuronate	Carbohydrate	Aminosugar Metabolism	15443	LC/MS Polar	100000257	3233.3	193.035	207300-70-7	444791	C00191	HMDB00127	2.85861e+06	2021079	1996240	1718977	2340507	1697090	2007261	2073449	2568927	1710673	2249887	1811145	3.53575e+06	2141979	2088365	1227266	2469579	2118810	2.01158e+06	1740385	3.60715e+06	2.49206e+06	1834117	1752899	2183867	2231502	2306086	2130262	2563670	1740071	2218611	1.96716e+06	2693944	2561870	2248309	2091615	2519140
40	glutamate	Amino Acid	Glutamate Metabolism	57	LC/MS Pos Early	561	1500	148.06	56-86-0	611	C00025	HMDB00148	79454448	117771304	194223280	92832448	132433568	124753808	100239904	105842768	176159904	228721376	138976352	96156264	88752152	199020912	106158328	161400448	102342464	85428432	89422192	103942872	140441392	103610544	172814784	86698664	74619968	225920928	134654912	125114016	131443264	115372248	83820928	91011768	108920296	135735472	167528080	103851592	127826760
41	glutamine	Amino Acid	Glutamate Metabolism	53	LC/MS Pos Early	563	1291	147.076	56-85-9	5961	C00064	HMDB00641	1795154432	1557156608	2419526400	1692025984	2157371136	2278862080	1412489728	1633155200	1875958912	2857651200	2011551232	2035622912	1872862592	1818230400	1733787008	2435102208	1997131520	1934535808	1579087744	1632637952	2271123968	2161121024	1916740736	1719584000	1450175488	2266233856	1633054208	1732779904	1925994112	1950445824	1695999744	1693446144	1745692928	1883689856	1704207616	1781630208	2159855360
98	glutarate (pentanedioate)	Amino Acid	Lysine Metabolism	396	LC/MS Polar	339	2900	131.035	110-94-1	743	C00489	HMDB00661	514110	1031126	990387	561800	1092271	492558	963574	541386	864936	836443	854005	672323	593766	612951	602241	538180	831338	661919	624764	1155633	1126867	538609	860844	651905	481588	366095	1169530	659759	482654	359763	681179	607193	609569	422208	528225	212257	399839
99	glutarylcarnitine (C5-DC)	Amino Acid	Lysine Metabolism	44664	LC/MS Pos Early	100001593	2393	276.144	102636-82-8	71464488		HMDB13130	748875	535660	785341	797238	1106468	989644	485436	626587	737452	616944	1.01789e+06	756297	620903	928846	711584	620175	684138	660552	737210	653932	983719	516677	1054204	539895	585600	640155	709503	690522	898648	786719	708062	731038	784596	726946	713644	650569	870699
402	glutathione, oxidized (GSSG)	Amino Acid	Glutathione Metabolism	27727	LC/MS Pos Early	448	2667	613.159	103239-24-3	65359	C00127	HMDB03337	1318585	1494862	1278405	1957735	1432360	1354891	1481742	1683073	1336676	1036400	1.94784e+06	1971249	2179053	3058674	1904626	1423425	3032303	1529970	3438437	2163808	2960801	1905085	2900551	1829386	1693888	3357437	3191236	2313971	3388352	2398524	2642206	2480484	2629473	2354727	3153920	2588750	2900024
885	glycerate	Carbohydrate	Glycolysis, Gluconeogenesis, and Pyruvate Metabolism	1572	LC/MS Polar	1052	2070.4	105.019	600-19-1	752	C00258	HMDB00139	882920	3797634	2756276	3005982	2431279	2399325	3449322	2863607	852093	2541456	3280418	2994560	2966756	3137864	3042604	3.3634e+06	1011430	2854470	3595994	4.15381e+06	784222	2951518	3.81667e+06	3645792	2156599	2124836	3679230	3685710	751478	4093605	3010812	2658677	1303985	2857972	2320122	3260911	2990099
2122	glycerol	Lipid	Glycerolipid Metabolism	15122	LC/MS Neg	1254	758	91.0401	56-81-5	753	C00116	HMDB00131	26915742	25720794	34185248	22712638	15557697	42602596	30994164	16935138	19593956	23186284	28760080	25069884	48761564	36030480	23315868	28501472	36905976	25989014	29956674	24698576	32942914	22638510	41382076	28443028	33581880	36829940	18754452	20853766	21146076	33762616	35021632	22965902	22341656	32635452	14909898	20621012	54683996
2123	glycerol 3-phosphate	Lipid	Glycerolipid Metabolism	43847	LC/MS Pos Early	100000258	580	173.021	29849-82-9	754	C00093	HMDB00126	2581647	2549106	3280436	3066680	4269500	2842635	2887917	3024345	3551334	2749622	4446551	3.52363e+06	3.64083e+06	5980162	3.9311e+06	3144356	4729685	3.55076e+06	3.94549e+06	3787862	3.41003e+06	3789943	3977491	3853138	2507727	3234379	3.52477e+06	3.95831e+06	3420289	4283151	2707338	2627749	3388972	3132786	3389941	2818258	3154814
1598	glycerophosphoethanolamine	Lipid	Phospholipid Metabolism	37455	LC/MS Polar	100001620	3075	214.049	33049-08-0	123874	C01233	HMDB00114	143096	157268	155771	175432	208491	124492	182700	181359	182597	192563	201826	193792	229000	152586	180179	157593	102348	179557	128229	163633	154580	181735	161344	180474	149498	240695	187164	192937	193707	178111	169146	155640	204820	246947	242506	260817	215729
2128	glycerophosphoglycerol	Lipid	Glycerolipid Metabolism	48857	LC/MS Polar	100001619	2430	245.043		439964	C03274		172401	188482	177345	166680	219392	133270	211575	155354	175968	199586	286202	196109	213500	176761	179847	123185	241114	193132	198746	153845	212191	242579	138640	177149	216917	256627	255381	210952	189630	273013	187232	137613	254135	247307	363807	216347	198329
1594	glycerophosphorylcholine (GPC)	Lipid	Phospholipid Metabolism	15990	LC/MS Pos Early	100000269	672	258.11	28319-77-9	71920	C00670	HMDB00086	80998336	84034136	32639100	83971728	97853152	34320112	67484056	68480120	70549768	34232728	68657296	88864464	79032232	74227360	75718688	30364456	80664792	86923416	86905008	80396336	112616784	91779176	68599648	74377392	101509000	68549848	83964256	71751408	104609112	83154760	81555232	90049096	66431540	71945104	73593048	77788504	85943624
1	glycine	Amino Acid	Glycine, Serine and Threonine Metabolism	58	LC/MS Pos Early	340	1375	76.0393	56-40-6	750	C00037	HMDB00123	55531908	55743832	88756720	52185464	59505556	62077408	47126624	52910384	65253476	87185720	59832808	44094608	51634488	63547600	53182296	79479608	50148096	53070404	51772580	51548720	70684888	58168904	56508448	40726616	54357444	84555736	54610348	49697532	47844720	53635704	47015412	56093168	63376964	54096944	62013376	58776176	64282576
2556	glycocholate	Lipid	Primary Bile Acid Metabolism	18476	LC/MS Neg	342	5163	464.302	475-31-0;863-57-0	10140	C01921	HMDB00138		54492	1266362		84544	784504				1521301		30892				1017649				88842		123045				1366165	79100		57526	50886		40637	104298	173607	169459		111756
2643	glycosyl ceramide (d18:1/20:0, d16:1/22:0)*	Lipid	Ceramides	57595	LC/MS Pos Late	100015882	3414	756.635					641418	558560	501513	1.01899e+06	548785	538836	649415	422524	434442	177347	748839	687049	649269	640091	480263	157463	427172	546278	397884	503483	792401	942962	394210	643539	562025	514984	558379	710182	965643	878890	676926	559746	599764	786967	448342	692632	402093
2286	glycosyl-N-palmitoyl-sphingosine (d18:1/16:0)	Lipid	Sphingolipid Metabolism	53013	LC/MS Pos Late	100009272	2623	700.572					4634188	3060830	4069578	6216293	3394346	4543845	5528413	3041347	3508163	2595856	5120448	5132871	4827441	3.69871e+06	3233074	1650488	2841171	3186793	2843452	3.67318e+06	4608811	5770540	2238314	3374024	4.14828e+06	6548899	3.39028e+06	4314442	9179160	6836114	2910399	4.1175e+06	7635890	7.95217e+06	6462748	9738869	7.5129e+06
2287	glycosyl-N-stearoyl-sphingosine (d18:1/18:0)	Lipid	Sphingolipid Metabolism	52234	LC/MS Pos Late	100001882	3053	728.604					2607672	1456069	1056558	3625055	1347920	1432408	1675593	899769	1153651	276718	1867606	2581931	1948604	1459761	1232184	331004	851673	1706020	1271903	1170863	2714535	2959738	1126453	1814034	1932235	1747781	1743091	2760744	5797729	3118458	1544657	1.82502e+06	2.01887e+06	3323347	1516734	2187701	954380
2328	glycosyl-N-tetracosadienoyl-sphingosine (d18:1/24:2)*	Lipid	Sphingolipid Metabolism	57452	LC/MS Pos Late	100015703	3380	808.666					1087029	763117	817854	1281483	635617	895131	1063153	602794	807494	498601	815411	959972	838873	729260	795270	435822	771438	692263	640890	764492	1039036	1163485	538014	735682	865180	1056786	795155	1.01622e+06	1297615	1312228	745100	1112779	1122064	1380389	915838	1243737	1080789
373	guanidinoacetate	Amino Acid	Creatine Metabolism	43802	LC/MS Pos Early	344	1937	118.061	352-97-6	763	C00581	HMDB00128	1270305	990905	2263687	1069907	1088582	1342646	1148783	1183870	1697303	2940160	1410757	1152912	895490	2592255	954688	1126363	980961	708710	792249	953731	1253070	629418	1377123	686726	694175	1814253	937480	1057330	714294	901484	858372	788613	573996	1466795	1276368	945604	1042567
3382	gulonate*	Cofactors and Vitamins	Ascorbate and Aldarate Metabolism	46957	LC/MS Polar	100001586	2750	195.051	20246-53-1	9794176	C00257	HMDB03290	8204225	4515372	5365860	8856091	10122494	3642032	10299735	10182370	7085121	4416199	12275834	10583077	7032435	12059337	5576790	4508573	11156627	8524560	8094368	10162929	6586571	5488721	8793946	8703396	6409256	4274135	12411743	10728452	7765858	10279301	12729316	7284077	11256221	10944087	8002511	12770080	7605674
3419	heme	Cofactors and Vitamins	Hemoglobin and Porphyrin Metabolism	41754	LC/MS Pos Late	100001386	1124	616.176	14875-96-8	26945	C00032	HMDB03178	15706583	18989360	7688481	15831080	14833077	14013952	11119142	13565801	24497520	14396767	13092990	11855739	31781324	19817986	14257177	11472133	20349720	9495657	21131812	11553562	27812294	24699038	10751375	12344639	28187150	30462328	10018123	4256236	35932152	12914601	26217834	29756878	27981008	28123652	15254581	14030452	23928416
1253	hexadecanedioate	Lipid	Fatty Acid, Dicarboxylate	35678	LC/MS Neg	100001614	4615	285.207	505-54-4	10459	C19615	HMDB00672	351220	771659	2294882	888602	1110595	1129234	339946	613257	396979	901887	796942	639933	900248	1190794	574157	1223626	799191	987920	690984	841984	1353282	805818	1005122	1176364	790984	1087976	782656	878625	1211691	1101873	661151	486797	694156	1086911	817733	755664	1189492
1329	hexanoylcarnitine (C6)	Lipid	Fatty Acid Metabolism(Acyl Carnitine)	32328	LC/MS Pos Early	100000781	3308	260.186	6920-35-0	6426853		HMDB00705	2399835	2865264	7196724	3279619	3427628	5.39366e+06	4601382	2346212	2554477	9876837	4114079	2809074	1.64035e+06	3720198	2633678	6732309	3319053	3537566	3904185	6313120	4464277	2731242	4622026	3123852	3103329	6693603	5.76359e+06	4153400	4540460	4396652	3215997	2736692	4190748	4976526	3715330	2921428	6356004
1316	hexanoylglycine	Lipid	Fatty Acid Metabolism(Acyl Glycine)	35436	LC/MS Neg	100001527	2900	172.098	24003-67-6	99463		HMDB00701	1850094	2090712	1949253	2925816	1790767	1232818	1534820	1744803	1663591	1114017	2456227	2252181	2112597	3949108	1579410	1421865	2782108	2654478	2543530	1981926	3546401	1841013	2614403	4.09965e+06	2545561	1528767	3756835	3518207	3233992	2809027	2753653	1984123	1835651	3102768	1485870	2.07842e+06	5353199
3452	hippurate	Xenobiotics	Benzoate Metabolism	15753	LC/MS Neg	100000014	2106.9	178.051	495-69-2	464	C01586	HMDB00714	27296974	29727592	4976421	25252716	27839156	5594531	15193904	14617063	24378614	12556822	10086108	7826663	75630488	13337120	18452498	29093098	28904558	38384528	2385423	41861508	53988808	6.30297e+06	44244980	8.33173e+06	55667672	14857302	6826154	47340136	10215180	27338280	48327060	30604776	26475236	28238596	24612284	5095496	29442936
74	histamine	Amino Acid	Histidine Metabolism	1574	LC/MS Pos Early	354	3035	112.087	51-45-6	774	C00388	HMDB00870	2066826	2175893	4398538	4495974	4030369	2991622	2462312	3.56414e+06	3815907	2698244	3127853	3570136	1.80366e+06	2.86521e+06	2608799	2.82903e+06	2278637	2.91079e+06	2483441	5023221	3394078	4745833	4641483	2451492	2530180	3505353	4.09541e+06	3439831	2370660	2520701	2437582	2878454	2660452	3239855	3.32463e+06	2581410	2481281
61	histidine	Amino Acid	Histidine Metabolism	59	LC/MS Neg	355	755.9	154.062	5934-29-2	6274	C00135	HMDB00177	43028140	26507140	35762784	27110300	35884364	32674390	23333360	25699956	28389554	41859780	30820772	27360412	28960836	27700550	27132452	34955148	27536234	26789364	26248848	28516758	25295952	29448170	23102380	20598096	30848036	35361848	27085268	27392890	20732628	22750328	26312552	27403924	27070198	22859168	29520320	29943062	25435650
351	homoarginine	Amino Acid	Urea cycle; Arginine and Proline Metabolism	22137	LC/MS Pos Early	100000961	2882	189.135	156-86-5	9085	C01924	HMDB00670	2408544	881336	427874	2227813	1.03489e+06	685368	870989	888792	1319946	345682	635029	1549965	1251671	1.95638e+06	929446	483759	852902	871286	1.00129e+06	513225	1733841	945331	618421	637915	810452	519960	1074834	740145	747520	277445	929137	1588006	196167	693650	799763		213573
352	homocitrulline	Amino Acid	Urea cycle; Arginine and Proline Metabolism	22138	LC/MS Pos Early	100000963	1908	190.119	1190-49-4	65072	C02427	HMDB00679	582684	590604	745345	979035	965970	525889	435089	492190	1537931	379000	874523	735044	1797166	639387	549923	441493	1837196	664660	673967	681063	592954	812675	557876	457950	644764	366044	642898	698947	1316352	580051	570850	555270	665229	510142	560180	1282744	923124
4148	hydroquinone sulfate	Xenobiotics	Drug	35322	LC/MS Neg	100001604	1395	188.986	123-31-9	161220	C00530	HMDB02434	136580	193195	184663	90222	176109	63304	94714	176099	151285	151207	83631	121539	276860	172518	248501	112803	32477	89287	91111	189469	231289	57058	177809	69459	213510	98930	172410	137085	78034	60486	114708	120293	195527	182678	222958	98192	89532
364	trans-4-hydroxyproline	Amino Acid	Urea cycle; Arginine and Proline Metabolism	32306	LC/MS Pos Early	1001	1064	132.066	51-35-4	5810	C01157	HMDB00725	27214846	16365700	20574928	25744020	22209648	14039515	16478932	15957600	19572958	18641086	15527880	20242844	14113221	22699686	18797998	11023698	17474138	16288229	14379625	15464706	26290240	14255972	11700735	13812200	17173964	23630940	17465276	21596346	18922164	20014396	19146628	20677666	20124812	21899872	22579842	20910608	16132746
2596	hyodeoxycholate	Lipid	Secondary Bile Acid Metabolism	27531	LC/MS Neg	100000777	5097	391.285	83-49-8	5283820	C15517	HMDB00733	2662173	414670	13392456	1221206	591785	2646136	269889	463917		6534346		314968	328230		235944	6752468	445138	138172	345950	664471	271689	492956			314750	9774709	944329	1716749	677709	2307463	1.01333e+06	390752	924989	2.03634e+06	2.08384e+06	98823	1119716
334	hypotaurine	Amino Acid	Methionine, Cysteine, SAM and Taurine Metabolism	590	LC/MS Polar	358	2763.4	108.012	300-84-5	107812	C00519	HMDB00965	152631	149565	903494	177102	136727	522378	204404	136023	161157	1148658	126981	95250	156341	307141	152332	644566	170111	137904	225066	140050	207082	123602	190207	82020	129318	1487604	216495	166587	137670	111726	187516	194528	179897	167127	258853	166060	153025
3193	hypoxanthine	Nucleotide	Purine Metabolism, (Hypo)Xanthine/Inosine containing	3127	LC/MS Pos Early	171	1295	137.046	68-94-0	790	C00262	HMDB00157		5994555	22999812	167349	1.72962e+06	1.58342e+06		1751770			26152972			55475784	3605224	3224726	3263020	8642975	26432086	8409798	528726	289853	15567523	824519	135485	372704	690818	417033		483028	2063281	4667076	78658		190733
72	imidazole lactate	Amino Acid	Histidine Metabolism	15716	LC/MS Pos Early	100000263	2040	157.061	14403-45-3	440129	C05568	HMDB02320	663414	500742			468756	656980	947775			575926	566326		620671	1152698		387033	827273	380379	497233		503290		541229									680071	316321	420577		942361	729064
70	imidazole propionate	Amino Acid	Histidine Metabolism	40730	LC/MS Pos Early	100003434	2263	141.066	1074-59-5	70630		HMDB02271	4.08364e+06	5945031	6026271	3668469	1708582	2586438	1.96978e+06	4355917	5513530	6619035	1.88644e+06	4903788	2579747	1445931	3.70945e+06	1248597	1850792	1.93659e+06	9352734	4179792	1621272	5598189	6397370	717294	4735896	5277135	2428326	9361154	4056967	3459044	10100227	1733926	3645611	4743579	2717642	3305903	6146626
4450	iminodiacetate (IDA)	Xenobiotics	Chemical	21025	LC/MS Pos Early	100000900	808	134.045	142-73-4	8897	C19911	HMDB11753	8511764	8424036	8949109	8675236	8.3734e+06	7319063	7360146	8535491	8.36148e+06	7531581	7898527	8.03427e+06	7778477	6850063	7725648	8.09745e+06	7800527	7890854	8415364	7155549	8565355	7367808	7564259	8911750	8102822	7720347	8.04981e+06	7802699	7866130	8524645	7723919	8481015	7963409	8.32433e+06	8637252	8769389	7524101
233	indole-3-carboxylic acid	Amino Acid	Tryptophan Metabolism	38116	LC/MS Neg	100002185	1708.8	160.04	771-50-6	69867	C19837	HMDB03320	74104	90532	117433	88607	106298	91990	62104	96835	85691	132750	129437	95289	96494	77883	86248	110345	67498	90557	99700	111241	83027		135056	53418	78354	78531	100016	122102	82482	80109	104052	106962	73894	106918	98570	64358	72112
226	indoleacetate	Amino Acid	Tryptophan Metabolism	27513	LC/MS Neg	100001034	2200	174.056	6505-45-9	802	C00954	HMDB00197	885426	1101027	1714240	1074197	1042734	722249	884720	831565	328163	1235261	627222	279278	827258	658306	935587	732460	763860	500872	466161	1177210	699716	713785	662893	284999	446972	654704	675462	777759	259739	694804	730555	1205377	779666	391957	660858	460957	503307
235	indoleacetylglycine	Amino Acid	Tryptophan Metabolism	54730	LC/MS Neg	100006730	2610	231.078		446640			1362616	1.97467e+06	1.67891e+06	1892310	1.74044e+06	592078	1.53925e+06	1.73739e+06	464821	845525	1159329	555193	1.48016e+06	1951102	1833752	508408	1318912	796854	825377	2171940	1181463	1109109	1105316	406657	940512	551292	1904942	1649873	448906	1125911	1534987	2125056	1716896	585153	1680757	604425	579363
3784	indoleacrylate	Xenobiotics	Food Component/Plant	22114	LC/MS Neg	100000800	2511	186.056	1204-06-4	15030923		HMDB00734		175983	473260	124398		472923	22672	317176	250365	928747	491306	312372	363231		395591	838789	46018	420579	215815	468917	262466	304724	122922	179245	291532	259686	285424	392901	142304	127206	446529	57190		386699	279239	209681	146906
225	indolelactate	Amino Acid	Tryptophan Metabolism	18349	LC/MS Pos Early	100000463	2600	206.081	832-97-3	92904	C02043	HMDB00671	8.03745e+06	6560362	8001473	7023177	7976051	8615594	9849018	6598572	8140679	10316706	9004933	7033029	9030357	9333405	8676735	11937439	6726126	6682129	11273751	8412122	7674646	7222529	14995888	6040970	7.73892e+06	12428365	8417744	7284077	5525766	6580912	7571166	8767757	10548522	6754165	9305123	7773382	6812960
228	indolepropionate	Amino Acid	Tryptophan Metabolism	32405	LC/MS Pos Early	100001083	3205	190.086	830-96-6	3744		HMDB02302		8833369	18143636	6457727		18998752	699833	11200448	8025295	34698016	16893732	14617583	6834653		14717732	27158604	2094855	12770641	10451115	13146006	9432916	11359877	3.48964e+06	7127024	12095824	15386422	11830508	13542736	6121436	7.23398e+06	18836302	2.94939e+06		13860879	12787208	9562014	5.20264e+06
3192	inosine	Nucleotide	Purine Metabolism, (Hypo)Xanthine/Inosine containing	1123	LC/MS Neg	361	1602.1	267.073	58-63-9	6021	C00294	HMDB00195	155500	1538045	4988357	304551	1235369	841632	234119	1174008	537436	353608	3099553	915205	491138	3.82327e+06	887583	892679	1098063	1.80011e+06	4692284	3.24057e+06	762256	449844	2369029	837976	313275	475354	638722	416724	736548	717134	696541	1428840	486743	713901	246798	165753	561549
3191	inosine 5'-monophosphate (IMP)	Nucleotide	Purine Metabolism, (Hypo)Xanthine/Inosine containing	2133	LC/MS Pos Early	362	650	349.054	4691-65-0	8582	C00130	HMDB00175		101652	50876			101286		236733				109431	107856	888608		152594			153978		191856	110013	84018			410759	126429	86345	235172	55823	337215	160724	223407	54875			427836
301	isobutyrylcarnitine (C4)	Amino Acid	Leucine, Isoleucine and Valine Metabolism	33441	LC/MS Pos Early	100001055	2810	232.154	25518-49-4	168379		HMDB00736	16606659	12906595	19005542	12487184	18620912	16064991	10578489	10557727	11325666	16002374	11844524	14406048	17131240	16666024	13021414	18374720	15266359	12260934	13397133	14840789	19494550	13275845	16429159	12761723	8789745	12651146	16817062	12737713	13729555	11048872	15441931	20996490	15916215	10669483	15455924	10981558	14911939
275	isoleucine	Amino Acid	Leucine, Isoleucine and Valine Metabolism	1125	LC/MS Pos Early	376	2800	132.102	73-32-5	6306	C00407	HMDB00172	663936064	560166720	596563968	576689536	805608512	547431680	542824704	563933184	707361152	591170944	736890240	707305280	693656384	650776448	665039424	640019328	848593664	778880896	669168384	682193344	776282432	739997312	674994496	601726464	597430976	451678784	648983040	676188672	679262336	722786944	658876352	587609600	603388288	619186368	614024128	612732800	777095168
252	isovalerylcarnitine (C5)	Amino Acid	Leucine, Isoleucine and Valine Metabolism	34407	LC/MS Pos Early	100001393	3085	246.17	31023-24-2	6426851		HMDB00688	5254111	4581054	4068261	4661448	6056442	7087488	5.92792e+06	4698936	4.10049e+06	10620528	6012562	4158724	4180681	6353462	5046223	5176378	4959285	4311402	6.07176e+06	8485343	6048269	4971890	3204362	3783379	4445932	7247430	6600034	5217241	4945753	3742883	4698363	5440619	8685418	4305046	6688699	5448967	4394418
251	isovalerylglycine	Amino Acid	Leucine, Isoleucine and Valine Metabolism	35107	LC/MS Neg	100001452	1950	158.082	16284-60-9	546304		HMDB00678	1461115	1.81043e+06	612973	1596880	1601913	659675	1758731	1328197	1692749	1.00424e+06	2447348	1489939	2511866	2462421	1.9012e+06	985034	1478754	2114518	3586160	2700981	2375541	2079277	1.73829e+06	2.08161e+06	2337475	1200671	3734175	2316632	1.97494e+06	1359004	1588558	2184684	2802658	1317127	1950501	1637266	1815430
1068	itaconate	Energy	TCA Cycle	18373	LC/MS Polar	100000455	2969	129.019	97-65-4	811	C00490	HMDB02092	242431	353633	339684	214912	241818	266843	264656	384887	311780	341041	237506	285444	260540	364684	252800	228296	140414	487990	237978	314278	473614	398876	261815	761753	372697	2831438	611481	1527882	1954038	2457233	256779	328616	4884164	1280804	4091870	2915895	3926971
209	kynurenate	Amino Acid	Tryptophan Metabolism	1417	LC/MS Neg	98	2224	188.035	492-27-3	3845	C01717	HMDB00715	458363	848958	821980	470064	777925	575867	560044	755569	767497	514798	681177	798917	1102438	1183082	949353	613544	511365	539043	571683	1058241	716115	508596	855386	506302	388358	721171	633334	547555	781312	510178	381552	631884	1226822	769535	754808	563261	1040535
205	kynurenine	Amino Acid	Tryptophan Metabolism	15140	LC/MS Pos Early	100000265	2739	209.092	2922-83-0	161166	C00328	HMDB00684	9409227	11039169	10562954	9716535	14599143	10155467	12663665	9336404	12914453	8376940	11603266	13248337	12298689	14389374	18952900	7017406	13560874	8905795	8880908	13050661	17750080	13990027	8474695	11840366	6831436	22820904	13942155	16762519	24823376	24937608	10610803	16362732	38894372	26180752	28545690	36134296	32907612
882	lactate	Carbohydrate	Glycolysis, Gluconeogenesis, and Pyruvate Metabolism	527	LC/MS Polar	482	1468.8	89.0244	79-33-4	612	C00186	HMDB00190	820577536	890662272	1018257344	810318208	999394176	836583040	878127872	831967360	758111488	790021504	1022653632	853909824	1104578560	1038363584	1002558016	801462464	836333632	900221824	925976256	1107220224	872115584	1008520384	808013376	919786816	766434880	862721408	839920640	861657216	718768896	873442240	814420096	792180544	1021968832	789772864	828158976	954644096	732046208
2296	lactosyl-N-palmitoyl-sphingosine (d18:1/16:0)	Lipid	Sphingolipid Metabolism	53010	LC/MS Pos Late	100009030	2527	862.625	4201-62-1																													74371									59314	123989
1335	laurylcarnitine (C12)	Lipid	Fatty Acid Metabolism(Acyl Carnitine)	34534	LC/MS Pos Late	100001392	1235	344.28	25518-54-1	10427569		HMDB02250	2528071	2302773	5944683	2253873	2108499	3567545	1493634	1644949	2001214	1486446	2583132	1941066	2319436	2436716	2382846	3896433	3288274	2531550	1.85402e+06	1835612	3839468	2682917	3542878	1995078	2717515	2664305	2394572	2464125	2410931	3880408	2627228	2080143	2231468	3246958	1471763	2063602	4922611
241	leucine	Amino Acid	Leucine, Isoleucine and Valine Metabolism	60	LC/MS Pos Early	397	2864	132.102	61-90-5	6106	C00123	HMDB00687	609234496	512658144	496010176	498674880	726282880	528628800	554212608	522387680	619024064	508323200	666823168	581304832	668807552	573031360	632353600	534081216	652329728	643084608	654560704	574553792	705204608	667170560	620417280	526952192	591050176	441890464	587457920	592724160	566279040	629103168	534592128	529538944	608326464	520744416	588762560	546706944	620151552
2260	lignoceroyl sphingomyelin (d18:1/24:0)	Lipid	Sphingolipid Metabolism	57330	LC/MS Pos Late	100006298	3437	815.7	60037-60-7				22963876	25114290	16164111	29109686	25546682	21405636	27458002	26580858	34382020	13840017	34019608	33252820	37789688	28716136	26803608	22140872	28803288	30991948	29127792	24261620	28020340	38363016	31017658	28530420	27691138	21677096	24391448	21207526	31518092	31131282	26240888	31885556	29965466	30773850	21716584	42401372	39702064
1366	lignoceroylcarnitine (C24)*	Lipid	Fatty Acid Metabolism(Acyl Carnitine)	57515	LC/MS Pos Late	100015834	1603	512.467					434376	231903	255112	501788	379997	310877	339778	242519	375840	266290	281535	341352	332764	436253	297164	244764	283146	308027	249793	233023	316674	372939	276021	263246	274467	455932	388775	407521	580056	335792	301184	350175	373324	513391	315149	501700	389401
1152	linoleate (18:2n6)	Lipid	Polyunsaturated Fatty Acid (n3 and n6)	1105	LC/MS Neg	180	5535	279.233	60-33-3	5280450	C01595	HMDB00673	835498880	810980928	455724512	1237983232	760560320	1041624832	786316736	634174464	987761088	612284480	788528320	755770944	1165222528	823061632	622553408	907065280	861472448	747310144	522903296	663417344	755479808	484280512	1026259136	617830976	1072077632	630913984	782246336	637069184	732106624	829509952	780866048	484122016	1119086976	1803532032	928267776	1529321088	1784343936
1154	linolenate [alpha or gamma; (18:3n3 or 6)]	Lipid	Polyunsaturated Fatty Acid (n3 and n6)	34035	LC/MS Neg	100001337	5450	277.217		5280934	C06426	HMDB03073	100881768	92422832	50808892	122583608	79934928	145822960	123660480	65696588	140042032	68234552	104527000	71539472	150771344	81649416	64867304	127979112	92689448	76956360	56570996	73366992	77462080	52639316	136048784	75955712	129626560	66406696	84321824	61288676	72794712	85052704	87078408	52516720	123996464	177688256	95582024	153042528	217030400
1342	linolenoylcarnitine (C18:3)*	Lipid	Fatty Acid Metabolism(Acyl Carnitine)	57511	LC/MS Pos Late	100015831	1310	422.326					2599596	1884974	3126818	1882205	1593631	2830825	1093462	1176992	1.96518e+06	1265671	1370371	1413111	1652689	2.00818e+06	1598078	2183264	2224072	1664044	1247012	1162585	2470699	1902440	2161228	1535172	1727240	2362243	1749145	1913446	2.04373e+06	2828508	1.95181e+06	1645590	1827464	2577441	1272745	1.96719e+06	3398988
1548	linoleoyl ethanolamide	Lipid	Endocannabinoid	52608	LC/MS Neg	100006726	6150	322.275	68171-52-8	5283446		HMDB12252	290806	241429	266906	296397	234766	393559	324093	303280	166002	349932	305360	282297	312337	352149	328454	352320	282592	264797	311512	283206	197547	248461	283880	253143	346271	297586	366149	240481	254001	258925	321209	167919	321015	347710	238272	281419	234285
2212	linoleoyl-arachidonoyl-glycerol (18:2/20:4) [1]*	Lipid	Diacylglycerol	54955	LC/MS Pos Late	100010922	2566	658.541				HMDB07257	2509459	1670931	2776448	1617986	2232061	1617180	1636311	1543527	2.01869e+06	1537835	1229932	1892522	1871927	2292411	1645790	994029	1400326	1413839	878555	1546105	1564581	1380693	1496503	1619124	2138737	2074712	2.08662e+06	2.07162e+06	2284231	4063757	1467989	1759594	5925821	3927049	3393328	4381413	2555057
2213	linoleoyl-arachidonoyl-glycerol (18:2/20:4) [2]*	Lipid	Diacylglycerol	54956	LC/MS Pos Late	100010923	2624	658.541				HMDB07257	4553503	3086815	3640536	3147664	3198314	2605512	3919414	3037586	3140680	2305844	3474876	2904324	5590714	4613526	2395762	1423169	2175285	2625319	2087355	2795829	3135478	2731009	2165012	2823011	4005222	2182249	2583376	2426013	4103847	5822105	2.07252e+06	2567475	6.20487e+06	6940110	4623041	5518629	4014085
1341	linoleoylcarnitine (C18:2)*	Lipid	Fatty Acid Metabolism(Acyl Carnitine)	46223	LC/MS Pos Late	100003151	1430	424.342	36816-10-1	6450015		HMDB06469	17119226	12079559	19105380	13598498	10149463	15708296	6.78883e+06	8.08331e+06	12385978	8516075	8521243	10992476	10967158	14086266	10140315	11650143	15999039	10913815	7561305	7.64674e+06	13748266	11939257	12831187	10842393	12262153	15987832	12153271	14372496	13379305	19779956	11122311	12650243	13125075	19697016	8555908	16006992	24840784
2217	linoleoyl-docosahexaenoyl-glycerol (18:2/22:6) [2]*	Lipid	Diacylglycerol	54950	LC/MS Pos Late	100010929	2468	682.541				HMDB07266	3457496	1479862	2074162	2109924	2199030	2197694	1120808	1607093	2536468	935673	931329	1.88725e+06	2513012	2622273	1258924	950933	1448818	1470368	990196	972683	1384924	1336283	1.03955e+06	1319843	2086535	1365944	1211162	1843615	1839516	2828310	2280301	2149893	2417451	3782170	1471744	1369694	1270192
2204	linoleoyl-linolenoyl-glycerol (18:2/18:3) [1]*	Lipid	Diacylglycerol	54963	LC/MS Pos Late	100010926	2426	632.525				HMDB07249	1317233	1071267	327507	587472	1296419	1012169	1682703	1289122	958569	1019456	888408	567800	2137852	692100	1.01862e+06	604767	622458	361899	850508	1053267	403290	641296	552079	654861	1163915	467496	762627	818917	375908	739954	732073	777262	1635824	1097138	1297551	702638	430130
2202	linoleoyl-linoleoyl-glycerol (18:2/18:2) [1]*	Lipid	Diacylglycerol	54968	LC/MS Pos Late	100010941	2689	634.541				HMDB07248	4350901	1562984	708144	1606764	2377459	1588816	2847440	2012437	2674041	1717975	1688214	1381481	3.76556e+06	1843403	1203696	840470	1081392	745820	1043878	2004485	1079031	951472	923301	1140544	1640240	786151	1508879	1583488	1755947	1491834	1271455	1412514	2735311	4142401	1846839	2175652	1906079
83	lysine	Amino Acid	Lysine Metabolism	1301	LC/MS Pos Early	407	2850	147.113	56-87-1	5962	C00047	HMDB00182	1986261376	1235395584	1230125568	1790560896	1416124928	994791552	1280332032	1147629696	1467459968	1079827456	1174888832	1397370880	1538951552	1691483264	1313948928	1104211712	1171611520	1362265344	1372026368	1230812544	1504452608	1388315264	1112786816	983180480	1367824640	1095603584	1194487552	1206596480	1028087872	1035505024	1357273216	1454376704	1233025152	1171430528	1318372864	1162005376	958978816
1064	malate	Energy	TCA Cycle	1303	LC/MS Polar	409	3343.1	133.014	6915-15-7	525	C00149	HMDB00156	76749616	99155408	139416320	58935604	101339368	65403164	130086880	102398648	76007448	74062488	81430120	74399296	99339584	122243032	70904480	86556016	69506736	48918280	132650912	113560416	109624880	80373192	142690144	135749968	50011824	49568624	70202376	84450280	39183788	35275088	99372816	69109600	49290128	46760064	42430320	92240792	49455408
1241	maleate	Lipid	Fatty Acid, Dicarboxylate	20676	LC/MS Polar	100000707	2510	115.004	110-16-7	444266	C01384	HMDB00176	474948	460178	238728	391939	350588	188934	482009	313202	270547	180415	349545	238478	450863	362714	473554	274096	292250	240554	361323	324255	271977	248885	470109	302709	318578		386564	149914	262891		502948	388337	282507	271124	408993	183945	436700
1080	malonylcarnitine	Lipid	Fatty Acid Synthesis	37059	LC/MS Pos Early	100001526	2086	248.113	853728-01-5	22833583		HMDB02095	34487		53953		70903	48934	42942	48117	25184		98820	56992	85528	166135	30709		70869	33578		59900				35470		36785			75132	81330				104545
976	mannitol/sorbitol	Carbohydrate	Fructose, Mannose and Galactose Metabolism	46142	LC/MS Polar	100001740	2320	181.072		5780	C00794	HMDB00247	2256056	1997129	2100903	1866225	2376842	2217676	2279514	1923085	2766375	2305834	2544068	2314107	2462266	2609619	3254477	1864652	2325898	2506959	2397321	1731440	2768634	2009302	2489025	2381090	2183924	2009604	2634504	2874702	3268714	1663666	2630748	2163984	3080687	3497454	2117712	1619436	1646676
977	mannose	Carbohydrate	Fructose, Mannose and Galactose Metabolism	48153	LC/MS Polar	803	2200	225.062	3458-28-4	18950	C00159	HMDB00169	8.17343e+06	4556927	6787088	6151953	6.73652e+06	4278041	4526226	4620908	7484578	4835058	6024283	7010602	4534851	6715746	4913655	3.90375e+06	6354069	6326673	5652785	4750952	7320978	6733711	5078323	5918649	6471445	5271755	6039082	6542162	8158189	6816564	6.888e+06	6513648	6770552	9853759	6860992	5685983	7.70096e+06
1111	margarate (17:0)	Lipid	Long Chain Fatty Acid	1121	LC/MS Neg	891	5731	269.249	506-12-7	10465		HMDB02259	11191934	8574812	7221588	13575836	10402669	8552056	9546352	10238966	13338881	7906583	9095689	7932319	12032169	9950077	7.6501e+06	10223532	9522167	7863397	7274092	11582267	10402350	6784881	10669149	6794088	12911549	6942304	12415583	8267483	9780259	8069677	9780710	8005200	15362076	14258649	10141548	14993392	13300637
1367	margaroylcarnitine*	Lipid	Fatty Acid Metabolism(Acyl Carnitine)	57512	LC/MS Pos Late	100004054	1424	414.358	106182-29-0			HMDB06210	291405	181619	499272	491262	312573	366551	159309		176171	276491		372278	262029	272645	267355	251491	380786	250954	235799	246251	384336	241980	233513	357487		233190	278074	462258	385628	398392	296015	284483	265977	469346	174051	442123	474071
1163	mead acid (20:3n9)	Lipid	Polyunsaturated Fatty Acid (n3 and n6)	35174	LC/MS Neg	100001472	5650	305.249	20590-32-3	5312531		HMDB10378	2362618	2557128	1701237	2746669	2113205	2141624	3188186	2561389	3.02266e+06	1794826	2193034	2117201	4.02788e+06	1.65883e+06	1.38992e+06	1.68707e+06	1732287	2.41868e+06	2189797	3584301	1.53497e+06	2.98754e+06	2044052	2179086	3.96212e+06	2.13668e+06	2.04045e+06	1.61504e+06	2663593	3.18317e+06	1.79735e+06	1.52611e+06	4132168	4926202	3.74917e+06	2986146	2754449
306	methionine	Amino Acid	Methionine, Cysteine, SAM and Taurine Metabolism	1302	LC/MS Neg	415	1147	148.044	63-68-3	6137	C00073	HMDB00696	21869776	13737336	12654939	15543467	12352216	12219847	14477560	11314891	14901975	14036158	10471437	11554219	16502461	13521109	14845111	14821383	10054467	10473998	15054065	12151273	15119850	12398306	12127046	7537491	16615161	14939287	12342368	11738121	10967957	10827455	14733405	14798218	17080212	12912662	18430392	14196727	10104189
310	methionine sulfone	Amino Acid	Methionine, Cysteine, SAM and Taurine Metabolism	44878	LC/MS Pos Early	100004635	1250	182.048	820-10-0	69961			205364	219119	234957	196673	236607	223555	226837	211001	264840	324476	314040	201086	272888	234313	272490	340190	202635	221285	208641	209912	259266	231196	378803	182489	205758	283876	230498	227262	123241	221222	202095	193025	266946	224544	311338	273797	243609
311	methionine sulfoxide	Amino Acid	Methionine, Cysteine, SAM and Taurine Metabolism	18374	LC/MS Pos Early	100000039	1272	166.053	3226-65-1	158980	C02989	HMDB02005	10896241	8480396	6808138	8675452	7851246	7047586	11968509	7283529	9251259	9137597	7315609	6602099	9022371	7663019	8769532	6575235	4694411	4800781	8462713	6788491	9064837	6955941	6825599	3462066	8607093	8737896	7612512	6150390	5579279	5393187	6931697	8074285	13467435	8619101	13212434	8518387	5746524
3892	methyl glucopyranoside (alpha + beta)	Xenobiotics	Food Component/Plant	46144	LC/MS Neg	100005864	1070	193.072					157274	295052	226915	262317	328333	267048	154412	307072	181267	382594	303938	249990	299198	224526	302963	481384	263913	148924	269377	270373	196836	286949	151678	165194	271982	234850	385370	326425	196583	268430	233444	205556	300967	182662	301047	236662	260356
3807	methyl indole-3-acetate	Xenobiotics	Food Component/Plant	1584	LC/MS Pos Early	1104	3339	190.086	1912-33-0	74706		HMDB29738	2620000	5019601	4488452	6429628	6226787	7370809	5639746	6072003	5072034	12450236	6503768	5003470	4508973	6298666	7983918	13668394	4495064	4202767	10939142	9734353	5759774	6301628	8576222	4741759	7072345	16543945	7783258	4025833	4573016	5520339	7452574	6332797	10085689	6545296	10075980	6344726	6167258
1310	methylmalonate (MMA)	Lipid	Fatty Acid Metabolism (also BCAA Metabolism)	1496	LC/MS Polar	418	3078.4	117.019	516-05-2	487	C02170	HMDB00202	1167899	1.47568e+06	1153049	1197083	1259398	972987	1273419	1320740	918404	1104974	1401816	1316950	1489567	1.90267e+06	1107842	1035660	946167	1217812	1.44045e+06	1402296	1373209	1201032	1495587	1627713	882432	979457	1258743	1151471	1035722	1163330	1402238	1014242	1367605	1177449	1050026	1.51522e+06	997484
289	methylsuccinate	Amino Acid	Leucine, Isoleucine and Valine Metabolism	15745	LC/MS Polar	2051	2800	131.035	498-21-5	10349		HMDB01844	504093	834121	591925	475620	477702	535867	572248	751929	589232	446374	846066	568927	515517	784614	505947	504198	426143	461232	704558	756944	842281	481233	882159	800404	328207	951460	484714	1004544	1378968	1165567	690631	619452	2334929	1.30386e+06	1455113	1.21218e+06	1475992
1562	myo-inositol	Lipid	Inositol Metabolism	1124	LC/MS Polar	363	3506.3	225.062	87-89-8	892	C00137	HMDB00211	3327916	2761517	3.79455e+06	3578439	6102365	3984195	3565899	3777999	3568384	3133314	4312450	1661614	4502769	3.77552e+06	4483029	2553097	3347668	4440558	4084428	2640816	4438875	4462383	3139909	2781616	2542855	5434973	3050075	3184357	3402819	3483305	3347622	3345513	3889140	3415020	3.76906e+06	2.04453e+06	4636140
1103	myristate (14:0)	Lipid	Long Chain Fatty Acid	1365	LC/MS Neg	519	5440	227.202	544-63-8	11005	C06424	HMDB00806	69031032	93179160	78816728	111826912	67236704	169840816	121810376	72308544	88558568	62144828	215175664	76192056	159103808	84275872	70193504	234856976	117620520	133574424	96245880	116775992	89606320	72883360	198769152	91786352	139632416	103846672	92305744	70611152	82034304	101403384	110615192	59516540	70277640	139722080	68855472	98199744	231263328
1104	myristoleate (14:1n5)	Lipid	Long Chain Fatty Acid	32418	LC/MS Neg	100001198	5346.9	225.186	544-64-9	5281119	C08322	HMDB02000	9843427	16319685	17867980	21174008	11259601	23343460	12281075	9210202	9386491	7066342	30486854	10269552	26280914	14669234	9684108	47046192	21573468	24704588	19788292	18634400	18729578	11583481	41951384	19609104	23465588	18197744	14769469	11348758	18886400	23372936	22335052	10124337	10456225	21966106	8071750	17142582	50457672
1345	myristoleoylcarnitine (C14:1)*	Lipid	Fatty Acid Metabolism(Acyl Carnitine)	48182	LC/MS Pos Late	100006051	1316	370.295	889848-55-9	90659872			11167889	9088552	17604036	10016806	8411118	10359554	4263508	5782804	6.46579e+06	3614910	6598151	7841217	8784969	8728721	7096468	11098260	11855119	11111336	5969610	6592127	13532397	10251359	8893356	9127227	9816374	10642590	8961360	9455556	10064747	15359569	9449753	8923817	7.97921e+06	12065243	5456682	8172594	19639380
1336	myristoylcarnitine (C14)	Lipid	Fatty Acid Metabolism(Acyl Carnitine)	33952	LC/MS Pos Late	100001270	1350	372.311	18822-89-4	6426854		HMDB05066	7.40964e+06	6871559	16289195	6896915	5945008	10653483	4405098	5364777	5542246	3.84307e+06	6754635	5657687	8.02065e+06	7363794	6284613	9042131	10268028	8441673	6036978	5592744	9462940	8564159	7917425	7416660	6908558	8670541	7.39739e+06	7.53494e+06	7.32564e+06	12290755	7103502	5880890	6044780	9313028	4230585	6882807	17074784
3359	N1-Methyl-2-pyridone-5-carboxamide	Cofactors and Vitamins	Nicotinate and Nicotinamide Metabolism	40469	LC/MS Neg	100001468	1668	151.051	701-44-0	69698	C05842	HMDB04193	2578291	1.77967e+06	2461170	1726738	1.77387e+06	2627042	2040105	2006727	3128516	994754	4.04992e+06	2643274	3028017	2761236	2881353	1144706	1599951	2063115	2243823	2443708	2042613	2618445	935000	2991696	4796798	1.7031e+06	2484299	2322379	1377104	1.94297e+06	3.91496e+06	2242126	1468970	2256610	1408937	1066905	2397217
3257	N2,N2-dimethylguanosine	Nucleotide	Purine Metabolism, Guanine containing	35137	LC/MS Pos Early	100001412	2210	312.13	2140-67-2	92919		HMDB04824	175587	120035	333052	161911	178497	249783	159963	167900	152364	246275	210837	192201	124424	218305	147127	256800	173437	184040	167161	129572	138383	173701	156936	148149	156146	109049	142405	183472	142849	114399	191870	192648	85495	127192			76994
3313	N4-acetylcytidine	Nucleotide	Pyrimidine Metabolism, Cytidine containing	35130	LC/MS Pos Early	100001413	1580	286.103	3768-18-1	107461		HMDB05923	313842	201209	313271	209604	288819	255712	185166	190099	247592	208762	257051	236802	224084	237290	258150	321145	297256	330971	226531	173924	367614	302263	261308	232978	259140	252979	232910	250152	238470	305114	195495	309618	282181	218964	263184	251026	307523
90	N6,N6,N6-trimethyllysine	Amino Acid	Lysine Metabolism	1498	LC/MS Pos Early	189	2825	189.16	23284-33-5	440120	C03793	HMDB01325	60305456	44776388	34932120	62517828	56303068	31227622	41902528	44422956	47790792	35956764	48208196	49230840	78356888	65100496	65759000	53384760	50149504	43880636	97543968	51949512	91452280	69312528	54009904	46964200	62926088	59370052	60779520	43736896	62214968	56613052	81028320	87370352	83846336	52756032	72926776	49043488	51937876
85	N6-acetyllysine	Amino Acid	Lysine Metabolism	36752	LC/MS Neg	100001734	1059	187.109	692-04-6	92832	C02727	HMDB00206	441125	533035	598511	748711	615084	401737	479374	583117	359752	575282	596836	581723	712890	603129	566135	537053	444661	564053	615694	703622	532725	560226	548646	473934	532841	551817	699456	728345	519531	639629	812283	658727	736616	549603	724760	621868	713067
3231	N6-carbamoylthreonyladenosine	Nucleotide	Purine Metabolism, Adenine containing	35157	LC/MS Neg	100001415	2164	411.127	24719-82-2	161466		HMDB41623	38828	46389	100227	76698	106939	52467	36125	76297	52664	75655	98291	75874	99679	99320	113926	52035	64319	110832	89279	57367	91175	60190	44249	63677	88043	65790	61632	104752	91671	68430	88997	84203	100312	99000	103926	41330	68460
1049	N6-carboxymethyllysine	Carbohydrate	Advanced Glycation End-product	36713	LC/MS Pos Early	100001768	2500	205.118	5746-04-03	123800				84298					119103	97556	129424			113077	183465	213113	69116				137991		171860	83344	80783	78515			121672				137809	65467	75813	93159	46933		107157
3240	N6-succinyladenosine	Nucleotide	Purine Metabolism, Adenine containing	48130	LC/MS Neg	100001664	980	382.1	4542-23-8	165243		HMDB00912	14331	19882	83729		59781		14270	31727			65689		106989	213269	29291			39667	46875		40333							20033	54818					85385	29269		44200
66	N-acetyl-1-methylhistidine*	Amino Acid	Histidine Metabolism	43255	LC/MS Pos Early	100004299	2100	212.103		193270			58265	59576	119423	116745	120980	130244	59124	87347	63500		131725	109108	102691	74300		53275	177613	143630	74084	96216		80892	84528	60986		74309	39625	53976	88989	167381	104790	71236		63682	37722	34120	165940
65	N-acetyl-3-methylhistidine*	Amino Acid	Histidine Metabolism	43256	LC/MS Pos Early	100002204	2056	212.103	37841-04-6	193270			377913	258679	265241	329993	378610	330131	436109	470603	324813	205387	399065	379601	529605	402462	195211	287850	516118	522142	386617	474268	386273	337979	342746	473266	363631	254658	364918	305881	342267	501419	376492	303251	273372	354440	174045	380205	639268
30	N-acetylalanine	Amino Acid	Alanine and Aspartate Metabolism	1585	LC/MS Polar	1110	1564.8	130.051	97-69-8	88064	C02847	HMDB00766	2252708	1574521	2236243	2159242	1791830	1575315	2201901	1683253	1965066	1375558	2428695	1941676	2198720	2352735	2064467	1677222	2191919	2010002	2385142	1.89479e+06	2640460	1797671	2307650	1817636	2096295	2226455	2184799	2495308	2287034	2117722	2314044	2022331	2794340	2146437	2309594	2399912	2.46478e+06
357	N-acetylarginine	Amino Acid	Urea cycle; Arginine and Proline Metabolism	33953	LC/MS Pos Early	100001266	2245	217.13	155-84-0	67427	C02562	HMDB04620	1824619	1756024	2.07212e+06	1669568	1690199	1382470	2682014	1626049	1.6558e+06	1795895	1681941	1635581	2154891	1914047	1701137	2.097e+06	1578017	1436331	2573834	2329789	2192663	1683946	1904321	1429380	1611978	1.73498e+06	1.86443e+06	1518327	875999	974991	1.59418e+06	2332104	1.82078e+06	1561575	1963334	1156802	1101596
39	N-acetylasparagine	Amino Acid	Alanine and Aspartate Metabolism	33942	LC/MS Polar	100001257	2250	173.057	4033-40-3	99715		HMDB06028	40303	678577	205362	108915	79989	289301	63127	89448	49984	293232	127917	132176	41386	143636	98166	645777	55356	112060	79072	257295	64278	242774	128074	255245	33974	102083	118649	156446	62475	141815	105952	73141	82120	366840	119525	126456	939315
35	N-acetylaspartate (NAA)	Amino Acid	Alanine and Aspartate Metabolism	22185	LC/MS Polar	100000787	3143	174.041	997-55-7;997-55-7	65065	C01042	HMDB00812	4724117	6326435	6522252	5629821	4516161	4716550	5633816	6637979	3929452	4849328	5225745	5524723	5403166	5677188	4468165	5627560	3318061	4465176	5002131	4999461	5923359	4650162	4616117	7528313	3270682	5397138	5184105	6004873	3844118	4432038	5761257	5449410	4550293	5165281	4515003	5264321	3495090
50	N-acetyl-aspartyl-glutamate (NAAG)	Amino Acid	Glutamate Metabolism	35665	LC/MS Pos Early	100001612	1035	305.098	3106-85-2	5255	C12270	HMDB01067		54336		73148	75704		67740						87718	134935	70588	87559	89810	63167	77200		168560	108500		87201		96808	100462	102498		106718	99479	54301	103152	87098	113607	102706
3301	N-acetyl-beta-alanine	Nucleotide	Pyrimidine Metabolism, Uracil containing	37432	LC/MS Neg	100002102	773	130.051	3025-95-4	76406	C01073		388088		384451	313677		253165	217166	227815	226375	338919	281830	403146	339671	309959	215562	304772	246068	300077	249374	261978	253189	210977	219187	221277	346875	424512	417906	223873	389662	342304	486476	448575	395664	277713	266363	272832	426636
358	N-acetylcitrulline	Amino Acid	Urea cycle; Arginine and Proline Metabolism	48434	LC/MS Neg	100001577	940	216.099	33965-42-3	656979	C15532	HMDB00856	228821	269974	307484	285253	298992	198812	319406	238572	219880	291173	310354	238043	693312	348621	356760	330139	230902	267380	610168	434725	562450	322936	372062	217280	446405	336849	464056	356847	181913	231397	545861	360259	542299	386626	624039	243395	245393
1048	N-acetylglucosamine/N-acetylgalactosamine	Carbohydrate	Aminosugar Metabolism	46539	LC/MS Pos Early	100006435	715	222.097		24139		HMDB00215	234721		364451		289848	107363		120884						290654	176905	109560	119635		294670		311137	101611	133194		129493	351403	209335	133055	108895			242959		150608	163589		248014
1045	N-acetylglucosaminylasparagine	Carbohydrate	Aminosugar Metabolism	48149	LC/MS Pos Early	1215	1212	336.14	2776-93-4	123826	C04540	HMDB00489	226655	229311	275755	169351	203054	164707	233625	246122	187890	371554	170850	138539	220402	256301	224735	273450	97519	212301	165982	204231	259218	201371	222876	186919	189305	327068	185344	269300	140852	258725	249406	198757	197530	218157	281623	175234	193192
42	N-acetylglutamate	Amino Acid	Glutamate Metabolism	15720	LC/MS Polar	100000282	3106	188.056	5817-08-03	70914	C00624	HMDB01138	386497	601132	504776	443837	438390	369961	740978	543283	414590	446746	804769	462733	661502	629447	400370	354923	406427	428740	659161	564663	642842	373168	563190	510585	402825	325859	664572	582710	293292	315413	437409	390099	465337	374464	694043	308612	281729
43	N-acetylglutamine	Amino Acid	Glutamate Metabolism	33943	LC/MS Polar	100001253	2140	187.072	2490-97-3	182230	C02716	HMDB06029	1307443	678388	631994	462074	934735	887319	728397	495921	1274572	676728	1016088	629394	1577273	917199	793466	339380	1.97789e+06	1250402	1176768	418157	1925968	1161812	1166080	667470	1194444	1046961	719006	667024	1294600	815552	1277518	982256	1243084	855026	770670	468009	1469369
2	N-acetylglycine	Amino Acid	Glycine, Serine and Threonine Metabolism	27710	LC/MS Pos Early	100001006	826	118.05	543-24-8	10972		HMDB00532	3013865	2423942	1993200	2380224	2795203	2271642	1487980	2.05344e+06	2.85465e+06	1366188	2383621	2797799	2723184	3089215	2019236	2110201	2.93456e+06	3143931	2775522	2495790	4615667	2053111	3575791	2947167	3033195	1.58896e+06	2582794	2734435	3215385	3.03291e+06	2411275	2190740	2260086	4249972	2129506	2232367	4450133
64	N-acetylhistidine	Amino Acid	Histidine Metabolism	33946	LC/MS Neg	100001293	900	196.073	39145-52-3	75619	C02997	HMDB32055	1.04783e+06	723658	674043	982716	1.03455e+06	711226	1132624	907639	794252	738145	1125960	977490	2215687	917636	771664	467363	1094052	835842	1221266	1138123	1038392	680867	765862	476918	1291484	608270	995931	883571	835275	679341	1623049	754273	1216261	990169	1202797	815562	1055557
277	N-acetylisoleucine	Amino Acid	Leucine, Isoleucine and Valine Metabolism	33967	LC/MS Neg	100001276	2325	172.098	3077-46-1	2802421		HMDB61684	606694	433919	501458	472105	628830	402653	529594	553809	663433	494588	663508	482230	834370	565981	568872	503499	695366	619208	885148	692475	675934	480229	641177	319360	584943	251724	587025	492878	290665	377395	589719	502079	436010	405133	464196	387870	543393
207	N-acetylkynurenine (2)	Amino Acid	Tryptophan Metabolism	48757	LC/MS Neg	100006378	2378	249.088					326208	587181	1097012	480957	747126	664210	464181	594026	443275	545130	694917	603659	1114128	1057869	1091113	726003	761967	642061	688816	835315	1036094	697547	525582	922255	568275	1627353	860635	1056970	949887	1401448	616181	802472	2023493	1638160	1227241	1729400	2316616
242	N-acetylleucine	Amino Acid	Leucine, Isoleucine and Valine Metabolism	1587	LC/MS Neg	1082	2400	172.098	1188-21-2	70912	C02710	HMDB11756	2856489	3308387	3290488	2906448	4465951	3195873	3263570	3989190	3179419	3673914	5342736	2939429	7.34228e+06	4346422	4818379	3758241	5562914	4703418	8461375	5058237	4979273	4223592	5066424	3.54091e+06	5092754	3046147	4066120	3639105	2679190	3139313	3.80822e+06	3.51865e+06	4181988	2333513	3028186	2818563	3904084
307	N-acetylmethionine	Amino Acid	Methionine, Cysteine, SAM and Taurine Metabolism	1589	LC/MS Neg	1083	1787	190.054	65-82-7	448580	C02712	HMDB11745	4344833	3029743	3806715	4153636	3211953	2513607	3246437	2884731	3838497	2993682	3085767	2920905	6.4821e+06	4274063	4701981	2956434	2922649	3.19058e+06	5809829	3.82678e+06	4483346	3185475	3257531	2525908	4942988	3866951	3590835	3.20621e+06	2705991	2707319	4890548	3612905	4316395	2356060	4356186	3101493	2955905
1034	N-acetylneuraminate	Carbohydrate	Aminosugar Metabolism	32377	LC/MS Polar	1162	3072.6	308.099	131-48-6	439197	C00270	HMDB00230	146512	64048	121459	110339	116543	82472	106241	104110	105905	86884	95594	117135	183191	130910	78878	74906	109908	73692	109299	77538	159431		101321		97459	120295	87834	125677	138751	107125		86267	169363	126439	150971	129030	151653
110	N-acetylphenylalanine	Amino Acid	Phenylalanine Metabolism	33950	LC/MS Neg	100001256	2597	206.082	2018-61-3	74839	C03519	HMDB00512	3122216	3547437	4739351	3078014	5395450	4411571	3100079	3761781	2856842	8190723	4683409	3271743	7379389	5037670	4847045	7316883	4415655	5048144	6150637	4803272	5192389	3765342	5390210	3597806	4729058	7398726	4829607	3175141	3180703	3682176	5159879	4341356	4257410	2216320	3065499	3147327	3978891
391	N-acetylputrescine	Amino Acid	Polyamine Metabolism	37496	LC/MS Pos Early	192	2230	131.118	18233-70-0	122356	C02714	HMDB02064	411144	343328	349537	250292	188545	391422	424102	368673	280196	365056	287538	192171	339071	518967	349684	206152	165287	210336	252966	131028	372038	226311	134631	343544	399339	667660	404867	564282	165813	399850	420510	319878	591459	563467	589372	407582	463745
10	N-acetylserine	Amino Acid	Glycine, Serine and Threonine Metabolism	37076	LC/MS Polar	100001851	2000	146.046	97-14-3	65249		HMDB02931	2234935	1652819	2500980	1923553	1725234	1.62085e+06	2149834	1472130	2053119	1567025	1.89724e+06	1739729	1937965	2070011	1925954	1.68086e+06	2094413	1735071	2488939	1801923	2046757	1.35915e+06	1890458	1531287	1.49633e+06	2444596	2.04636e+06	2138977	1910979	1788077	2402406	1934704	2855286	2071377	2703563	2404205	1937669
336	N-acetyltaurine	Amino Acid	Methionine, Cysteine, SAM and Taurine Metabolism	48187	LC/MS Neg	100005466	800	166.018		159864			2363750	2489157	2138848	2537601	2885571	1677643	2055867	3305517	2217000	1.34692e+06	3357444	3293491	6.41766e+06	4020500	4246341	1501612	2530034	2.73126e+06	3442380	2992436	4186314	2.8147e+06	4.10558e+06	2902791	3849928	1483142	2614630	2901530	2965051	2890949	3045877	2553558	4334075	3549006	3145848	2666169	4663906
17	N-acetylthreonine	Amino Acid	Glycine, Serine and Threonine Metabolism	33939	LC/MS Neg	100001274	821.6	160.062	17093-74-2	152204			642536	1127404	884334	1419100	1017535	789299	610744	856178	492158	799343	1372548	965109	1145083	1197277	997259	955935	1086933	1054346	1730149	1258829	1166484	1067796	802007	607161	1215960	1077485	1334884	991665	737151	648837	1117252	848353	824383	796053	1223578	1176478	1078392
195	N-acetyltryptophan	Amino Acid	Tryptophan Metabolism	33959	LC/MS Pos Early	100001254	2640	247.108	1218-34-4	700653	C03137	HMDB13713	8.37172e+06	9752042	25033464	6.66029e+06	7419133	10981881	9157741	7.80685e+06	9501207	11656127	6.77802e+06	6.82719e+06	13874511	14569170	10259606	19096102	9004957	9549380	13063979	10909041	10591921	8843441	13404807	9411914	9343988	17288484	6780360	7310047	4318802	7841782	8845482	10752103	6.65658e+06	7263315	5863187	5516785	10113748
124	N-acetyltyrosine	Amino Acid	Tyrosine Metabolism	32390	LC/MS Neg	100001104	1680	222.077	537-55-3	68310		HMDB00866	824613	857178	2446742	839839	928359	1341322	699147	830289	542359	2154900	665918	550428	1761147	1052453	1317290	2048654	1074753	1122266	1475342	1198813	1262603	718476	1096888	446870	1249108	2244767	964740	410470	248551	474303	1522632	1139534	1167215	423695	757351	383541	519775
296	N-acetylvaline	Amino Acid	Leucine, Isoleucine and Valine Metabolism	1591	LC/MS Neg	1084	1704	158.082	96-81-1	66789		HMDB11757	115437	138841	117912	112526	179464	109665	108032	149985	134515	133906	216172	149618	207850	158140	209316	161313	215370	209175	253609	169847	214629	172852	238372	113238	168918	115854	158940	122625	159415	143963	185244	140217	175054	124134	101371	158758	232185
360	N-delta-acetylornithine	Amino Acid	Urea cycle; Arginine and Proline Metabolism	43249	LC/MS Neg	100004523	858	173.093		9920500			1128818	1.57662e+06	1177850	1628688	1.7506e+06	1334303	1129787	1813974	1265753	1.77339e+06	1.92644e+06	1.8213e+06	1904641	1556846	1371925	1444360	1441562	1584643	1.75697e+06	1939167	1559628	1578303	1.84465e+06	1066892	1.73439e+06	1288676	1.76446e+06	1499803	1310460	1465073	1204564	1522955	2154058	1.67522e+06	1742685	1.69452e+06	1742574
1137	nervonate (24:1n9)*	Lipid	Long Chain Fatty Acid	52674	LC/MS Neg	100001231	6804	365.342	506-37-6	5281120	C08323	HMDB02368		1058028	830270	1373216	67169	197163	867035	804773		546913	763979	1163038		509478	1106604	1194080		1192878	1116529	720215	1295259	854000	859201	710941	1660567	1084274	1848419	1.78577e+06		1349598	1175504	853933	1599729	284828	2316564	1376626	108421
1368	nervonoylcarnitine (C24:1)*	Lipid	Fatty Acid Metabolism(Acyl Carnitine)	57531	LC/MS Pos Late	100015846	1602	510.452					227977	132339	186526	227764	186133			129263	107739		98851	212395	176851	178019	152370	89676	133928	157013		99878	188070		91188	113979	155735	233270	186194	142657		180365	189492	194475	236925	202725		197146	192666
211	N-formylanthranilic acid	Amino Acid	Tryptophan Metabolism	43549	LC/MS Polar	100004561	900	164.035	3342-77-6	101399	C05653	HMDB04089	1162304	797467	1956744	1098398	706141	680918	1282413	956982	1114970	2133784	674222	503095	1208870	1179332	836769	1163127	491430	727570	1097685	1348905	1002274	822825	665490	700030	914640	2.09529e+06	805286	758126	393182	914432	1198615	1.03434e+06	647432	595274	612332	559487	715359
308	N-formylmethionine	Amino Acid	Methionine, Cysteine, SAM and Taurine Metabolism	2829	LC/MS Neg	194	1543.8	176.039	4289-98-9	439750	C03145	HMDB01015	695253	809365	834306	758193	764623	558815	697806	803374	558434	744351	824111	836613	1075386	1097530	839330	719621	1.02918e+06	932417	1198158	1057887	1058128	930246	921778	694522	1036118	803579	1125730	883429	924079	797584	1053748	1096922	1.02545e+06	895897	1036943	725624	911722
3814	N-glycolylneuraminate	Xenobiotics	Food Component/Plant	37123	LC/MS Polar	100001491	3327.5	324.094	1113-83-3	123802	C03410	HMDB00833	67285			32493	60088		47138	79736	52091		71710		121064	53184			62296	63111	50797		67306	74875	28076	62218		90742		90454	122596		71968	40959	151495	90076	152548	200999	185342
3340	nicotinamide	Cofactors and Vitamins	Nicotinate and Nicotinamide Metabolism	594	LC/MS Pos Early	432	1942	123.055	98-92-0	936	C00153	HMDB01406	25352360	15177098	13679439	19347754	18896228	22932144	17551496	18704636	32593392	17218348	33560252	29306112	24464052	28202916	21645904	12306284	16451511	18224546	19742006	17061312	25781238	24141908	11967105	33966180	27473938	22579924	25722404	23728480	29547938	26241672	27379086	15453694	18060444	27909108	24617170	25627638	28320474
3351	nicotinamide N-oxide	Cofactors and Vitamins	Nicotinate and Nicotinamide Metabolism	39582	LC/MS Pos Early	100002763	877	139.05	1986-81-8	72661		HMDB02730	1559816	671134	253858	698082	474294	448756	610257	339767	1424625		815901	954922	916190	765092	781207		453901	392856	664370	655429	928535	610829		855278	1245061		932544	721669	295626	449045	1581650	833044	257308	669099	262622		487968
3343	nicotinamide riboside	Cofactors and Vitamins	Nicotinate and Nicotinamide Metabolism	33013	LC/MS Pos Early	100001310	2040	255.098	1341-23-7	439924	C03150	HMDB00855	194126	341028	491669		239844	219978	132419	225387			274793	165954		333093	285858	342514	220567	264953	421854	137480	355114	214706	338138	229783		301635		173165	99899	192043		328708	169225				170798
3338	nicotinate ribonucleoside	Cofactors and Vitamins	Nicotinate and Nicotinamide Metabolism	33471	LC/MS Pos Early	100001316	1536	256.082	2625-49-2	161234	C05841	HMDB06809	2417920	1911099	4779171	1364306	1.5791e+06	4352682	3263398	1730593	5954513	3534980	5232167	1902451	1981782	2684759	3591462	3342607	1119130	1101097	3.08242e+06	3680288	1834377	1489918	1167671	2062022	3393917	5.99601e+06	2682343	1127841	760113	1107032	3416286	2579266	1496955	1.73782e+06	1.93706e+06	667959	1007632
4486	N-methylpipecolate	Xenobiotics	Chemical	47101	LC/MS Pos Early	100005383	1932	144.102	41447-17-0	11286529			1329021	1.02845e+06	1.59741e+06	1095195	1466083	1279374	1324926	1254227	1308651	1158343	1291531	1266580	1032113	1.61386e+06	1191680	938943	1182366	1142756	920669	1155915	1129054	996472	1.03929e+06	1207682	880969	1228097	1190389	1417722	1175717	1047860	1021284	913379	1085677	1494519	1217043	1352250	1133024
369	N-methylproline	Amino Acid	Urea cycle; Arginine and Proline Metabolism	37431	LC/MS Pos Early	100001956	1335	130.086	475-11-6	557			3663437	4139592	5775925	4072478	3.67497e+06	3951600	4.12671e+06	3926903	3879097	5535951	3793818	3923659	5157067	3816615	3929896	5625939	6.43308e+06	3868558	6589197	4994002	4551898	5585176	6583371	3789780	3694180	3489487	5069019	6284998	3.58644e+06	4.76981e+06	6230852	4436331	4620900	5559020	6413977	4979726	6176149
371	N-monomethylarginine	Amino Acid	Urea cycle; Arginine and Proline Metabolism	43586	LC/MS Pos Early	100004488	2845	189.135	53308-83-1	132862	C03884	HMDB29416	1.28041e+06	1061265	825780		923060	944011	854004	313729	1.03787e+06	931750	1118216	744462	1520934	848252	840369	673026	892098	1007147	940066	565460	1486182	1.09453e+06	807624	615473	1287220	1306481	977662	695455	816342	716169	876209	1102391	1225347	769222	1123850	634805	620244
1319	N-octanoylglycine	Lipid	Fatty Acid Metabolism(Acyl Glycine)	43502	LC/MS Neg	100003940	4335.4	200.129	14246-53-8	84290		HMDB00832	156583	217672	591799	392756	236112	190633	119291	185405	142615	200896	327672	347307	252990	432304	233407	225469	274685	286723	233363	264262	443672	186652	359007	362233	221616	212256	516682	469786	415919	316719	382795	197439	262517	518108	223367	265032	611431
1544	N-oleoyltaurine	Lipid	Endocannabinoid	39732	LC/MS Neg	100003119	5610	388.253	52514-04-2	6437033			151800	109689	138169	96850	87344			57838	91423	104293	83085	109910		153810	68225	127066		167325	70081		174696	105802	76841	139861	122188	176456	92576	143219	209220	154654	104176	77797	95623	212434	59203	92294	118563
1122	nonadecanoate (19:0)	Lipid	Long Chain Fatty Acid	1356	LC/MS Neg	892	6068	297.28	646-30-0	12591	C16535	HMDB00772	2327737	2204179	1726890	3230661	2832034	2270496	2.03869e+06	2413684	2763929	2649000	1.9705e+06	2198966	2693144	2222383	2126966	2783956	2.05795e+06	1852462	1956165	2423909	2129867	1553838	2295411	1656116	3439829	1834054	1.91508e+06	1781149	2484937	1.86881e+06	2125947	1855948	2989550	3.93845e+06	2305558	2847126	3257668
1320	N-palmitoylglycine	Lipid	Fatty Acid Metabolism(Acyl Glycine)	42092	LC/MS Neg	100003686	5580	312.254	2441-41-0	151008		HMDB13034	69904		95006	73102	58973	71770	78455	64797	68871	89970	103557	89794	80032	92846		74138		83760		65730	85854	59554	69523	67624	90968	49869	53598	72940		50245	64660	52493		88097	71825		60865
2243	N-palmitoyl-sphinganine (d18:0/16:0)	Lipid	Sphingolipid Metabolism	52604	LC/MS Pos Late	100009028	3090	540.535	5966-29-0	5283572		HMDB11760	437488	564652	259020	490127	512524	547350	774804	573473	810357	1230273	932886	344924	579671	359024	599586	649417	162692	118489	605301	564224	592334	366926	615568	198235	724028	839825	819586	518093	449290	484915	159172	298802	1495087	726707	1236893	1608420	665572
2281	N-palmitoyl-sphingosine (d18:1/16:0)	Lipid	Sphingolipid Metabolism	44877	LC/MS Pos Late	1518	2893	538.519	24696-26-2	5283564		HMDB04949	1.03216e+06	840650	669861	983098	773227	905121	1083556	918917	1021944	727104	922263	855673	1280835	1140216	648690	473244	589041	653920	649431	843189	1.04211e+06	1019113	527935	536635	937840	886294	697831	823597	1724331	1739259	547704	648653	1582751	1492736	1226914	2201161	2.07905e+06
1546	N-palmitoyltaurine	Lipid	Endocannabinoid	39835	LC/MS Neg	100003239	5560	362.237	83982-06-3				89136	73962	186184	115222		123623		101395	183624	111944	98641	78287	107538	115138			97811	112871	63760		79077	116177	78614	67174		78971		98069	95948	87859	93234		67116	146500		114688	114573
2283	N-stearoyl-sphingosine (d18:1/18:0)*	Lipid	Sphingolipid Metabolism	54979	LC/MS Pos Late	1547	3392	566.551	104404-17-3	5283565		HMDB04950	181669	132330	106535	231150	109828		113630	124863	60780		81558	239716	101281	173214	99447			141530		140328	389354	216702	143827	232910	221543			391949	641172	593501	112951	77741	303326	483939	219300	563227	396954
2330	N-tetracosadienoyl-sphingosine (d18:1/24:2)*	Lipid	Sphingolipid Metabolism	57441	LC/MS Pos Late	100015702	3858	646.613					735446	741581	731288	1008273	606712	869571	853989	706124	622380	412948	682497	854936	797376	800125	752363	301724	683243	701969	480032	674543	845592	1030640	487366	823382	895528	923670	958311	1188484	1.25641e+06	1715713	453671	743128	1091076	1449555	1505846	1366354	1.24448e+06
108	N-trimethyl 5-aminovalerate	Amino Acid	Lysine Metabolism	57687	LC/MS Pos Early	100015962	2186	160.133					333991232	294870944	355936736	487173952	416812672	324265952	284708128	355291968	390280640	339396672	469429024	399365472	486880960	427624384	390606624	307785376	395981248	315799328	353307776	518897344	458349120	395912032	311289536	287255808	375346688	254367632	453960224	426809664	462516000	393511680	328717472	468057536	342442144	480385984	447994848	334803840	450051392
3526	o-cresol sulfate	Xenobiotics	Benzoate Metabolism	36845	LC/MS Neg	100001806	2796	187.007		11615528				43791	112260	147032	188479	121502	57276	151150	134482	168779	100680	128301	22531	43572	69619	129839	125947	214433	22265	71924	92571	75536	95870	97436			68750	98442	86588	99022		28058	50757	62594	85490	105679	108033
1254	octadecanedioate	Lipid	Fatty Acid, Dicarboxylate	36754	LC/MS Neg	100001615	5043	313.238	871-70-5	70095		HMDB00782	441731	346203	623425	316272	467516	454204	337935	381685	450295	358789	357562	359980	390911	416930	333948	369419	424591	339428	286772	277417	423814	393346	369551	459781	285538	410510	368348	409959	373090	488129	363525	249074	337440	403117	266150	349780	557840
1330	octanoylcarnitine (C8)	Lipid	Fatty Acid Metabolism(Acyl Carnitine)	33936	LC/MS Pos Late	100001247	950	288.217	3671-77-0	123701	C02838	HMDB00791	2019213	2095022	4505003	2225989	2290836	2952735	1850333	1449222	2116139	2507035	2491041	1.62819e+06	1808828	2547944	1886919	3421221	2774705	2584590	2073928	2177259	3417949	1864946	2994871	1957498	2515089	2986364	2351219	2.06377e+06	3.02521e+06	3.0083e+06	2256773	2019526	2075114	4.01102e+06	1870627	2185877	5.52939e+06
1115	oleate/vaccenate (18:1)	Lipid	Long Chain Fatty Acid	52285	LC/MS Neg	100008930	5655	281.249					601031680	731832768	291784992	927420032	515347392	640542336	573246912	433951264	553542784	308959488	717416128	542046080	1010077568	575065792	410459072	637588608	626468800	720335104	531784064	636179392	591674816	460114016	877088960	525300416	942949824	436941056	575167808	401278016	671168000	728360832	581141440	353886080	770602560	1254493568	769404928	989550848	1513180800
1533	oleoyl ethanolamide	Lipid	Endocannabinoid	38102	LC/MS Neg	1137	6450	324.291	11-58-0;111-58-0	5283454		HMDB02088	517559	432719	714744	662985	481746	498537	549400	590734	537945	501302	613286	773008	580176	719905	509744	546178	447634	732159	552806	520399	388215	517195	486172	427271	505589	390549	442292	508049	558663	487030	494902	348449	439928	720974	482686	574677	408083
2211	oleoyl-arachidonoyl-glycerol (18:1/20:4) [2]*	Lipid	Diacylglycerol	54961	LC/MS Pos Late	100010937	2990	660.556				HMDB07228	1.03993e+06	867882	1301320	828851	798958	708894	995353	806134	642329	833569	801012	721717	986823	770723	578812	445796	390811	670092	627368	801049	630447	866840	558047	669865	1407047	975055	788536	868268	1194575	1579133	526314	672349	2144068	1.77756e+06	2170700	1450524	991138
1343	oleoylcarnitine (C18:1)	Lipid	Fatty Acid Metabolism(Acyl Carnitine)	35160	LC/MS Pos Late	100001501	1423	426.358	38677-66-6	6441392		HMDB05065	26485258	22404916	35457984	32457632	19522240	18026720	12245026	16352050	18141872	10297536	14396136	26690490	23135632	22781484	17081548	16206706	32497202	26512028	15201441	15744883	33288330	25518814	17906180	23824222	22487312	22313648	21529458	26931706	35027280	31596728	22129680	21786772	23666844	36279528	15326910	27930140	46825856
2197	oleoyl-linoleoyl-glycerol (18:1/18:2) [1]	Lipid	Diacylglycerol	46798	LC/MS Pos Late	100002989	3115	636.556	106292-55-1			HMDB07219	287426	205971					223809		94862	94554			345685						129268	223429					252385		202372	176033		186400	104442	152203	211204	285773	187246	77612
2198	oleoyl-linoleoyl-glycerol (18:1/18:2) [2]	Lipid	Diacylglycerol	46799	LC/MS Pos Late	100002990	3223	636.556	104346-53-4			HMDB07219	4946153	4436325	1652940	2758202	4264133	2722906	5044966	3750404	2923023	2449709	2876088	3039750	6.81904e+06	3565910	2885539	1636076	1801723	2404056	2883794	4774029	2.08164e+06	3032655	2216393	2.93454e+06	4915002	1751217	3.4994e+06	3284951	2369046	4165330	2458655	2668168	5073306	5152725	4617564	3069039	1.97592e+06
3484	O-methylcatechol sulfate	Xenobiotics	Benzoate Metabolism	46111	LC/MS Neg	100004208	2344	203.002		22473		HMDB60013	89861	127651	395486	178886	205546	244736	137629	307650	213149	578801	180000	142824	121227	225605	230812	260170	128971	126220	124367	176216	227482	124821	177027	114698	138299	335445	236678	166942	77138	82894	85735	102341	183706	141369	277904	167856	154122
414	ophthalmate	Amino Acid	Glutathione Metabolism	34592	LC/MS Neg	100001311	919	288.12	495-27-2	7018721		HMDB05765	102773	93261	476506	409727	174706	184837	189008	162321	137866	246018	172697	292513	263958	298502	230681	125345	618178	158734	230891	229036	514066	185672	343838	173030	202875	435191	633695	482260	420786	196736	305100	246371	300201	373023	446843	245127	268808
346	ornithine	Amino Acid	Urea cycle; Arginine and Proline Metabolism	1493	LC/MS Pos Early	444	2800	133.097	3184-13-2	6262	C00077	HMDB03374	114836528	80197504	88265264	99490864	95490056	89129928	92255632	70756112	79391920	124989768	69026960	82771488	86342320	67820680	77266512	95051608	68396520	67175552	77891376	82822616	87915552	75622480	54765268	55339616	71783848	109833432	72932528	73398336	77002496	91825224	66419236	79399528	96870176	72778424	131675152	90184640	90851824
3269	orotate	Nucleotide	Pyrimidine Metabolism, Orotate containing	1505	LC/MS Polar	445	1638.1	155.01	50887-69-9	967	C00295	HMDB00226	2543023	2894356	3138459	2408393	1772729	1921089	3194050	2063875	1714709	2382781	1988585	1931029	2636338	2702573	2076273	2418804	1626983	2059818	3332356	2711321	2920074	2108881	2238725	1840500	3033601	5004243	3069983	2958576	2707527	2960349	3346388	2536078	4657176	3139915	4366394	4028574	3404458
3271	orotidine	Nucleotide	Pyrimidine Metabolism, Orotate containing	35172	LC/MS Polar	100001416	2250	287.052	314-50-1	92751		HMDB00788	458858	395043	500915	402688	378922	329709	385597	425848	395265	372943	475137	460280	554937	511408	478427	303071	368088	426678	532765	327939	555219	452503	393728	423797	437707	652340	520527	551060	718262	556712	538360	460447	845224	716771	691963	664818	710399
4377	O-sulfo-L-tyrosine	Xenobiotics	Chemical	45413	LC/MS Neg	100005384	990	260.023		514186			77817	87707	175237	149258	99469	70231	97336	89062	71854	81000	95098	116094	204383	110816	99827	61244	77909	119645	124725	161826	137357	82834	94805	62816	122927	102592	149055	115786	110481	83784	117232	118065	194042	90459	173452	102399	113004
1108	palmitate (16:0)	Lipid	Long Chain Fatty Acid	1336	LC/MS Neg	424	5618	255.233	57-10-3	985	C00249	HMDB00220	927476352	1095939200	663682816	1358063744	1040045632	1306582144	1272774272	922546240	1267403008	724485184	1367898752	907169600	1578745344	1097769728	852427648	1157046656	1088210816	1224387584	886986304	1064906048	1195023488	823137856	1505015808	921020800	1521426560	817998144	935888832	733657216	1180043904	1096407936	992647360	680363072	1222259200	1804826624	1137414016	1419330816	2145553024
1109	palmitoleate (16:1n7)	Lipid	Long Chain Fatty Acid	33447	LC/MS Neg	452	5475	253.217	373-49-9	445638	C08362	HMDB03229	105524152	205800784	98755096	193127232	115049128	236980528	154905216	107476752	81489120	62017368	329987136	134837392	327604832	161408656	89785280	417315520	201247888	280010304	147705680	185999200	183281200	163899664	432613440	222981648	216858320	138021296	155748368	88047168	185569584	216496976	162147584	84596688	143329616	268420608	137595104	191309408	686138560
1339	palmitoleoylcarnitine (C16:1)*	Lipid	Fatty Acid Metabolism(Acyl Carnitine)	53223	LC/MS Pos Late	100009406	1357	398.326		71464547			5500310	5653434	9702059	5131478	3868782	6421023	2767684	3376401	2989256	2133004	5344331	5157753	6.4869e+06	5499569	3925462	7804668	8084902	7878411	4271379	4123715	7672858	8455736	6905189	7145008	4975442	6.45391e+06	5203253	5021681	6721593	11917677	5462949	4.10471e+06	4414723	6739136	2563582	5533148	16627026
2184	palmitoleoyl-linoleoyl-glycerol (16:1/18:2) [1]*	Lipid	Diacylglycerol	54967	LC/MS Pos Late	100010930	2664	608.525				HMDB07132	266944	378796		93667	247734	137565	375105	268964			231364	125758	552263	206563		198321		196239	213534	366546		149229	211274	483120	366185		181787	196656	194146	506174			330007	174995	221011	213658	428162
2254	palmitoyl dihydrosphingomyelin (d18:0/16:0)*	Lipid	Sphingolipid Metabolism	52434	LC/MS Pos Late	100008954	2290	705.591		9939965			8554304	6844212	7125252	8544501	8566660	8990676	8703843	6851446	9142996	8599779	10230468	8945883	9271069	7366511	7547516	9247505	7722001	7701431	7450671	6905029	6595232	9286973	11067321	6124206	7006992	8575142	7457595	8330738	9177732	9041550	7068317	7603387	11039819	9243292	8617747	15793200	13433772
1536	palmitoyl ethanolamide	Lipid	Endocannabinoid	38165	LC/MS Neg	1489	6300	298.275	544-31-0	4671	C16512	HMDB02100	713905	600837	882875	900367	893391	744064	892961	771559	865179	906758	812964	890516	775362	900801	851592	766668	539689	844329	754134	780886	694690	621795	630517	626992	637696	643480	729023	786993	710934	685997	632327	587173	753462	964448	765807	902760	597243
2256	palmitoyl sphingomyelin (d18:1/16:0)	Lipid	Sphingolipid Metabolism	37506	LC/MS Pos Late	100002107	2168	703.575	6254-89-3	9939941			115078000	93881800	101189400	129619752	109408776	109213336	106698096	98001984	119758512	95088896	117955288	118459040	112964232	101277768	110285344	107644088	112002800	101904456	103452304	98180152	112631848	113259320	123216744	102947408	99486568	121837912	100305840	109277872	144817984	134508384	105361008	110333224	150717600	133290232	123437640	177503152	166566304
2187	palmitoyl-arachidonoyl-glycerol (16:0/20:4) [2]*	Lipid	Diacylglycerol	54958	LC/MS Pos Late	100010925	3015	634.541				HMDB07112																														122029			285954		90484
1338	palmitoylcarnitine (C16)	Lipid	Fatty Acid Metabolism(Acyl Carnitine)	44681	LC/MS Pos Late	100000776	1425	400.342	6865-14-1	461	C02990	HMDB00222	20812436	14780536	35371560	27257668	21103092	24076936	15215061	17656856	20709544	14019967	18257488	22707514	23797288	24895636	19279182	18215792	30201734	24721550	15873457	16651652	26705264	23815622	18444012	18591744	17758624	22122818	20150708	23839006	30332332	29764156	19012714	21631488	19285226	29254142	16791492	25334376	40771188
2179	palmitoyl-linoleoyl-glycerol (16:0/18:2) [1]*	Lipid	Diacylglycerol	52633	LC/MS Pos Late	100009052	3080	610.541		9543695		HMDB07103
2180	palmitoyl-linoleoyl-glycerol (16:0/18:2) [2]*	Lipid	Diacylglycerol	52634	LC/MS Pos Late	100009055	3197	610.541				HMDB07103	717755	735663	347332	565163	695058	535099	1011409	776664	579126	455730	672612	478084	971660	665731	603101	467381	310905	405426	452630	1136239	332118	560967	414501	332133	817564	320381	620325	592877	366604	812810	543252	361795	1.36389e+06	1011472	1223942	853146	556089
3366	pantothenate	Cofactors and Vitamins	Pantothenate and CoA Metabolism	1508	LC/MS Pos Early	1024	1667	220.118	137-08-6	6613	C00864	HMDB00210	59333548	69064800	62728280	60314276	70138376	63903876	71661168	68226672	71713776	77711864	71355480	70845776	78563760	71237696	71198928	95685072	61698656	75011976	80407840	62526012	66030088	77555952	90038712	64474672	64241432	80485304	70071840	75867480	65537680	74238328	79872392	73046152	80599600	65601212	77125480	72363664	77336320
3519	p-cresol sulfate	Xenobiotics	Benzoate Metabolism	36103	LC/MS Neg	100001315	2890	187.007	3233-57-7	4615423		HMDB11635	6980320	6253664	3779979	8999593	3080077	3917156	2847190	8126924	777619	3492877	975580	11030920	2479828	5477283	1177687	9685371	7610952	8711239	3828564	19634372	9426979	4189845	5581672	2838893	2065790	2289117	11076081	2135740	2617707	6733294	5308828	15029537	4210901	1907993	10416638	5774337	1757931
172	p-cresol-glucuronide*	Amino Acid	Tyrosine Metabolism	48841	LC/MS Neg	100006191	2420	283.082	17680-99-8	154035		HMDB11686	231924	184961	279337	301687	143719	232010	86388	603177	21431	336435	36061	977206	212266	418405	58437	693346	340763	511932	61479	1151643	688618	211945	261065	91763	62377	146693	1232064	68079	64444	445211	270059	902158	90458	95455	468799	211245	53789
1107	pentadecanoate (15:0)	Lipid	Long Chain Fatty Acid	1361	LC/MS Neg	980	5521	241.217	1002-84-2;10002-84-2	13849	C16537	HMDB00826	28251276	20204532	17354678	24649198	22600668	22513354	26386438	20919848	30441280	22632788	21523158	21002872	23664610	22462116	19364140	22977208	24894710	18632642	19370544	22491970	23629886	17466430	20575592	19783776	23961000	19317580	19054404	18828246	20380540	19715536	20418584	17982590	23263226	30286490	24436552	24600540	28902748
4469	perfluorooctanesulfonic acid (PFOS)	Xenobiotics	Chemical	57564	LC/MS Polar	100010955	662	498.93	1763-23-1	74483	C18142	HMDB59586	377364	351771	367473	347658	449930	347551	397036	344677	355458	329185	438001	371681	407896	344936	388851	311771	392802	429930	335792	396945	321036	362243	360380	285897	374548	297836	329814	321854	354696	366371	346838	316132	262347	263833	274131	337454	253546
138	phenol sulfate	Amino Acid	Tyrosine Metabolism	32553	LC/MS Neg	100001510	2156	172.991	937-34-8	74426	C02180	HMDB60015	25826252	31629308	86725072	99667696	37841920	26950208	24298072	45924436	42783600	44087092	31873336	34131544	69251864	57910832	56647096	40567112	14718186	23165428	33129188	56849440	69503432	27616732	33044596	21557506	58496092	41404912	60462456	45701180	20631532	21172404	29468508	33769304	34818880	47459168	29957544	35621808	30533764
849	phenylacetylcarnitine	Peptide	Acetylated Peptides	48425	LC/MS Pos Early	100006108	3092	280.154	287108-21-8	101724840			442586		334947	307459	185449					197709						331946		366950		344201	79033					93675						306730
854	phenylacetylglycine	Peptide	Acetylated Peptides	33945	LC/MS Pos Early	100001275	2317	194.081	500-98-1	68144	C05598	HMDB00821	79196	28490	73473	18675			70053	33529	88488		59042		70028	36511	65239		111296	63907			124210	70351	55796		93118	91847	89651	100675		62064	189227	52279	79761	70190	117759		50133
109	phenylalanine	Amino Acid	Phenylalanine Metabolism	64	LC/MS Pos Early	460	2878	166.086	63-91-2	6140	C00079	HMDB00159	741267520	594101504	808939968	642626688	786506944	783920896	649209344	576372032	627107136	1017090944	692564608	655204800	742819072	684705920	690201920	878523712	714945792	721060928	716639488	687616320	718479296	692208640	709145600	581481152	654692800	1026189696	649131840	626644928	628189248	661532672	679770432	671838848	806235008	609078784	739153600	680278720	663890944
114	phenyllactate (PLA)	Amino Acid	Phenylalanine Metabolism	22130	LC/MS Neg	100000774	2208	165.056	828-01-3	3848	C05607	HMDB00779	1288022	1168944	750224	879726	1157204	844640	1183217	694468	805733	1.84998e+06	1077993	824840	1576351	1002829	1037316	1263141	795308	660129	1368906	926875	726015	812599	1747836	557891	1269969	1226862	823086	1081601	397829	680341	1401196	823859	952207	753077	1125254	849740	619833
3527	phenylpropionylglycine	Xenobiotics	Benzoate Metabolism	35434	LC/MS Neg	100001591	2945.3	206.082	56613-60-6	152323		HMDB00860	1505840	2.0076e+06	343399	1192958	3015081	249809	1377595	1042656	1035494	952430	691425	450002	3.69002e+06	1167122	1318762	1990321	2127191	2504396	23664	3150938	5299543	379980	3582733	1577061	2413366	1113660	395214	3757717	706551	1735335	3783652	2852629	1.95332e+06	1595598	1541384	268073	2095053
113	phenylpyruvate	Amino Acid	Phenylalanine Metabolism	566	LC/MS Neg	241	2517.6	163.04	156-06-9	997	C00166	HMDB00205	808031	808327	693690	888670	1059300	1242658	1138307	716569	817246	2091751	945025	705360	1376764	642554	1137669	1109555	801489	1007608	1434366	1119128	695471	1273185	869821	576499	1002342	1557871	831442	793965	478905	874546	969875	849829	1180246	525753	1165813	1277973	548145
1078	phosphate	Energy	Oxidative Phosphorylation	42109	LC/MS Pos Early	461	576	98.9842	7664-38-2	1061	C00009	HMDB01429	198756960	215948624	252823680	216551664	258675280	231076720	186031360	194934592	239742496	266340000	287978240	241827408	212337472	337375072	246844784	300295232	219503584	253520928	227846992	222744096	272420928	238696784	239946704	258085760	180939776	227605104	219792736	295061312	223423040	270468416	213402112	196256704	221601456	215126448	252014144	256566304	258558368
1591	choline phosphate	Lipid	Phospholipid Metabolism	34396	LC/MS Pos Early	267	700	184.073	72556-74-2	1014	C00588	HMDB01565	3845230	3986487	4653941	4543080	6945290	4740781	3810350	4605951	5491172	4634779	7512340	5716950	3947553	6488799	4947525	4574150	4237277	5717327	4495144	4033216	6006193	6.27685e+06	4273610	4412893	3.66058e+06	8933610	5.33052e+06	5461267	6397284	8.02477e+06	3964862	3929630	7.05412e+06	4519416	7803399	6649836	6614400
1596	phosphoethanolamine	Lipid	Phospholipid Metabolism	1600	LC/MS Pos Early	1026	700	142.026	1071-23-4	1015	C00346	HMDB00224	2825187	3064570	3575580	3302159	4086655	3106067	1964748	3696637	2453131	3371892	3302414	3476382	2507439	3387607	3438693	3767404	2912736	3692510	2971124	2650293	3788272	4679732	2907201	3375200	2292450	8521573	3588001	3905659	4908960	5648465	3090589	3125393	4951071	3743106	4780774	3873569	4878519
1242	pimelate (heptanedioate)	Lipid	Fatty Acid, Dicarboxylate	15704	LC/MS Polar	100000101	2745	159.066	111-16-0	385	C02656	HMDB00857	186046	165520			142929		222123	212013	270701	112828			172509	266796	278877	116792			196596	114870	181926	106835	123096	107844		104075	262446	244054		82264		143646	173012	138382	171588	167305	118954
1351	pimeloylcarnitine/3-methyladipoylcarnitine (C7-DC)	Lipid	Fatty Acid Metabolism(Acyl Carnitine)	53224	LC/MS Pos Early	100009407	2773	304.175					296249	201853	434391	209543	359285	205050	251464	192463	315445	235701	350248	249113	215688	402491	351848	327372	333182	129835	198467	183002	372100	206357	562339	220804	107167	169329	257891	413658	361514	269620	233434	255364	350452	264105	265035	395648	303398
103	pipecolate	Amino Acid	Lysine Metabolism	1444	LC/MS Pos Early	1025	2200	130.086	4043-87-2	849	C00408	HMDB00070	5347826	3728246	3953267	4510348	5978841	3486318	5501260	5993999	5376353	4182764	6073541	5367962	5922499	5024334	5257290	3.50512e+06	5175016	4595811	4405448	4499104	5435552	5491906	4192070	4218883	4359467	5738679	4593140	4423778	4129140	5875677	4150912	5087307	6785720	5234412	6.26649e+06	8431357	6163003
353	proline	Amino Acid	Urea cycle; Arginine and Proline Metabolism	1898	LC/MS Pos Early	480	1603	116.071	147-85-3	145742	C00148	HMDB00162	845740672	652571648	1008911360	812796032	744009728	774628928	758888192	679294912	745991744	1142131200	593639360	635915520	801785664	663993216	717204352	806134464	505065440	473831040	726442368	707673984	834052032	613262016	674668736	428952384	677178880	1003765248	593767040	614275328	527002112	537270400	645868992	744728128	1063890560	616558144	953649152	773792576	503373024
366	pro-hydroxy-pro	Amino Acid	Urea cycle; Arginine and Proline Metabolism	35127	LC/MS Pos Early	100001167	2128	229.118	18684-24-7	11673055		HMDB06695	4214798	1715663	3463334	4623729	3236724		2653104	4118185	2281386	2149249	906922	3.62434e+06		3.6589e+06	2480137	1300163	2260678	1.91682e+06	2304355	2531239	2.75508e+06	1474154		840029	1626228	2786048	2680057	2.64879e+06	1.66702e+06	2101609	2639256	1924686	1614107		2132965	2182143	2554423
1307	propionylcarnitine (C3)	Lipid	Fatty Acid Metabolism (also BCAA Metabolism)	32452	LC/MS Pos Early	100001162	2590	218.139	17298-37-2	107738	C03017	HMDB00824	60862780	81183712	151625680	62099120	125218736	102194624	65044932	79125504	87619872	165522480	98509696	59168864	52525604	86118128	82462312	159104800	70557248	48060224	73736432	93138568	92131152	46731280	132294360	50724772	43111200	77798272	86958392	86820952	70749016	50704092	70826976	63183160	89976896	72984960	134285680	68653440	64419824
1308	propionylglycine	Lipid	Fatty Acid Metabolism (also BCAA Metabolism)	31932	LC/MS Neg	100001150	960	130.051	21709-90-0	98681		HMDB00783	116452	155287	127989	148175	181697	305728	196330	199088	189471	130039	194525	164357	183337	177725	220828	119881	175341	178106	288323	236560	305258	183646	345978	212726	171579	84680	241223	188437	197857	230915	276022	297110	271479	149734	144724	207659	352114
3283	pseudouridine	Nucleotide	Pyrimidine Metabolism, Uracil containing	33442	LC/MS Neg	821	1100	243.062	1445-07-4	15047	C02067	HMDB00767	3116432	3291587	4119522	4854484	4589747	3267318	2470701	3141951	2556872	3036698	3678897	4269802	5300449	4313408	4242650	2993955	3978461	4104433	3486653	4225521	4741055	3893241	3200727	3097334	4320405	3094490	4942072	4657614	4235016	3957001	4806187	3890280	4372633	4182052	5014275	3724948	4484604
381	putrescine	Amino Acid	Polyamine Metabolism	1408	LC/MS Pos Early	49	3027	89.1073	110-60-1	1045	C00134	HMDB01414	491192	501810	1212909	931864	1.00683e+06	1.01391e+06	726275	669156	562817	514051	1079176	772083	330203	1566059	785607	742219	774599	879546	1278438	1380592	1143063	787844	609519	451225	768577	1644733	1049669	1518106	991503	1406908	994343	1345837	1364072	1206531	1616843	1687467	1164827
3449	pyridoxal	Cofactors and Vitamins	Vitamin B6 Metabolism	1651	LC/MS Neg	491	1534.9	166.051	65-22-5	1050	C00250	HMDB01545	396171	519673	826039	570772	578453	621029	754715	533349	409480	953171	797303	524991	462693	717968	585993	937444	426894	614168	610899	691994	543772	656058	483428	506336	489314	561115	571697	797347	288032	485360	474752	539656	359447	390471	634521	424180	331150
3450	pyridoxate	Cofactors and Vitamins	Vitamin B6 Metabolism	31555	LC/MS Neg	100001121	2185	182.046	82-82-6	6723	C00847	HMDB00017	2749787	3426443	4.05522e+06	2927589	4459594	2967366	3939166	3819967	3300974	3.4409e+06	4475449	3.75182e+06	3991580	6964278	4503398	5000034	4023506	4617335	4355949	5950754	5012188	4885349	6107809	4017118	3501144	2794142	3.45219e+06	5403540	3.5329e+06	3796094	3308422	3991748	2991360	2638293	3116135	2656788	3221429
881	pyruvate	Carbohydrate	Glycolysis, Gluconeogenesis, and Pyruvate Metabolism	48990	LC/MS Polar	823	1083	87.0088	127-17-3	1060	C00022	HMDB00243	6173421	6895344	7149801	7775782	6114201	5766533	8181763	7808852	5230181	5584942	5877423	5112530	10621944	4264250	6651007	5618146	6158323	6225574	6316488	12020213	5290401	8785339	5.05583e+06	4290131	7031617	10712713	8258384	6045620	4590694	7207563	6147181	8115860	7666421	4572117	5915217	8802781	4144455
3336	quinolinate	Cofactors and Vitamins	Nicotinate and Nicotinamide Metabolism	1899	LC/MS Polar	182	3000	166.015	89-00-9	1066	C03722	HMDB00232	161712	105565		196658	58091				48276			147401	150139							126643	215021	43145			78524		56426	102930					208674	102793	188947	151955	157508
3641	retinal	Xenobiotics	Food Component/Plant	40807	LC/MS Pos Late	100004088	1666	285.221		638015	C00376	HMDB01358		29942		42418	57003			43081			39656	35502	88510						36679	45878	61560	52354	49993		89566						40651	59546	20299	36725
3439	retinol (Vitamin A)	Cofactors and Vitamins	Vitamin A Metabolism	1806	LC/MS Pos Late	498	1636	269.226	68-26-8	445354	C00473	HMDB00305	4473635	3957848	2321715	4636719	4702489	2506452	4421357	3240296	3504045	2037921	4558779	3219558	5478468	3366813	2975923	2040778	4236193	5257360	2657516	3928360	4536917	6055878	3134563	2534614	4911374	839344	3268301	2319376	1697630	1105059	3071922	3304240	1907319	2693295	1316304	1566968	1771646
900	ribitol	Carbohydrate	Pentose Metabolism	15772	LC/MS Polar	100000406	1789.6	151.061	488-81-3	6912	C00474	HMDB00508	103711	68800	111709	98043	83432	81009	123171	88336	86089	114466	105043	83747	92810	122617	104800	74989	80378	100034	129125	57975	90439	69242	112261	93174	70306	81527	88056	90384	80935	64271	94439	89292	120697	94482	94234	75013	71544
3363	riboflavin (Vitamin B2)	Cofactors and Vitamins	Riboflavin Metabolism	1827	LC/MS Neg	500	3160	255.089	83-88-5	493570	C00255	HMDB00244	165953	199026	268540	282597	285178	229914	152470	226882	207424	327725	270213	355598	314754	291666	402498	319109	234474	285817	336683	307597	309273	313296	259633	252328	307979	280264	344005	336435	287265	273869	374982	276357	336173	400763	358306	210792	247114
901	ribonate	Carbohydrate	Pentose Metabolism	27731	LC/MS Polar	100001007	2425	165.04	5336-08-03	5460677	C01685	HMDB00867	11886385	11007554	6004049	9207098	12482214	8285839	9966578	9765054	10294169	6491758	11744512	10003033	12366888	12110900	10326672	6199339	9947947	11474857	11286646	8698049	10623441	10080133	10564513	8266061	10775806	6858449	11443583	9744598	8256334	9360429	12939457	10668503	9610860	10140835	8608000	9423968	7539164
4424	S-(3-hydroxypropyl)mercapturic acid (HPMA)	Xenobiotics	Chemical	44552	LC/MS Neg	100004568	1576	220.065	23127-40-4	3371179			63979	68647	101822	56453	93890	62863	67184	80129	68625	91345	63136	72560	103022	98477	106232	75939	75566	96090	103385	102586	115539	49516	65721	46988	84371	76609	88284	98795	49128	60762	74026	93256	101349	62979	100466		62222
317	S-adenosylhomocysteine (SAH)	Amino Acid	Methionine, Cysteine, SAM and Taurine Metabolism	42382	LC/MS Neg	197	1832.4	383.114	979-92-0	439155	C00021	HMDB00939	263104	139388	329768	115688	590079	228527	230108	298260	663537	214111	498289	213543	341643	444230	419181	228957	288703	467155	598274	270680	347783	147598	440167	176096	128216	76265	174471	181418	124333	77140	465272	121215	164285	169143	136446	76773	42713
4231	salicylate	Xenobiotics	Drug	1515	LC/MS Neg	501	2195	137.024	69-72-7	338	C00805	HMDB01895	778354	855490	650653	683986	1224721	1219750	1067095	975159	1170079	1668958	1077423	695785	934838	659269	1011600	916674	845152	606614	711611	821832	686602	831124	848393	542230	645550	678616	865738	1029348	341832	511309	742535	659715	946784	770769	1165537	812590	740975
1248	sebacate (decanedioate)	Lipid	Fatty Acid, Dicarboxylate	32398	LC/MS Neg	100001211	1788	201.113	111-20-6	5192	C08277	HMDB00792	343858	145297	218622	197580	132878	205338	230081	164980	460084	254875	146855	282664		203418		275910	129673		122506	200045		155566	151220	135744	219890	227630	245818	291158	315781	124400	275387	194017		289948	279149	123995	144331
9	serine	Amino Acid	Glycine, Serine and Threonine Metabolism	1648	LC/MS Pos Early	503	1239	106.05	56-45-1	5951	C00065	HMDB00187	110058200	93754240	149656784	99073952	100797592	117771648	95226984	91178600	97944336	170499200	89342056	88776176	101786768	102130904	93766272	143862368	80926680	82918976	90954456	91392360	117897624	95620200	87604576	60621080	87520672	147635168	79873872	84147312	83093064	86875104	92681024	90968832	95112440	91632064	102524832	86305184	76454520
218	serotonin	Amino Acid	Tryptophan Metabolism	2342	LC/MS Pos Early	504	2550	177.102	153-98-0	5202	C00780	HMDB00259	977012	3142062	896109	1190291	1216052	820535	2317138	1265696	1348241	1263826	1048757	8626091	11447422	1472776	994322	2581433	903701	2849867	5020300	4901054	2036676	1005967	744985	6196903	1037392	49088752	3457483	876816	24244172	1098026	10783722	1515984	1058330	839125	495101	705270	13904457
325	S-methylcysteine	Amino Acid	Methionine, Cysteine, SAM and Taurine Metabolism	39592	LC/MS Neg	100002749	880	134.028	1187-84-4	24417		HMDB02108	58813	45498	55593	96168	44758	42684	30724	50327	51722	41162	27717	70731		55164	16586		67099	74730	21867		70837	59830	34274	57977		44690	37285	77888	108723	115365	72072	63557	37406	93067	36047	57919	103145
405	S-methylglutathione	Amino Acid	Glutathione Metabolism	33944	LC/MS Neg	100001259	1075	320.092	2922-56-7	3605667	C11347		63091	123867	141433	181097	178619	112121	82133	100675	81164	111594	165107	142261	207775	222836	195136	57060	133774	110006	186302	194102	189968	126569	109556	114080	144501	139625	283322	194715	256890	158624	202671	127021	157059	164115	226676	105788	147872
309	S-methylmethionine	Amino Acid	Methionine, Cysteine, SAM and Taurine Metabolism	38127	LC/MS Pos Early	100002183	2584	164.074	3493-12-07	458	C05319	HMDB38670	3554127	1767145	4080516	5997550	3907717	3145749	2957935	2407969	2567737	3180446	2543712	3912031	1535960	2508701	3103432	1717829	3633641	2001500	3396539	3308961	2742944	1968952	2405422	1119771	1934074	4103722	2952092	2716156	3060548	2828473	2.04585e+06	3638158	4309347	3152168	5350549	3981599	2978152
382	spermidine	Amino Acid	Polyamine Metabolism	485	LC/MS Pos Early	50	3355	146.165	124-20-9	1102	C00315	HMDB01257	5.4885e+06	6132741	10388338	8544109	10347484	6034945	4459275	9105022	6109849	6278537	7179800	8407093	7775485	7451582	7736513	10240075	10523231	7072068	9949654	11076062	7539863	11931865	8123372	6421951	8708858	17930152	8941667	6679243	10232977	9870310	9129518	11404885	7.37708e+06	6722017	6970752	8214945	8147905
2239	sphinganine	Lipid	Sphingolipid Metabolism	17769	LC/MS Pos Late	313	1413	302.305	3102-56-5	3126	C00836	HMDB00269	207402	295979	257906	348419	257542	286999	272513	248423	242611	239804	327196	406753	418958	345928	209828	294056	259593	454821	371322	404969	499014	488593	332208	533049	387854	884870	327754	310424	744723	840737	433267	388221	1104223	560356	612145	879968	1182257
2240	sphinganine-1-phosphate	Lipid	Sphingolipid Metabolism	52605	LC/MS Pos Late	100001876	1431	382.272	19794-97-9	520		HMDB01383	412927	387818	393947	587754	537892	515966	472892	354483	440173	434645	685858	787140	530507	604933	425442	515024	470565	613476	497334	488740	227568	600483	476327	513787	361730	588070	501456	653174	806561	918896	432612	424790	1132074	776036	977041	1038195	869699
2257	stearoyl sphingomyelin (d18:1/18:0)	Lipid	Sphingolipid Metabolism	19503	LC/MS Pos Late	1538	2400	731.606	85187-10-6;85187-10-6	6453725	C00550	HMDB01348	9983345	7873895	7344447	12571501	10934876	9502654	7859791	9268978	11159754	7150376	10082894	9174949	10896644	10890916	9675271	7483982	9244846	10141266	8718000	8.31592e+06	11970039	9675392	12912914	8981803	8491136	10151984	10311345	12035540	17834548	13099697	12803608	11145658	15633431	12364698	11462258	21316604	18664204
2264	sphingomyelin (d17:1/16:0, d18:1/15:0, d16:1/17:0)*	Lipid	Sphingolipid Metabolism	52433	LC/MS Pos Late	100006314	2082	689.559	121999-58-4				8478534	7733135	9463722	10948620	10089425	11595837	10082534	9106390	9779161	9428105	12354831	9619971	10402547	8071174	9584255	13001296	10430745	8342282	9099545	9214806	8051080	9283823	13546540	7664460	7374099	8264873	8350725	8961756	9458657	9765957	8510226	9050409	10929699	10191585	7254456	14394218	11426678
2308	sphingomyelin (d18:0/18:0, d19:0/17:0)*	Lipid	Sphingolipid Metabolism	57473	LC/MS Pos Late	100009027	2362	733.622				HMDB12087	342374	253682		519631	300571	295746	248007	205406	345506	215278	329818	452873	359534	327939	252336	216770	258974	268942	329375	238923	385669	418763	444457	284207	280704	408088	280565	407332	632443	716566	286773	332530	677005	597555	411642	1097459	1083496
2262	sphingomyelin (d18:1/14:0, d16:1/16:0)*	Lipid	Sphingolipid Metabolism	42463	LC/MS Pos Late	100004328	1998	675.544		11433862		HMDB12097	3550485	2843452	2554369	3605615	3326027	3008013	3143139	2644135	2479659	2345438	3804075	3438591	3619784	2685318	2851353	3554432	3163021	3.36904e+06	3146810	3184928	2513030	4375913	3.17987e+06	2551798	2835765	2472631	3140114	3.01679e+06	3.89116e+06	4503995	2730196	2861994	3926638	4.14479e+06	3022781	4445760	4182270
2266	sphingomyelin (d18:1/17:0, d17:1/18:0, d19:1/16:0)	Lipid	Sphingolipid Metabolism	52615	LC/MS Pos Late	100008920	2312	717.591	121999-64-2				2424712	1466048	1574965	2653521	1.95612e+06	2.04027e+06	1851567	1540223	1869297	1418785	2104200	1883473	2261113	1764210	1748533	1659779	2106813	1878235	1648876	1634374	1748558	2275893	2440958	1404008	1601210	1807703	1866484	2384695	2584675	2177283	2217430	1996824	2532570	2585449	2131674	3491474	2670915
2267	sphingomyelin (d18:1/18:1, d18:2/18:0)	Lipid	Sphingolipid Metabolism	37529	LC/MS Pos Late	100002106	2167	729.591	108392-10-5	6443882		HMDB12101	3.96597e+06	3203856	3003341	4822864	3.54614e+06	2778804	3278624	3392720	3416458	2548821	3712872	3.88444e+06	3.76117e+06	3348056	3513442	2821053	3.59249e+06	3548239	3638265	3258051	4.02534e+06	4022059	4201890	3617673	3103450	3765799	3232856	4068568	4710652	4288468	4277608	3739785	4907521	4701857	3.86239e+06	5148770	5043538
2311	sphingomyelin (d18:1/19:0, d19:1/18:0)*	Lipid	Sphingolipid Metabolism	57475	LC/MS Pos Late	100015787	2330	745.622					829157	540019	492903	1013676	857828	789570	710803	307229	584689	501533	857888	853623	748893	748416	661913	588173	672990	590184	459526	573411	587812	692451	952215	503234	740810	481887	550855	720891	1058701	761720	691475	675591	1031421	909767	546723	1.4272e+06	1096932
2268	sphingomyelin (d18:1/20:0, d16:1/22:0)*	Lipid	Sphingolipid Metabolism	48490	LC/MS Pos Late	100006290	2685	759.638				HMDB12102	7820557	5757114	5673378	9981031	7915406	6217348	6866314	6559607	7435799	4607122	10051809	8.25863e+06	8285605	8.11315e+06	6487266	5751221	7137570	8546278	6902003	6883283	7327780	9108573	7494482	6761156	6781626	5616614	5971327	7.80481e+06	9400574	8992175	7.82243e+06	7246422	10107330	9907544	6538470	13170552	10527645
2269	sphingomyelin (d18:1/20:1, d18:2/20:0)*	Lipid	Sphingolipid Metabolism	48491	LC/MS Pos Late	100006292	2383	757.622	222403-67-0				1344907	1373977	1063898	1651094	1157767	972308	1123135	1121393	1064637	878919	1342118	1385006	1.44213e+06	1.32136e+06	1.35762e+06	1153880	1250199	1483358	1.34149e+06	1023934	1.60818e+06	1.46544e+06	1505424	1513343	1143621	1331258	1274860	1285834	1727121	1712800	1941243	1514521	1753753	1231742	1310778	1888427	2041382
2301	sphingomyelin (d18:1/20:2, d18:2/20:1, d16:1/22:2)*	Lipid	Sphingolipid Metabolism	57481	LC/MS Pos Late	100006293	2039	755.606																120645				54218										142435			232063				209502		137340	189886
2270	sphingomyelin (d18:1/21:0, d17:1/22:0, d16:1/23:0)*	Lipid	Sphingolipid Metabolism	52495	LC/MS Pos Late	100009025	2793	773.653					1435751	1779760	1310490	1944073	2170005	1735731	1912645	1725159	1.87015e+06	1.03113e+06	3100964	2.04418e+06	2648118	1777204	1.80142e+06	1804718	2020264	2171011	1793996	1753430	1915648	2382161	2439681	2260287	1.72049e+06	1.01585e+06	1481209	1624507	1933532	1.98386e+06	1732492	2.02748e+06	1770797	1.92711e+06	981262	2640778	2115224
2271	sphingomyelin (d18:1/22:1, d18:2/22:0, d16:1/24:1)*	Lipid	Sphingolipid Metabolism	48493	LC/MS Pos Late	100006295	2666	785.653				HMDB12104	17123372	15488410	12534666	20168018	19336564	14141219	17989552	16303118	17367314	10049338	26031438	20422072	22361096	20376672	14875809	13807486	18206456	20079188	16844088	18535120	17573066	24863400	18984812	17233944	16726946	12716527	13611064	16300298	19964508	22223824	17564372	16679742	22162142	21015512	15111431	28918180	24184516
2306	sphingomyelin (d18:1/22:2, d18:2/22:1, d16:1/24:2)*	Lipid	Sphingolipid Metabolism	57477	LC/MS Pos Late	100006296	2209	783.637					1567007	1355250	1283947	2196569	1546646	1507092	1408003	1372635	1733363	1220850	1477772	1676251	1345830	1611408	1546280	1436316	1786086	1472617	1257849	1365936	1677175	1555697	1740512	1414285	1433639	1912398	1497639	1720337	2144115	2108576	1.93105e+06	1850669	2567155	2.06317e+06	1920720	3054581	2755537
2273	sphingomyelin (d18:1/24:1, d18:2/24:0)*	Lipid	Sphingolipid Metabolism	47153	LC/MS Pos Late	100005986	3033	813.684	94359-13-4			HMDB12107	179396656	131211440	78211872	199489744	154278624	120123304	143972000	119694344	141425584	72506840	181683792	159352752	184516816	124358520	137069248	90021584	170576976	183863456	163067376	142892608	164673792	217137264	108857008	113798280	168466800	114442744	160913056	132673512	177558160	203113600	137008256	182393888	216806208	184756368	186927008	205429376	214629968
2305	sphingomyelin (d18:1/25:0, d19:0/24:1, d20:1/23:0, d19:1/24:0)*	Lipid	Sphingolipid Metabolism	57478	LC/MS Pos Late	100015792	3220	829.716					108097			299844	176535	98123			74374			355760	258156	195721	149058	80605	200412	136538	191604	216244		173104	272005		172445		154124		300330	297508	240379	223681	356145	247232		448066	452704
2263	sphingomyelin (d18:2/14:0, d18:1/14:1)*	Lipid	Sphingolipid Metabolism	47154	LC/MS Pos Late	100005985	1860	673.528						74235				109213	57687				139007	74477	153959	70465		155398	79991	139957	79455	131959	58311	140833	90449	108633	73021	112042	77561		159372	158895	57652		113135	58521			145172
2265	sphingomyelin (d18:2/16:0, d18:1/16:1)*	Lipid	Sphingolipid Metabolism	42459	LC/MS Pos Late	100004329	2002	701.559					27633942	22322840	17606696	28655536	26748608	19774890	25910600	18998614	22815668	14770881	28824484	26100216	24109692	22891448	22242552	17870840	23866798	25069038	22088524	22992912	18136554	29057708	24661624	19165436	20312448	15514949	23161540	24583454	30365144	28617268	22034984	23711380	25637962	30199324	22479708	34242152	27712690
2310	sphingomyelin (d18:2/18:1)*	Lipid	Sphingolipid Metabolism	57474	LC/MS Pos Late	100015788	1904	727.575					726492	734033	651574	1.01868e+06	777818	843813	652843	656756	620156	470732	711226	910842	858065	837530	640177	860730	769941	891964	811150	601339	791213	935607	931076	763853	542826	775947	789141	777994	1260199	1172390	931813	801654	1159315	1069923	737803	1246310	1306735
2272	sphingomyelin (d18:2/23:0, d18:1/23:1, d17:1/24:1)*	Lipid	Sphingolipid Metabolism	52435	LC/MS Pos Late	100008956	2845	799.669					8757369	9724954	7217243	11650316	11386185	9878680	10886262	8158621	9321165	5698785	15186634	10606999	14176284	8787435	8958575	8398850	11844676	10677212	9720177	11314334	9729199	13880619	11418755	10018142	9225069	6484974	7989959	8124881	10790624	10829003	9500091	10483755	9783624	10532760	6676304	12215631	12640569
2299	sphingomyelin (d18:2/23:1)*	Lipid	Sphingolipid Metabolism	57482	LC/MS Pos Late	100015791	2315	797.653					1194187	1054270	757262	1733024	1339059	1552685	1403359	1073434	1313693	1091429	1745492	1.5904e+06	1363671	1080350	1241059	1240519	1780084	1273438	1203676	1222872	1206568	1577043	1272171	1003398	1110258	866863	1210959	1338099	1413816	1488565	1156145	1299722	1817525	1559027	1111782	2164580	1981764
2274	sphingomyelin (d18:2/24:1, d18:1/24:2)*	Lipid	Sphingolipid Metabolism	52437	LC/MS Pos Late	100008957	2635	811.669					61432408	45601580	37714784	69691560	58139896	47437636	57629448	45928292	58556276	35699280	64917820	59604608	65514152	50458056	48355400	40640352	58881060	52841756	48610980	52366840	53572036	65536392	46104276	40378636	48930172	49737992	45611064	53910960	59208776	67077848	50584812	57604664	75734312	75080184	62350960	86914488	82472504
2302	sphingomyelin (d18:2/24:2)*	Lipid	Sphingolipid Metabolism	57479	LC/MS Pos Late	100015789	2215	809.653					3365154	2641748	2521027	4762613	3282265	4002022	2967706	2634819	4162469	2728819	3817259	3806651	2884879	3024593	3659082	3089583	3638415	2627000	2842731	2693569	3185897	2834254	3412451	2502496	2490323	3692358	3123127	3566291	3509576	3904791	3807603	3860452	4290382	4607022	4211657	6359816	5495022
2277	sphingosine	Lipid	Sphingolipid Metabolism	17747	LC/MS Pos Late	297	1393	300.29	123-78-4	5353955	C00319	HMDB00252	382384	392389	517742	430700	439034	457003	431535	391608	360170	459519	457568	602998	773932	473279	246317	516796	404748	563206	752993	564414	629269	722441	381479	650931	576618	1555757	346137	408643	979337	822479	728450	688980	1003921	678980	558361	810226	1039919
2278	sphingosine 1-phosphate	Lipid	Sphingolipid Metabolism	34445	LC/MS Pos Late	100000626	1375	380.256	26993-30-6	5283560	C06124	HMDB00277	2211197	1754692	1891226	2089096	1971720	2248960	2173375	1517851	2046086	1914929	2342165	2203370	2029525	1828561	1728585	1648728	1734460	1979502	1999412	1875260	1427289	2159052	1358474	1713115	1847667	2498343	1660235	1911434	2082881	2326054	1777744	1991075	2078117	2162660	2098285	2437996	1941502
3868	stachydrine	Xenobiotics	Food Component/Plant	34384	LC/MS Pos Early	100001296	1440	144.102	4136-37-2	115244	C10172	HMDB04827	97904280	79771232	76040576	81215168	108316224	69234368	95826248	70422448	102083800	96210992	116697784	93254016	85708912	72016568	87391344	81757880	79472592	91847456	81009952	97155760	88209384	74035520	65605184	52298612	79573192	62589592	103732416	89015040	58387136	55915492	69788312	86759216	94447312	69799696	96838912	68377408	51125132
1113	stearate (18:0)	Lipid	Long Chain Fatty Acid	1358	LC/MS Neg	439	5872	283.264	57-11-4	5281	C01530	HMDB00827	473587424	379047328	277369792	578888512	496297184	406896128	423112672	412140416	535833888	372432032	446354592	412078336	564057536	417123936	384354816	394854080	456346656	390152960	415868384	445997440	434518208	299584384	423618464	337243776	523703584	305860480	342265056	292564064	425619296	374569536	347139104	293756544	450923968	655079424	397867872	531530432	645538240
1145	stearidonate (18:4n3)	Lipid	Polyunsaturated Fatty Acid (n3 and n6)	33969	LC/MS Neg	100001229	5395	275.202	111174-40-4	5312508	C16300	HMDB06547	2279164	1914025	1.45458e+06	1.91341e+06	1956990	2165614	1862864	1.57739e+06	2938543	1057530	1845227	1332428	2920305	2272025	1004059	2123622	1912042	2144262	1222888	1331175	1803487	1168803	2630388	1969253	2525306	1086300	1593373	1438952	1732170	2576835	1527411	1054093	2163478	3819391	1.57161e+06	3180469	4874696
1537	stearoyl ethanolamide	Lipid	Endocannabinoid	38625	LC/MS Pos Late	100002254	1787	328.321	111-57-9	27902		HMDB13078	700481	464867	674464	539428	774496	923323	459763	355462	630471	476596	537469	331418	736327	482350	450749	522759	551516	666338	422801	443213	431854	541265	548617	420556	892798	707591	451921	459944	859003	577199	461128	505258	971951	949810	461527	690948	1112789
1340	stearoylcarnitine (C18)	Lipid	Fatty Acid Metabolism(Acyl Carnitine)	34409	LC/MS Pos Late	100001391	1485	428.373	18822-91-8	6426855		HMDB00848	4803078	3698028	5.74744e+06	5.55492e+06	5114402	4389479	3112958	3480237	4637225	2.9812e+06	3884274	4861531	5.01156e+06	4615518	4193459	3095291	5678707	4362948	3336758	3610485	4244485	5235813	3057364	3176165	4232856	4837823	4847497	5039863	6387464	5940173	4038985	4702079	4569252	6385441	3671514	5485007	6050362
1244	suberate (octanedioate)	Lipid	Fatty Acid, Dicarboxylate	15730	LC/MS Neg	100000016	804.3	173.082	505-48-6	10457	C08278	HMDB00893	273519	245883	563005	312418	261541	317008	170625	337185	101350	370095	285005	247362		390950	692638	428893	349413	521111	346454	244621	587489	274660	254762	253033	568420	391373	522484	413457		333318		384678			430945	181397	524760
1062	succinate	Energy	TCA Cycle	1437	LC/MS Polar	252	3149	117.019	110-15-6	1110	C00042	HMDB00254	80166600	153491424	149899872	92018864	145375344	105595768	115033832	114268632	92346176	98457280	143036640	95066864	110454544	190682416	101845664	110650592	111508864	124652232	158854720	146726384	175144592	75656672	155050816	128876040	87256656	90399240	128983872	104495704	114353376	89026624	141965376	106945456	97070944	96142280	82275264	67076264	109907792
1061	succinylcarnitine (C4-DC)	Energy	TCA Cycle	37058	LC/MS Pos Early	100001948	2291	262.129	256928-74-2	71464481		HMDB61717	380512	440498	320486	428995	446119		548851	368592	536491		337652	322973	906539	3223365	422566			331164	900949	832732	466676	730783	554927	400472	532373	571273	700793	145471	836098	277709	638321	581988	468269	655728		379178	590854
4374	sulfate*	Xenobiotics	Chemical	46960	LC/MS Neg	100002528	616	96.9601	14808-79-8	1118	C00059	HMDB01448	10560375	11626839	12297753	10763669	10669794	10959486	12869172	10859766	8795701	12662063	9494051	10541518	10942263	8753911	10346822	12277397	10720577	11746840	10990720	11658016	15578127	13604944	10642051	11930201	11461775	13324908	10857016	10339435	8817301	10323759	9190069	11561952	12094533	12366832	11043677	10553364	12743880
335	taurine	Amino Acid	Methionine, Cysteine, SAM and Taurine Metabolism	2125	LC/MS Pos Early	512	660	126.022	107-35-7	1123	C00245	HMDB00251	131469984	116399280	182086352	121358272	165106528	137331408	137684592	132525944	103459376	131249696	208586112	146918720	120583392	278055264	154975728	156792384	137968784	142888288	144306176	146539552	191505792	172024896	157017168	140153760	127686176	160048496	134007736	139511408	130094912	181855840	125208312	129349736	144873392	146940864	152441392	144456944	188599648
2563	tauro-alpha-muricholate	Lipid	Primary Bile Acid Metabolism	42605	LC/MS Neg	100004064	4745	514.284							24953064								532583
2564	tauro-beta-muricholate	Lipid	Primary Bile Acid Metabolism	33983	LC/MS Neg	100001250	4774	514.284	25696-60-0	168408		HMDB00932	5167097	3836293	182925408	4260641	8937519	140518224	2260127	4027093	2152091	219273440	5492446	4327694	4339241	2199778	4468021	315060128	2001008	3474154	1986839	3.34044e+06	2414910	4068164	1185123	2245084	1817560	198102608	5236854	3673322	4048838	6187798	2056364	2207122	23425492	11550152	15933055	8282144	9470601
2560	taurochenodeoxycholate	Lipid	Primary Bile Acid Metabolism	18494	LC/MS Neg	1629	5250	498.289	6009-98-9	387316	C05465	HMDB00951	131857	75488	31570828	60239	396324	6.58433e+06	135489	137971	87046	35127868	204029	136140	80989	78884	151410	35702404	55058.1	136577	92232	138785	73160	184683	13687.2	44746.6	57041	11070873	81988	94904	151520	128413	59005	47578.8	666044	251784	275063	388411	596534
2557	taurocholate	Lipid	Primary Bile Acid Metabolism	18497	LC/MS Neg	1648	5150	514.284	145-42-6	6675	C05122	HMDB00036	1079870	2355148	125143664	808939	5936024	99351200	2298079	2857775	3515887	174047840	5911206	2075489	1558664	2713570	4013272	254180448	1384913	2325446	954939	3077003	1318623	5657958	559780	1353658	663699	77683896	2568436	987743	3222096	2300446	814922	1780113	17781770	5111662	5236638	7.49886e+06	6231115
2575	taurodeoxycholate	Lipid	Secondary Bile Acid Metabolism	12261	LC/MS Neg	1668	5257.4	498.289	207737-97-1	2733768	C05463	HMDB00896	214911	538288	13659116	91460	670915	6.98552e+06	307053	473409	301109	19556420	384252	235403	162195	166389	397773	23250272	476696	599755	250744	727993	367251	1012347	105135	231411	137301	5850129	299245	226240	497949	451563	193814	410294	1599034	858782	423243	579778	675711
2597	taurohyodeoxycholic acid	Lipid	Secondary Bile Acid Metabolism	43588	LC/MS Neg	100003869	5073	498.289	38411-85-7	119046			583583	393643	24363748	311254	1088075	9952111	311150	496484	141088	21870468	413284	283003	414684	190073	416909	32782860	411527	320702	305323	637810	456255	784706		132903	235634	26209344	403770	267467	549477	560769	305287	470131	2.87542e+06	1026322	634133	598681	1170296
2587	tauroursodeoxycholate	Lipid	Secondary Bile Acid Metabolism	39378	LC/MS Neg	100002912	5025	498.289	14605-22-2	9848818		HMDB00874	306927	196113	12325092	190180	290663	6599172	125557	137614	186266	12748076	217370	195454	182789	137927	207162	20036180	94896	239049	130138	213139	147134	233981	50695	92772	161967	10162940	184691	175744	171165	391353	140387	98038	954794	508288	364031	489441	527974
1252	tetradecanedioate	Lipid	Fatty Acid, Dicarboxylate	35669	LC/MS Neg	100001613	4000	257.176	821-38-5	13185		HMDB00872	303959	555767	1425487	154590	610775	950162	361293	502147	288812	957857	732610	584652	811403	706219	602901	1253484	555921	737856	561616	169309	853881	662652	742550	735712	615091	1016889	675338	475719	685266	629543	695237	476445	750145	615872	271789	412707	735357
3431	thiamin (Vitamin B1)	Cofactors and Vitamins	Thiamine Metabolism	5341	LC/MS Pos Early	873	3050	265.112	59-43-8	1130	C00378	HMDB00235	1768055	1.94962e+06	1585769	1921052	2.08594e+06	1552345	1950615	1826543	1454327	1352768	2080324	1.97887e+06	1365812	2747027	1994719	1744178	1.84138e+06	1835061	2330117	2273623	2652594	2095986	1752726	1723427	1698801	1488277	2.08116e+06	1968306	1778174	1711514	2131693	2378184	1913205	1898054	1683434	1475924	1520002
4512	thioproline	Xenobiotics	Chemical	53231	LC/MS Pos Early	100009232	1250	134.027	34592-47-4	93176			1472206	1039005	705715	1234503	608015	560617	758638	965232	674543	254027	656544	1384951	626657	657144	653329	316525	698163	684658	509869	649240	835230	602718	534779	609719	534675	248418	766018	1224628	905951	1018858	1456846	723023	396560	747918	389569	1038652	302296
3379	threonate	Cofactors and Vitamins	Ascorbate and Aldarate Metabolism	27738	LC/MS Polar	100001022	2384	135.03	70753-61-6	151152	C01620	HMDB00943	9816748	13712905	11249046	16026140	17133040	14732128	18733664	16478209	13162862	13330491	24661588	21567442	11346202	15797359	22568520	22422164	11712253	24973588	18421354	16765812	14561441	20957584	35054436	34523860	10058444	10955631	20871152	23076504	15010541	29282174	18355154	16852348	13131673	16236997	14967103	19717458	28309320
16	threonine	Amino Acid	Glycine, Serine and Threonine Metabolism	1284	LC/MS Pos Early	564	1514	120.066	72-19-5	6288	C00188	HMDB00167	602241024	401380096	359703168	546995456	406195712	275179008	434889696	346469184	410556288	347841568	308044640	342363744	442706592	437597792	383896992	278136960	296412640	295493728	377588992	398223552	508285184	399121152	347141856	226929280	433464608	333875488	332456096	407454336	344492064	321967936	418693088	414906080	510406272	462371936	508948192	387731456	333459296
3328	thymidine	Nucleotide	Pyrimidine Metabolism, Thymine containing	2183	LC/MS Pos Early	872	1400	243.098	50-89-5	5789	C00214	HMDB00273	1065937	619840	1225601	1071574	915926	883837	979002	608883	1358264	696419	919690	667310	741728	950294	879636	716389	840232	840169	872037	840688	1089791	808345	618413	532408	625783	1507280	614254	685390	1024570	632904	839496	936028	1236377	1087792	1111190	1518475	1228285
3329	thymine	Nucleotide	Pyrimidine Metabolism, Thymine containing	604	LC/MS Neg	882	1654	125.036	65-71-4	1135	C00178	HMDB00262	46162		83613		71813	84946			68674	55015				91574			61832				103630			104427		111990		61206		61637	36489		123635	84797	70012	116342	153241
190	thyroxine	Amino Acid	Tyrosine Metabolism	2761	LC/MS Neg	1094	4808	775.679	51-48-9	5819	C01829	HMDB01918	90792	103926	26238	96858	139401	29403	103000	119451	105151		131874	134837	138771	135455	107553		91108	142308	114598	142151	113923	142865	88254	62849	159676		106948	125771	73722	49747	106323	103218	56648	101973	28298	60541	28494
284	tigloylglycine	Amino Acid	Leucine, Isoleucine and Valine Metabolism	1598	LC/MS Pos Early	1161	1926	158.081	35842-45-6	6441567		HMDB00959	882758	853530	955094	950024	1307773	436388	573340	972433	908846	491991	913846	923333	912884	1500172	1.01739e+06	460618	1268253	1160560	1268821	771337	1541234	962333	1133679	1259428	699349	362659	1023001	1025636	923506	1.02628e+06	1060140	957901	1023721	667690	906327	927562	1570513
2259	tricosanoyl sphingomyelin (d18:1/23:0)*	Lipid	Sphingolipid Metabolism	52436	LC/MS Pos Late	100008955	3200	801.684				HMDB12105	26392348	34476328	14253462	30158626	28384066	22030476	23216750	19039442	25754680	11085599	35699504	29228944	37232088	22970696	29538248	21507008	26029540	47254248	31718808	20698276	34291456	60158920	37015308	30907792	41058352	17210960	29453570	31158096	36612216	42178840	27955320	35953948	36476208	30377532	23236936	30994240	28959662
3357	trigonelline (N'-methylnicotinate)	Cofactors and Vitamins	Nicotinate and Nicotinamide Metabolism	32401	LC/MS Pos Early	100001092	1388	138.055	535-83-1	5570	C01004	HMDB00875	110812760	91085216	59734092	86088712	107821288	73185672	120374328	78127024	108961408	91841984	117876256	94060416	101197424	94092128	96145512	78781536	64539972	80441104	95303888	103214704	95847936	82087256	74672432	61620664	104423720	72210416	101956424	87883200	70854464	50598456	78105736	103495160	110011232	92641088	102886520	92946496	47137232
1601	trimethylamine N-oxide	Lipid	Phospholipid Metabolism	40406	LC/MS Pos Early	100003397	2100	76.0757	1184-78-7	1145	C01104	HMDB00925	82007384	35237712	24428762	46434072	38255096	16696009	50440292	35627368	62581784	33534092	41114876	32471420	53902124	102523368	66990080	19139464	27784524	37324504	24778156	59550484	51621136	29325334	38918156	38643056	55877256	13122116	95614104	46396644	24276706	31513660	36149444	39096632	68413616	76030984	84194192	90216920	54466796
194	tryptophan	Amino Acid	Tryptophan Metabolism	54	LC/MS Pos Early	565	2986	205.097	73-22-3	6305	C00078	HMDB00929	639074496	591240576	771239296	601572288	646979072	627229056	593003392	525843200	549075712	636373248	531413184	593721152	391501984	603276928	629124288	582540352	611177216	577782720	655552768	691955840	729141504	609150592	600776640	456387392	512941088	699790784	642931840	617572544	595798336	645713856	576188992	635228608	598271040	648086528	606172160	539997568	567062592
123	tyrosine	Amino Acid	Tyrosine Metabolism	1299	LC/MS Neg	815	1322	180.067	60-18-4	6057	C00082	HMDB00158	35063380	30131416	45067016	35008120	32798082	28576224	27381008	23461556	22969936	44480088	22320212	25163312	41166392	28994626	29662996	38704304	27146592	29114250	38319348	33950784	30378928	26461396	27683904	17189156	36619720	41515392	28862966	22004156	24146352	20099556	31031972	30786472	28859568	24863264	26442204	18052386	22438758
3282	uracil	Nucleotide	Pyrimidine Metabolism, Uracil containing	605	LC/MS Pos Early	825	827	113.035	66-22-8	1174	C00106	HMDB00300	1310997	1604466	4362040	1537061	2441477	1574280	1152737	1665945	1787552	3146500	2706160	1477664	1340992	4706030	1784636	2662160	2085177	2185006	2394393	1819332	2801349	1604992	2287979	2.00162e+06	1075482	3259449	1862884	2194935	3227381	2930217	1741447	1662019	3816094	2639832	3826724	2568705	5178936
3202	urate	Nucleotide	Purine Metabolism, (Hypo)Xanthine/Inosine containing	1604	LC/MS Neg	1134	757.1	167.021	69-93-2;120K5305	1175	C00366	HMDB00289	79598848	65688948	70347312	47943816	95201616	68090656	46920096	75511744	65207384	61256568	81885312	75654976	55225848	97610384	65474880	59548888	78212248	83661928	53961388	71152976	67741464	62272900	65911000	70942536	51599544	56684164	59134688	67425984	70508104	71344896	58265576	70921696	50954936	67345408	39598440	39546884	71281648
344	urea	Amino Acid	Urea cycle; Arginine and Proline Metabolism	1670	LC/MS Pos Early	533	700	121.072	57-13-6	1176	C00086	HMDB00294	347600704	280318528	166808832	226496320	306914848	171759120	356400416	219275520	360618816	242198640	270388256	192312176	394125056	232591088	315687680	228051008	282864096	240044560	307457120	328037408	340506272	255251280	324358144	140043664	301561952	171040704	296504256	199495136	148680912	139838176	260513856	266848736	312544992	231696592	272601056	231175200	262108000
3281	uridine	Nucleotide	Pyrimidine Metabolism, Uracil containing	606	LC/MS Neg	535	1457.6	243.062	58-96-8	6029	C00299	HMDB00296	16590187	22280608	34877840	22926518	38562408	24135114	15058688	25487394	29005016	26615550	31738556	24294930	20353178	44227320	26820560	25768466	24952448	31385928	30829804	30435908	35091384	21416092	26815548	23829328	17529168	15868153	18202588	19249064	30558948	19167580	21476056	22334016	13249732	17479700	13025501	11509261	18822050
2584	ursodeoxycholate	Lipid	Secondary Bile Acid Metabolism	1605	LC/MS Neg	1135	5055	391.285	128-13-2	31401	C07880	HMDB00946	514419	172455	1942906	508216	232718	599562	53227	48726		1511199		163774	126711			1973588	94990	124834	27576	170018	29123	127410			126192	3283589	297677	438611	144326	914407	176144	100065	45466	1020822	1.02385e+06	75897	519291
1315	valerylglycine	Lipid	Fatty Acid Metabolism(Acyl Glycine)	36768	LC/MS Neg	100001451	2071	158.082	24003-66-5	4737557		HMDB00927	765969	992270	993085	807646	1581346	683368	631882	1330266	1806846	604379	1801406	1200328	978071	3099675	1387519	687338	848768	1479288	1448844	1243427	1765593	1158280	1496201	1746437	765472	373073	1514062	1250125	1396038	830407	1018579	1088513	1596545	1048815	980937	1118044	1528723
295	valine	Amino Acid	Leucine, Isoleucine and Valine Metabolism	1649	LC/MS Neg	566	909.4	116.072	72-18-4	6287	C00183	HMDB00883	33769456	27161230	20021572	20774072	29975018	25791964	24852316	20690912	27050252	22026932	24257710	25277838	37480336	22687844	24392984	30850666	40339136	30865838	25728752	27125936	35227592	28971106	30389624	19866942	28892138	20734692	21187338	22145942	23618472	24173716	25669712	30582464	24725338	24974648	26003812	23466124	28793970
3194	xanthine	Nucleotide	Purine Metabolism, (Hypo)Xanthine/Inosine containing	3147	LC/MS Neg	1004	910	151.026	69-89-6	1188	C00385	HMDB00292	29261	21559380	33090228	7008265	13469508	13275073	143605	11957846	23863	74533	35687952	491278	39013	42770628	16898508	21813524	16740472	29589528	36742152	26710452	3613874	180581	34246676	397466	149167	74152	6088043	188261	49872	151701	14847429	20836500	34206	80082	170862	208274	36075
3196	xanthosine	Nucleotide	Purine Metabolism, (Hypo)Xanthine/Inosine containing	15136	LC/MS Neg	100000299	1075	283.068	146-80-5	64959	C01762	HMDB00299	173728	785905	1840664	379154	2465421	1201694	238015	1591187	1054824	353243	2617674	1794334	585073	3.49952e+06	979484	1082922	1625312	2979303	662238	1216811	1483056	803830	2165114	2076338	360788	398263	648132	1332675	1095659	1189332	1061969	1388576	401472	1016352	276001	107553	416764
215	xanthurenate	Amino Acid	Tryptophan Metabolism	15679	LC/MS Pos Early	100000015	2236	206.045	59-007	5699	C02470	HMDB00881	870407	612797	653870	724342	894052	453331	1311625	1037465	1377653	636187	994689	856384	1102259	1168861	921941	352373	605121	354254	454758	1408127	636049	397241	1139961	313339	224319	375444	492934	367991	235401	346034	329927	458347	625037	645539	498567	467923	716925
905	xylose	Carbohydrate	Pentose Metabolism	15581	LC/MS Polar	826	1727	195.051	609-06-3	135191	C00181	HMDB00098	3861641	2307578	862194	1202802	1061348	1428289	1389515	1974710	2488673	5050500		1895151	2283702	2657713	1814359	847377	2218695	641795	2204188	2530176	1.62715e+06	2926308	393496	885890	1633850	3273859	1506491	4.04636e+06	147219	2156284	3.79286e+06	1903852	264199	3540851	2994790	866266	1459803
[truncated: 107 more columns]

## Sheet: ScaledImpData
												SAMPLE NAME	SFUN-00369	SFUN-00370	SFUN-00371	SFUN-00372	SFUN-00373	SFUN-00374	SFUN-00375	SFUN-00376	SFUN-00377	SFUN-00378	SFUN-00379	SFUN-00380	SFUN-00381	SFUN-00382	SFUN-00383	SFUN-00384	SFUN-00385	SFUN-00386	SFUN-00387	SFUN-00388	SFUN-00389	SFUN-00390	SFUN-00391	SFUN-00392	SFUN-00393	SFUN-00394	SFUN-00395	SFUN-00396	SFUN-00397	SFUN-00398	SFUN-00399	SFUN-00400	SFUN-00401	SFUN-00402	SFUN-00403	SFUN-00404	SFUN-00405
												PARENT SAMPLE ID	3462366	3462367	3462368	3462369	3462370	3462371	3462372	3462373	3462374	3462375	3462376	3462377	3462378	3462379	3462380	3462381	3462382	3462383	3462384	3462385	3462386	3462387	3462388	3462389	3462390	3462391	3462392	3462393	3462394	3462395	3462396	3462397	3462398	3462399	3462400	3462401	3462402
												CLIENT IDENTIFIER	1_1	2_2	3_3	4_4	5_5	6_1.1	7_2.1	8_3.1	9_4.1	10_5.1	11_1.2	12_2.2	13_3.2	14_4.2	15_5.2	16_1.3	17_2.3	18_3.3	19_4.3	20_5.3	21_1.4	22_2.4	23_3.4	24_4.4	25_5.4	26_1.5	27_2.5	28_3.5	29_4.5	30_5.5	31_6.5	32_7.5	33_1.6	34_2.6	35_3.6	36_4.6	37_5.6
												DAY POST INFECTION	0	0	0	0	0	1	1	1	1	1	2	2	2	2	2	3	3	3	3	3	4	4	4	4	4	5	5	5	5	5	5	5	6	6	6	6	6
												EDTA VOLUME	100	100	100	100	100	100	100	100	100	100	100	100	100	100	100	100	100	100	100	100	100	100	100	100	100	100	100	100	100	100	100	100	100	100	100	100	100
												GROSS BLOOD VOLUME	820	750	800	750	770	760	800	730	800	800	780	710	770	800	770	730	690	770	670	730	750	820	770	720	750	830	790	840	680	800	700	710	650	840	760	750	710
												INFECTED 1 0	0	0	0	0	0	1	1	1	1	1	1	1	1	1	1	1	1	1	1	1	1	1	1	1	1	1	1	1	1	1	0	0	1	1	1	1	1
												MOUSE	1	2	3	4	5	1.1	2.1	3.1	4.1	5.1	1.2	2.2	3.2	4.2	5.2	1.3	2.3	3.3	4.3	5.3	1.4	2.4	3.4	4.4	5.4	1.5	2.5	3.5	4.5	5.5	6.5	7.5	1.6	2.6	3.6	4.6	5.6
												NET BLOOD VOLUME	720	650	700	650	670	660	700	630	700	700	680	610	670	700	670	630	590	670	570	630	650	720	670	620	650	730	690	740	580	700	600	610	550	740	660	650	610
												NORMALIZATION	0.878	0.8667	0.875	0.8667	0.8701	0.8684	0.875	0.863	0.875	0.875	0.8718	0.8592	0.8701	0.875	0.8701	0.863	0.8551	0.8701	0.8507	0.863	0.8667	0.878	0.8701	0.8611	0.8667	0.8795	0.8734	0.881	0.8529	0.875	0.8571	0.8592	0.8462	0.881	0.8684	0.8667	0.8592
												REMAINING SERUM	210	175	200	175	185	180	200	165	200	200	190	155	185	200	185	165	145	185	135	165	175	210	185	160	175	215	195	220	140	200	150	155	125	220	180	175	155
												SAMPLE AMOUNT	approx 100 ul	approx 100 ul	approx 100 ul	approx 100 ul	approx 100 ul	approx 100 ul	approx 100 ul	approx 100 ul	approx 100 ul	approx 100 ul	approx 100 ul	approx 100 ul	approx 100 ul	approx 100 ul	approx 100 ul	approx 100 ul	approx 100 ul	approx 100 ul	approx 100 ul	approx 100 ul	approx 100 ul	approx 100 ul	approx 100 ul	approx 100 ul	approx 100 ul	approx 100 ul	approx 100 ul	approx 100 ul	approx 100 ul	approx 100 ul	approx 100 ul	approx 100 ul	approx 100 ul	approx 100 ul	approx 100 ul	approx 100 ul	approx 100 ul
												SAMPLE MATRIX	Plasma	Plasma	Plasma	Plasma	Plasma	Plasma	Plasma	Plasma	Plasma	Plasma	Plasma	Plasma	Plasma	Plasma	Plasma	Plasma	Plasma	Plasma	Plasma	Plasma	Plasma	Plasma	Plasma	Plasma	Plasma	Plasma	Plasma	Plasma	Plasma	Plasma	Plasma	Plasma	Plasma	Plasma	Plasma	Plasma	Plasma
												SAMPLE NUMBER	1	2	3	4	5	6	7	8	9	10	11	12	13	14	15	16	17	18	19	20	21	22	23	24	25	26	27	28	29	30	31	32	33	34	35	36	37
												SERUM REQUIREMENTS OTH 1	200	200	200	200	200	200	200	200	200	200	200	200	200	200	200	200	200	200	200	200	200	200	200	200	200	200	200	200	200	200	200	200	200	200	200	200	200
												SERUM VOLUME ESTIMATE 1	410	375	400	375	385	380	400	365	400	400	390	355	385	400	385	365	345	385	335	365	375	410	385	360	375	415	395	420	340	400	350	355	325	420	380	375	355
												TREATMENT	Uninfected	Uninfected	Uninfected	Uninfected	Uninfected	Infected	Infected	Infected	Infected	Infected	Infected	Infected	Infected	Infected	Infected	Infected	Infected	Infected	Infected	Infected	Infected	Infected	Infected	Infected	Infected	Infected	Infected	Infected	Infected	Infected	Uninfected	Uninfected	Infected	Infected	Infected	Infected	Infected
												VOLUME TO METABOLON	100	100	100	100	100	100	100	100	100	100	100	100	100	100	100	100	100	100	100	100	100	100	100	100	100	100	100	100	100	100	100	100	100	100	100	100	100
PATHWAY SORTORDER	BIOCHEMICAL	SUPER PATHWAY	SUB PATHWAY	COMP ID	PLATFORM	CHEMICAL ID	RI	MASS	CAS	PUBCHEM	KEGG	Group HMDB	D0	D0	D0	D0	D0	D1 Inf	D1 Inf	D1 Inf	D1 Inf	D1 Inf	D2 Inf	D2 Inf	D2 Inf	D2 Inf	D2 Inf	D3 Inf	D3 Inf	D3 Inf	D3 Inf	D3 Inf	D4 Inf	D4 Inf	D4 Inf	D4 Inf	D4 Inf	D5 Inf	D5 Inf	D5 Inf	D5 Inf	D5 Inf	D5 Non	D5 Non	D6 Inf	D6 Inf	D6 Inf	D6 Inf	D6 Inf
2098	1-(1-enyl-palmitoyl)-2-arachidonoyl-GPC (P-16:0/20:4)*	Lipid	Plasmalogen	52689	LC/MS Pos Late	100009014	2154	766.575				HMDB11220	1.6543	1.2585	1.066	2.5741	1.3423	0.8958	1.4117	1.0333	1.1556	0.9404	1.2082	1.1729	1.1889	0.8409	1.4606	0.9708	1.2773	1.2285	1.0819	1.2766	1.2201	1.0563	1.0827	0.8889	1.45	1.0599	0.8763	1.0805	0.9842	0.3133	1.4328	1.1768	0.8962	1.1993	0.9374	1	0.8178
2090	1-(1-enyl-palmitoyl)-2-arachidonoyl-GPE (P-16:0/20:4)*	Lipid	Plasmalogen	52673	LC/MS Pos Late	100009002	2270	724.528				HMDB11352	1.0985	0.9601	0.8887	1.6042	1.1558	0.923	1.1947	0.8668	1.0171	1.0078	1.0422	1.1576	1.2262	0.8256	1.1327	0.9449	0.8751	0.7801	0.9539	1.2346	1.1064	1.1168	0.8501	0.9252	1.182	1.2211	0.9765	0.9651	1.0869	0.9368	1.3561	1.0724	1.3082	1.153	1.1676	1.3801	1.2972
2099	1-(1-enyl-palmitoyl)-2-linoleoyl-GPC (P-16:0/18:2)*	Lipid	Plasmalogen	52682	LC/MS Pos Late	100009009	2226	742.575				HMDB11211	1.3734	1.3071	1.3292	1.9778	1.2335	1.4371	1.4429	1.0747	0.9991	1.6447	1.3348	1.2749	1.2008	0.8053	1.6281	2.1081	1.1492	1.3173	1.3593	1.1858	1.1354	1.5132	1.7126	1.2182	1.5998	1.9836	1.1408	1.2618	0.907	1.031	1.3626	1.2565	1.1754	1.2543	1.414	1.2797	0.8599
2087	1-(1-enyl-palmitoyl)-2-linoleoyl-GPE (P-16:0/18:2)*	Lipid	Plasmalogen	52677	LC/MS Pos Late	100009069	2351	700.528				HMDB11343	1.4292	0.9928	1.1687	2.5615	1.3166	1.3118	0.3362	0.3362	0.3362	1.3488	0.8092	1.3656	1.5023	0.7662	1.508	1.3906	1.1065	0.7596	1.0393	1.4966	1.3107	1.7245	0.7082	1.047	2.0097	1.5652	1.2187	0.78	1.3141	1.0229	1.8882	1.3736	0.8975	1.8931	1.1666	1.1889	1.0525
2092	1-(1-enyl-palmitoyl)-2-oleoyl-GPC (P-16:0/18:1)*	Lipid	Plasmalogen	52478	LC/MS Pos Late	100009007	2443	744.59					0.9506	1.1309	1.1507	1.251	1.1172	1.2719	1.2912	1.0243	1.008	0.7213	1.1806	0.9881	1.3783	0.7681	1.2575	1.0685	1.4382	1.3558	0.9902	1.7776	1.185	1.0619	1.4448	1.2485	1.2156	0.919	0.9329	1.3552	1.1787	1.3626	1.5784	1.6683	0.9712	1.2141	0.8926	1.5024	1.4569
2086	1-(1-enyl-palmitoyl)-2-oleoyl-GPE (P-16:0/18:1)*	Lipid	Plasmalogen	52477	LC/MS Pos Late	100009005	2600	702.543				HMDB11342	1.261	1.1714	0.999	1.6384	1.1385	1.0003	1.1098	1.1444	1.1317	1.4313	0.8446	1.3923	1.5017	1.0682	1.1974	1.245	0.9348	0.6783	1.5541	1.7059	1.4415	2.0271	0.933	1.0026	1.7413	1.48	1.1551	1.3587	1.4286	1.2031	1.8589	2.2491	1.1466	2.0252	1.2803	1.1112	1.4828
2088	1-(1-enyl-palmitoyl)-2-palmitoyl-GPC (P-16:0/16:0)*	Lipid	Plasmalogen	52716	LC/MS Pos Late	100009162	2454	718.575		11146967		HMDB11206	1.0395	0.9459	0.9795	1.47	1.1181	1.0779	1.0113	0.8751	1.157	1.0186	0.9487	1.0569	1.1796	1.0039	1.1022	1.0959	1.1916	1.2122	1.0301	1.0166	1.1027	1.1799	1.3715	1.0024	1.015	0.9385	1.0161	1.1804	1.1205	1.0563	1.1391	1.2619	1.2231	1.1173	1.1161	1.4179	1.3679
2114	1-(1-enyl-palmitoyl)-GPC (P-16:0)*	Lipid	Lysoplasmalogen	52474	LC/MS Pos Late	100002875	1547	480.345		10917802		HMDB10407	1.6883	0.8575	1.1764	1.567	1.3308	1.2546	1.3373	1.0327	1.2755	1.3925	1.2393	1.4248	1.2962	1.1908	1.1075	1.3119	1.4747	0.839	1.0055	1.2328	0.9451	1.1551	0.9189	0.7864	1.1576	1.0223	0.9983	1.1087	1.0927	0.8169	1.0436	1.1113	0.9532	1.2401	0.9774	1.0795	1.231
2115	1-(1-enyl-palmitoyl)-GPE (P-16:0)*	Lipid	Lysoplasmalogen	39270	LC/MS Pos Late	100003000	1558	438.298					0.9407	0.7723	1.3986	1.1932	0.857	0.7694	1.0529	0.7546	0.7763	0.8994	0.7921	0.8956	1.1829	0.7007	0.774	0.899	0.694	0.6133	0.7505	0.9008	0.8121	0.9753	0.5911	0.574	1.0875	1.5814	0.7776	0.9273	1.15	0.9735	0.8501	0.9278	1.2298	1.4034	1.1717	1.5753	1.0128
2102	1-(1-enyl-stearoyl)-2-arachidonoyl-GPE (P-18:0/20:4)*	Lipid	Plasmalogen	52475	LC/MS Pos Late	100008999	2511	752.559		9547058		HMDB05779	1.2314	1.0859	0.8236	1.8584	1.3364	1.2003	1.3072	0.8599	1.2123	0.9008	1.1716	1.0742	1.3566	0.9659	1.154	0.8086	0.8948	0.9255	0.9175	1.0009	1.1228	1.2761	0.773	0.8649	1.0902	1.1863	1.053	0.987	1.225	1.1303	1.3214	1.0719	1.2005	1.5024	0.9946	1.6116	1.3396
2095	1-(1-enyl-stearoyl)-2-linoleoyl-GPE (P-18:0/18:2)*	Lipid	Plasmalogen	52748	LC/MS Pos Late	100009225	2633	728.559				HMDB11376	1.5839	1.0456	1.0407	2.0932	1.2666	1.5501	1.4614	1.0033	1.0273	1.3866	1.3328	1.1922	1.7371	0.8767	1.1851	1.3354	1.0495	0.9255	1.0953	1.2806	1.2399	1.7961	0.9169	0.9481	1.3724	1.4869	0.9977	1.2271	1.0023	1.084	1.3863	1.4672	1.0788	1.7966	1.1766	1.4725	1.2905
2119	1-(1-enyl-stearoyl)-GPE (P-18:0)*	Lipid	Lysoplasmalogen	39271	LC/MS Neg	100003001	6500	464.315					1.4712	0.5711	0.946	1.377	1.1537	0.7681	1.1991	1.2325	1.1517	1.5216	1.0136	0.979	1.0191	1.2718	0.8492	0.3898	0.6425	0.7115	0.732	0.6053	0.9621	0.6347	0.5316	0.4012	0.9894	0.7891	0.9748	0.9775	1.4004	0.7669	0.9101	0.586	1.0983	1.7795	1.6636	1.1896	0.9923
4495	1,2,3-benzenetriol sulfate (2)	Xenobiotics	Chemical	48762	LC/MS Neg	100006374	1709	204.981					0.6626	8.1325	0.3471	0.3216	0.7744	0.3595	0.5449	1.1929	2.761	1.859	1.4432	0.7052	4.4111	1.0221	1.4908	0.8801	0.4448	0.6457	0.6464	1.5681	1.7169	0.8077	0.8614	0.1535	1.5209	0.7707	2.7281	1.2729	0.4615	0.5203	1.5585	0.5766	1.0512	4.8776	2.5392	1.0403	1.3119
1717	1,2-dilinoleoyl-GPC (18:2/18:2)	Lipid	Phosphatidylcholine (PC)	52603	LC/MS Pos Late	100008903	2006	782.569	998-06-1	5288075		HMDB08138	1.2303	1.0744	0.8677	1.1509	1.0476	1.3653	1.464	1.0614	1.3036	1.7269	1.2254	1.1053	1.1082	0.9245	1.1298	1.4511	0.8513	0.8367	1.0362	0.957	0.8025	1.0986	1.1249	0.8726	1.0851	1.0537	1.154	1.1152	0.7495	0.7165	0.9632	1.0019	1.1626	1.021	1.0867	1.1939	0.612
1630	1,2-dipalmitoyl-GPC (16:0/16:0)	Lipid	Phosphatidylcholine (PC)	19130	LC/MS Pos Late	100000657	2365	734.569	63-89-8	452110	D03585	HMDB00564	0.6854	0.6944	0.7157	1.0374	0.8662	0.9103	0.8433	0.7542	0.9103	0.8909	0.8344	0.7258	0.8979	0.822	0.8043	0.8963	0.8651	0.7146	0.7849	0.8423	0.9228	0.901	0.8004	0.7855	0.8045	1.0208	0.8063	0.8089	1.1739	0.9526	0.9203	0.9906	1.0673	1.0794	0.988	1.1782	1.2424
1749	1,2-dipalmitoyl-GPE (16:0/16:0)*	Lipid	Phosphatidylethanolamine (PE)	57341	LC/MS Pos Late	100009204	2498	692.522		445468		HMDB08923	0.3286	0.3286	0.3286	0.3286	0.544	0.3286	0.9629	0.6321	1.0128	0.8294	1.244	1.1484	1.8742	1.2576	0.9489	1.2455	0.4226	0.3286	1.9811	1.4596	0.8257	1.586	1.1936	1.1411	1.0129	1.8746	0.8642	0.5787	1.654	1.5199	2.2006	1.7169	1.9121	1.7331	1.5681	1.686	2.5374
862	1,5-anhydroglucitol (1,5-AG)	Carbohydrate	Glycolysis, Gluconeogenesis, and Pyruvate Metabolism	20675	LC/MS Neg	100000580	802	163.061	154-58-5	64960	C07326	HMDB02712	0.8197	1.1052	0.7319	0.9915	1.0144	0.5909	0.7813	0.9808	0.798	0.6457	1.1244	1.0199	1.1835	1.0789	1.1194	0.8059	0.9106	1.0604	1.0348	1.0185	1.0776	1.2521	1.268	0.8882	1.1721	0.4896	0.9706	1.0934	1.042	0.9554	1.0251	1.1096	1.0271	1.0182	0.8688	1.0134	0.8562
1112	10-heptadecenoate (17:1n7)	Lipid	Long Chain Fatty Acid	33971	LC/MS Neg	100001278	5555	267.233	29743-97-3	5312435		HMDB60038	1.3176	1.3862	0.7518	1.7362	1.2213	1.2813	0.8943	0.8117	1.0558	0.7106	1.1073	1.093	1.5677	1.06	0.7592	1.466	1.3112	1.1549	0.8229	1.0568	1.1431	0.8781	1.5951	1.1352	1.7392	0.9138	1.0526	0.8729	1.1252	1.319	1.0025	0.8751	1.3253	2.242	1.5354	1.8584	2.6228
1123	10-nonadecenoate (19:1n9)	Lipid	Long Chain Fatty Acid	33972	LC/MS Neg	100001277	5780	295.264	73033-09-7	5312513		HMDB13622	0.9091	1.3295	0.9791	1.9204	1.3831	1.4626	1.2376	1.0661	0.9809	1.0642	1.118	1.1141	1.6334	1.0325	1.0439	1.4469	1.1805	1.0813	0.8944	1.3541	0.9799	0.7318	1.5086	0.9073	2.0506	0.9755	0.9612	0.9396	1.0311	1.1914	0.9496	0.7454	1.2337	2.5808	1.2988	1.7717	2.3493
1099	10-undecenoate (11:1n1)	Lipid	Medium Chain Fatty Acid	32497	LC/MS Neg	100001197	5085.8	183.139	1333-28-4	14891	C13910	HMDB33724	0.8571	1.0128	2.0562	1.1125	1.0087	1.2097	0.532	0.8216	1.8769	0.7175	0.6673	1.0567	0.6922	0.8674	1.0208	0.9048	1.3187	1.0241	0.4297	0.7127	1.013	0.8415	0.9313	0.7003	0.6955	1.2463	1.3582	1.4387	1.0325	1.3344	0.819	1.0623	1.2382	1.8893	0.9216	1.273	1.3651
1443	12,13-DiHOME	Lipid	Fatty Acid, Dihydroxy	38395	LC/MS Neg	62	5137	313.238	263399-35-5	10236635	C14829	HMDB04705	0.8027	0.756	1.7528	1.2649	1.0041	1.4813	0.617	0.7902	1.0216	1.2258	0.8729	0.794	1.0196	1.157	0.8357	2.4951	0.8192	1.1122	0.8259	0.9082	1.2113	0.8077	2.2844	1.2358	1.1862	1.5768	1.361	0.9631	0.8769	0.8891	1.2399	0.7952	1.2342	1.5813	0.9559	1.8129	1.8867
1519	12-HETE	Lipid	Eicosanoid	37536	LC/MS Neg	100002167	5326	319.228	71030-37-0;73837-14-6	5312983		HMDB06111	1.7429	1.6833	0.6971	2.8597	1.6228	1.3506	1.1489	0.8509	1.6393	0.4434	0.7747	1.9225	3.8516	1.7778	0.6304	1.1866	1.3599	1.4865	1.2464	0.7602	1.0785	0.518	1.444	1.0543	1.7356	3.2669	1.3124	0.2346	1.6662	1.6773	2.2679	0.875	1.003	2.3754	0.4757	1.2156	8.2214
1423	13-HODE + 9-HODE	Lipid	Fatty Acid, Monohydroxy	37752	LC/MS Neg	100002196	5275	295.228		43013			0.6052	1.2832	0.9821	0.9604	1.0379	1.5412	0.9923	1.3576	0.7939	0.8765	1.1438	0.7747	2.1225	0.8187	0.5924	1.9939	0.8013	0.9427	1.3999	1.9791	0.994	1.1857	2.6076	0.9389	1.3035	0.6702	0.7449	0.4854	0.9268	0.7432	0.7871	0.583	1.7553	0.9717	1.5546	1.8041	2.0409
1419	16-hydroxypalmitate	Lipid	Fatty Acid, Monohydroxy	39609	LC/MS Neg	100002953	5236.2	271.228	506-13-8	10466	C18218	HMDB06294	0.9619	0.9629	1.2639	1.1733	0.9586	1.5513	1.3195	0.9672	1.0279	1.084	1.6598	1.0279	1.5504	1.0081	0.8014	1.787	1.1751	1.3295	1.0471	1.0695	1.2013	1.108	2.1132	1.0714	1.0318	1.0074	1.0022	0.8069	0.9579	1.0467	1.1977	0.7618	0.6791	1.3264	0.77	1.2653	1.9092
1221	17-methylstearate	Lipid	Fatty Acid, Branched	38296	LC/MS Neg	100002356	5993	297.28	2724-59-6	3083779		HMDB37397	1.0616	1.2861	1.0285	1.7504	1.3661	1.0252	0.9996	1.3736	0.8284	1.2791	1.1317	1.3128	1.3525	0.9651	1.2802	1.1882	1.1345	0.8416	1.1011	1.4698	1.3869	0.7735	1.3032	1.0149	1.6146	0.9238	1.107	1.2322	1.1261	1.1666	1.2538	1.0073	1.5401	1.9973	1.1419	1.5056	1.9837
1935	1-arachidonoyl-GPC (20:4n6)*	Lipid	Lysophospholipid	33228	LC/MS Pos Late	100001551	1460	544.34			C05208	HMDB10395	1.2434	0.9399	1.3113	1.3412	1.2602	0.8741	1.0954	0.9525	1.2174	0.8515	0.8749	1.3053	1.1151	1.0918	1.0093	0.8323	1.2426	0.9163	0.9806	1.0591	1.078	1.0969	0.7048	0.7169	1.077	1.0435	1.0799	0.9671	1.3337	1.0747	0.9994	1.1465	1.022	1.1658	1.0382	0.9498	0.8347
1967	1-arachidonoyl-GPE (20:4n6)*	Lipid	Lysophospholipid	35186	LC/MS Pos Late	100001571	1470	502.293		42607465		HMDB11517	1.5384	1.3046	0.836	0.9429	1.5207	1.0496	1.2075	1.1558	1.3677	0.755	1.0533	1.2629	1.8992	1.0904	0.9379	0.855	1.2374	1.101	1.124	1.6393	1.2418	1.3453	0.7145	1.1152	2.0117	0.7937	0.9137	0.91	1.5358	1.2193	0.9831	1.1598	1.8615	1.4883	1.3591	1.4658	1.457
1998	1-arachidonoyl-GPI (20:4)*	Lipid	Lysophospholipid	34214	LC/MS Neg	100001654	5482	619.289				HMDB61690	1.4557	1.3587	0.4717	1.413	1.2311	0.9062	0.9345	1.0605	1.8576	0.6111	1.1299	1.16	1.9653	0.8989	0.8372	0.8864	1.3001	1.1726	0.8621	1.1377	1.1934	1.2045	0.8492	0.9606	1.5782	0.7275	1.0158	0.9034	1.3753	1.1812	0.7074	1.055	1.3417	1.6638	1.25	1.3736	1.1211
2146	1-arachidonylglycerol (20:4)	Lipid	Monoacylglycerol	34397	LC/MS Neg	100001433	6250	303.233	35474-99-8	5282281	C13857	HMDB11549	0.7102	0.6486	1.6839	1.0468	0.8144	0.649	0.7649	1.2799	0.2968	1.9724	0.4956	1.0866	0.422	0.5597	0.7026	1.5673	0.3846	0.7749	0.9347	0.984	0.3021	0.5836	0.8476	1.0559	0.5768	1.6922	1.0556	1.0224	0.4241	1.2764	0.8675	0.5242	1.1902	1.3803	1.2446	0.9903	0.8536
2145	1-dihomo-linolenylglycerol (20:3)	Lipid	Monoacylglycerol	48341	LC/MS Neg	100006121	6400	305.249					0.6854	0.8565	1.4188	0.9919	0.8608	0.5298	0.8694	1.5092	0.1776	1.3596	0.7165	1.4197	0.8709	1.0336	0.6563	1.5904	0.3651	0.9761	1.1231	1.4343	0.1776	0.7715	0.8596	1.0988	0.9075	1.1172	1.0195	1.3308	0.9496	1.4158	0.8009	0.5565	1.7884	1.9777	2.137	1.1832	0.6033
2149	1-docosahexaenoylglycerol (22:6)	Lipid	Monoacylglycerol	35153	LC/MS Neg	100001481	6150	309.222				HMDB11587	0.1791	0.6229	1.1347	0.7154	0.4032	0.5511	0.2673	0.9476	0.1791	0.7842	0.3207	0.9166	0.1791	0.6086	0.1791	1.0101	0.1791	0.745	0.6159	0.826	0.1791	0.4733	0.7484	0.7933	0.499	1.0104	0.6059	1.0049	0.7735	1.326	0.6424	0.4058	1.0723	1.6829	0.9552	0.898	0.6751
1946	1-lignoceroyl-GPC (24:0)	Lipid	Lysophospholipid	49617	LC/MS Pos Late	100002873	1907	608.465	325171-59-3			HMDB10405	1.3858	0.8819	0.9531	1.2362	1.1641	1.1098	1.3631	1.0318	1.0138	0.9206	1.2952	1.2745	1.3321	1.023	1.0525	1.0469	1.2091	1.0236	0.9733	0.9959	0.9309	1.2791	1.108	0.8208	0.9479	0.8896	0.9305	1.054	1.2874	0.9357	0.9681	1.1291	1.0136	1.3694	0.8634	1.3522	0.9338
2142	1-linolenoylglycerol (18:3)	Lipid	Monoacylglycerol	34393	LC/MS Neg	100001435	6214	277.217	124151-74-2	53480978		HMDB11569	1.6604	1.3673	0.7948	1.1539	1.7161	1.0936	1.6248	2.4369	1.1358	1.7292	1.1025	1.7351	1.5606	1.9324	1.0995	1.063	0.8272	0.9362	0.9399	1.5101	0.8285	0.7004	0.8905	1.1364	1.6177	0.7016	0.9791	0.8623	1.4769	1.7458	0.9615	0.79	3.4047	3.0652	2.7703	2.8188	1.5183
1921	1-linolenoyl-GPC (18:3)*	Lipid	Lysophospholipid	45951	LC/MS Pos Late	100005350	1422	518.324				HMDB10388	1.896	1.265	1.9379	0.929	1.5153	1.9869	1.4292	1.2978	1.7167	2.7624	1.6357	1.3269	1.3074	1.6419	1.191	2.0784	1.7062	1.0344	1.0598	1.3949	1.123	1.4581	0.9277	0.8484	1.205	1.3422	1.3019	1.4324	1.338	1.6054	0.8918	1.0264	1.3184	1.53	1.5245	1.485	1.5764
1733	1-linoleoyl-2-arachidonoyl-GPC (18:2/20:4n6)*	Lipid	Phosphatidylcholine (PC)	52710	LC/MS Pos Late	100009131	1969	806.569				HMDB08147	1.4042	1.2873	1.0184	1.3624	1.2908	1.0579	1.4305	1.0861	1.1582	0.7751	1.1159	1.5128	1.3123	1.1736	1.0718	1.0246	1.1139	1.1464	0.9952	1.199	0.8277	1.3451	0.8824	0.9315	1.1597	0.5994	1.1384	1.0138	0.7616	1.0178	1.0285	1.1985	0.8557	1.218	0.7961	1.0201	0.68
1799	1-linoleoyl-2-arachidonoyl-GPE (18:2/20:4)*	Lipid	Phosphatidylethanolamine (PE)	53189	LC/MS Pos Late	100009222	2030	764.522				HMDB09102	0.8209	0.7936	0.5645	1.2509	0.8602	1.3254	1.2938	1.1689	1.3824	1.4926	1.5293	1.0934	1.8729	1.2914	1.3869	1.8106	1.1571	0.8759	2.0812	1.4287	1.4745	2.015	1.6042	1.5425	1.5188	2.5417	1.2775	0.971	1.2475	1.5157	1.859	1.9149	1.718	1.5423	1.3787	1.7831	1.7456
1718	1-linoleoyl-2-linolenoyl-GPC (18:2/18:3)*	Lipid	Phosphatidylcholine (PC)	53176	LC/MS Pos Late	100009343	1939	780.554				HMDB08141	1.4473	0.975	0.6341	1.0281	1.0889	1.1553	1.3959	0.8389	1.1692	1.3447	1.0409	1.096	1.1005	1.0465	1.0316	1.0812	0.8054	0.638	0.6765	0.7157	0.8372	1.0003	0.8665	0.7576	1.0395	0.7979	1.0469	0.9952	0.6153	0.5464	0.9356	1.0901	1.0782	1.0717	0.978	1.3244	0.5801
2141	1-linoleoylglycerol (18:2)	Lipid	Monoacylglycerol	27447	LC/MS Neg	100001040	6477	279.233	2277-28-3	5283469			0.9385	1.1563	0.9296	1.2481	1.3739	0.7968	0.7713	1.5094	1.0033	1.4461	0.7684	1.4853	1.5788	1.5235	0.871	1.1814	0.6549	0.9576	0.8945	1.5296	0.7852	0.5981	0.8755	1.0277	1.3929	0.9167	1.1659	1.2777	1.4793	1.6409	1.0639	0.979	3.6149	2.3891	3.1099	2.0021	1.1842
1919	1-linoleoyl-GPC (18:2)	Lipid	Lysophospholipid	34419	LC/MS Pos Late	100001395	1465	520.34		11988421	C04100	HMDB10386	1.3797	1.197	1.1721	1.0665	1.0042	1.5404	1.5435	1.2598	1.2096	1.4259	1.0447	1.3299	1.1334	1.1857	1.1897	1.0709	1.0852	0.7718	1.0221	1.2576	0.9316	1.0033	0.8261	0.9667	1.0917	1.219	0.8905	1.2218	0.9967	1.1616	0.8684	1.0038	1.1252	1.3342	0.897	0.9793	1.0681
1960	1-linoleoyl-GPE (18:2)*	Lipid	Lysophospholipid	36600	LC/MS Pos Late	100001570	1482	478.293		52925130		HMDB11507	1.3702	1.3861	1.1586	0.9817	1.6186	1.5603	1.137	1.2513	1.1861	2.0948	1.266	0.8747	2.0599	0.9414	1.2104	1.6742	1.1165	0.6104	1.2118	1.5304	1.4029	0.9914	0.7791	0.8721	1.4865	1.1445	1.2122	0.9774	1.1249	0.9628	0.6782	0.9581	1.7593	1.6557	1.7663	1.1896	1.1739
1986	1-linoleoyl-GPG (18:2)*	Lipid	Lysophospholipid	54885	LC/MS Neg	100009227	5516	507.273					1.0997	1.0156	0.6287	0.9146	1.1311	0.972	1.2291	0.9155	1.5445	1.7371	0.9927	0.8406	1.2328	1.1133	0.67	1.3003	0.8086	0.5915	0.5824	0.7756	0.9989	0.7241	0.863	0.8004	1.3419	0.9399	0.7876	0.6855	0.8714	0.7311	0.592	0.7365	1.2577	1.4152	1.4777	1.2117	0.8815
1994	1-linoleoyl-GPI (18:2)*	Lipid	Lysophospholipid	36594	LC/MS Neg	100001778	5494	595.289					1.4909	1.316	0.6123	1.3393	1.5301	1.6304	1.6039	1.3443	2.7637	1.5212	1.5265	1.2178	2.3155	0.9387	1.1236	2.1221	1.4638	0.9382	1.0093	0.9575	1.2035	1.2693	1.4681	0.907	2.0479	0.9718	1.1898	1.1396	1.0488	0.927	0.6402	1.1992	1.6062	1.6557	1.7288	1.6655	0.863
3221	N1-methyladenosine	Nucleotide	Purine Metabolism, Adenine containing	15650	LC/MS Pos Early	1242	2120	282.12	15763-06-1	27476	C02494	HMDB03331	0.905	0.6626	0.8518	1.0955	1.0394	0.8351	0.7562	0.8666	0.7329	0.589	0.8772	1.088	0.8847	1.0745	0.8989	0.9387	1.0765	1.131	1.0102	0.8179	1.3269	1.0371	0.9572	0.7483	0.8817	0.9476	0.9215	0.9257	0.8917	1.0571	1.0058	1.1591	0.9011	0.9875	0.769	0.7829	1.0618
75	1-methylhistamine	Amino Acid	Histidine Metabolism	43831	LC/MS Pos Early	100001204	3040	126.103	501-75-7	3614	C05127	HMDB00898	1.0391	0.8002	1.1808	1.2291	1.1153	0.8551	1.1054	0.9638	0.7668	0.6702	1.0715	1.216	1.365	1.6605	1.4864	0.8549	0.8379	0.9776	1.9895	1.1139	1.2885	1.347	1.749	1.1728	0.9493	1.3791	1.3158	1.0904	1.2831	1.0861	1.2414	1.0074	1.0247	0.9284	1.2966	1.2032	2.1458
62	1-methylhistidine	Amino Acid	Histidine Metabolism	30460	LC/MS Neg	100001051	1227	168.078	332-80-9	92105	C01152	HMDB00001	0.5152	0.8292	0.4755	1.316	1.2685	0.3943	0.2279	0.665	0.3734	0.2279	0.6707	0.9869	0.7952	0.7453	0.6323	0.6119	0.9977	0.9233	0.5463	0.8672	0.5206	0.6699	0.6892	0.6719	0.6769	0.4817	0.6978	0.999	1.5082	1.1269	0.7383	0.7737	1.2728	0.994	1.2308	1.0764	1.9151
76	1-methylimidazoleacetate	Amino Acid	Histidine Metabolism	32350	LC/MS Pos Early	100001208	2064	141.066	2625-49-2	75810	C05828	HMDB02820	0.753	0.7856	0.7791	1.0044	1.0728	0.7765	1.0914	0.6695	1.0814	0.6546	0.8417	0.8279	1.0775	0.9688	0.9557	0.8766	0.7548	0.6242	1.0399	0.6298	1.0242	0.5554	0.8769	0.573	0.6883	1.0219	0.6533	0.8301	0.9246	1.0145	0.5801	0.9949	0.9062	1.0551	0.6001	0.9582	2.0356
3352	1-methylnicotinamide	Cofactors and Vitamins	Nicotinate and Nicotinamide Metabolism	27665	LC/MS Pos Early	55	1940	137.071	1005-24-9	10129985	C02918	HMDB00699	2.2928	1.3482	1.4039	1.1417	1.0759	1.7756	1.2866	1.0082	2.586	0.831	2.9172	1.9114	2.1295	1.6483	1.7881	0.9962	0.925	1.4086	1.7539	1.305	1.6676	2.0425	0.654	3.1416	3.2841	1.4134	1.9349	1.854	1.3041	1.9264	2.5972	1.2595	1.0822	1.4625	1.3363	1.448	1.7113
1792	1-oleoyl-2-arachidonoyl-GPE (18:1/20:4)*	Lipid	Phosphatidylethanolamine (PE)	55041	LC/MS Pos Late	100009219	2200	766.538				HMDB09069	0.9949	0.8021	0.7837	0.9959	0.7204	1.0105	1.2469	0.9782	0.8335	0.8286	1.189	1.0716	1.3356	1.1186	0.9781	1.0126	0.7194	0.9441	1.2548	1.1285	1.0234	1.4626	0.9345	1.1626	1.3524	1.1966	1.0457	0.9085	0.9058	1.1497	1.1785	1.125	1.0992	1.1968	1.0378	1.0752	1.0699
1889	1-oleoyl-2-arachidonoyl-GPI (18:1/20:4) *	Lipid	Phosphatidylinositol (PI)	54994	LC/MS Pos Late	100010951	2568	902.575				HMDB09844	0.8852	1.2981	1.7112	1.1842	0.9058	1.2405	1.0751	0.9672	0.7773	0.9856	1.3801	1.4363	1.2276	0.7169	0.8532	1.2564	1.2854	1.0396	1.0154	1.8021	0.7933	1.323	0.7687	1.1312	0.9854	1.2791	0.8968	0.7913	0.6191	0.9978	0.6949	1.1901	0.6243	0.9138	0.8338	0.691	0.6386
1715	1-oleoyl-2-linoleoyl-GPC (18:1/18:2)*	Lipid	Phosphatidylcholine (PC)	52453	LC/MS Pos Late	100008981	2165	784.585					1.3138	1.4291	1.2352	1.3261	1.201	1.243	1.0656	1.0501	1.0244	1.1617	0.9754	1.2743	1.4088	0.9015	1.1136	1.25	1.1156	1.0306	1.1836	1.3753	1.0934	1.2138	0.8526	0.9169	1.2268	1.1125	0.9941	1.0847	0.9843	1.0004	1.2384	1.3435	1.098	0.9567	1.2288	0.767	0.7581
1782	1-oleoyl-2-linoleoyl-GPE (18:1/18:2)*	Lipid	Phosphatidylethanolamine (PE)	52687	LC/MS Pos Late	100009078	2270	742.538		9546753		HMDB05349	1.1803	0.8553	1.0286	0.931	0.8349	1.3198	1.5391	0.8922	0.9555	1.7077	1.2608	0.8701	1.2807	0.8489	0.8835	1.5814	0.634	0.611	1.0336	1.0469	0.9446	1.002	1.0272	0.8744	1.1178	1.2232	1.0006	0.8885	0.6602	0.8043	1.0259	0.9062	1.1677	1.0985	1.1932	0.8898	0.868
2140	1-oleoylglycerol (18:1)	Lipid	Monoacylglycerol	21184	LC/MS Neg	100000924	6650	281.249	111-03-5	5283468		HMDB11567	1.3379	1.5106	0.7072	1.2521	1.3997	0.7767	1.4729	1.867	0.8699	1.2189	1.0401	1.7422	2.4061	1.403	0.309	1	0.6469	1.0835	1.3805	2.2142	0.5463	0.9566	0.7629	1.1695	2.2371	0.9421	1.087	1.1492	1.6239	1.7332	0.9562	0.8439	3.5582	2.2051	3.9908	1.8806	1.2163
1916	1-oleoyl-GPC (18:1)	Lipid	Lysophospholipid	48258	LC/MS Pos Late	100001272	1540	522.355	19420-56-5	16081932		HMDB02815	1.0549	1.1645	1.1494	0.9587	1.1102	1.1935	1.2674	1.1179	0.9501	1.0739	1.3006	1.1885	1.3975	0.9343	0.9909	0.9774	1.247	1.1654	1.1989	1.2778	1.0565	1.5599	0.7814	1.0989	1.21	1.0059	1.0265	0.9436	1.0227	1.1846	0.7353	1.0789	0.9937	1.1331	1.1487	0.8702	0.9056
1958	1-oleoyl-GPE (18:1)	Lipid	Lysophospholipid	35628	LC/MS Pos Late	100001569	1554	480.308	89576-29-4	9547071		HMDB11506	1.2505	1.185	1.1045	1.1292	1.0865	1.0377	1.2831	0.9252	0.9425	1.2602	1.1079	1.1381	1.518	0.7013	0.9042	1.3385	0.9437	0.8141	0.9989	1.1975	1.0011	1.1851	0.6479	0.806	1.4742	1.1636	0.9402	0.8758	0.9189	0.8442	0.8513	1.098	1.273	1.2231	1.3497	1.0319	0.9221
1660	1-palmitoleoyl-2-linolenoyl-GPC (16:1/18:3)*	Lipid	Phosphatidylcholine (PC)	53180	LC/MS Pos Late	100009345	1850	754.538				HMDB08008	1.0483	1.6356	0.7067	0.6076	1.1701	1.2574	1.2889	1.0822	0.6539	0.886	1.3576	1.4771	1.5527	1.0981	0.9895	1.4673	1.1733	1.133	0.7358	1.2067	1.1722	1.4437	0.8615	1.3324	1.1386	0.6208	1.0466	1.1902	0.9849	1.6207	0.8725	1.1993	0.8102	1.4349	0.9488	1.4468	1.398
2137	1-palmitoleoylglycerol (16:1)*	Lipid	Monoacylglycerol	52431	LC/MS Neg	100008952	6094	253.217				HMDB11565	1.1786	2.3883	0.8616	0.9062	1.5539	1.3657	2.0603	2.7842	0.2667	1.5859	1.708	1.2658	3.1937	1.3996	1.1079	2.0185	1.2758	2.0427	1.4284	3.1837	0.638	1.6236	1.46	2.0986	2.3361	1.274	1.3202	0.7571	1.6087	2.879	1.4502	0.949	4.0222	2.091	3.7194	1.99	2.2699
1909	1-palmitoleoyl-GPC (16:1)*	Lipid	Lysophospholipid	33230	LC/MS Pos Late	100001511	1450	494.324		24779461		HMDB10383	0.9957	1.249	1.2797	0.9472	1.1918	1.3093	1.2108	1.2326	0.7985	1.2041	1.3934	1.1927	1.5836	0.94	0.9935	1.5091	1.5388	1.3876	1.107	1.6772	1.1602	1.6372	0.7352	1.2329	1.301	0.9917	0.9099	0.7976	1.3548	1.319	0.7975	1.0399	0.9584	1.0278	1.1906	0.9283	1.235
1673	1-palmitoyl-2-arachidonoyl-GPC (16:0/20:4n6)	Lipid	Phosphatidylcholine (PC)	52462	LC/MS Pos Late	100008914	2091	782.569	35418-58-7	10747814		HMDB07982	1.0739	0.9434	1.0583	1.1752	0.9991	0.8098	1.1215	0.9345	0.9742	0.6608	0.9822	1.0826	1.0214	0.9737	0.9947	0.7176	0.9553	0.8859	0.8029	0.9311	0.9963	0.9783	0.7501	0.7746	0.9994	0.7573	0.8924	0.9929	1.1449	0.9667	0.9798	0.859	1.0336	1.1963	0.9151	1.1055	0.8863
1767	1-palmitoyl-2-arachidonoyl-GPE (16:0/20:4)*	Lipid	Phosphatidylethanolamine (PE)	52464	LC/MS Pos Late	100008990	2198	740.522		9546800		HMDB05323	1.1914	0.8732	0.8598	0.9588	0.8731	1.0669	1.6682	1.0096	0.9783	0.8692	1.5552	1.0242	1.286	1.0347	1.1005	0.8489	0.6598	0.9705	1.0292	1.0851	0.9055	1.4731	0.8987	0.9091	1.3381	1.064	0.9787	0.95	0.8322	1.086	1.0419	0.7942	1.1416	1.3574	1.1696	1.3233	1.2024
1861	1-palmitoyl-2-arachidonoyl-GPI (16:0/20:4)*	Lipid	Phosphatidylinositol (PI)	52467	LC/MS Pos Late	100008993	2567	876.56				HMDB09789	0.8998	0.8802	1.0977	1.001	1.1221	0.9671	1.5141	1.1048	1.1018	0.8355	1.9284	1.0901	1.3638	0.8887	0.8287	0.7676	0.7524	1.031	0.7733	1.1787	0.921	1.4229	0.6131	1.0377	1.0633	0.8305	0.7954	0.8629	0.8956	0.977	0.7871	0.7026	0.8702	1.1726	0.9612	0.9924	0.7603
1650	1-palmitoyl-2-gamma-linolenoyl-GPC (16:0/18:3n6)*	Lipid	Phosphatidylcholine (PC)	54812	LC/MS Pos Late	100009154	2034	756.554				HMDB07974	1.2686	0.914	1.4691	1.0386	1.2434	1.2137	1.7855	1.2115	1.392	0.966	1.9554	1.176	1.3094	1.2826	1.3156	1.1535	1.0668	1.1326	0.9916	1.3312	0.9458	1.318	1.1761	1.0447	1.2123	1.0569	1.0787	1.1948	1.1496	1.4023	0.9139	0.9009	1.3028	1.6139	1.3454	1.9584	1.3762
1646	1-palmitoyl-2-linoleoyl-GPC (16:0/18:2)	Lipid	Phosphatidylcholine (PC)	42446	LC/MS Pos Late	1537	2160	758.569	40811-94-7	5287971		HMDB07973	1.1461	0.9779	0.8825	1.1438	1.064	1.0977	1.2088	0.9772	1.1089	1.0161	1.1965	0.9799	1.1992	0.9606	1.0102	0.9386	0.8813	0.8574	0.8418	1.0295	0.9758	1.0828	0.9069	0.8467	1.0852	0.8223	0.9724	0.9974	1.0522	0.8491	0.9526	0.9335	1.0704	1.2025	1.0228	1.1215	0.9373
1758	1-palmitoyl-2-linoleoyl-GPE (16:0/18:2)	Lipid	Phosphatidylethanolamine (PE)	42449	LC/MS Pos Late	100001870	2275	716.522		9546747		HMDB05322	1.2843	0.7338	0.8869	0.8427	0.889	1.3262	1.8039	0.9383	1.0487	1.8781	1.6603	0.8076	1.382	0.8106	1.0675	1.4113	0.5694	0.656	0.8029	0.9474	0.8804	1.0321	1.0265	0.7061	1.1221	0.9841	0.9615	0.9096	0.576	0.7563	0.8496	0.6411	1.3263	1.1235	1.3214	1.2449	0.9886
1856	1-palmitoyl-2-linoleoyl-GPI (16:0/18:2)	Lipid	Phosphatidylinositol (PI)	52450	LC/MS Pos Late	1528	2730	852.56				HMDB09784	1.1317	0.7598	1.0011	1.2646	1.2199	1.5575	1.7388	1.1208	1.0738	1.5266	1.7765	1.2802	1.3338	0.9303	1.18	1.5136	0.791	0.6839	0.884	1.0901	0.8184	1.2025	1.1425	1.0228	0.9082	0.9815	0.9836	0.8522	0.9823	0.7386	0.7812	0.8549	1.1951	1.3433	1.0997	1.5101	0.699
1639	1-palmitoyl-2-oleoyl-GPC (16:0/18:1)	Lipid	Phosphatidylcholine (PC)	52461	LC/MS Pos Late	1539	2358	760.585	26853-31-6;26853-31-6	6436017		HMDB07972	0.9048	1.012	0.8384	0.8057	1.0334	1.0372	1.1953	1.0367	0.8433	0.8103	1.4072	0.9287	1.2529	0.8116	0.8619	0.7861	0.967	1.071	0.9422	1.1823	0.881	1.4623	0.7645	1.0885	1.1552	0.8173	0.8895	0.8366	1.0504	1.0919	0.7642	0.7744	0.9448	0.9233	1.1439	1.0472	1.07
1757	1-palmitoyl-2-oleoyl-GPE (16:0/18:1)	Lipid	Phosphatidylethanolamine (PE)	19263	LC/MS Pos Late	1526	2509	718.538	26662-94-2	5283496		HMDB05320	0.7773	0.8685	0.7753	0.9105	0.8758	1.2829	1.6702	1.1346	1.1052	1.4607	1.5808	1.0882	1.541	0.9953	0.9712	1.558	0.6727	0.8882	1.4198	1.405	1.0828	1.5457	1.2259	1.1987	1.431	1.7027	1.0725	0.7362	1.1843	1.3065	1.2645	1.1376	1.4416	1.3519	1.3677	1.2848	1.5936
1631	1-palmitoyl-2-palmitoleoyl-GPC (16:0/16:1)*	Lipid	Phosphatidylcholine (PC)	52470	LC/MS Pos Late	100008984	2160	732.554				HMDB07969	0.6946	1.1136	1.1336	0.7958	0.8661	1.0918	1.2866	1.1347	0.5344	0.9285	1.7712	0.9205	1.365	0.7637	0.9699	1.2472	0.9318	1.1748	0.8925	1.557	0.8613	1.6526	0.7805	1.2088	1.1527	0.9551	0.8158	0.7487	1.0128	1.2309	0.6513	0.6849	0.9609	0.8448	1.2402	0.9568	1.2447
1635	1-palmitoyl-2-stearoyl-GPC (16:0/18:0)	Lipid	Phosphatidylcholine (PC)	52616	LC/MS Pos Late	100008921	2653	762.601	59403-51-9			HMDB07970	1.0792	0.9217	0.7733	1.3245	1.0364	0.9259	1.1475	1.0059	1.2397	0.8467	1.2195	1.2093	1.2765	1.1139	0.9351	0.7921	0.9019	0.9424	1.1215	1.0456	1.1712	1.402	0.9828	1.0222	1.066	1.0531	1.004	1.0965	1.5717	1.4204	1.0178	1.1917	1.4075	1.5614	1.2162	1.3583	1.167
2136	1-palmitoylglycerol (16:0)	Lipid	Monoacylglycerol	21127	LC/MS Neg	100000827	6550	255.233	542-44-9	14900		HMDB31074	0.2744	0.5945	1.1608	0.924	0.2744	0.841	0.892	1.1311	0.2744	1.3668	0.2744	0.2744	0.2744	1.2509	0.2744	1.5263	0.7162	0.2744	1.0978	1.1524	0.2744	0.8823	0.7794	0.8119	0.2744	1.3471	0.2744	0.9275	0.2744	0.9192	0.2744	0.6191	0.9102	1.2955	1.3802	1.4427	0.9512
1907	1-palmitoyl-GPC (16:0)	Lipid	Lysophospholipid	33955	LC/MS Pos Late	100001263	1525	496.34	17364-16-8	86554		HMDB10382	1.1188	0.9459	0.883	1.1041	1.0364	1.0527	1.1272	0.9095	1.1003	0.9777	1.0935	1.1173	1.1911	0.9763	0.9786	0.7583	1.0393	0.9662	0.8781	1.0507	1.0765	1.1585	0.8091	0.7718	1.0701	0.859	0.904	0.9971	1.2389	0.8648	0.8864	1.0437	1.0491	1.276	0.8508	1.0029	0.9949
1951	1-palmitoyl-GPE (16:0)	Lipid	Lysophospholipid	35631	LC/MS Pos Late	100001567	1544	454.293	53862-35-4	9547069		HMDB11503	1.1487	0.8527	0.9509	0.9265	0.9588	0.9075	1.4433	0.8738	0.9967	0.9608	1.226	1.0268	1.3766	0.9113	1.0676	0.7768	0.912	0.9227	0.9964	1.0644	1.0313	1.2946	0.7181	0.7613	1.3426	0.9943	0.9327	0.9992	1.0805	0.9821	0.8855	1.0137	1.2527	1.3791	1.2245	1.1952	0.9081
1980	1-palmitoyl-GPG (16:0)*	Lipid	Lysophospholipid	45970	LC/MS Neg	100005717	5570	483.273		3300276			0.9134	1.1676	1.0446	1.2233	1.3346	0.8059	1.2121	0.6434	2.4973	2.3023	0.8342	0.772	1.1911	0.8603	0.8025	0.3991	0.6944	0.3991	0.6247	0.7771	0.9203	0.721	0.3991	1.0653	1.2745	1.31	0.9779	0.9796	1.0433	0.3991	0.3991	0.6321	1.5091	1.9511	1.0712	1.2207	0.7119
1725	1-stearoyl-2-arachidonoyl-GPC (18:0/20:4)	Lipid	Phosphatidylcholine (PC)	42450	LC/MS Pos Late	100001869	2300	810.601	35418-59-8	16219824		HMDB08048	1.1852	0.9383	0.8952	1.3139	0.9711	0.7073	1.0002	0.8973	1.0863	0.5785	0.8701	1.1876	1.1449	1.0437	0.903	0.602	0.8302	0.8978	0.8547	0.8868	1.0272	0.9472	0.8417	0.8604	0.9998	0.8014	1.0015	0.9142	1.1131	1.0852	1.0075	0.9228	1.0599	1.2225	0.9385	1.1557	0.8795
1791	1-stearoyl-2-arachidonoyl-GPE (18:0/20:4)	Lipid	Phosphatidylethanolamine (PE)	52447	LC/MS Pos Late	100008977	2424	768.554		5289133		HMDB09003	1.2462	0.7417	0.7558	1.1577	0.8552	0.8837	1.3217	0.871	1.1597	0.7729	1.2216	1.0927	1.1245	1.0526	0.8775	0.5595	0.6249	0.8252	0.8032	0.8057	0.8661	1.0447	0.7735	0.8043	1.129	0.79	0.9423	0.9857	0.8798	1.0248	1.0028	0.7914	1.1327	1.4083	1.0458	1.3123	1.1338
1885	1-stearoyl-2-arachidonoyl-GPI (18:0/20:4)	Lipid	Phosphatidylinositol (PI)	52449	LC/MS Pos Late	100000616	3000	904.591	383907-33-3			HMDB09815	1.1022	0.9516	0.9567	1.3003	1.0259	0.9327	1.1161	0.981	0.9709	0.6466	1.2781	1.2304	1.2105	0.9683	0.871	0.6651	0.877	0.9565	0.9216	1.0902	0.9097	1.2284	0.7993	1.0418	1.0055	0.8011	0.9154	0.981	1.234	1.1219	0.8539	0.9917	0.842	1.2628	0.8487	1.0077	0.6758
1830	1-stearoyl-2-arachidonoyl-GPS (18:0/20:4)	Lipid	Phosphatidylserine (PS)	52235	LC/MS Pos Late	100001872	2565	812.544				HMDB12383	0.068	0.552	0.5697	0.9959	0.5641	0.8841	0.7659	1.1735	0.884	0.9736	1.0167	1.4049	1.6126	1.4189	0.7994	1.4331	0.068	0.4544	1.5112	1.2359	0.8004	1.6452	1.2519	1.4451	1.1316	2.018	1.0508	0.6095	1.2856	1.5183	1.7305	1.4553	1.4336	1.4106	0.8965	1.5189	1.626
1709	1-stearoyl-2-linoleoyl-GPC (18:0/18:2)*	Lipid	Phosphatidylcholine (PC)	52452	LC/MS Pos Late	100008980	2380	786.601				HMDB08039	1.3042	0.9736	0.9115	1.2513	1.0799	1.1101	1.2467	0.9875	1.1537	1.0093	1.1752	1.1328	1.3194	1.0585	0.9677	0.9768	0.9557	0.9004	0.9793	1.0068	1.0231	1.1191	1.0372	0.9282	1.1269	0.9547	1.0351	1.001	1.0741	0.9192	0.9318	0.9668	1.0815	1.226	1.0233	1.1659	0.9458
1778	1-stearoyl-2-linoleoyl-GPE (18:0/18:2)*	Lipid	Phosphatidylethanolamine (PE)	52446	LC/MS Pos Late	100008976	2522	744.554		9546749		HMDB08994	1.272	0.8615	0.9804	0.9029	0.9414	1.3209	1.6661	0.8767	1.1748	1.5944	1.323	0.8559	1.3624	0.8438	0.9587	1.0709	0.56	0.5297	0.8283	0.8183	0.7754	0.9764	0.951	0.6385	1.0323	1.0034	0.8928	0.8248	0.6209	0.7983	0.8127	0.6628	1.1786	1.3536	1.0963	1.2112	0.9062
1868	1-stearoyl-2-linoleoyl-GPI (18:0/18:2)	Lipid	Phosphatidylinositol (PI)	52468	LC/MS Pos Late	100008994	3185	880.591				HMDB09809	1.1795	1.0247	0.9443	1.2049	1.0763	1.4356	1.5405	1.1958	1.1285	1.7384	1.6236	1.3483	1.3857	0.9271	1.1838	1.52	0.8963	0.863	1.0043	1.1599	0.7948	1.3397	1.3576	1.1508	1.1666	1.0681	1.0883	1.1597	0.9826	0.7773	0.8517	1.036	1.1221	1.3632	1.0668	1.2001	0.5048
1704	1-stearoyl-2-oleoyl-GPC (18:0/18:1)	Lipid	Phosphatidylcholine (PC)	52438	LC/MS Pos Late	100008904	2644	788.616	56421-10-4			HMDB08038	1.1422	1.1704	0.8792	1.1626	0.9958	0.9107	1.2024	1.0527	0.8982	0.7266	1.4776	1.1708	1.5997	0.8686	0.7831	0.8732	0.844	1.1508	1.2583	1.1584	0.9814	1.8059	0.9041	1.2035	1.3154	1.039	0.9258	0.8598	1.0683	1.3597	0.7256	0.8745	1.2046	1.2104	1.204	1.0531	0.9043
1772	1-stearoyl-2-oleoyl-GPE (18:0/18:1)	Lipid	Phosphatidylethanolamine (PE)	42448	LC/MS Pos Late	100001856	2858	746.569				HMDB08993	1.2602	0.8661	0.8999	0.8977	0.976	1.066	1.7001	1.0011	1.0091	1.5372	1.3535	1.001	1.7486	0.7195	1.048	1.2112	0.5474	0.6606	1.1578	1.2617	0.976	1.3352	1.0983	0.7105	1.4293	1.2997	1.0575	0.7835	0.807	0.7975	0.7512	0.8725	1.5753	1.442	1.6396	1.3707	1.168
1914	1-stearoyl-GPC (18:0)	Lipid	Lysophospholipid	33961	LC/MS Pos Late	100001271	1606	524.371	19420-57-6	497299		HMDB10384	1.3529	0.9551	0.81	1.1867	1.1615	0.9018	1.1751	1.0044	1.1753	0.9115	1.0962	1.2572	1.2665	1.1167	0.9191	0.8655	1.1595	0.9488	1.0115	1.0586	1.1051	1.1233	0.8854	0.9188	1.1323	0.8767	0.9539	0.9515	1.2501	1.0549	1.0045	1.0287	0.9969	1.268	0.9138	1.1256	0.9059
1956	1-stearoyl-GPE (18:0)	Lipid	Lysophospholipid	42398	LC/MS Pos Late	100001461	1626	482.324	69747-55-3	9547068		HMDB11130	1.1169	0.7601	0.84	1.1447	0.9722	0.8291	1.2078	0.7941	1.1085	0.8538	1.0795	1.0135	1.1049	0.8561	0.8924	0.7869	0.8519	0.7258	0.9636	0.9152	0.882	0.9734	0.7188	0.7351	1.0954	1.1093	1.0101	0.998	1.2468	0.9578	0.9945	1.0636	1.1596	1.2389	1.0715	1.2258	0.7625
1990	1-stearoyl-GPI (18:0)	Lipid	Lysophospholipid	19324	LC/MS Neg	100000656	5794.3	599.32	796963-93-4			HMDB61696	1.619	0.759	0.7002	1.2341	1.0317	0.9156	1.1871	1.0019	1.1783	0.7958	1.0641	1.3521	1.1634	1.0861	0.6775	0.6527	0.8359	0.8823	0.9139	0.9759	0.9654	0.8906	0.5974	0.7892	1.2921	0.7097	0.8793	0.8975	0.9641	1.0743	1.0325	0.6234	0.6006	1.2584	0.9513	0.9661	0.5237
3652	2,3-dihydroxyisovalerate	Xenobiotics	Food Component/Plant	38276	LC/MS Polar	100002417	1050	133.051	1756-18-9	677	C04039	HMDB12141	0.691	0.7158	0.5857	0.8272	0.7543	0.4249	1.3823	0.8179	1.2247	0.7255	0.6721	0.5633	0.9614	0.7774	0.6515	0.7942	0.2658	0.2658	0.7901	0.7361	1.0635	0.4212	0.9222	0.2658	0.9558	0.4905	1.0004	0.2854	0.2658	0.2658	0.4116	0.9728	1.4024	0.6765	0.8244	0.6866	0.3652
3656	2,8-quinolinediol sulfate	Xenobiotics	Food Component/Plant	48691	LC/MS Neg	100004321	2612	239.997					1.2303	1.7356	1.4021	0.8342	0.4027	0.9068	0.0315	1.5493	0.7735	0.9935	0.4105	1.5471	2.4649	0.1518	0.8962	1.3019	0.3299	1.9336	0.748	1.8538	1.7042	0.0204	1.8137	1.1905	1.5465	0.0805	1.4625	2.2282	0.9027	0.6826	0.8897	1.2962	1.2393	1.6727	0.7847	1.3322	0.2456
94	2-aminoadipate	Amino Acid	Lysine Metabolism	6146	LC/MS Polar	381	3500	160.062	542-32-5;1118-90-7	469	C00956	HMDB00510	1.2062	1.1245	1.1655	0.9614	1.2272	0.8286	1.3581	1.1795	1.4289	0.8878	1.0767	0.8909	1.3629	1.5209	1.0473	0.4284	0.9967	0.961	1.0934	0.9013	2.0491	1.4306	1.104	1.1989	0.8511	0.4315	1.036	1.1077	0.8385	0.6392	1.0807	1.1722	0.8053	1.1799	1.1291	0.2351	0.8613
1288	2-aminoheptanoate	Lipid	Fatty Acid, Amino	43761	LC/MS Pos Early	100004542	3160	146.118	1115-90-8	227939			0.681	0.5139	0.8492	1.1206	1.6613	1.1833	0.8517	0.8071	0.8435	1.3001	1.1285	1.2485	0.2924	0.6507	1.1134	1.5048	1.3045	1.2074	0.7195	1.0635	1.0267	0.8675	1.5521	1.0508	0.555	0.8586	1.3329	1.3102	1.5025	1.526	0.4198	0.4584	0.5832	1.0739	1.6238	1.6582	3.0271
1293	2-aminooctanoate	Lipid	Fatty Acid, Amino	43343	LC/MS Neg	100004227	3385	158.119	644-90-6	69522		HMDB00991	0.5892	1.041	1.3061	1.091	1.6379	0.9232	0.4775	0.9052	0.922	1.0086	0.8003	1.2236	0.7468	1.2947	0.8094	1.1902	0.8612	1.1749	0.7514	0.8771	1.2394	0.9554	1.0753	0.8018	0.9658	0.7356	1.0004	0.8415	0.8327	0.8084	0.6017	0.9313	0.7071	0.9996	0.8094	0.8488	1.0921
4395	2-aminophenol sulfate	Xenobiotics	Chemical	43266	LC/MS Neg	100004322	1677	188.002		181670		HMDB61116	0.8821	1.4033	1.0091	0.8162	1.1993	0.8097	0.9366	1.6142	1.2587	1.6637	0.9909	1.0493	1.9703	1.4181	1.9547	1.0763	0.5319	0.7934	1.2624	1.5833	1.662	0.943	1.1958	0.6639	1.4333	1.175	1.6676	1.1872	0.7988	0.4951	1.1998	0.9846	1.6246	1.2543	1.6697	0.9406	0.9834
2156	2-arachidonoylglycerol (20:4)	Lipid	Monoacylglycerol	19266	LC/MS Neg	100000584	6170	303.233	53847-30-6	5282280	C13856	HMDB04666	1.2066	1.253	0.9093	1.0573	0.5255	1.0957	0.2001	0.665	0.2001	0.5593	0.2001	0.2001	0.792	0.2001	0.6939	0.8979	0.8717	0.2001	0.2001	0.5811	0.2001	0.7548	0.5678	1.2447	0.9794	2.0135	1	0.2001	0.8487	0.9557	0.5784	0.576	2.1523	1.6549	1.086	0.6682	1.0857
3319	2'-deoxycytidine	Nucleotide	Pyrimidine Metabolism, Cytidine containing	15949	LC/MS Pos Early	100000125	2193	228.098	951-77-9	13711	C00881	HMDB00014	0.9542	0.7688	1.1194	0.8961	0.8947	0.8597	1.0943	0.8025	0.9215	0.7891	0.9138	0.7518	0.7181	1.1036	1.0255	0.8277	0.8314	0.9096	0.8547	0.8165	0.8168	0.8474	0.7879	0.7494	0.7542	1.5258	0.7994	0.8764	0.8951	0.9977	1.0105	1.0272	1.6249	1.1259	1.211	1.662	1.5487
3296	2'-deoxyuridine	Nucleotide	Pyrimidine Metabolism, Uracil containing	1412	LC/MS Neg	536	1586	111.02	951-78-0	13712	C00526	HMDB00012	0.7874	0.5148	0.7475	0.88	0.7589	0.7291	0.531	0.4456	0.9159	0.8122	0.5306	0.6126	0.5882	0.593	0.6039	0.5962	0.8007	0.6376	0.498	0.5271	0.7335	0.6299	0.511	0.3986	0.5723	1.1765	0.6294	0.6036	0.936	0.8558	0.5407	0.7701	1.0221	0.8511	1.0015	1.2907	1.3981
2158	2-docosahexaenoylglycerol (22:6)*	Lipid	Monoacylglycerol	48675	LC/MS Neg	100006352	6050	309.222				HMDB11557	0.2383	0.5193	1.0189	1.0892	1.0278	0.7738	0.2383	0.9892	0.2383	0.7985	0.2383	0.6147	0.2383	0.9105	0.2383	0.8871	0.2383	0.7634	0.2383	0.4086	0.2383	0.3828	0.8791	0.4331	0.871	0.7347	0.2383	0.8696	1.675	0.9206	0.329	0.2383	1.9419	2.2092	0.6036	0.9622	0.697
299	2-hydroxy-3-methylvalerate	Amino Acid	Leucine, Isoleucine and Valine Metabolism	36746	LC/MS Neg	100001541	1800	131.071	488-15-3	164623		HMDB00317	0.9408	1.5269	1.0621	1.0427	1.157	0.9785	2.38	0.9857	1.5317	1.3731	1.0688	1.6064	2.3471	1.3179	1.6284	1.7	1.1704	0.9097	1.4672	1.1172	1.2131	1.185	2.7754	0.8743	1.3044	0.8649	0.7584	1.2972	0.5037	0.5983	1.8991	1.3108	0.2853	1.6638	0.969	0.8243	1.2595
1238	2-hydroxyadipate	Lipid	Fatty Acid, Dicarboxylate	31934	LC/MS Polar	100001153	3000	161.046	18294-85-4	193530	C02360	HMDB00321	0.8659	1.3579	0.4234	1.0876	1.2931	0.5845	1.5131	1.3528	1.3074	0.4234	1.0793	0.4234	1.1094	1.3984	1.1599	0.4234	0.8297	0.7116	0.4234	1.1955	0.864	0.4234	0.9146	0.6501	0.4234	0.5687	1.2778	3.6319	0.4234	0.4234	0.9663	0.4234	0.9406	0.4234	1.1782	0.7039	0.752
412	2-hydroxybutyrate/2-hydroxyisobutyrate	Amino Acid	Glutathione Metabolism	52281	LC/MS Polar	100008928	1258	103.04					0.9227	0.4127	1.059	0.7897	1.086	0.8008	0.845	0.7542	0.8439	0.6332	1.0002	0.8005	1.0653	0.9763	1.1486	0.6488	1.3167	1.1345	0.9778	0.9501	1.268	0.7422	1.1766	0.8618	0.7616	0.6344	0.9377	0.8069	0.672	0.8995	1.0889	0.8401	0.8723	0.735	0.8252	0.8124	1.3576
1395	2-hydroxydecanoate	Lipid	Fatty Acid, Monohydroxy	42489	LC/MS Neg	100004089	4840	187.134	5393-81-7	21488			1.0028	0.8976	2.1068	1.125	1.0581	1.1077	0.6891	1.2769	0.92	1.861	0.8699	0.8892	0.9739	0.8208	1.0904	1.6266	0.9374	0.7213	0.76	1.3072	0.8937	1.0513	1.2591	0.6856	0.9947	1.8413	1.1475	1.1457	0.7764	1.0798	1.4806	1.2032	0.9189	1.7666	1.5281	1.0216	1.0011
1234	2-hydroxyglutarate	Lipid	Fatty Acid, Dicarboxylate	37253	LC/MS Polar	100002070	3352.8	147.03	40951-21-1	43	C02630	HMDB00606	1.0923	1.3744	1.5179	0.917	1.198	0.8962	1.2677	1.2127	1.4461	1.2485	1.1819	0.8126	1.3295	1.8262	0.8766	0.7443	0.9834	1.0418	1.1476	1.1055	2.0992	0.9448	1.2286	1.1339	0.985	1.1232	1.3592	0.9393	0.9649	0.7934	1.3635	1.0561	1.1859	1.0915	1.225	0.7835	1.0766
3456	2-hydroxyhippurate (salicylurate)	Xenobiotics	Benzoate Metabolism	18281	LC/MS Neg	1869	2184	194.046	487-54-7	10253	C07588	HMDB00840	1.3152	1.0667	0.3895	0.3895	2.0688	1.04	0.3895	0.6337	0.3895	2.9696	2.5188	0.3895	0.9511	0.7862	1.1712	1.9159	0.3895	0.9918	1.1667	0.3895	1.3022	0.8676	1.8857	1.0987	0.9357	1.3655	1.4082	1.6545	0.3895	0.8982	0.7865	0.3895	1.4344	0.3895	1.7049	0.3895	0.9374
1394	2-hydroxyoctanoate	Lipid	Fatty Acid, Monohydroxy	22036	LC/MS Neg	100000743	3736.8	159.103	617-73-2	94180		HMDB02264	0.8515	1.1411	1.6014	1.1524	1.612	1.3243	0.7893	1.1457	1.0512	1.5144	0.9614	1.3115	1.3874	1.3647	1.1113	1.4179	1.0194	1.0145	1.0491	1.0333	1.3655	1.2306	1.2698	0.904	1.2009	1.6763	1.3556	0.9263	0.8429	0.9751	1.0478	0.9873	1.2091	1.143	1.625	1.0625	1.078
1398	2-hydroxypalmitate	Lipid	Fatty Acid, Monohydroxy	35675	LC/MS Neg	100001579	5511.2	271.228	764-67-0	92836		HMDB31057	0.9229	0.9413	1.1113	1.0365	1.1169	1.1459	0.7715	0.9923	1.3011	0.9753	1.2927	1.036	0.9677	1.3065	0.8354	1.0543	1.0951	0.9285	0.9845	0.797	1.3067	0.8679	0.907	0.9687	0.8955	1.0776	1.0567	0.9434	0.9068	1.0055	1.034	1.0066	1.0017	1.5356	0.9546	1.0815	1.2667
1399	2-hydroxystearate	Lipid	Fatty Acid, Monohydroxy	17945	LC/MS Neg	1239	5695	299.259	629-22-1	69417	C03045		1	1.0379	1.0799	1.31	1.0729	1.0404	1.0342	1.2797	1.2858	0.8744	1.1317	0.9945	0.8356	1.1635	1.4683	1.0924	1.2576	1.4778	0.8559	0.9887	1.4951	1.0755	1.1907	0.9008	1.3198	1.0038	1.0983	0.9071	1.0576	0.9536	1.252	0.8972	0.7977	1.1855	0.8184	1.2143	1.0149
2155	2-linoleoylglycerol (18:2)	Lipid	Monoacylglycerol	32506	LC/MS Neg	100000987	6250	279.233	3443-82-1	5365676		HMDB11538	1.9674	1.4668	0.5244	0.9921	2.2856	1.0907	0.8327	1.5601	1.5336	1.1747	0.8315	1.054	2.4962	2.0902	1.0693	0.5956	1.4236	1.5418	0.9186	1.005	1.1438	0.9635	0.8313	1	2.5885	0.7448	0.9127	0.8916	2.2446	1.4429	1.0157	1.1813	5.1842	3.1999	2.7278	1.756	1.7315
281	2-methylbutyrylcarnitine (C5)	Amino Acid	Leucine, Isoleucine and Valine Metabolism	45095	LC/MS Pos Early	100001509	3035	246.17	31023-25-3	6426901		HMDB00378	0.4139	0.5506	1.0496	0.8125	0.7604	0.8144	0.4796	0.6055	0.618	0.9052	0.7841	0.7314	0.6013	1.2688	0.7218	1.1591	0.9661	0.6135	0.7073	0.828	0.7923	0.679	0.9863	0.5379	0.5325	0.7561	0.9207	1.1179	0.6181	0.7588	0.9051	0.8887	1.0432	0.8431	1.0541	0.8677	0.864
282	2-methylbutyrylglycine	Amino Acid	Leucine, Isoleucine and Valine Metabolism	31928	LC/MS Neg	100001155	1884	158.082	52320-67-9	193872		HMDB00339	1.1675	0.8014	0.7065	0.9727	0.9166	0.511	1.0101	0.5482	0.2059	0.5055	1.0798	1.0324	1.2464	1.5777	0.736	0.4746	1.5515	1	0.831	0.7882	1.6404	0.8957	0.7254	1.0271	0.6956	0.3605	1.1056	0.9093	1.399	0.9747	0.9561	1.1115	0.8832	1.0915	0.5829	0.6633	1.6545
2154	2-oleoylglycerol (18:1)	Lipid	Monoacylglycerol	21232	LC/MS Neg	100000943	6500	281.249	3443-84-3	5319879		HMDB11537	1.6576	1.8867	0.5406	1.1773	1.9024	0.8642	1.3406	1.6249	1.1175	1.0219	0.9794	1.2042	3.434	1.8251	0.7699	0.5755	1.0343	1.6014	1.4616	1.9987	1.0464	1.4581	0.7713	1.1043	3.3557	0.9046	0.8816	0.8839	2.4128	1.3692	0.9139	1.0705	4.2186	2.651	4.089	1.5418	1.5327
3320	2'-O-methylcytidine	Nucleotide	Pyrimidine Metabolism, Cytidine containing	57554	LC/MS Pos Early	100010895	2411	258.108	2140-72-9	150971			0.9918	0.5929	0.9326	0.7717	0.9261	0.7712	0.7349	0.6763	0.8601	1.0328	0.7859	0.7454	0.7953	0.8654	0.7353	0.841	0.8017	0.9193	1.0171	0.6286	0.8977	0.7448	0.8056	0.6746	0.7741	1.1433	0.7749	0.8247	0.6472	1.0607	0.9174	0.9084	1.0378	0.7598	0.9161	0.7823	0.7485
3660	2-oxindole-3-acetate	Xenobiotics	Food Component/Plant	40479	LC/MS Neg	100003109	2076	190.051	2971-31-5	3080590		HMDB35514	1.7588	1.2839	0.341	0.7108	2.2263	0.8968	1.1965	1.3038	1.1267	1.2894	1.374	0.9459	1.9751	3.5372	1.0264	1.0538	2.2395	0.9145	2.62	0.7202	0.9208	4.5142	1.5061	2.1395	1.23	2.1459	0.705	2.2981	0.6946	1.6696	3.1933	0.7316	2.1048	0.5783	1.6519	0.5096	1.6287
96	2-oxoadipate	Amino Acid	Lysine Metabolism	38347	LC/MS Polar	92	2633.1	159.03	3184-35-8	71	C00322	HMDB00225	1.6188	1.3878	1.8756	1.6049	1.6707	0.7931	2.0012	1.5971	1.4571	1.1406	1.4559	1.2378	2.4152	1.7274	1.5253	0.7584	1.5787	1.4577	1.7216	1.4883	2.4798	1.2208	1.5587	1.7506	1.148	0.7367	1.7382	1.6288	0.8332	0.7379	2.356	1.7192	0.7993	1.2105	0.8108	0.754	0.91
349	2-oxoarginine*	Amino Acid	Urea cycle; Arginine and Proline Metabolism	55072	LC/MS Pos Early	100002784	1760	174.087	3715-10-04	558	C03771	HMDB04225	1.2848	1.3139	0.6524	0.908	1.3362	0.8071	1.4858	1.0818	1.127	1.1549	1.458	1.2118	1.1263	1.2049	1.2474	1.211	0.8544	0.9974	1.5158	1.3522	1.067	1.2331	1.3091	0.9118	1.0865	0.8899	1.3476	1.2084	0.6397	0.9785	1.2802	1.2725	1.3344	1.065	1.7365	1.0171	0.6907
2152	2-palmitoleoylglycerol (16:1)*	Lipid	Monoacylglycerol	52432	LC/MS Neg	100008953	6016	253.217				HMDB11565	1.2648	2.1953	0.4649	0.9089	1.869	1.1547	1.6732	2.3906	0.2454	0.9127	2.1499	1.5349	5.3062	1.7468	1.0853	0.7529	1.5293	2.5922	1.0904	2.1199	0.972	1.9416	1.2448	1.4365	3.1189	0.7467	0.8664	0.3153	2.9643	1.7327	1.0077	0.884	4.9617	3.0195	3.1494	1.3758	2.2704
1910	2-palmitoleoyl-GPC (16:1)*	Lipid	Lysophospholipid	47118	LC/MS Neg	100001561	5720	568.326				HMDB10383	1.0541	1.7168	0.8895	1.1363	1.5124	1.3214	1.6214	1.4706	0.7863	1.4509	2.3729	1.2619	2.1946	1.2149	1.2363	1.5119	1.3375	1.6004	1.0724	1.3273	1.3026	1.7583	0.6508	1.2579	1.4667	0.8654	1.1231	1.0205	0.9751	1.4002	0.8199	0.919	1.0831	1.2184	1.6346	0.7667	1.1157
2151	2-palmitoylglycerol (16:0)	Lipid	Monoacylglycerol	33419	LC/MS Neg	100001048	6400	255.233	23470-00-0	123409		HMDB11533	0.3308	0.56	0.3308	0.3308	0.3308	0.5586	1.0111	0.3308	0.3308	0.3308	0.3308	0.3308	0.3308	0.3308	0.3308	1.0482	1.2821	0.3308	0.3308	0.3308	0.3308	1.1673	0.6658	0.977	0.3308	1.0436	0.3308	0.3308	0.3308	0.9889	0.3308	0.9503	0.3308	0.3308	0.3308	1.6982	1.6638
1908	2-palmitoyl-GPC (16:0)*	Lipid	Lysophospholipid	35253	LC/MS Neg	100001562	6215	570.341		15061532		HMDB61702	1.0135	1.0953	0.7263	1.1533	1.1905	0.752	1.0914	0.7979	2.4173	0.674	0.9312	1.2381	2.6741	1.1089	1.1745	0.764	0.9396	1.1957	0.7998	0.8841	1.9231	1.3012	0.6935	0.7931	1.4222	0.7681	1.0281	1.0678	1.1125	0.8732	0.9316	0.8332	1.2661	1.6449	1.8675	0.9432	0.7993
1957	2-stearoyl-GPE (18:0)*	Lipid	Lysophospholipid	41220	LC/MS Neg	100003901	6350	480.31				HMDB11129	2.3159	0.37	0.5189	1.2057	1.7395	1.2882	1.8499	1.2764	1.7186	2.4243	1.0718	0.635	1.8003	1.3369	0.7342	0.5676	1.289	0.493	0.9683	0.8419	0.7486	0.4869	0.7256	0.4835	0.4123	0.3732	0.6695	0.9613	1.6308	0.7546	0.6371	0.3783	0.4122	2.6	0.7246	1.0089	1.6684
3533	3-(3-hydroxyphenyl)propionate	Xenobiotics	Benzoate Metabolism	35635	LC/MS Neg	100001624	1980	165.056	621-54-5	91	C11457	HMDB00375	1.3774	0.4803	7.6862	1.3274	1.2982	3.1859	1.5748	4.4705	1.6828	4.1241	2.9359	1.6567	0.6362	3.6666	3.6006	0.3935	0.2454	0.116	2.4422	1.1315	0.0993	2.8672	0.5976	2.4004	0.2534	2.6528	2.2093	0.3202	1.1241	0.3456	0.2892	0.965	2.2653	0.4367	1.4695	0.8095	0.2877
3530	3-(3-hydroxyphenyl)propionate sulfate	Xenobiotics	Benzoate Metabolism	45415	LC/MS Neg	100005391	1294	245.013	86321-32-6	187488			3.9997	1.6135	4.5579	3.0206	2.9795	3.1152	4.0666	4.99	3.0454	3.3064	4.0849	3.9409	1.9519	5.4424	5.3695	0.4157	0.7914	0.4637	5.025	2.4055	0.8238	3.8372	1.4011	3.5198	0.7411	2.7608	3.7119	1.1932	2.6041	0.502	1.047	2.7074	3.8167	1.3674	3.2345	1.6434	0.7237
134	3-(4-hydroxyphenyl)lactate	Amino Acid	Tyrosine Metabolism	32197	LC/MS Neg	240	1379	181.051	6482-98-0	9378	C03672	HMDB00755	0.726	0.983	1.2491	1.0446	1.0326	0.793	0.7518	0.7598	0.5194	0.9946	0.8232	0.583	1.4956	1.3505	0.9878	0.9228	0.8091	0.8119	1.3112	1.2603	1.1102	0.8319	1.0324	0.7674	1.0391	1.2108	0.852	0.7064	0.6939	0.5789	0.8986	1.0578	1.4109	0.7295	1.0354	0.7169	0.7779
3534	3-(4-hydroxyphenyl)propionate	Xenobiotics	Benzoate Metabolism	39587	LC/MS Neg	100002914	1670	165.056	501-97-3	10394	C01744	HMDB02199	0.6841	0.9483	6.6862	0.2165	0.6831	2.8456	0.5063	1.719	1.067	1.7932	1.5711	4.1562	0.713	2.6269	3.0983	0.6682	0.2165	0.2165	11.095	1.2351	0.2165	6.3057	0.8145	0.8164	0.4122	0.8401	6.2719	0.5581	0.2165	0.2165	1.0049	0.2165	1.2145	0.6489	1.0908	2.2706	0.7709
1318	3,4-methylene heptanoylglycine	Lipid	Fatty Acid Metabolism(Acyl Glycine)	55012	LC/MS Neg	100010861	3818	198.114					0.9582	1.195	1.019	1.1781	1.1114	0.7541	0.5318	1.0986	1.1063	0.5547	0.6562	1.2253	1.2751	1.3312	1.2269	0.6843	1.0325	1.0195	0.8628	0.9978	1.5634	0.7192	1.1447	0.9237	1.2519	0.8807	1.4325	1.0613	0.9686	1.1615	1.03	0.9505	1.0044	1.2601	0.8624	1.0456	1.5059
2600	3-dehydrocholate	Lipid	Secondary Bile Acid Metabolism	43835	LC/MS Neg	100001062	5050	405.265	2304-89-4	159655		HMDB00502	0.6979	0.1469	6.7222	0.4659	0.1469	1.7065	0.1469	0.1469	0.1469	3.2625	0.1469	0.1469	0.1469	0.1469	0.1469	3.4863	0.1469	0.1469	0.1469	0.1469	0.1469	0.1469	0.1469	0.1469	0.1469	6.5386	0.2921	0.236	0.1469	0.9448	0.1469	0.1469	0.1469	0.7416	0.8801	0.1469	0.3812
286	3-hydroxy-2-ethylpropionate	Amino Acid	Leucine, Isoleucine and Valine Metabolism	32397	LC/MS Neg	100001170	975	117.056	4374-62-3	188979		HMDB00396	1.5721	1.1489	1.1399	0.9785	0.7209	0.4581	0.9303	0.4729	0.9156	0.4581	0.4581	0.5885	1.1771	0.6663	2.1561	0.5576	1.8492	0.9414	1.1228	0.5422	1.3473	0.9686	1.55	0.6366	1.083	0.6485	0.8134	0.7533	0.4581	2.0135	1.6271	1.208	1.1921	1.1295	0.5778	0.9997	1.5964
2355	3-hydroxy-3-methylglutarate	Lipid	Mevalonate Metabolism	531	LC/MS Polar	112	2700	161.046	503-49-1	1662	C03761	HMDB00355	1.2053	0.7902	0.962	0.9959	0.9173	0.5315	0.9409	1.0694	1.3649	0.6877	0.9591	0.9928	1.7812	1.4922	0.8382	0.6292	1.1592	1.24	1.0802	0.9608	3.1196	0.6328	0.9434	1.38	1.0157	0.7101	1.1529	1.6964	1.0239	1.0806	0.9611	0.667	1.392	1.0008	0.98	0.7985	1.6934
1380	3-hydroxybutyrate (BHBA)	Lipid	Ketone Bodies	542	LC/MS Polar	254	1443.3	103.04	625-72-9	441	C01089	HMDB00357	1.1049	0.8084	0.8606	1.1407	0.8639	0.7253	0.7116	0.966	0.8676	0.4297	0.678	0.9919	1.203	1.2991	1.1888	0.546	1.4217	1.1913	1	0.8117	1.8568	0.9149	1.5231	1.3263	0.8416	0.4324	0.8125	1.3468	1.0129	1.43	1.452	0.6739	0.7193	1.0063	0.5964	0.8679	2.1124
1326	3-hydroxybutyrylcarnitine (1)	Lipid	Fatty Acid Metabolism(Acyl Carnitine)	43264	LC/MS Pos Early	100003926	2400	248.149		53481617		HMDB13127	0.71	1.0167	2.0415	1.3222	1.2117	0.9757	0.6469	1.0263	0.846	0.8018	0.9535	0.8876	0.8903	1.5839	1.1113	0.9226	1.9763	1.4147	1.0054	0.954	1.8109	0.8588	1.8986	1.3271	0.6255	0.5139	0.9435	1.9706	1.3848	1.7802	1.123	0.6507	0.7638	0.8953	0.7855	0.7305	1.8853
1327	3-hydroxybutyrylcarnitine (2)	Lipid	Fatty Acid Metabolism(Acyl Carnitine)	52984	LC/MS Pos Early	100009271	2340	248.149				HMDB13127	0.712	0.8644	2.024	0.8402	0.9642	1.1648	0.6969	0.8794	0.7964	1.0302	1.2291	0.6458	1.0041	1.6843	1.128	1.2433	1.0241	0.8666	0.8566	0.9462	1.3468	0.7964	1.4515	1.1484	0.6833	0.8604	0.9521	0.9988	0.8619	1.1936	0.7194	0.6719	0.8739	1.0059	0.858	0.7957	1.5377
3929	3-hydroxycinnamate sulfate	Xenobiotics	Food Component/Plant	48409	LC/MS Neg	100006094	1338	242.997	86321-30-4	6443141			2.2727	0.9094	2.4993	2.3917	2.3753	1.6585	2.4094	6.7188	1.6252	0.8974	4.9972	3.3523	1.0372	7.0288	7.9424	0.0651	0.3551	0.0651	5.4406	1.9809	0.5519	4.1353	1.1979	2.4973	0.3854	1.5313	3.9444	0.5727	2.1833	0.4811	0.3783	2.3431	2.887	0.6319	3.1524	0.9503	0.3875
1405	3-hydroxydecanoate	Lipid	Fatty Acid, Monohydroxy	22053	LC/MS Neg	100000997	4634.7	187.134	5561-87-5	26612		HMDB02203	0.7941	1.1444	2.1446	1.24	1.1347	1.4958	0.6543	0.8694	0.757	0.745	1.566	0.7032	1.4472	1.1711	0.8556	1.6484	1.0459	1.3382	1.2647	1.2688	1.3746	0.8068	2.102	1.0971	1.5355	1.0836	0.9954	1.0719	1.3541	1.345	1.3488	0.9343	0.6806	2.1666	0.5526	1.188	2.3209
1403	3-hydroxyhexanoate	Lipid	Fatty Acid, Monohydroxy	53230	LC/MS Neg	100006367	1725	131.071	10191-24-9	151492			1.177	1.0911	2.2994	0.9999	1.6152	1.4856	0.6505	0.6681	0.9046	0.8083	0.9107	0.9755	1.2534	1.1509	1.7119	1.6963	1.2482	0.9463	0.6814	0.7395	1.6685	0.9441	1.3892	1.3359	1.1701	1.4542	0.8846	1.1233	1.0457	1.4572	0.8903	1.0726	0.6009	1.5394	0.5918	1.0534	2.5635
303	3-hydroxyisobutyrate	Amino Acid	Leucine, Isoleucine and Valine Metabolism	1549	LC/MS Polar	111	1619	103.04	2068-83-9	87	C06001	HMDB00336	1.2974	1.1296	1.0063	1.1147	0.9319	0.8304	1.0964	0.986	0.6497	0.8116	0.7748	0.7733	1.8872	1.2383	1.0924	0.5437	1.4176	0.7219	1.682	0.9173	0.9843	0.7358	1.1183	0.9244	0.9058	0.7153	0.8885	0.9277	0.6285	1.0371	1.7077	0.8017	1.1222	0.8265	0.7254	0.7965	1.7479
1407	3-hydroxylaurate	Lipid	Fatty Acid, Monohydroxy	32457	LC/MS Neg	100001112	5175	215.165	53941-38-1	94216		HMDB00387	1.0773	1.172	2.3378	1.2965	0.9748	1.552	0.8946	0.8611	0.7402	0.5607	2.0749	0.7254	1.5061	1.1681	0.7344	2.3192	1.2506	1.6247	1.6655	1.4084	1.1145	0.7088	2.7593	1.1406	1.499	1.0403	0.7661	0.9237	1.0851	1.2826	1.5309	0.6708	0.6816	1.7371	0.6501	1.3034	2.8372
1404	3-hydroxyoctanoate	Lipid	Fatty Acid, Monohydroxy	22001	LC/MS Neg	100000773	3446	159.103	88930-08-9	26613		HMDB01954	0.9041	1.1917	2.2205	1.2488	1.1339	1.3053	0.5937	0.9684	0.8546	0.6145	1.0591	1.0897	1.243	1.3119	1.0003	1.1929	1.1107	1.1694	0.8769	1.0399	1.3516	1.0081	1.5963	1.244	1.3595	1.3412	1.1442	1.386	1.1793	1.4123	1.0437	1.0388	0.802	1.8853	0.6966	1.1833	2.2655
1406	3-hydroxysebacate	Lipid	Fatty Acid, Monohydroxy	31943	LC/MS Neg	100001145	1282	217.108	73141-46-5	3017884		HMDB00350	0.2826	1.5175	0.2826	0.2826	0.2826	0.2826	1.0653	0.5156	0.7718	0.2826	0.2826	1.5214	0.2826	0.6299	0.2826	1.0705	0.5078	3.5699	0.2826	0.2826	0.2826	0.5056	0.7917	0.5611	1.2167	0.2826	0.2826	1.2254	0.2826	0.9234	1.2047	0.7364	0.2826	0.2826	0.2826	0.531	0.7624
238	3-indoxyl sulfate	Amino Acid	Tryptophan Metabolism	27672	LC/MS Neg	100000467	2222.2	212.002	2642-37-7	10258		HMDB00682	1.8336	0.6463	1.0048	2.1734	1.3758	0.5137	1.4097	1.4587	1.4614	1.472	1.1957	0.9643	1.724	1.8343	0.8858	0.6572	1.254	1.0799	0.9737	1.9296	0.8639	1.0187	0.4827	0.5681	0.961	0.4617	0.966	1.0281	0.9043	0.6166	1.4422	1.0622	0.6714	1.0353	0.9472	1.0268	0.7705
151	3-methoxytyrosine	Amino Acid	Tyrosine Metabolism	12017	LC/MS Pos Early	1342	2555	212.092	300-48-1	1670		HMDB01434	0.8845	0.8387	0.5371	0.9142	0.8418	0.5557	0.8495	0.9225	0.7375	0.782	0.9722	0.9546	0.899	1.2151	0.8738	0.5974	0.7402	0.5449	0.9146	0.8543	1.0395	0.8142	0.6388	0.5028	0.7139	0.8251	1.0597	0.9598	0.7162	0.6469	0.9507	0.8042	0.7539	0.8542	0.879	0.6323	0.6309
298	3-methyl-2-oxobutyrate	Amino Acid	Leucine, Isoleucine and Valine Metabolism	44526	LC/MS Polar	100000936	911	115.04	3715-29-5	49	C00141	HMDB00019	1.2152	0.7928	1.3913	1.5841	1.0002	1.1705	1.1167	1.0664	1.3118	0.8736	1.0628	1.293	1.4883	0.7613	1.2266	1.1483	1.5118	1.4498	0.9884	1.2461	1.0945	1.2957	1.1716	1.1014	1.0784	0.8456	1.1059	1.1568	0.7818	1.2699	1.2605	1.1403	0.8521	1.3371	0.9851	1.6322	1.2913
278	3-methyl-2-oxovalerate	Amino Acid	Leucine, Isoleucine and Valine Metabolism	15676	LC/MS Neg	100000036	2064.2	129.056	1460-34-0;51829-07-3	47	C00671	HMDB03736	1.2946	0.8708	1.2048	1.7904	1.3029	1.1363	0.8639	1.1851	1.4527	0.7204	1.2723	1.4866	1.9019	0.8907	1.406	0.9361	2.2082	1.5566	0.9855	1.1051	1.6629	1.6591	1.1387	1.1911	1.2343	0.6668	0.9383	1.2874	0.9979	1.3187	1.4528	1.3452	0.9307	1.3409	0.9675	1.5169	1.3926
258	3-methylcrotonylglycine	Amino Acid	Leucine, Isoleucine and Valine Metabolism	31940	LC/MS Pos Early	100001149	1980	158.081	33008-07-0	169485		HMDB00459	1.4233	0.9188	0.5375	0.9362	1.1764	0.5525	1.2835	0.9194	1.1537	0.6351	1.0547	1.0039	1.5787	1.3361	1.0746	0.6663	1.4532	1.0251	1.7573	0.9787	1.3764	0.9568	1.0406	0.9867	1.009	0.5837	1.3015	1.3458	1.0239	0.8649	1.0726	0.9333	1.1082	0.8276	1.2044	1.345	1.3919
3311	3-methylcytidine	Nucleotide	Pyrimidine Metabolism, Cytidine containing	35132	LC/MS Pos Early	100001466	2176	258.108	21028-20-6	159649			1.116	0.731	0.9333	0.6071	0.4709	0.9646	0.8656	0.8464	0.8786	0.5501	0.8791	0.9722	0.6114	0.8228	1.1457	1.0398	1.1152	0.9901	1.1484	0.186	0.933	1.0577	1.6384	0.838	0.6373	1.3095	0.7754	1.0869	0.186	0.186	1.1348	1.0813	1.0955	0.186	1.0345	0.9545	0.6881
63	3-methylhistidine	Amino Acid	Histidine Metabolism	15677	LC/MS Neg	100000042	906.3	168.078	368-16-1	64969	C01152	HMDB00479	0.7172	0.7265	0.6059	1.1983	1.1977	0.5603	0.6473	0.7745	0.5243	0.5042	0.6509	1.1314	1.0977	0.7242	0.6073	0.3516	0.7618	0.9647	0.506	0.805	1.1498	1.0383	0.5155	0.6537	1.0541	0.4845	1.0039	1.1997	1.1299	0.9748	0.7446	0.7597	0.9989	1.0337	1.1114	0.9501	1.6175
3535	3-phenylpropionate (hydrocinnamate)	Xenobiotics	Benzoate Metabolism	15749	LC/MS Neg	100000010	2860	149.061	501-52-0	107	C05629	HMDB00764	0.618	0.8829	0.7986	0.5071	1	0.9857	0.4611	0.4815	0.5139	2.9383	0.2344	0.1619	1.361	0.2494	0.5106	7.5339	1.0787	1.2183	0.0616	1.2176	1.4699	0.1851	1.5885	0.277	1.3152	3.2798	0.1463	1.8855	0.2599	1.172	1.6756	0.8235	0.8127	1.2748	0.7041	0.1886	1.2023
879	3-phosphoglycerate	Carbohydrate	Glycolysis, Gluconeogenesis, and Pyruvate Metabolism	1414	LC/MS Pos Early	132	590	187	80731-10-8	724	C00597	HMDB00807	0.6583	0.9526	0.6388	0.7443	1.0378	0.6763	0.698	0.8707	1.0991	1.1724	0.8044	0.9246	1.7002	1.6941	1.1168	1.8484	0.7669	0.8774	2.1308	1.4424	2.0464	1.7942	0.8188	1.9181	1.069	2.4243	1.3114	0.7494	1.5732	1.9032	1.9033	1.6775	2.2588	1.3459	1.7593	1.8108	1.7136
3299	3-ureidopropionate	Nucleotide	Pyrimidine Metabolism, Uracil containing	3155	LC/MS Pos Early	1053	875	133.061	462-88-4	111	C02642	HMDB00026	0.6996	0.3128	0.6922	0.5308	0.5895	0.4476	0.3554	0.4966	0.915	0.6847	0.3731	0.4353	0.4387	0.7171	0.4977	0.2449	0.4192	0.3742	0.3435	0.5158	0.7931	0.4256	0.3089	0.4387	0.2855	0.8351	0.5221	0.6057	0.8121	0.8372	0.4404	0.3935	1.3432	1.0111	1.1302	1.0293	1.3866
395	4-acetamidobutanoate	Amino Acid	Polyamine Metabolism	1558	LC/MS Pos Early	1113	1350	146.081	3025-96-5	18189	C02946	HMDB03681	1.7073	0.6763	1.166	1.2004	1.1559	0.5423	0.9083	0.69	1.2237	0.6302	0.777	0.9299	0.9973	1.0494	0.9065	1.6223	1.1532	0.4752	1.0441	1.0829	0.8387	0.6578	1.0146	0.7348	1.3124	1.5855	0.7435	1.6771	1.2485	0.6284	0.7115	0.8706	1.1243	1.4627	0.8803	1.3955	0.7413
3891	4-allylphenol sulfate	Xenobiotics	Food Component/Plant	37181	LC/MS Neg	100001868	3805	213.023					1.3668	1.8184	0.9672	2.2204	1.4217	1.9056	1.243	1.9559	0.6388	2.8537	1.1286	1.3517	0.713	0.9063	1.0287	1.9132	2.3776	2.0919	2.7995	1.4077	1.6064	1.0924	0.8934	0.5858	1.2435	0.9001	1.0014	1.9754	1.0872	1.0838	1.6958	1.6133	1.5138	0.6485	1.5157	0.403	1.0433
3950	4-ethylphenol glucuronide	Xenobiotics	Food Component/Plant	52937	LC/MS Neg	100009049	3167	297.098					0.9164	1.5892	3.0654	2.6614	1.3442	1.6902	0.3296	2.061	0.0582	1.5263	0.5609	1.3458	1.4777	1.9779	1.1152	4.726	2.1809	1.8871	0.0392	9.1959	4.5749	0.686	1.5138	0.9334	1.6106	0.6321	5.2691	0.8224	0.9157	1.8509	2.1492	2.953	1.9318	0.6175	2.9673	0.504	0.4522
3497	4-ethylphenylsulfate	Xenobiotics	Benzoate Metabolism	36099	LC/MS Neg	100001756	3580	201.023	123-07-9		C13637		1.3761	2.0417	1.8182	2.1267	1.4402	1.3211	0.5994	1.6559	0.1243	0.8866	0.5076	1.1113	0.9642	1.1073	0.9149	2.4793	2.6042	1.8362	0.105	4.8579	3.1375	0.7118	1.844	0.9297	1.7214	0.4588	3.6978	0.841	1.1118	1.4947	1.4717	2.7468	2.3584	0.8561	3.4383	0.8936	0.7375
398	4-guanidinobutanoate	Amino Acid	Guanidino and Acetamido Metabolism	15681	LC/MS Pos Early	100000096	2320	146.092	463-003;463-00-3	500	C01035	HMDB03464	0.8363	1.1667	0.8364	0.8254	1.1099	1.0205	1.4478	1.2366	1.0752	1.9414	1.5364	0.8908	0.9638	1.4181	1.4307	1.2237	0.6009	0.7033	1.4464	1.3372	1.216	0.8892	1.1337	1.0024	1.1981	1.1932	1.4892	1.1385	0.7153	0.6131	0.6383	1.0868	2.3618	1.1326	2.2445	1.1188	0.6546
3984	4-hydroxycinnamate	Xenobiotics	Food Component/Plant	36770	LC/MS Polar	100001675	1200	163.04	501-98-4	637542	C00811	HMDB02035	1.4818	0.9185	1.4456	1.0417	1.3105	0.9192	2.2606	0.9903	1.5875	1.967	1.017	0.7727	1.7533	0.9349	1.3567	0.963	0.513	0.3771	1.9962	1.112	0.9664	0.771	1.0155	0.2294	1.1907	1.4138	1.2279	0.7608	0.5306	0.3533	0.7698	0.9638	2.5202	0.7782	1.9755	2.0847	3.3338
177	4-hydroxycinnamate sulfate	Amino Acid	Tyrosine Metabolism	48410	LC/MS Neg	100006095	1000	242.997	376374-66-2	6070438			1.0434	0.6254	2.1731	0.9081	1.6513	1.0812	1.222	1.2415	1.0902	1.1619	1.2215	0.9956	2.4764	1.6874	0.9188	0.344	0.3494	0.1143	1.5334	1.2037	0.6284	0.5689	0.5553	0.1561	0.7005	0.5827	1.1453	0.3918	0.8017	0.1242	0.4981	0.586	1.6036	1.1609	1.0495	1.3618	4.1046
3458	4-hydroxyhippurate	Xenobiotics	Benzoate Metabolism	35527	LC/MS Neg	100001423	1475	194.046	2482-25-9	151012		HMDB13678	3.1311	0.7682	0.8475	1.4349	2.3092	0.5085	2.8098	1.4827	2.6096	0.7151	2.2165	1.6781	2.8293	2.2928	1.2456	0.2228	0.9833	0.4352	1.8783	1.7925	1.0569	0.8546	0.7236	0.2104	1.1398	1.1095	1.0279	0.5939	0.1508	0.67	0.7087	0.8994	0.9594	0.9146	1.2681	0.795	1.2276
131	4-hydroxyphenylpyruvate	Amino Acid	Tyrosine Metabolism	1669	LC/MS Neg	1141	1690.1	179.035	156-39-8	979	C01179	HMDB00707	1.041	1.0801	0.7775	1.1078	1.0678	0.6196	1.1647	0.731	0.6688	1.0242	0.7536	0.6744	1.9707	0.8143	1.0298	0.6444	0.7937	0.8007	1.5277	1.5535	1.0161	0.9456	0.7489	0.5959	1.0793	1.1142	0.9484	0.7098	0.4802	0.5535	0.9371	1.034	1.4058	0.6915	1.0888	0.7532	0.6062
244	4-methyl-2-oxopentanoate	Amino Acid	Leucine, Isoleucine and Valine Metabolism	22116	LC/MS Neg	100000551	2170	129.056	816-66-0	70	C00233	HMDB00695	1.1449	0.7715	1.215	1.5833	1.2277	1.3464	0.8644	1.3246	1.4578	0.7889	1.1435	1.4131	1.9208	0.8288	1.507	0.9049	2.0199	1.5182	1.0246	1.1199	1.6223	1.6726	1.1657	1.1306	1.1335	0.7372	0.9357	1.1879	0.9534	1.1917	1.1498	1.1054	1.1777	1.1194	1.0934	1.7845	1.1546
3487	4-methylcatechol sulfate	Xenobiotics	Benzoate Metabolism	46146	LC/MS Neg	100004111	2665	203.002					1.1452	1.7076	1.4455	1.3475	0.8151	0.6258	0.8148	0.9149	0.894	1.4298	0.825	1.3757	1.4936	0.3741	1.3078	0.8896	0.7692	0.5286	1.163	1.8376	1.2328	0.8303	1.4949	0.6472	1.169	0.8658	1.9534	1.3474	0.715	0.658	1.2819	1.1357	1.1923	0.6046	1.2853	0.9394	1.2672
3498	4-vinylphenol sulfate	Xenobiotics	Benzoate Metabolism	36098	LC/MS Neg	100001755	3320	199.007	2628-17-3	6426766	C05627	HMDB04072	1.7237	0.9925	0.6247	1.4116	1.213	0.6764	1.3852	0.9439	0.9999	0.9104	1.1103	0.7935	1.0408	0.916	0.9553	0.7938	0.7525	0.7829	1.1496	1.4034	0.9229	0.8153	0.9341	0.3455	1.7446	0.7885	1.1051	0.6764	0.4966	0.3849	0.8785	0.9601	1.1588	0.8164	1.6303	0.822	0.7786
3330	5,6-dihydrothymine	Nucleotide	Pyrimidine Metabolism, Thymine containing	1418	LC/MS Pos Early	158	1280	129.066	696-04-8	93556	C00906	HMDB00079	0.7175	0.2979	2.6946	0.2979	0.2979	1.6251	0.7169	0.7035	0.6801	2.99	0.2979	0.2979	0.7165	0.2979	0.2979	1.8433	0.2979	0.2979	1.0189	0.2979	0.8985	2.2597	0.4795	0.2979	0.2979	1.8459	0.4855	0.2979	0.2979	0.5932	0.4548	0.7704	0.8325	0.671	0.6761	0.983	0.9968
3292	5,6-dihydrouracil	Nucleotide	Pyrimidine Metabolism, Uracil containing	1559	LC/MS Neg	1125	1120	113.036	504-07-4	649	C00429	HMDB00076	0.5515	0.2902	1.8489	0.5704	0.4113	0.8317	0.4449	0.2902	0.6149	2.1913	0.7148	0.2902	0.5393	0.8865	0.6486	1.4595	0.7515	0.2902	0.6783	0.5797	0.6963	0.868	0.488	0.6955	0.2902	1.6168	0.3706	0.2902	0.8211	0.8231	0.7424	0.5039	0.9755	0.67	0.2902	0.6859	0.8485
1412	5-hydroxyhexanoate	Lipid	Fatty Acid, Monohydroxy	31938	LC/MS Neg	100001148	1267	131.071	44843-89-2	170748		HMDB00525	0.562	0.6617	1.2698	0.6028	1.0165	1.2586	0.3114	1.2511	0.3114	0.9166	0.9054	2.3385	3.0647	0.8952	0.3114	1.4145	1.0506	0.8939	1.1541	0.9618	0.989	2.4383	1.0476	0.9277	0.6117	1.0743	0.3114	0.9177	0.3114	0.6679	1.1046	0.5055	0.7746	0.3114	0.5394	0.8487	1.476
221	5-hydroxyindoleacetate	Amino Acid	Tryptophan Metabolism	437	LC/MS Neg	71	1510.2	190.051	54-16-0	1826	C05635	HMDB00763	0.9208	1.2469	1.9792	1.2825	1.35	1.0584	0.7061	1.1402	0.6639	0.9292	1.0301	1.0807	1.67	1.6383	1.4804	1.3935	1.1754	1.3546	1.3335	1.3372	1.6331	1.1264	1.5602	1.1375	1.1687	1.3266	1.3851	1.7119	1.158	1.2102	1.3488	1.3536	1.369	0.8152	1.4975	0.806	1.4391
91	5-hydroxylysine	Amino Acid	Lysine Metabolism	15685	LC/MS Pos Early	100000054	2790	163.108	13204-98-3	1029	C16741	HMDB00450	1.1719	0.7046	0.9788	1.1164	1.0127	0.575	0.8224	0.8085	0.9997	0.9968	0.7205	0.9755	0.6849	1.1248	0.749	0.3647	0.7357	0.5073	0.6366	0.7571	1.1626	0.5387	0.5284	0.615	0.6307	0.982	0.9622	0.9213	0.7286	0.9105	0.8389	0.7867	0.8696	0.9426	0.9892	0.7826	0.7126
3321	5-methyl-2'-deoxycytidine	Nucleotide	Pyrimidine Metabolism, Cytidine containing	38159	LC/MS Pos Early	100002300	2303	242.114	838-07-3	440055	C03592	HMDB02224	1.0105	0.8239	0.7107	0.8467	0.7419	0.5638	1.1091	0.5261	0.7277	0.4921	0.7357	0.5866	0.9727	0.9062	0.8338	0.708	0.7497	0.9221	1.0204	0.8336	0.7395	0.6981	0.4841	0.5381	0.8465	1.3257	0.6738	0.6642	0.7202	0.652	1.0039	1.0959	1.1251	0.8902	0.8458	1.028	0.9181
3312	5-methylcytidine	Nucleotide	Pyrimidine Metabolism, Cytidine containing	22119	LC/MS Pos Early	100000763	2227	258.108	2140-61-6	92918		HMDB00982	1.4398	0.9645	1.5006	1.5687	1.8926	1.0744	1.0074	1.1162	1.2345	1.1928	1.3402	1.5546	1.0575	1.3373	1.2899	1.5987	1.8563	1.6947	1.2001	1.4741	1.5039	1.4527	0.9482	1.2772	1.4194	1.2029	1.4838	1.5604	2.1333	2.0823	1.2249	1.4664	1.4712	2.0526	1.2541	1.3647	1.7777
390	5-methylthioadenosine (MTA)	Amino Acid	Polyamine Metabolism	1419	LC/MS Pos Early	212	2752	298.097	2457-80-9	439176	C00170	HMDB01173	0.649	0.5511	0.7306	0.7801	0.786	0.6478	0.6762	0.739	0.594	0.5908	0.7615	0.6911	0.8606	1.2154	0.8462	0.8062	0.7515	0.6968	1.0818	0.8105	0.8767	0.8105	0.8903	0.7	0.6552	1.5659	0.8946	0.8288	0.9946	1.0316	1.1053	0.8926	1.1209	0.7563	1.0072	1.2852	0.9679
3285	5-methyluridine (ribothymidine)	Nucleotide	Pyrimidine Metabolism, Uracil containing	35136	LC/MS Neg	100001446	1778.1	257.078	1463-10-1	445408		HMDB00884	0.7119	1.0393	1.4327	1.6673	1.5799	0.9373	0.5289	1.0261	0.7152	0.8349	0.875	1.2285	1.2643	1.7284	1.1948	0.9385	1.1963	1.645	1.0539	1.1622	1.6715	0.9681	1.0918	0.8713	0.7855	0.4887	1.0922	0.8977	0.5393	0.6535	1.3046	1.1355	0.1753	0.832	0.5722	0.3583	0.6418
409	5-oxoproline	Amino Acid	Glutathione Metabolism	1494	LC/MS Neg	1021	738.5	128.035	98-79-3	7405	C01879	HMDB00267	0.7122	0.6073	0.9263	0.8314	0.7866	0.8008	0.6531	0.7785	0.6794	1.0698	0.7849	0.8093	0.7133	0.7761	0.626	1.0045	0.6423	0.6175	0.6673	0.8262	0.6086	0.6479	0.7406	0.5876	0.5633	0.9268	0.6592	0.7788	0.7461	0.8128	0.7278	0.648	0.6533	0.6992	0.8009	0.9728	0.9547
4508	6-hydroxyindole sulfate	Xenobiotics	Chemical	48698	LC/MS Neg	100006260	2498	212.002					0.6915	1.0504	1.2545	1.2711	1.0021	0.7601	0.7207	1.2205	0.6292	1.6501	0.9743	0.8979	1.4915	1.1024	1.3475	1.5545	0.547	1.0568	1.8744	1.3907	1.3242	1.0551	1.1455	0.9605	1.3036	0.9821	1.0636	1.362	0.9241	0.6626	1.4574	0.9374	1.1618	0.9745	1.4155	0.8153	0.6971
104	6-oxopiperidine-2-carboxylate	Amino Acid	Lysine Metabolism	43231	LC/MS Neg	100004499	964.5	142.051	34622-39-4	3014237		HMDB61705	0.9868	0.5138	0.5138	0.9093	0.5138	0.5138	1.0632	0.696	0.9172	0.9946	0.5138	0.8766	1.3004	0.5138	0.8115	0.5138	2.1493	0.9774	1.4355	0.5138	1.4047	1.5606	0.9873	1.2355	0.8624	0.5138	0.5138	0.7605	0.5138	0.5138	0.685	1.405	0.9253	0.5138	1.0085	0.5138	0.5138
2379	7-alpha-hydroxy-3-oxo-4-cholestenoate (7-Hoca)	Lipid	Sterol	36776	LC/MS Neg	100001609	5288.1	429.301	115538-85-7	3081085	C17337	HMDB12458	1.7956	0.6413	2.6597	0.8056	1.1889	1.3813	1.2099	0.9944	1.2562	3.2584	1.6305	1.0082	0.964	0.7609	1.165	1.3269	0.9166	1.0259	0.9279	1.5015	0.7962	0.7202	0.7567	0.487	0.7087	1.3812	0.8906	0.7814	0.3776	0.6821	0.8663	0.796	1.0956	1.0363	1.2146	0.8694	0.4417
3251	7-methylguanine	Nucleotide	Purine Metabolism, Guanine containing	35114	LC/MS Neg	100001456	1729.7	164.058	578-76-7	11361	C02242	HMDB00897	0.8039	0.942	0.8246	1.001	0.7943	0.7419	0.5856	0.8503	0.4915	0.8304	0.9203	0.909	0.8596	1.0405	1.0001	1.0315	0.8917	0.9281	1.0437	0.8773	0.9019	0.8906	0.8415	0.8972	0.9922	1.1732	1.1025	1.0823	0.6694	0.9909	1.2123	1.1713	0.748	1.1412	0.9604	0.8456	1.0328
1444	9,10-DiHOME	Lipid	Fatty Acid, Dihydroxy	38399	LC/MS Neg	179	5180	313.238	263399-34-4	9966640	C14828	HMDB04704	1.2464	0.8208	1.3235	1.4798	0.8385	1.2813	0.7989	0.7359	0.7951	1.0321	0.9072	0.84	0.726	0.9286	0.6277	1.5989	0.8547	1.1425	0.8078	0.7426	0.8097	0.8272	2.2384	1.0375	1.0162	1.3181	1.2573	0.8855	0.974	0.941	1.0613	0.7081	1.2378	1.7318	1.0711	1.6917	2.1054
1325	acetylcarnitine (C2)	Lipid	Fatty Acid Metabolism(Acyl Carnitine)	32198	LC/MS Pos Early	100000802	2282	204.123	5080-50-2	1	C02571	HMDB00201	0.7504	0.7998	1.0884	0.8757	0.9377	1.1069	0.6843	0.8218	0.8968	0.9476	0.8554	0.891	0.7835	0.9798	0.9378	1.0807	0.9601	0.9145	0.7168	0.8327	1.1179	0.8622	0.9882	0.8313	0.7441	0.8757	0.9291	0.9952	0.9045	1.0085	0.793	0.816	0.9283	0.9551	0.9969	0.8701	0.9506
3216	adenine	Nucleotide	Purine Metabolism, Adenine containing	554	LC/MS Pos Early	880	2221	136.062	73-24-5	190	C00147	HMDB00034	0.706	1.2935	1.9896	0.6999	1.179	2.4969	0.9614	1.5596	1.3451	1.3113	8.7048	1.5584	1.1586	5.4225	1.8484	2.4028	1.1406	4.9647	9.4361	3.0773	1.7773	1.2338	14.5312	4.79	0.6288	1.405	1.3705	1.7449	1.2141	1.5131	2.3677	1.1261	1.077	1.1117	0.9675	0.8765	1.0834
3211	adenosine 3',5'-cyclic monophosphate (cAMP)	Nucleotide	Purine Metabolism, Adenine containing	2831	LC/MS Neg	207	1952.2	328.045	60-92-4	6076	C00575	HMDB00058	0.8172	0.6755	1.5408	1.3793	1.3717	0.9436	0.6209	1.1837	0.8863	1.0019	1.3135	1.2734	1.5058	2.4238	1.184	0.7885	0.8893	1.131	1.3108	1.1082	1.4072	1.0565	0.7683	1.0097	1.25	0.9195	0.7604	0.9915	1.3555	1.121	1.3832	0.9368	1.7983	1.104	1.2436	1.1074	1.4164
3361	adenosine 5'-diphosphoribose (ADP-ribose)	Cofactors and Vitamins	Nicotinate and Nicotinamide Metabolism	558	LC/MS Neg	215	920	558.064	68414-18-6	192	C00301	HMDB01178	0.386	0.8297	0.5986	1.5174	1.3605	0.7352	0.5025	1.5555	0.9668	1.3684	1.334	1.0145	2.1323	3.0603	0.9526	1.2229	0.8022	1.1611	2.1561	1.3805	1.6585	1.1526	1.1869	1.0631	1.8561	2.1255	1.2688	0.9356	2.1758	1.0027	2.1235	1.2244	1.9873	1.5823	1.5769	0.8258	1.5533
1348	adipoylcarnitine (C6-DC)	Lipid	Fatty Acid Metabolism(Acyl Carnitine)	52988	LC/MS Pos Early	100006614	2558	290.16		71296139		HMDB61677	0.7713	0.8146	1.4279	1.0388	1.2335	1.1409	0.6561	0.8336	0.7756	0.6967	0.9711	1.2042	0.7004	1.2163	0.9124	0.698	1.2045	0.9341	0.6169	0.7447	1.5541	0.7146	1.1561	1.1543	0.5886	0.6563	1.0114	1.3	1.6609	1.709	0.8327	0.7829	0.7653	1.3151	0.711	1.2562	2.0272
1158	adrenate (22:4n6)	Lipid	Polyunsaturated Fatty Acid (n3 and n6)	32980	LC/MS Neg	100001193	5678	331.264	2091-25-0	5497181	C16527	HMDB02226	0.2736	0.6853	0.2761	0.9084	0.6822	2.186	0.2736	1.095	1.5007	0.2736	0.2736	0.2736	0.5733	0.2736	0.2736	0.3006	0.8775	0.2736	0.2736	0.2736	0.2736	0.446	1.0326	0.3759	0.2736	0.4797	0.2736	0.2736	0.8565	1.0551	0.6134	0.5443	1.3468	1.4362	0.6395	1.4981	2.4852
1355	adrenoylcarnitine (C22:4)*	Lipid	Fatty Acid Metabolism(Acyl Carnitine)	57528	LC/MS Pos Late	100015850	1415	476.373					0.8408	0.4812	1.4468	0.8146	0.4812	0.7338	0.4812	0.4812	0.7023	0.4812	0.4812	0.7255	0.4812	0.9059	0.4812	0.4812	0.4812	0.4812	0.4812	0.4812	0.9476	0.5891	0.4812	0.4812	0.4812	1.426	0.4812	0.8051	0.4812	0.4812	0.4812	0.8576	0.4812	1.4223	0.4812	0.672	1.2732
28	alanine	Amino Acid	Alanine and Aspartate Metabolism	1126	LC/MS Pos Early	811	1700	90.055	56-41-7	5950	C00041	HMDB00161	1.0497	0.9202	1.0613	0.9748	0.9848	1.0459	0.9757	0.8312	0.9413	1.1457	0.9981	0.9891	1.0061	0.9759	0.9511	1.0268	0.8566	0.8474	0.8857	0.954	1.0975	1.0203	0.8606	0.7812	0.8829	1.1197	0.8948	0.9013	0.9294	0.8907	0.8333	0.9125	1.1442	0.8386	0.9777	0.9173	0.8024
3203	allantoin	Nucleotide	Purine Metabolism, (Hypo)Xanthine/Inosine containing	1107	LC/MS Polar	1002	1672	157.037	97-59-6	204	C02350	HMDB00462	0.9545	0.7238	0.729	0.7546	0.7433	0.671	0.666	0.7578	0.8798	0.628	0.6336	0.6906	0.9529	0.7355	0.8409	0.535	1.0529	0.8928	0.7707	0.7487	0.9607	0.8313	0.634	0.722	0.6997	0.6115	0.8131	0.8036	0.5935	0.7461	0.8943	0.8894	0.9516	0.8879	0.7843	0.8359	1.0224
247	alpha-hydroxyisocaproate	Amino Acid	Leucine, Isoleucine and Valine Metabolism	22132	LC/MS Neg	100000706	1840	131.071	10303-64-7	83697	C03264	HMDB00746	1.217	1.56	0.7673	1.0823	1.1154	1.1949	1.6666	0.7173	1.1051	1.4628	1.5548	1.2579	2.148	1.3244	1.1222	1.5041	1.1015	0.7887	1.342	1.0138	1.058	0.9631	2.5015	0.6125	1.3337	0.721	0.8218	1.1185	0.6547	0.661	1.3959	1.0569	0.5663	0.9493	1.1763	1.3399	0.9387
279	alpha-hydroxyisovalerate	Amino Acid	Leucine, Isoleucine and Valine Metabolism	33937	LC/MS Neg	100001300	1126	117.056	600-37-3	99823		HMDB00407	0.9696	0.7745	0.9336	0.8244	0.9302	0.9643	1.2171	0.8172	1.4792	0.7739	1.0983	0.9513	1.499	0.9547	1.074	1.0254	1.4996	1.0467	0.745	0.8398	1.3653	0.979	1.4824	0.9994	1.2353	0.5516	0.7064	0.8211	0.7592	0.8104	0.9574	1.3328	0.7367	1.195	0.5818	1.0818	1.5105
1059	alpha-ketoglutarate	Energy	TCA Cycle	528	LC/MS Polar	93	2700	145.014	305-72-6;328-50-7;22202-68-2	51	C00026	HMDB00208	1.0961	1.8148	3.7605	1.2836	1.5714	1.7626	1.9024	1.5343	1.5213	1.7585	1.6343	1.3043	1.9893	1.8442	1.483	1.9243	1.5531	1.2313	1.8085	1.7242	2.6562	1.2963	3.1083	1.8334	1.081	1.9427	1.9317	1.1703	0.6314	0.6269	1.5438	1.6002	0.6679	0.9125	0.7909	0.5805	0.6831
2562	alpha-muricholate	Lipid	Primary Bile Acid Metabolism	34092	LC/MS Neg	100001280	4765	407.28	2393-58-0	3083761	C17647	HMDB00506	8.4743	0.0895	40.9376	2.549	0.0895	5.4042	0.8093	0.6595	0.0895	14.3642	0.0895	1.2785	0.9467	0.0895	0.0895	20.0698	0.3287	0.6114	0.2933	0.9401	0.2862	0.0895	0.0895	0.0895	0.5256	21.3595	0.0895	0.0895	0.0895	0.0895	0.0895	0.0895	0.3608	4.0996	0.0895	0.1522	1.3789
3383	alpha-tocopherol	Cofactors and Vitamins	Tocopherol Metabolism	1561	LC/MS Pos Late	1105	2522	430.378	59-02-9;10191-41-0	14985	C02477	HMDB01893	2.6196	0.3306	2.4433	0.4762	2.483	0.8326	2.3286	0.1114	1.1989	0.2051	1.3936	0.4172	0.724	0.2405	0.4361	0.0861	1.37	2.4889	0.0636	0.2121	1.0033	0.5252	0.2057	0.0565	0.1907	0.1001	0.3753	0.8182	0.1679	0.0825	0.0814	0.1003	0.2115	0.3805	0.131	0.1359	0.293
3208	adenosine 5'-monophosphate (AMP)	Nucleotide	Purine Metabolism, Adenine containing	32342	LC/MS Pos Early	209	1013	348.07	149022-20-8	6083	C00020	HMDB00045	0.4795	0.6555	0.4324	0.719	0.9338	0.936	0.6316	0.9588	0.6666	0.5823	0.8094	0.7211	1.9079	1.6291	0.5028	1.1702	0.8043	1.0238	1.2455	1.2224	1.2787	1.099	1.3595	1.0275	0.611	3.3916	1.149	0.6811	2.1057	1.3814	1.634	1.1407	0.992	0.83	0.5406	0.8996	2.0997
441	anserine	Peptide	Dipeptide Derivative	15747	LC/MS Neg	100000044	1124.8	239.115	10030-52-1	112072	C01262	HMDB00194	0.3382	0.6667	1.5875	0.9179	1.0797	0.8124	0.6346	0.8716	0.4703	0.6276	1.1193	0.8859	1.8284	2.4912	1.351	0.6823	0.6927	0.8121	0.9418	1.0709	0.8193	1.1424	0.7318	0.8894	0.6558	0.9079	0.8357	1.5048	0.9845	1.1737	0.9943	0.6253	1.0892	0.6572	1.4925	0.9172	1.1571
922	arabitol/xylitol	Carbohydrate	Pentose Metabolism	48885	LC/MS Polar	100006430	1932.4	151.061		6912	C01904		1.2542	0.9471	1.218	0.9305	0.9861	1.0264	1.3412	0.9596	1.14	1.082	1.0194	1.0251	1.1804	1.3759	1.2942	0.9108	0.8157	0.9003	1.3057	1.0526	1.0939	0.9419	1.0625	0.8381	0.9539	1.0741	0.8864	0.8791	0.7696	0.769	1.3501	1.128	1.4867	1.1604	1.1166	0.9871	0.8657
924	arabonate/xylonate	Carbohydrate	Pentose Metabolism	48255	LC/MS Polar	100006115	2664.6	165.04					1.7896	0.5158	0.622	0.8733	1.7633	0.2265	1.2601	1.4724	1.099	0.2716	0.6497	0.9638	1.9709	2.1669	0.9458	0.3364	1.1996	0.3311	1.3813	1.9971	1.651	1.3925	0.5682	0.8493	1.17	0.2588	0.8038	1.3727	0.4928	0.7414	2.6267	1.3417	0.6476	1.1451	0.8465	0.9975	0.8938
1126	arachidate (20:0)	Lipid	Long Chain Fatty Acid	1118	LC/MS Neg	893	6295	311.296	506-30-9	10467	C06425	HMDB02212	1.0174	0.9458	0.6876	1.2876	1.0815	1.218	1.1586	1.127	1.3262	1.1076	1.3577	0.8773	1.2129	0.786	1.3414	1.4823	1.2339	1.0087	1.2991	0.9381	0.8705	0.6644	1.1335	0.8605	1.5656	1.093	1.0691	0.7868	0.9371	1.0107	1.2044	0.7164	1.1219	1.3534	0.978	1.4441	1.1903
1157	arachidonate (20:4n6)	Lipid	Polyunsaturated Fatty Acid (n3 and n6)	1110	LC/MS Neg	229	5535	303.233	506-32-1	444899	C00219	HMDB01043	1.2942	1.1216	0.6656	1.6114	1.2191	0.8643	1.0865	0.9945	1.4675	0.683	0.8253	1.1808	1.3214	1.2831	0.8231	0.7328	1.1802	0.9998	0.7953	0.9881	1.0273	0.7775	0.8223	0.8088	1.4106	0.7648	0.9809	0.8713	1.0671	1.0401	0.9548	0.7592	1.3769	2.0028	1.2321	1.6874	1.4962
1354	arachidonoylcarnitine (C20:4)	Lipid	Fatty Acid Metabolism(Acyl Carnitine)	57518	LC/MS Pos Late	100015837	1353	448.342					1.2943	0.7332	1.5241	1.0995	0.7947	1.0446	0.5569	0.7044	0.848	0.4712	0.6011	1.0021	0.7291	1.0889	0.819	0.8961	1.479	0.9134	0.5479	0.6494	1.1898	0.8516	0.6621	0.6161	0.8348	1.0173	0.9751	0.9629	0.9273	1.3722	0.9188	1.0633	1.0256	1.3131	0.7422	1.0811	1.1668
1353	arachidoylcarnitine (C20)*	Lipid	Fatty Acid Metabolism(Acyl Carnitine)	57513	LC/MS Pos Late	100015833	1512	456.405				HMDB06460	0.8207	0.6502	0.9131	1.2596	1.1366	0.5917	0.6314	0.5191	0.681	0.4503	1.1514	0.9077	0.9898	1.0129	0.8266	0.5284	1.0272	0.6413	0.5686	0.6501	0.8771	0.7333	0.4652	0.6435	0.8819	1.1153	0.9376	1.049	1.2186	1.0692	0.8235	0.8971	1.0919	1.3449	0.8856	1.2095	0.9265
372	argininate*	Amino Acid	Urea cycle; Arginine and Proline Metabolism	57461	LC/MS Pos Early	100002769	2150	176.103	157-07-3	160437		HMDB03148	1.3287	1.1421	0.6566	0.8897	1.8056	1.052	1.5621	1.0395	1.3245	1.6117	2.1933	1.5481	1.2203	1.7905	1.532	0.9439	1.0637	0.8986	1.0259	1.694	1.0592	1.1305	0.9039	0.9487	0.8711	0.6633	1.2892	0.9989	0.5611	1.4155	0.9391	0.9992	1.5008	1.3302	1.4711	1.4563	0.8372
342	arginine	Amino Acid	Urea cycle; Arginine and Proline Metabolism	1638	LC/MS Pos Early	231	2825	175.119	1119-34-2	232	C00062	HMDB00517	1.5189	1.2617	0.9207	1.3085	1.2166	0.8012	1.1358	0.8856	1.147	0.909	0.9426	1.2377	1.4327	1.2634	1.0993	1.0009	1.067	1.1902	1.3719	1.0598	1.4643	1.3653	1.155	0.903	1.2612	0.8107	1.1572	0.9969	0.8077	0.8159	1.1387	1.2833	0.8974	0.982	1.1467	0.676	0.6505
343	argininosuccinate	Amino Acid	Urea cycle; Arginine and Proline Metabolism	15497	LC/MS Pos Early	232	2745	291.13	156637-58-0	828	C03406	HMDB00052	1.7721	1.2277	1.0527	1.4657	0.8655	0.4277	1.2241	1.0946	1.1094	0.5451	0.7847	1.3515	2.2447	3.2589	0.8165	0.4277	1.1828	0.4277	1.0963	0.945	1.5131	0.6043	0.8958	0.5909	0.7045	0.4988	0.8803	0.5027	0.4277	0.6508	1.1549	1.0784	0.4277	1.1672	0.6798	0.6375	0.8056
38	asparagine	Amino Acid	Alanine and Aspartate Metabolism	512	LC/MS Pos Early	917	1225	133.061	70-47-3	6267	C00152	HMDB00168	1.0099	0.783	1.9005	0.93	0.8987	1.385	0.7369	0.7153	0.9037	2.215	0.6542	0.7567	0.8917	0.8846	0.783	1.7474	0.6485	0.6736	0.6609	0.7569	1.0012	0.8425	0.7483	0.6308	0.7601	1.7244	0.6708	0.7935	0.7961	0.797	0.7555	0.8037	1.0722	0.865	0.9037	0.9141	0.8446
34	aspartate	Amino Acid	Alanine and Aspartate Metabolism	443	LC/MS Pos Early	234	1165	134.045	56-84-8	5960	C00049	HMDB00191	0.6599	0.8782	0.9835	0.7027	0.974	0.7337	0.8026	0.645	1.4589	1.516	0.947	0.7871	0.58	1.3191	0.7433	1.0337	0.7751	0.6872	0.6764	0.5347	1.1123	0.7559	1.0265	0.555	0.7432	1.5124	0.8999	0.9933	1.1596	0.9515	0.6687	0.7169	0.8152	1.1063	1.0641	0.8406	0.9868
1247	azelate (nonanedioate)	Lipid	Fatty Acid, Dicarboxylate	18362	LC/MS Neg	2029	1276	187.098	123-99-9	2266	C08261	HMDB00784	2.2246	0.8965	1.075	1.4061	1.047	0.7861	1.4387	1.2434	0.418	1.232	0.9107	1.4242	0.3647	1.0794	0.3647	1.1395	0.8121	0.7994	1.103	0.8084	0.3647	0.8415	1.319	0.732	0.8301	0.8513	1.6917	1.233	0.3647	0.991	0.3647	0.7399	0.3647	1.2514	0.9602	0.7265	1.3396
1133	behenate (22:0)*	Lipid	Long Chain Fatty Acid	12125	LC/MS Neg	314	6745	339.327	112-85-6	8215	C08281	HMDB00944	0.8084	0.93	0.7069	1.0959	0.8571	0.5971	1.2522	1.1244	0.9433	1.063	1.0192	0.9693	0.7417	0.7605	1.2862	1.1075	0.5907	0.7584	1.015	1.0486	1.129	0.7391	0.9638	0.6983	1.3816	0.7693	1.4965	1.2272	0.7507	0.8961	0.9234	0.6742	1.424	1.3724	1.7616	1.4088	0.7107
2255	behenoyl dihydrosphingomyelin (d18:0/22:0)*	Lipid	Sphingolipid Metabolism	57331	LC/MS Pos Late	100009026	3150	789.684				HMDB12091	1.0932	0.8189	0.541	1.2298	0.9822	0.993	1.0914	0.9833	1.4229	0.5815	1.2781	1.4533	1.3344	1.1187	1.092	0.7081	1.0218	1.3824	1.3098	1.008	1.2085	1.7984	1.0615	0.8574	1.2318	0.9576	1.1598	1.0533	1.096	1.463	1.0391	1.1395	1.6247	1.2524	0.9739	2.0501	1.869
2258	behenoyl sphingomyelin (d18:1/22:0)*	Lipid	Sphingolipid Metabolism	48492	LC/MS Pos Late	100006294	3083	787.669				HMDB12103	0.8847	0.8152	0.5828	1.0997	1.0712	0.7643	0.9787	0.9043	1.0557	0.5333	1.3008	1.0828	1.2307	1.0002	0.9383	0.6697	1.0464	1.2617	0.9613	0.9952	0.994	1.2928	1.0779	0.9765	1.01	0.6003	0.8897	0.8296	1.0509	1.1514	1.0374	1.0918	1.1263	1.0667	0.8069	1.6004	1.3255
1356	behenoylcarnitine (C22)*	Lipid	Fatty Acid Metabolism(Acyl Carnitine)	57514	LC/MS Pos Late	100015832	1561	484.436					1.0782	0.765	0.7514	1.122	1.0938	0.3384	0.5793	0.6144	0.3384	0.4868	0.841	1.1741	0.3384	1.0938	0.7259	0.5859	0.806	0.3384	0.3384	0.6411	0.707	0.6733	0.3384	0.3384	0.9556	0.3384	1.0779	0.8731	1.634	0.3384	0.6498	0.3384	1.1432	0.3384	0.6827	1.3712	0.958
3464	benzoate	Xenobiotics	Benzoate Metabolism	15778	LC/MS Neg	100000008	1750	121.029	65-85-0	243	C00180	HMDB01870	2.0435	0.2404	0.5366	0.7154	0.9921	0.8995	0.7365	0.684	1.1779	1.0803	0.8273	0.7671	1.2209	0.9586	0.6778	0.8396	0.8533	1.2328	0.7443	0.782	1.34	1.1485	1.3196	1.129	1.4813	1.2707	0.9944	0.782	1.3297	0.9871	1	1.2597	0.8764	0.7448	0.7163	1.1116	1.1201
259	beta-hydroxyisovalerate	Amino Acid	Leucine, Isoleucine and Valine Metabolism	12129	LC/MS Polar	1442	1149.8	117.056	625-08-1	69362		HMDB00754	1.1072	0.9321	1.1091	1.0521	1	0.7868	1.1536	0.9911	0.9788	0.8452	0.8989	0.9454	1.207	1.0045	0.8636	0.9369	1.1891	1.0937	1.1416	1.1987	1.1226	0.917	1.0534	0.7804	1.2426	0.7642	1.3857	1.0572	0.7826	0.8918	1.1527	1.3356	0.9439	0.8311	1.1211	0.9601	1.0983
6	betaine	Amino Acid	Glycine, Serine and Threonine Metabolism	3141	LC/MS Pos Early	799	1064	118.086	107-43-7	247	C00719	HMDB00043	0.9489	0.7789	1.6389	0.9129	1.1429	1.4001	0.9384	0.8063	1.0023	1.6316	1.0582	0.9565	0.7176	0.9286	1.0368	1.403	0.9745	0.7308	0.8938	0.8621	0.9682	0.756	0.9678	0.6372	0.7557	1.6802	0.9649	1.0382	0.9259	0.7912	0.8425	1.0045	0.9345	0.8403	1.2292	0.7823	0.5806
2561	beta-muricholate	Lipid	Primary Bile Acid Metabolism	31885	LC/MS Neg	100001066	4794	407.28	2393-59-1	5283853	C17726	HMDB00415	1.1116	0.6824	7.908	1.8262	0.9214	2.2597	0.3629	0.3983	0.0547	4.1388	0.1171	0.7178	0.7577	0.1329	0.2087	3.1431	0.3666	0.3388	0.2991	1.0012	0.2562	0.5384	0.0865	0.2355	0.5336	6.3399	1.0552	1.8408	0.5085	2.5283	0.5966	0.3972	0.6503	2.9404	4.8497	0.2748	1.4828
2392	beta-sitosterol	Lipid	Sterol	27414	LC/MS Pos Late	100001033	3054	397.383	83-46-5	222284	C01753	HMDB00852	1.6089	1.0769	1.1749	1.7514	1.0352	1.2439	1.2659	0.9028	1.1347	0.894	1.5067	1.2401	1.3294	1.2099	1.0735	0.5968	0.7584	0.9899	1	0.9879	0.8837	1.4075	1.0673	0.818	1.5718	1.5319	0.9334	1.0293	1.4718	1.3444	1.0015	1.0551	1.0116	1.5326	1.2799	0.8224	0.8471
3420	bilirubin (Z,Z)	Cofactors and Vitamins	Hemoglobin and Porphyrin Metabolism	43807	LC/MS Neg	1090	4796	583.256	635-65-4	5280352	C00486	HMDB00054	0.3635	0.2562	0.5575	0.0818	0.525	0.3627	0.3591	0.1692	0.2729	0.0818	0.3691	0.0958	0.7923	0.2699	0.2675	0.0818	0.3217	0.4729	0.0818	0.0818	0.4628	0.1593	0.1409	0.0818	0.2287	0.0818	0.1071	0.0818	0.0818	0.0818	0.0818	0.0818	0.3743	0.2706	0.0818	0.0818	0.0818
3421	bilirubin (E,E)*	Cofactors and Vitamins	Hemoglobin and Porphyrin Metabolism	32586	LC/MS Neg	100001950	4294	583.256	114-25-0	5315454			0.0948	0.165	0.7217	0.0948	0.1939	0.3046	0.0948	0.0948	0.0948	0.2569	0.0948	0.0948	0.1857	0.0948	0.0948	0.0948	0.0948	0.1968	0.0948	0.0948	0.0948	0.0948	0.0948	0.0948	0.0948	0.1335	0.0948	0.0948	0.0948	0.0948	0.0948	0.0948	0.0948	0.1417	0.0948	0.0948	0.0948
3423	biliverdin	Cofactors and Vitamins	Hemoglobin and Porphyrin Metabolism	2137	LC/MS Neg	250	4695.6	581.241	55482-27-4;55482-27-4	5353439	C00500	HMDB01008	0.2621	0.7534	1.1638	0.7155	0.6727	0.887	0.3332	0.846	0.3897	0.6407	0.8114	0.5728	1.0483	0.8238	0.8995	0.9295	0.4635	0.8393	0.8947	0.8714	0.7709	0.5423	0.8138	0.6302	0.7536	1.4703	0.515	0.6256	0.7337	0.6241	1.1941	0.7347	0.8528	0.9948	0.7172	0.7919	0.725
1304	butyrylcarnitine (C4)	Lipid	Fatty Acid Metabolism (also BCAA Metabolism)	32412	LC/MS Pos Early	100001054	2860	232.154	25576-40-3	439829	C02862	HMDB02013	0.5051	0.8115	1.1074	0.6022	0.8114	1.0042	1.2334	0.5938	0.5514	1.8466	0.8762	0.5388	0.5557	0.766	0.695	1.2538	0.6156	0.6488	0.9039	1.5839	0.8709	0.5832	0.8429	0.5477	0.6571	1.343	1.3794	0.7646	0.7422	0.6721	0.5487	0.645	1.0027	0.8188	1.0129	0.4783	0.6421
1305	butyrylglycine	Lipid	Fatty Acid Metabolism (also BCAA Metabolism)	31850	LC/MS Neg	100001151	1470	144.067	20208-73-5	88412		HMDB00808	0.7875	0.9709	0.6351	0.8111	1.2354	0.6212	1.0297	1.3326	1.4076	0.6252	1.6222	1.0669	1.368	2.6831	1.082	0.5114	1.2413	1.171	1.0123	1.5504	1.9795	1.0615	1.3394	2.3956	0.6814	0.5047	1.6511	1.085	1.3243	1.003	0.6292	1.0919	1.2703	1.2147	0.792	0.7902	1.7332
3553	caffeic acid sulfate	Xenobiotics	Xanthine Metabolism	53254	LC/MS Polar	100009337	1307	258.992				HMDB41708	1.5725	1.7263	0.8659	2.1852	1	1.1775	2.0931	1.6335	1.5394	1.5769	1.0548	0.8799	1.7417	1.0502	1.1972	1.7092	0.424	0.3953	1.9147	1.3188	1.2083	0.8017	1.0514	0.394	1.1677	0.8954	1.3281	0.9422	0.443	0.2917	0.8703	0.964	1.9994	0.5768	2.987	1.6954	0.4487
2394	campesterol	Lipid	Sterol	33997	LC/MS Pos Late	100001269	2873	383.367	474-62-4	173183	C01789	HMDB02869	1.5008	1.1622	1.1328	1.3691	1.1662	1.239	1.3735	0.9527	1.0057	0.8616	1.42	1.227	1.403	1.2203	1.0795	0.7964	0.9448	0.8816	1.0829	1.0672	0.8954	1.6307	1.1768	0.9403	1.6832	1.5346	1.1418	1.178	1.3348	1.38	0.9423	1.0491	1.2113	1.1764	1.2605	1.3298	0.8403
1093	caproate (6:0)	Lipid	Medium Chain Fatty Acid	32489	LC/MS Neg	926	2713.7	115.076	142-62-1	8892	C01585	HMDB00535	1.0831	1.254	1.0984	0.8683	0.9299	1.6255	1.0212	0.4064	1.1246	0.5993	1.4041	1.2371	1.1201	0.7069	0.6861	1.8255	1.4012	1.3853	1.2569	1.3003	0.9745	0.8684	1.766	1.1345	0.976	1.4648	1.0037	1.2623	1.023	1.6966	0.8911	1.3474	0.5484	1.3008	0.5299	1.2533	2.0944
53	carboxyethyl-GABA	Amino Acid	Glutamate Metabolism	40007	LC/MS Pos Early	100003260	2085	176.092	4386-03-02	2572		HMDB02201	0.6572	1.0831	1.0268	0.9895	0.9628	1.015	0.771	1.2053	1.0604	0.6061	1.426	0.7135	1.3001	1.1962	1.0326	1.0547	1.0711	0.8965	0.5637	1.1941	1.031	0.9139	1.393	0.6975	0.6538	0.7007	1.0193	0.8976	0.2899	0.2899	1.1019	0.7384	0.4941	0.8005	0.3631	0.5719	1.1208
1375	carnitine	Lipid	Carnitine Metabolism	15500	LC/MS Pos Early	100000007	1978	162.112	461-05-2	10917	C00318	HMDB00062	1.0024	0.9235	0.9923	1.0019	1.1112	1.0395	0.9064	0.9166	0.9321	1.1362	0.9698	1.0504	0.8976	0.9934	0.9495	1.1428	0.9295	0.8179	0.894	1.0829	0.9777	1.0584	0.9994	0.7062	0.912	0.9658	1.061	1.0713	0.9721	0.955	0.9622	1.0244	1.0543	0.989	1.2346	1.0631	0.7716
73	carnosine	Amino Acid	Histidine Metabolism	1768	LC/MS Pos Early	249	2942	227.114	305-84-0	439224	C00386	HMDB00033	1.5408	0.5908	1.2622	1.1702	1.2618	0.7556	1.0896	0.8709	0.5063	0.6754	1.0804	0.9722	0.6345	1.442	1.2697	0.5313	0.9453	0.8438	1.0281	0.9627	1.2213	0.8377	0.3882	0.7176	0.7799	1.3283	0.8337	1.2357	0.9502	1.0581	1.2528	0.9419	1.0412	1.2022	1.2242	1.0837	1.0444
3980	carotene diol (1)	Xenobiotics	Food Component/Plant	57635	LC/MS Pos Late	100015966	1720	568.428					0.8073	1.329	1.4419	1.199	1.6472	1.1273	1.7551	1.1115	0.9339	0.6281	1.4923	1.173	1.0671	0.7513	1.2916	0.7073	1.1176	1.1721	0.3206	1.4005	0.8998	1.1231	0.6867	0.7489	0.7431	0.7846	1.1882	1.4765	0.5918	0.5493	0.594	0.613	0.5265	1.4679	0.4185	0.7527	0.9142
3981	carotene diol (2)	Xenobiotics	Food Component/Plant	57636	LC/MS Pos Late	100015967	1904	568.428					1.2002	1.4932	1.4372	0.6858	2.2809	1.001	1.7089	0.3953	1.112	0.3942	1.7775	0.3942	0.3942	0.6942	1.2878	0.5524	1.5345	1.8843	0.3942	1.1925	1.9266	1.647	0.8615	0.3942	0.9173	0.5739	1.5097	1.5172	0.3942	0.4563	0.6759	0.5806	0.5485	1.2237	0.4739	0.3942	0.8332
3482	catechol sulfate	Xenobiotics	Benzoate Metabolism	35320	LC/MS Neg	100001605	1906	188.986	4918-96-1	3083879		HMDB59724	1.0074	1.0576	0.999	0.9031	1.4991	0.9663	1.0938	1.4399	1.645	1.589	1.3626	1.1052	1.7001	1.4821	1.2327	0.808	0.8978	0.5383	1.0273	1.2849	1.3277	0.7771	1.0509	0.5151	1.3133	0.8301	1.4709	0.9396	0.7766	0.5049	0.8734	0.6788	1.3472	1.2854	1.34	1.0253	1.1707
2639	ceramide (d18:1/20:0, d16:1/22:0, d20:1/18:0)*	Lipid	Ceramides	57440	LC/MS Pos Late	100015755	3920	594.582					0.5518	0.5007	0.9617	0.8954	0.7255	0.3764	0.6379	0.2458	0.2458	0.2458	0.899	0.5063	0.5726	1.0833	0.2458	0.2458	0.2458	0.2458	0.2458	0.5254	1.031	1.5699	0.5102	1.1086	0.9038	0.2458	0.9944	1.5325	1.7377	2.3126	0.2458	0.2458	1.3906	1.7295	1.3864	2.6035	1.2214
1369	cerotoylcarnitine (C26)*	Lipid	Fatty Acid Metabolism(Acyl Carnitine)	57516	LC/MS Pos Late	100015835	1649	540.499				HMDB06347	0.5462	0.5462	0.5462	0.5462	0.5462	0.5462	0.5462	0.5462	0.5462	0.5462	0.5462	0.5462	0.5462	0.5462	0.5462	0.5462	0.5462	0.5462	0.5462	0.5462	0.5462	0.5462	0.5462	0.5462	0.5462	0.5462	0.5462	0.5462	0.5462	0.5462	0.5462	0.5462	0.5462	0.5462	0.5462	0.5462	0.5462
201	C-glycosyltryptophan	Amino Acid	Tryptophan Metabolism	48782	LC/MS Pos Early	100006379	2700	367.15	180509-18-6	10981970			0.8753	0.5638	0.8445	0.856	0.8269	0.5885	0.6831	0.8408	0.6801	0.5033	0.7811	0.808	0.9125	0.7732	1.0037	0.5888	0.7808	0.6891	0.8329	0.9517	0.9981	0.9215	0.5456	0.6672	0.5571	0.9621	0.7638	0.7968	0.7873	0.8826	0.8436	0.843	0.7666	0.799	0.7475	1.0342	0.8312
2558	chenodeoxycholate	Lipid	Primary Bile Acid Metabolism	1563	LC/MS Neg	1123	5264	391.285	474-24-9;474-25-9	10133	C02528	HMDB00518	1.9097	0.4377	14.4969	0.9258	0.8786	1.8767	0.396	0.223	0.0629	13.5327	0.0629	0.4835	0.5099	0.0629	0.1274	12.4964	0.5652	0.0629	0.0629	0.5984	0.0629	0.0629	0.0629	0.0629	0.3001	11.1264	0.6715	0.9972	0.7041	2.0225	0.6162	0.2395	0.1961	2.3818	2.6675	0.2973	1.0054
2555	cholate	Lipid	Primary Bile Acid Metabolism	22842	LC/MS Neg	136	5165	407.28	81-25-4	221493	C00695	HMDB00619	2.1969	0.7074	22.7145	1.2167	0.7984	5.1916	0.3654	0.4923	0.0432	11.4722	0.0068	0.5803	0.4746	0.0353	0.0498	10.0656	0.2876	0.2062	0.2041	0.8495	0.1043	0.4063	0.0363	0.1305	0.2616	18.4328	1.055	1.0178	0.5785	2.4869	0.453	0.3987	0.0157	2.6438	2.9278	0.2356	1.5141
2369	cholesterol	Lipid	Sterol	63	LC/MS Pos Late	266	2707	369.352	57-88-5	11025495	C00187	HMDB00067	1.1878	0.9632	0.7683	1.2413	0.9691	0.8144	1.1909	0.7406	0.8437	0.7019	1.1557	0.9956	1.2764	0.9137	0.8448	0.7885	0.7886	0.9662	0.8694	0.9337	0.9499	1.2322	0.8716	0.7989	1.1945	0.8384	0.9379	0.9394	1.2326	1.1047	0.8272	0.9474	1.2087	1.2474	1.0594	1.3645	1.0077
1590	choline	Lipid	Phospholipid Metabolism	15506	LC/MS Pos Early	1256	1961	104.107	67-48-1	305	C00114	HMDB00097	0.8334	0.6212	1.087	0.8538	1.0415	1.0612	0.7019	0.8061	0.9555	0.8921	1.1053	1.0467	0.799	0.9494	0.8952	0.9931	0.9753	1.0891	0.8953	0.8249	0.909	0.9678	0.9093	0.8413	0.7607	0.9953	0.7623	0.8044	1.1903	0.8987	0.7931	0.7791	0.7662	0.7807	0.7721	0.7678	0.9052
3723	cinnamate	Xenobiotics	Food Component/Plant	12115	LC/MS Neg	1259	2878	147.045	140-10-3	444539	C00423	HMDB00930	0.627	0.8712	0.5264	0.3112	1.256	0.1701	0.1701	0.1701	0.5539	0.9018	0.2258	0.1701	1.4063	0.3312	0.7251	2.4302	1.1799	1.1605	0.1701	0.8886	2.0346	0.1701	1.714	0.4043	0.672	1	0.1701	1.3528	0.1701	1.0738	1.1409	0.6445	0.1701	0.8169	0.4322	0.1701	1.0067
3724	cinnamoylglycine	Xenobiotics	Food Component/Plant	38637	LC/MS Neg	100002253	3127	204.067	16534-24-0	709625		HMDB11621	0.6796	1.4186	0.2249	1.092	1.2004	0.227	0.4943	0.7166	0.4239	0.6617	0.5943	0.3808	2.9001	0.6952	0.8533	2.1471	2.1079	1.9703	0.0505	1.927	2.8878	0.2703	2.6427	0.5928	2.5186	0.9917	0.2945	2.7919	0.4963	1.5594	2.9922	1.3904	1.1579	1.2731	1.2811	0.1915	1.5281
1334	cis-4-decenoylcarnitine (C10:1)	Lipid	Fatty Acid Metabolism(Acyl Carnitine)	38178	LC/MS Pos Late	100002259	1057	314.233	98930-66-6				1.0662	0.6983	1.3988	0.9905	0.9237	1.0879	0.5331	0.5538	1.1483	0.6978	0.5726	0.707	0.6473	0.8479	0.7254	0.94	1.078	0.8597	0.5151	0.5436	1.3328	0.6648	0.8784	0.5824	1.0369	1.3677	0.9294	0.826	0.8243	0.9465	0.8039	0.9395	0.9444	1.4029	0.772	0.9536	1.5095
1053	citrate	Energy	TCA Cycle	1564	LC/MS Neg	1124	582	191.02	77-92-9	311	C00158	HMDB00094	0.8579	1.0033	1.0096	0.7855	0.7898	0.7648	0.9047	0.8445	0.7459	0.719	0.8935	0.7253	1.0625	1.0805	0.9151	0.7569	0.7887	0.8328	1.0369	0.8163	1.358	0.9949	1.2207	0.9973	0.9271	1.0433	1.0396	1.1063	0.6787	0.9504	1.1063	1.0368	0.8692	0.8687	0.8985	0.7254	0.9833
350	citrulline	Amino Acid	Urea cycle; Arginine and Proline Metabolism	2132	LC/MS Pos Early	391	1520	176.103	372-75-8	9750	C00327	HMDB00904	1.3672	0.9519	1.0057	1.0165	1.0606	0.8571	0.9416	0.8799	0.9651	1.0131	0.8223	0.9674	1.3181	0.9543	0.9168	0.9967	0.9442	0.9161	1.1613	0.972	1.4177	1.1305	0.9224	0.6951	1.1626	1.0778	1.0268	1.0716	0.7075	0.8989	1.1924	1.1518	1.0387	1.1563	1.3016	0.8887	0.8563
2455	corticosterone	Lipid	Steroid	5983	LC/MS Neg	272	5040	345.207	50-22-6	5753	C02140	HMDB01547	1.6437	1.4045	0.8261	0.996	0.5463	0.6524	1.2329	1.1836	1.5938	0.8293	1.3256	0.9033	2.0051	1.5057	1.561	0.824	1.5245	1.1994	1.3598	0.8163	2.0615	0.8779	1.4635	1.1164	1.2747	0.8119	1.4038	1.4634	1.0734	0.8329	1.399	1.0297	1.3304	0.8632	0.532	0.6966	0.924
374	creatine	Amino Acid	Creatine Metabolism	27718	LC/MS Pos Early	1221	1947	132.077	57-00-1	586	C00300	HMDB00064	1.0877	1.0331	1.1147	1.0178	1.1564	0.8411	1.2418	0.9077	0.7598	0.9881	0.8272	1.0067	1.2628	2.9694	0.8189	0.6789	0.7996	0.8727	0.8383	1.1486	1.127	0.8762	0.7795	0.8784	0.6635	0.9559	0.9312	0.7701	0.8777	0.8671	0.8237	0.8291	0.8668	1.1337	0.8718	0.9328	1.1107
375	creatinine	Amino Acid	Creatine Metabolism	513	LC/MS Pos Early	275	2055	114.066	60-27-5	588	C00791	HMDB00562	1.0316	0.9094	1.1303	1.0534	1.0502	0.9988	1.0216	1.0121	0.9755	0.8094	0.9345	1.1265	1.1558	1.2258	0.9907	0.951	1.0758	0.9588	1.0601	1.0497	1.2231	1.0828	1.0444	1.0541	0.938	1.0188	1.0284	1.0608	1.0126	1.0913	1.0459	1.0795	0.994	0.988	0.9656	1.0285	1.214
323	cysteine	Amino Acid	Methionine, Cysteine, SAM and Taurine Metabolism	1868	LC/MS Pos Early	800	1488	122.027	52-90-4;56-89-3	5862	C00097	HMDB00574	1.1929	0.8604	1.2107	1.2709	0.7861	0.9011	0.9358	0.8991	0.7698	0.8805	0.9496	1.2243	0.8261	1.0036	1.0858	1.1782	0.7888	0.7281	1.0908	1.1095	0.8644	0.9083	0.8646	0.7018	0.5936	0.6819	0.9308	1.3192	0.6995	0.8764	1.0227	0.9046	0.6795	0.8018	0.7164	0.9951	0.5652
328	cysteine s-sulfate	Amino Acid	Methionine, Cysteine, SAM and Taurine Metabolism	22176	LC/MS Pos Early	100000808	565	201.984	1637-71-4	115015	C05824	HMDB00731	1.1794	0.933	6.297	1.4503	1.2919	3.1895	0.9587	1.2614	1.0615	3.4458	0.907	1.041	1.6499	1.003	1.3009	5.483	0.8031	1.275	1.1284	0.8609	1.7295	1.514	1.1125	1.4043	1.1159	2.7711	0.8649	0.784	0.5974	0.84	0.9266	1.2626	0.8933	0.8056	0.604	0.8939	0.7984
404	cysteine-glutathione disulfide	Amino Acid	Glutathione Metabolism	35159	LC/MS Pos Early	100001437	2465	427.095	13081-14-6	4247235		HMDB00656	1.1932	0.8908	0.6708	1.3135	0.9368	0.6137	1.2001	1.1994	0.9749	0.5696	1.2079	1.3948	1.2389	1.4886	0.9461	0.2462	1.7782	0.8408	1.1337	1.1038	1.2354	0.8766	0.9717	0.7578	0.5988	0.4799	1.0916	0.9219	1.4038	0.8142	1.0007	0.8633	0.5457	1.1561	0.6904	0.976	0.922
329	cystine	Amino Acid	Methionine, Cysteine, SAM and Taurine Metabolism	56	LC/MS Pos Early	279	2000	241.031	56-89-3	67678	C00491	HMDB00192	1.6564	0.6166	1.073	2.4614	1.406	0.6759	0.8629	0.9035	2.5679	0.5622	1.0526	1.8427	3.7269	1.1466	0.9966	0.2772	4.9348	0.8079	1.0558	0.8086	0.7179	0.8666	0.6491	0.4598	0.6716	0.2324	0.7513	0.9795	3.852	0.5326	0.975	0.6678	0.3629	0.5642	0.2311	1.1243	0.5431
3309	cytidine	Nucleotide	Pyrimidine Metabolism, Cytidine containing	514	LC/MS Pos Early	827	2124	244.093	65-46-3	6175	C00475	HMDB00089	0.8824	0.9485	1.7141	1.288	1.6379	1.6236	1.0669	1.28	1.2283	1.4489	1.6882	1.4513	1.0617	1.9596	0.9389	1.4914	1.7091	1.5363	1.2605	1.624	1.3794	1.1985	1.2142	1.2669	0.6839	1.1986	0.9427	1.1609	1.6585	1.6769	1.1583	1.043	1.0758	1.3481	1.0323	1.2144	1.851
3310	cytosine	Nucleotide	Pyrimidine Metabolism, Cytidine containing	573	LC/MS Pos Early	881	2060	112.051	71-30-7	597	C00380	HMDB00630	1.5655	1.5066	0.5402	0.26	0.5268	0.5206	0.8903	1.005	0.8912	1.5149	1.0964	0.6865	1.4064	0.7091	0.7879	0.26	0.26	0.5296	1.6576	0.9004	0.5134	0.7505	1.6676	0.5993	0.9563	0.4811	0.8547	1.6199	0.3439	0.7835	2.5692	1.6031	0.8121	1.1722	0.9723	0.26	0.7241
3741	daidzein	Xenobiotics	Food Component/Plant	32453	LC/MS Neg	100001219	3566	253.051	486-66-8	5281708	C10208	HMDB03312	1.1547	0.9129	1.2516	0.7155	2.0235	1.3548	1.5634	1.6309	1.1813	2.7493	1.0001	0.8266	1.628	2.0335	1.3555	0.8139	0.7069	0.7237	0.8912	1.1966	0.9999	0.7371	0.9723	0.7903	0.9235	1.4665	1.3066	0.5622	0.3527	0.134	0.4769	0.8124	0.9981	0.8712	2.1622	1.1843	0.6171
3927	daidzein sulfate (1)	Xenobiotics	Food Component/Plant	48727	LC/MS Neg	100006362	2843	333.007					1.1055	0.9497	1.7532	0.5224	1.9663	1.455	1.38	1.9342	1.445	3.9593	1.1333	0.6074	1.8025	2.0277	2.0872	2.3703	0.4449	0.8743	0.9965	1.3992	1.7331	0.8169	1.3101	0.9151	0.8353	2.7472	1.7212	0.5692	0.2156	0.1359	0.635	0.9428	1.6113	1.6841	2.7158	1.0572	0.5705
3922	daidzein sulfate (2)	Xenobiotics	Food Component/Plant	48728	LC/MS Neg	100006363	3330	333.008					1.7166	0.972	1.8181	1.0343	2.194	1.2223	2.0247	1.7962	1.6234	3.2069	1.023	1.021	2.0665	2.302	1.4454	1.8701	0.5791	1.0685	1.3139	1.685	1.6058	0.8017	1.0079	0.6514	1.5512	2.0908	1.4104	0.7917	0.4983	0.172	1.1215	0.8378	1.9857	2.2337	3.6108	1.2564	0.6357
1332	decanoylcarnitine (C10)	Lipid	Fatty Acid Metabolism(Acyl Carnitine)	33941	LC/MS Pos Late	100001251	1130	316.248	1492-27-9	10245190		HMDB00651	0.6894	0.866	2.5351	0.7031	0.6947	1.082	0.4407	0.4346	0.5993	0.8425	0.9714	0.5533	0.6708	1.1123	0.8129	1.8097	1.0177	1.1501	0.782	0.7249	1.1052	0.713	1.9348	0.6135	1.039	1.2803	0.9883	1.0077	0.8551	1.3932	0.8903	0.7015	0.6675	1.148	0.7118	0.5852	1.7425
1374	deoxycarnitine	Lipid	Carnitine Metabolism	36747	LC/MS Pos Early	100001662	2052	146.118	6249-56-5	134	C01181	HMDB01161	0.8234	0.7196	1.4219	0.7601	1.0201	1.5276	0.8802	0.9723	1.2624	1.6081	0.9815	0.9013	0.7797	1.2189	1.0774	1.6588	0.8492	0.7366	0.7979	0.8442	1.0215	0.8318	1.1277	0.6871	0.6535	1.2877	0.8995	0.8759	0.7334	1.0135	0.7097	0.827	1.1011	0.8807	1.3819	1.0519	0.9245
2572	deoxycholate	Lipid	Secondary Bile Acid Metabolism	1114	LC/MS Neg	302	5294	391.285	83-44-3	222528	C04483	HMDB00626	0.845	0.6749	8.3702	0.4027	0.7411	3.4234	0.4686	0.7153	0.3912	8.5387	0.2508	0.3791	0.5001	0.1377	0.4333	11.1642	0.6899	0.8847	0.474	1.1522	0.594	0.7007	0.206	0.2505	0.6934	6.596	0.919	1.0445	0.8145	1.5017	0.6637	0.649	0.8202	1.6945	1.1917	0.2871	0.9868
2164	diacylglycerol (16:1/18:2 [2], 16:0/18:3 [1])*	Lipid	Diacylglycerol	54966	LC/MS Pos Late	100010940	2733	608.525					1.1562	1.1358	0.7338	0.6471	1.16	1.1409	2.4575	1.5693	0.2064	0.3957	1.3508	0.8887	3.1422	1.3429	0.5364	0.3677	0.2064	0.8154	0.2489	2.3808	0.2064	1.0359	0.4897	1.1598	0.8082	0.2064	0.4911	0.2064	0.9886	1.2372	0.2064	0.2064	1.4321	2.0531	1.1752	0.8036	0.9745
1161	dihomo-linoleate (20:2n6)	Lipid	Polyunsaturated Fatty Acid (n3 and n6)	17805	LC/MS Neg	1231	5730	307.264	2091-39-6	6439848	C16525	HMDB05060	1.2218	1.0365	0.8393	1.5224	1.0028	1.1986	1.1762	0.9931	1.2152	0.8738	0.9972	0.9279	1.3077	1.1197	0.7139	0.8875	0.9505	0.8982	0.7502	1.0628	0.7666	0.6737	0.8908	0.7213	1.4924	0.8379	0.9091	0.8555	1.0156	0.9623	0.938	0.7492	1.3787	2.0538	1.3782	1.453	1.39
1156	dihomo-linolenate (20:3n3 or n6)	Lipid	Polyunsaturated Fatty Acid (n3 and n6)	35718	LC/MS Neg	100001739	5596	305.249	17046-59-2	5280581	C03242	HMDB02925	1.5253	1.3675	0.6419	1.6398	1.4411	1.0695	1.3252	1.1347	1.6035	0.7239	0.9979	1.0752	1.6526	1.2346	0.8983	0.8234	1.235	1.2706	0.9724	1.0881	1.0466	0.9132	1.0002	0.9294	1.9517	0.7713	0.9712	0.9234	1.421	1.3532	1.0081	0.8382	1.8022	2.9165	1.7134	1.7746	1.6611
1357	dihomo-linolenoylcarnitine (20:3n3 or 6)*	Lipid	Fatty Acid Metabolism(Acyl Carnitine)	57521	LC/MS Pos Late	100015840	1392	450.358					1.2951	0.8825	1.5299	1.0585	0.8399	1.2473	0.4352	0.6618	0.8444	0.6891	0.6163	0.9329	0.7431	0.8949	0.7275	0.8652	1.1749	0.9074	0.5268	0.5658	0.9952	1.0416	0.6434	0.7392	0.8332	1.2397	0.9574	0.9353	1.2551	1.4463	0.8156	0.9703	0.8555	1.2704	0.6648	1.021	1.2584
1358	dihomo-linoleoylcarnitine (C20:2)*	Lipid	Fatty Acid Metabolism(Acyl Carnitine)	57520	LC/MS Pos Late	100015839	1436	452.373					1.02	0.5598	1.186	1.0237	0.7848	0.8947	0.5127	0.5621	0.7807	0.6597	0.7191	0.9327	0.7479	0.9546	0.6271	0.7278	0.949	0.6933	0.4171	0.4853	0.9772	0.8147	0.7616	0.624	0.7304	1.0807	0.8822	0.7567	1.2072	1.126	0.6247	0.8903	0.8015	1.172	0.6656	1.0157	1.0982
3405	dihydrobiopterin	Cofactors and Vitamins	Tetrahydrobiopterin Metabolism	35129	LC/MS Neg	100001506	1552.3	194.068	6779-87-9	1879	C00268	HMDB00038	0.6472	0.665	0.8206	0.6911	1.0457	0.8508	0.6193	0.8621	0.6732	0.7502	0.9904	0.8681	1.6387	1.0901	1.0091	0.3914	0.9984	0.9792	0.9573	0.9049	1.3191	0.6981	0.6048	0.4775	0.9038	0.6498	0.9123	0.7042	1.2669	0.5991	0.698	0.7312	1.152	1.0819	0.8554	0.7273	1.0268
3268	dihydroorotate	Nucleotide	Pyrimidine Metabolism, Orotate containing	601	LC/MS Polar	923	1910	157.025	155-54-4	648	C00337	HMDB03349	0.531	0.4928	0.6015	0.4056	0.2039	0.3606	0.8132	0.2645	0.1771	0.4882	0.1771	0.3171	1.2324	0.1771	0.3053	0.5614	0.3106	0.1771	0.9996	0.6805	0.3841	0.2684	0.1821	0.236	0.5715	0.5674	0.5404	0.5737	0.6814	0.8545	0.9803	0.3461	0.9614	0.8193	1	0.5462	0.4768
4439	dimethyl sulfone	Xenobiotics	Chemical	43424	LC/MS Pos Early	100004284	832	95.0161	67-71-0	6213	C11142	HMDB04983	1.2257	0.3833	1.1927	0.8595	1.3755	0.143	0.8836	0.8905	1.5427	1.0351	0.564	1.0068	0.8937	0.6373	0.9398	0.6938	1.1064	0.7431	0.143	1.2721	0.7546	0.9954	0.4394	0.3397	1.1286	0.4381	1.753	0.143	0.4033	0.8951	0.7932	1.0991	0.401	0.8203	0.8869	0.8606	0.7958
356	dimethylarginine (SDMA + ADMA)	Amino Acid	Urea cycle; Arginine and Proline Metabolism	36808	LC/MS Pos Early	100001810	2850	203.15	102783-24-4	123831	C03626	HMDB01539	0.794	0.7653	0.7457	0.7312	0.8187	0.7053	0.5764	0.5601	0.6384	0.6107	0.6617	0.6699	1.062	0.7892	0.7259	0.6437	0.7269	0.8957	0.836	0.5819	1.0009	0.8737	0.6673	0.6535	0.8888	0.7624	0.7567	0.7801	0.6703	0.7766	0.7057	0.938	0.9104	0.7163	0.8021	0.6138	0.8649
5	dimethylglycine	Amino Acid	Glycine, Serine and Threonine Metabolism	5086	LC/MS Pos Early	806	1104	104.071	1118-68-9	673	C01026	HMDB00092	0.889	0.6622	0.7834	0.8327	0.8612	0.5996	0.9804	0.6352	0.6986	0.6708	0.763	0.7092	0.7587	0.6559	0.8593	0.5834	0.8681	0.6745	0.9338	0.7977	0.8641	0.6083	0.7163	0.4574	0.6339	0.6964	0.9545	0.7911	0.5024	0.5658	0.8902	0.7979	0.8548	0.6051	0.8435	0.6276	0.5764
1160	docosadienoate (22:2n6)	Lipid	Polyunsaturated Fatty Acid (n3 and n6)	32415	LC/MS Neg	100001182	6034	335.296	7370-49-2	5282807	C16533	HMDB61714	0.7879	0.6876	0.874	1.2616	0.924	1.0147	0.95	0.7465	1.0577	0.9544	0.9703	1.0192	0.8837	1.0047	0.7411	0.8033	0.7956	0.7358	0.6476	0.7541	0.5842	0.5651	0.6903	0.5166	1.0676	0.8879	0.8389	0.7608	0.9062	0.8962	0.7819	0.4852	1.0719	1.8163	0.9512	1.5128	1.5341
1148	docosahexaenoate (DHA; 22:6n3)	Lipid	Polyunsaturated Fatty Acid (n3 and n6)	44675	LC/MS Neg	100000665	5525	327.233	6217-54-5	445580	C06429	HMDB02183	1.9723	1.0605	0.6683	1.6665	1.62	1.3095	1.2605	0.8749	2.0443	0.6951	0.9897	1.2289	1.592	1.3951	0.7853	0.7177	1.3477	1.0372	0.7061	0.9503	1.099	0.8429	0.9827	0.7548	1.5209	0.5759	0.8464	0.8051	1.0842	1.0529	1.0848	0.7932	1.0845	2.2242	0.9611	1.3442	1.4517
1364	docosahexaenoylcarnitine (C22:6)*	Lipid	Fatty Acid Metabolism(Acyl Carnitine)	57523	LC/MS Pos Late	100015845	1349	472.342					1.0622	0.4975	1.837	0.786	0.8716	1.2597	0.3827	0.3827	1.0599	0.3827	0.4959	1.035	0.3827	1.1663	0.6176	0.3827	1.2043	0.9933	0.3827	0.4549	0.8661	1.314	0.3827	0.3827	0.7858	0.8142	0.5575	0.7741	0.8268	1.2322	0.8118	0.9598	0.6515	1.3424	0.3827	0.8288	1.0256
1147	docosapentaenoate (n3 DPA; 22:5n3)	Lipid	Polyunsaturated Fatty Acid (n3 and n6)	32504	LC/MS Neg	100001181	5571	329.249	2234-74-4	6441454	C16513	HMDB06528	1.4178	1.1556	0.5344	1.5144	1.4138	1.0605	1.042	1.0192	1.6352	0.4751	1.3784	0.9871	1.7276	1.2013	0.6984	0.6462	1.0406	1.1529	0.5745	0.8477	0.8212	0.8539	1.1781	1.0527	1.5868	0.5076	0.7965	0.7886	1.0466	1.2082	0.9159	0.7787	1.2574	2.2623	1.0684	1.8198	1.4838
1159	docosapentaenoate (n6 DPA; 22:5n6)	Lipid	Polyunsaturated Fatty Acid (n3 and n6)	37478	LC/MS Neg	100001580	5624.5	329.249	25182-74-5	6441454	C16513	HMDB01976	1.062	0.8691	1.27	1.3239	1.1969	1.5453	1.2855	0.9212	1.539	1.2379	0.7636	0.9185	1.3585	0.8849	0.8126	1.051	1.0027	0.9849	0.6138	0.8535	0.7741	0.7304	0.747	0.4885	1.398	1.0816	0.8145	0.688	0.8374	0.9081	0.8922	0.6039	1.3027	2.3214	1.4227	1.3043	1.3931
4442	EDTA	Xenobiotics	Chemical	22163	LC/MS Neg	100001002	643	291.083	60-00-4	6049	C00284	HMDB15109	1.0253	1.0499	0.9365	0.942	0.9515	0.9463	0.9207	0.9235	1.0032	0.9195	0.9285	0.9632	0.9845	0.9367	1.0354	1.0667	1.0118	1.0715	1.0435	0.9557	1.1271	1.0786	1.0552	1.029	1.1131	1.0564	1.0546	1.0622	1.0023	1.0443	1.0536	1.0819	1.1224	0.9595	1.0463	0.9309	0.9569
1255	eicosanodioate	Lipid	Fatty Acid, Dicarboxylate	39831	LC/MS Neg	100002951	5200.9	341.27	2424-92-2	75502			0.8141	0.9436	1.2019	1.0027	1.1337	1.0287	0.7143	1.1064	0.6054	1.2554	1.0662	0.9437	0.7251	0.9659	0.8974	1.1101	0.8374	0.5576	0.7091	0.8627	0.8162	0.9719	0.8612	0.7076	0.7774	0.8253	0.9864	1.3587	0.6709	1.0056	0.8781	0.6941	0.8521	1.2123	1.0832	0.929	0.8649
1146	eicosapentaenoate (EPA; 20:5n3)	Lipid	Polyunsaturated Fatty Acid (n3 and n6)	18467	LC/MS Neg	2050	5450	301.217	10-2005-9;10417-94-4	446284	C06428	HMDB01999	1.4922	1.3887	0.5095	1.5084	1.3084	1.0602	1.3065	1.1781	1.6126	0.5287	1.3652	1.1836	2.1621	1.3606	0.7935	0.9262	1.1882	1.2565	0.8481	1.0636	1.0801	1.1047	1.2334	1.4143	1.8197	0.4679	0.961	0.9302	1.3725	1.5333	1.0004	0.9545	1.5827	1.9577	1.2805	1.872	2.0219
1129	eicosenoate (20:1)	Lipid	Long Chain Fatty Acid	33587	LC/MS Neg	100001335	5950	309.28		5282768	C16526	HMDB02231	1.071	1.1002	0.792	1.7118	1.2724	1.147	1.1741	1.0288	1.2832	0.9791	1.6944	0.7924	1.2956	1.183	1.1034	1.1873	1.3078	1.3508	0.8723	1.135	1.2732	0.7758	0.9618	0.9923	1.8001	0.8501	1.0855	1.0846	1.0768	1.3008	1.0014	0.6561	1.3302	2.5719	1.4103	2.4542	1.8553
1359	eicosenoylcarnitine (C20:1)*	Lipid	Fatty Acid Metabolism(Acyl Carnitine)	57519	LC/MS Pos Late	100015838	1484	454.389					1.2049	0.8613	1.3226	1.4216	1.0448	0.883	0.5599	0.6005	0.844	0.488	0.7739	1.0039	1.0405	0.9961	0.7718	0.5809	1.1773	0.794	0.5416	0.5963	1.0842	1.2363	0.5524	0.7067	0.9858	1.0182	0.9793	1.2777	1.1805	1.469	0.795	1.0311	0.9878	1.579	0.7308	1.2489	1.1804
3753	equol glucuronide	Xenobiotics	Food Component/Plant	41948	LC/MS Neg	100003895	3215	417.119					0.2714	1.4261	1.9176	0.8879	1.0011	1.068	0.3041	2.4334	0.5993	1.0717	1.4881	1.3668	3.0496	1.8849	2.0866	1	0.6321	0.9719	1.7499	2.5287	1.6937	1.3735	0.7582	0.8096	1.4038	0.9987	1.7383	1.3067	0.9679	0.5587	1.5253	0.8517	1.7805	1.212	1.2218	0.5141	0.8955
3754	equol sulfate	Xenobiotics	Food Component/Plant	40478	LC/MS Neg	100003429	3630	321.044					0.2797	1.5463	2.3594	1.1159	0.9415	1.0082	0.3176	1.5068	0.5338	0.8628	0.6519	1.217	2.5456	0.7481	1.2318	1.7244	0.7166	1.1365	1.5202	2.2914	2.0223	0.8886	0.7523	0.5314	1.8286	0.8403	1.7299	1.5332	0.9531	0.737	1.5823	0.93	1.4204	1.4159	1.0552	0.6701	0.8224
3755	ergothioneine	Xenobiotics	Food Component/Plant	37459	LC/MS Pos Early	100002154	850	230.096	58511-63-0	3032311	C05570	HMDB03045	0.5566	0.8742	1.1342	0.7284	0.9038	1.207	0.7633	1.0582	1.0897	1.3411	1.1868	0.8193	1.2087	1.1011	1.0476	1.5801	0.8186	0.799	1.3747	0.855	1.6264	1.4735	1.3746	1.3426	1.0844	1.8677	1.0375	1.151	1.2764	1.3711	1.2475	1.2809	1.1546	1.0181	0.9923	1.0153	0.7009
1134	erucate (22:1n9)	Lipid	Long Chain Fatty Acid	1552	LC/MS Neg	1087	6355.6	337.311	112-86-7	5281116	C08316	HMDB02068	1.0196	1.0689	0.7443	1.1616	1.2328	0.939	1.0114	0.8642	1.1243	1.1551	1.0724	0.7064	0.8747	0.7606	0.8977	1.068	0.9747	0.9491	1.0309	0.7434	0.837	0.7646	1.1135	0.8733	1.9182	0.8979	1.1578	0.9922	0.8448	1.3197	1.1249	0.6044	1.6209	1.8547	1.0069	2.2084	1.6493
1360	erucoylcarnitine (C22:1)*	Lipid	Fatty Acid Metabolism(Acyl Carnitine)	57525	LC/MS Pos Late	100015841	1535	482.42					0.7751	0.4517	0.7612	1.415	0.7557	0.4517	0.4517	0.4517	0.4517	0.4517	0.4517	1.2941	0.4517	0.6733	0.4517	0.4517	0.9652	0.4517	0.4517	0.4517	0.4517	0.4517	0.4517	0.5482	0.4517	1	0.8243	0.9171	1.0623	0.4517	0.5044	0.9295	0.4517	1.3521	0.7226	1.692	1.0971
3757	erythritol	Xenobiotics	Food Component/Plant	20699	LC/MS Polar	100000846	1491	167.056	149-32-6	222285	C00503	HMDB02994	0.9244	0.929	1.0296	1.0826	0.8427	0.6457	1.1252	0.9556	0.7087	0.7489	0.9722	1	1.0822	0.9367	1.0246	0.794	0.9624	0.9168	1.1818	1.0532	0.8807	0.8091	0.9778	0.7615	0.9661	0.8169	1.1128	1.0341	0.7232	0.9303	1.1753	0.8505	0.8934	0.9531	1.3865	0.8013	0.9863
1046	erythronate*	Carbohydrate	Aminosugar Metabolism	42420	LC/MS Polar	100001320	2186	135.03	88759-55-1	2781043		HMDB00613	0.7269	0.7598	0.8715	0.3434	0.7496	0.5887	0.7974	0.8879	0.7304	0.5203	0.9432	0.8903	0.8008	0.8634	0.8453	0.5116	0.7585	0.8596	0.7975	0.8667	0.9191	0.7974	0.9135	0.9407	0.5997	0.607	1.0403	0.9745	0.8658	1.0949	0.8332	0.7724	0.9342	0.9642	0.8846	0.8165	0.8625
4381	ethyl glucuronide	Xenobiotics	Chemical	39603	LC/MS Neg	100002849	793	221.067	17685-04-0	152226		HMDB10325	0.9192	1.4974	2.7081	5.3257	2.4904	2.2379	0.3645	1.4641	1.6876	2.2063	1.7592	1.0279	0.5982	1.0917	0.6538	0.5126	1.4663	1.0899	0.0539	0.2428	1.0476	0.9406	1.0354	1.0412	0.0715	0.506	1.0994	1.9383	1.3827	1.3209	0.2568	0.4173	1.7035	1.9444	2.0477	2.4114	2.2816
288	ethylmalonate	Amino Acid	Leucine, Isoleucine and Valine Metabolism	15765	LC/MS Polar	2054	2785	131.035	601-75-2	11756		HMDB00622	0.8656	1.0888	1.4772	0.8965	1.0023	0.8443	0.96	1.0571	1.006	0.8246	0.874	0.7324	1.2327	1.4759	0.996	0.7814	0.8536	1.0802	0.8501	1.0003	1.649	0.9106	1.229	1.3988	0.6246	0.8913	1.0822	1.0288	0.8417	0.9792	0.898	0.8504	0.9576	1.1785	0.8081	1.0476	1.2715
3364	flavin adenine dinucleotide (FAD)	Cofactors and Vitamins	Riboflavin Metabolism	2134	LC/MS Neg	327	2425	784.15	146-14-5;84366-81-4	643975	C00016	HMDB01248	0.7294	0.6543	0.6569	0.9994	1.059	0.5862	0.5336	0.7738	0.6752	0.706	0.8679	0.759	1.0547	1.0504	0.4742	0.3042	0.6424	1.1174	0.8102	0.8199	0.7898	0.7989	0.6015	0.8802	0.9571	1.2162	0.8087	1.0439	1.3979	1.2521	0.6425	0.7575	1.5017	1.32	1.3057	1.3455	1.3266
3759	ferulate	Xenobiotics	Food Component/Plant	35630	LC/MS Neg	100001542	1755	193.051	537-98-4	445858	C01494	HMDB00954	2.4582	0.9899	1.1352	0.8935	1.2628	1.0948	1.6392	1.2198	2.3649	2.9279	0.5569	0.6303	2.2671	0.79	1.1705	1.0437	0.5458	0.2781	1.9105	1.126	0.2781	0.8801	0.6136	0.2781	1.2443	2.0878	0.8673	1.0561	0.4632	0.3379	1.3449	0.9845	1.6358	1.1675	1.3974	1.3329	0.3005
3760	ferulic acid 4-sulfate	Xenobiotics	Food Component/Plant	47114	LC/MS Neg	100005389	1225	273.007	86321-29-1	6305574		HMDB29200	1.3232	1.3975	1.0079	1.0095	1.2142	0.6818	1.1566	1.6509	0.9165	1.3761	0.6711	0.9408	2.6982	1.8622	1.4624	0.797	0.4729	0.3487	2.671	1.3101	1.533	0.9528	1.275	0.4747	1.6203	1.5558	1.457	1.5733	0.4842	0.4345	1.7875	1.6564	2.6244	1.1532	2.3118	0.6995	0.3461
71	formiminoglutamate	Amino Acid	Histidine Metabolism	43493	LC/MS Pos Early	100002500	1880	175.071	816-90-0	439233	C00439	HMDB00854	1.503	0.9911	0.7936	0.9634	1.2142	0.8797	1.3528	0.7612	1.0014	0.9268	1.6288	1.0482	1.1949	0.9969	1.1637	0.7108	1.3245	0.8156	1.3881	0.8692	0.9312	1.0525	1.1634	0.6945	0.9586	0.9668	1.0132	0.9491	0.5706	1.2616	1.2225	0.9413	1.1688	0.9472	1.2745	1.1809	1.434
971	fructose	Carbohydrate	Fructose, Mannose and Galactose Metabolism	577	LC/MS Polar	878	2022.2	179.056	57-48-7	5984	C00095	HMDB00660	0.7784	0.3199	1.3886	0.846	0.9026	0.8925	1.0263	0.9988	1.1314	1.1559	0.9309	0.6396	0.9349	1.0995	0.5145	0.8755	0.6422	0.5302	1.2437	1.0924	1.4486	0.6844	0.5897	0.8778	0.8996	0.7566	0.4999	0.63	0.9027	0.8017	0.7741	0.9586	1.269	0.7911	1.0028	0.6703	0.5958
1063	fumarate	Energy	TCA Cycle	1643	LC/MS Polar	330	3084	115.004	100-17-8	444972	C00122	HMDB00134	0.9656	1.4261	1.9476	0.8918	1.4763	0.9612	1.2053	1.3325	1.1732	0.9958	1.3353	0.8542	1.4014	1.9174	1.1482	1.0267	1.221	0.909	1.4238	1.2816	1.8084	1.0185	1.7623	1.49	0.758	1.0987	1.0219	0.9232	0.6764	0.6442	1.2391	1.1461	0.7472	0.7488	0.7171	0.6676	1.0102
996	galactonate	Carbohydrate	Fructose, Mannose and Galactose Metabolism	27719	LC/MS Polar	100001026	3085	195.051	299-28-5	128869	C00880	HMDB00565	1.3613	0.692	0.7963	0.7335	0.9956	0.484	0.9227	1.1097	1.0043	0.9662	0.2465	1.1661	0.8427	1.1051	0.6895	0.7947	0.8734	0.4456	0.8084	0.7921	0.8139	0.6382	0.7574	0.7254	0.647	0.6667	1.0927	1.2861	0.6204	0.6802	0.9694	0.6509	0.9248	0.8901	1.2667	1.1576	0.6555
421	gamma-glutamylalanine	Peptide	Gamma-glutamyl Amino Acid	37063	LC/MS Pos Early	100001843	1986	219.098	5875-41-2	440103		HMDB29142	1.4495	0.6315	0.9589	1.1186	0.7308	0.9279	1.2604	1.1141	0.6145	1.0723	1.0642	0.7791	1.3205	1.1855	0.6884	0.255	1.0021	0.6116	0.8333	0.8942	1.3584	0.6231	0.9979	0.7099	0.845	1.0722	0.7395	0.7334	0.9329	0.8361	0.8249	0.8768	1.2297	0.925	1.5327	1.4854	0.8911
429	gamma-glutamyl-alpha-lysine	Peptide	Gamma-glutamyl Amino Acid	55015	LC/MS Pos Early	100010901	2784	276.155		65254			1.4413	0.8442	0.6966	1.3737	0.698	0.4384	0.9769	0.8674	0.9101	0.5043	0.657	0.7219	1.0061	1.2934	0.8223	0.4193	0.7489	0.7153	0.8527	0.8169	1.2746	0.8171	0.8567	0.6617	0.6904	0.7767	1.0076	0.975	0.4825	0.628	1.1755	1.2368	0.8123	0.9014	1.0498	0.7735	0.6952
423	gamma-glutamylglutamate	Peptide	Gamma-glutamyl Amino Acid	36738	LC/MS Pos Early	331	1775	277.103	1116-22-9	92865	C05282	HMDB11737	0.6174	0.6927	1.0071	0.782	0.6459	0.5418	0.5567	0.6509	0.7341	0.6571	0.7495	0.6558	0.7651	1.066	0.7466	0.8897	1.0882	0.5658	0.9407	0.8168	1.1281	0.836	1.1159	0.961	0.6495	1.4031	0.9359	1.0402	0.8606	0.8742	0.7314	1.0124	1.0686	0.8615	1.1565	1.015	1.0817
424	gamma-glutamylglutamine	Peptide	Gamma-glutamyl Amino Acid	2730	LC/MS Pos Early	1140	1430	276.119	10148-81-9	150914	C05283	HMDB11738	0.7835	0.5761	0.9581	0.693	0.6649	0.7347	0.4952	0.6595	0.6952	0.9332	0.7132	0.7443	0.7045	0.6479	0.7224	0.8537	1.0352	0.7791	0.7863	0.6535	1.1578	0.8942	0.9516	0.7437	0.6341	1.2822	0.8494	0.8657	0.8589	1.0452	0.7891	0.7674	0.9863	0.9049	1.0218	1.0693	1.3767
425	gamma-glutamylglycine	Peptide	Gamma-glutamyl Amino Acid	33949	LC/MS Pos Early	100001294	1535	205.082	1948-29-4	165527		HMDB11667	0.7198	0.7394	1.0548	0.7314	0.5883	0.5714	0.6306	0.7086	0.7845	0.7978	0.7256	0.65	0.6453	0.932	0.7094	0.6432	0.7224	0.5479	0.8935	0.6715	1.1661	0.7222	0.9254	0.6201	0.684	1.2315	0.9268	0.685	0.6489	0.7723	0.7645	0.9344	1.064	0.7957	0.968	0.8537	1.1276
426	gamma-glutamylhistidine	Peptide	Gamma-glutamyl Amino Acid	18245	LC/MS Pos Early	1235	2740	285.119	37460-15-4	7017195			1.0225	0.5459	1.3161	0.832	0.734	0.8368	0.7463	0.6902	0.6409	0.8823	0.6693	0.5837	0.793	0.8513	0.6051	0.7259	1.0668	0.5913	0.7103	0.6993	0.851	0.5986	0.6757	0.4657	0.4751	1.3174	0.8984	0.714	0.5273	0.679	0.8976	0.7142	0.8362	0.7803	1.0483	1.0974	0.9291
427	gamma-glutamylisoleucine*	Peptide	Gamma-glutamyl Amino Acid	34456	LC/MS Pos Early	100001485	2940	261.144		14253342		HMDB11170	1.1014	0.8858	0.7915	0.787	1.1056	0.5559	1.0104	0.9055	0.3502	0.495	0.7429	0.97	0.3084	0.9466	0.7854	0.4718	1.438	0.9094	1.3825	0.9246	1.5858	0.767	1.0395	0.8097	0.8213	0.5731	1.3017	1.0138	0.7201	0.7938	0.9655	1.2061	0.9027	0.9854	1.0363	0.8429	1.1942
428	gamma-glutamylleucine	Peptide	Gamma-glutamyl Amino Acid	18369	LC/MS Pos Early	1268	2991	261.144	2566-39-4	151023		HMDB11171	0.8528	0.8437	0.6649	0.8445	0.8418	0.6561	0.9622	0.7345	0.6407	0.6783	0.928	0.6417	0.554	0.812	0.8286	0.6011	0.9996	0.6316	1.2307	0.9433	1.2558	0.9103	1.0266	0.6627	0.7281	0.7915	1.0326	0.9276	0.9176	0.814	0.8765	0.8807	1.313	0.8536	1.3212	1.0884	1.0988
431	gamma-glutamylmethionine	Peptide	Gamma-glutamyl Amino Acid	44872	LC/MS Pos Early	100001313	2640	279.101	17663-87-5	7009567		HMDB29155	1.3007	0.8809	0.9462	1.1528	0.7563	0.6238	1.0362	0.7256	0.8709	0.7697	0.6455	0.6477	0.9905	1.0121	0.9401	0.6333	0.7313	0.5507	1.1079	0.9496	1.0978	0.7062	0.9615	0.4035	0.9395	1.1029	0.911	0.8121	0.651	0.7557	1.1547	1.1391	1.4376	1.0785	1.4421	1.1312	0.9068
432	gamma-glutamylphenylalanine	Peptide	Gamma-glutamyl Amino Acid	33422	LC/MS Pos Early	100000491	2992	295.129	7432-24-8	111299		HMDB00594	0.8033	0.7792	1.0797	0.8052	0.7701	0.7935	0.8753	0.6566	0.6432	1.3028	0.7542	0.5071	0.5228	0.7551	0.7264	1.0027	0.7311	0.5465	1.0265	0.7959	1.0973	0.6441	0.8908	0.5202	0.6425	1.857	0.9404	0.8732	0.7353	0.717	0.8005	0.9497	1.5722	0.8153	1.3475	1.236	0.9906
434	gamma-glutamyltryptophan	Peptide	Gamma-glutamyl Amino Acid	33947	LC/MS Neg	100001295	1960	332.125	66471-20-3	3989307		HMDB29160	1.2937	0.7027	1.9635	1.3303	0.7211	0.7279	1.1035	0.8775	1.2877	0.8984	0.6687	0.8126	1.1121	1.2106	0.9348	0.565	0.8722	0.6519	1.1816	1.2293	1.3753	0.6606	0.9412	0.5156	0.8028	1.6999	1.3151	1.1767	1.1312	0.8788	1.0033	1.0148	1.3799	1.5206	1.7257	1.0775	1.7819
435	gamma-glutamyltyrosine	Peptide	Gamma-glutamyl Amino Acid	2734	LC/MS Pos Early	1102	2508	311.124	7432-23-7	94340		HMDB11741	0.9763	0.7264	1.4007	1.0096	0.5979	0.7602	0.8155	0.6625	0.66	1.0073	0.4723	0.3825	0.9612	0.8335	0.7412	0.7293	0.8397	0.5355	1.1887	1.0099	0.9857	0.5281	0.8159	0.3664	0.6659	1.8926	0.9081	0.5293	0.4461	0.5259	0.9783	0.9557	0.9952	0.6309	0.9129	0.6139	0.6272
436	gamma-glutamylvaline	Peptide	Gamma-glutamyl Amino Acid	43829	LC/MS Pos Early	100001126	2700	247.129	2746-34-1	7015683		HMDB11172	1.0698	0.8033	0.9267	1.016	0.8071	0.6707	1.02	0.8055	0.8798	0.6838	0.8276	1.0078	1.0035	1.0021	0.8538	0.7103	1.4273	0.719	1.1756	1.1775	1.1691	0.8836	0.9949	0.7106	0.7473	0.8596	1.2008	0.9914	0.8331	0.8867	1.0247	1.029	0.9765	0.9973	1.1282	1.038	1.2034
3397	gamma-tocopherol/beta-tocopherol	Cofactors and Vitamins	Tocopherol Metabolism	52473	LC/MS Pos Late	100008998	2384	416.364					1.1956	0.7461	1.3862	0.4878	1.1089	1.1193	1.4342	0.3737	1.0634	1.0521	1.1573	0.7347	0.9477	0.619	0.7744	0.2895	0.5553	0.6761	0.1268	0.4839	0.8723	0.8995	0.6085	0.1747	0.5932	0.476	0.8413	1.2058	0.4139	0.4322	0.1698	0.1913	1.0042	1.1524	0.6731	0.7727	0.8325
3612	genistein	Xenobiotics	Food Component/Plant	32448	LC/MS Neg	100001221	3754	269.046	446-72-0	5280961	C06563	HMDB03217	1.1162	1.0952	1.5822	0.3245	1.2636	1.3208	1.0918	0.9963	1.2429	2.2053	0.4223	0.4332	1.3298	0.8584	0.8642	1.0654	0.4009	1.0487	1.2567	1.246	1.7498	1.005	0.9172	0.2773	1.2753	2.0896	1.1908	0.6764	0.2711	0.2088	0.5471	0.8606	0.521	1.0214	1.8053	0.8178	0.2088
3681	gluconate	Xenobiotics	Food Component/Plant	587	LC/MS Polar	338	2922	195.051	527-07-1	10690	C00257	HMDB00625	1.0208	0.8907	0.7555	0.6103	0.9901	0.7372	0.9428	0.6767	0.9095	0.8986	0.9917	0.5973	1.2179	1.0401	0.7252	0.5627	0.9763	0.7801	0.8278	0.5203	1.3185	0.9047	0.8209	0.5876	0.5643	0.8726	0.9991	0.3898	0.8302	0.7381	1.6181	0.8874	1.4155	1.4416	1.0265	0.9514	1.0966
865	glucose	Carbohydrate	Glycolysis, Gluconeogenesis, and Pyruvate Metabolism	48152	LC/MS Polar	572	2342	225.062	50-99-7	79025	C00031	HMDB00122	1.1493	1.0371	0.7892	0.9132	1.1443	0.9199	0.9563	0.9872	1.0735	0.735	1.022	1	1.2211	1.0948	1.0771	0.6733	1.001	1.07	1.0583	0.8738	1.1434	1.0239	0.9968	0.9449	1.0223	0.826	1.0457	0.982	0.9259	0.8822	1.2124	1.0124	0.891	0.967	0.8416	0.8267	0.8156
1023	glucuronate	Carbohydrate	Aminosugar Metabolism	15443	LC/MS Polar	100000257	3233.3	193.035	207300-70-7	444791	C00191	HMDB00127	1.2214	0.8635	0.8529	0.7344	1	0.7251	0.8576	0.8859	1.0976	0.7309	0.9613	0.7738	1.5107	0.9152	0.8923	0.5244	1.0551	0.9053	0.8595	0.7436	1.5412	1.0648	0.7836	0.7489	0.9331	0.9534	0.9853	0.9102	1.0953	0.7435	0.9479	0.8405	1.151	1.0946	0.9606	0.8937	1.0763
40	glutamate	Amino Acid	Glutamate Metabolism	57	LC/MS Pos Early	561	1500	148.06	56-86-0	611	C00025	HMDB00148	0.6005	0.89	1.4678	0.7016	1.0009	0.9428	0.7576	0.7999	1.3313	1.7285	1.0503	0.7267	0.6707	1.5041	0.8023	1.2198	0.7734	0.6456	0.6758	0.7855	1.0614	0.783	1.306	0.6552	0.5639	1.7074	1.0176	0.9455	0.9934	0.8719	0.6335	0.6878	0.8232	1.0258	1.2661	0.7848	0.966
41	glutamine	Amino Acid	Glutamate Metabolism	53	LC/MS Pos Early	563	1291	147.076	56-85-9	5961	C00064	HMDB00641	0.8668	0.7519	1.1682	0.817	1.0417	1.1003	0.682	0.7886	0.9058	1.3798	0.9713	0.9829	0.9043	0.8779	0.8371	1.1758	0.9643	0.9341	0.7624	0.7883	1.0966	1.0435	0.9255	0.8303	0.7002	1.0942	0.7885	0.8367	0.9299	0.9418	0.8189	0.8177	0.8429	0.9095	0.8229	0.8602	1.0429
98	glutarate (pentanedioate)	Amino Acid	Lysine Metabolism	396	LC/MS Polar	339	2900	131.035	110-94-1	743	C00489	HMDB00661	0.6538	1.3112	1.2594	0.7144	1.389	0.6264	1.2253	0.6884	1.0999	1.0636	1.086	0.8549	0.755	0.7794	0.7658	0.6844	1.0572	0.8417	0.7945	1.4695	1.433	0.6849	1.0947	0.829	0.6124	0.4655	1.4872	0.839	0.6138	0.4575	0.8662	0.7721	0.7751	0.5369	0.6717	0.2699	0.5084
99	glutarylcarnitine (C5-DC)	Amino Acid	Lysine Metabolism	44664	LC/MS Pos Early	100001593	2393	276.144	102636-82-8	71464488		HMDB13130	1.0077	0.7208	1.0568	1.0728	1.4889	1.3317	0.6532	0.8431	0.9923	0.8302	1.3697	1.0177	0.8355	1.2499	0.9575	0.8345	0.9206	0.8888	0.992	0.8799	1.3237	0.6952	1.4185	0.7265	0.788	0.8614	0.9547	0.9292	1.2092	1.0586	0.9528	0.9837	1.0558	0.9782	0.9603	0.8754	1.1716
402	glutathione, oxidized (GSSG)	Amino Acid	Glutathione Metabolism	27727	LC/MS Pos Early	448	2667	613.159	103239-24-3	65359	C00127	HMDB03337	0.6783	0.7689	0.6576	1.007	0.7368	0.6969	0.7622	0.8657	0.6876	0.5331	1.0019	1.014	1.1209	1.5733	0.9797	0.7322	1.5598	0.787	1.7687	1.113	1.523	0.9799	1.492	0.941	0.8713	1.727	1.6415	1.1903	1.7429	1.2338	1.3591	1.2759	1.3526	1.2112	1.6223	1.3316	1.4917
885	glycerate	Carbohydrate	Glycolysis, Gluconeogenesis, and Pyruvate Metabolism	1572	LC/MS Polar	1052	2070.4	105.019	600-19-1	752	C00258	HMDB00139	0.27	1.1612	0.8428	0.9191	0.7434	0.7336	1.0547	0.8756	0.2605	0.7771	1.003	0.9156	0.9071	0.9594	0.9303	1.0284	0.3093	0.8728	1.0995	1.2701	0.2398	0.9025	1.167	1.1148	0.6594	0.6497	1.125	1.127	0.2298	1.2517	0.9206	0.8129	0.3987	0.8739	0.7094	0.9971	0.9143
2122	glycerol	Lipid	Glycerolipid Metabolism	15122	LC/MS Neg	1254	758	91.0401	56-81-5	753	C00116	HMDB00131	1.2804	1.2235	1.6262	1.0804	0.7401	2.0266	1.4744	0.8056	0.9321	1.1029	1.3681	1.1925	2.3195	1.7139	1.1091	1.3558	1.7556	1.2363	1.425	1.1749	1.5671	1.0769	1.9685	1.353	1.5975	1.752	0.8921	0.992	1.0059	1.6061	1.6659	1.0925	1.0628	1.5524	0.7092	0.9809	2.6013
2123	glycerol 3-phosphate	Lipid	Glycerolipid Metabolism	43847	LC/MS Pos Early	100000258	580	173.021	29849-82-9	754	C00093	HMDB00126	0.7576	0.7481	0.9627	0.9	1.2529	0.8342	0.8475	0.8875	1.0422	0.8069	1.3049	1.034	1.0684	1.7549	1.1536	0.9227	1.388	1.042	1.1578	1.1116	1.0007	1.1122	1.1672	1.1307	0.7359	0.9492	1.0344	1.1616	1.0037	1.2569	0.7945	0.7711	0.9945	0.9194	0.9948	0.8271	0.9258
1598	glycerophosphoethanolamine	Lipid	Phospholipid Metabolism	37455	LC/MS Polar	100001620	3075	214.049	33049-08-0	123874	C01233	HMDB00114	0.7162	0.7871	0.7796	0.878	1.0435	0.6231	0.9144	0.9077	0.9139	0.9637	1.0101	0.9699	1.1461	0.7637	0.9018	0.7887	0.5122	0.8987	0.6418	0.819	0.7736	0.9096	0.8075	0.9032	0.7482	1.2046	0.9367	0.9656	0.9695	0.8914	0.8465	0.779	1.0251	1.2359	1.2137	1.3053	1.0797
2128	glycerophosphoglycerol	Lipid	Glycerolipid Metabolism	48857	LC/MS Polar	100001619	2430	245.043		439964	C03274		0.9581	1.0474	0.9856	0.9263	1.2192	0.7406	1.1758	0.8633	0.9779	1.1092	1.5905	1.0898	1.1865	0.9823	0.9995	0.6846	1.3399	1.0733	1.1045	0.855	1.1792	1.3481	0.7705	0.9845	1.2055	1.4261	1.4192	1.1723	1.0538	1.5172	1.0405	0.7648	1.4123	1.3743	2.0218	1.2023	1.1022
1594	glycerophosphorylcholine (GPC)	Lipid	Phospholipid Metabolism	15990	LC/MS Pos Early	100000269	672	258.11	28319-77-9	71920	C00670	HMDB00086	1.0628	1.1027	0.4283	1.1018	1.284	0.4503	0.8855	0.8986	0.9257	0.4492	0.9009	1.166	1.037	0.974	0.9936	0.3984	1.0585	1.1406	1.1403	1.0549	1.4777	1.2043	0.9001	0.976	1.332	0.8995	1.1018	0.9415	1.3726	1.0911	1.0701	1.1816	0.8717	0.944	0.9657	1.0207	1.1277
1	glycine	Amino Acid	Glycine, Serine and Threonine Metabolism	58	LC/MS Pos Early	340	1375	76.0393	56-40-6	750	C00037	HMDB00123	0.8187	0.8218	1.3085	0.7694	0.8773	0.9152	0.6948	0.7801	0.962	1.2854	0.8821	0.6501	0.7612	0.9369	0.7841	1.1718	0.7393	0.7824	0.7633	0.76	1.0421	0.8576	0.8331	0.6004	0.8014	1.2466	0.8051	0.7327	0.7054	0.7907	0.6931	0.827	0.9344	0.7975	0.9143	0.8665	0.9477
2556	glycocholate	Lipid	Primary Bile Acid Metabolism	18476	LC/MS Neg	342	5163	464.302	475-31-0;863-57-0	10140	C01921	HMDB00138	0.1878	0.3728	8.6638	0.1878	0.5784	5.3672	0.1878	0.1878	0.1878	10.408	0.1878	0.2113	0.1878	0.1878	0.1878	6.9622	0.1878	0.1878	0.1878	0.6078	0.1878	0.8418	0.1878	0.1878	0.1878	9.3466	0.5412	0.1878	0.3936	0.3481	0.1878	0.278	0.7136	1.1877	1.1594	0.1878	0.7646
2643	glycosyl ceramide (d18:1/20:0, d16:1/22:0)*	Lipid	Ceramides	57595	LC/MS Pos Late	100015882	3414	756.635					1.274	1.1094	0.9961	2.0239	1.09	1.0702	1.2898	0.8392	0.8629	0.3522	1.4873	1.3646	1.2896	1.2713	0.9539	0.3127	0.8484	1.085	0.7903	1	1.5738	1.8729	0.783	1.2782	1.1163	1.0228	1.109	1.4105	1.9179	1.7456	1.3445	1.1117	1.1912	1.563	0.8905	1.3757	0.7986
2286	glycosyl-N-palmitoyl-sphingosine (d18:1/16:0)	Lipid	Sphingolipid Metabolism	53013	LC/MS Pos Late	100009272	2623	700.572					0.7227	0.4773	0.6347	0.9694	0.5294	0.7086	0.8622	0.4743	0.5471	0.4048	0.7985	0.8005	0.7528	0.5768	0.5042	0.2574	0.4431	0.497	0.4434	0.5728	0.7187	0.8999	0.3491	0.5262	0.6469	1.0213	0.5287	0.6728	1.4315	1.0661	0.4539	0.6421	1.1908	1.2401	1.0079	1.5188	1.1716
2287	glycosyl-N-stearoyl-sphingosine (d18:1/18:0)	Lipid	Sphingolipid Metabolism	52234	LC/MS Pos Late	100001882	3053	728.604					1.5267	0.8525	0.6186	2.1223	0.7891	0.8386	0.981	0.5268	0.6754	0.162	1.0934	1.5116	1.1408	0.8546	0.7214	0.1938	0.4986	0.9988	0.7446	0.6855	1.5892	1.7328	0.6595	1.062	1.1312	1.0232	1.0205	1.6163	3.3943	1.8257	0.9043	1.0685	1.1819	1.9457	0.888	1.2808	0.5587
2328	glycosyl-N-tetracosadienoyl-sphingosine (d18:1/24:2)*	Lipid	Sphingolipid Metabolism	57452	LC/MS Pos Late	100015703	3380	808.666					0.8384	0.5886	0.6308	0.9883	0.4902	0.6904	0.82	0.4649	0.6228	0.3845	0.6289	0.7404	0.647	0.5624	0.6133	0.3361	0.595	0.5339	0.4943	0.5896	0.8014	0.8973	0.4149	0.5674	0.6673	0.815	0.6133	0.7838	1.0008	1.012	0.5747	0.8582	0.8654	1.0646	0.7063	0.9592	0.8336
373	guanidinoacetate	Amino Acid	Creatine Metabolism	43802	LC/MS Pos Early	344	1937	118.061	352-97-6	763	C00581	HMDB00128	1.2099	0.9438	2.156	1.019	1.0368	1.2788	1.0941	1.1276	1.6166	2.8003	1.3436	1.0981	0.8529	2.4689	0.9093	1.0728	0.9343	0.675	0.7546	0.9084	1.1935	0.5995	1.3116	0.6541	0.6612	1.7279	0.8929	1.007	0.6803	0.8586	0.8175	0.7511	0.5467	1.397	1.2156	0.9006	0.993
3382	gulonate*	Cofactors and Vitamins	Ascorbate and Aldarate Metabolism	46957	LC/MS Polar	100001586	2750	195.051	20246-53-1	9794176	C00257	HMDB03290	0.9834	0.5412	0.6432	1.0615	1.2133	0.4365	1.2346	1.2205	0.8492	0.5293	1.4714	1.2685	0.8429	1.4455	0.6685	0.5404	1.3373	1.0218	0.9702	1.2182	0.7895	0.6579	1.0541	1.0432	0.7682	0.5123	1.4877	1.286	0.9308	1.2321	1.5258	0.8731	1.3492	1.3118	0.9592	1.5307	0.9116
3419	heme	Cofactors and Vitamins	Hemoglobin and Porphyrin Metabolism	41754	LC/MS Pos Late	100001386	1124	616.176	14875-96-8	26945	C00032	HMDB03178	1.178	1.4242	0.5766	1.1873	1.1125	1.0511	0.8339	1.0174	1.8373	1.0798	0.982	0.8892	2.3836	1.4864	1.0693	0.8604	1.5263	0.7122	1.5849	0.8665	2.086	1.8525	0.8064	0.9259	2.1141	2.2847	0.7514	0.3192	2.6949	0.9686	1.9664	2.2318	2.0986	2.1093	1.1441	1.0523	1.7947
1253	hexadecanedioate	Lipid	Fatty Acid, Dicarboxylate	35678	LC/MS Neg	100001614	4615	285.207	505-54-4	10459	C19615	HMDB00672	0.3975	0.8733	2.5972	1.0056	1.2569	1.278	0.3847	0.694	0.4493	1.0207	0.9019	0.7242	1.0188	1.3476	0.6498	1.3848	0.9045	1.118	0.782	0.9529	1.5315	0.912	1.1375	1.3313	0.8952	1.2313	0.8857	0.9944	1.3713	1.247	0.7482	0.5509	0.7856	1.2301	0.9254	0.8552	1.3462
1329	hexanoylcarnitine (C6)	Lipid	Fatty Acid Metabolism(Acyl Carnitine)	32328	LC/MS Pos Early	100000781	3308	260.186	6920-35-0	6426853		HMDB00705	0.5085	0.6071	1.525	0.6949	0.7263	1.1429	0.975	0.4972	0.5413	2.0929	0.8718	0.5952	0.3476	0.7883	0.5581	1.4265	0.7033	0.7496	0.8273	1.3377	0.946	0.5787	0.9794	0.6619	0.6576	1.4183	1.2213	0.8801	0.9621	0.9316	0.6815	0.5799	0.888	1.0545	0.7873	0.619	1.3468
1316	hexanoylglycine	Lipid	Fatty Acid Metabolism(Acyl Glycine)	35436	LC/MS Neg	100001527	2900	172.098	24003-67-6	99463		HMDB00701	0.9412	1.0637	0.9917	1.4885	0.9111	0.6272	0.7808	0.8877	0.8464	0.5668	1.2496	1.1458	1.0748	2.0091	0.8035	0.7234	1.4154	1.3505	1.294	1.0083	1.8042	0.9366	1.3301	2.0857	1.2951	0.7778	1.9113	1.7899	1.6453	1.4291	1.4009	1.0094	0.9339	1.5785	0.7559	1.0574	2.7235
3452	hippurate	Xenobiotics	Benzoate Metabolism	15753	LC/MS Neg	100000014	2106.9	178.051	495-69-2	464	C01586	HMDB00714	1.1144	1.2136	0.2032	1.0309	1.1365	0.2284	0.6203	0.5967	0.9952	0.5126	0.4118	0.3195	3.0875	0.5445	0.7533	1.1877	1.18	1.567	0.0974	1.709	2.204	0.2573	1.8063	0.3401	2.2726	0.6065	0.2787	1.9326	0.417	1.1161	1.9729	1.2494	1.0808	1.1528	1.0048	0.208	1.202
74	histamine	Amino Acid	Histidine Metabolism	1574	LC/MS Pos Early	354	3035	112.087	51-45-6	774	C00388	HMDB00870	0.7486	0.7881	1.5931	1.6284	1.4598	1.0836	0.8918	1.2909	1.3821	0.9773	1.1329	1.2931	0.6533	1.0378	0.9449	1.0247	0.8253	1.0543	0.8995	1.8194	1.2293	1.7189	1.6811	0.8879	0.9164	1.2696	1.4833	1.2459	0.8586	0.913	0.8829	1.0426	0.9636	1.1735	1.2042	0.935	0.8987
61	histidine	Amino Acid	Histidine Metabolism	59	LC/MS Neg	355	755.9	154.062	5934-29-2	6274	C00135	HMDB00177	1.4415	0.888	1.1981	0.9082	1.2022	1.0946	0.7817	0.861	0.9511	1.4024	1.0325	0.9166	0.9702	0.928	0.909	1.1711	0.9225	0.8975	0.8794	0.9554	0.8475	0.9866	0.774	0.6901	1.0335	1.1847	0.9074	0.9177	0.6946	0.7622	0.8815	0.9181	0.9069	0.7658	0.989	1.0031	0.8521
351	homoarginine	Amino Acid	Urea cycle; Arginine and Proline Metabolism	22137	LC/MS Pos Early	100000961	2882	189.135	156-86-5	9085	C01924	HMDB00670	3.1967	1.1697	0.5679	2.9568	1.3735	0.9096	1.156	1.1796	1.7519	0.4588	0.8428	2.0571	1.6612	2.5965	1.2336	0.6421	1.132	1.1564	1.3289	0.6812	2.3012	1.2547	0.8208	0.8467	1.0756	0.6901	1.4265	0.9823	0.9921	0.3682	1.2332	2.1076	0.2604	0.9206	1.0615	0.2604	0.2835
352	homocitrulline	Amino Acid	Urea cycle; Arginine and Proline Metabolism	22138	LC/MS Pos Early	100000963	1908	190.119	1190-49-4	65072	C02427	HMDB00679	0.8022	0.8131	1.0261	1.3478	1.3298	0.724	0.599	0.6776	2.1173	0.5218	1.204	1.0119	2.4742	0.8802	0.7571	0.6078	2.5293	0.915	0.9278	0.9376	0.8163	1.1188	0.768	0.6305	0.8876	0.5039	0.8851	0.9622	1.8122	0.7986	0.7859	0.7644	0.9158	0.7023	0.7712	1.7659	1.2709
4148	hydroquinone sulfate	Xenobiotics	Drug	35322	LC/MS Neg	100001604	1395	188.986	123-31-9	161220	C00530	HMDB02434	1.062	1.5022	1.4359	0.7015	1.3694	0.4922	0.7365	1.3693	1.1764	1.1758	0.6503	0.9451	2.1528	1.3415	1.9323	0.8771	0.2525	0.6943	0.7085	1.4733	1.7985	0.4437	1.3826	0.5401	1.6602	0.7693	1.3406	1.0659	0.6068	0.4703	0.8919	0.9354	1.5204	1.4205	1.7337	0.7635	0.6962
364	trans-4-hydroxyproline	Amino Acid	Urea cycle; Arginine and Proline Metabolism	32306	LC/MS Pos Early	1001	1064	132.066	51-35-4	5810	C01157	HMDB00725	1.2497	0.7515	0.9448	1.1822	1.0199	0.6447	0.7567	0.7328	0.8988	0.856	0.713	0.9296	0.6481	1.0424	0.8632	0.5062	0.8024	0.748	0.6603	0.7101	1.2073	0.6546	0.5373	0.6343	0.7886	1.0851	0.802	0.9917	0.8689	0.9191	0.8792	0.9495	0.9241	1.0057	1.0369	0.9602	0.7408
2596	hyodeoxycholate	Lipid	Secondary Bile Acid Metabolism	27531	LC/MS Neg	100000777	5097	391.285	83-49-8	5283820	C15517	HMDB00733	2.8695	0.447	14.4354	1.3163	0.6379	2.8522	0.2909	0.5	0.0574	7.0432	0.0574	0.3395	0.3538	0.0574	0.2543	7.2783	0.4798	0.1489	0.3729	0.7162	0.2928	0.5313	0.0574	0.0574	0.3393	10.5359	1.0179	1.8504	0.7305	2.4872	1.0922	0.4212	0.997	2.1949	2.2461	0.1065	1.2069
334	hypotaurine	Amino Acid	Methionine, Cysteine, SAM and Taurine Metabolism	590	LC/MS Polar	358	2763.4	108.012	300-84-5	107812	C00519	HMDB00965	0.814	0.7976	4.8182	0.9445	0.7291	2.7858	1.0901	0.7254	0.8594	6.1257	0.6772	0.508	0.8337	1.6379	0.8124	3.4374	0.9072	0.7354	1.2002	0.7469	1.1043	0.6592	1.0144	0.4374	0.6896	7.9332	1.1545	0.8884	0.7342	0.5958	1	1.0374	0.9594	0.8913	1.3804	0.8856	0.8161
3193	hypoxanthine	Nucleotide	Purine Metabolism, (Hypo)Xanthine/Inosine containing	3127	LC/MS Pos Early	171	1295	137.046	68-94-0	790	C00262	HMDB00157	0.0076	1.2813	4.9159	0.0358	0.3697	0.3384	0.0076	0.3744	0.0076	0.0076	5.5898	0.0076	0.0076	11.8572	0.7706	0.6892	0.6974	1.8473	5.6495	1.7975	0.113	0.062	3.3273	0.1762	0.029	0.0797	0.1477	0.0891	0.0076	0.1032	0.441	0.9975	0.0168	0.0076	0.0408	0.0076	0.0076
72	imidazole lactate	Amino Acid	Histidine Metabolism	15716	LC/MS Pos Early	100000263	2040	157.061	14403-45-3	440129	C05568	HMDB02320	1.1622	0.8772	0.3153	0.3153	0.8212	1.1509	1.6603	0.3153	0.3153	1.0089	0.9921	0.3153	1.0873	2.0193	0.3153	0.678	1.4492	0.6664	0.8711	0.3153	0.8817	0.3153	0.9481	0.3153	0.3153	0.3153	0.3153	0.3153	0.3153	0.3153	0.3153	1.1914	0.5541	0.7368	0.3153	1.6508	1.2772
70	imidazole propionate	Amino Acid	Histidine Metabolism	40730	LC/MS Pos Early	100003434	2263	141.066	1074-59-5	70630		HMDB02271	1.1359	1.6536	1.6762	1.0204	0.4752	0.7194	0.5479	1.2116	1.5336	1.8411	0.5247	1.364	0.7176	0.4022	1.0318	0.3473	0.5148	0.5387	2.6015	1.1626	0.451	1.5572	1.7794	0.1995	1.3173	1.4679	0.6754	2.6038	1.1285	0.9621	2.8094	0.4823	1.014	1.3194	0.7559	0.9195	1.7097
4450	iminodiacetate (IDA)	Xenobiotics	Chemical	21025	LC/MS Pos Early	100000900	808	134.045	142-73-4	8897	C19911	HMDB11753	1.0677	1.0567	1.1225	1.0882	1.0503	0.9181	0.9232	1.0707	1.0488	0.9447	0.9908	1.0078	0.9757	0.8592	0.9691	1.0157	0.9785	0.9898	1.0556	0.8976	1.0744	0.9242	0.9488	1.1179	1.0164	0.9684	1.0097	0.9787	0.9867	1.0693	0.9689	1.0638	0.9989	1.0442	1.0834	1.1	0.9438
233	indole-3-carboxylic acid	Amino Acid	Tryptophan Metabolism	38116	LC/MS Neg	100002185	1708.8	160.04	771-50-6	69867	C19837	HMDB03320	0.9463	1.1561	1.4996	1.1315	1.3574	1.1747	0.7931	1.2366	1.0943	1.6952	1.6529	1.2168	1.2322	0.9945	1.1014	1.4091	0.8619	1.1564	1.2731	1.4205	1.0602	0.2744	1.7246	0.6821	1.0006	1.0028	1.2772	1.5592	1.0533	1.023	1.3287	1.3659	0.9436	1.3653	1.2587	0.8218	0.9209
226	indoleacetate	Amino Acid	Tryptophan Metabolism	27513	LC/MS Neg	100001034	2200	174.056	6505-45-9	802	C00954	HMDB00197	1.7581	2.1863	3.4039	2.133	2.0705	1.4341	1.7567	1.6512	0.6516	2.4528	1.2454	0.5545	1.6426	1.3072	1.8577	1.4544	1.5168	0.9946	0.9256	2.3375	1.3894	1.4173	1.3163	0.5659	0.8875	1.3	1.3412	1.5444	0.5158	1.3796	1.4506	2.3935	1.5481	0.7783	1.3122	0.9153	0.9994
235	indoleacetylglycine	Amino Acid	Tryptophan Metabolism	54730	LC/MS Neg	100006730	2610	231.078		446640			2.0219	2.9301	2.4912	2.8079	2.5826	0.8786	2.284	2.578	0.6897	1.2546	1.7203	0.8238	2.1963	2.8951	2.721	0.7544	1.9571	1.1824	1.2247	3.2228	1.7531	1.6458	1.6401	0.6034	1.3956	0.818	2.8266	2.4482	0.6661	1.6707	2.2777	3.1533	2.5476	0.8683	2.494	0.8969	0.8597
3784	indoleacrylate	Xenobiotics	Food Component/Plant	22114	LC/MS Neg	100000800	2511	186.056	1204-06-4	15030923		HMDB00734	0.0756	0.6047	1.6261	0.4274	0.0756	1.625	0.0779	1.0898	0.8602	3.1912	1.6881	1.0733	1.2481	0.0756	1.3592	2.8821	0.1581	1.4451	0.7415	1.6112	0.9018	1.047	0.4224	0.6159	1.0017	0.8923	0.9807	1.35	0.489	0.4371	1.5343	0.1965	0.0756	1.3287	0.9595	0.7205	0.5048
225	indolelactate	Amino Acid	Tryptophan Metabolism	18349	LC/MS Pos Early	100000463	2600	206.081	832-97-3	92904	C02043	HMDB00671	1.1855	0.9676	1.1802	1.0359	1.1765	1.2708	1.4527	0.9733	1.2007	1.5217	1.3282	1.0374	1.332	1.3767	1.2798	1.7608	0.9921	0.9856	1.6629	1.2408	1.132	1.0653	2.2119	0.891	1.1415	1.8332	1.2416	1.0744	0.815	0.9707	1.1167	1.2932	1.5559	0.9962	1.3725	1.1466	1.0049
228	indolepropionate	Amino Acid	Tryptophan Metabolism	32405	LC/MS Pos Early	100001083	3205	190.086	830-96-6	3744		HMDB02302	0.0189	0.8499	1.7456	0.6213	0.0189	1.8279	0.0673	1.0776	0.7721	3.3383	1.6253	1.4064	0.6576	0.0189	1.416	2.6129	0.2015	1.2287	1.0055	1.2648	0.9075	1.0929	0.3357	0.6857	1.1637	1.4803	1.1382	1.3029	0.5889	0.696	1.8122	0.2838	0.0189	1.3335	1.2303	0.92	0.5005
3192	inosine	Nucleotide	Purine Metabolism, (Hypo)Xanthine/Inosine containing	1123	LC/MS Neg	361	1602.1	267.073	58-63-9	6021	C00294	HMDB00195	0.1997	1.9748	6.405	0.391	1.5862	1.0807	0.3006	1.5074	0.6901	0.454	3.9798	1.1751	0.6306	4.9091	1.1397	1.1462	1.4099	2.3113	6.0249	4.1609	0.9787	0.5776	3.0418	1.076	0.4022	0.6104	0.8201	0.5351	0.9457	0.9208	0.8944	1.8346	0.625	0.9166	0.3169	0.2128	0.721
3191	inosine 5'-monophosphate (IMP)	Nucleotide	Purine Metabolism, (Hypo)Xanthine/Inosine containing	2133	LC/MS Pos Early	362	650	349.054	4691-65-0	8582	C00130	HMDB00175	0.2534	0.8244	0.4126	0.2534	0.2534	0.8215	0.2534	1.92	0.2534	0.2534	0.2534	0.8875	0.8748	7.2071	0.2534	1.2376	0.2534	0.2534	1.2488	0.2534	1.556	0.8923	0.6814	0.2534	0.2534	3.3315	1.0254	0.7003	1.9074	0.4528	2.735	1.3036	1.8119	0.4451	0.2534	0.2534	3.47
301	isobutyrylcarnitine (C4)	Amino Acid	Leucine, Isoleucine and Valine Metabolism	33441	LC/MS Pos Early	100001055	2810	232.154	25518-49-4	168379		HMDB00736	0.7921	0.6156	0.9065	0.5956	0.8881	0.7662	0.5045	0.5036	0.5402	0.7632	0.5649	0.6871	0.8171	0.7949	0.6211	0.8764	0.7281	0.5848	0.639	0.7078	0.9298	0.6332	0.7836	0.6087	0.4192	0.6034	0.8021	0.6075	0.6548	0.527	0.7365	1.0014	0.7591	0.5089	0.7372	0.5238	0.7112
275	isoleucine	Amino Acid	Leucine, Isoleucine and Valine Metabolism	1125	LC/MS Pos Early	376	2800	132.102	73-32-5	6306	C00407	HMDB00172	0.9929	0.8377	0.8922	0.8624	1.2048	0.8187	0.8118	0.8434	1.0579	0.8841	1.102	1.0578	1.0374	0.9732	0.9946	0.9572	1.2691	1.1648	1.0008	1.0202	1.1609	1.1067	1.0095	0.8999	0.8935	0.6755	0.9706	1.0113	1.0158	1.0809	0.9854	0.8788	0.9024	0.926	0.9183	0.9164	1.1622
252	isovalerylcarnitine (C5)	Amino Acid	Leucine, Isoleucine and Valine Metabolism	34407	LC/MS Pos Early	100001393	3085	246.17	31023-24-2	6426851		HMDB00688	0.9036	0.7878	0.6996	0.8016	1.0415	1.2188	1.0194	0.8081	0.7052	1.8264	1.034	0.7152	0.719	1.0926	0.8678	0.8902	0.8528	0.7414	1.0442	1.4592	1.0401	0.855	0.5511	0.6506	0.7646	1.2463	1.135	0.8972	0.8505	0.6437	0.808	0.9356	1.4936	0.7403	1.1503	0.9371	0.7557
251	isovalerylglycine	Amino Acid	Leucine, Isoleucine and Valine Metabolism	35107	LC/MS Neg	100001452	1950	158.082	16284-60-9	546304		HMDB00678	0.925	1.1461	0.3881	1.0109	1.0141	0.4176	1.1134	0.8408	1.0716	0.6358	1.5494	0.9432	1.5902	1.5589	1.2036	0.6236	0.9362	1.3386	2.2703	1.7099	1.5039	1.3163	1.1005	1.3178	1.4798	0.7601	2.364	1.4666	1.2503	0.8603	1.0057	1.3831	1.7743	0.8338	1.2348	1.0365	1.1493
1068	itaconate	Energy	TCA Cycle	18373	LC/MS Polar	100000455	2969	129.019	97-65-4	811	C00490	HMDB02092	0.1893	0.2761	0.2652	0.1678	0.1888	0.2083	0.2066	0.3005	0.2434	0.2663	0.1854	0.2229	0.2034	0.2847	0.1974	0.1782	0.1096	0.381	0.1858	0.2454	0.3698	0.3114	0.2044	0.5947	0.291	2.2107	0.4774	1.1929	1.5256	1.9185	0.2005	0.2566	3.8134	1	3.1948	2.2766	3.066
209	kynurenate	Amino Acid	Tryptophan Metabolism	1417	LC/MS Neg	98	2224	188.035	492-27-3	3845	C01717	HMDB00715	0.6805	1.2605	1.2204	0.6979	1.155	0.855	0.8315	1.1218	1.1395	0.7643	1.0113	1.1862	1.6368	1.7565	1.4095	0.9109	0.7592	0.8003	0.8488	1.5712	1.0632	0.7551	1.27	0.7517	0.5766	1.0707	0.9403	0.813	1.16	0.7575	0.5665	0.9382	1.8215	1.1425	1.1207	0.8363	1.5449
205	kynurenine	Amino Acid	Tryptophan Metabolism	15140	LC/MS Pos Early	100000265	2739	209.092	2922-83-0	161166	C00328	HMDB00684	0.344	0.4036	0.3862	0.3552	0.5337	0.3713	0.463	0.3413	0.4721	0.3063	0.4242	0.4844	0.4496	0.5261	0.6929	0.2566	0.4958	0.3256	0.3247	0.4771	0.6489	0.5115	0.3098	0.4329	0.2498	0.8343	0.5097	0.6128	0.9075	0.9117	0.3879	0.5982	1.422	0.9572	1.0436	1.3211	1.2031
882	lactate	Carbohydrate	Glycolysis, Gluconeogenesis, and Pyruvate Metabolism	527	LC/MS Polar	482	1468.8	89.0244	79-33-4	612	C00186	HMDB00190	0.8747	0.9494	1.0854	0.8638	1.0653	0.8918	0.936	0.8868	0.8081	0.8421	1.0901	0.9102	1.1774	1.1069	1.0687	0.8543	0.8915	0.9596	0.9871	1.1803	0.9296	1.075	0.8613	0.9805	0.817	0.9196	0.8953	0.9185	0.7662	0.9311	0.8681	0.8444	1.0894	0.8419	0.8828	1.0176	0.7803
2296	lactosyl-N-palmitoyl-sphingosine (d18:1/16:0)	Lipid	Sphingolipid Metabolism	53010	LC/MS Pos Late	100009030	2527	862.625	4201-62-1				0.2862	0.2862	0.2862	0.2862	0.2862	0.2862	0.2862	0.2862	0.2862	0.2862	0.2862	0.2862	0.2862	0.2862	0.2862	0.2862	0.2862	0.2862	0.2862	0.2862	0.2862	0.2862	0.2862	0.2862	0.2862	0.3588	0.2862	0.2862	0.2862	0.2862	0.2862	0.2862	0.2862	0.2862	0.2862	0.5982	0.2862
1335	laurylcarnitine (C12)	Lipid	Fatty Acid Metabolism(Acyl Carnitine)	34534	LC/MS Pos Late	100001392	1235	344.28	25518-54-1	10427569		HMDB02250	0.9993	0.9103	2.3499	0.8909	0.8335	1.4102	0.5904	0.6502	0.7911	0.5876	1.0211	0.7673	0.9168	0.9632	0.9419	1.5402	1.2998	1.0007	0.7329	0.7256	1.5177	1.0605	1.4005	0.7886	1.0742	1.0532	0.9465	0.974	0.953	1.5339	1.0385	0.8223	0.8821	1.2835	0.5818	0.8157	1.9458
241	leucine	Amino Acid	Leucine, Isoleucine and Valine Metabolism	60	LC/MS Pos Early	397	2864	132.102	61-90-5	6106	C00123	HMDB00687	0.9923	0.835	0.8079	0.8122	1.1829	0.861	0.9027	0.8508	1.0082	0.8279	1.0861	0.9468	1.0893	0.9333	1.0299	0.8699	1.0625	1.0474	1.0661	0.9358	1.1486	1.0866	1.0105	0.8583	0.9627	0.7197	0.9568	0.9654	0.9223	1.0246	0.8707	0.8625	0.9908	0.8481	0.9589	0.8904	1.0101
2260	lignoceroyl sphingomyelin (d18:1/24:0)	Lipid	Sphingolipid Metabolism	57330	LC/MS Pos Late	100006298	3437	815.7	60037-60-7				0.8888	0.972	0.6256	1.1267	0.9888	0.8285	1.0627	1.0288	1.3307	0.5357	1.3167	1.287	1.4626	1.1114	1.0374	0.857	1.1148	1.1995	1.1274	0.939	1.0845	1.4848	1.2005	1.1043	1.0718	0.839	0.9441	0.8208	1.2199	1.2049	1.0156	1.2341	1.1598	1.1911	0.8405	1.6411	1.5366
1366	lignoceroylcarnitine (C24)*	Lipid	Fatty Acid Metabolism(Acyl Carnitine)	57515	LC/MS Pos Late	100015834	1603	512.467					1.2046	0.6431	0.7075	1.3916	1.0538	0.8621	0.9423	0.6726	1.0423	0.7385	0.7807	0.9466	0.9228	1.2098	0.8241	0.6788	0.7852	0.8542	0.6927	0.6462	0.8782	1.0342	0.7655	0.73	0.7611	1.2644	1.0781	1.1301	1.6086	0.9312	0.8352	0.9711	1.0353	1.4237	0.874	1.3913	1.0799
1152	linoleate (18:2n6)	Lipid	Polyunsaturated Fatty Acid (n3 and n6)	1105	LC/MS Neg	180	5535	279.233	60-33-3	5280450	C01595	HMDB00673	1.1174	1.0846	0.6095	1.6557	1.0172	1.3931	1.0517	0.8482	1.3211	0.8189	1.0546	1.0108	1.5584	1.1008	0.8326	1.2132	1.1522	0.9995	0.6994	0.8873	1.0104	0.6477	1.3726	0.8263	1.4338	0.8438	1.0462	0.852	0.9792	1.1094	1.0444	0.6475	1.4967	2.4121	1.2415	2.0454	2.3865
1154	linolenate [alpha or gamma; (18:3n3 or 6)]	Lipid	Polyunsaturated Fatty Acid (n3 and n6)	34035	LC/MS Neg	100001337	5450	277.217		5280934	C06426	HMDB03073	1.3768	1.2614	0.6934	1.673	1.0909	1.9901	1.6877	0.8966	1.9112	0.9312	1.4266	0.9763	2.0577	1.1143	0.8853	1.7466	1.265	1.0503	0.7721	1.0013	1.0572	0.7184	1.8567	1.0366	1.7691	0.9063	1.1508	0.8364	0.9935	1.1608	1.1884	0.7167	1.6923	2.425	1.3045	2.0887	2.962
1342	linolenoylcarnitine (C18:3)*	Lipid	Fatty Acid Metabolism(Acyl Carnitine)	57511	LC/MS Pos Late	100015831	1310	422.326					1.3507	0.9794	1.6246	0.978	0.828	1.4709	0.5681	0.6115	1.0211	0.6576	0.712	0.7342	0.8587	1.0434	0.8303	1.1344	1.1556	0.8646	0.6479	0.6041	1.2837	0.9885	1.1229	0.7977	0.8974	1.2274	0.9088	0.9942	1.0619	1.4696	1.0141	0.855	0.9495	1.3392	0.6613	1.0221	1.7661
1548	linoleoyl ethanolamide	Lipid	Endocannabinoid	52608	LC/MS Neg	100006726	6150	322.275	68171-52-8	5283446		HMDB12252	1.0701	0.8884	0.9821	1.0907	0.8639	1.4482	1.1926	1.116	0.6108	1.2877	1.1237	1.0388	1.1493	1.2958	1.2086	1.2965	1.0399	0.9744	1.1463	1.0421	0.7269	0.9143	1.0446	0.9315	1.2742	1.095	1.3473	0.8849	0.9347	0.9528	1.182	0.6179	1.1813	1.2795	0.8768	1.0356	0.8621
2212	linoleoyl-arachidonoyl-glycerol (18:2/20:4) [1]*	Lipid	Diacylglycerol	54955	LC/MS Pos Late	100010922	2566	658.541				HMDB07257	1.2707	0.8461	1.4059	0.8193	1.1302	0.8189	0.8286	0.7816	1.0222	0.7787	0.6228	0.9583	0.9479	1.1608	0.8334	0.5033	0.7091	0.7159	0.4449	0.7829	0.7922	0.6991	0.7578	0.8199	1.083	1.0506	1.0566	1.049	1.1566	2.0577	0.7433	0.891	3.0006	1.9885	1.7182	2.2186	1.2938
2213	linoleoyl-arachidonoyl-glycerol (18:2/20:4) [2]*	Lipid	Diacylglycerol	54956	LC/MS Pos Late	100010923	2624	658.541				HMDB07257	1.5925	1.0796	1.2732	1.1009	1.1186	0.9113	1.3708	1.0624	1.0984	0.8064	1.2153	1.0158	1.9553	1.6135	0.8379	0.4977	0.7608	0.9182	0.73	0.9778	1.0966	0.9551	0.7572	0.9873	1.4008	0.7632	0.9035	0.8485	1.4353	2.0362	0.7248	0.8979	2.1701	2.4272	1.6169	1.9301	1.4039
[truncated: 221 more rows]
[truncated: 107 more columns]

## Sheet: DilutionNormImpData
												SAMPLE NAME	SFUN-00369	SFUN-00370	SFUN-00371	SFUN-00372	SFUN-00373	SFUN-00374	SFUN-00375	SFUN-00376	SFUN-00377	SFUN-00378	SFUN-00379	SFUN-00380	SFUN-00381	SFUN-00382	SFUN-00383	SFUN-00384	SFUN-00385	SFUN-00386	SFUN-00387	SFUN-00388	SFUN-00389	SFUN-00390	SFUN-00391	SFUN-00392	SFUN-00393	SFUN-00394	SFUN-00395	SFUN-00396	SFUN-00397	SFUN-00398	SFUN-00399	SFUN-00400	SFUN-00401	SFUN-00402	SFUN-00403	SFUN-00404	SFUN-00405
[truncated: 605 more rows]
[truncated: 107 more columns]

[truncated: 2 more sheets: Pathway Heat Map, Line Plots-Pathway]
